# Supplementary material
Source: Research Square preprint supplement (doi:10.21203/rs.3.rs-9041912/v1)

#### **Additional File 4**

***KMT2D* somatic missense mutations identified and confirmed in the discovery and replication cohort.** Listed are 161 somatic missense mutations identified in 144 individuals of the POG13K and CYN16K cohorts (N = 29,596). Each missense variant has been manually reviewed independently by two researchers, by Integrative Genomics Viewer with reads support (related to **Table S11**).

## Table of Contents

|       |                         |    |
|-------|-------------------------|----|
| 1.    | KMT2D.....              | 6  |
| 1.1.  | chr12_49022759_C/T..... | 6  |
| 1.2.  | chr12_49026295_C/T..... | 7  |
| 1.3.  | chr12_49026388_G/A..... | 9  |
| 1.4.  | chr12_49026389_G/A..... | 10 |
| 1.5.  | chr12_49026445_C/T..... | 11 |
| 1.6.  | chr12_49026588_G/T..... | 12 |
| 1.7.  | chr12_49026644_G/A..... | 13 |
| 1.8.  | chr12_49026739_G/A..... | 14 |
| 1.9.  | chr12_49026758_A/G..... | 15 |
| 1.10. | chr12_49027021_C/A..... | 16 |
| 1.11. | chr12_49027220_G/A..... | 17 |
| 1.12. | chr12_49027847_A/G..... | 18 |
| 1.13. | chr12_49027862_C/T..... | 19 |
| 1.14. | chr12_49027886_G/A..... | 20 |
| 1.15. | chr12_49028036_G/A..... | 21 |
| 1.16. | chr12_49028883_T/C..... | 22 |
| 1.17. | chr12_49028929_G/T..... | 23 |
| 1.18. | chr12_49029126_C/T..... | 24 |
| 1.19. | chr12_49029153_G/A..... | 25 |
| 1.20. | chr12_49029153_G/T..... | 26 |
| 1.21. | chr12_49029207_G/A..... | 27 |
| 1.22. | chr12_49030617_G/T..... | 28 |
| 1.23. | chr12_49030729_C/T..... | 29 |
| 1.24. | chr12_49030953_C/A..... | 30 |
| 1.25. | chr12_49030979_T/C..... | 31 |
| 1.26. | chr12_49031291_C/T..... | 32 |
| 1.27. | chr12_49031447_G/A..... | 33 |
| 1.28. | chr12_49031634_C/G..... | 34 |
| 1.29. | chr12_49031980_G/C..... | 35 |
| 1.30. | chr12_49031998_G/A..... | 36 |
| 1.31. | chr12_49032139_C/G..... | 37 |
| 1.32. | chr12_49032140_C/T..... | 38 |
| 1.33. | chr12_49032176_G/T..... | 39 |
| 1.34. | chr12_49032183_T/G..... | 40 |
| 1.35. | chr12_49032429_C/G..... | 41 |
| 1.36. | chr12_49032795_C/A..... | 42 |
| 1.37. | chr12_49032798_C/A..... | 43 |
| 1.38. | chr12_49032991_T/A..... | 44 |

|       |                          |    |
|-------|--------------------------|----|
| 1.39. | chr12_49033064_T/C.....  | 46 |
| 1.40. | chr12_49033141_G/A ..... | 47 |
| 1.41. | chr12_49033262_G/A ..... | 48 |
| 1.42. | chr12_49033363_C/T.....  | 49 |
| 1.43. | chr12_49033420_C/T.....  | 50 |
| 1.44. | chr12_49033421_C/T.....  | 51 |
| 1.45. | chr12_49033492_T/A.....  | 52 |
| 1.46. | chr12_49033581_G/T ..... | 53 |
| 1.47. | chr12_49033612_C/A ..... | 54 |
| 1.48. | chr12_49033645_C/A ..... | 55 |
| 1.49. | chr12_49033804_T/C.....  | 56 |
| 1.50. | chr12_49034068_T/A.....  | 57 |
| 1.51. | chr12_49034135_C/G ..... | 58 |
| 1.52. | chr12_49034149_C/A ..... | 59 |
| 1.53. | chr12_49034150_C/T.....  | 60 |
| 1.54. | chr12_49034436_G/T ..... | 62 |
| 1.55. | chr12_49034446_G/A ..... | 63 |
| 1.56. | chr12_49034449_G/C ..... | 64 |
| 1.57. | chr12_49034621_G/T ..... | 65 |
| 1.58. | chr12_49037259_C/A ..... | 66 |
| 1.59. | chr12_49037311_T/C.....  | 67 |
| 1.60. | chr12_49037664_T/C.....  | 71 |
| 1.61. | chr12_49037668_C/A ..... | 72 |
| 1.62. | chr12_49038060_C/A ..... | 73 |
| 1.63. | chr12_49038292_C/A ..... | 74 |
| 1.64. | chr12_49038543_G/T ..... | 75 |
| 1.65. | chr12_49038579_A/C ..... | 76 |
| 1.66. | chr12_49038582_G/A ..... | 77 |
| 1.67. | chr12_49038706_C/G ..... | 78 |
| 1.68. | chr12_49038772_G/C ..... | 79 |
| 1.69. | chr12_49038801_G/T ..... | 80 |
| 1.70. | chr12_49038952_C/T.....  | 81 |
| 1.71. | chr12_49040068_G/A ..... | 82 |
| 1.72. | chr12_49040263_C/T.....  | 83 |
| 1.73. | chr12_49040361_G/T ..... | 84 |
| 1.74. | chr12_49040490_G/T ..... | 85 |
| 1.75. | chr12_49040499_G/A ..... | 86 |
| 1.76. | chr12_49040610_G/A ..... | 87 |
| 1.77. | chr12_49040626_G/A ..... | 88 |
| 1.78. | chr12_49040661_C/A ..... | 91 |
| 1.79. | chr12_49040662_G/A ..... | 92 |

|        |                               |     |
|--------|-------------------------------|-----|
| 1.80.  | chr12_49040718_T/C.....       | 93  |
| 1.81.  | chr12_49040724_G/A .....      | 94  |
| 1.82.  | chr12_49041084_G/A .....      | 95  |
| 1.83.  | chr12_49041169_T/G .....      | 96  |
| 1.84.  | chr12_49041172_G/A .....      | 97  |
| 1.85.  | chr12_49041174_T/G .....      | 98  |
| 1.86.  | chr12_49041202_G/A .....      | 99  |
| 1.87.  | chr12_49041338_CT/GC/GT ..... | 101 |
| 1.88.  | chr12_49041447_G/A .....      | 102 |
| 1.89.  | chr12_49041451_G/C .....      | 103 |
| 1.90.  | chr12_49041471_G/A .....      | 104 |
| 1.91.  | chr12_49041978_C/T.....       | 105 |
| 1.92.  | chr12_49042127_G/T .....      | 106 |
| 1.93.  | chr12_49042764_G/A .....      | 107 |
| 1.94.  | chr12_49043171_C/A .....      | 108 |
| 1.95.  | chr12_49043745_C/A .....      | 109 |
| 1.96.  | chr12_49043778_G/T .....      | 110 |
| 1.97.  | chr12_49044253_T/C.....       | 111 |
| 1.98.  | chr12_49044267_G/C .....      | 112 |
| 1.99.  | chr12_49045936_C/T.....       | 113 |
| 1.100. | chr12_49046166_T/C.....       | 114 |
| 1.101. | chr12_49046275_C/G .....      | 115 |
| 1.102. | chr12_49046392_G/A .....      | 116 |
| 1.103. | chr12_49046702_A/G .....      | 117 |
| 1.104. | chr12_49047984_G/T .....      | 118 |
| 1.105. | chr12_49048754_T/C.....       | 119 |
| 1.106. | chr12_49049119_T/C.....       | 120 |
| 1.107. | chr12_49049185_G/A .....      | 121 |
| 1.108. | chr12_49049190_C/A .....      | 122 |
| 1.109. | chr12_49049762_C/T.....       | 123 |
| 1.110. | chr12_49049941_G/A .....      | 124 |
| 1.111. | chr12_49050016_G/A .....      | 125 |
| 1.112. | chr12_49050173_G/T .....      | 126 |
| 1.113. | chr12_49050186_C/A .....      | 127 |
| 1.114. | chr12_49050218_G/A .....      | 128 |
| 1.115. | chr12_49050227_C/A .....      | 129 |
| 1.116. | chr12_49050481_T/C.....       | 130 |
| 1.117. | chr12_49050673_G/T .....      | 131 |
| 1.118. | chr12_49050701_CA/TG .....    | 132 |
| 1.119. | chr12_49051115_C/A .....      | 134 |
| 1.120. | chr12_49051192_AT/GC .....    | 135 |

|        |                          |     |
|--------|--------------------------|-----|
| 1.121. | chr12_49051527_G/T ..... | 136 |
| 1.122. | chr12_49051695_G/C ..... | 137 |
| 1.123. | chr12_49051783_G/A ..... | 138 |
| 1.124. | chr12_49051806_A/C ..... | 139 |
| 1.125. | chr12_49051828_G/T ..... | 140 |
| 1.126. | chr12_49051977_G/A ..... | 141 |
| 1.127. | chr12_49052084_C/G ..... | 142 |
| 1.128. | chr12_49052372_C/A ..... | 145 |
| 1.129. | chr12_49052654_C/A ..... | 146 |
| 1.130. | chr12_49052683_G/A ..... | 147 |
| 1.131. | chr12_49052699_G/T ..... | 148 |
| 1.132. | chr12_49054047_C/A ..... | 149 |
| 1.133. | chr12_49054563_T/C.....  | 150 |
| 1.134. | chr12_49054743_G/A ..... | 151 |
| 1.135. | chr12_49054751_A/C ..... | 152 |

# 1. KMT2D

## 1.1. chr12\_49022759\_C/T

| SampleID  | Variants (GRCh38)  | Ref_depth | Alt_depth | Gene         | Consequence      |
|-----------|--------------------|-----------|-----------|--------------|------------------|
| 111103679 | chr12_49022759_C/T | 32        | 9         | <i>KMT2D</i> | missense_variant |

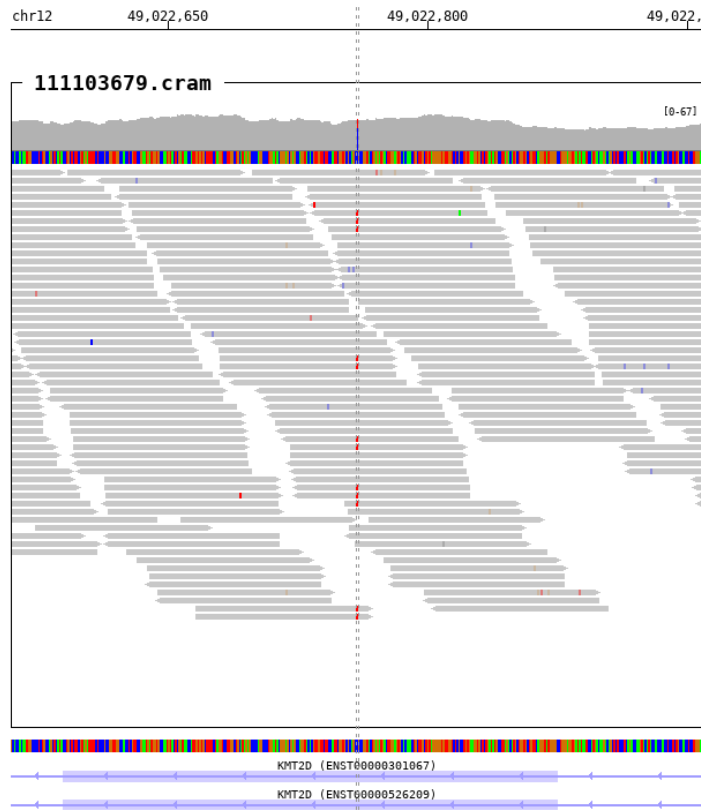

## 1.2. chr12\_49026295\_C/T

| SampleID | Variants (GRCh38)  | Ref_depth | Alt_depth | Gene         | Consequence      |
|----------|--------------------|-----------|-----------|--------------|------------------|
| 17R05642 | chr12_49026295_C/T | 83        | 29        | <i>KMT2D</i> | missense_variant |
| 18R12752 | chr12_49026295_C/T | 97        | 22        | <i>KMT2D</i> | missense_variant |
| 19R23585 | chr12_49026295_C/T | 46        | 15        | <i>KMT2D</i> | missense_variant |

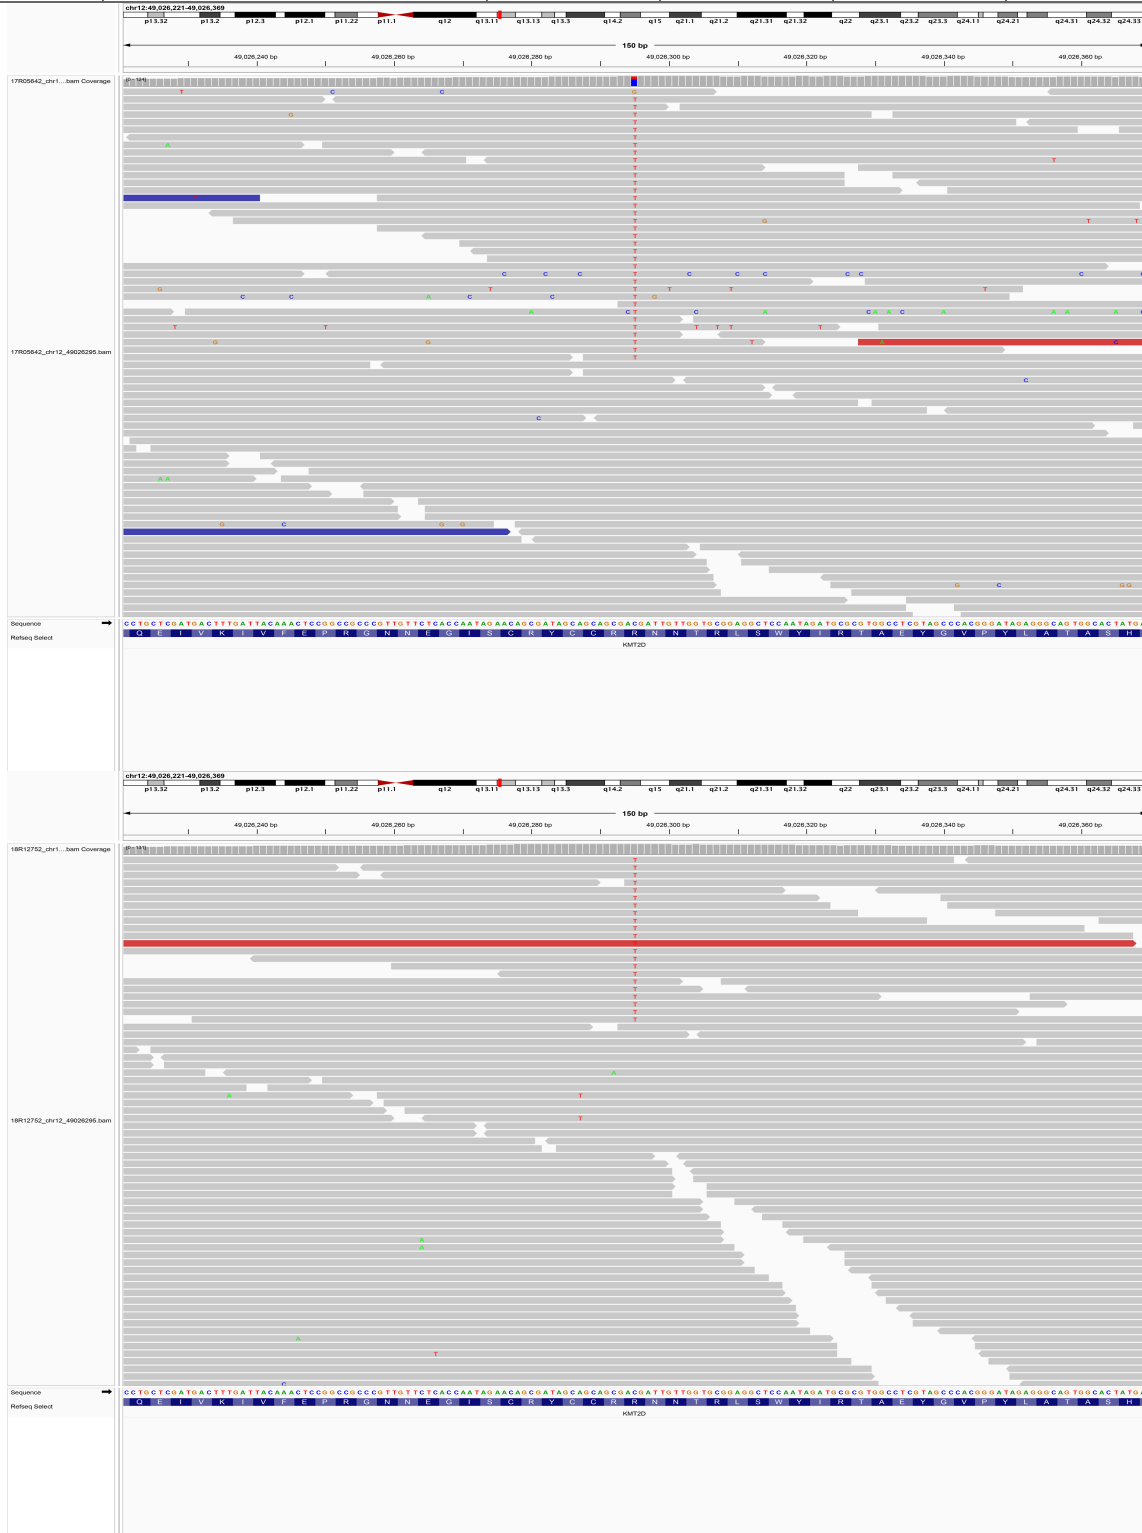

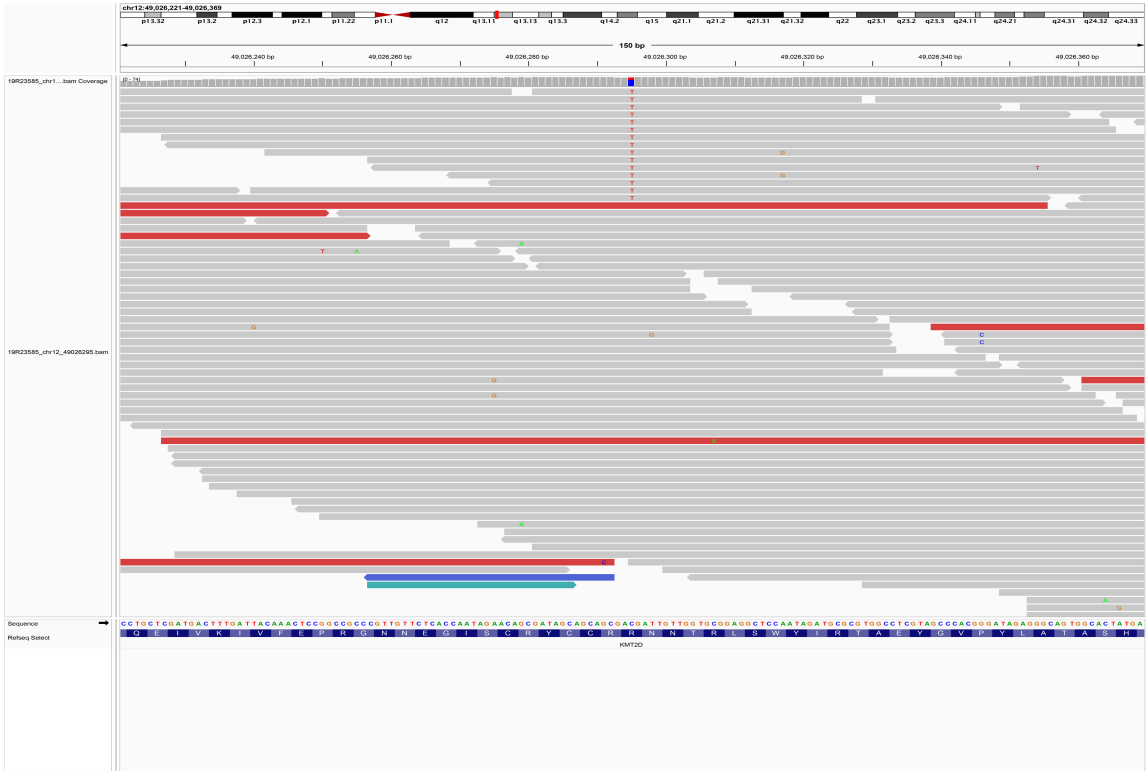

### 1.3. chr12\_49026388\_G/A

| SampleID | Variants (GRCh38)  | Ref_depth | Alt_depth | Gene         | Consequence      |
|----------|--------------------|-----------|-----------|--------------|------------------|
| 18R19160 | chr12_49026388_G/A | 44        | 4         | <i>KMT2D</i> | missense_variant |

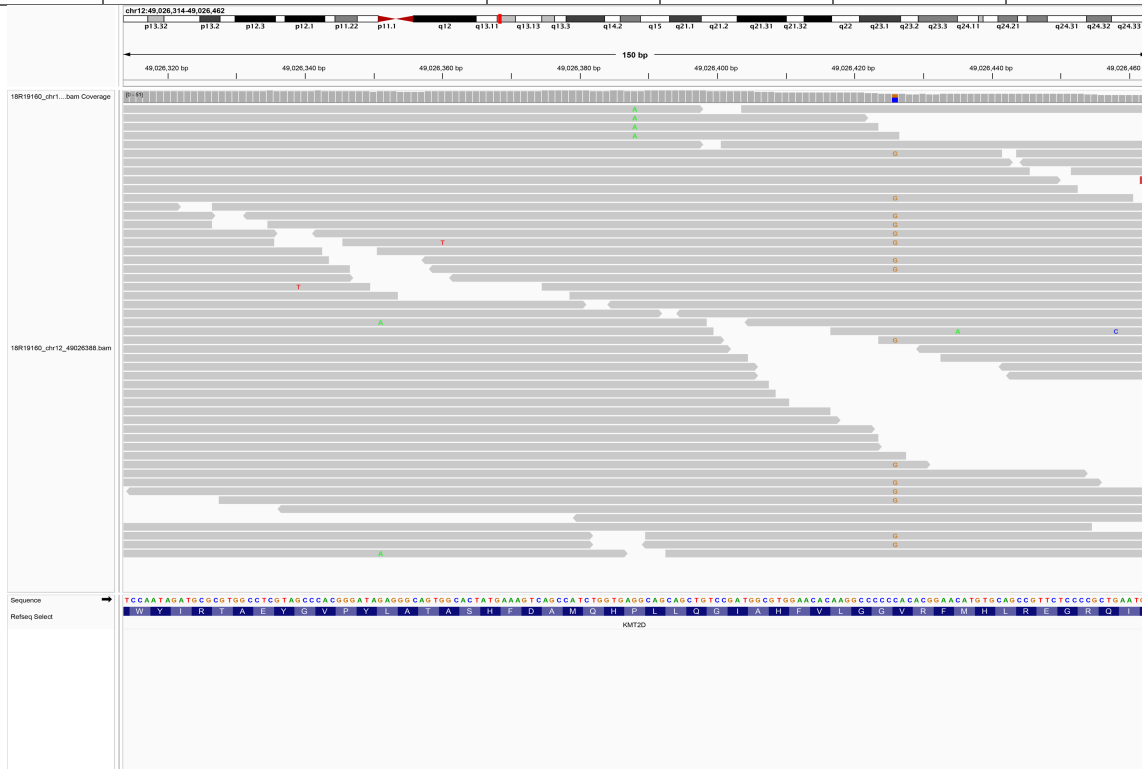

### 1.4. chr12\_49026389\_G/A

| SampleID | Variants (GRCh38)  | Ref_depth | Alt_depth | Gene         | Consequence      |
|----------|--------------------|-----------|-----------|--------------|------------------|
| 18R12969 | chr12_49026389_G/A | 50        | 4         | <i>KMT2D</i> | missense_variant |

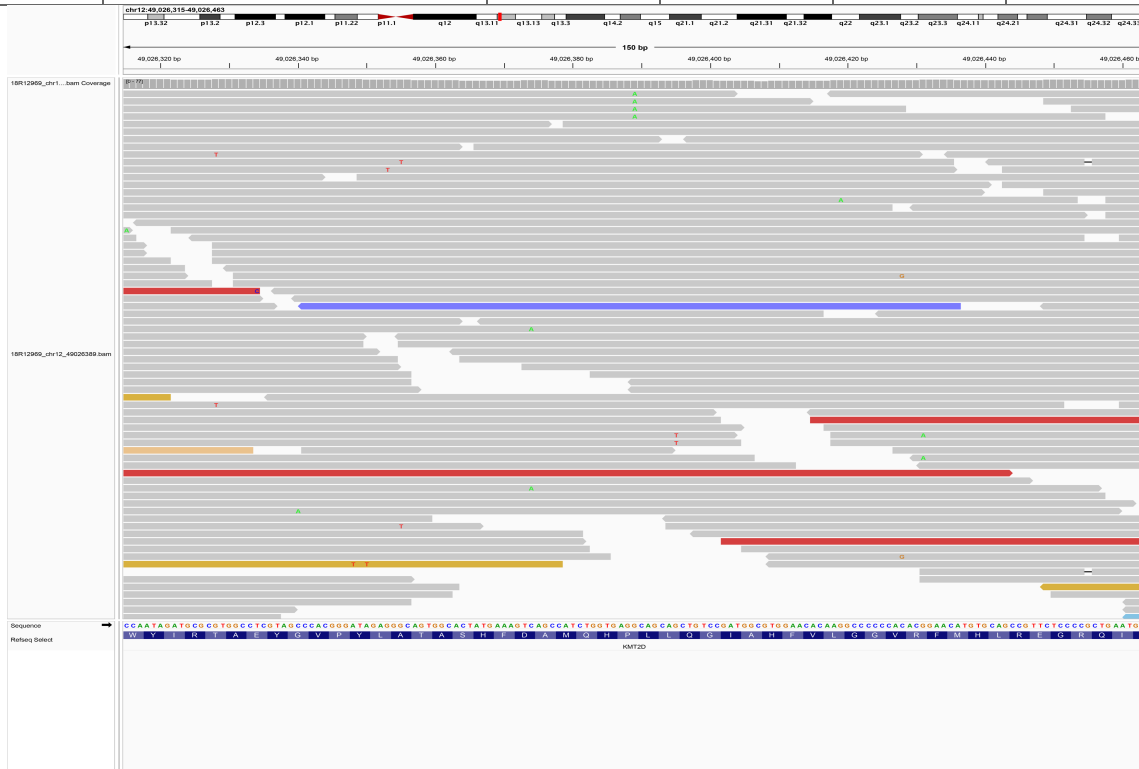

### 1.5. chr12\_49026445\_C/T

| SampleID | Variants (GRCh38)  | Ref_depth | Alt_depth | Gene         | Consequence      |
|----------|--------------------|-----------|-----------|--------------|------------------|
| 17R05890 | chr12_49026445_C/T | 149       | 6         | <i>KMT2D</i> | missense_variant |

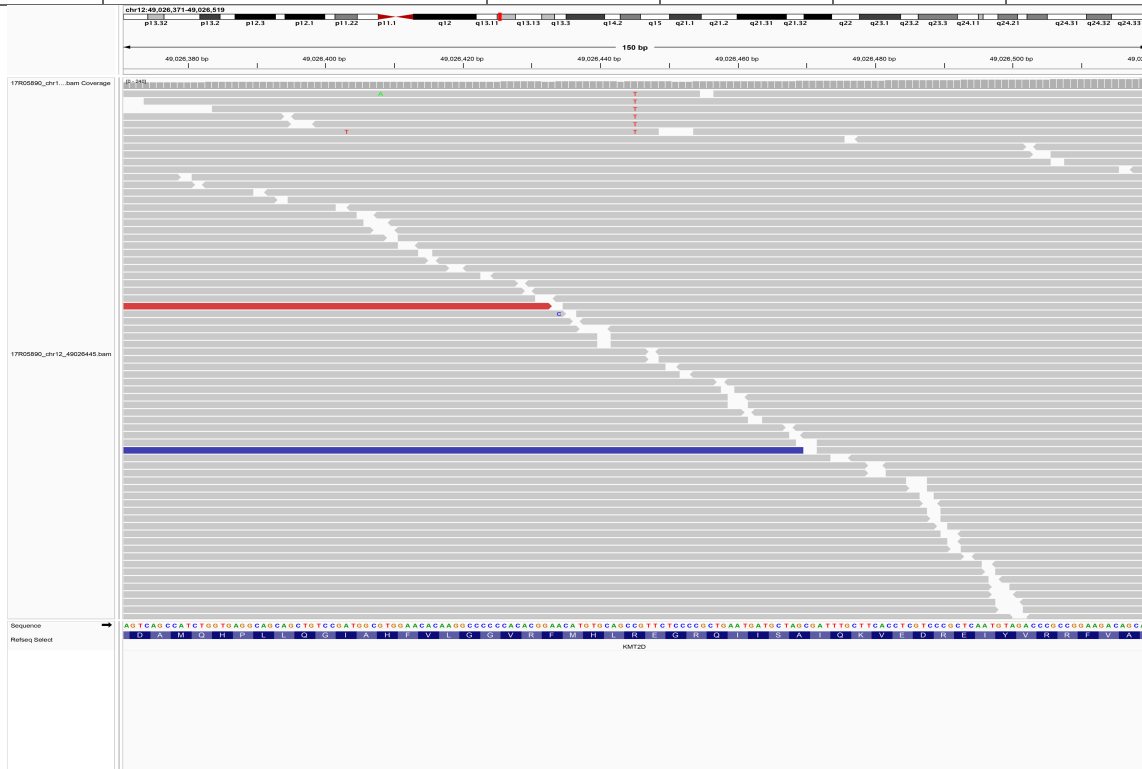

1.6. chr12\_49026588\_G/T

| SampleID | Variants (GRCh38)  | Ref_depth | Alt_depth | Gene         | Consequence      |
|----------|--------------------|-----------|-----------|--------------|------------------|
| 18R19172 | chr12_49026588_G/T | 65        | 4         | <i>KMT2D</i> | missense_variant |

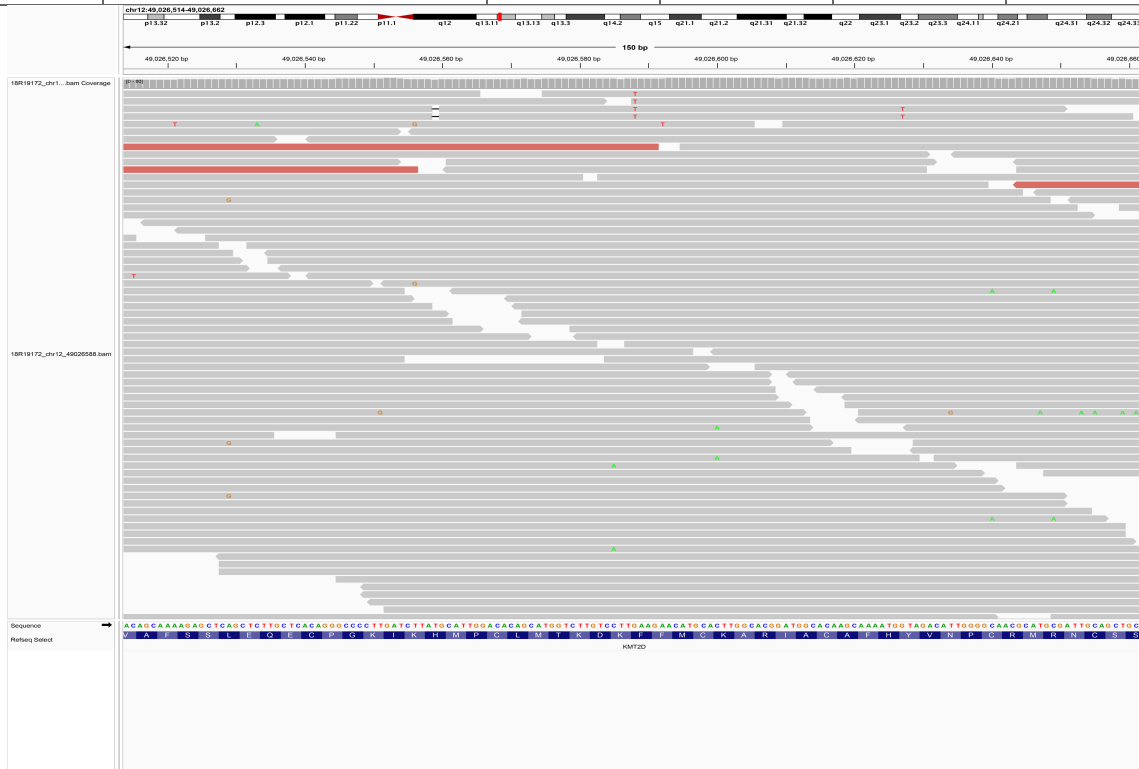

1.7. chr12\_49026644\_G/A

| SampleID   | Variants (GRCh38)  | Ref_depth | Alt_depth | Gene         | Consequence      |
|------------|--------------------|-----------|-----------|--------------|------------------|
| 4331232202 | chr12_49026644_G/A | 39        | 3         | <i>KMT2D</i> | missense_variant |

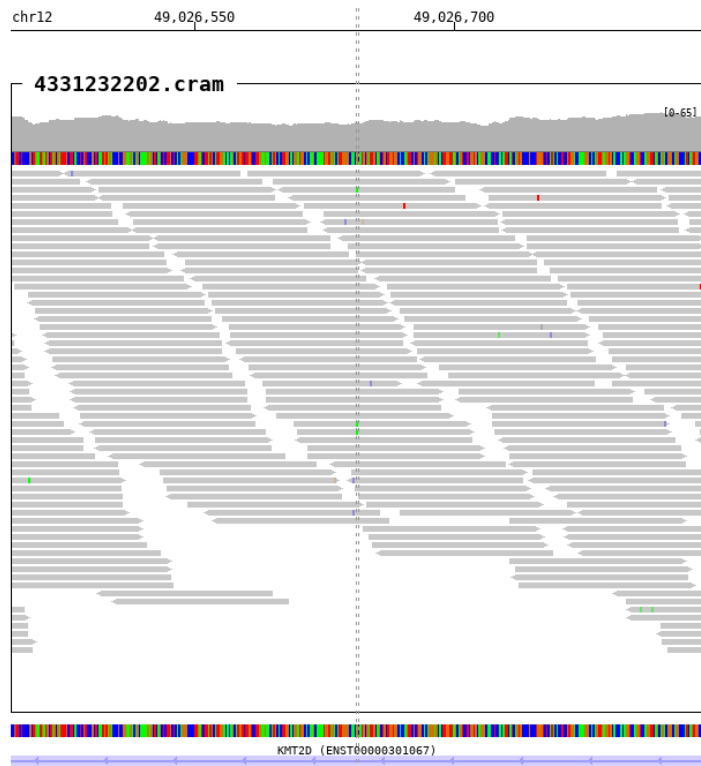

### 1.8. chr12\_49026739\_G/A

| SampleID | Variants (GRCh38)  | Ref_depth | Alt_depth | Gene         | Consequence      |
|----------|--------------------|-----------|-----------|--------------|------------------|
| HD26_76  | chr12_49026739_G/A | 32        | 3         | <i>KMT2D</i> | missense_variant |

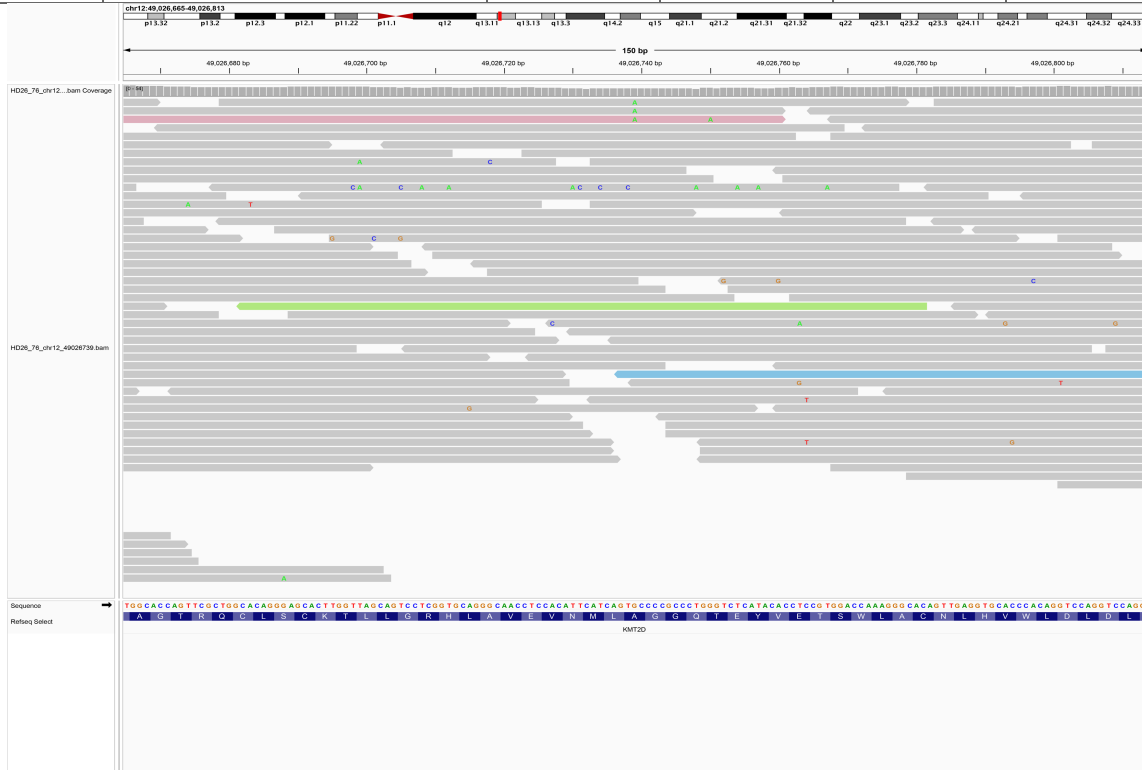

1.9. chr12\_49026758\_A/G

| SampleID | Variants (GRCh38)  | Ref_depth | Alt_depth | Gene         | Consequence      |
|----------|--------------------|-----------|-----------|--------------|------------------|
| 19R23942 | chr12_49026758_A/G | 126       | 4         | <i>KMT2D</i> | missense_variant |

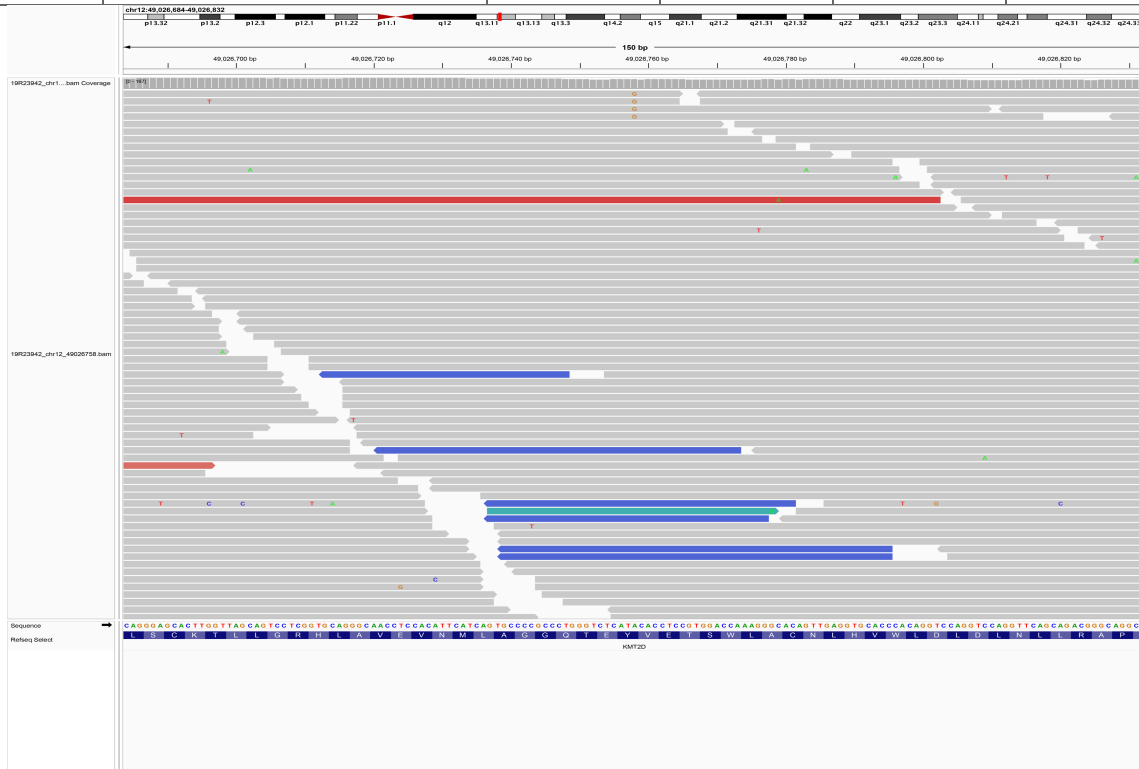

1.10. chr12\_49027021\_C/A

| SampleID | Variants (GRCh38)  | Ref_depth | Alt_depth | Gene  | Consequence      |
|----------|--------------------|-----------|-----------|-------|------------------|
| 18R15076 | chr12_49027021_C/A | 52        | 4         | KMT2D | missense_variant |

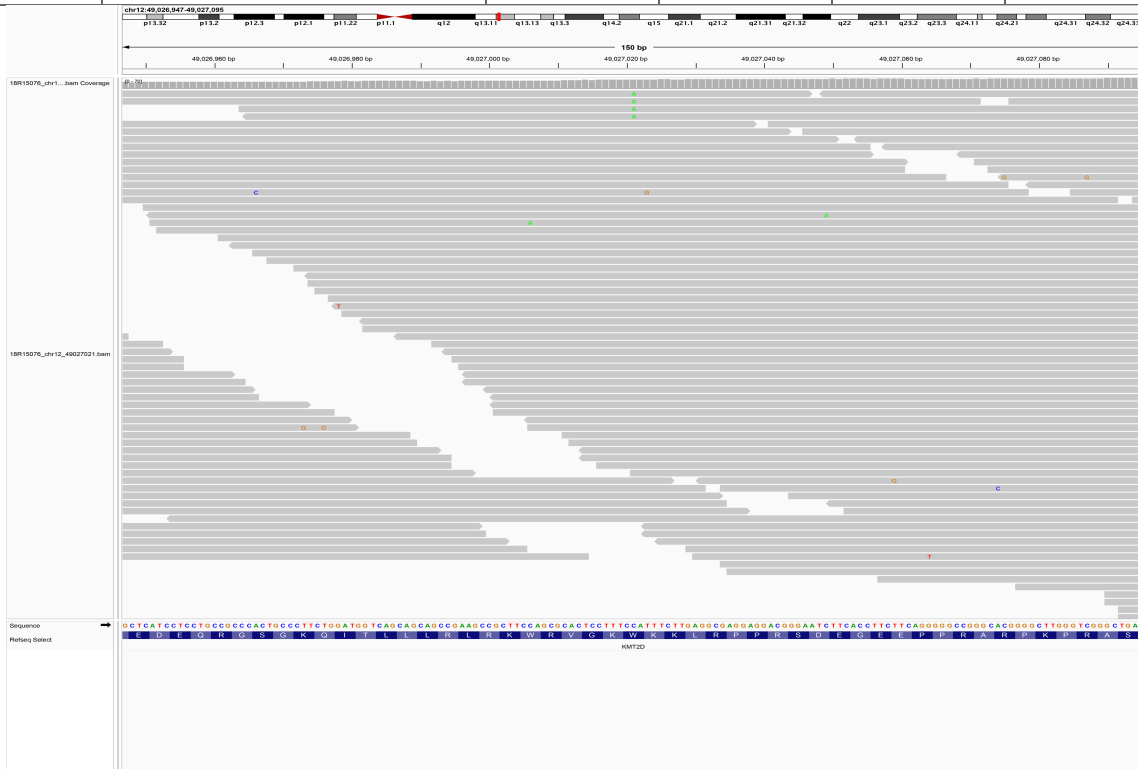

1.11. chr12\_49027220\_G/A

| SampleID | Variants (GRCh38)  | Ref_depth | Alt_depth | Gene  | Consequence      |
|----------|--------------------|-----------|-----------|-------|------------------|
| 19R40419 | chr12_49027220_G/A | 79        | 6         | KMT2D | missense_variant |

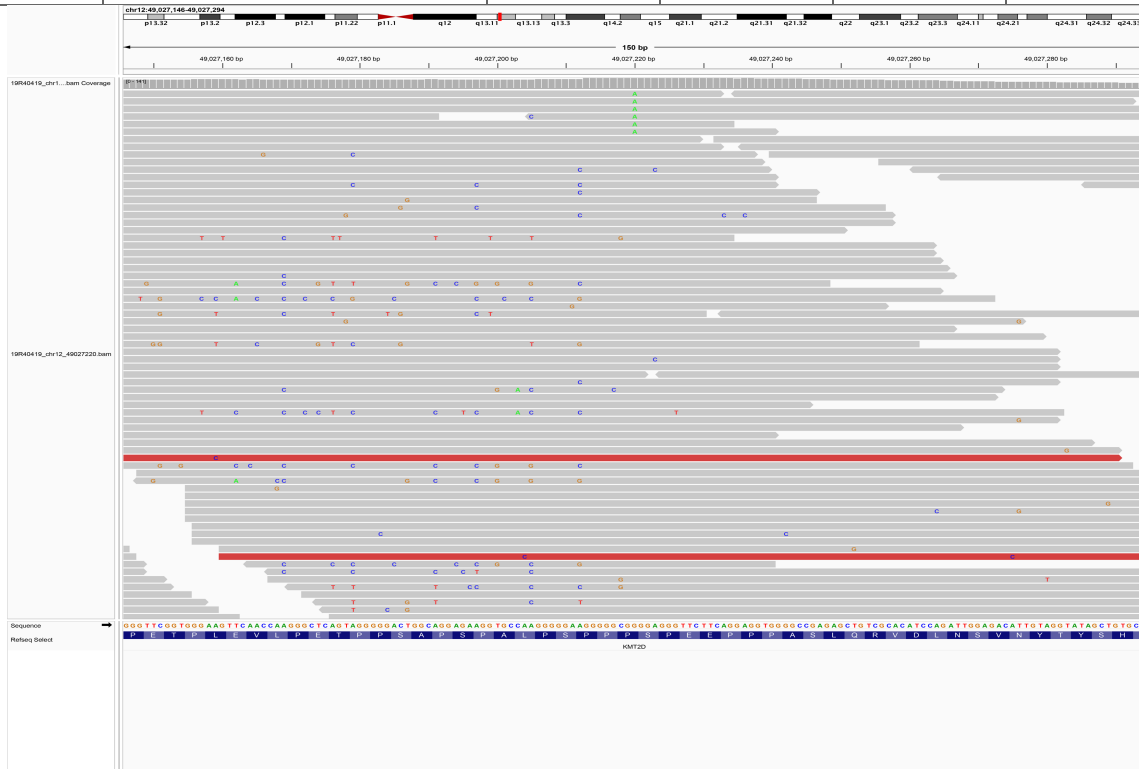

1.12. chr12\_49027847\_A/G

| SampleID          | Variants (GRCh38)  | Ref_depth | Alt_depth | Gene  | Consequence      |
|-------------------|--------------------|-----------|-----------|-------|------------------|
| DP9241118_D0404-1 | chr12_49027847_A/G | 17        | 5         | KMT2D | missense_variant |

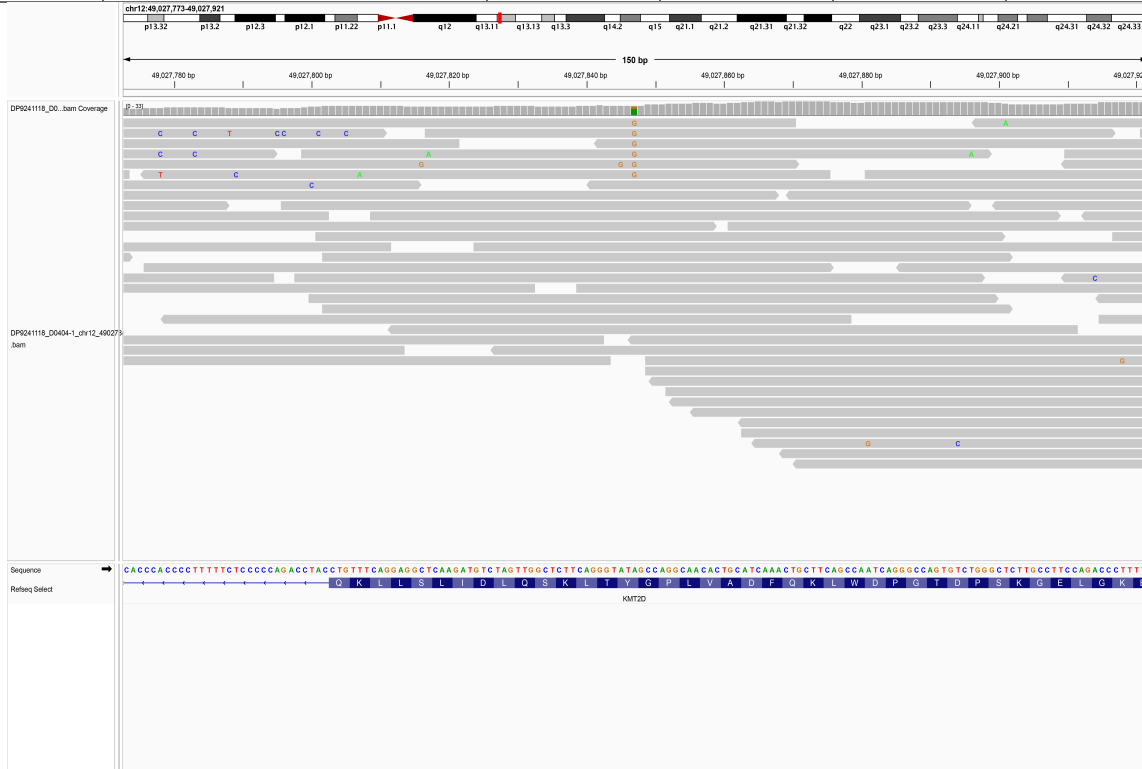

1.13. chr12\_49027862\_C/T

| SampleID | Variants (GRCh38)  | Ref_depth | Alt_depth | Gene  | Consequence      |
|----------|--------------------|-----------|-----------|-------|------------------|
| 18R12753 | chr12_49027862_C/T | 63        | 4         | KMT2D | missense_variant |

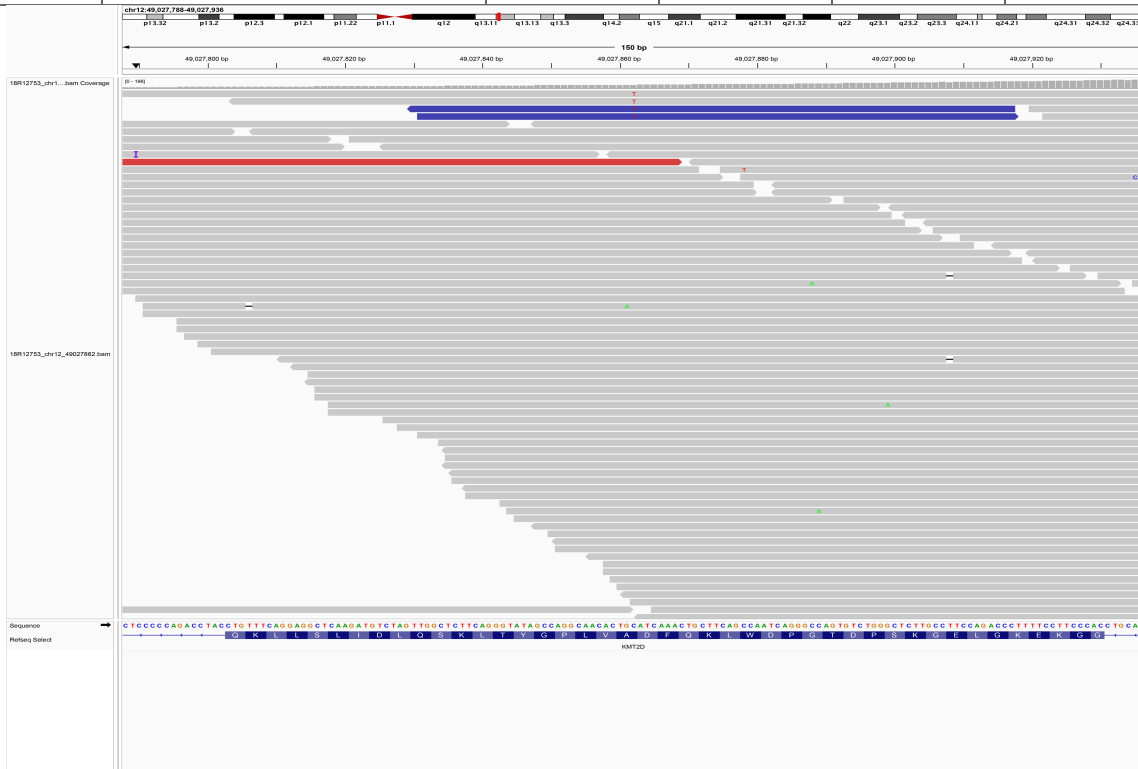

1.14. chr12\_49027886\_G/A

| SampleID | Variants (GRCh38)  | Ref_depth | Alt_depth | Gene  | Consequence      |
|----------|--------------------|-----------|-----------|-------|------------------|
| 17R10227 | chr12_49027886_G/A | 46        | 4         | KMT2D | missense_variant |

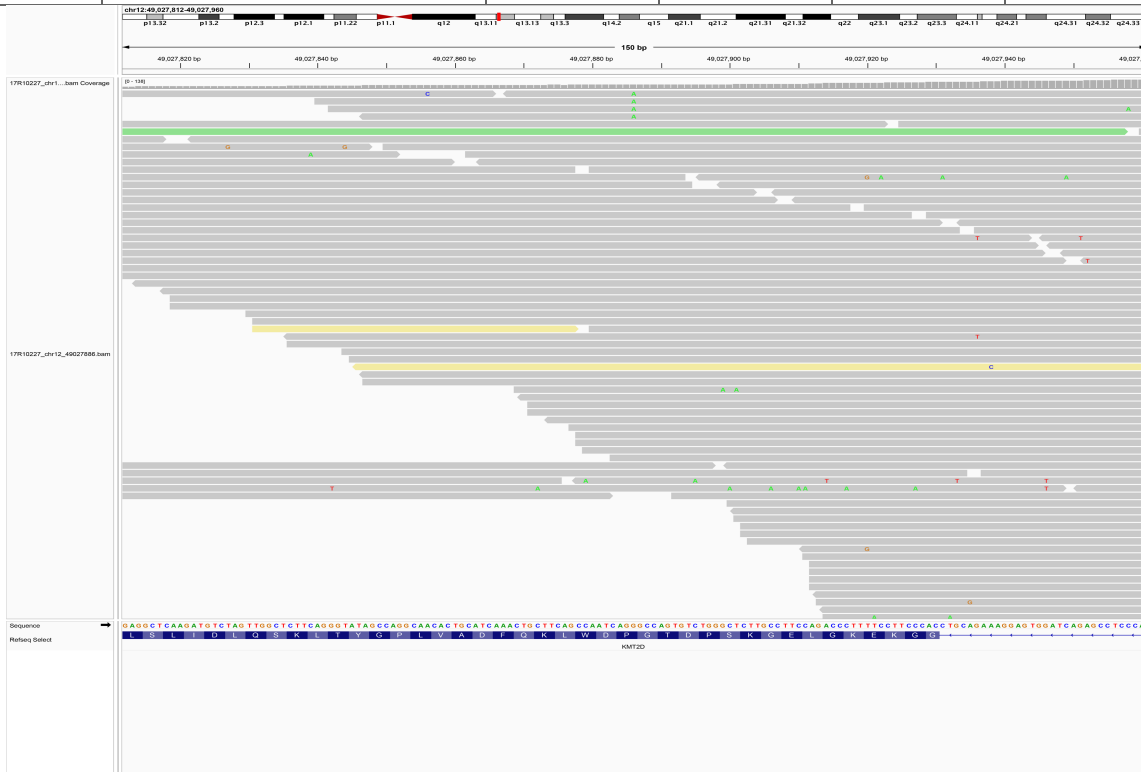

1.15. chr12\_49028036\_G/A

| SampleID | Variants (GRCh38)  | Ref_depth | Alt_depth | Gene  | Consequence      |
|----------|--------------------|-----------|-----------|-------|------------------|
| 18R09435 | chr12_49028036_G/A | 158       | 4         | KMT2D | missense_variant |

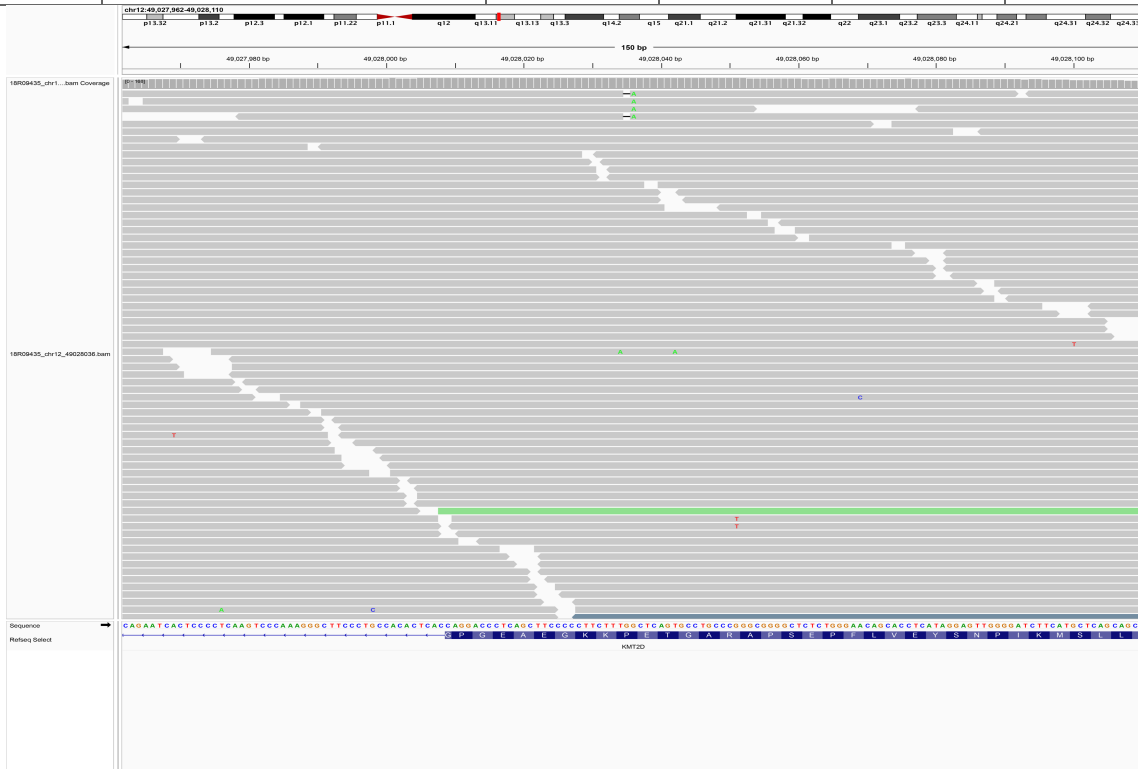

1.16. chr12\_49028883\_T/C

| SampleID          | Variants (GRCh38)  | Ref_depth | Alt_depth | Gene  | Consequence      |
|-------------------|--------------------|-----------|-----------|-------|------------------|
| AAGC25060<br>981D | chr12_49028883_T/C | 58        | 4         | KMT2D | missense_variant |

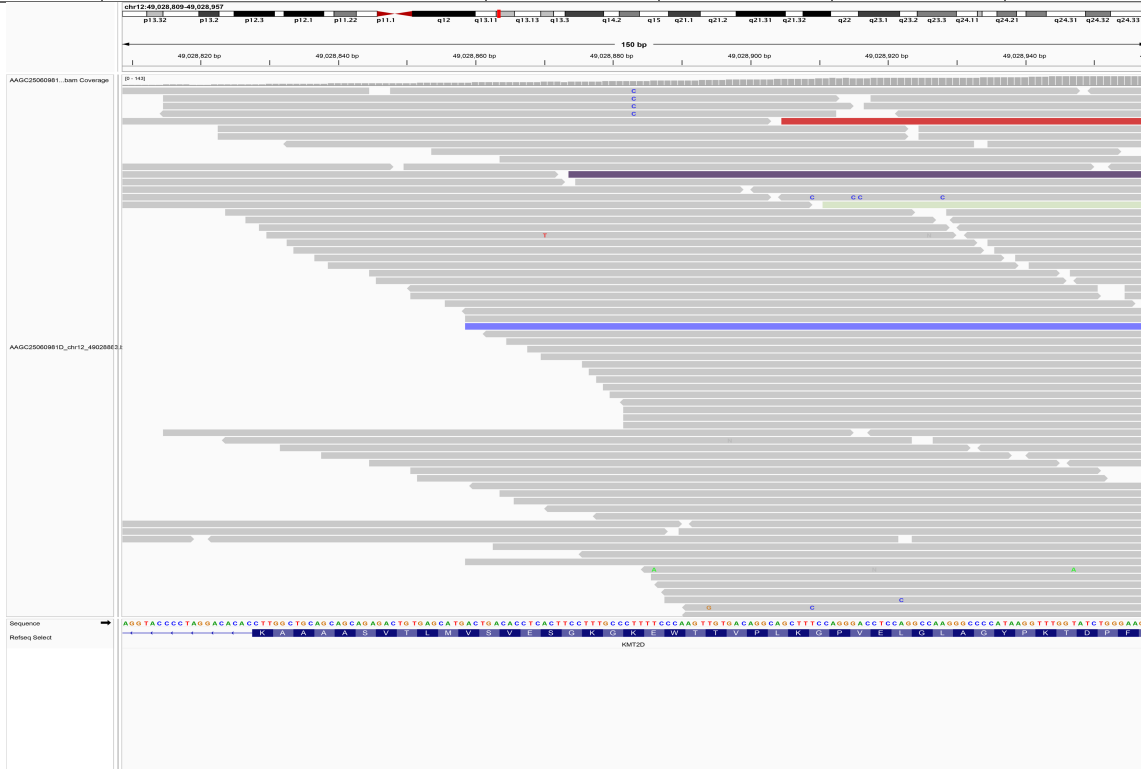

1.17. chr12\_49028929\_G/T

| SampleID | Variants (GRCh38)  | Ref_depth | Alt_depth | Gene  | Consequence      |
|----------|--------------------|-----------|-----------|-------|------------------|
| 18R12743 | chr12_49028929_G/T | 39        | 4         | KMT2D | missense_variant |

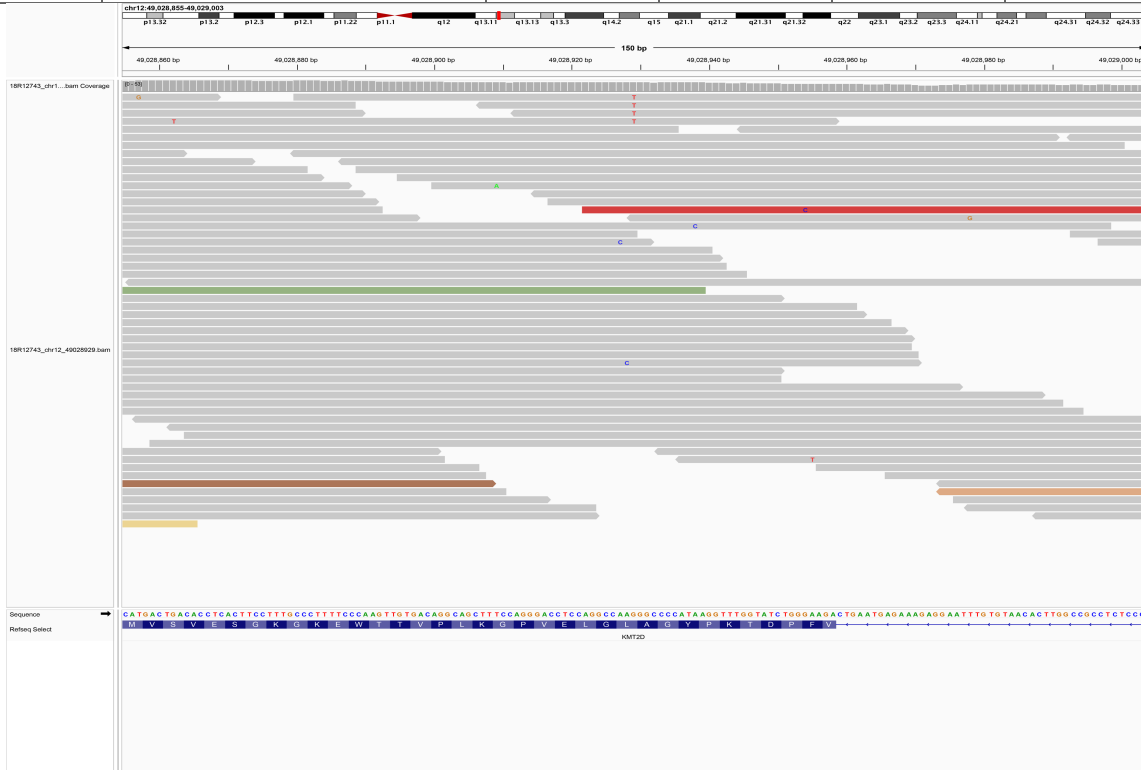

1.18. chr12\_49029126\_C/T

| SampleID | Variants (GRCh38)  | Ref_depth | Alt_depth | Gene         | Consequence      |
|----------|--------------------|-----------|-----------|--------------|------------------|
| 19R23820 | chr12_49029126_C/T | 54        | 13        | <i>KMT2D</i> | missense_variant |

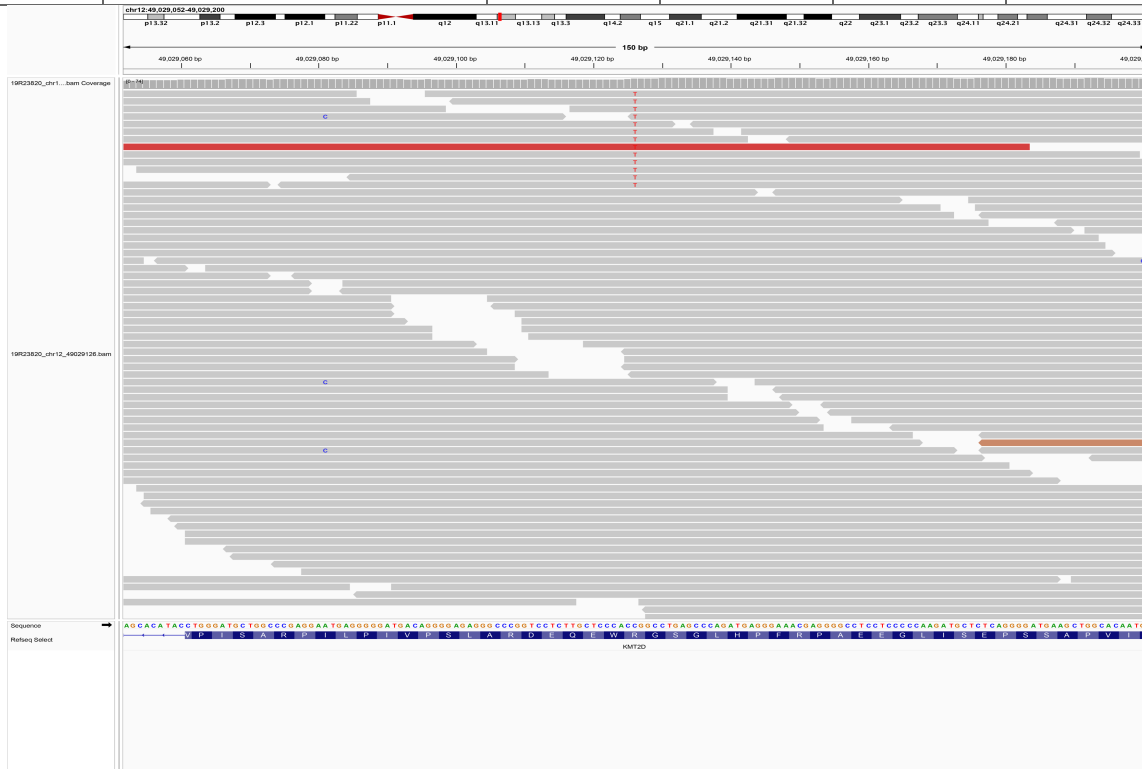

1.19. chr12\_49029153\_G/A

| SampleID           | Variants (GRCh38)  | Ref_depth | Alt_depth | Gene  | Consequence      |
|--------------------|--------------------|-----------|-----------|-------|------------------|
| 01200527V033<br>33 | chr12_49029153_G/A | 20        | 6         | KMT2D | missense_variant |

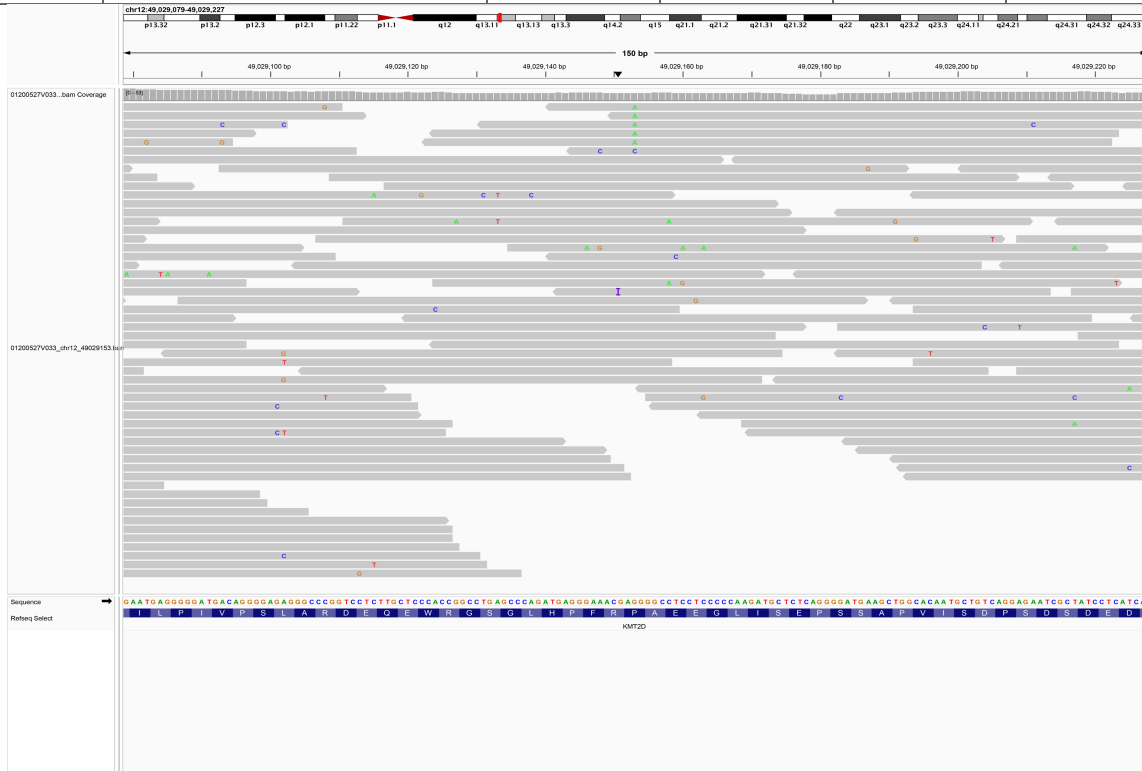

1.20. chr12\_49029153\_G/T

| SampleID        | Variants (GRCh38)  | Ref_depth | Alt_depth | Gene  | Consequence      |
|-----------------|--------------------|-----------|-----------|-------|------------------|
| 18HanNN08<br>71 | chr12_49029153_G/T | 43        | 6         | KMT2D | missense_variant |

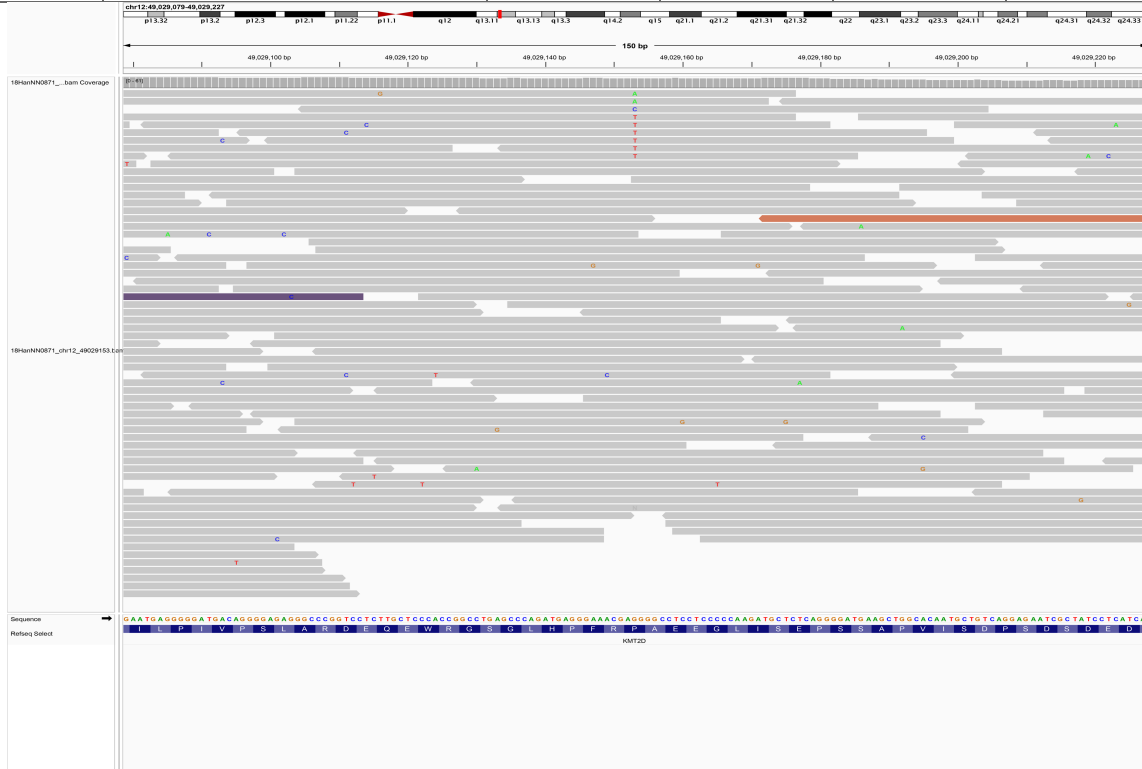

1.21. chr12\_49029207\_G/A

| SampleID | Variants (GRCh38)  | Ref_depth | Alt_depth | Gene  | Consequence      |
|----------|--------------------|-----------|-----------|-------|------------------|
| 17R05513 | chr12_49029207_G/A | 79        | 4         | KMT2D | missense_variant |

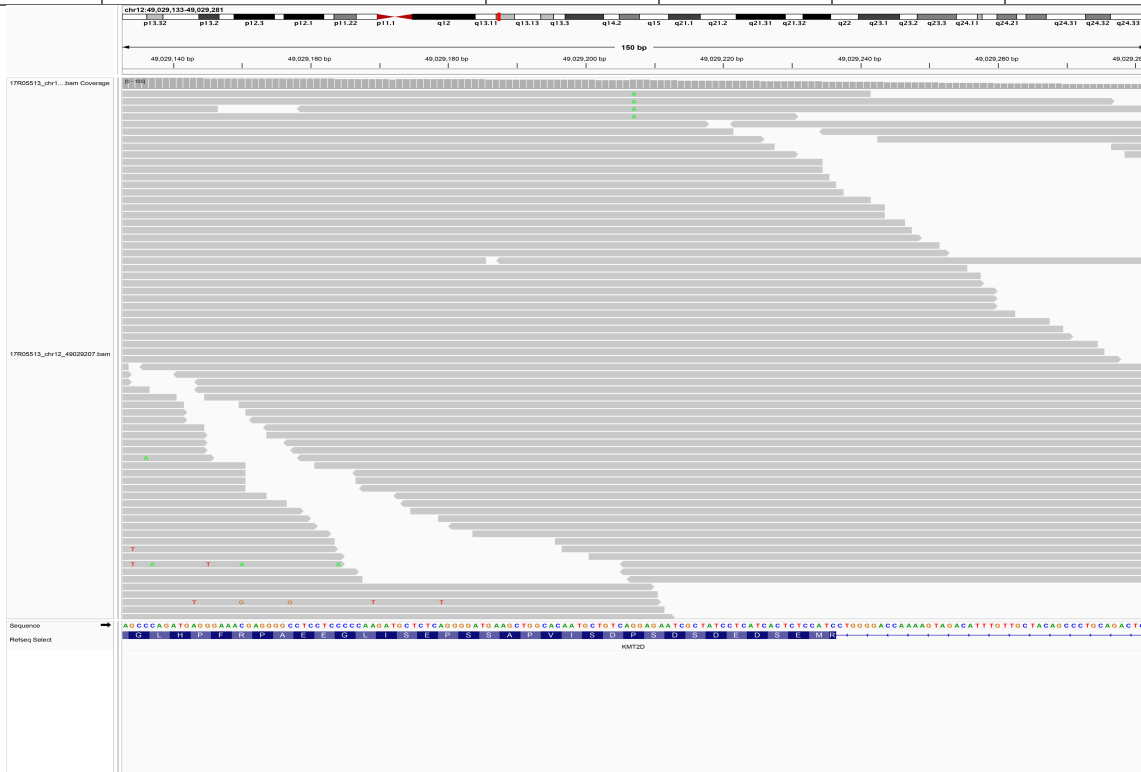

1.22. chr12\_49030617\_G/T

| SampleID | Variants (GRCh38)  | Ref_depth | Alt_depth | Gene  | Consequence      |
|----------|--------------------|-----------|-----------|-------|------------------|
| 18R09411 | chr12_49030617_G/T | 29        | 4         | KMT2D | missense_variant |

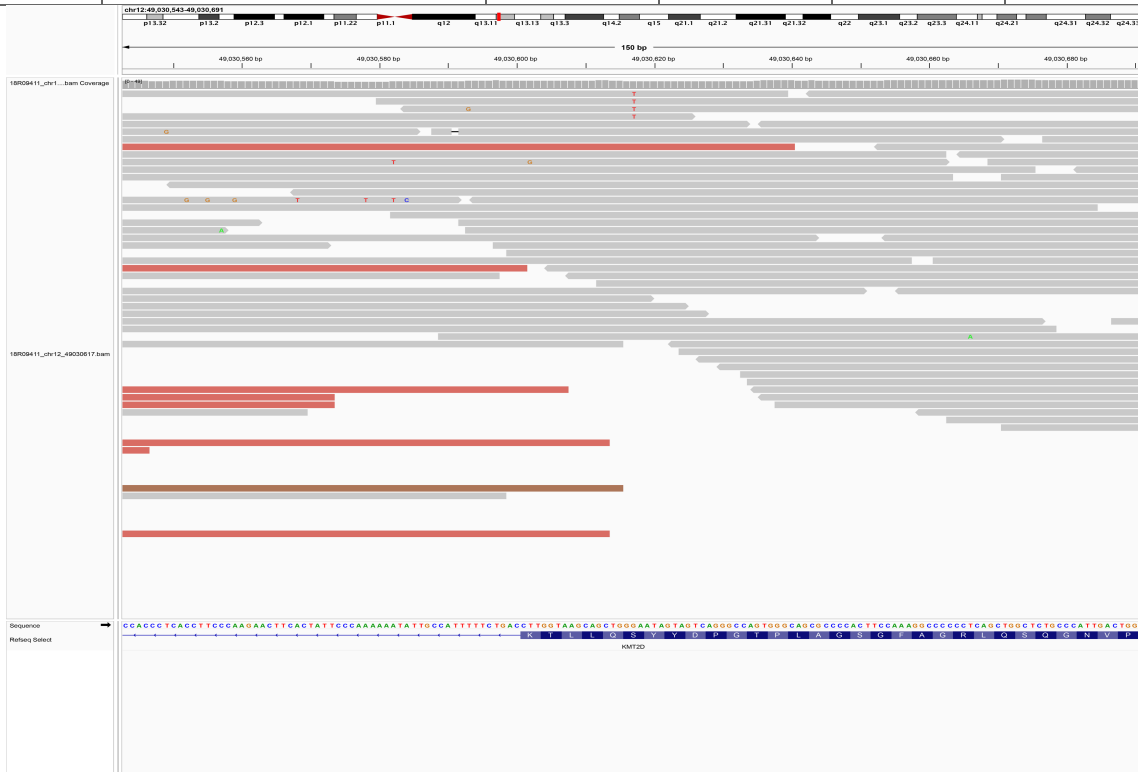

1.23. chr12\_49030729\_C/T

| SampleID | Variants (GRCh38)  | Ref_depth | Alt_depth | Gene  | Consequence      |
|----------|--------------------|-----------|-----------|-------|------------------|
| 18R09112 | chr12_49030729_C/T | 43        | 4         | KMT2D | missense_variant |

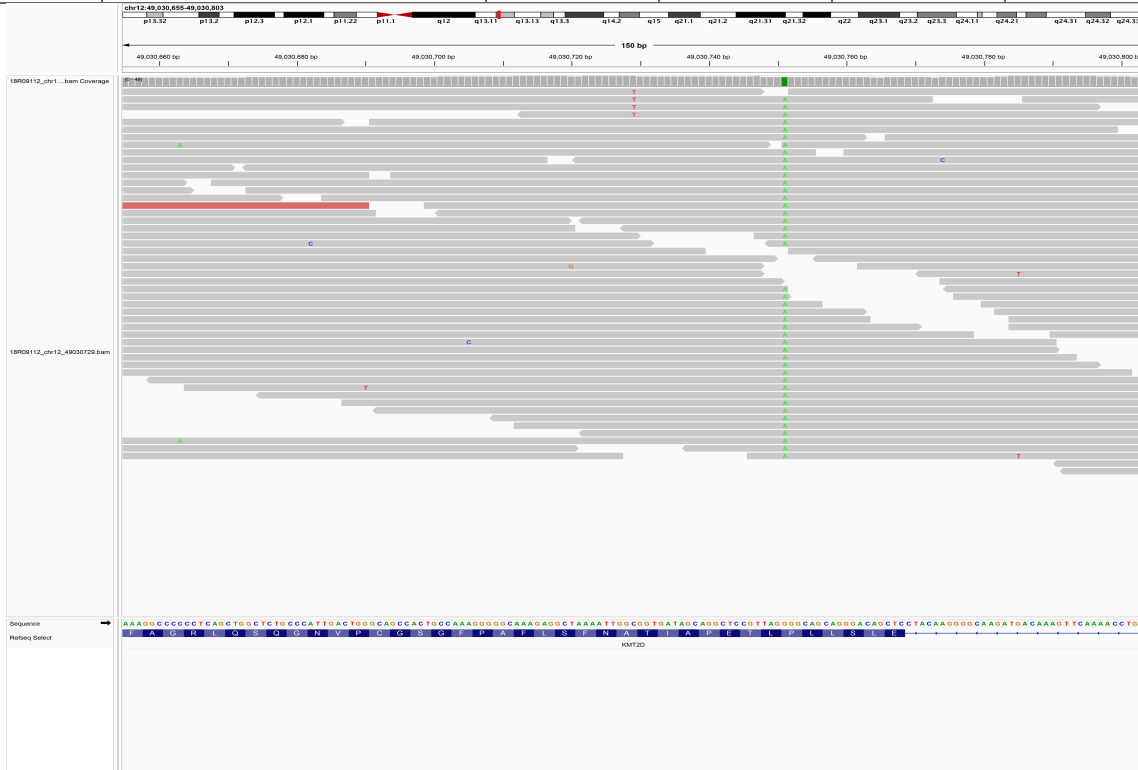

1.24. chr12\_49030953\_C/A

| SampleID | Variants (GRCh38)  | Ref_depth | Alt_depth | Gene  | Consequence      |
|----------|--------------------|-----------|-----------|-------|------------------|
| 18R12960 | chr12_49030953_C/A | 52        | 4         | KMT2D | missense_variant |

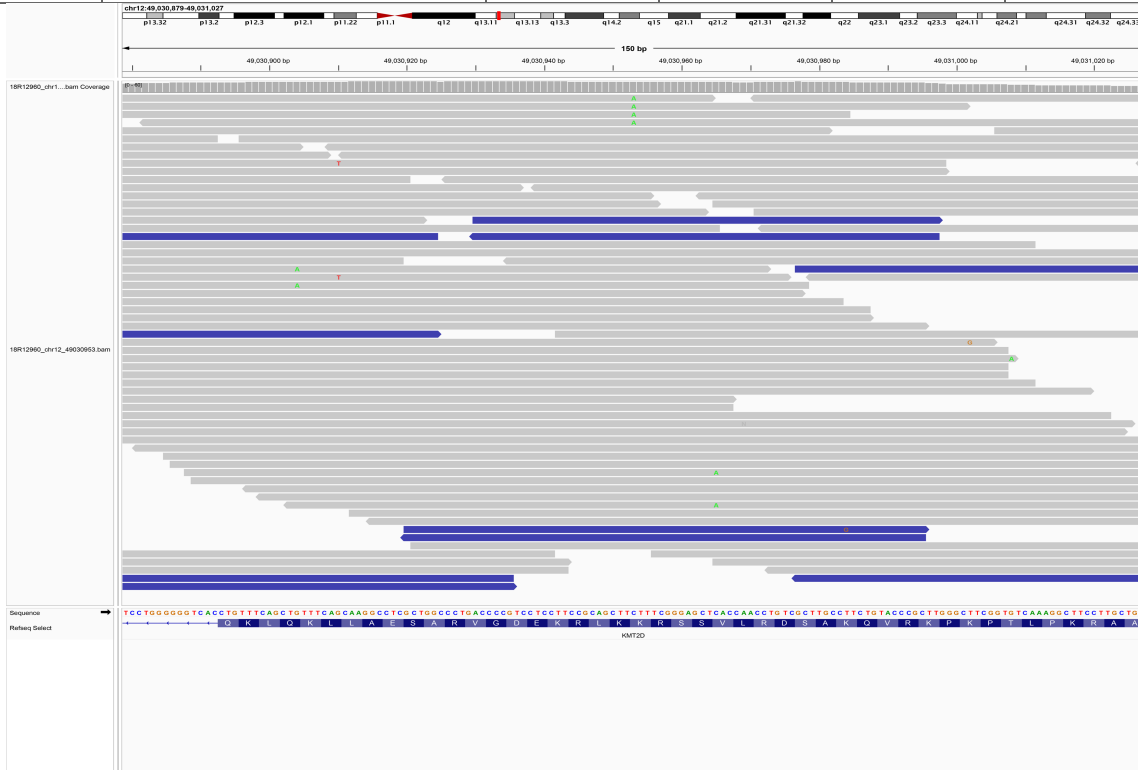

1.25. chr12\_49030979\_T/C

| SampleID | Variants (GRCh38)  | Ref_depth | Alt_depth | Gene  | Consequence      |
|----------|--------------------|-----------|-----------|-------|------------------|
| 19R23543 | chr12_49030979_T/C | 66        | 30        | KMT2D | missense_variant |

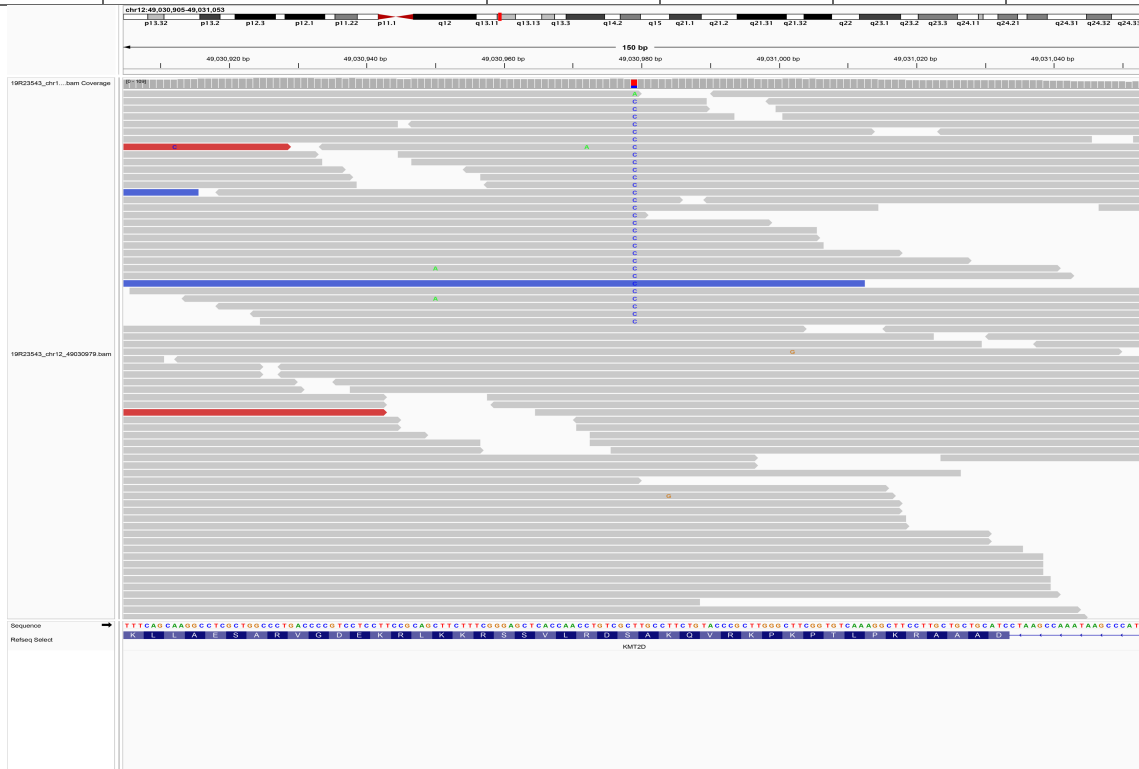

1.26. chr12\_49031291\_C/T

| SampleID | Variants (GRCh38)  | Ref_depth | Alt_depth | Gene  | Consequence      |
|----------|--------------------|-----------|-----------|-------|------------------|
| 18R10737 | chr12_49031291_C/T | 48        | 4         | KMT2D | missense_variant |

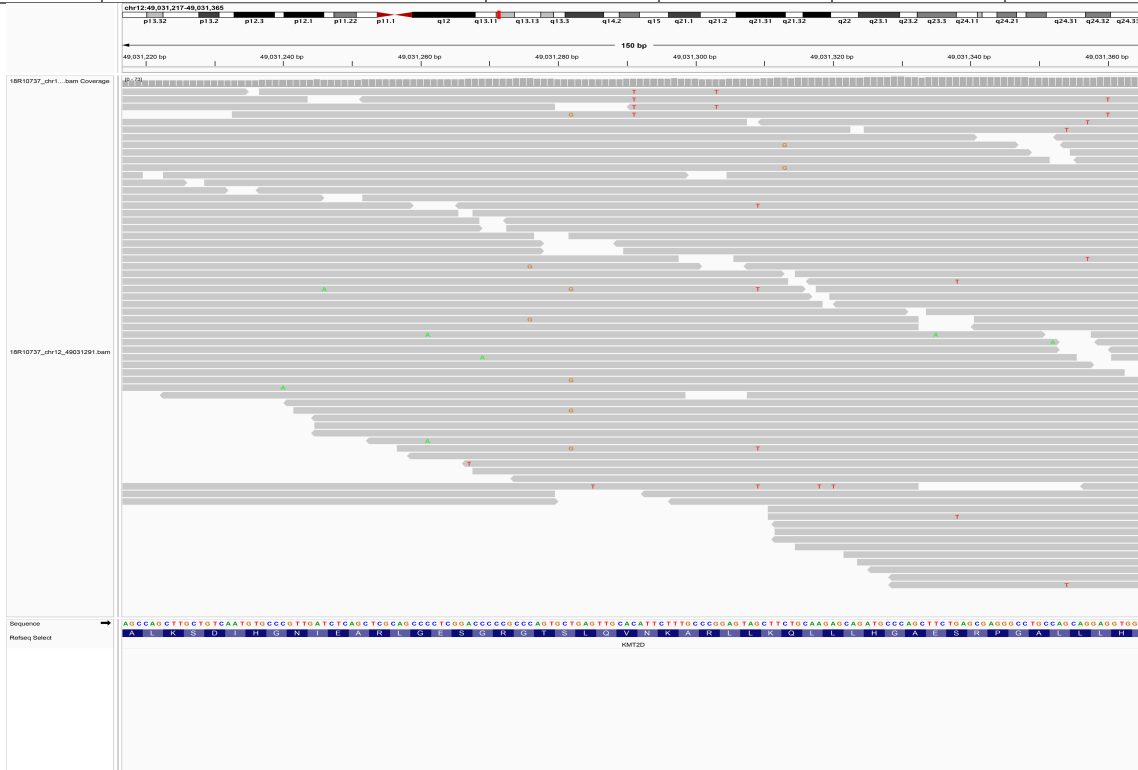

1.27. chr12\_49031447\_G/A

| SampleID        | Variants (GRCh38)  | Ref_depth | Alt_depth | Gene         | Consequence      |
|-----------------|--------------------|-----------|-----------|--------------|------------------|
| AAGC03312<br>9C | chr12_49031447_G/A | 75        | 35        | <i>KMT2D</i> | missense_variant |

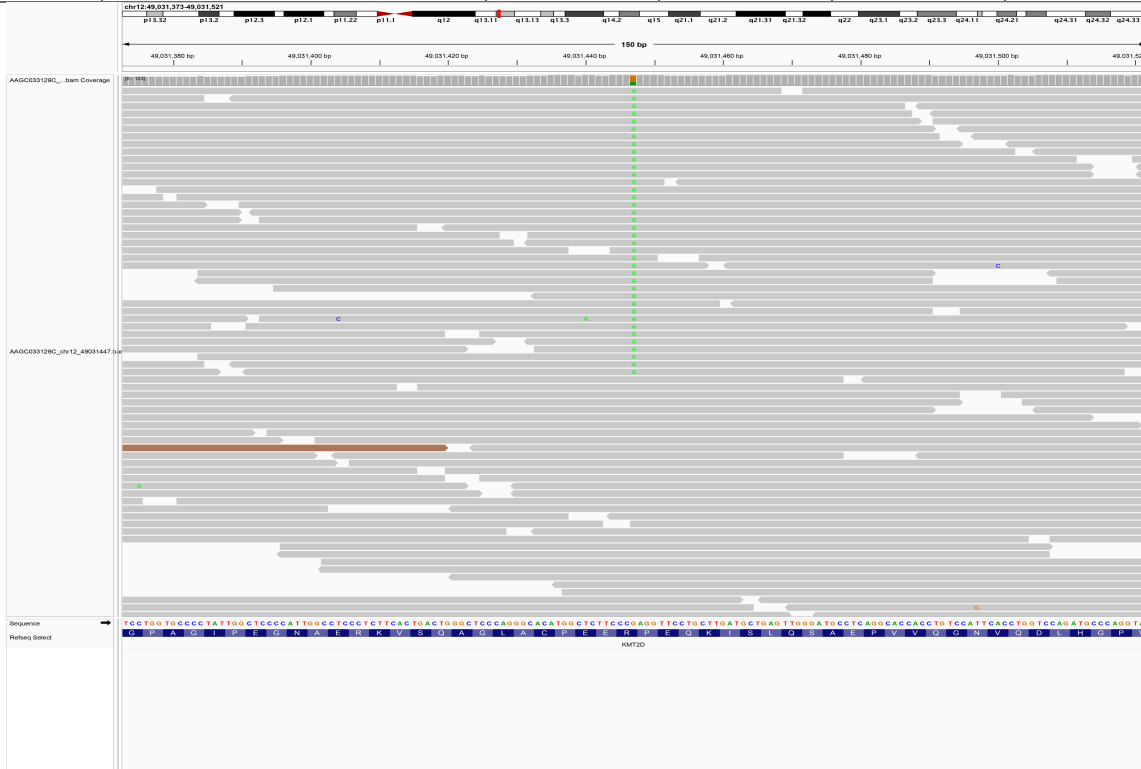

1.28. chr12\_49031634\_C/G

| SampleID | Variants (GRCh38)  | Ref_depth | Alt_depth | Gene  | Consequence      |
|----------|--------------------|-----------|-----------|-------|------------------|
| 18R15076 | chr12_49031634_C/G | 47        | 3         | KMT2D | missense_variant |

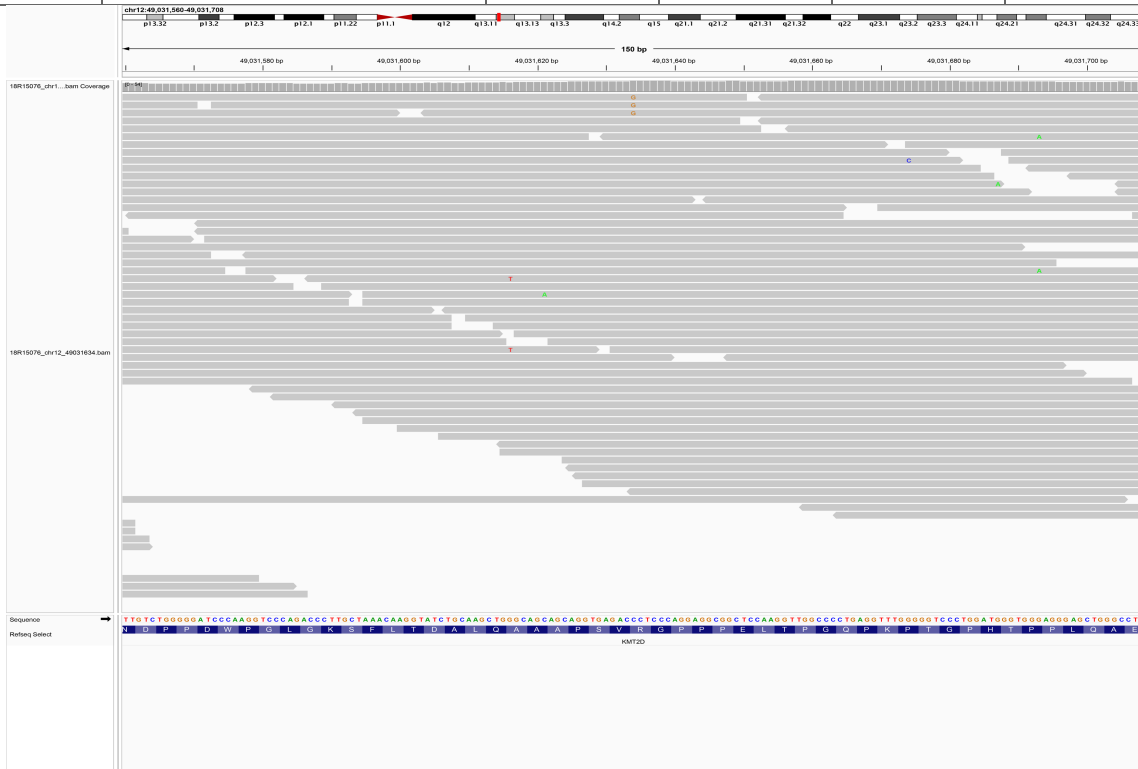



1.30. chr12\_49031998\_G/A

| SampleID | Variants (GRCh38)  | Ref_depth | Alt_depth | Gene  | Consequence      |
|----------|--------------------|-----------|-----------|-------|------------------|
| 19R23979 | chr12_49031998_G/A | 44        | 3         | KMT2D | missense_variant |

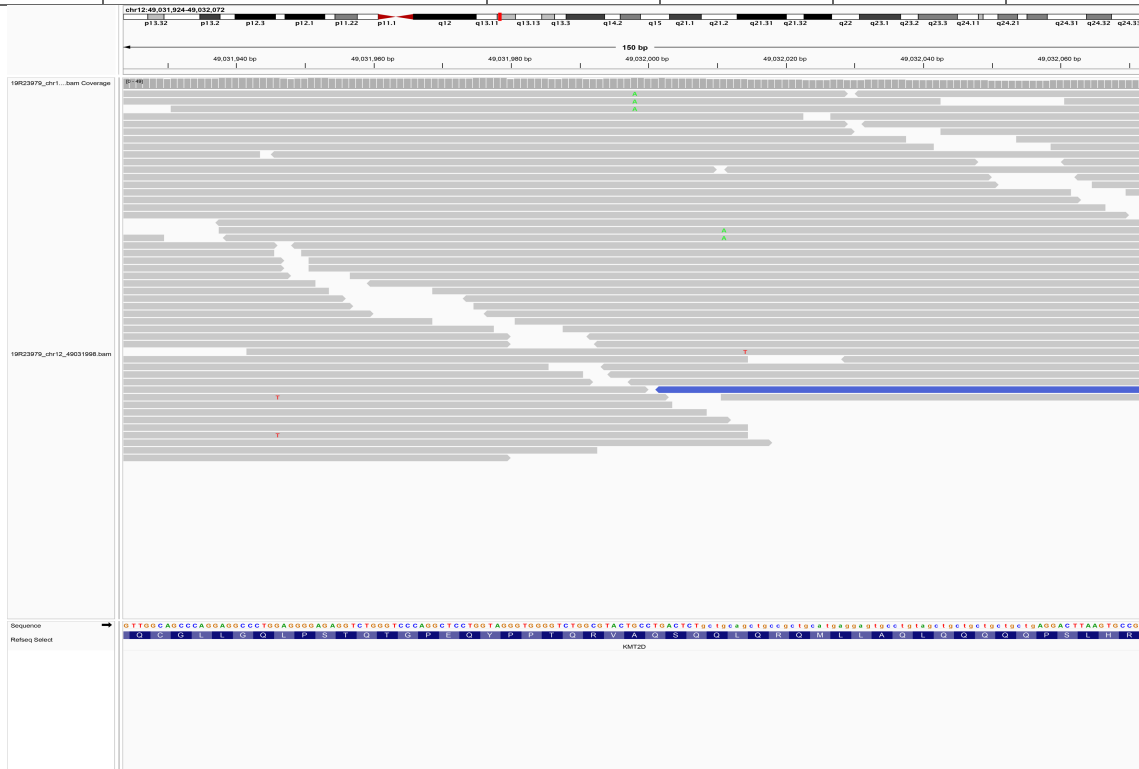

1.31. chr12\_49032139\_C/G

| SampleID | Variants (GRCh38)  | Ref_depth | Alt_depth | Gene  | Consequence      |
|----------|--------------------|-----------|-----------|-------|------------------|
| 18R09316 | chr12_49032139_C/G | 63        | 27        | KMT2D | missense_variant |

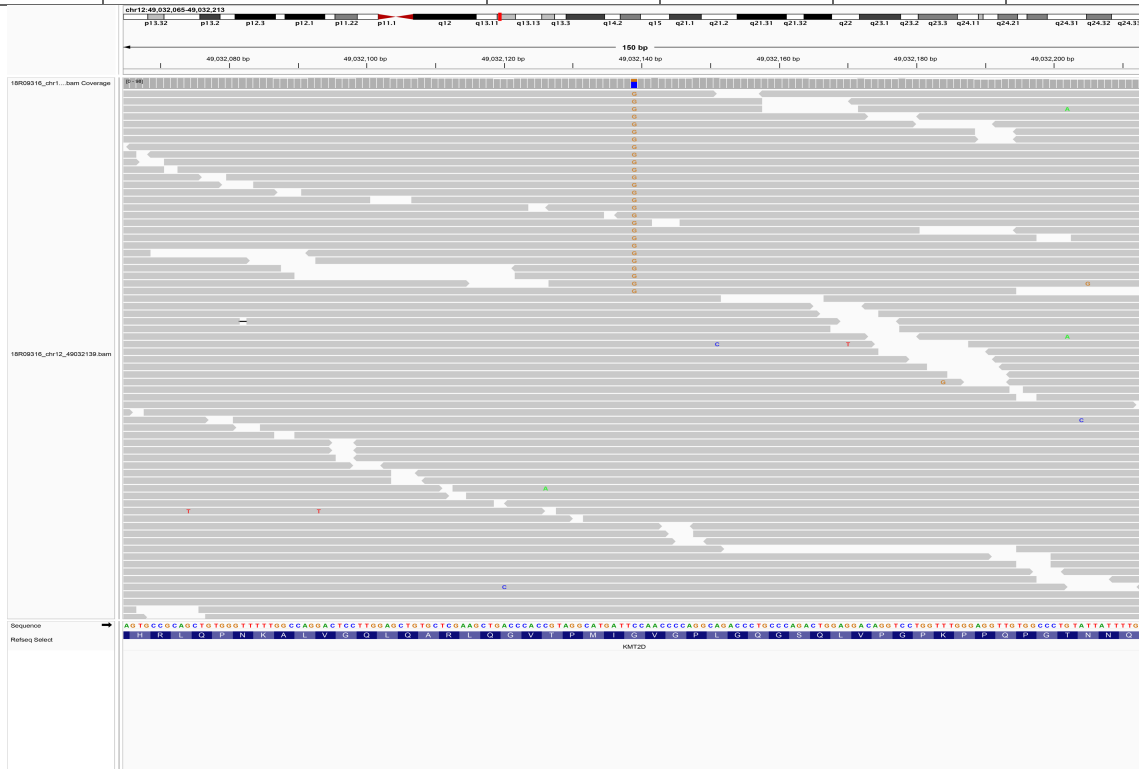

1.32. chr12\_49032140\_C/T

| SampleID | Variants (GRCh38)  | Ref_depth | Alt_depth | Gene         | Consequence      |
|----------|--------------------|-----------|-----------|--------------|------------------|
| 65487    | chr12_49032140_C/T | 27        | 11        | <i>KMT2D</i> | missense_variant |

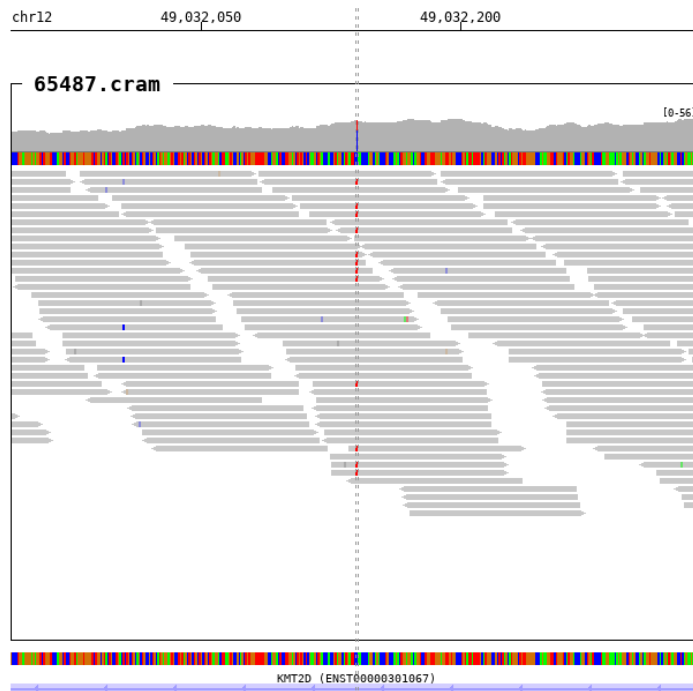

1.33. chr12\_49032176\_G/T

| SampleID | Variants (GRCh38)  | Ref_depth | Alt_depth | Gene  | Consequence      |
|----------|--------------------|-----------|-----------|-------|------------------|
| 18R19168 | chr12_49032176_G/T | 54        | 4         | KMT2D | missense_variant |

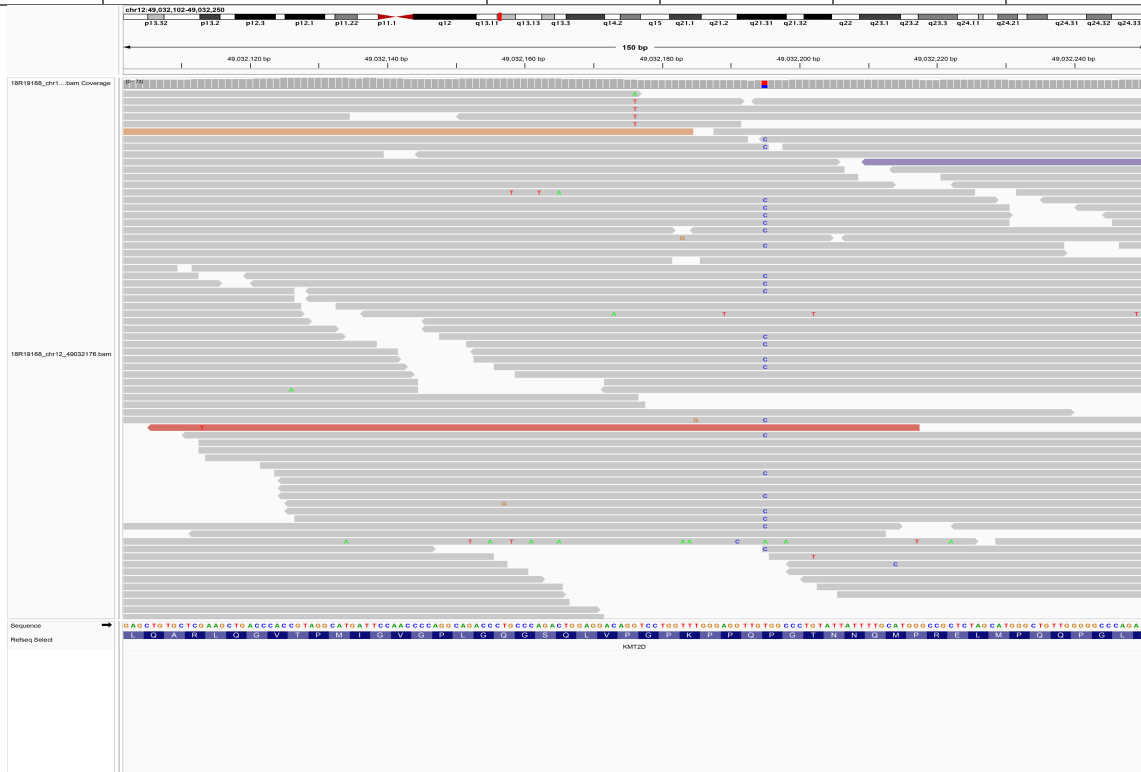

1.34. chr12\_49032183\_T/G

| SampleID | Variants (GRCh38)  | Ref_depth | Alt_depth | Gene  | Consequence      |
|----------|--------------------|-----------|-----------|-------|------------------|
| 18R03425 | chr12_49032183_T/G | 94        | 3         | KMT2D | missense_variant |

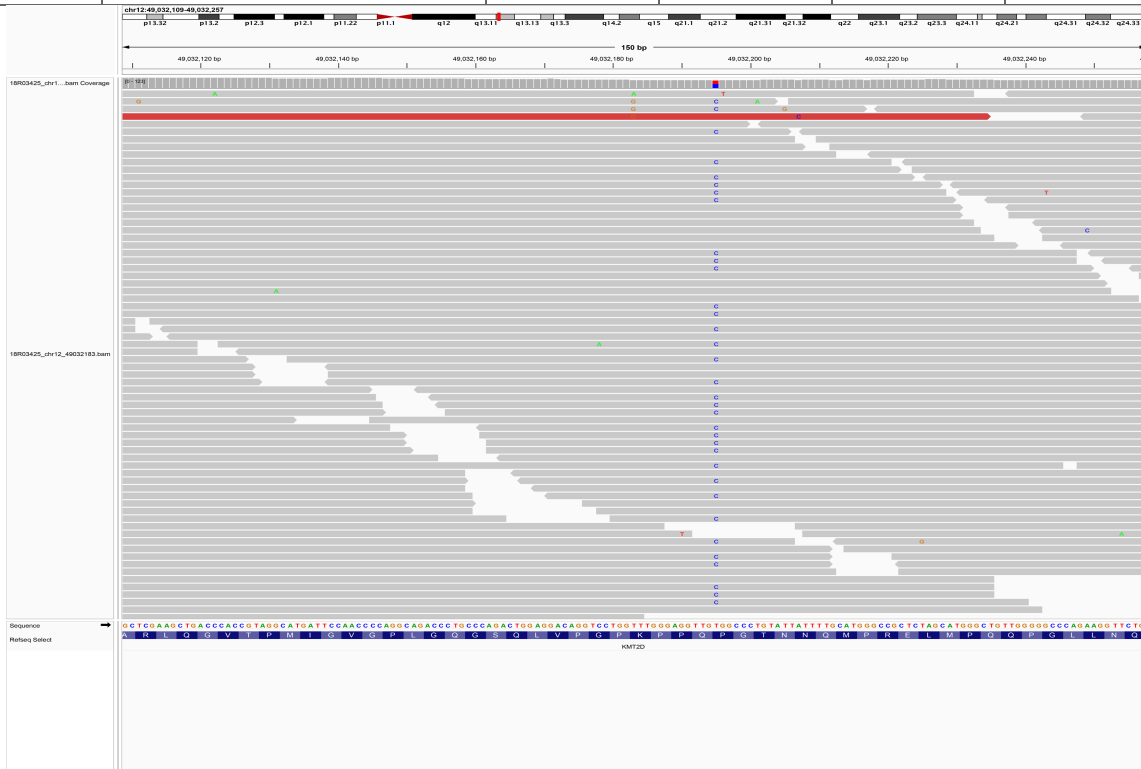

1.35. chr12\_49032429\_C/G

| SampleID | Variants (GRCh38)  | Ref_depth | Alt_depth | Gene         | Consequence      |
|----------|--------------------|-----------|-----------|--------------|------------------|
| 11110292 | chr12_49032429_C/G | 24        | 5         | <i>KMT2D</i> | missense_variant |

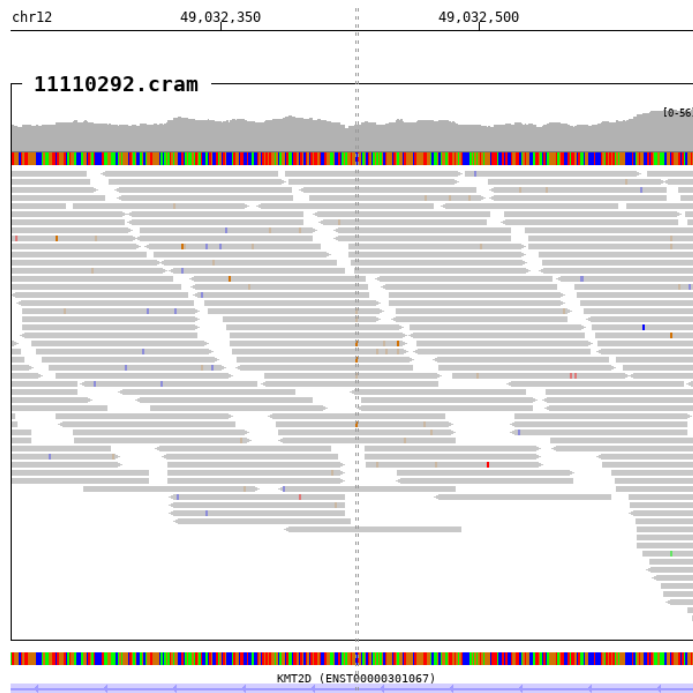

1.36. chr12\_49032795\_C/A

| SampleID | Variants (GRCh38)  | Ref_depth | Alt_depth | Gene         | Consequence      |
|----------|--------------------|-----------|-----------|--------------|------------------|
| 18R12963 | chr12_49032795_C/A | 29        | 3         | <i>KMT2D</i> | missense_variant |

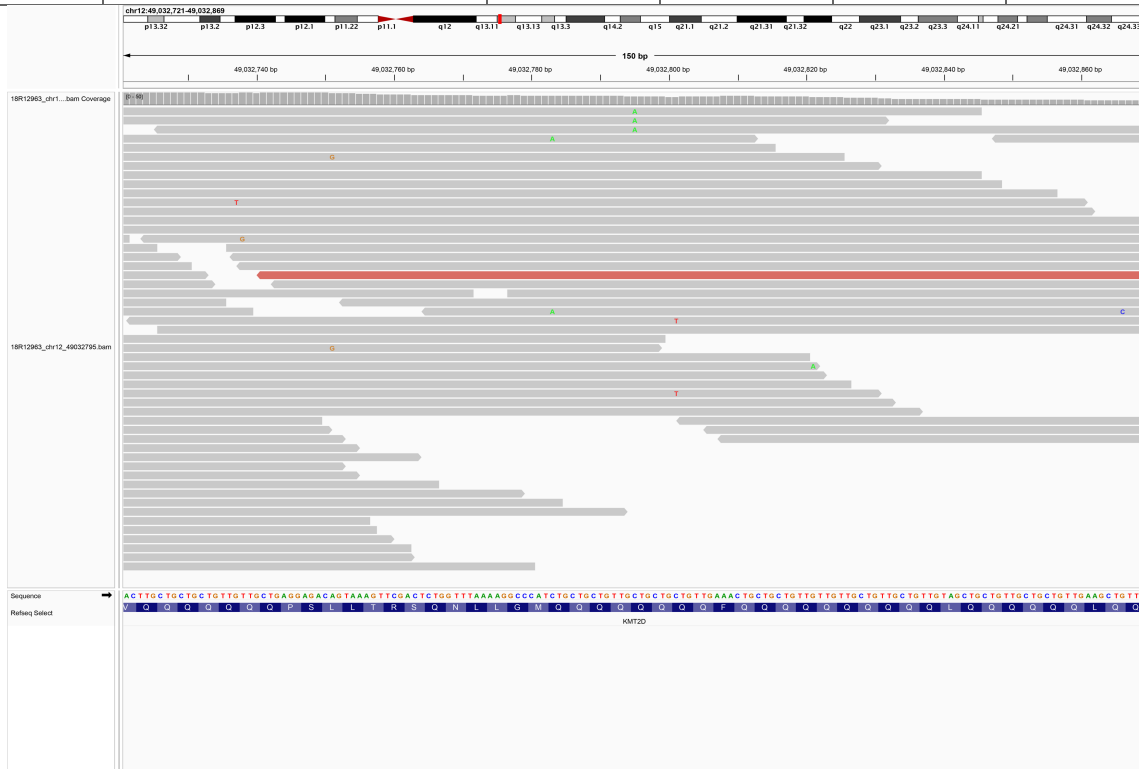



1.38. chr12\_49032991\_T/A

| SampleID      | Variants (GRCh38)  | Ref_depth | Alt_depth | Gene  | Consequence      |
|---------------|--------------------|-----------|-----------|-------|------------------|
| 18R03428      | chr12_49032991_T/A | 32        | 4         | KMT2D | missense_variant |
| 19R23830      | chr12_49032991_T/A | 22        | 3         | KMT2D | missense_variant |
| AAGC25061279D | chr12_49032991_T/A | 37        | 3         | KMT2D | missense_variant |

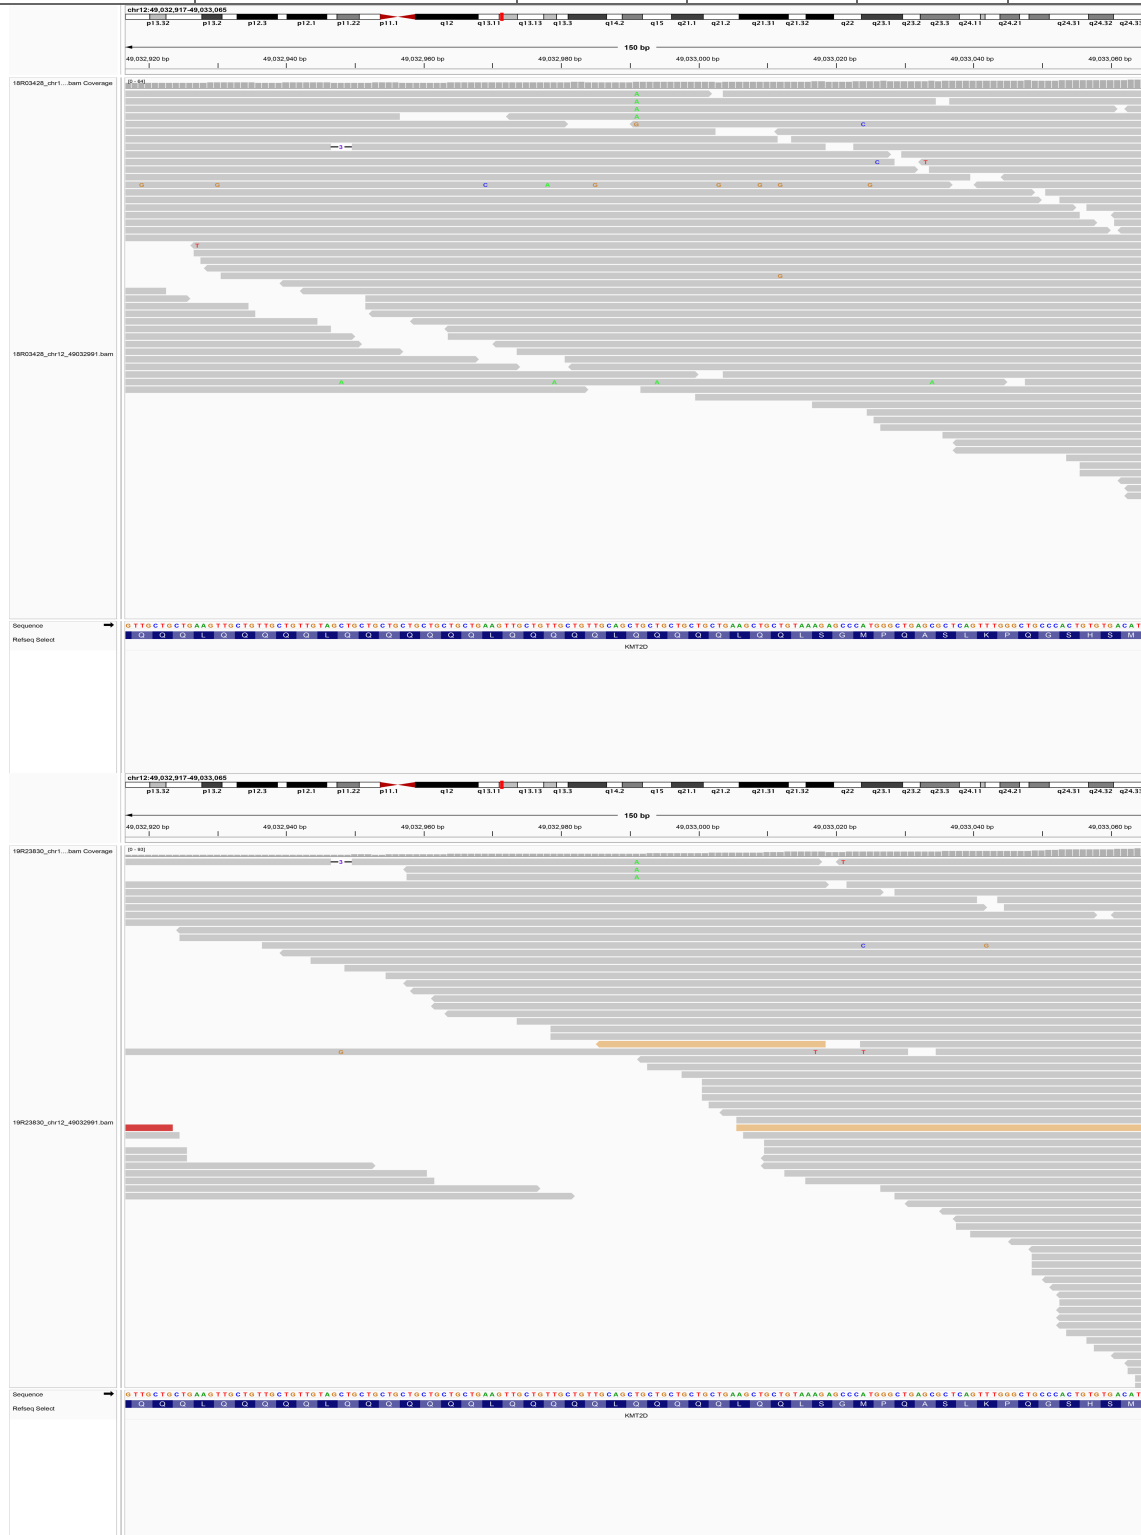



1.39. chr12\_49033064\_T/C

| SampleID | Variants (GRCh38)  | Ref_depth | Alt_depth | Gene         | Consequence      |
|----------|--------------------|-----------|-----------|--------------|------------------|
| 19R23917 | chr12_49033064_T/C | 60        | 3         | <i>KMT2D</i> | missense_variant |

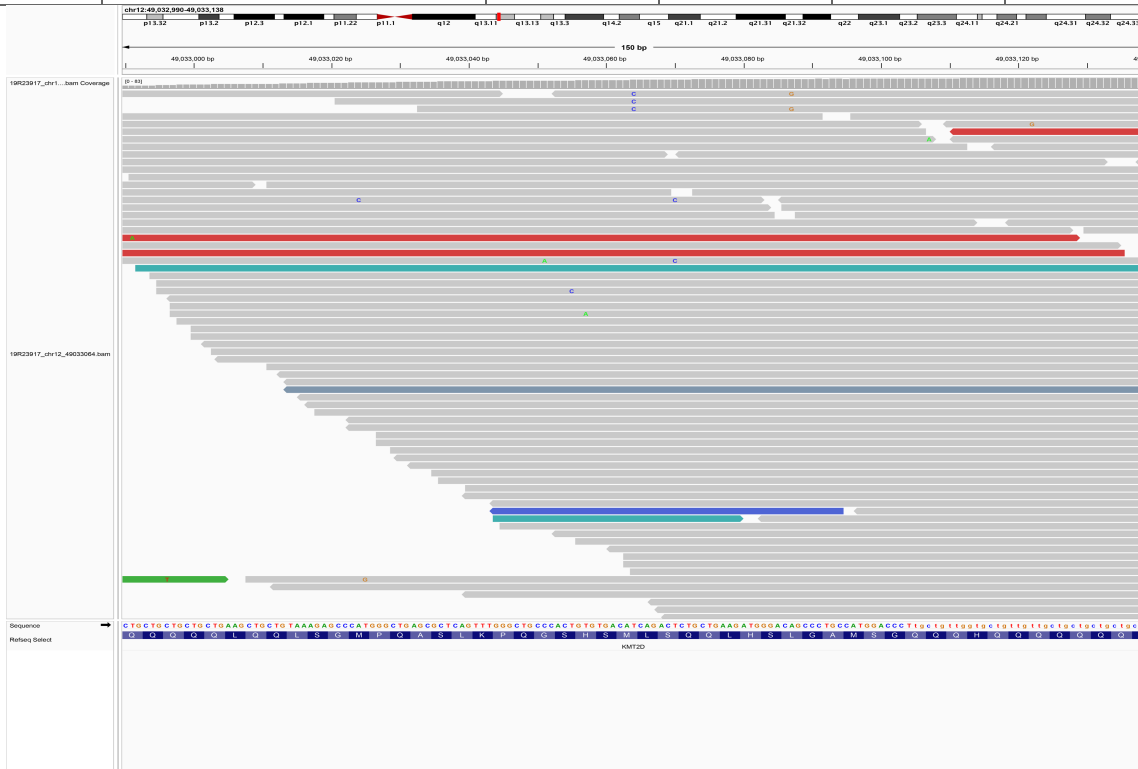



1.41. chr12\_49033262\_G/A

| SampleID | Variants (GRCh38)  | Ref_depth | Alt_depth | Gene  | Consequence      |
|----------|--------------------|-----------|-----------|-------|------------------|
| 18R08997 | chr12_49033262_G/A | 55        | 4         | KMT2D | missense_variant |

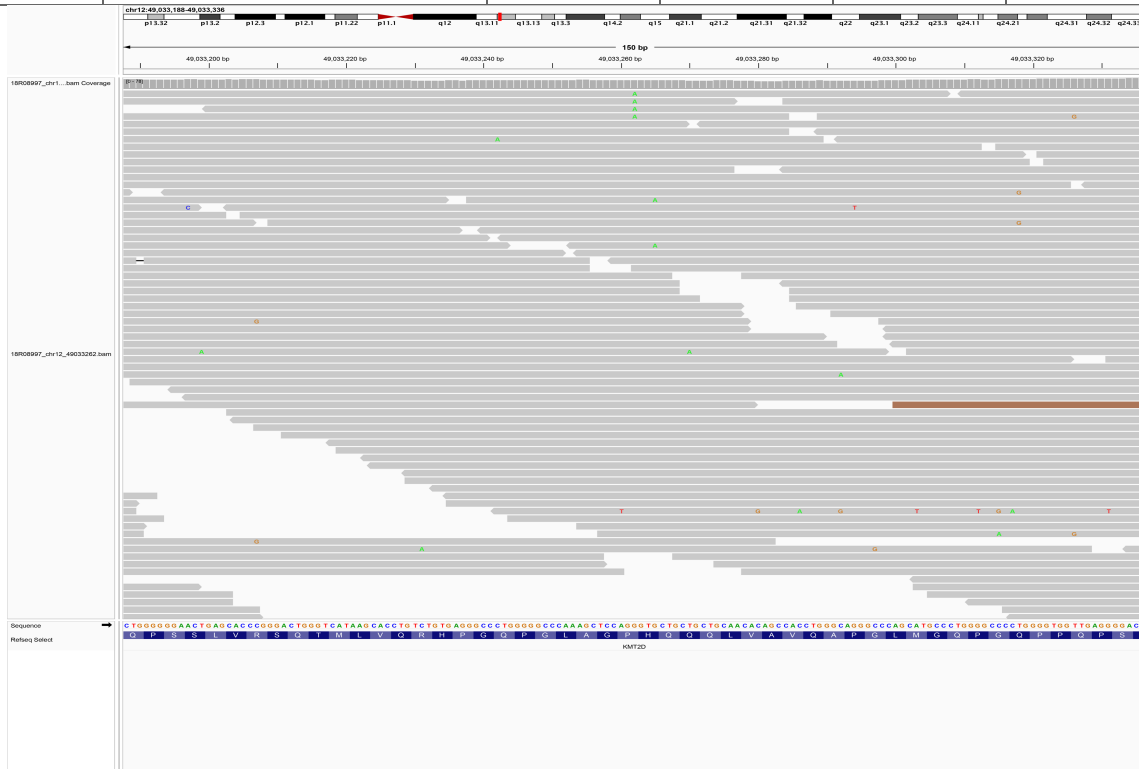

1.42. chr12\_49033363\_C/T

| SampleID | Variants (GRCh38)  | Ref_depth | Alt_depth | Gene  | Consequence      |
|----------|--------------------|-----------|-----------|-------|------------------|
| BGPL032  | chr12_49033363_C/T | 18        | 3         | KMT2D | missense_variant |
| BGPL502  | chr12_49033363_C/T | 32        | 13        | KMT2D | missense_variant |

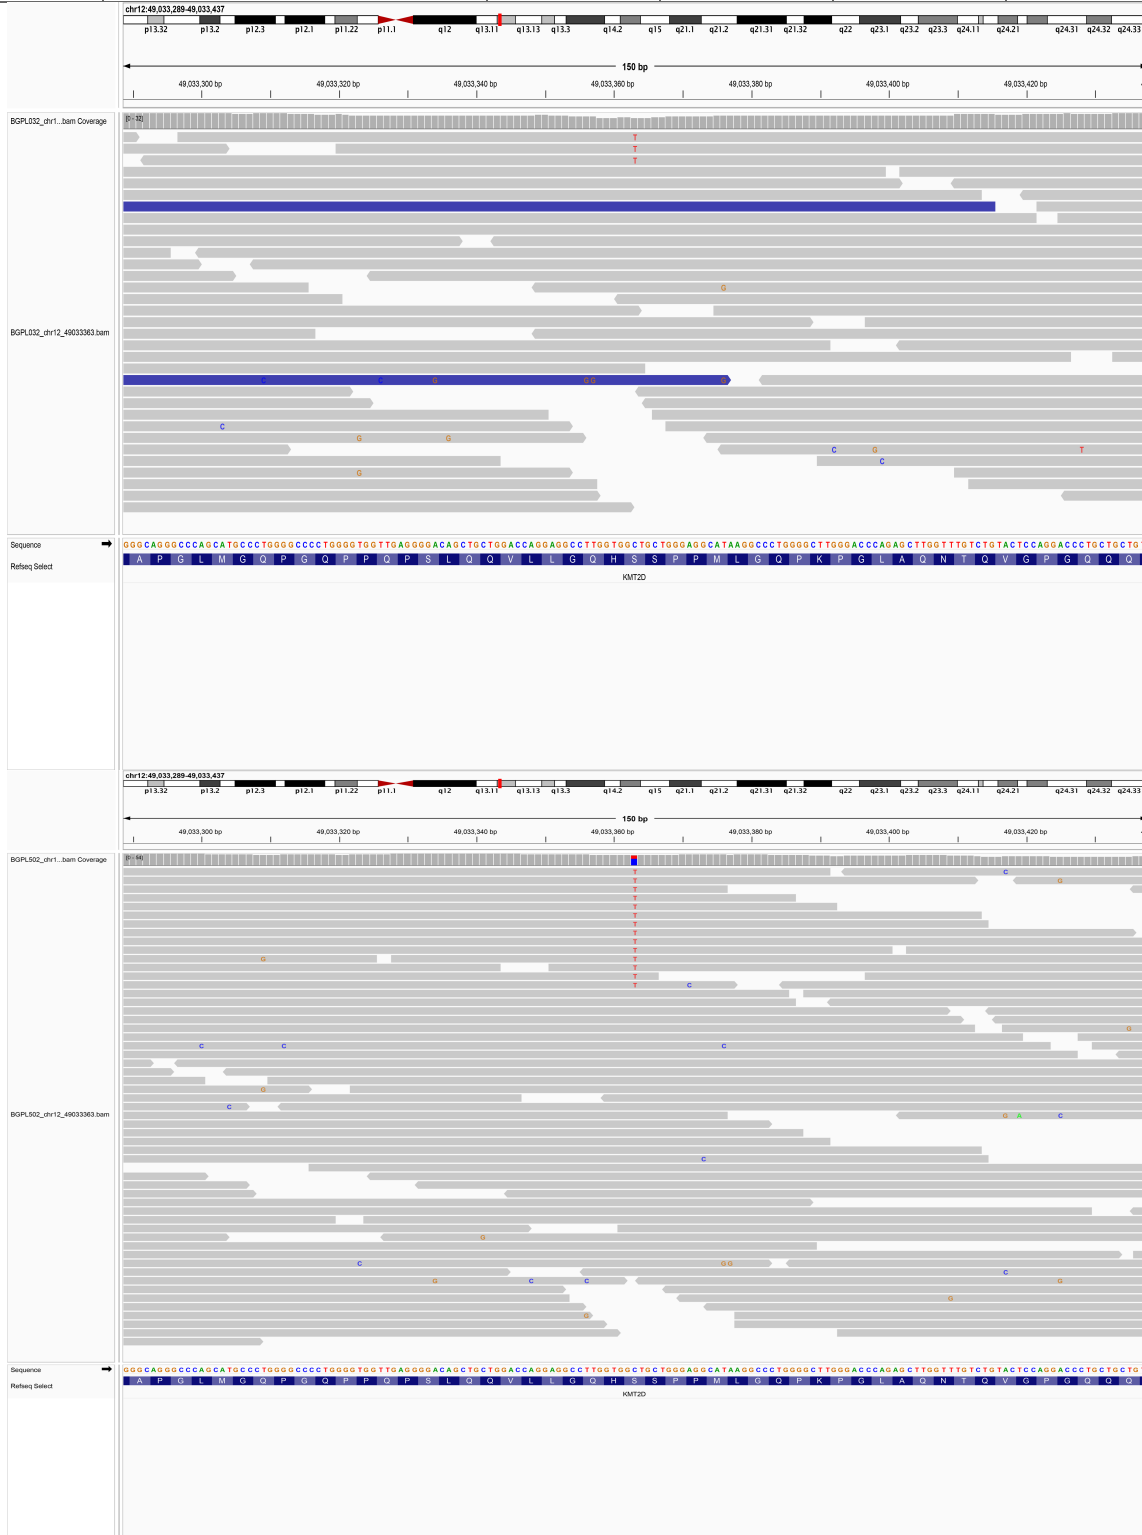

1.43. chr12\_49033420\_C/T

| SampleID | Variants (GRCh38)  | Ref_depth | Alt_depth | Gene         | Consequence      |
|----------|--------------------|-----------|-----------|--------------|------------------|
| 11250390 | chr12_49033420_C/T | 33        | 4         | <i>KMT2D</i> | missense_variant |

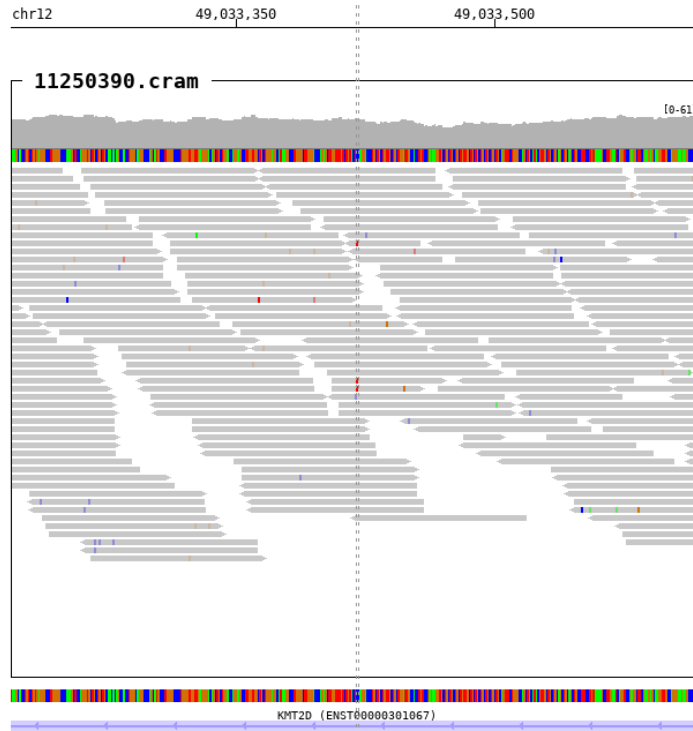





1.46. chr12\_49033581\_G/T

| SampleID | Variants (GRCh38)  | Ref_depth | Alt_depth | Gene  | Consequence      |
|----------|--------------------|-----------|-----------|-------|------------------|
| 18R19172 | chr12_49033581_G/T | 27        | 4         | KMT2D | missense_variant |

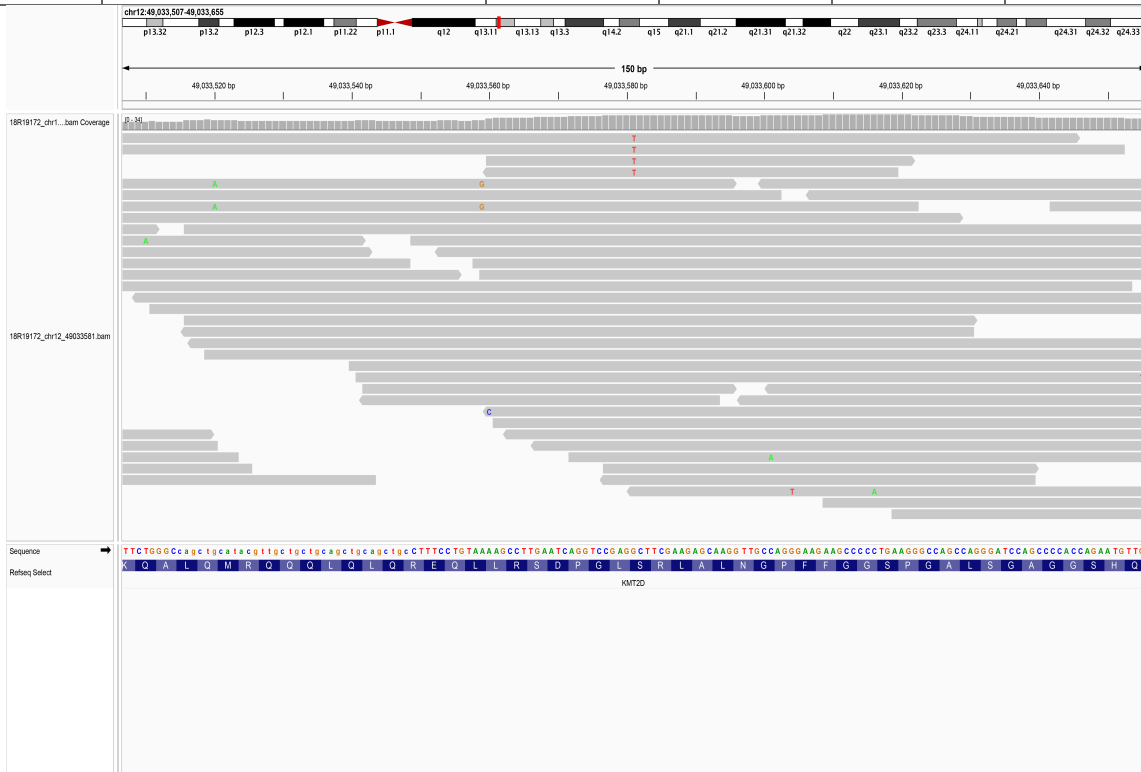

1.47. chr12\_49033612\_C/A

| SampleID | Variants (GRCh38)  | Ref_depth | Alt_depth | Gene         | Consequence      |
|----------|--------------------|-----------|-----------|--------------|------------------|
| 18R13010 | chr12_49033612_C/A | 49        | 4         | <i>KMT2D</i> | missense_variant |

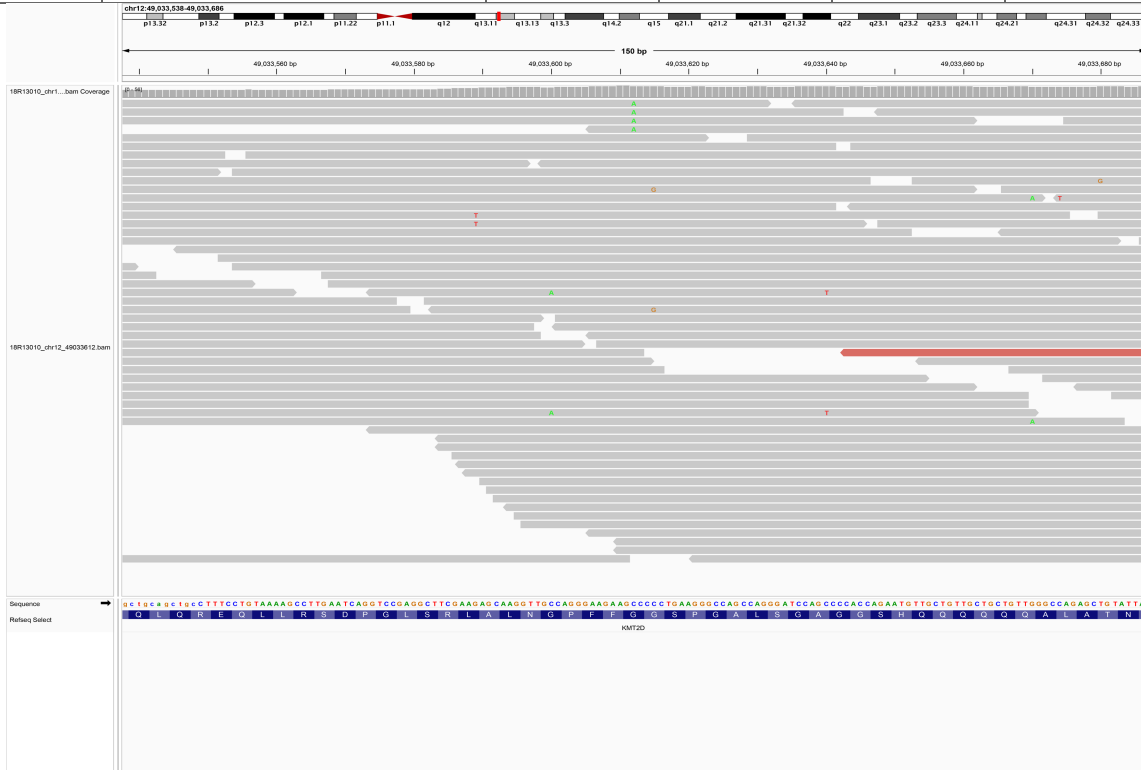

1.48. chr12\_49033645\_C/A

| SampleID | Variants (GRCh38)  | Ref_depth | Alt_depth | Gene  | Consequence      |
|----------|--------------------|-----------|-----------|-------|------------------|
| 18R15076 | chr12_49033645_C/A | 27        | 3         | KMT2D | missense_variant |

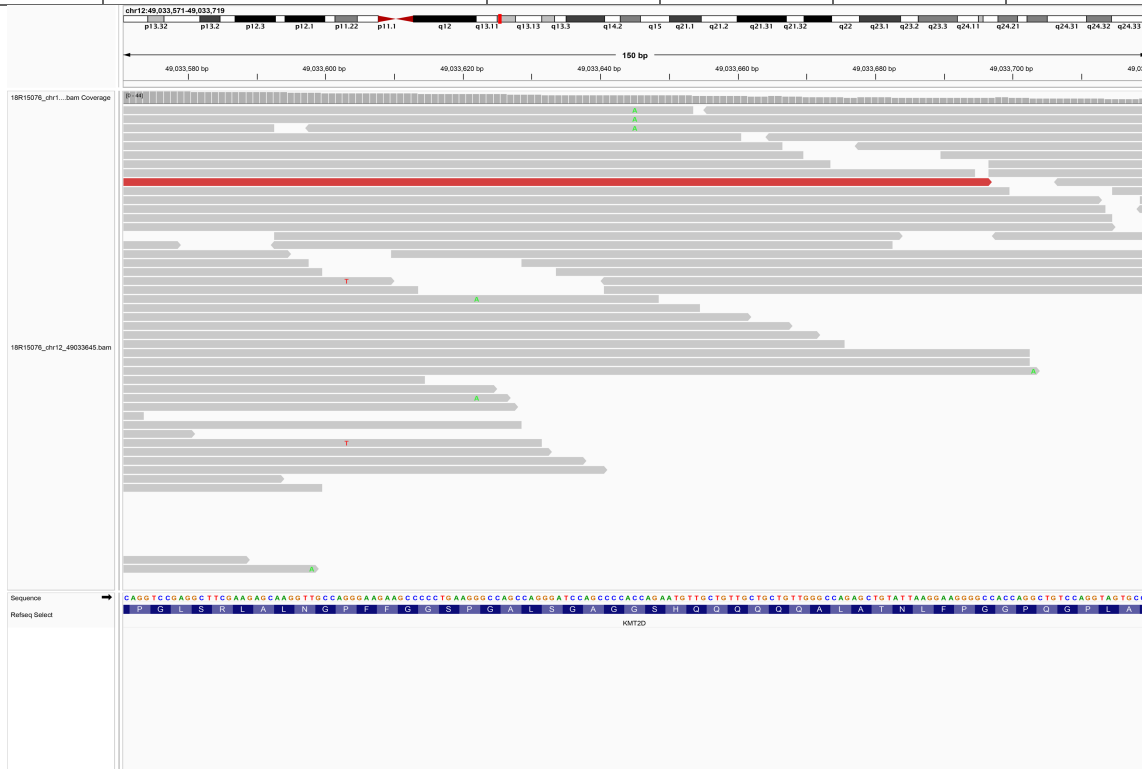



1.50. chr12\_49034068\_T/A

| SampleID | Variants (GRCh38)  | Ref_depth | Alt_depth | Gene  | Consequence      |
|----------|--------------------|-----------|-----------|-------|------------------|
| 19R23753 | chr12_49034068_T/A | 39        | 2         | KMT2D | missense_variant |

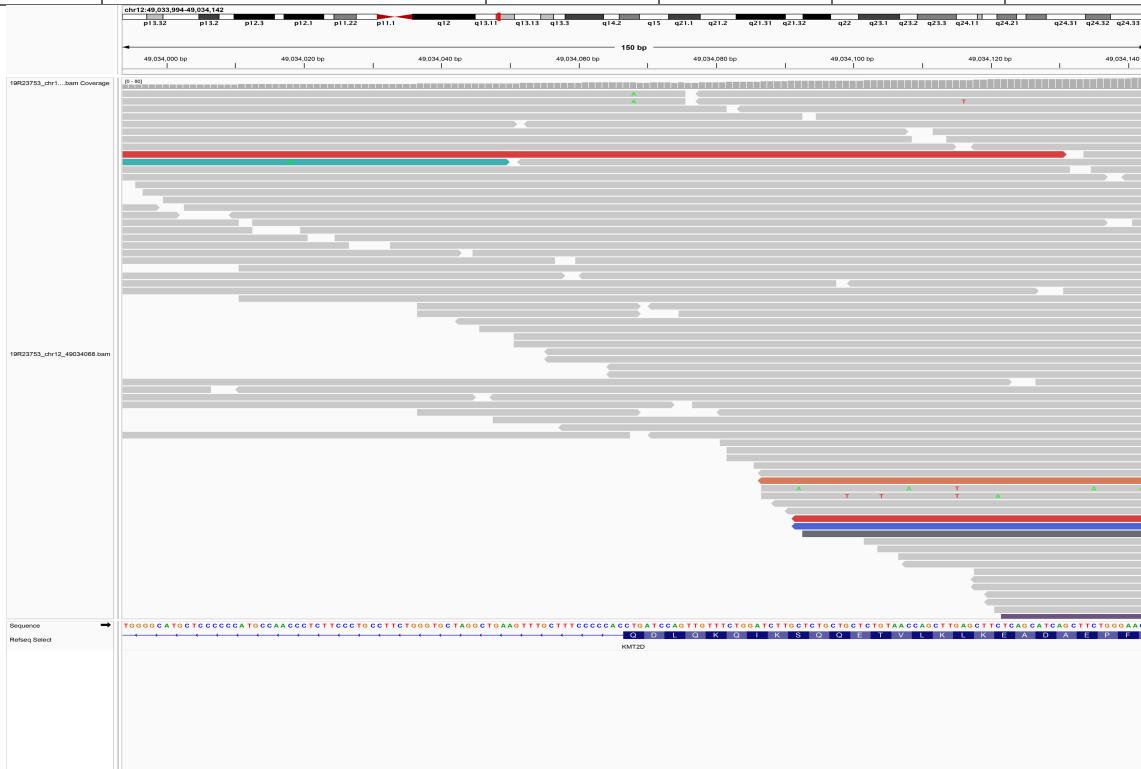



1.52. chr12\_49034149\_C/A

| SampleID | Variants (GRCh38)  | Ref_depth | Alt_depth | Gene  | Consequence      |
|----------|--------------------|-----------|-----------|-------|------------------|
| 18R12726 | chr12_49034149_C/A | 61        | 4         | KMT2D | missense_variant |

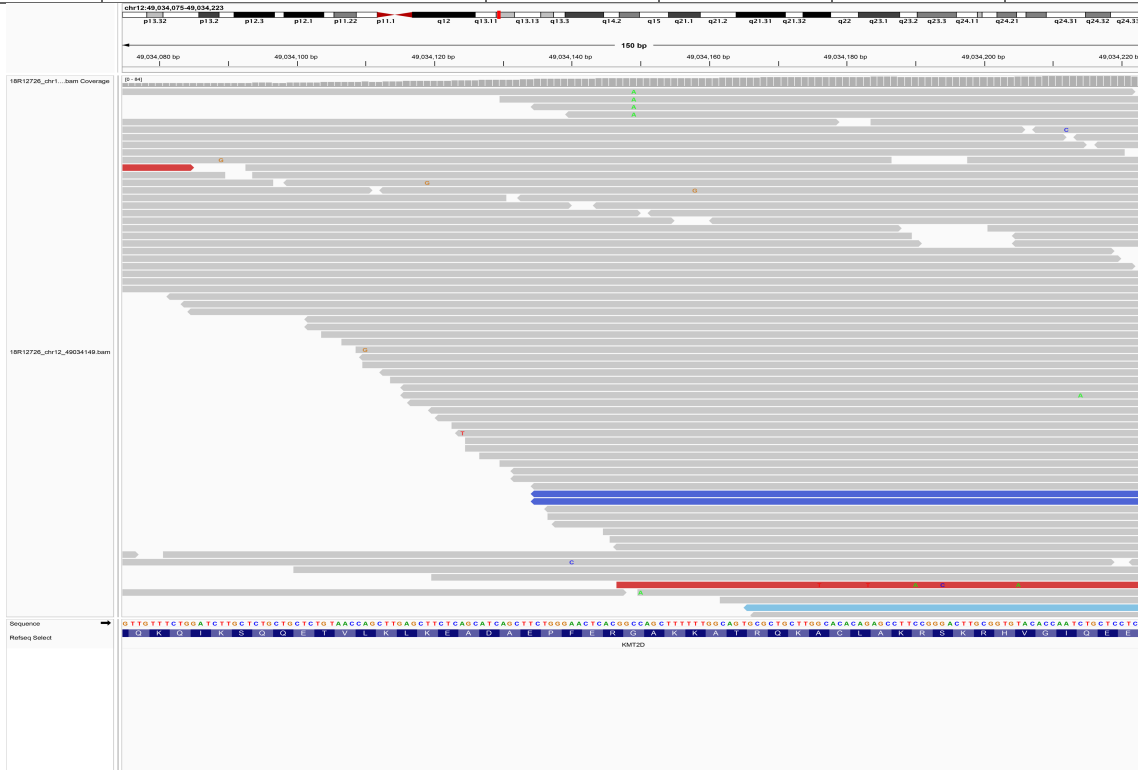

1.53. chr12\_49034150\_C/T

| SampleID | Variants (GRCh38)  | Ref_depth | Alt_depth | Gene  | Consequence      |
|----------|--------------------|-----------|-----------|-------|------------------|
| 19R23979 | chr12_49034150_C/T | 50        | 3         | KMT2D | missense_variant |

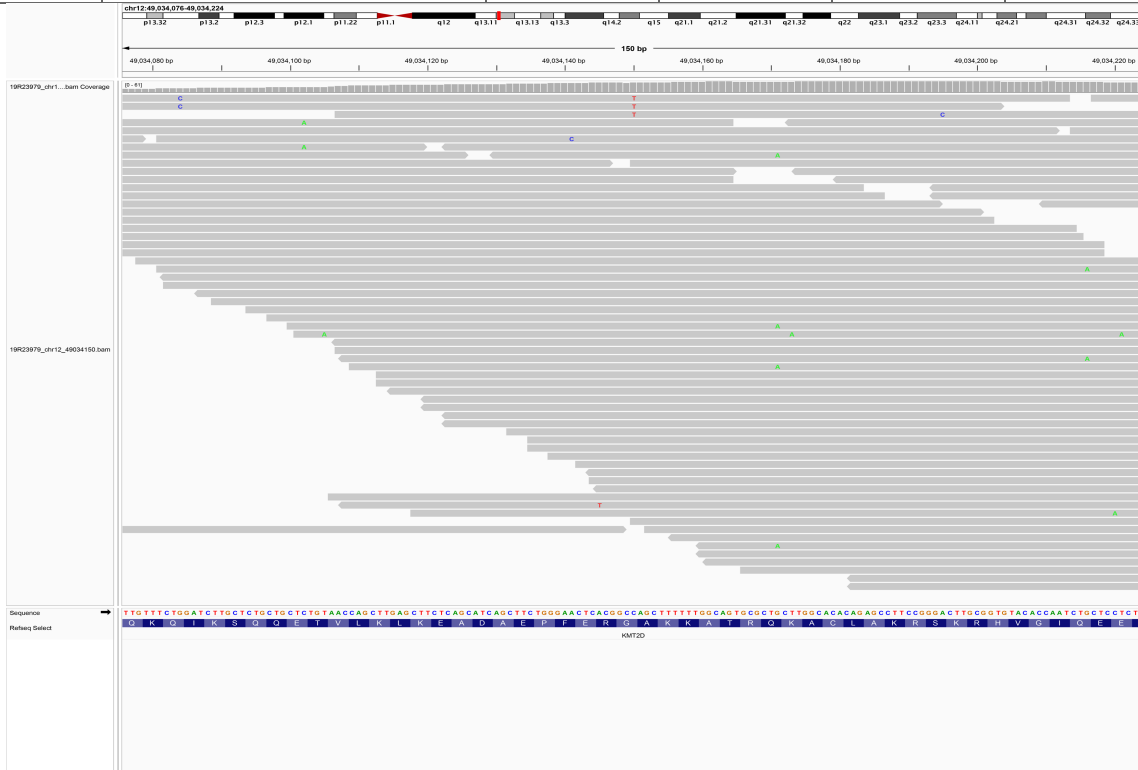



1.54. chr12\_49034436\_G/T

| SampleID | Variants (GRCh38)  | Ref_depth | Alt_depth | Gene  | Consequence      |
|----------|--------------------|-----------|-----------|-------|------------------|
| 18R15004 | chr12_49034436_G/T | 42        | 4         | KMT2D | missense_variant |

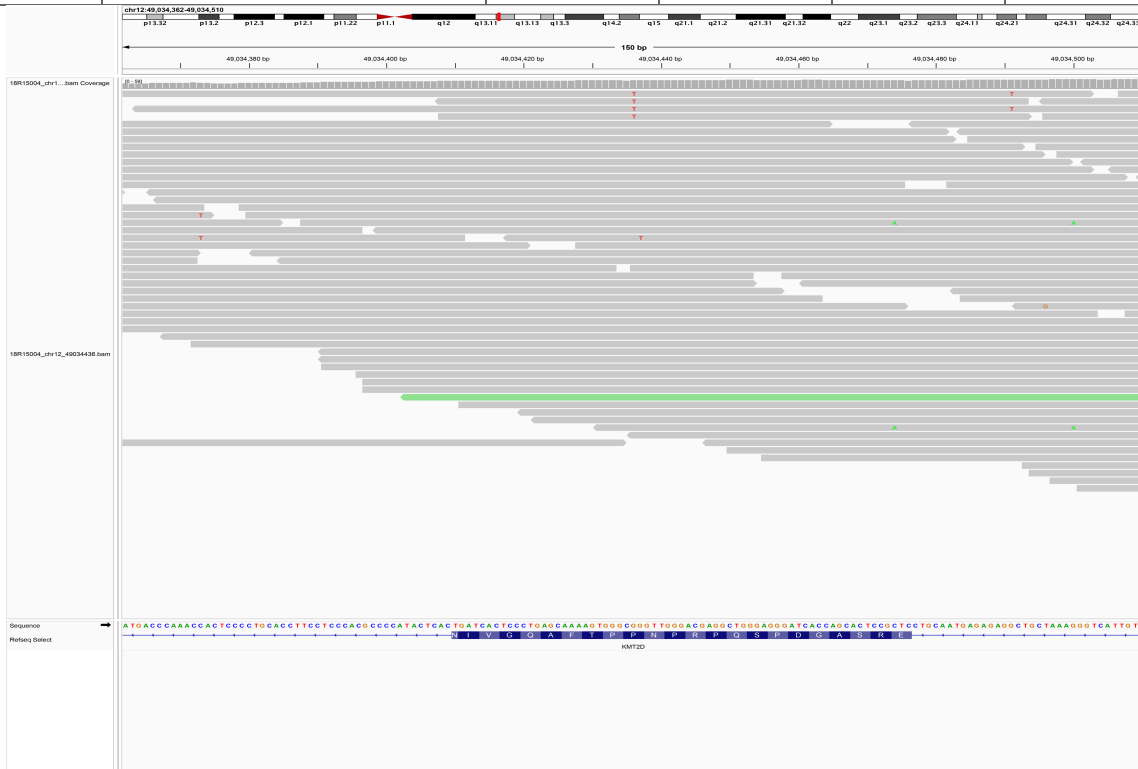

1.55. chr12\_49034446\_G/A

| SampleID    | Variants (GRCh38)  | Ref_depth | Alt_depth | Gene  | Consequence      |
|-------------|--------------------|-----------|-----------|-------|------------------|
| AAGC031591D | chr12_49034446_G/A | 33        | 14        | KMT2D | missense_variant |

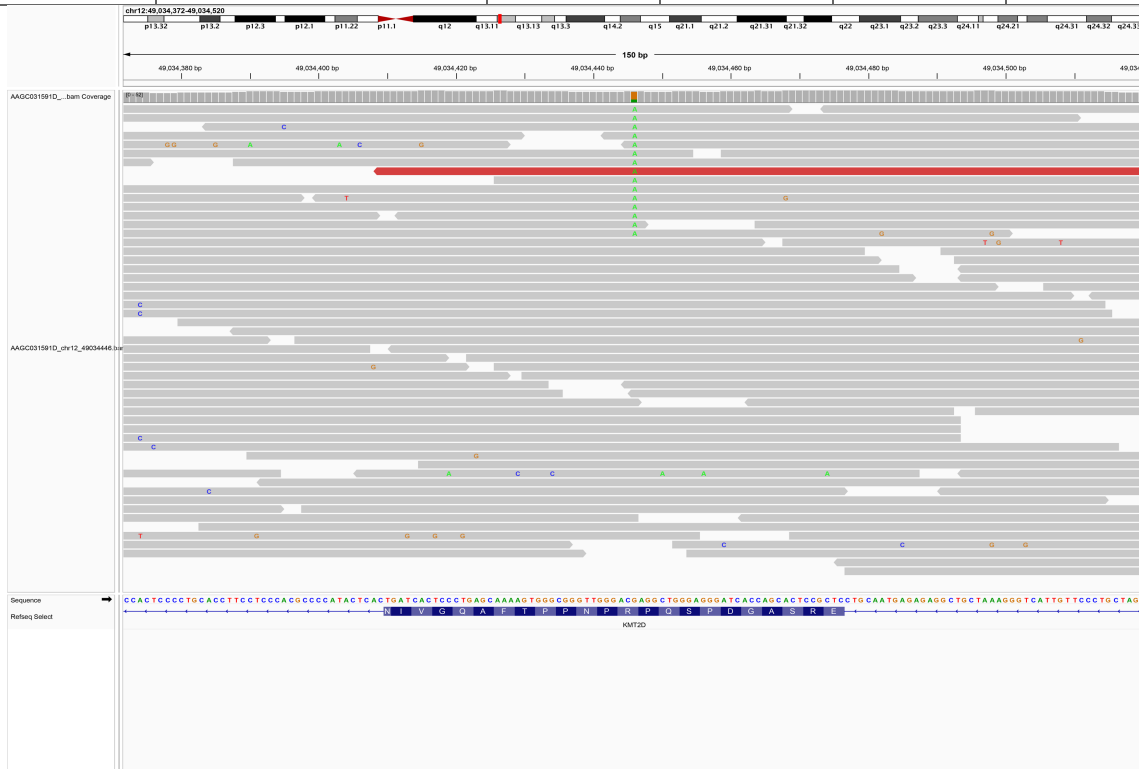

1.56. chr12\_49034449\_G/C

| SampleID | Variants (GRCh38)  | Ref_depth | Alt_depth | Gene  | Consequence      |
|----------|--------------------|-----------|-----------|-------|------------------|
| 18R12863 | chr12_49034449_G/C | 42        | 3         | KMT2D | missense_variant |

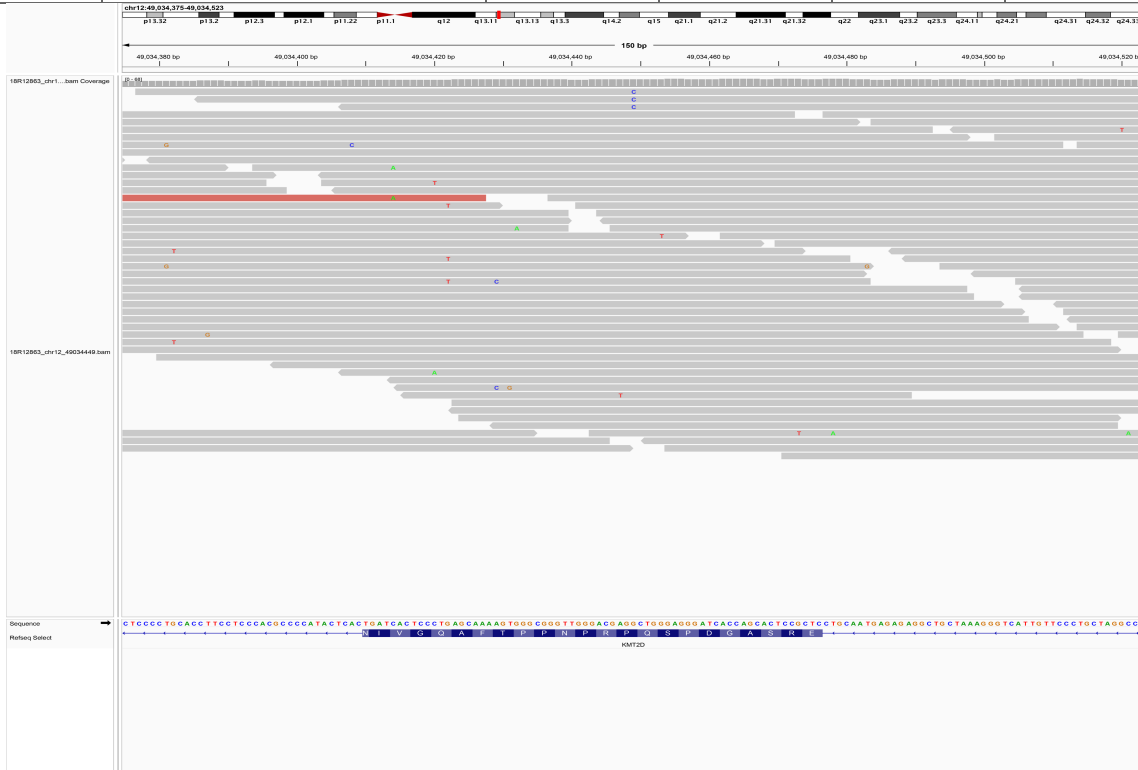

1.57. chr12\_49034621\_G/T

| SampleID | Variants (GRCh38)  | Ref_depth | Alt_depth | Gene         | Consequence      |
|----------|--------------------|-----------|-----------|--------------|------------------|
| 18R09135 | chr12_49034621_G/T | 61        | 4         | <i>KMT2D</i> | missense_variant |

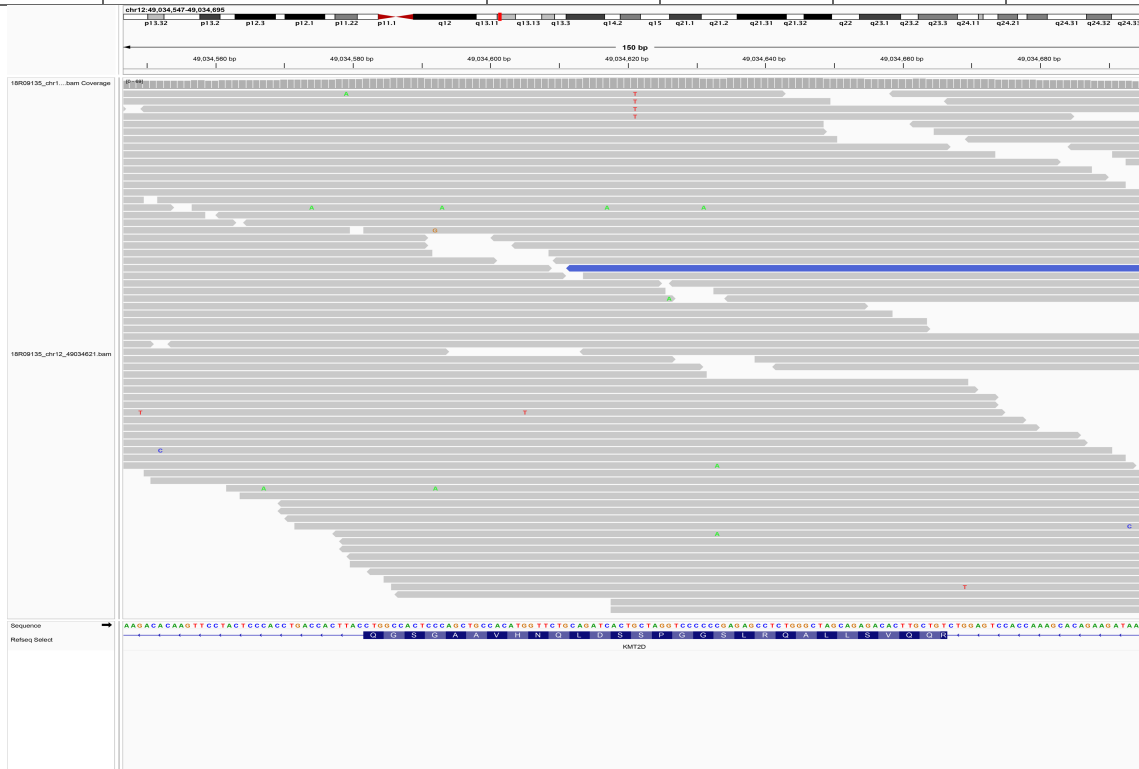





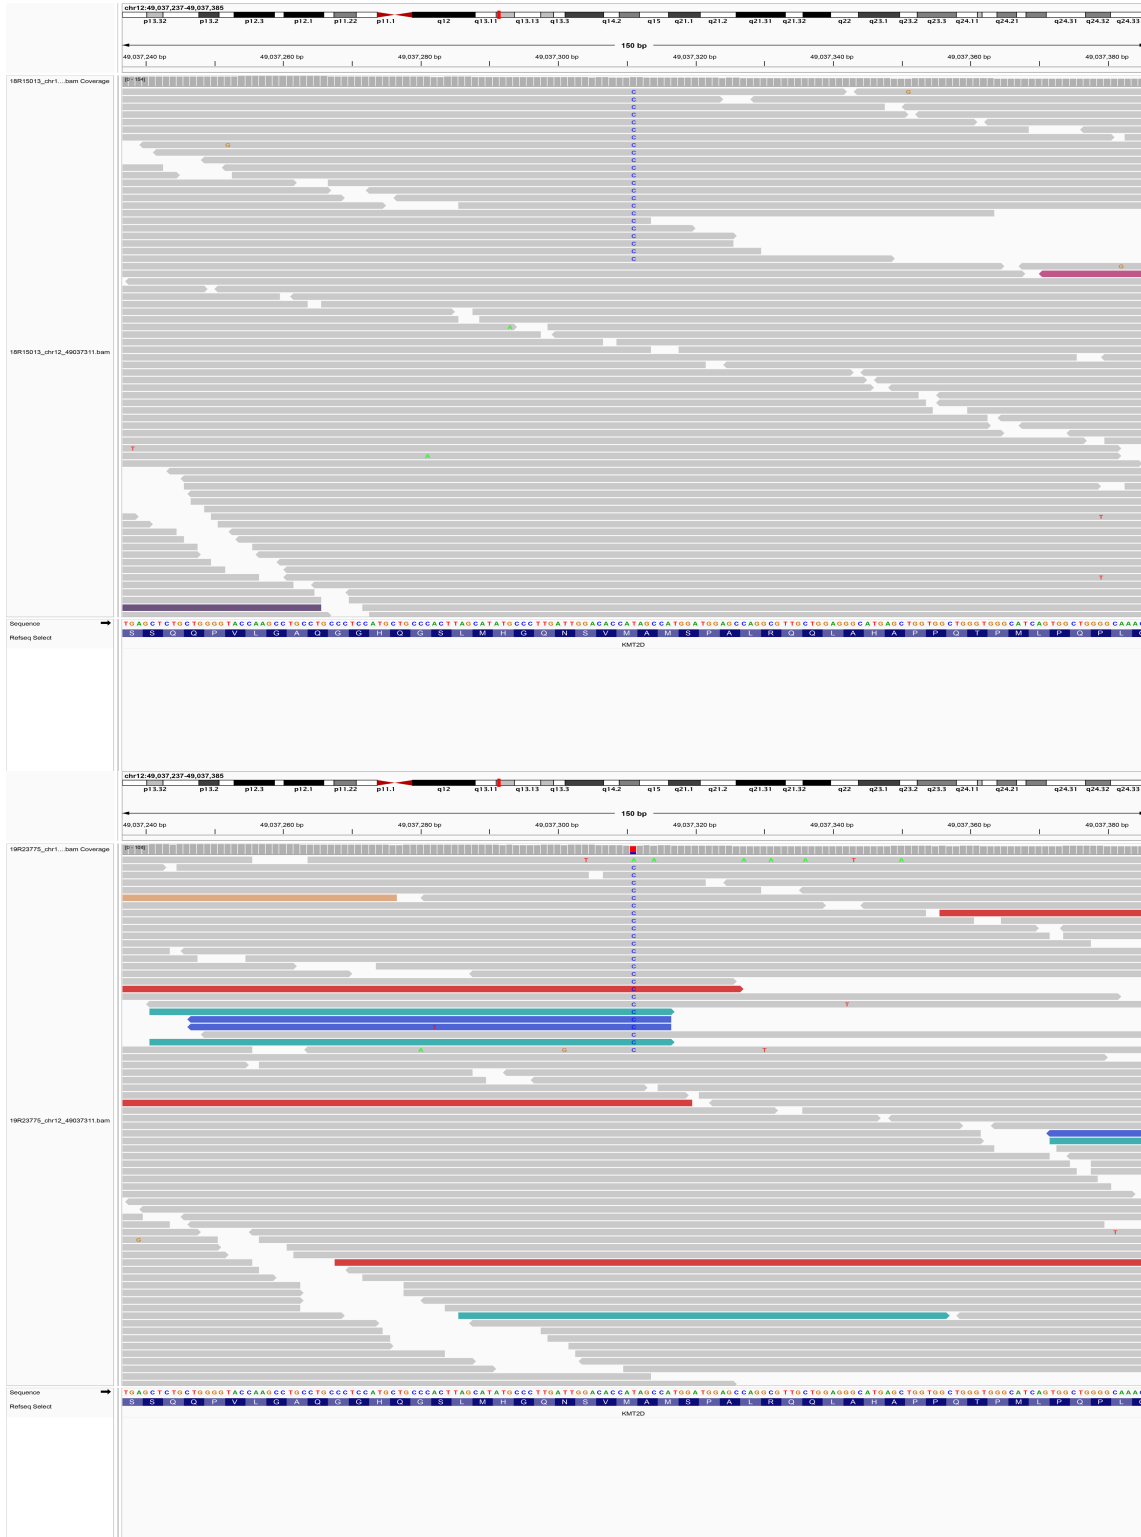

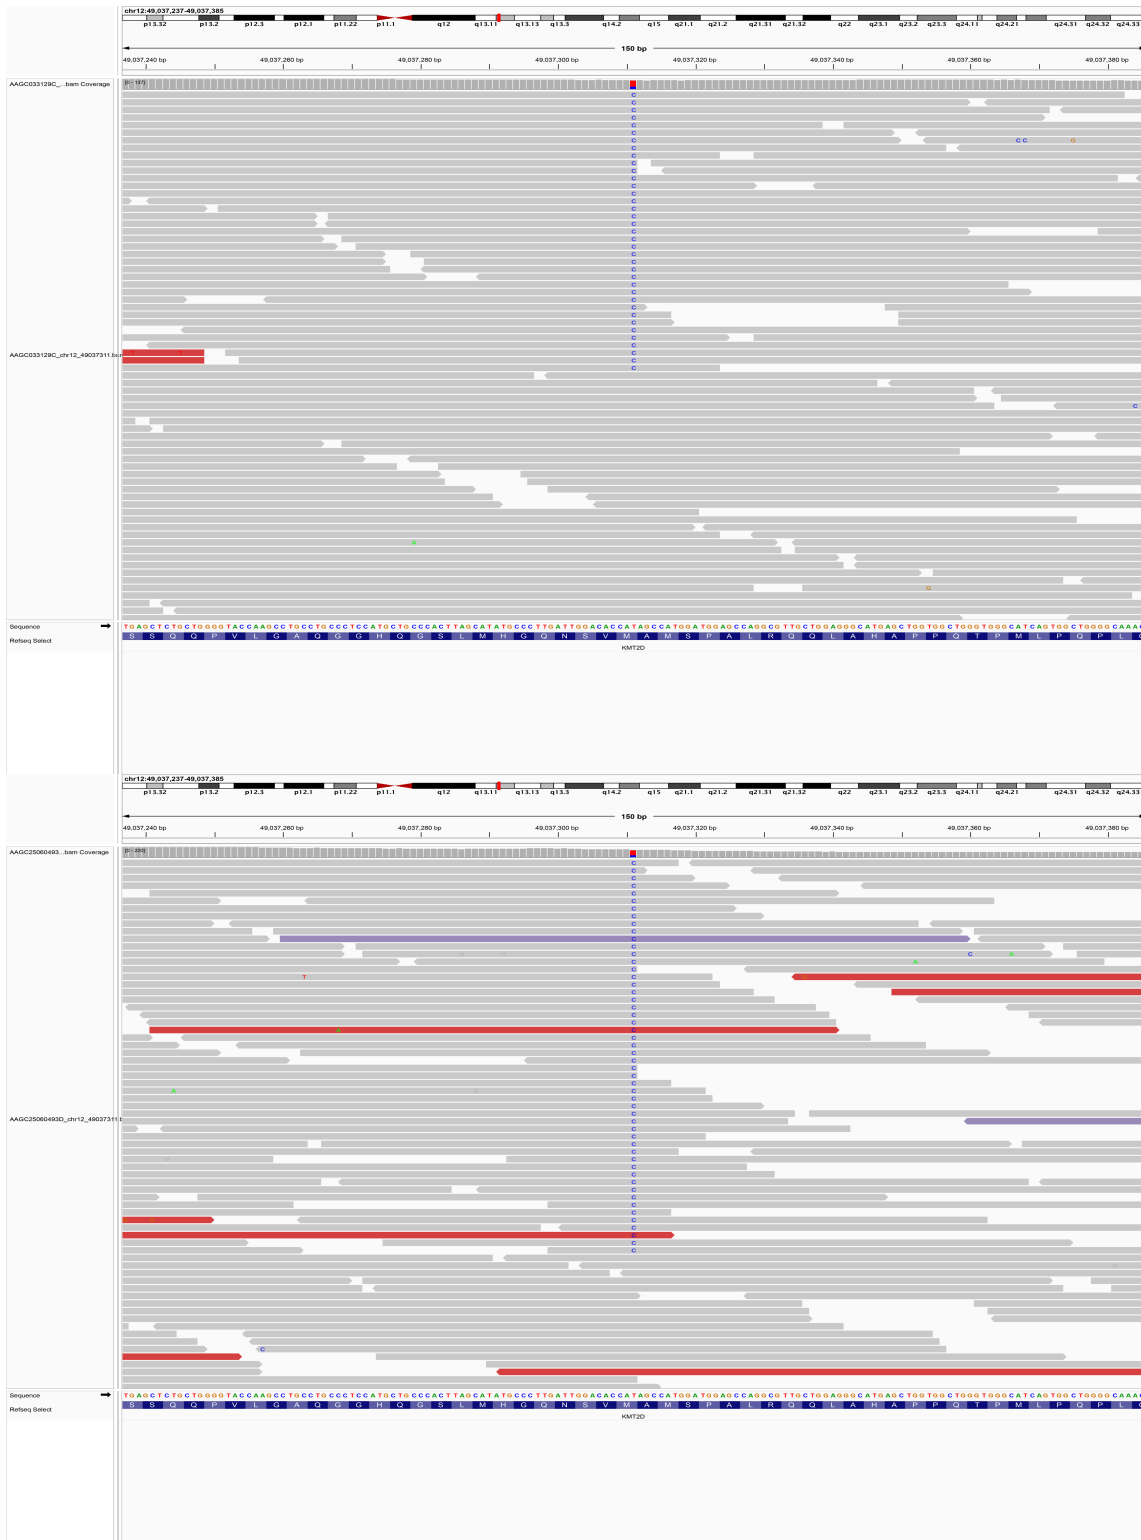

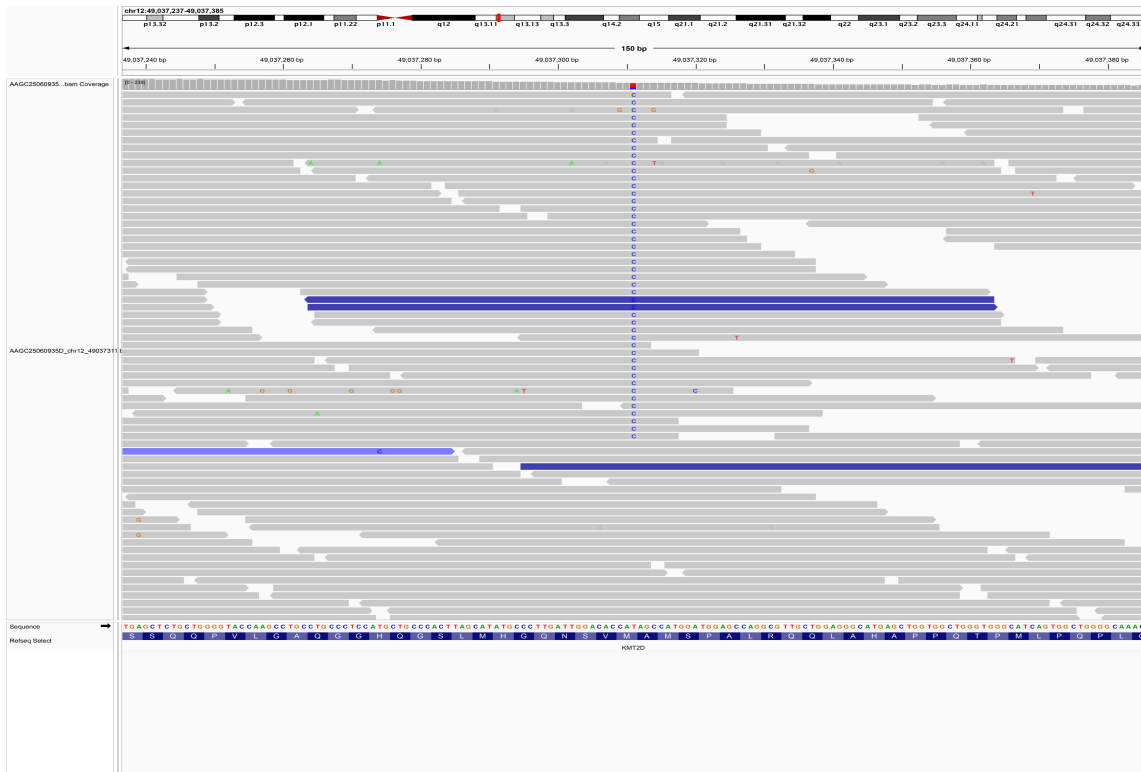

1.60. chr12\_49037664\_T/C

| SampleID | Variants (GRCh38)  | Ref_depth | Alt_depth | Gene         | Consequence      |
|----------|--------------------|-----------|-----------|--------------|------------------|
| 18R08820 | chr12_49037664_T/C | 36        | 3         | <i>KMT2D</i> | missense_variant |

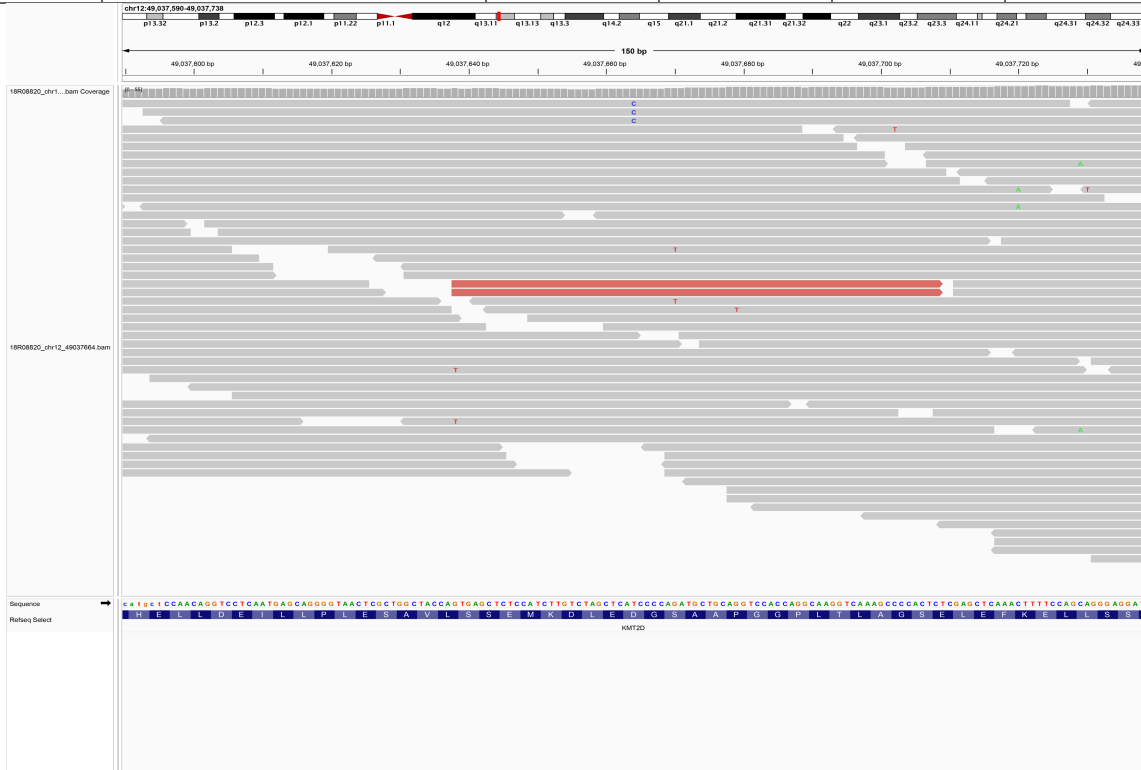

1.61. chr12\_49037668\_C/A

| SampleID | Variants (GRCh38)  | Ref_depth | Alt_depth | Gene  | Consequence      |
|----------|--------------------|-----------|-----------|-------|------------------|
| 18R19192 | chr12_49037668_C/A | 60        | 4         | KMT2D | missense_variant |

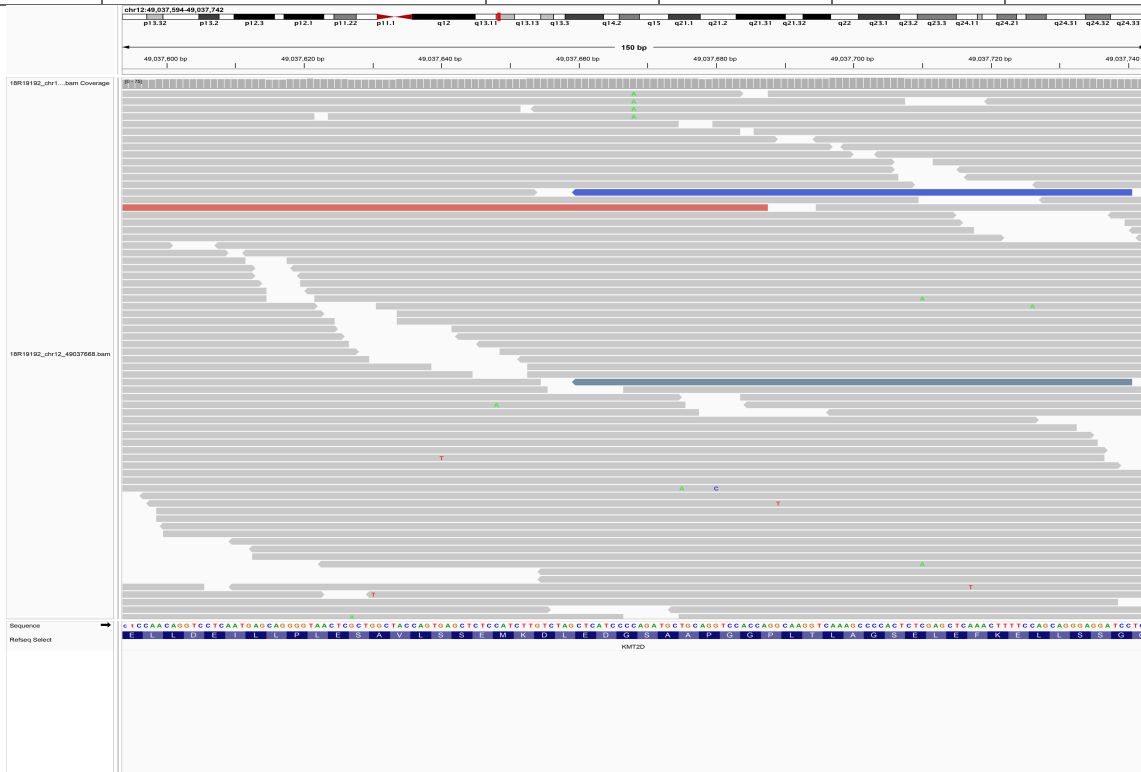

1.62. chr12\_49038060\_C/A

| SampleID | Variants (GRCh38)  | Ref_depth | Alt_depth | Gene  | Consequence      |
|----------|--------------------|-----------|-----------|-------|------------------|
| 18R09249 | chr12_49038060_C/A | 47        | 2         | KMT2D | missense_variant |

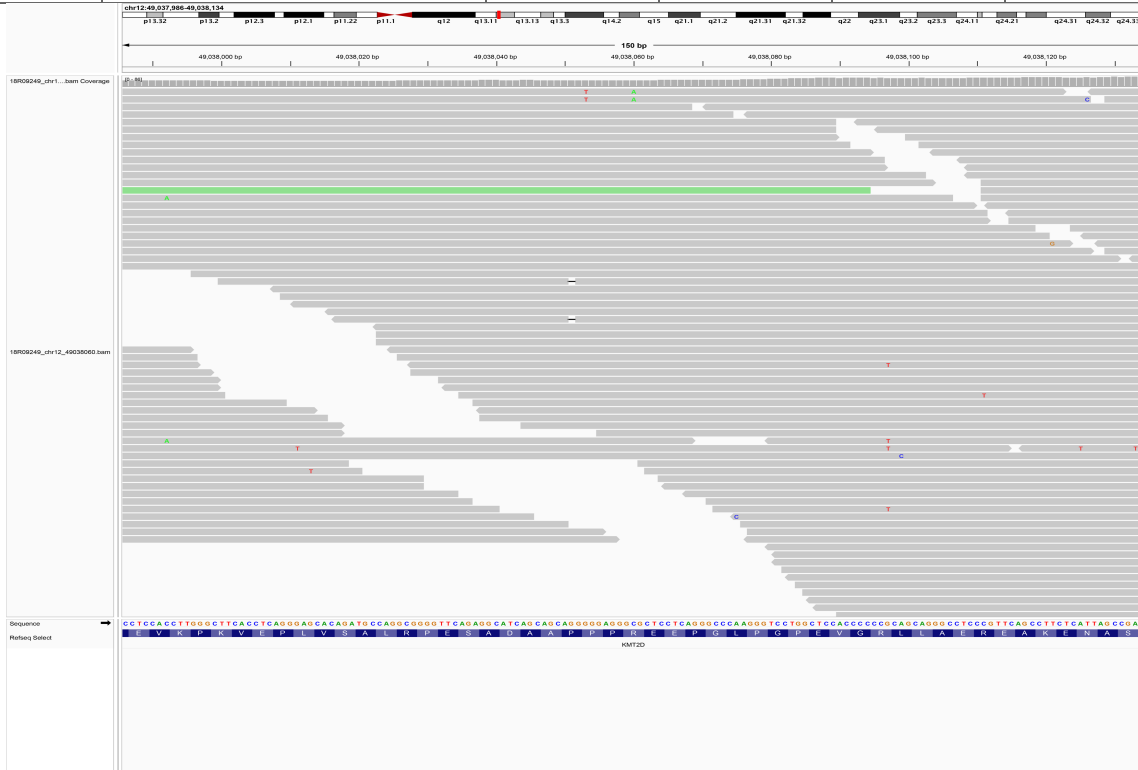

1.63. chr12\_49038292\_C/A

| SampleID | Variants (GRCh38)  | Ref_depth | Alt_depth | Gene  | Consequence      |
|----------|--------------------|-----------|-----------|-------|------------------|
| 18R09528 | chr12_49038292_C/A | 35        | 5         | KMT2D | missense_variant |

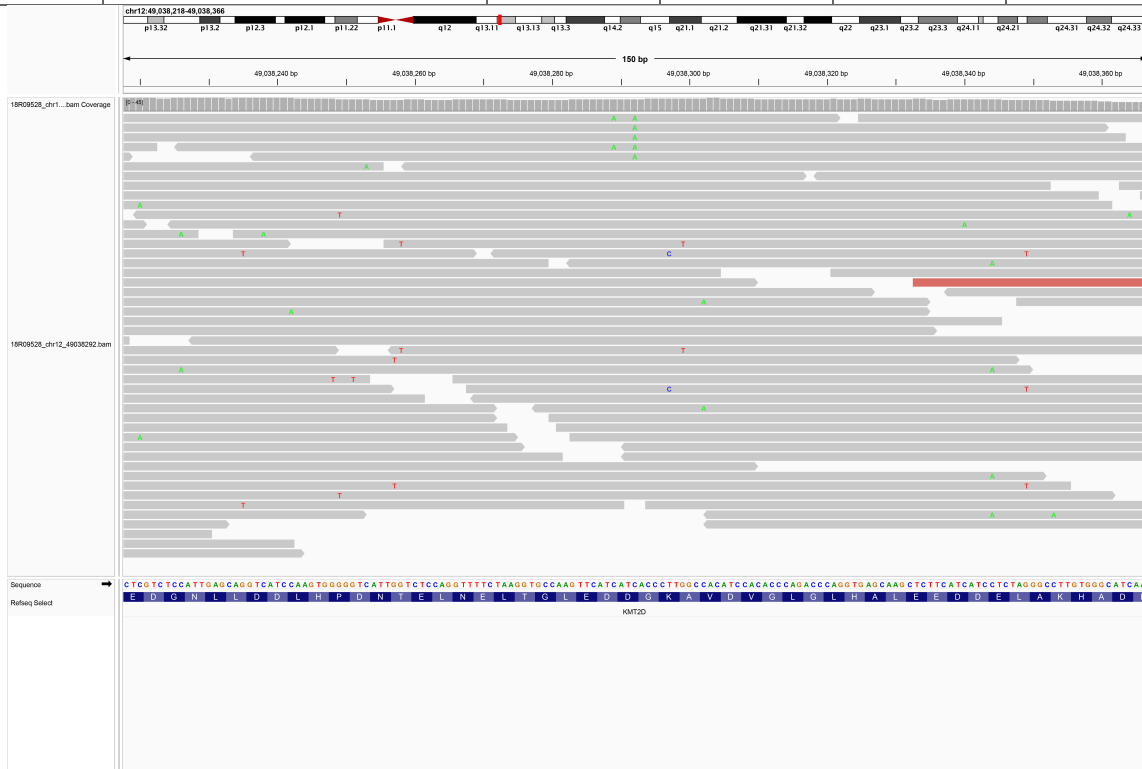

1.64. chr12\_49038543\_G/T

| SampleID | Variants (GRCh38)  | Ref_depth | Alt_depth | Gene  | Consequence      |
|----------|--------------------|-----------|-----------|-------|------------------|
| 18R08979 | chr12_49038543_G/T | 83        | 4         | KMT2D | missense_variant |

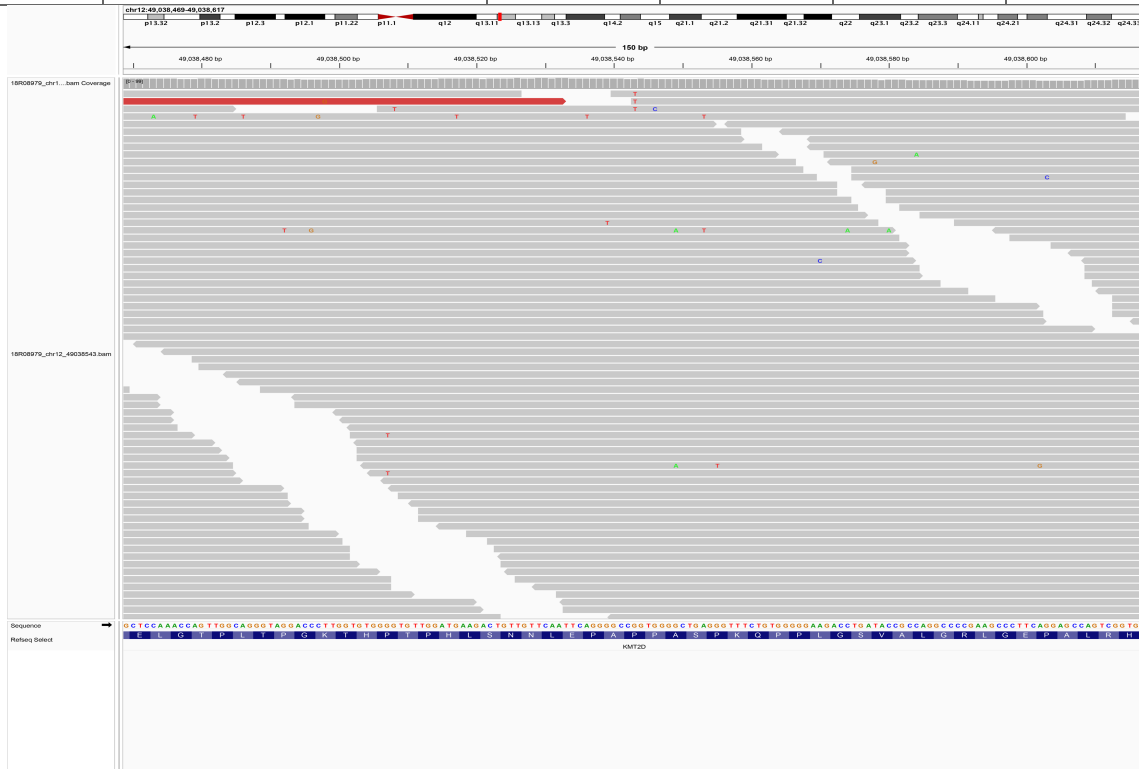

1.65. chr12\_49038579\_A/C

| SampleID | Variants (GRCh38)  | Ref_depth | Alt_depth | Gene         | Consequence      |
|----------|--------------------|-----------|-----------|--------------|------------------|
| 10281420 | chr12_49038579_A/C | 61        | 7         | <i>KMT2D</i> | missense_variant |

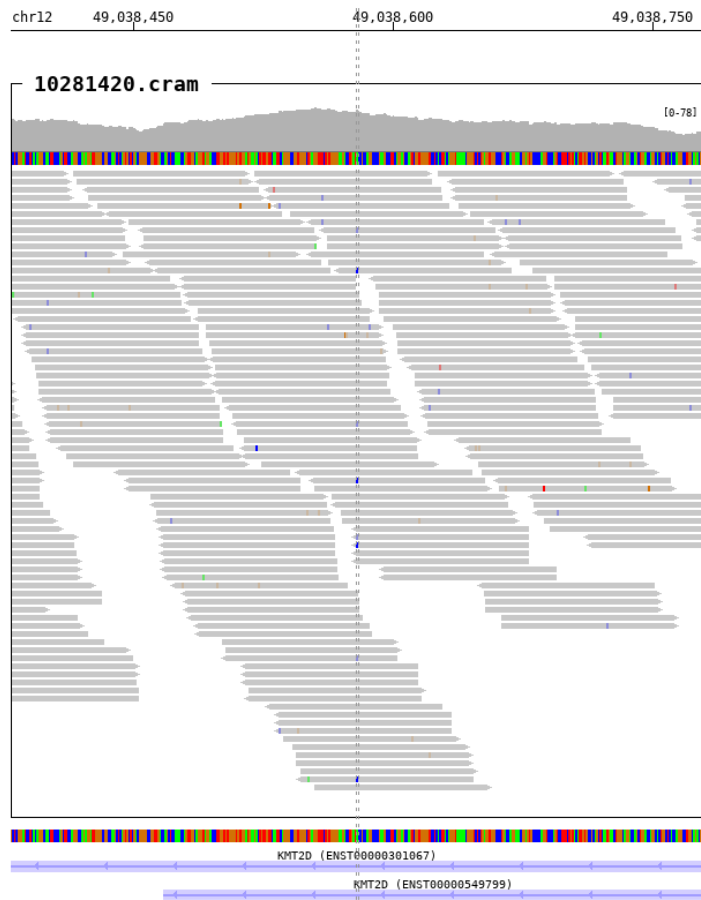

1.66. chr12\_49038582\_G/A

| SampleID | Variants (GRCh38)  | Ref_depth | Alt_depth | Gene  | Consequence      |
|----------|--------------------|-----------|-----------|-------|------------------|
| 18R08852 | chr12_49038582_G/A | 53        | 4         | KMT2D | missense_variant |

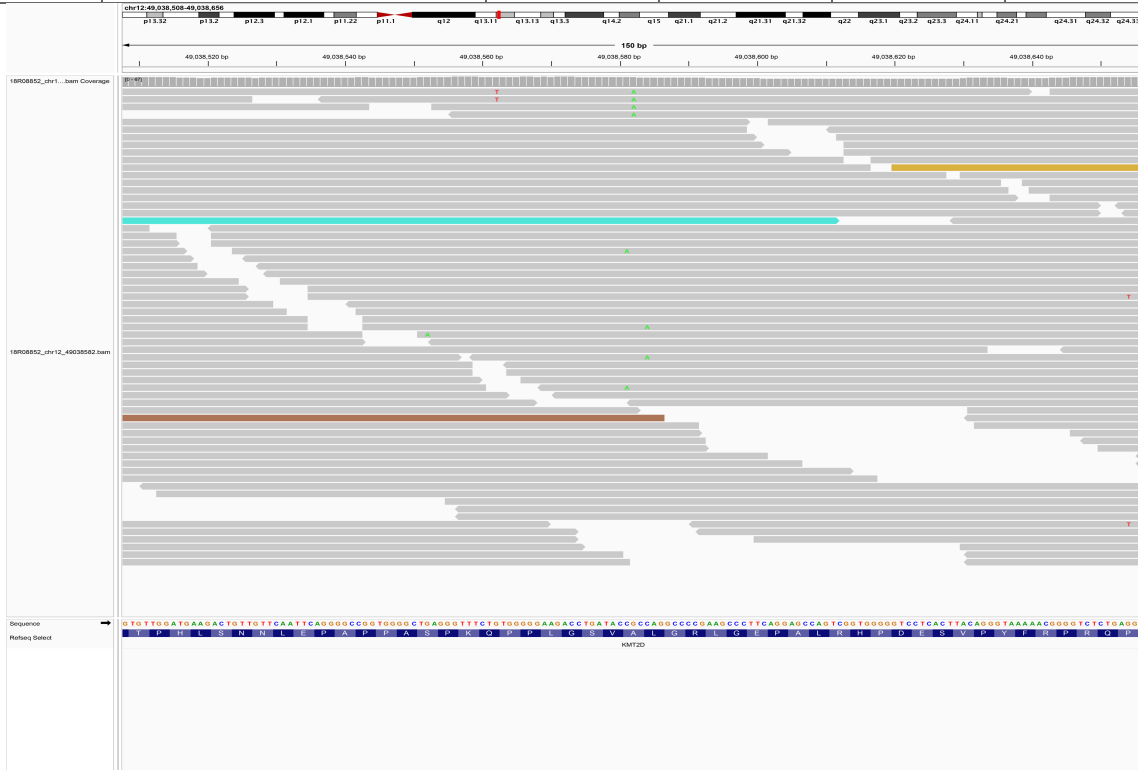

1.67. chr12\_49038706\_C/G

| SampleID | Variants (GRCh38)  | Ref_depth | Alt_depth | Gene  | Consequence      |
|----------|--------------------|-----------|-----------|-------|------------------|
| 17R10039 | chr12_49038706_C/G | 35        | 3         | KMT2D | missense_variant |

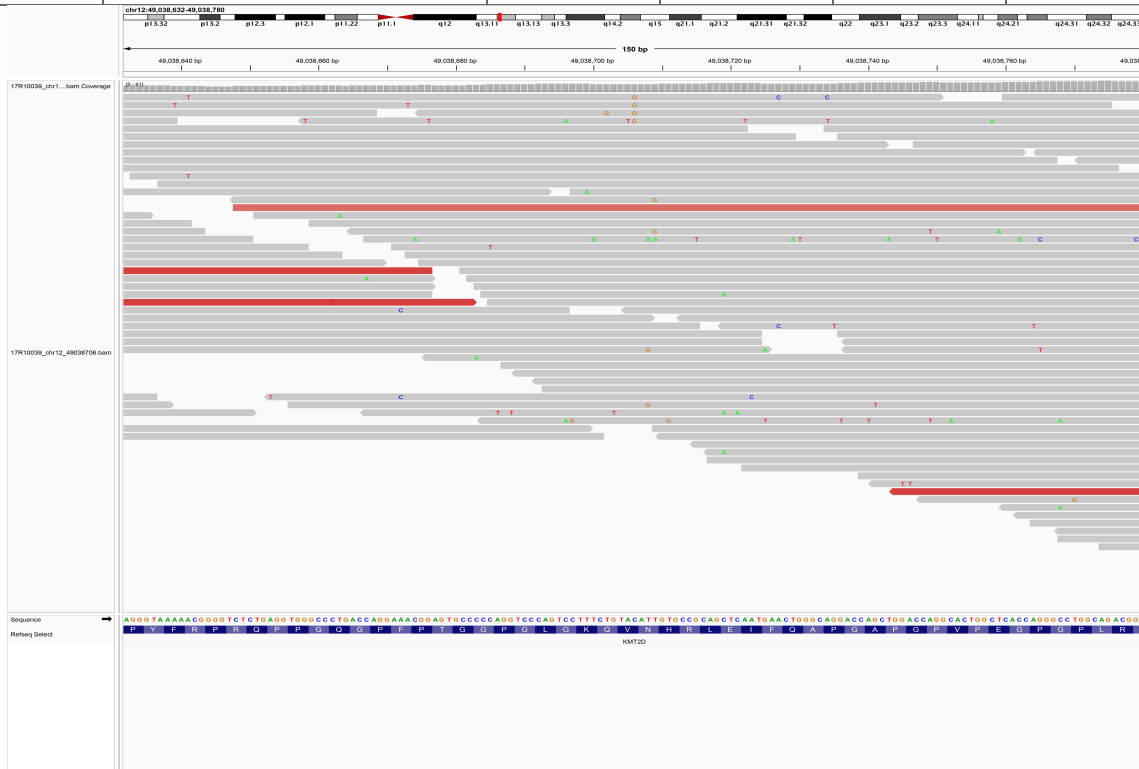

1.68. chr12\_49038772\_G/C

| SampleID | Variants (GRCh38)  | Ref_depth | Alt_depth | Gene         | Consequence      |
|----------|--------------------|-----------|-----------|--------------|------------------|
| 10511925 | chr12_49038772_G/C | 16        | 4         | <i>KMT2D</i> | missense_variant |

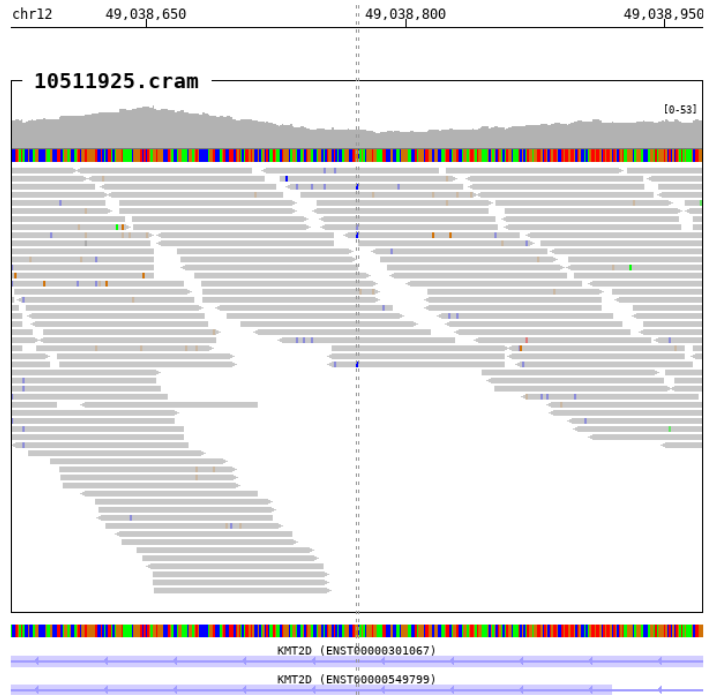



1.70. chr12\_49038952\_C/T

| SampleID    | Variants (GRCh38)  | Ref_depth | Alt_depth | Gene  | Consequence      |
|-------------|--------------------|-----------|-----------|-------|------------------|
| AAGC032810D | chr12_49038952_C/T | 30        | 6         | KMT2D | missense_variant |

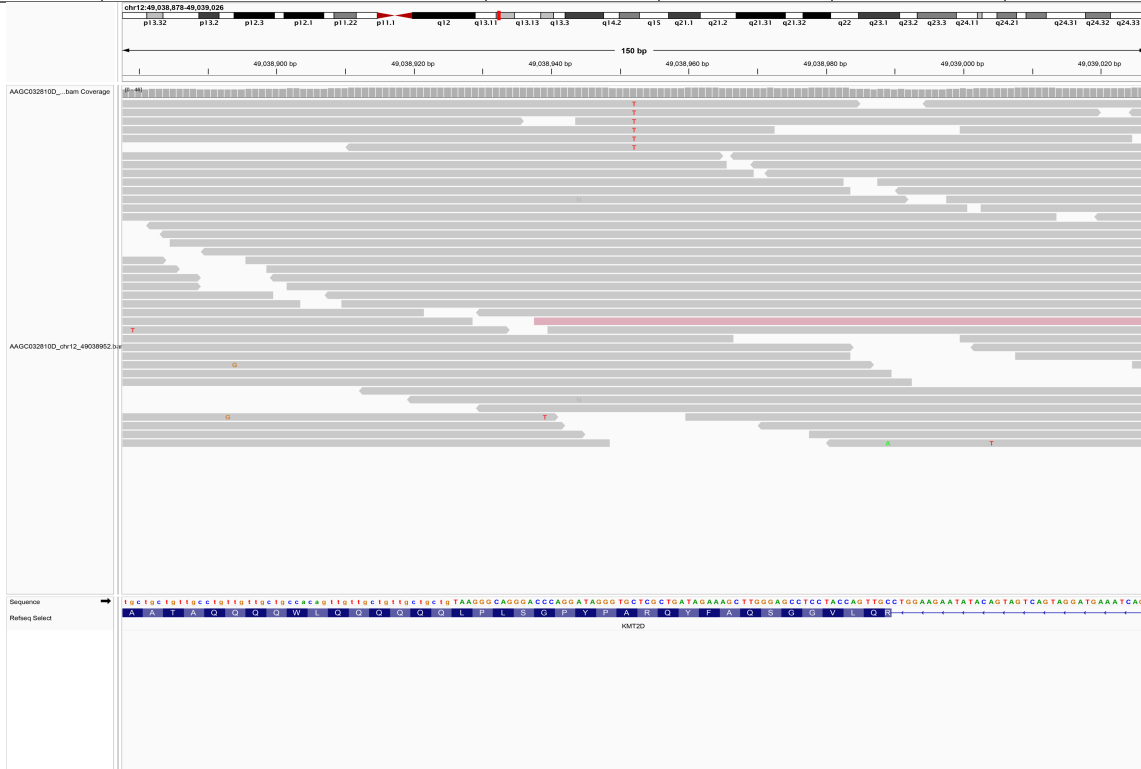

1.71. chr12\_49040068\_G/A

| SampleID | Variants (GRCh38)  | Ref_depth | Alt_depth | Gene  | Consequence      |
|----------|--------------------|-----------|-----------|-------|------------------|
| A0135    | chr12_49040068_G/A | 261       | 5         | KMT2D | missense_variant |

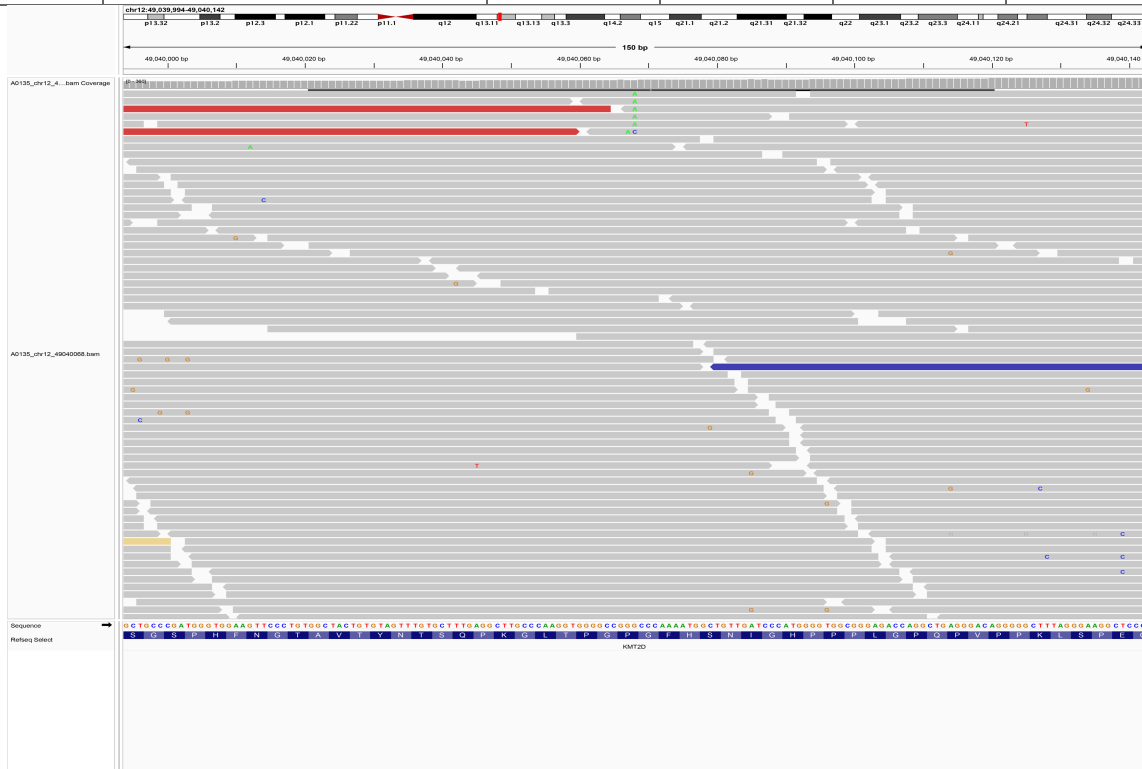

1.72. chr12\_49040263\_C/T

| SampleID | Variants (GRCh38)  | Ref_depth | Alt_depth | Gene  | Consequence      |
|----------|--------------------|-----------|-----------|-------|------------------|
| 19R23921 | chr12_49040263_C/T | 57        | 4         | KMT2D | missense_variant |

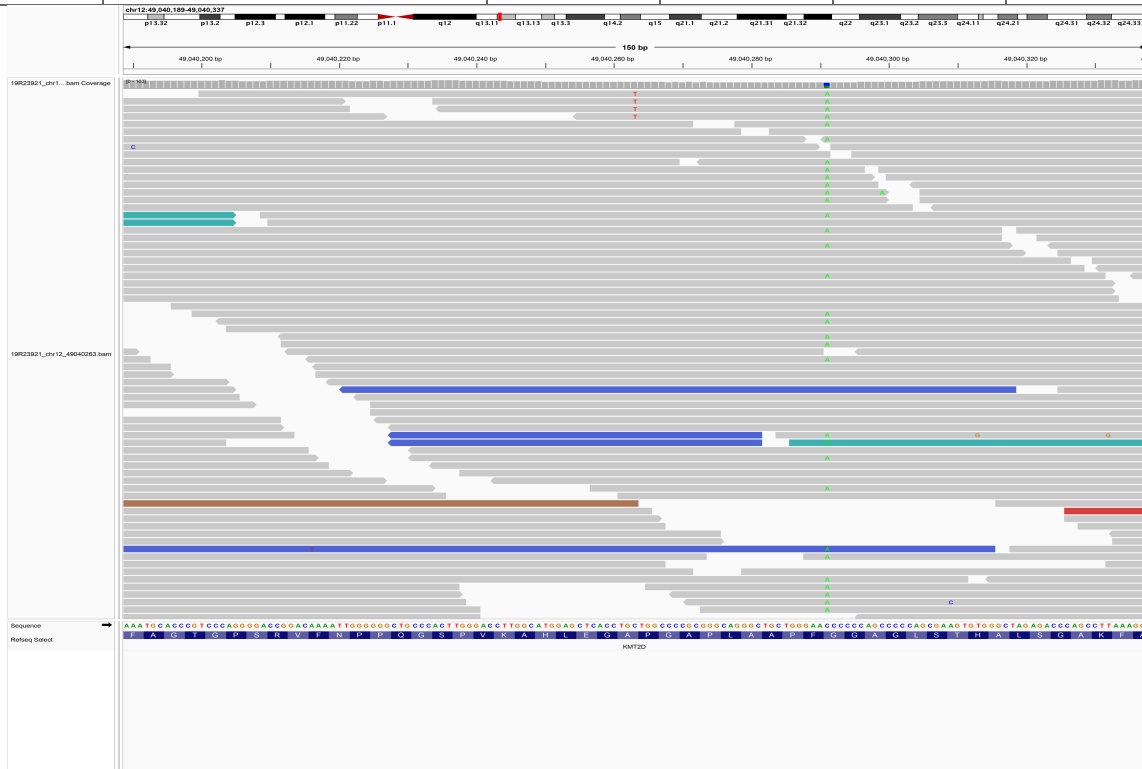

1.73. chr12\_49040361\_G/T

| SampleID | Variants (GRCh38)  | Ref_depth | Alt_depth | Gene  | Consequence      |
|----------|--------------------|-----------|-----------|-------|------------------|
| 18R13000 | chr12_49040361_G/T | 30        | 3         | KMT2D | missense_variant |

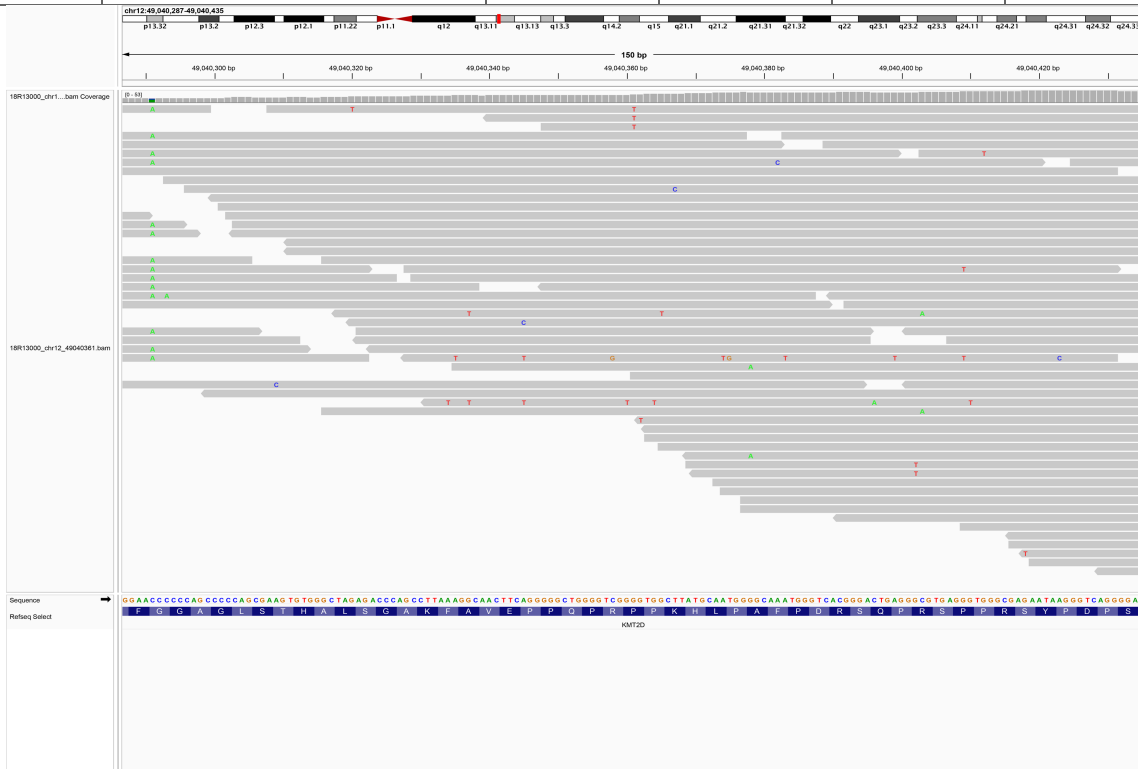

1.74. chr12\_49040490\_G/T

| SampleID | Variants (GRCh38)  | Ref_depth | Alt_depth | Gene  | Consequence      |
|----------|--------------------|-----------|-----------|-------|------------------|
| 18R12960 | chr12_49040490_G/T | 62        | 5         | KMT2D | missense_variant |

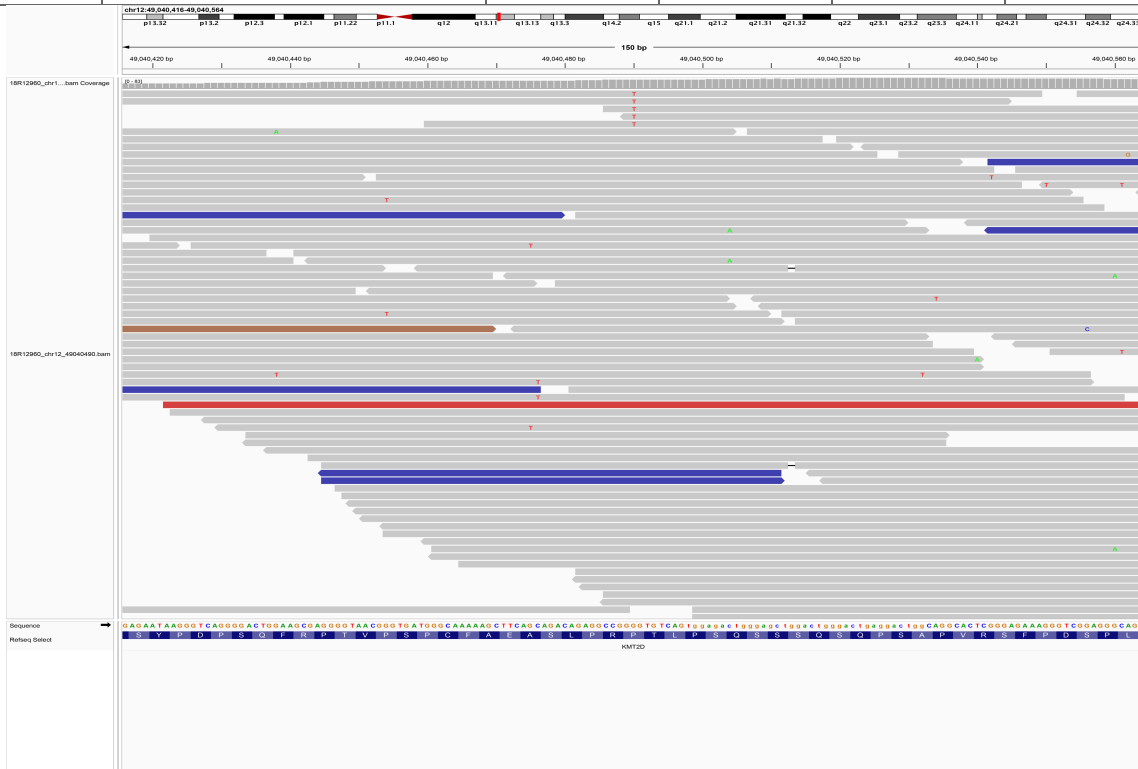



1.76. chr12\_49040610\_G/A

| SampleID | Variants (GRCh38)  | Ref_depth | Alt_depth | Gene         | Consequence      |
|----------|--------------------|-----------|-----------|--------------|------------------|
| 61851    | chr12_49040610_G/A | 22        | 2         | <i>KMT2D</i> | missense_variant |

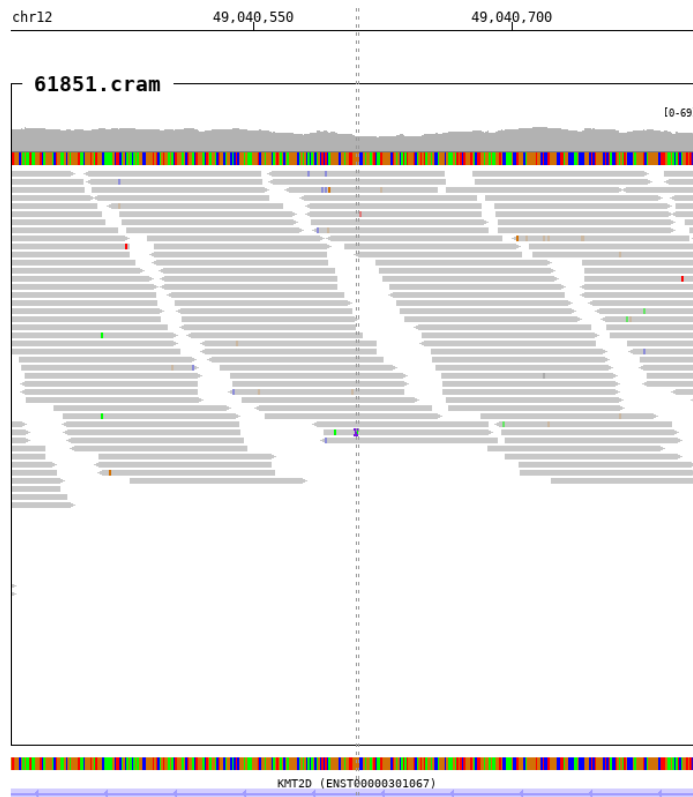

1.77. chr12\_49040626\_G/A

| SampleID        | Variants (GRCh38)  | Ref_depth | Alt_depth | Gene         | Consequence      |
|-----------------|--------------------|-----------|-----------|--------------|------------------|
| 18R08990        | chr12_49040626_G/A | 90        | 14        | <i>KMT2D</i> | missense_variant |
| 18R15048        | chr12_49040626_G/A | 45        | 10        | <i>KMT2D</i> | missense_variant |
| 18R15160        | chr12_49040626_G/A | 46        | 11        | <i>KMT2D</i> | missense_variant |
| AAGC03319<br>4C | chr12_49040626_G/A | 46        | 12        | <i>KMT2D</i> | missense_variant |
| BGPL502         | chr12_49040626_G/A | 27        | 5         | <i>KMT2D</i> | missense_variant |

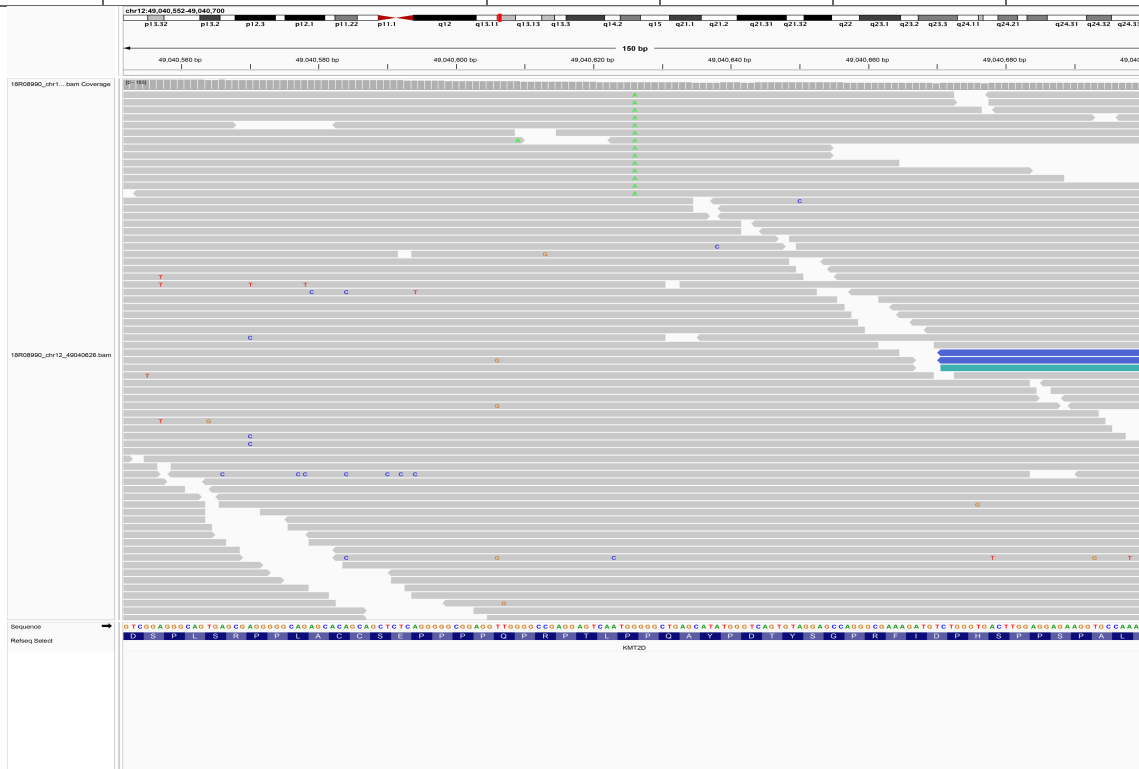

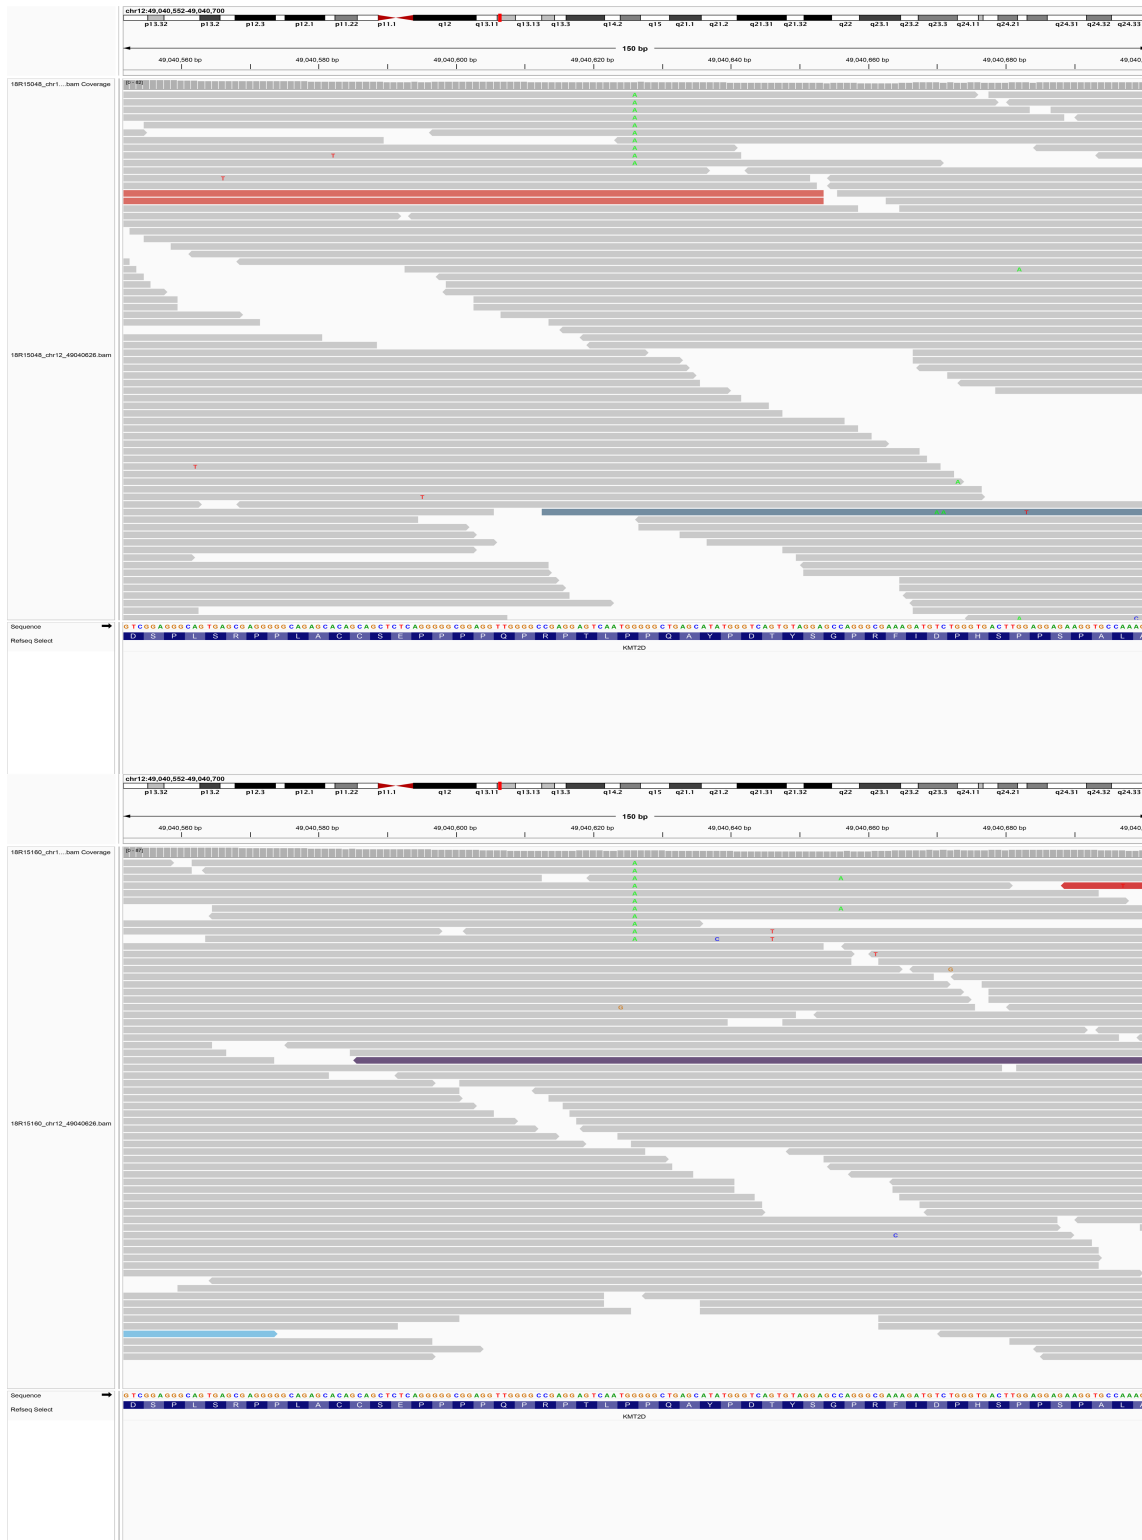

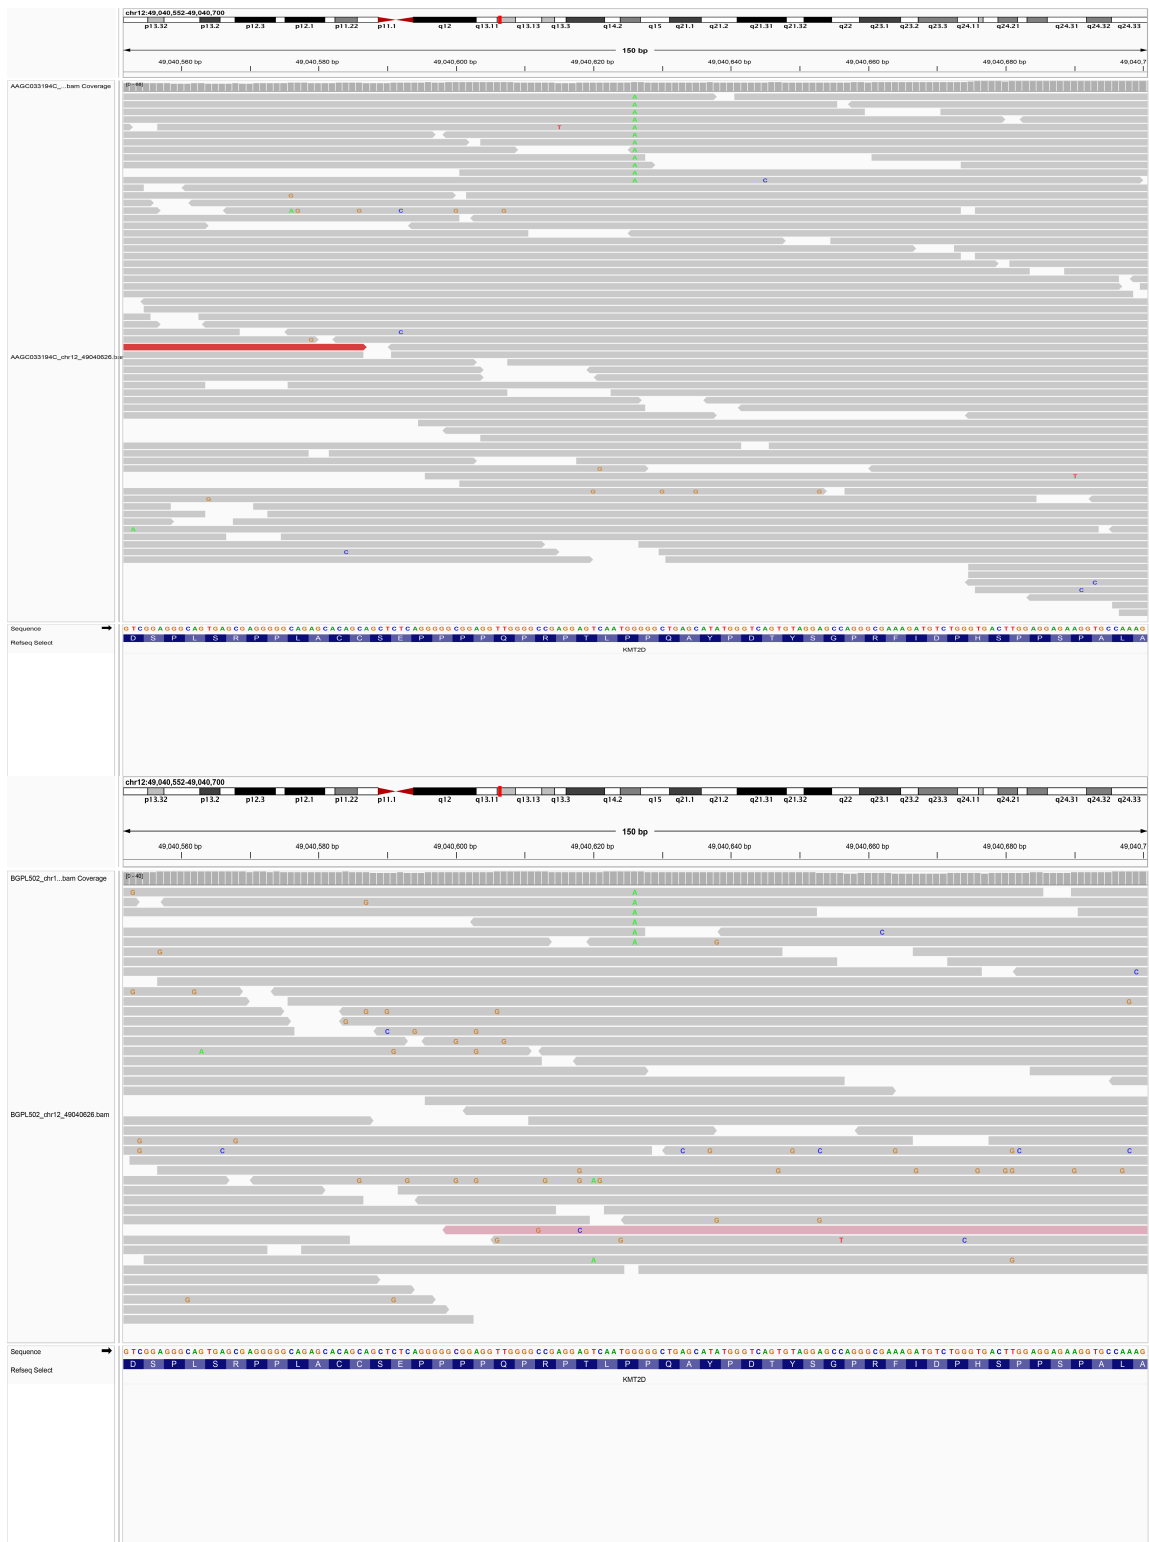

1.78. chr12\_49040661\_C/A

| SampleID | Variants (GRCh38)  | Ref_depth | Alt_depth | Gene  | Consequence      |
|----------|--------------------|-----------|-----------|-------|------------------|
| 18R09454 | chr12_49040661_C/A | 55        | 6         | KMT2D | missense_variant |

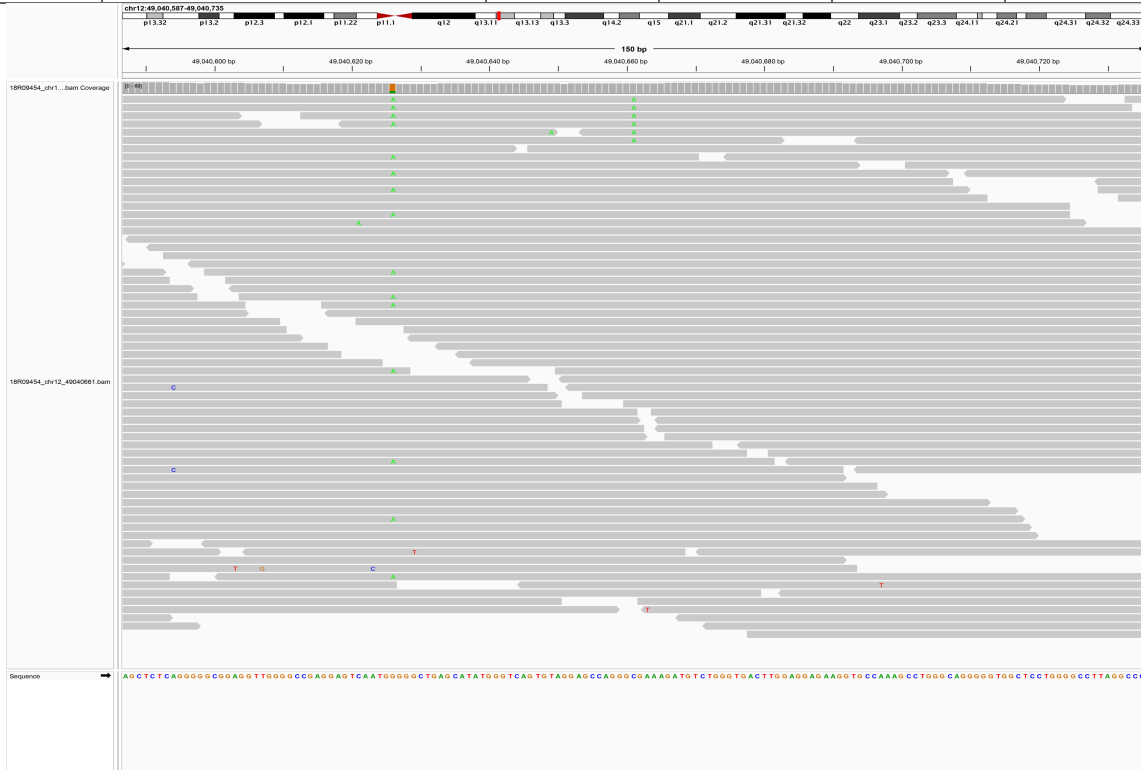

1.79. chr12\_49040662\_G/A

| SampleID | Variants (GRCh38)  | Ref_depth | Alt_depth | Gene         | Consequence      |
|----------|--------------------|-----------|-----------|--------------|------------------|
| 67353    | chr12_49040662_G/A | 19        | 6         | <i>KMT2D</i> | missense_variant |

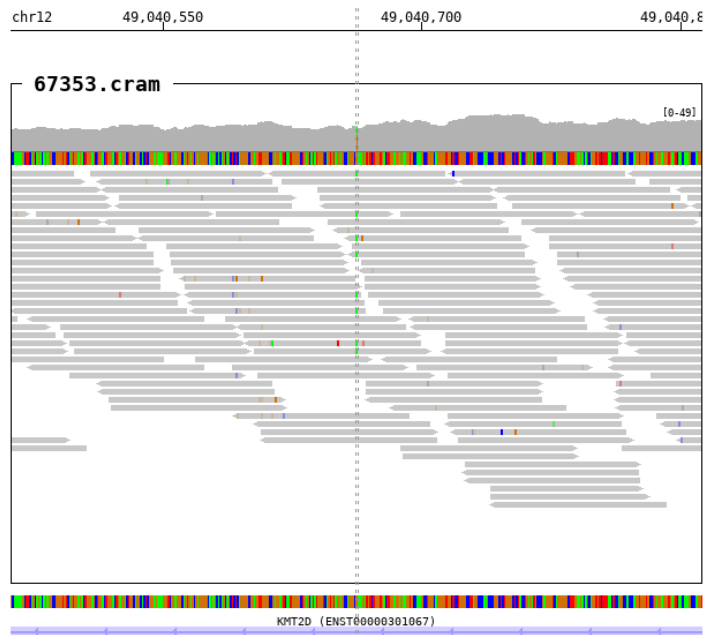

1.80. chr12\_49040718\_T/C

| SampleID       | Variants (GRCh38)  | Ref_depth | Alt_depth | Gene  | Consequence      |
|----------------|--------------------|-----------|-----------|-------|------------------|
| BDF11910170475 | chr12_49040718_T/C | 24        | 3         | KMT2D | missense_variant |

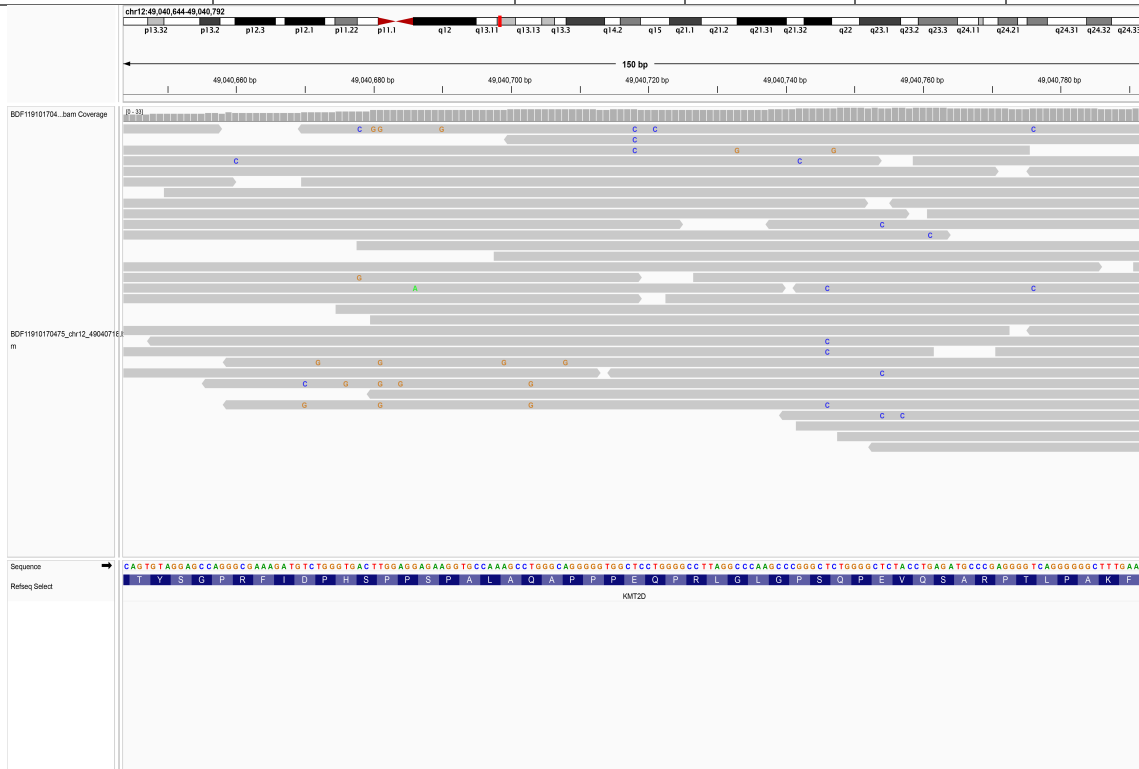

1.81. chr12\_49040724\_G/A

| SampleID | Variants (GRCh38)  | Ref_depth | Alt_depth | Gene  | Consequence      |
|----------|--------------------|-----------|-----------|-------|------------------|
| 18R15160 | chr12_49040724_G/A | 42        | 12        | KMT2D | missense_variant |

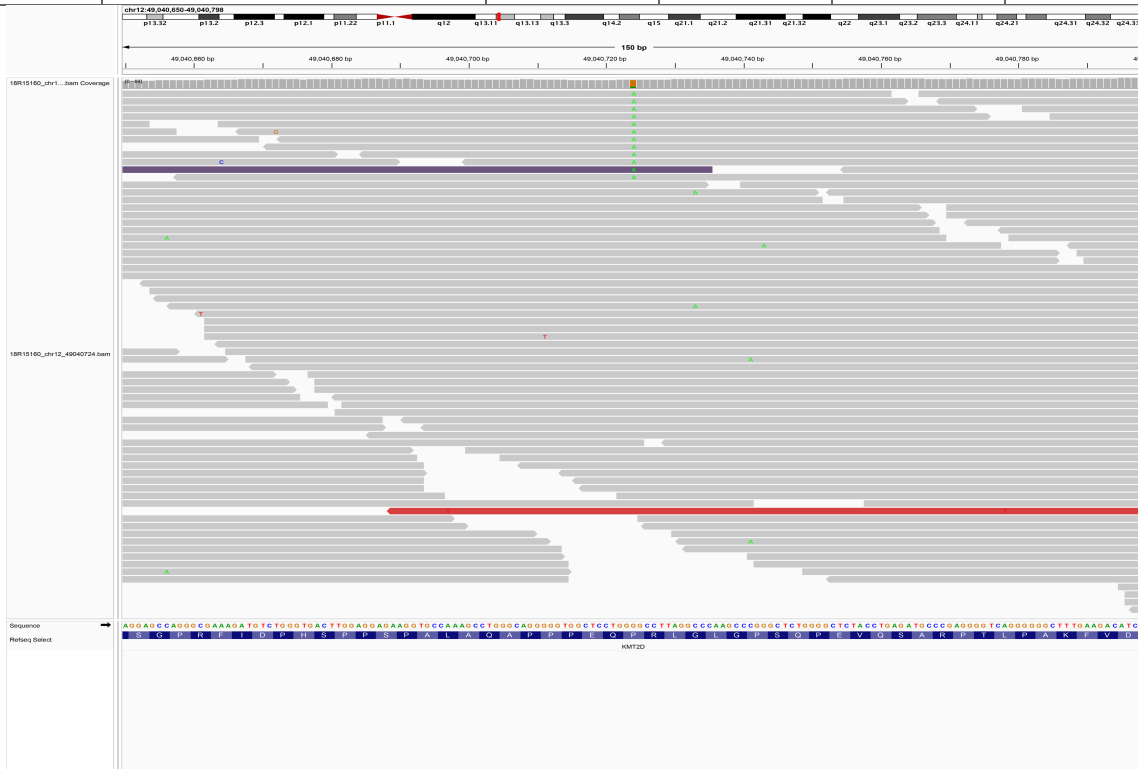

1.82. chr12\_49041084\_G/A

| SampleID | Variants (GRCh38)  | Ref_depth | Alt_depth | Gene  | Consequence      |
|----------|--------------------|-----------|-----------|-------|------------------|
| 19R23522 | chr12_49041084_G/A | 41        | 2         | KMT2D | missense_variant |

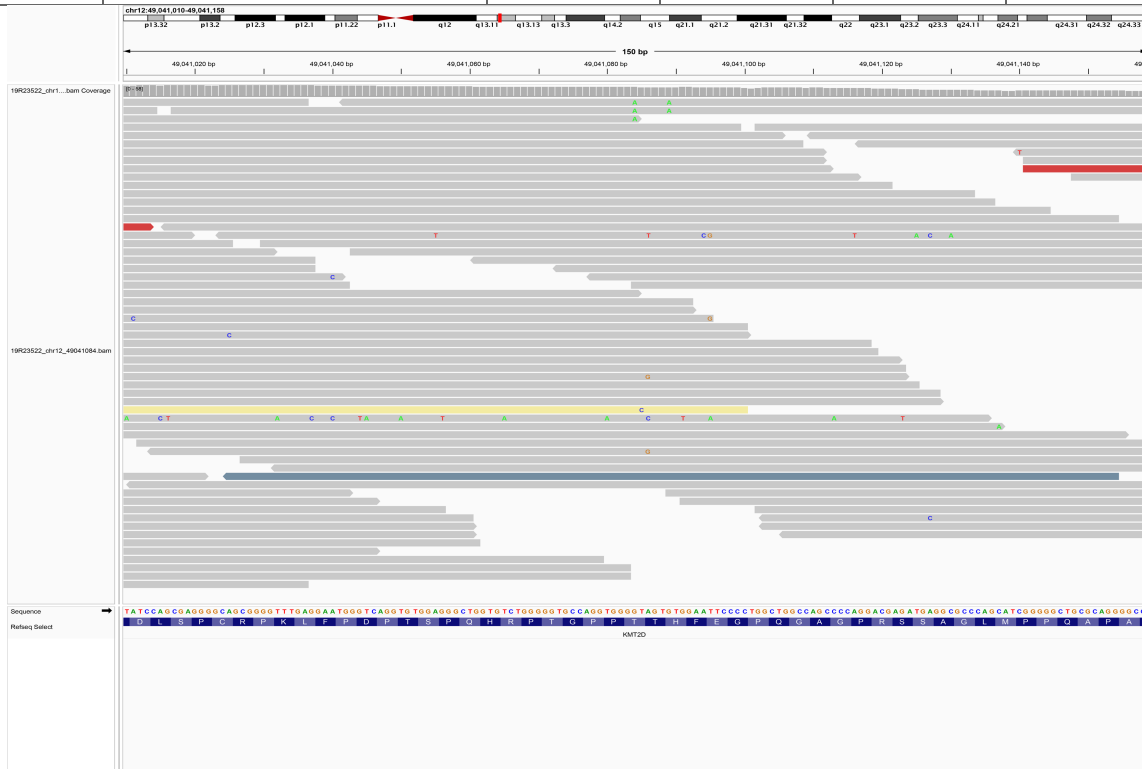

1.83. chr12\_49041169\_T/G

| SampleID | Variants (GRCh38)  | Ref_depth | Alt_depth | Gene  | Consequence      |
|----------|--------------------|-----------|-----------|-------|------------------|
| 17R09655 | chr12_49041169_T/G | 47        | 2         | KMT2D | missense_variant |

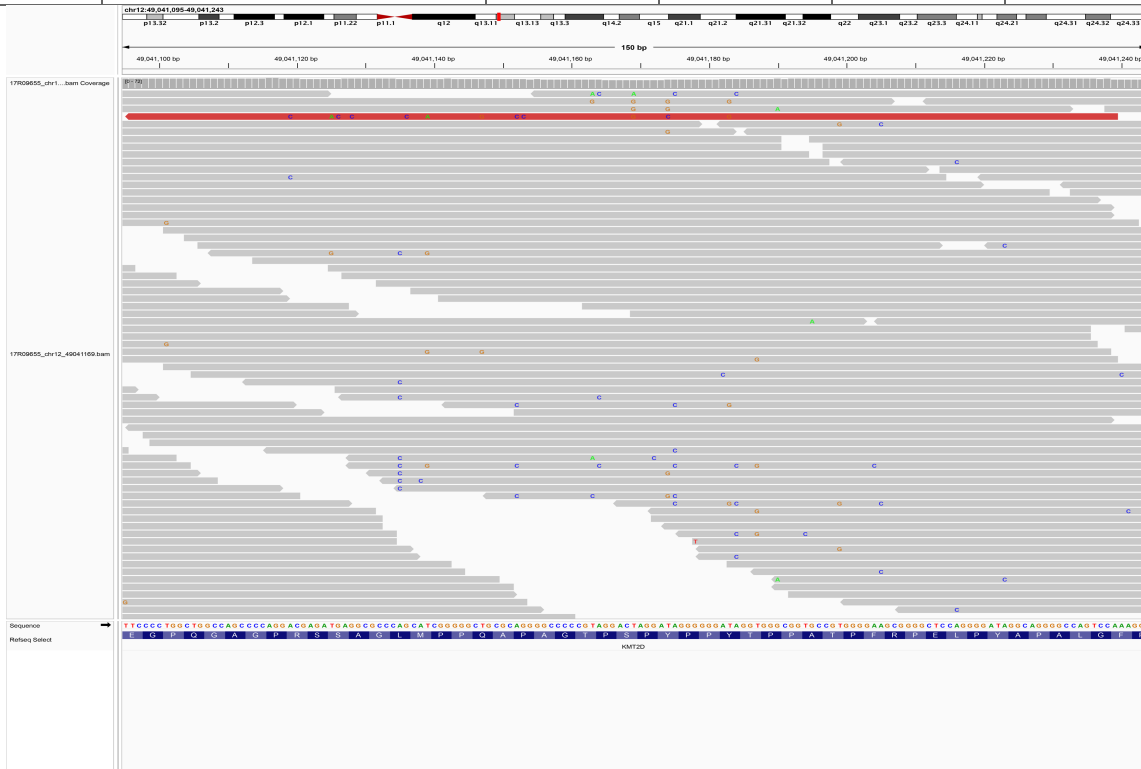

1.84. chr12\_49041172\_G/A

| SampleID  | Variants (GRCh38)  | Ref_depth | Alt_depth | Gene         | Consequence      |
|-----------|--------------------|-----------|-----------|--------------|------------------|
| 110101165 | chr12_49041172_G/A | 36        | 5         | <i>KMT2D</i> | missense_variant |

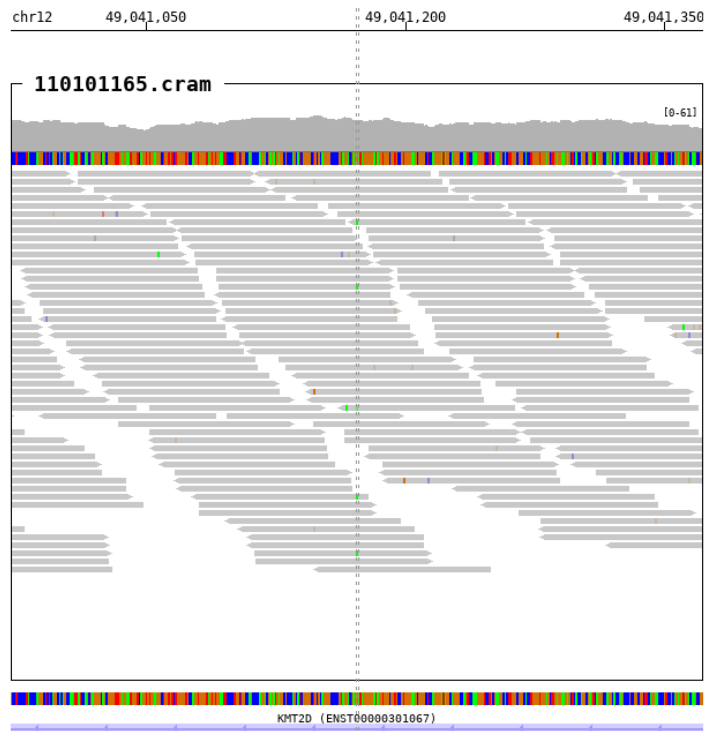

1.85. chr12\_49041174\_T/G

| SampleID | Variants (GRCh38)  | Ref_depth | Alt_depth | Gene  | Consequence      |
|----------|--------------------|-----------|-----------|-------|------------------|
| 17R09655 | chr12_49041174_T/G | 48        | 2         | KMT2D | missense_variant |

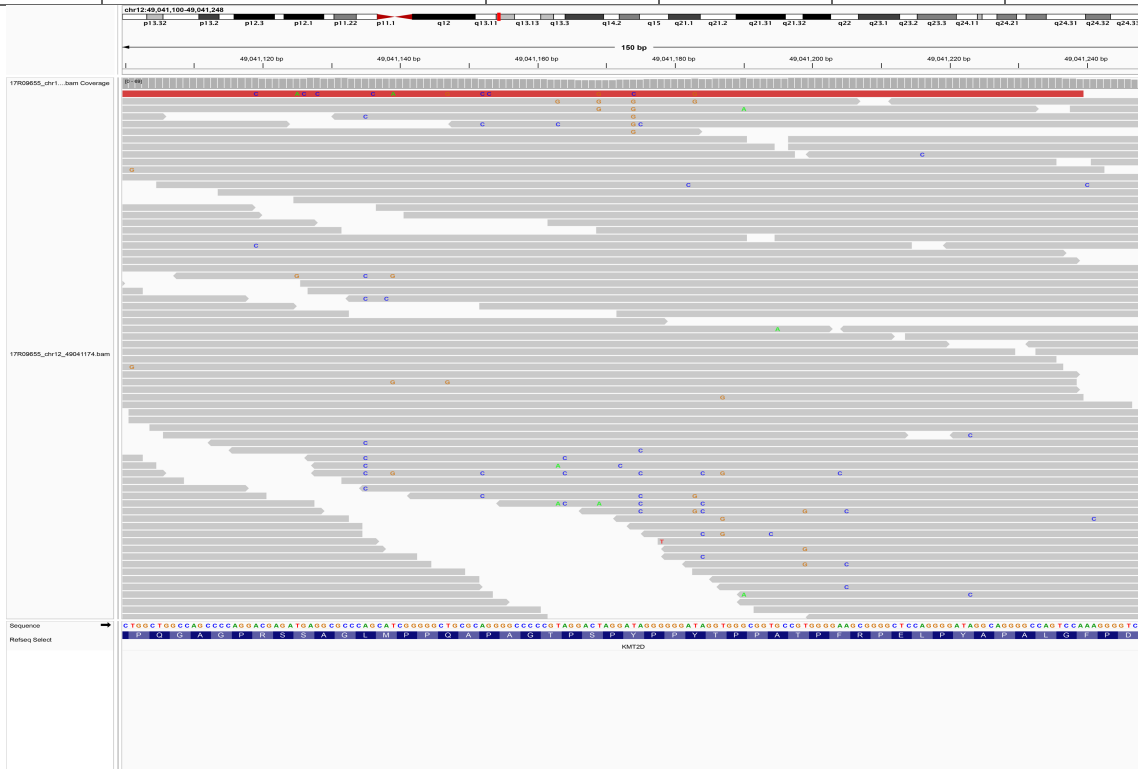

1.86. chr12\_49041202\_G/A

| SampleID | Variants (GRCh38)  | Ref_depth | Alt_depth | Gene  | Consequence      |
|----------|--------------------|-----------|-----------|-------|------------------|
| 18R12718 | chr12_49041202_G/A | 57        | 4         | KMT2D | missense_variant |

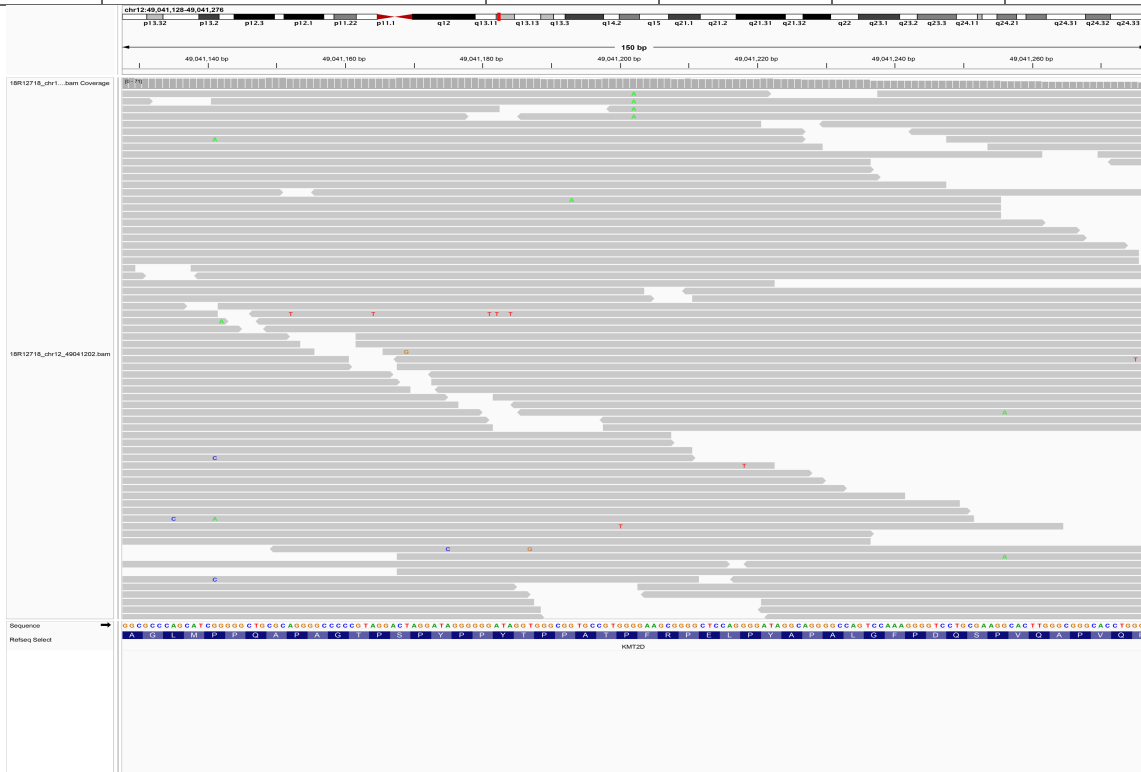

chr12\_49041300\_C/T

| SampleID | Variants (GRCh38)  | Ref_depth | Alt_depth | Gene         | Consequence      |
|----------|--------------------|-----------|-----------|--------------|------------------|
| 10671923 | chr12_49041300_C/T | 17        | 6         | <i>KMT2D</i> | missense_variant |

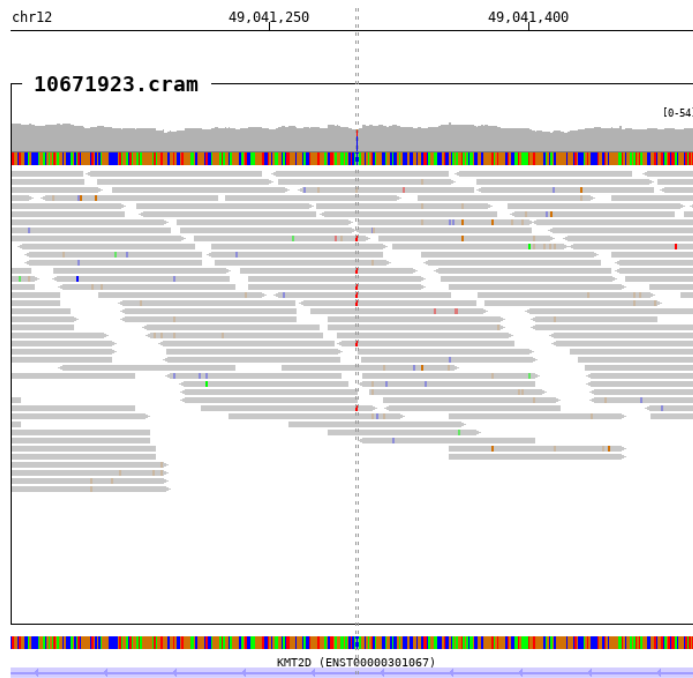

1.87. chr12\_49041338\_CT/GC/GT

| SampleID | Variants (GRCh38)  | Ref_depth | Alt_depth | Gene         | Consequence      |
|----------|--------------------|-----------|-----------|--------------|------------------|
| 11110266 | chr12_49041338_C/G | 17        | 5         | <i>KMT2D</i> | missense_variant |

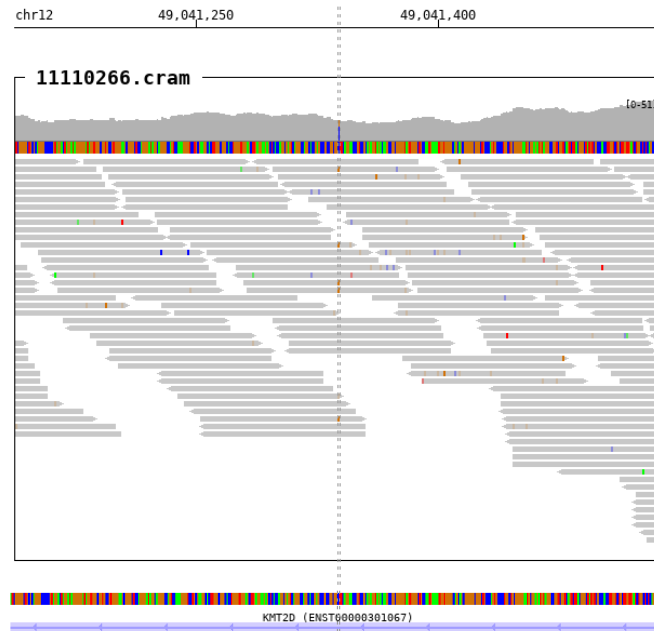

1.88. chr12\_49041447\_G/A

| SampleID | Variants (GRCh38)  | Ref_depth | Alt_depth | Gene  | Consequence      |
|----------|--------------------|-----------|-----------|-------|------------------|
| 18R09389 | chr12_49041447_G/A | 51        | 4         | KMT2D | missense_variant |

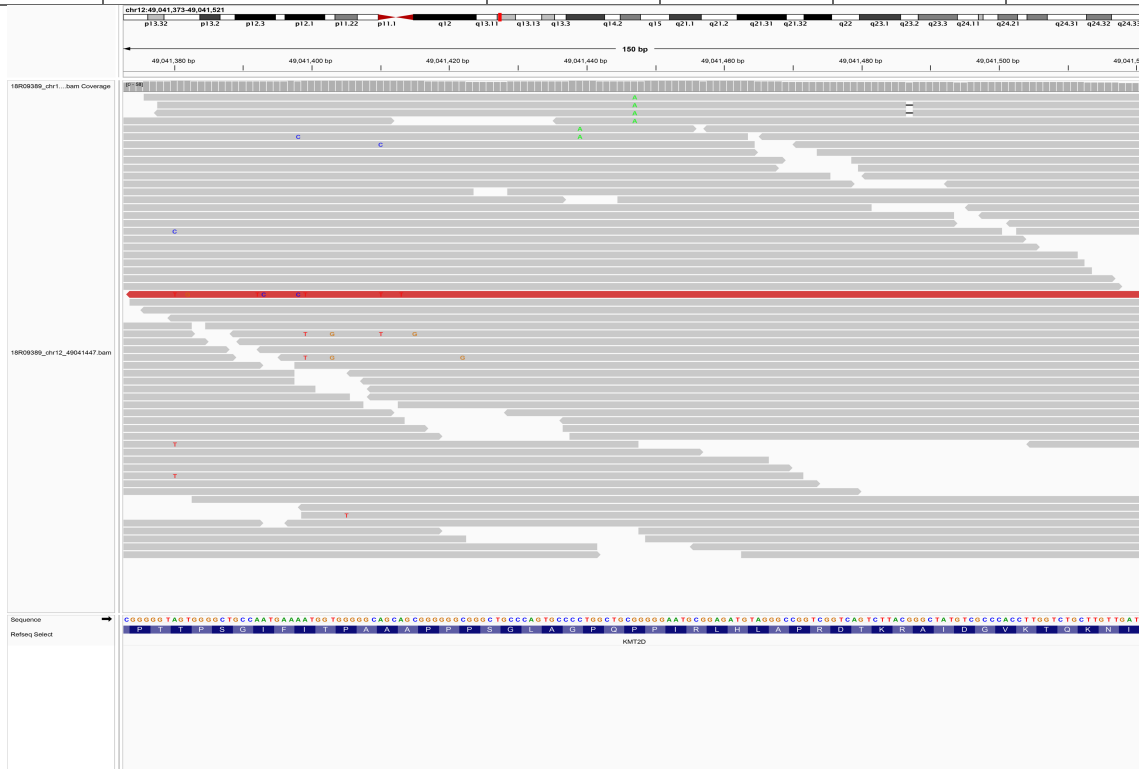

1.89. chr12\_49041451\_G/C

| SampleID | Variants (GRCh38)  | Ref_depth | Alt_depth | Gene  | Consequence      |
|----------|--------------------|-----------|-----------|-------|------------------|
| 19R23480 | chr12_49041451_G/C | 41        | 15        | KMT2D | missense_variant |

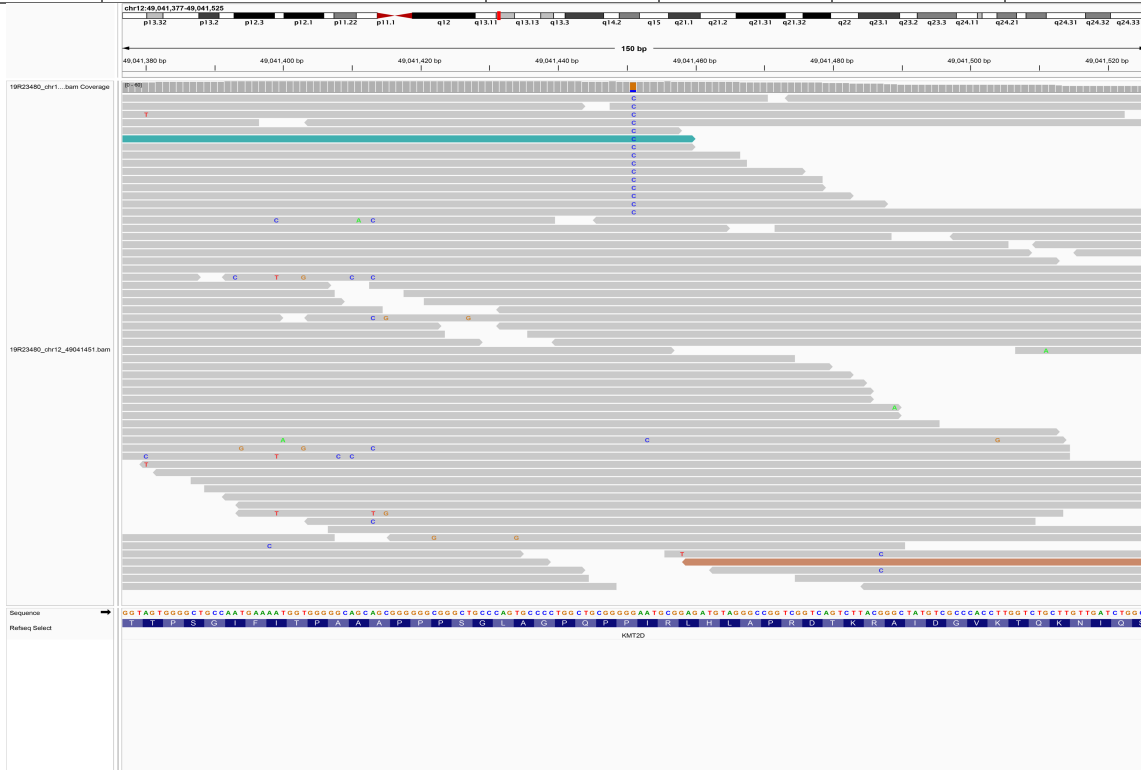

1.90. chr12\_49041471\_G/A

| SampleID | Variants (GRCh38)  | Ref_depth | Alt_depth | Gene  | Consequence      |
|----------|--------------------|-----------|-----------|-------|------------------|
| 18R12868 | chr12_49041471_G/A | 47        | 4         | KMT2D | missense_variant |

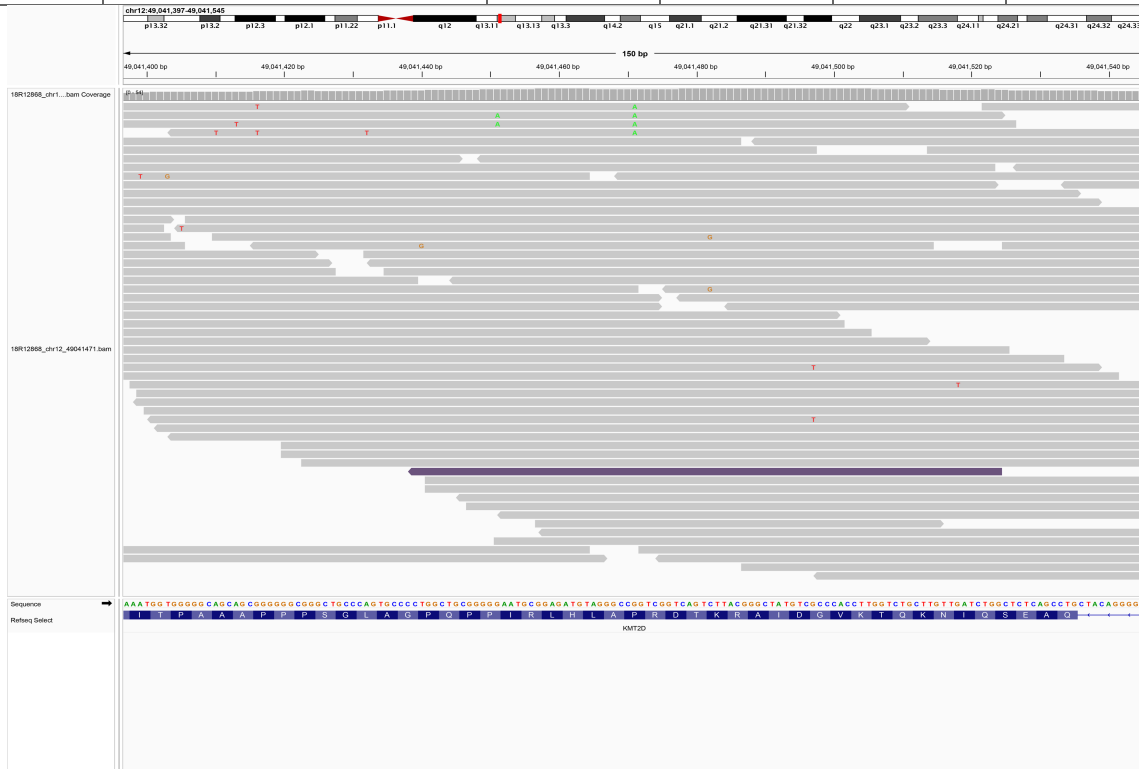

1.91. chr12\_49041978\_C/T

| SampleID    | Variants (GRCh38)  | Ref_depth | Alt_depth | Gene  | Consequence      |
|-------------|--------------------|-----------|-----------|-------|------------------|
| AAGC031733D | chr12_49041978_C/T | 20        | 4         | KMT2D | missense_variant |

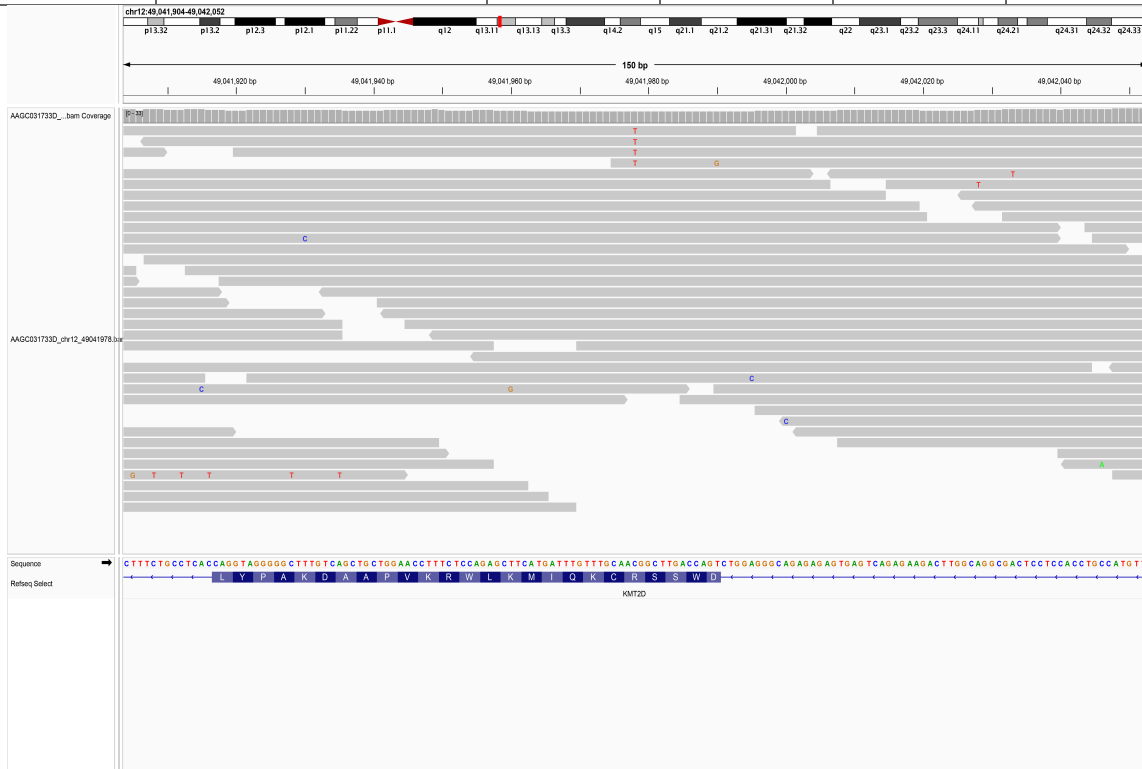

1.92. chr12\_49042127\_G/T

| SampleID | Variants (GRCh38)  | Ref_depth | Alt_depth | Gene         | Consequence      |
|----------|--------------------|-----------|-----------|--------------|------------------|
| 18R19194 | chr12_49042127_G/T | 53        | 4         | <i>KMT2D</i> | missense_variant |

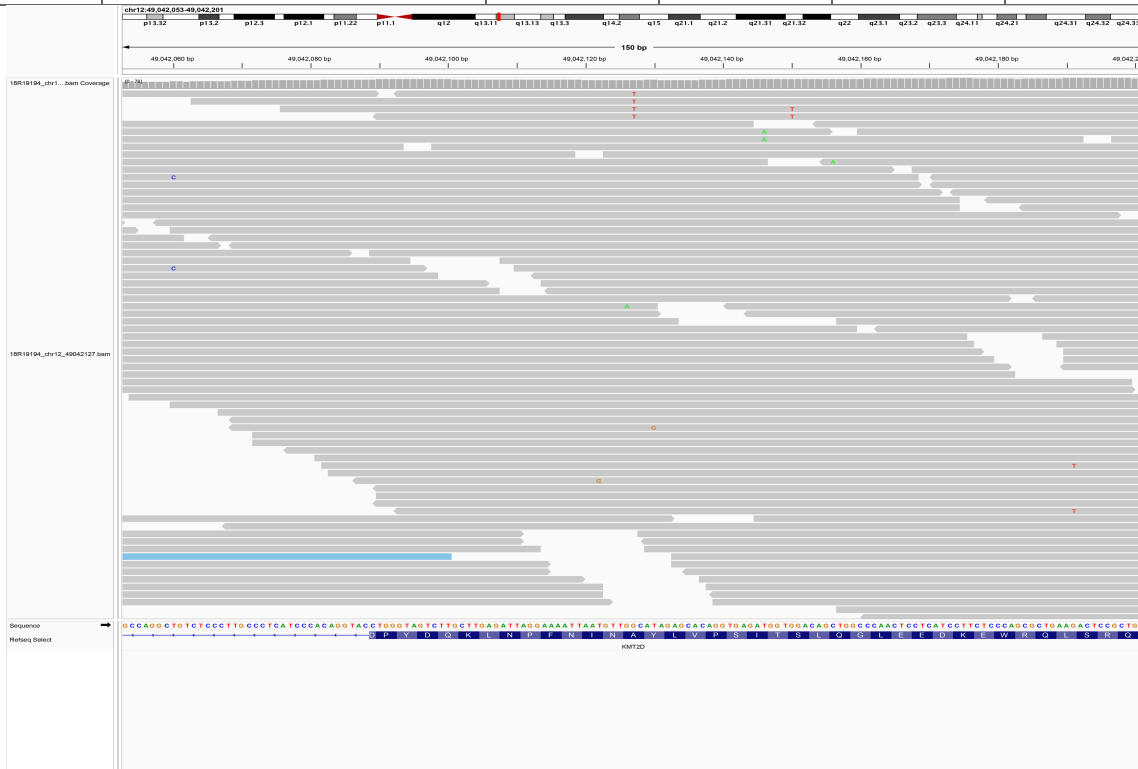

1.93. chr12\_49042764\_G/A

| SampleID    | Variants (GRCh38)  | Ref_depth | Alt_depth | Gene         | Consequence      |
|-------------|--------------------|-----------|-----------|--------------|------------------|
| AAGC033041C | chr12_49042764_G/A | 52        | 23        | <i>KMT2D</i> | missense_variant |
| AAGC033062D | chr12_49042764_G/A | 23        | 7         | <i>KMT2D</i> | missense_variant |

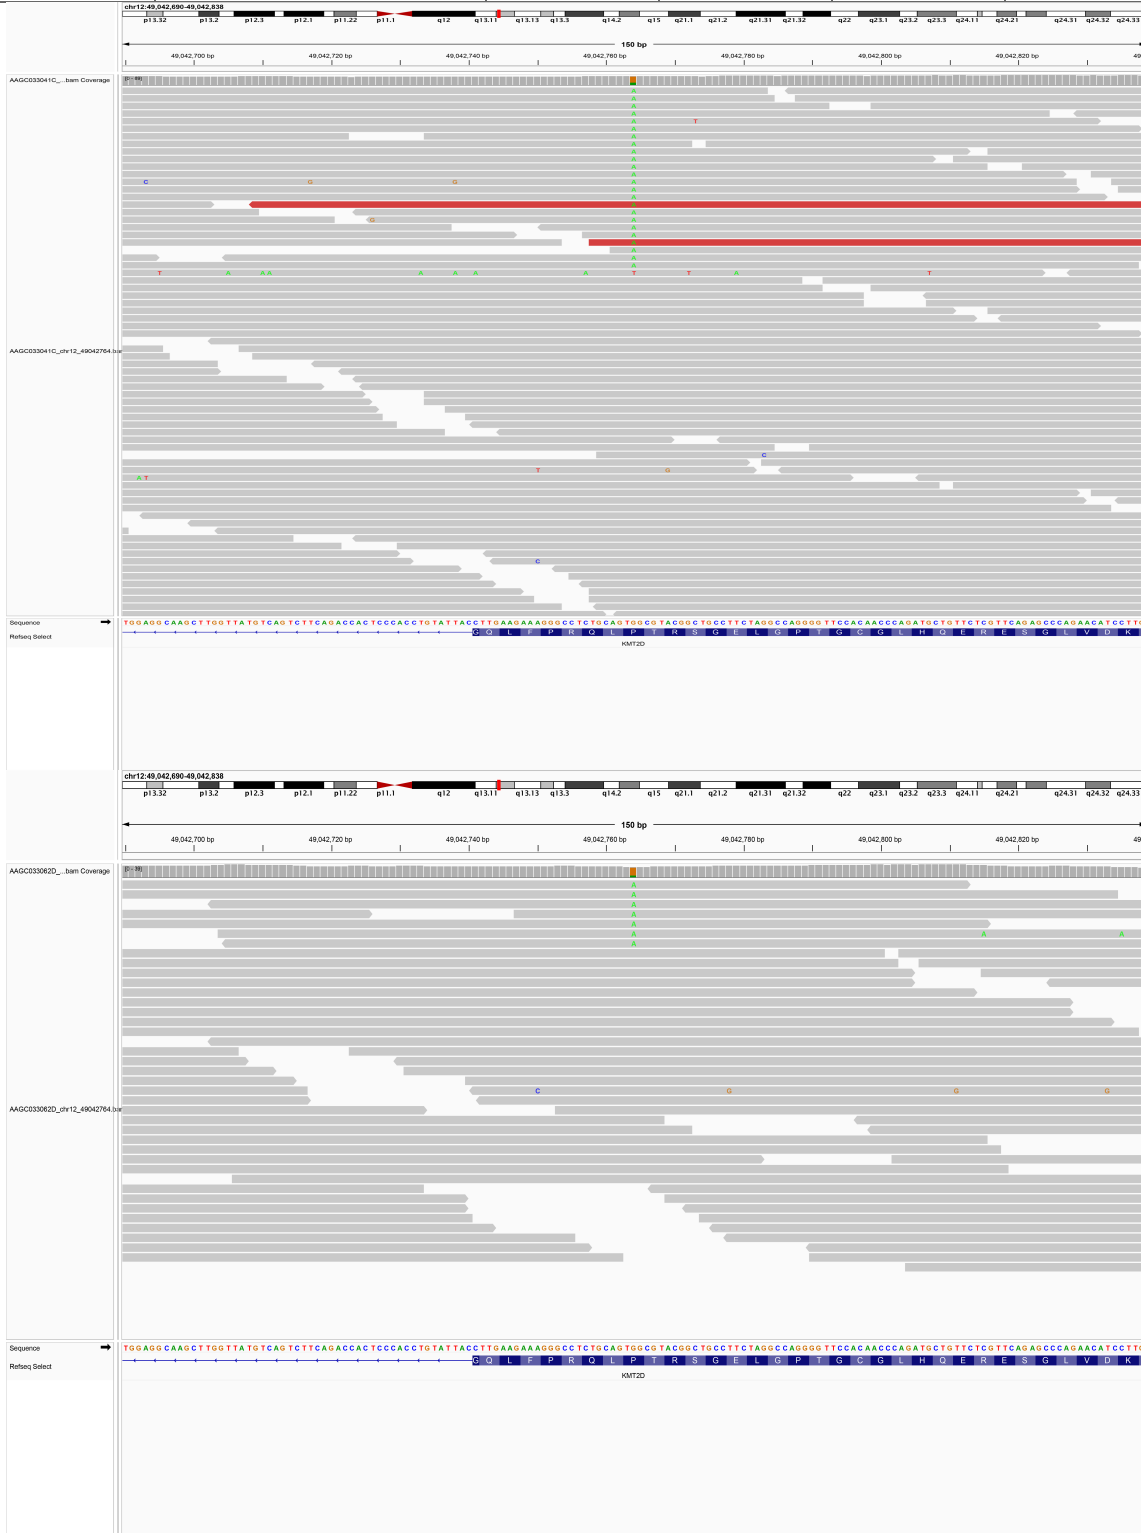

1.94. chr12\_49043171\_C/A

| SampleID | Variants (GRCh38)  | Ref_depth | Alt_depth | Gene  | Consequence      |
|----------|--------------------|-----------|-----------|-------|------------------|
| 18R15037 | chr12_49043171_C/A | 42        | 4         | KMT2D | missense_variant |

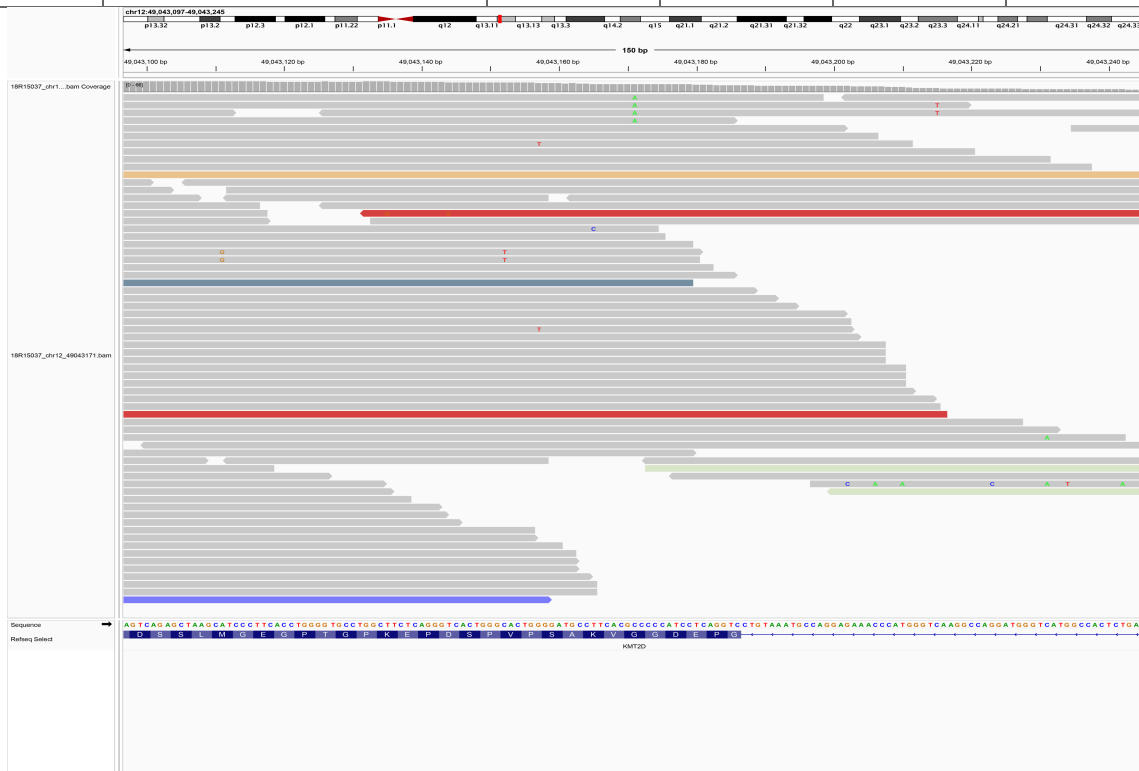

1.95. chr12\_49043745\_C/A

| SampleID | Variants (GRCh38)  | Ref_depth | Alt_depth | Gene  | Consequence      |
|----------|--------------------|-----------|-----------|-------|------------------|
| 19R23780 | chr12_49043745_C/A | 61        | 3         | KMT2D | missense_variant |

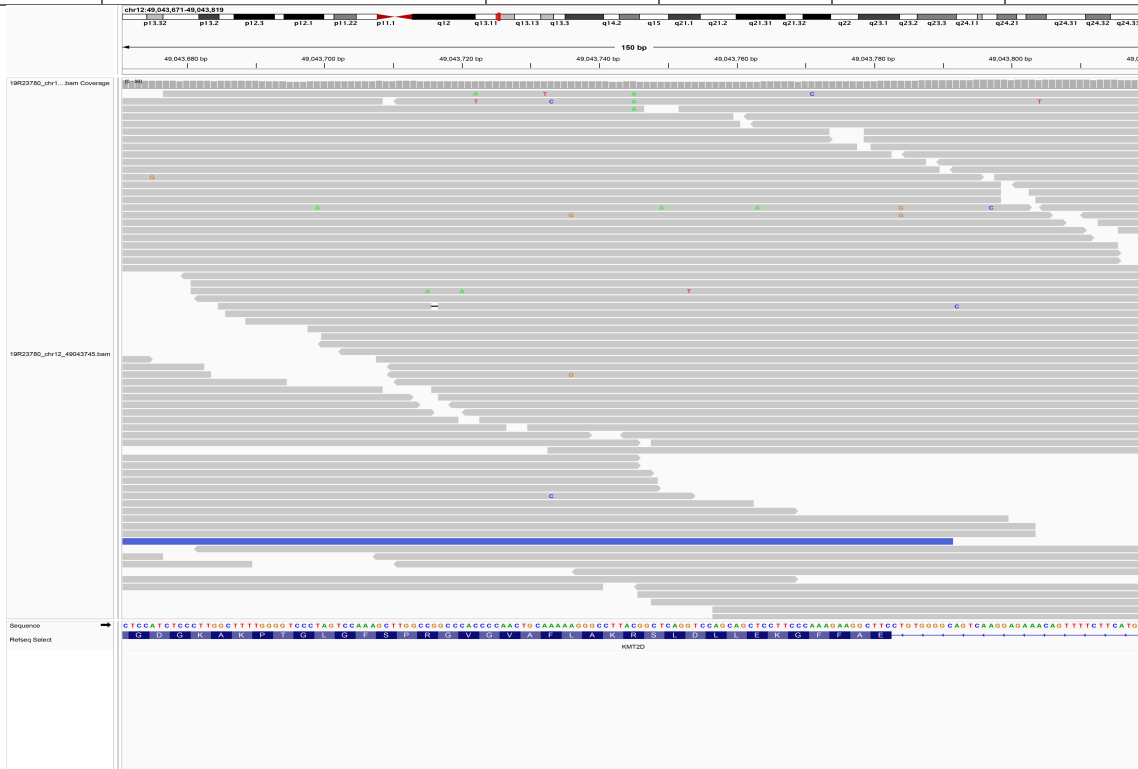

1.96. chr12\_49043778\_G/T

| SampleID | Variants (GRCh38)  | Ref_depth | Alt_depth | Gene  | Consequence      |
|----------|--------------------|-----------|-----------|-------|------------------|
| 18R15075 | chr12_49043778_G/T | 45        | 3         | KMT2D | missense_variant |

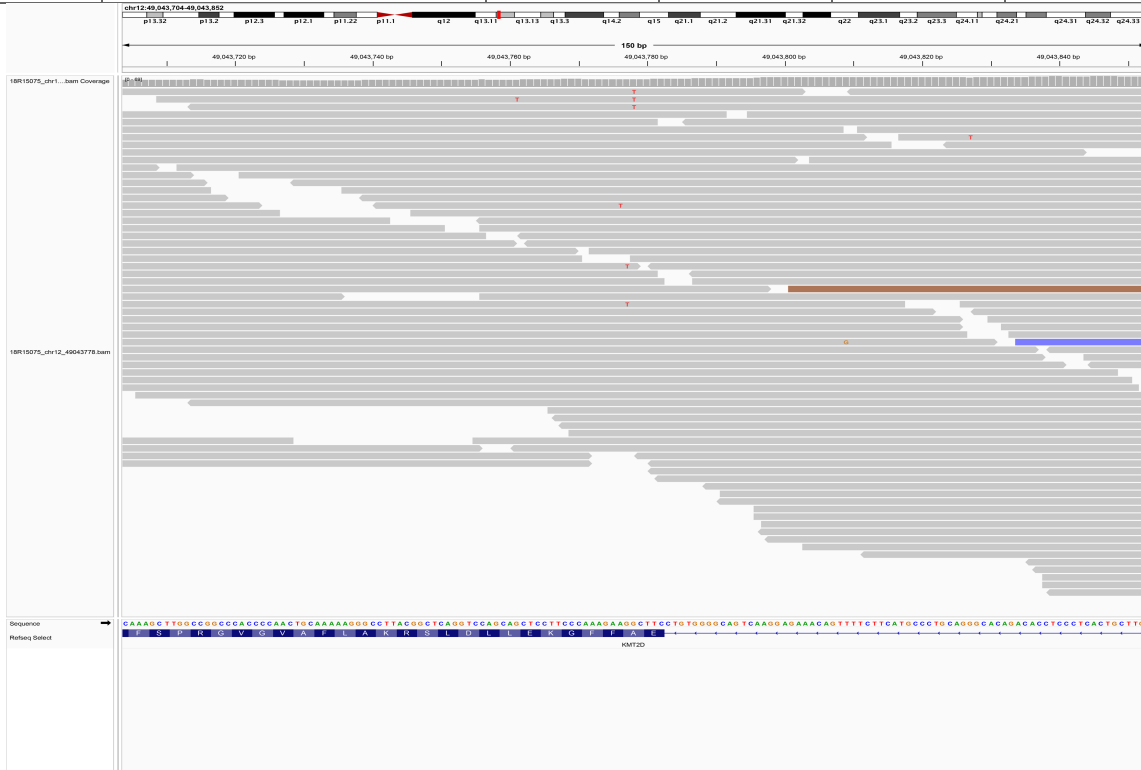

1.97. chr12\_49044253\_T/C

| SampleID   | Variants (GRCh38)  | Ref_depth | Alt_depth | Gene         | Consequence      |
|------------|--------------------|-----------|-----------|--------------|------------------|
| 17R04998   | chr12_49044253_T/C | 174       | 5         | <i>KMT2D</i> | missense_variant |
| CNS0134133 | chr12_49044253_T/C | 39        | 3         | <i>KMT2D</i> | missense_variant |

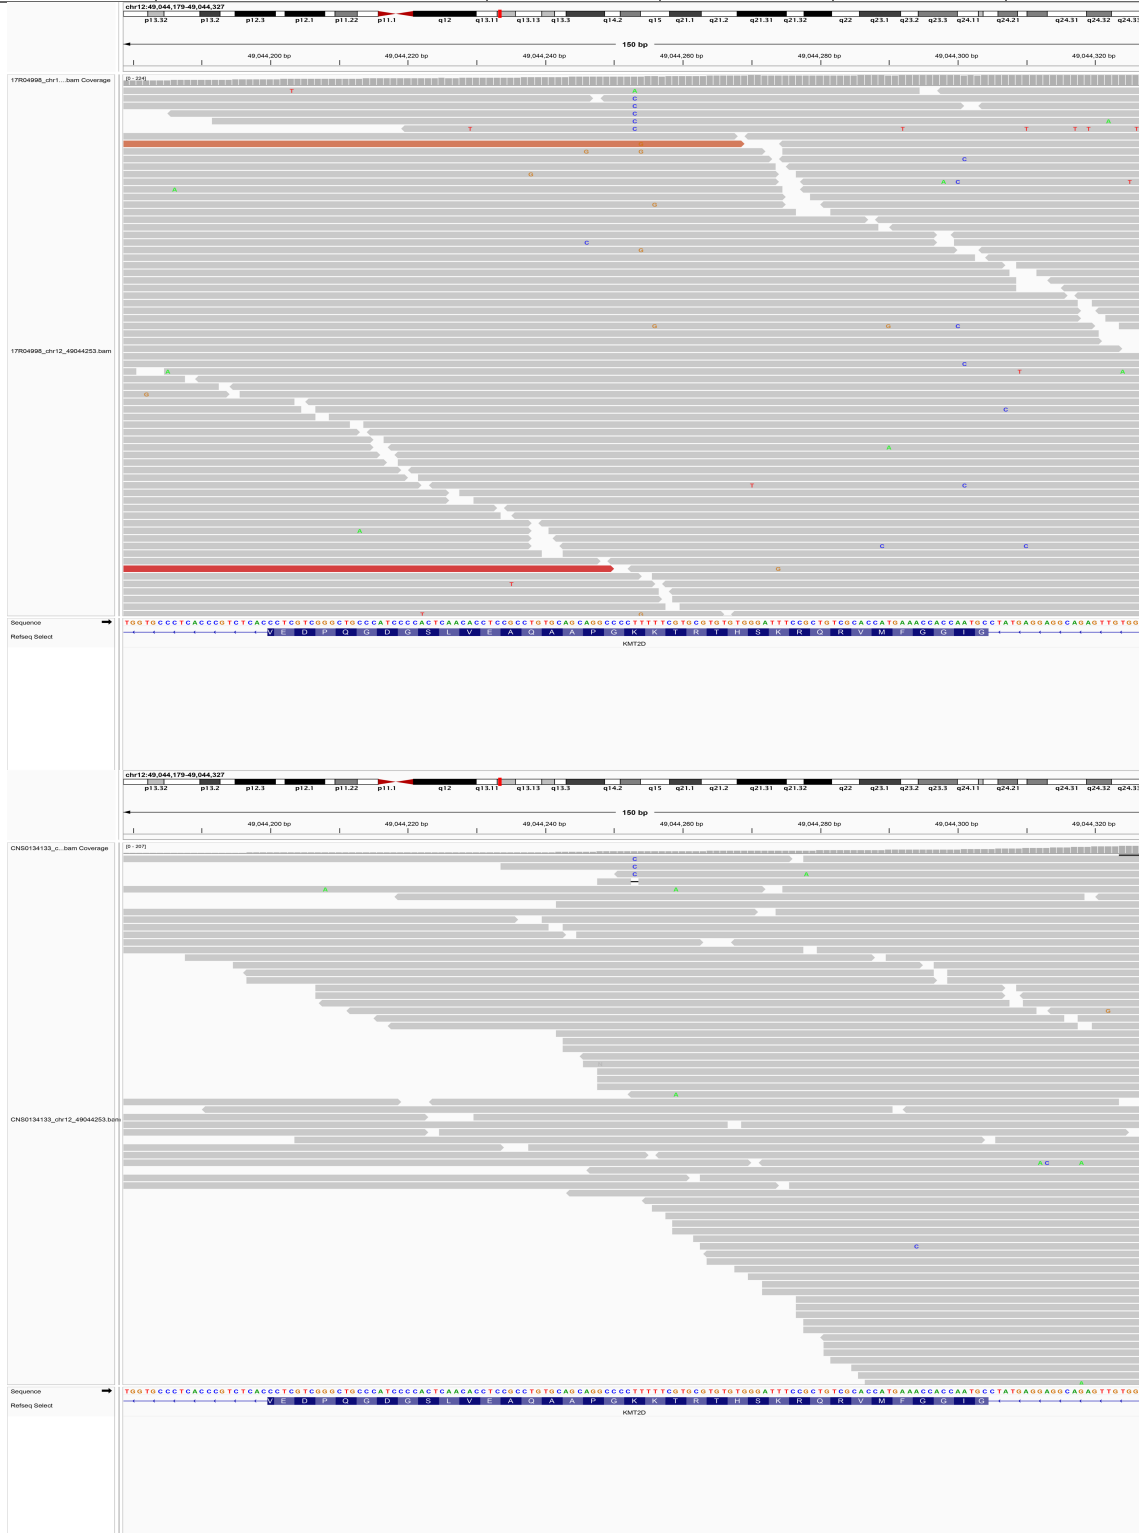

1.98. chr12\_49044267\_G/C

| SampleID | Variants (GRCh38)  | Ref_depth | Alt_depth | Gene  | Consequence      |
|----------|--------------------|-----------|-----------|-------|------------------|
| 18R12975 | chr12_49044267_G/C | 36        | 3         | KMT2D | missense_variant |

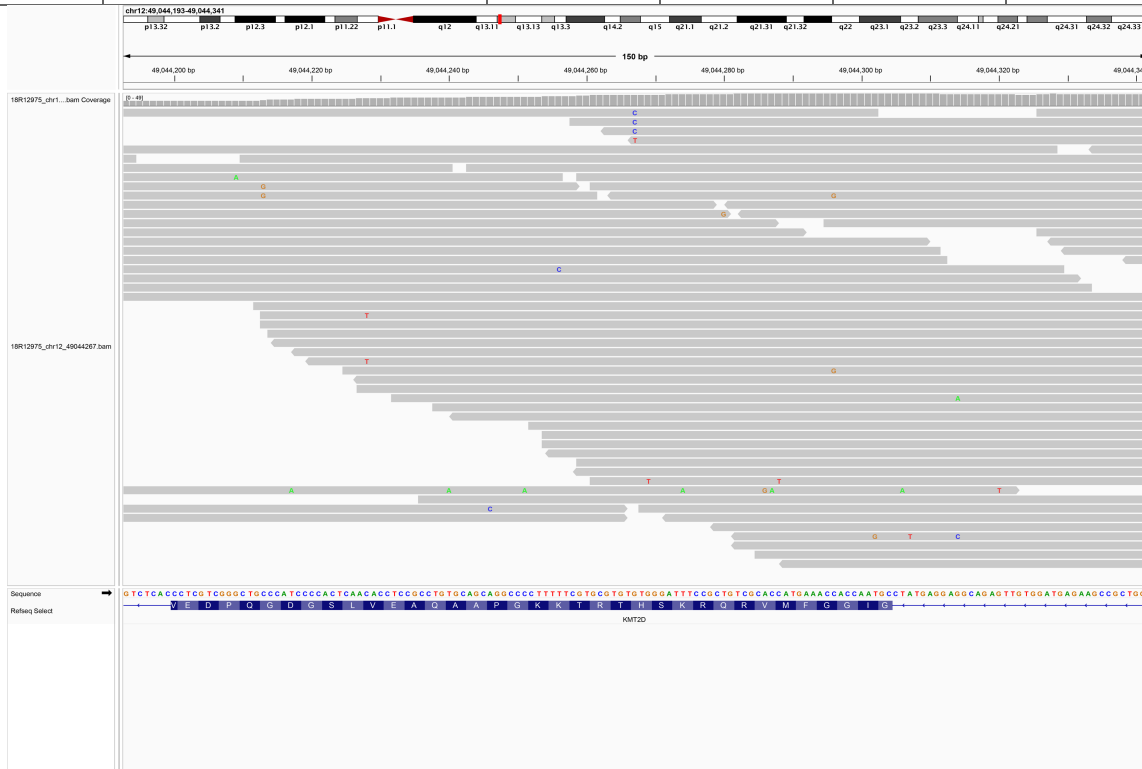

1.99. chr12\_49045936\_C/T

| SampleID  | Variants (GRCh38)  | Ref_depth | Alt_depth | Gene         | Consequence      |
|-----------|--------------------|-----------|-----------|--------------|------------------|
| 112301667 | chr12_49045936_C/T | 38        | 16        | <i>KMT2D</i> | missense_variant |

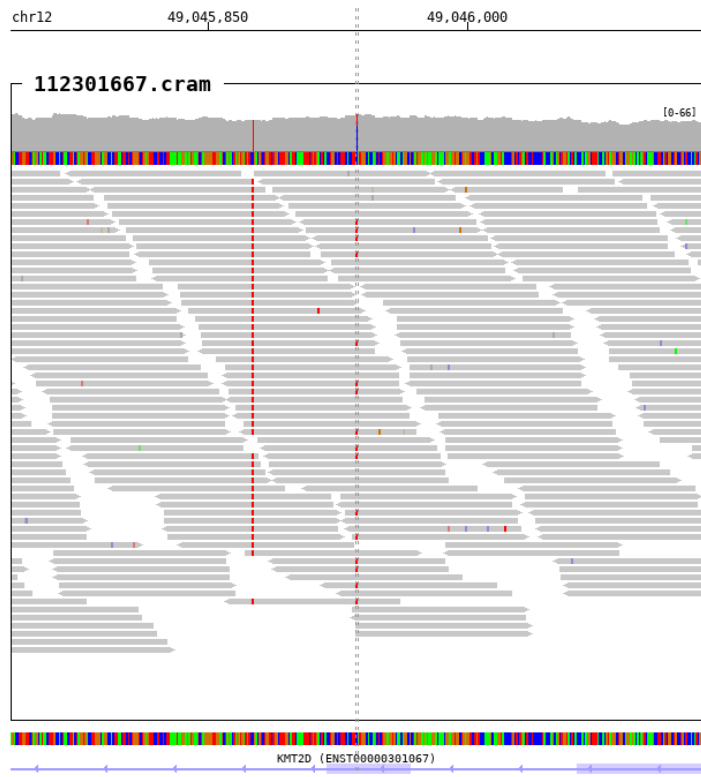

1.100. chr12\_49046166\_T/C

| SampleID | Variants (GRCh38)  | Ref_depth | Alt_depth | Gene         | Consequence      |
|----------|--------------------|-----------|-----------|--------------|------------------|
| 10511592 | chr12_49046166_T/C | 38        | 4         | <i>KMT2D</i> | missense_variant |

chr12 49,046,050 49,046,200 49,046,350

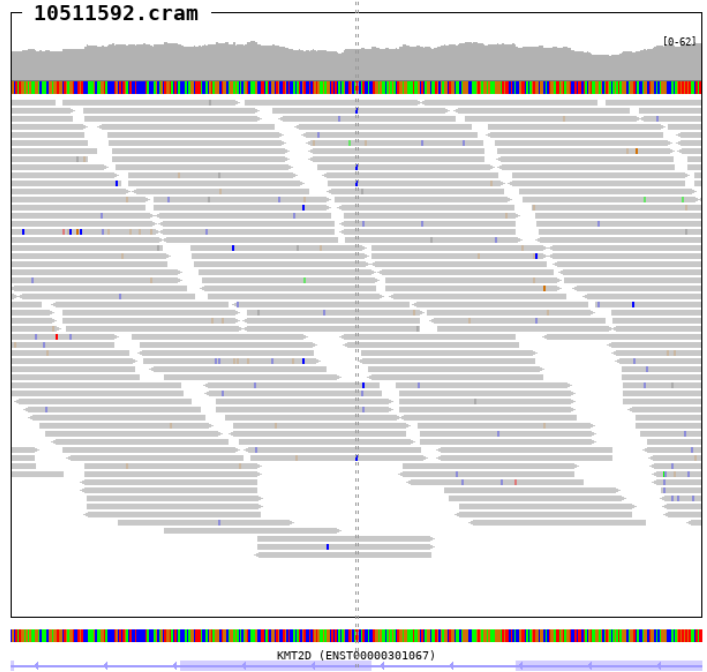

1.101. chr12\_49046275\_C/G

| SampleID | Variants (GRCh38)  | Ref_depth | Alt_depth | Gene         | Consequence      |
|----------|--------------------|-----------|-----------|--------------|------------------|
| 10302494 | chr12_49046275_C/G | 35        | 5         | <i>KMT2D</i> | missense_variant |

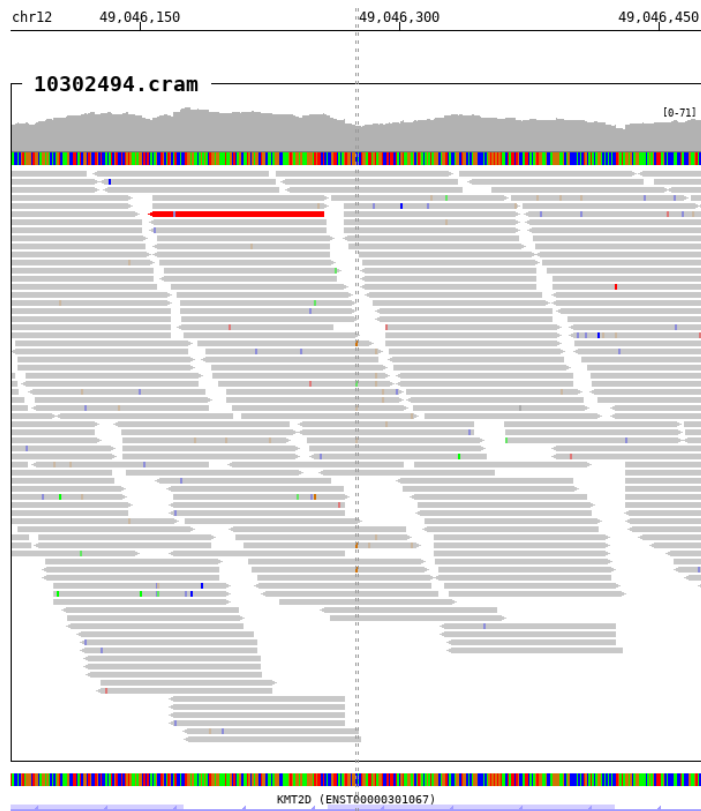

1.102. chr12\_49046392\_G/A

| SampleID | Variants (GRCh38)  | Ref_depth | Alt_depth | Gene  | Consequence      |
|----------|--------------------|-----------|-----------|-------|------------------|
| 19R23579 | chr12_49046392_G/A | 56        | 4         | KMT2D | missense_variant |

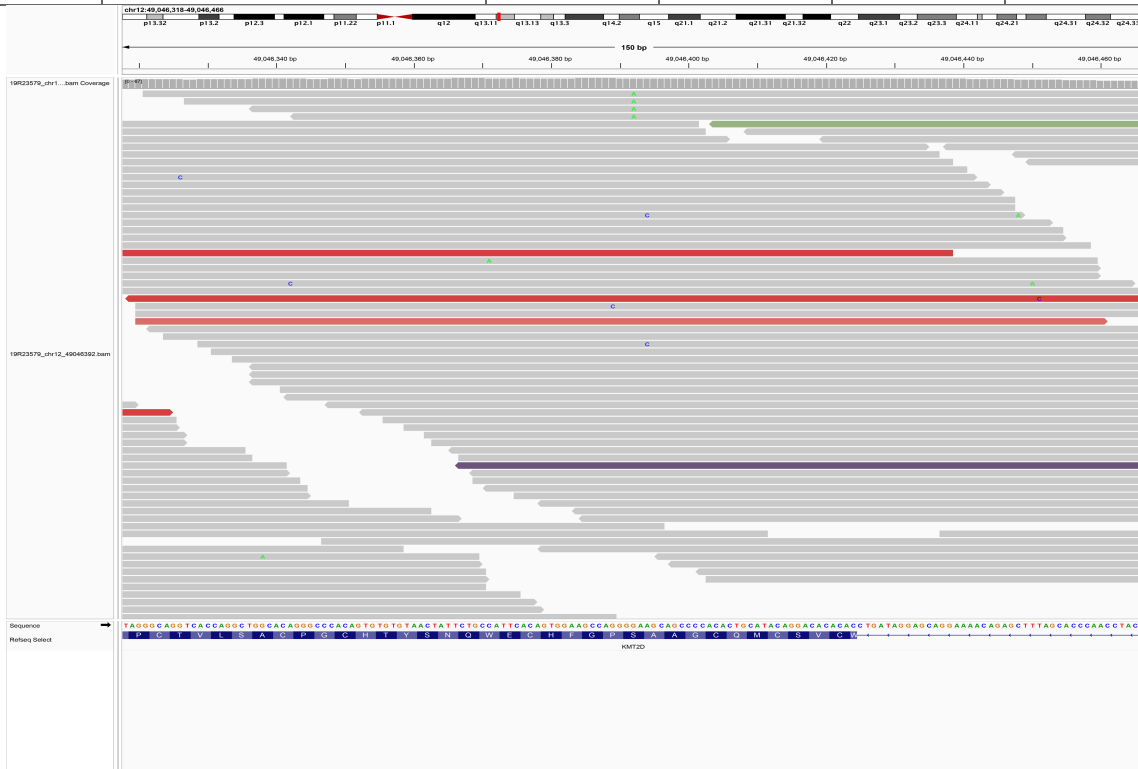

1.103. chr12\_49046702\_A/G

| SampleID | Variants (GRCh38)  | Ref_depth | Alt_depth | Gene  | Consequence      |
|----------|--------------------|-----------|-----------|-------|------------------|
| 19R23934 | chr12_49046702_A/G | 44        | 4         | KMT2D | missense_variant |

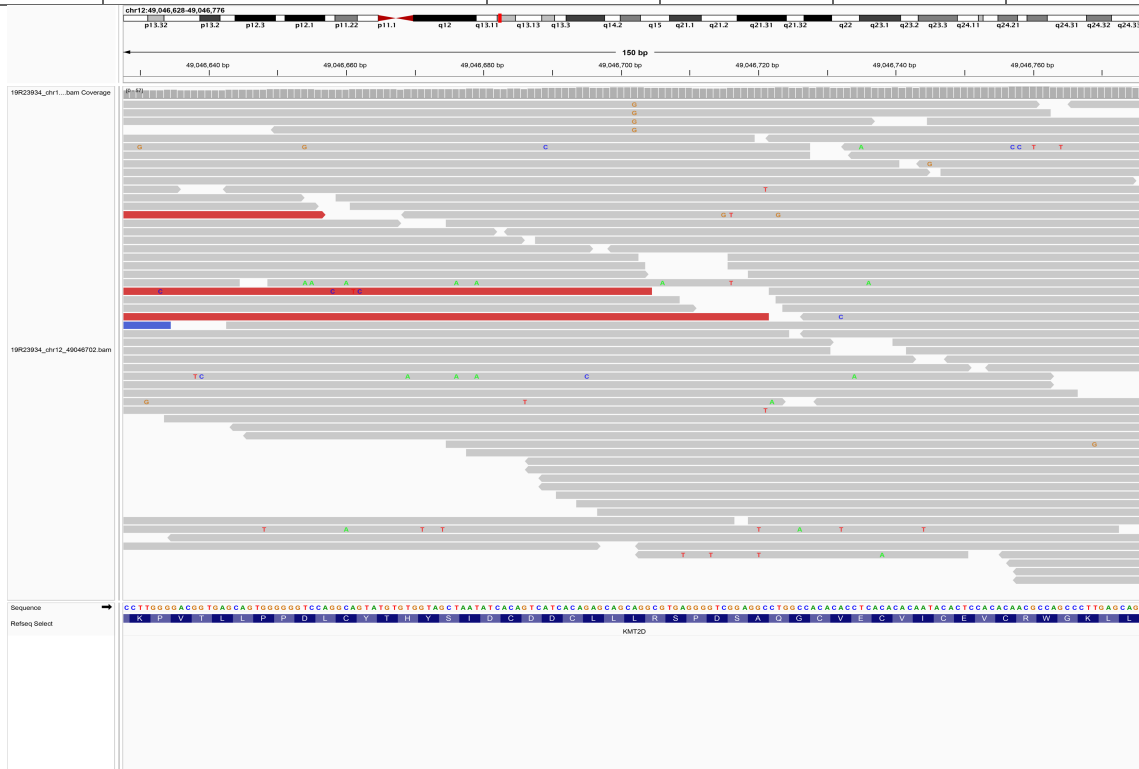

1.104. chr12\_49047984\_G/T

| SampleID | Variants (GRCh38)  | Ref_depth | Alt_depth | Gene  | Consequence      |
|----------|--------------------|-----------|-----------|-------|------------------|
| 18R09527 | chr12_49047984_G/T | 45        | 4         | KMT2D | missense_variant |

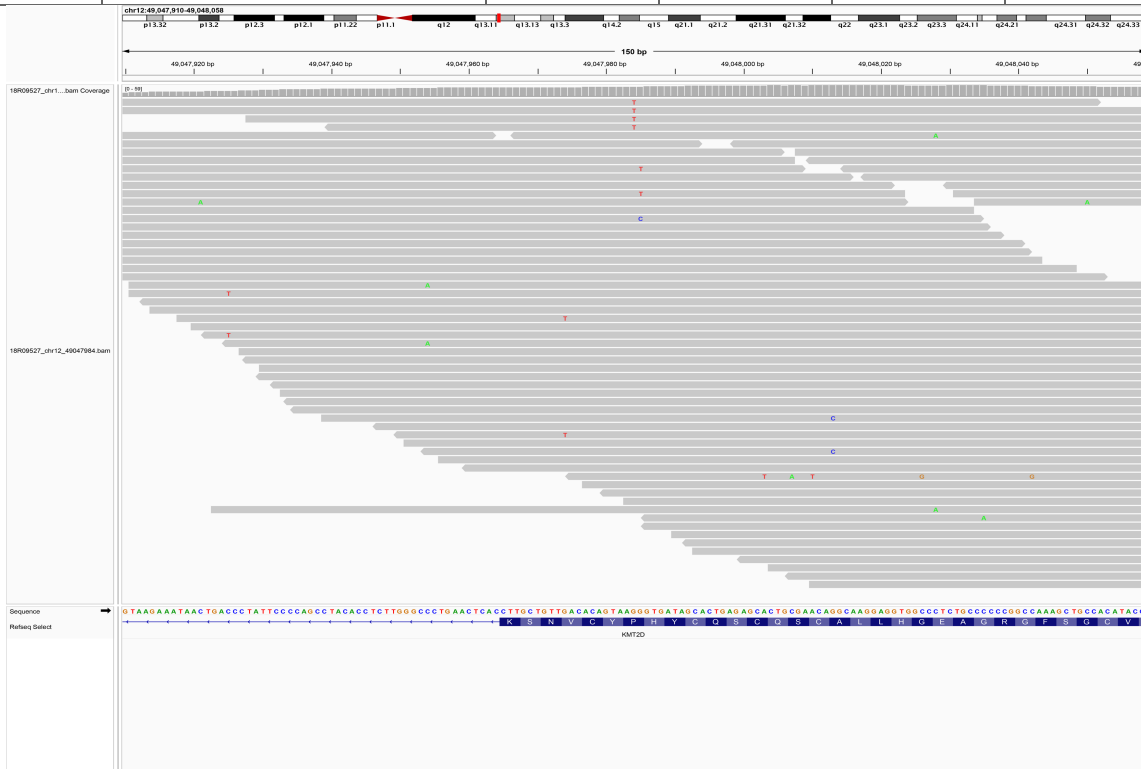

1.105. chr12\_49048754\_T/C

| SampleID | Variants (GRCh38)  | Ref_depth | Alt_depth | Gene  | Consequence      |
|----------|--------------------|-----------|-----------|-------|------------------|
| 18R09255 | chr12_49048754_T/C | 32        | 3         | KMT2D | missense_variant |

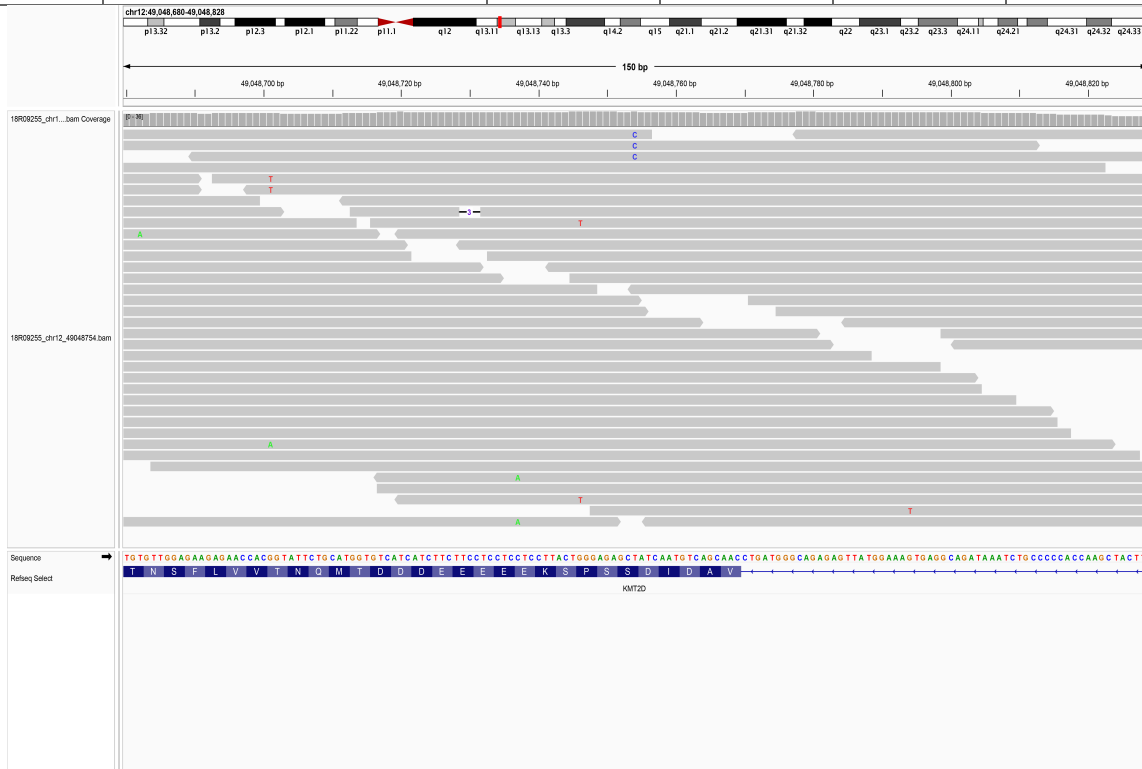

1.106. chr12\_49049119\_T/C

| SampleID | Variants (GRCh38)  | Ref_depth | Alt_depth | Gene  | Consequence      |
|----------|--------------------|-----------|-----------|-------|------------------|
| 18R08867 | chr12_49049119_T/C | 47        | 3         | KMT2D | missense_variant |

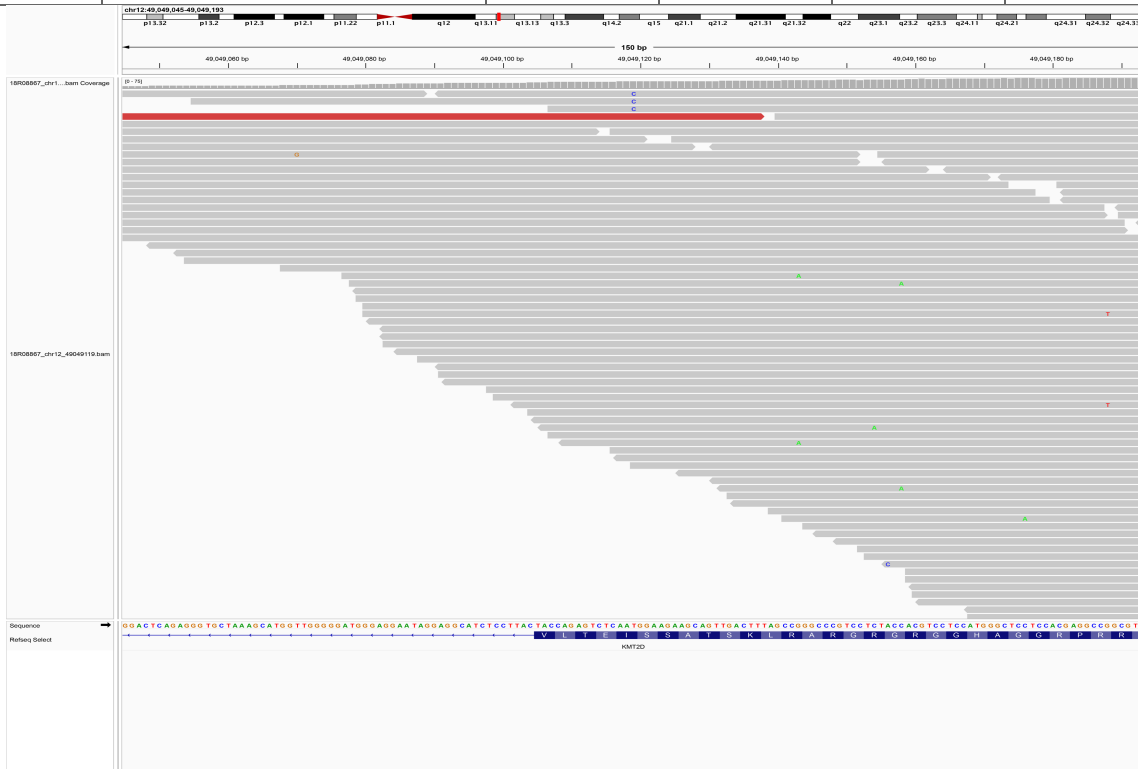

1.107. chr12\_49049185\_G/A

| SampleID | Variants (GRCh38)  | Ref_depth | Alt_depth | Gene  | Consequence      |
|----------|--------------------|-----------|-----------|-------|------------------|
| 18R12884 | chr12_49049185_G/A | 36        | 3         | KMT2D | missense_variant |

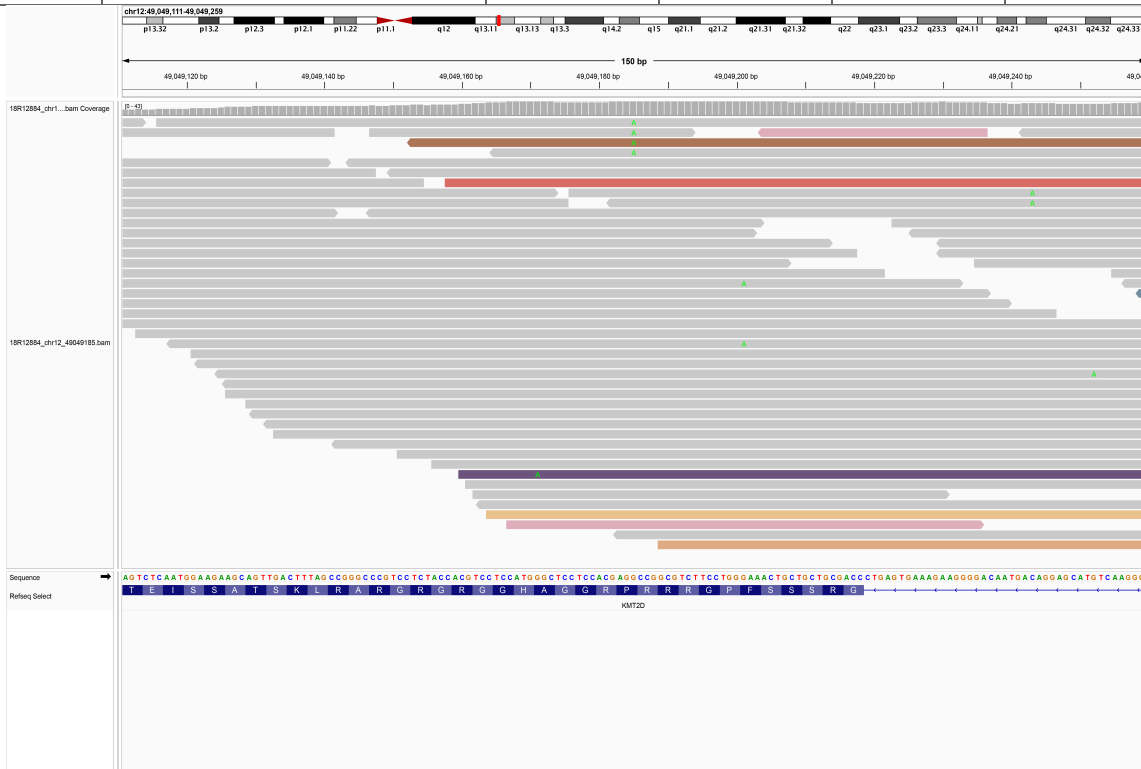

1.108. chr12\_49049190\_C/A

| SampleID | Variants (GRCh38)  | Ref_depth | Alt_depth | Gene  | Consequence      |
|----------|--------------------|-----------|-----------|-------|------------------|
| 18R08796 | chr12_49049190_C/A | 50        | 3         | KMT2D | missense_variant |

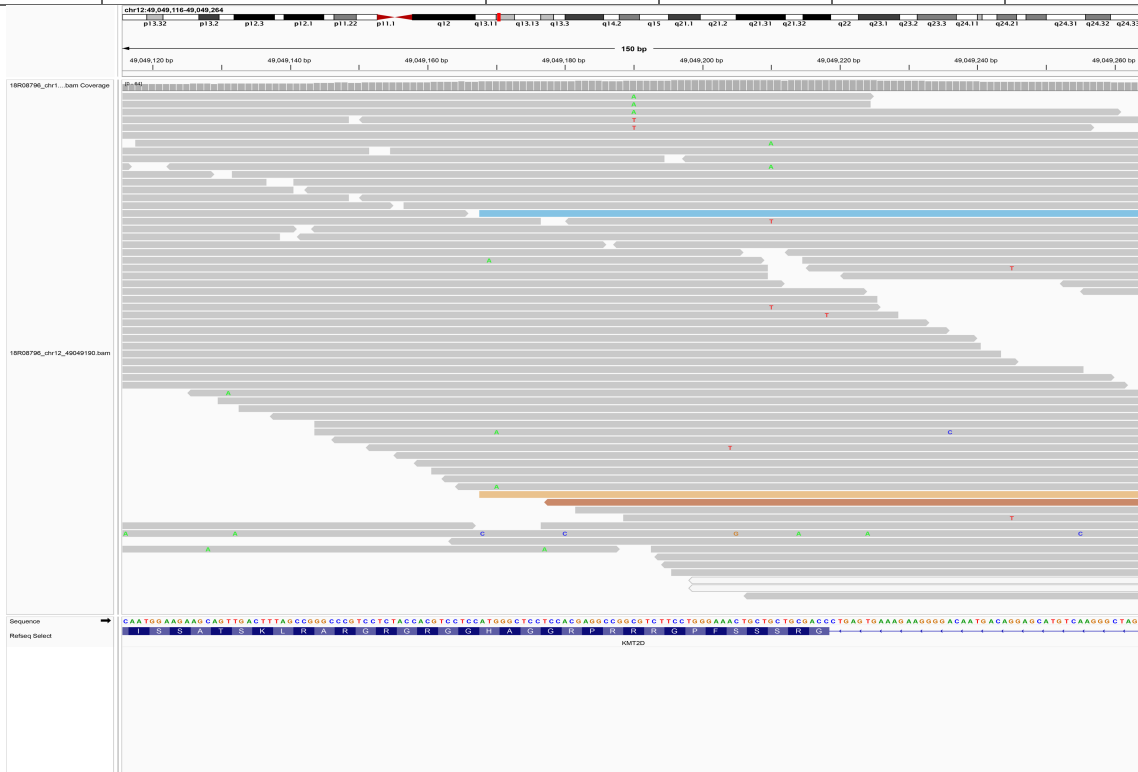

1.109. chr12\_49049762\_C/T

| SampleID  | Variants (GRCh38)  | Ref_depth | Alt_depth | Gene         | Consequence      |
|-----------|--------------------|-----------|-----------|--------------|------------------|
| 100603676 | chr12_49049762_C/T | 43        | 4         | <i>KMT2D</i> | missense_variant |

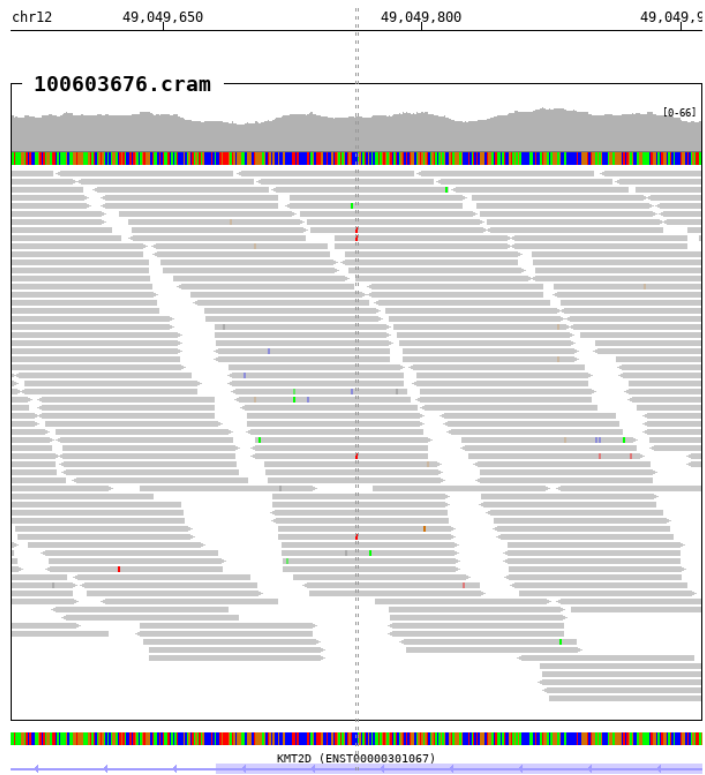

1.110. chr12\_49049941\_G/A

| SampleID | Variants (GRCh38)  | Ref_depth | Alt_depth | Gene  | Consequence      |
|----------|--------------------|-----------|-----------|-------|------------------|
| 18R09150 | chr12_49049941_G/A | 55        | 4         | KMT2D | missense_variant |

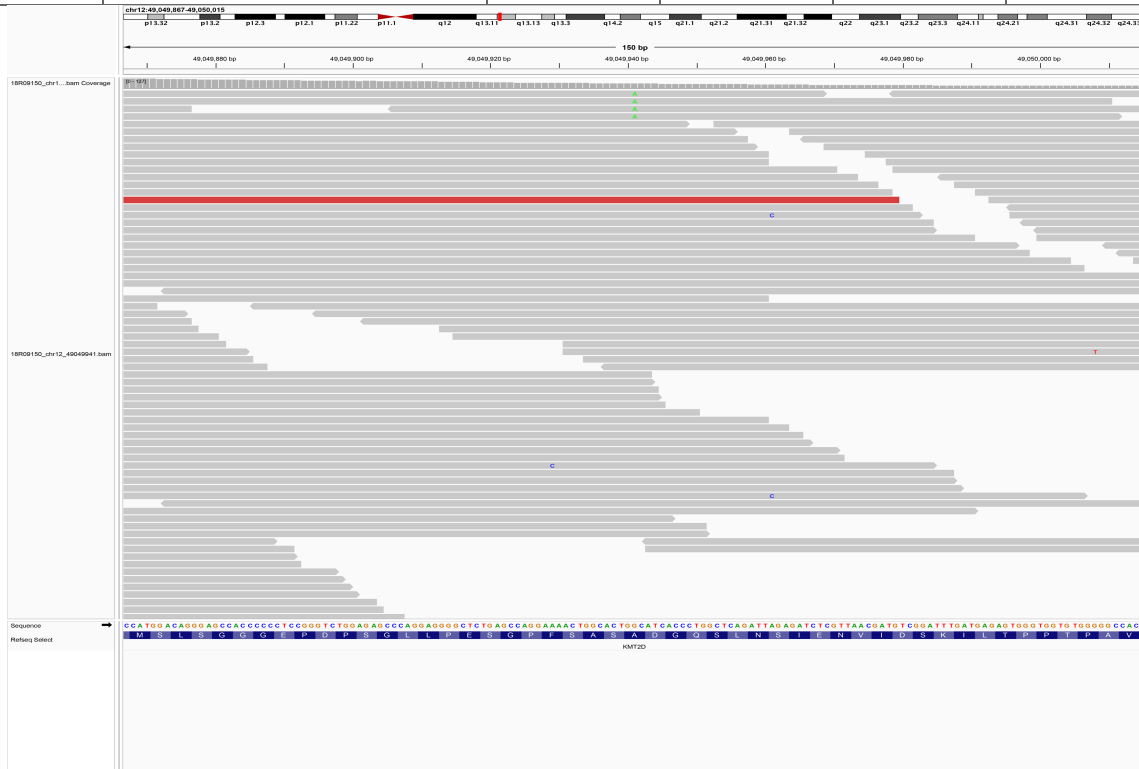

1.111. chr12\_49050016\_G/A

| SampleID | Variants (GRCh38)  | Ref_depth | Alt_depth | Gene         | Consequence      |
|----------|--------------------|-----------|-----------|--------------|------------------|
| 18R09224 | chr12_49050016_G/A | 95        | 4         | <i>KMT2D</i> | missense_variant |

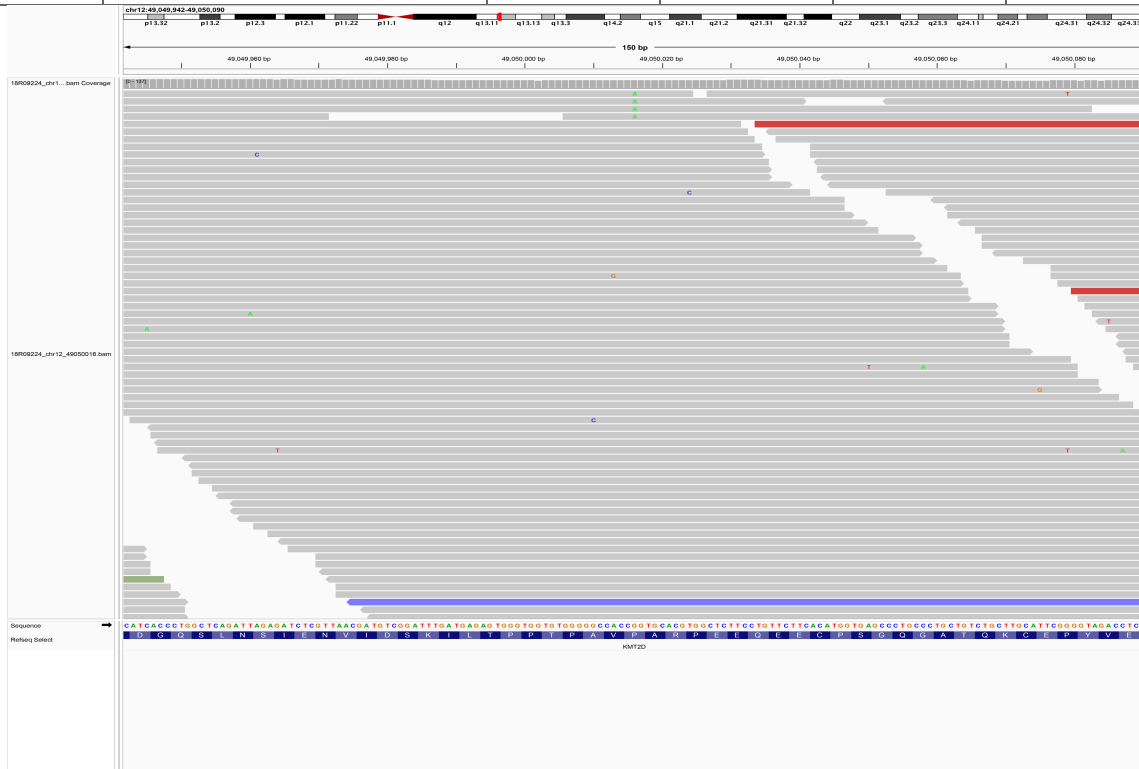

1.112. chr12\_49050173\_G/T

| SampleID | Variants (GRCh38)  | Ref_depth | Alt_depth | Gene  | Consequence      |
|----------|--------------------|-----------|-----------|-------|------------------|
| 18R15086 | chr12_49050173_G/T | 50        | 4         | KMT2D | missense_variant |

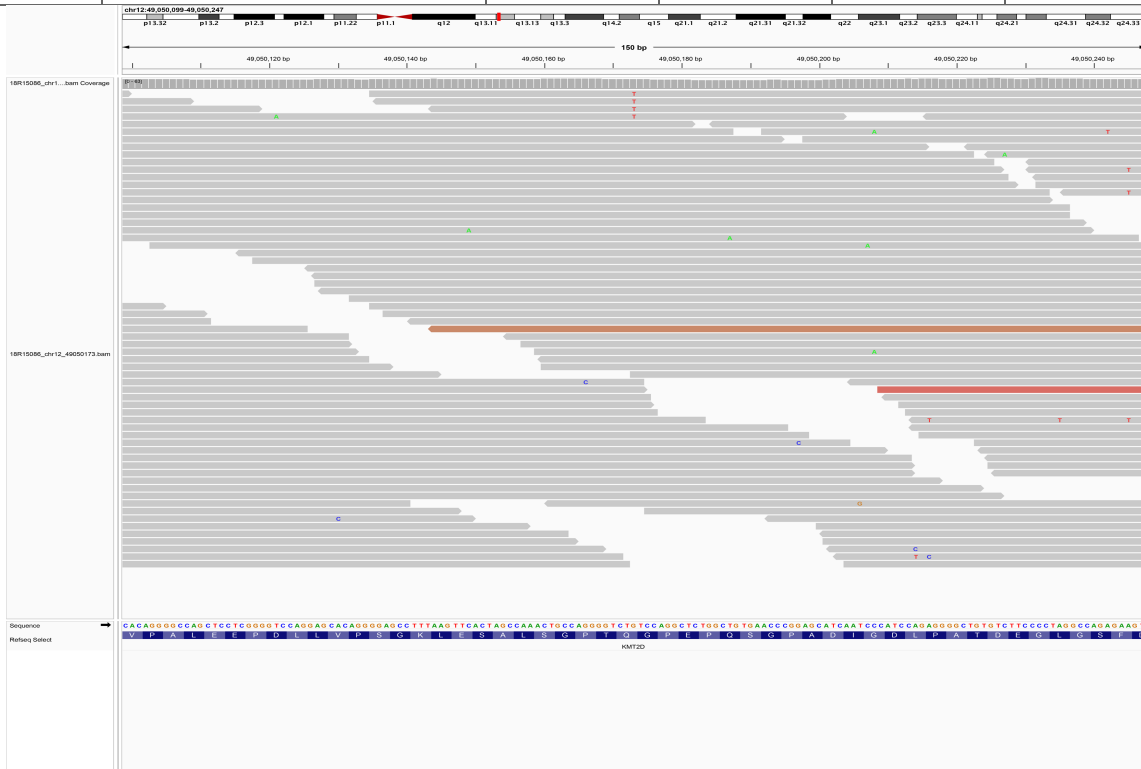

1.113. chr12\_49050186\_C/A

| SampleID | Variants (GRCh38)  | Ref_depth | Alt_depth | Gene  | Consequence      |
|----------|--------------------|-----------|-----------|-------|------------------|
| 18R15109 | chr12_49050186_C/A | 110       | 5         | KMT2D | missense_variant |

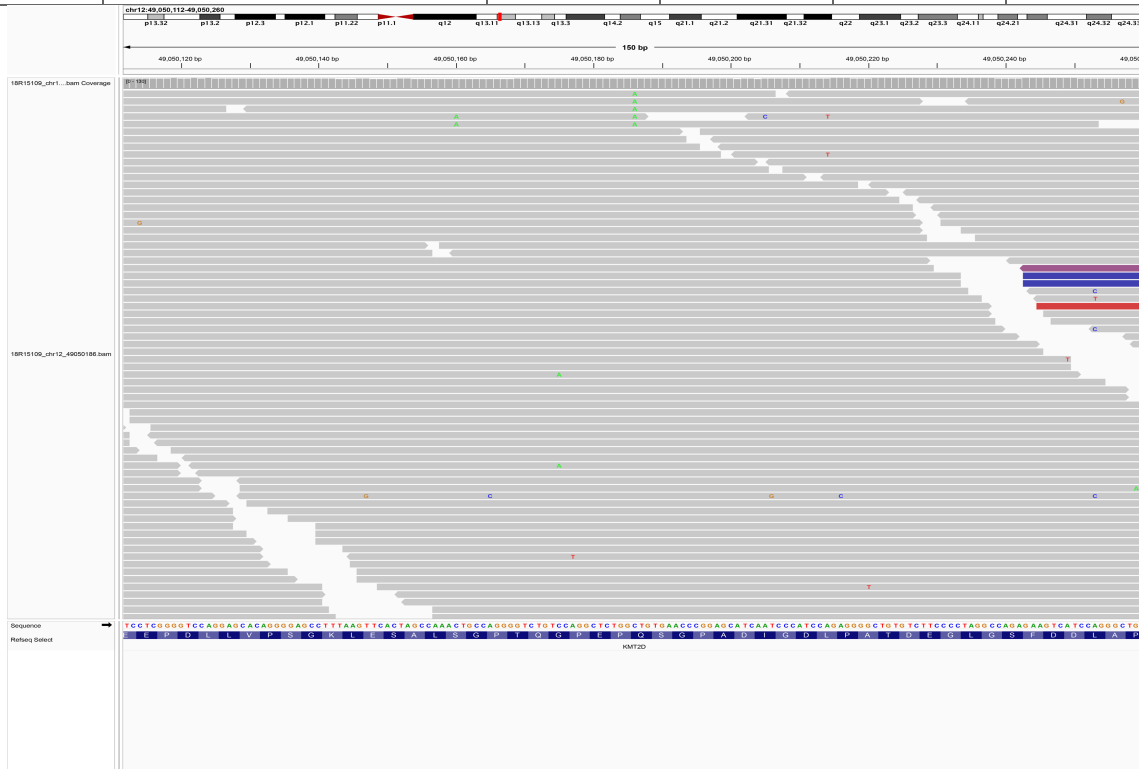

1.114. chr12\_49050218\_G/A

| SampleID | Variants (GRCh38)  | Ref_depth | Alt_depth | Gene  | Consequence      |
|----------|--------------------|-----------|-----------|-------|------------------|
| 18R12884 | chr12_49050218_G/A | 51        | 4         | KMT2D | missense_variant |

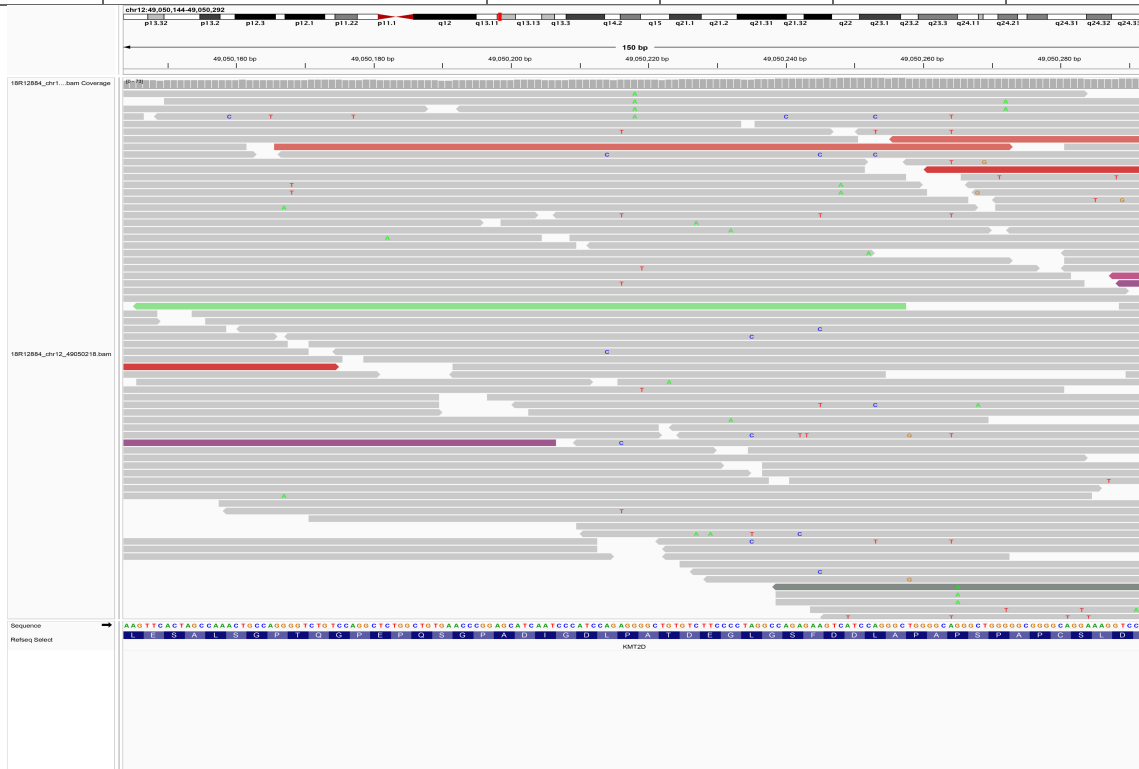

1.115. chr12\_49050227\_C/A

| SampleID    | Variants (GRCh38)  | Ref_depth | Alt_depth | Gene  | Consequence      |
|-------------|--------------------|-----------|-----------|-------|------------------|
| AAGC033056C | chr12_49050227_C/A | 73        | 4         | KMT2D | missense_variant |

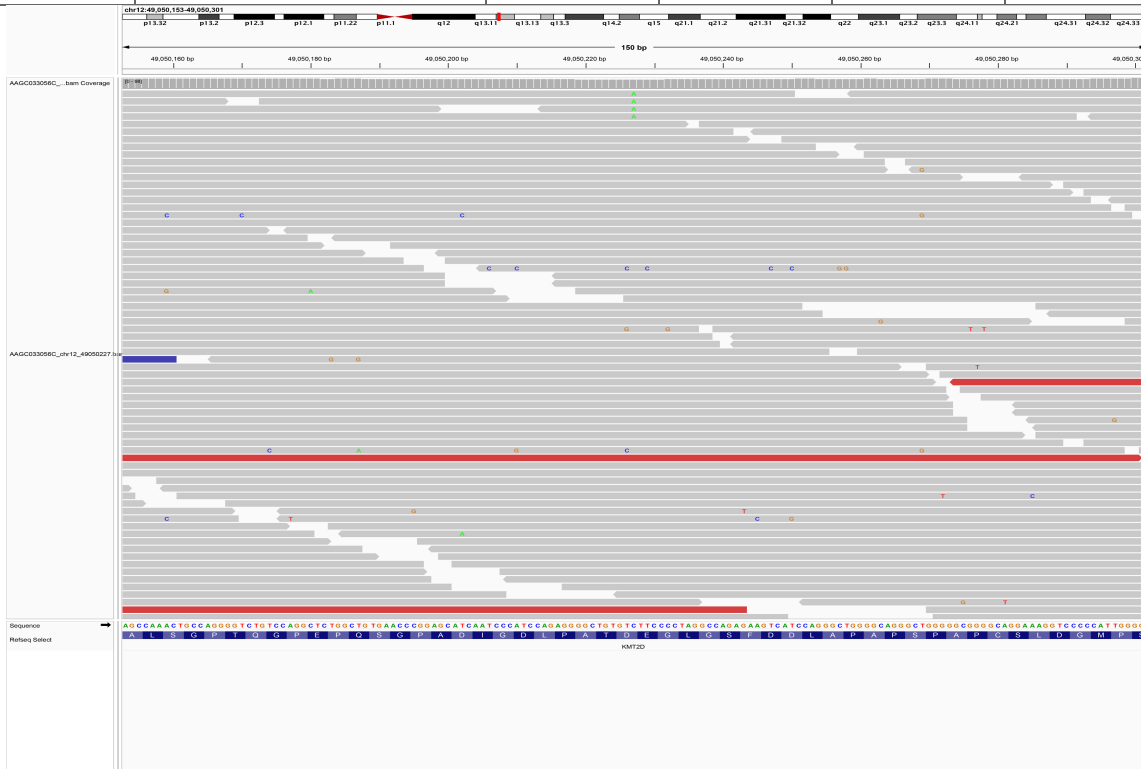

1.116. chr12\_49050481\_T/C

| SampleID | Variants (GRCh38)  | Ref_depth | Alt_depth | Gene  | Consequence      |
|----------|--------------------|-----------|-----------|-------|------------------|
| 19R23539 | chr12_49050481_T/C | 36        | 4         | KMT2D | missense_variant |

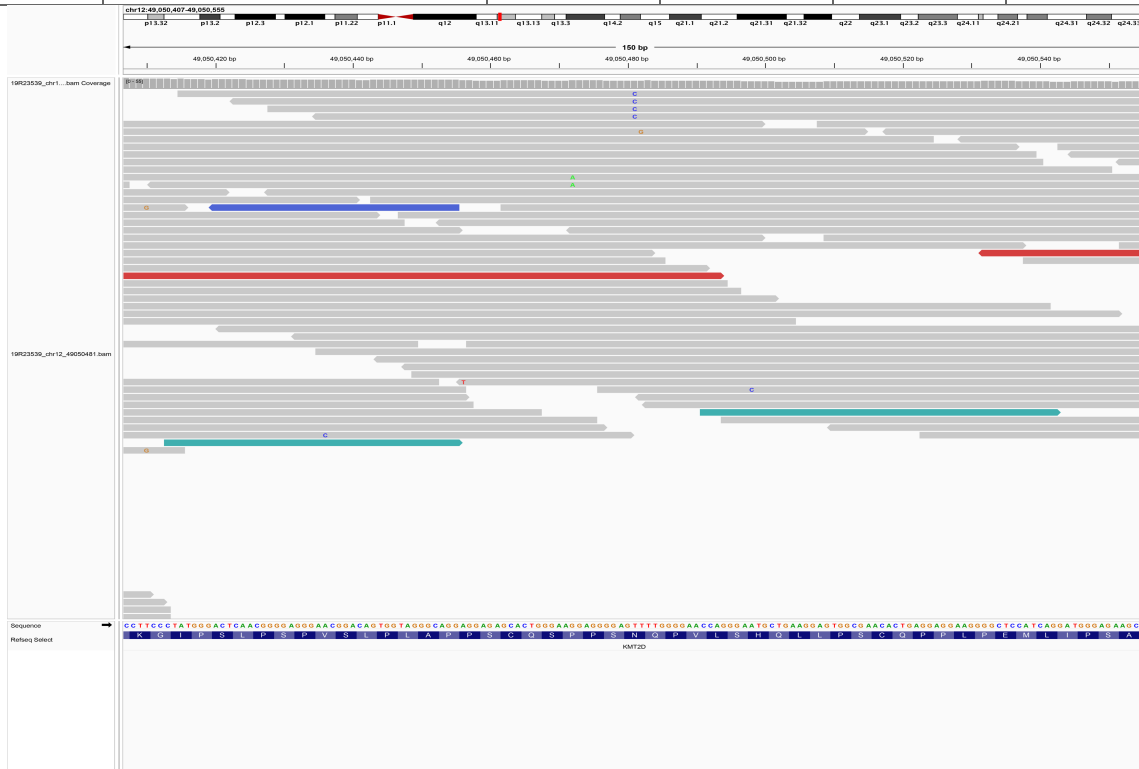

1.117. chr12\_49050673\_G/T

| SampleID | Variants (GRCh38)  | Ref_depth | Alt_depth | Gene  | Consequence      |
|----------|--------------------|-----------|-----------|-------|------------------|
| 18R13005 | chr12_49050673_G/T | 20        | 4         | KMT2D | missense_variant |

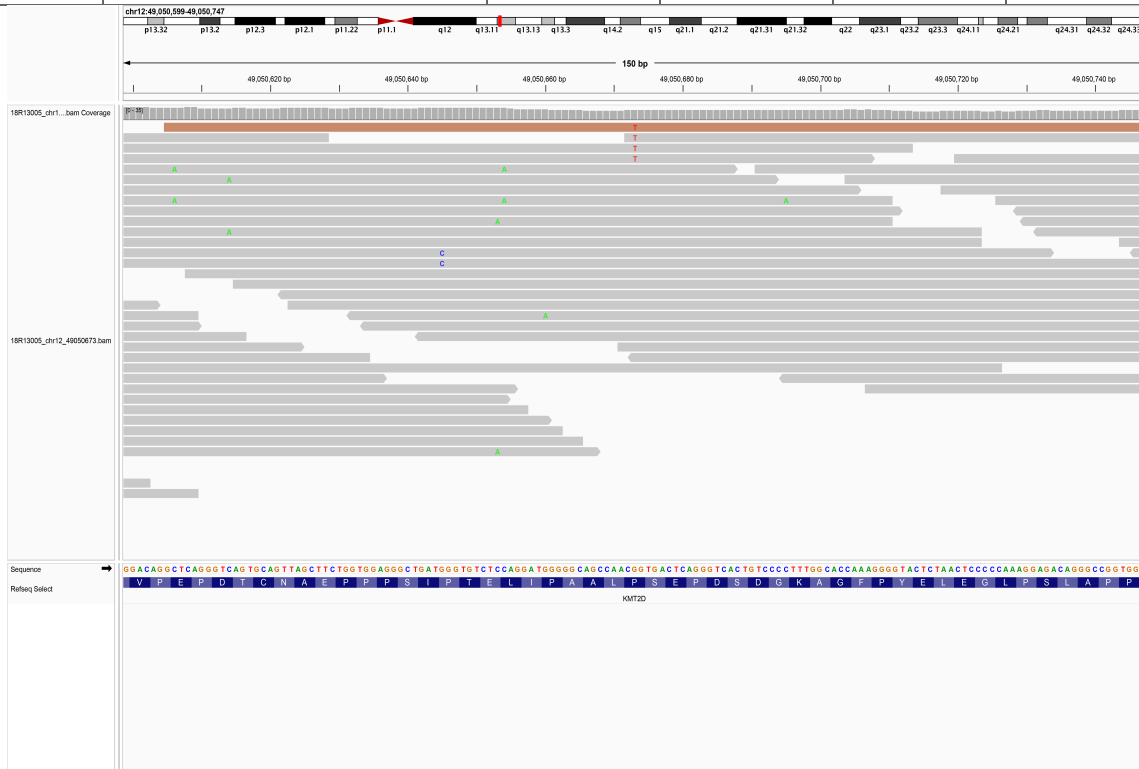

1.118. chr12\_4905701\_CA/TG

| SampleID | Variants (GRCh38)   | Ref_depth | Alt_depth | Gene         | Consequence      |
|----------|---------------------|-----------|-----------|--------------|------------------|
| 19R23502 | chr12_4905701_CA/TG | 52        | 4         | <i>KMT2D</i> | missense_variant |
| 19R23583 | chr12_4905701_CA/TG | 63        | 4         | <i>KMT2D</i> | missense_variant |
| 483_BLD  | chr12_4905701_CA/TG | 66        | 3         | <i>KMT2D</i> | missense_variant |

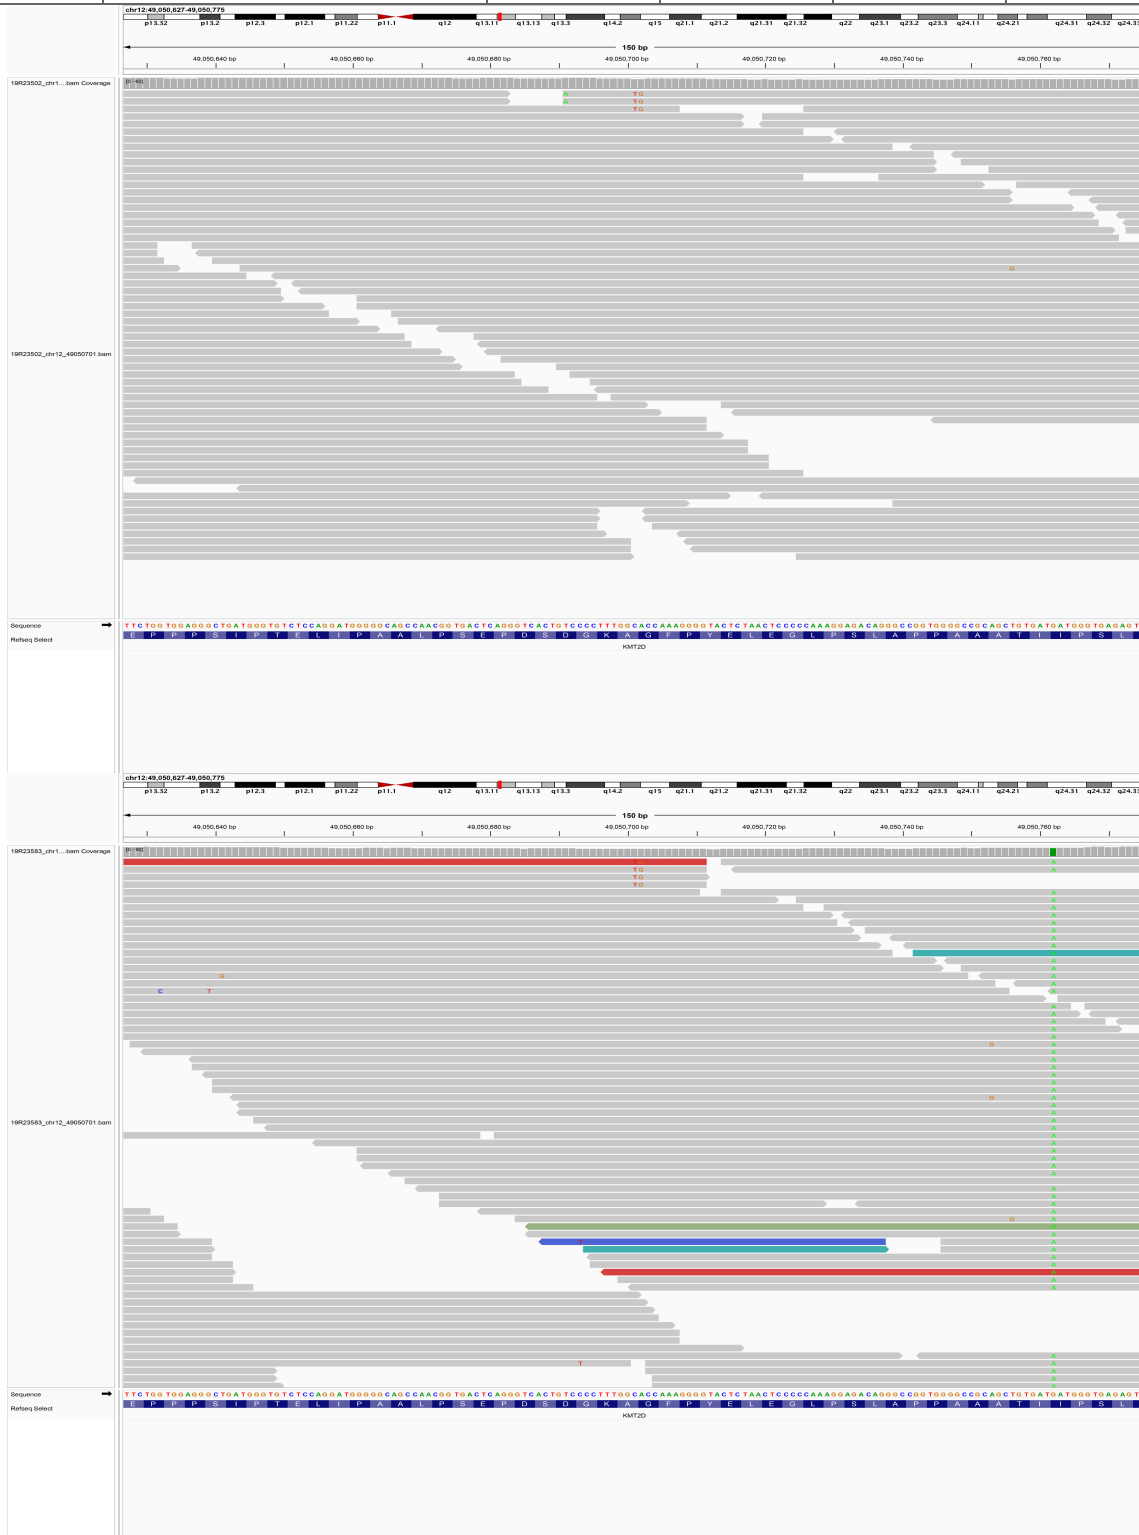

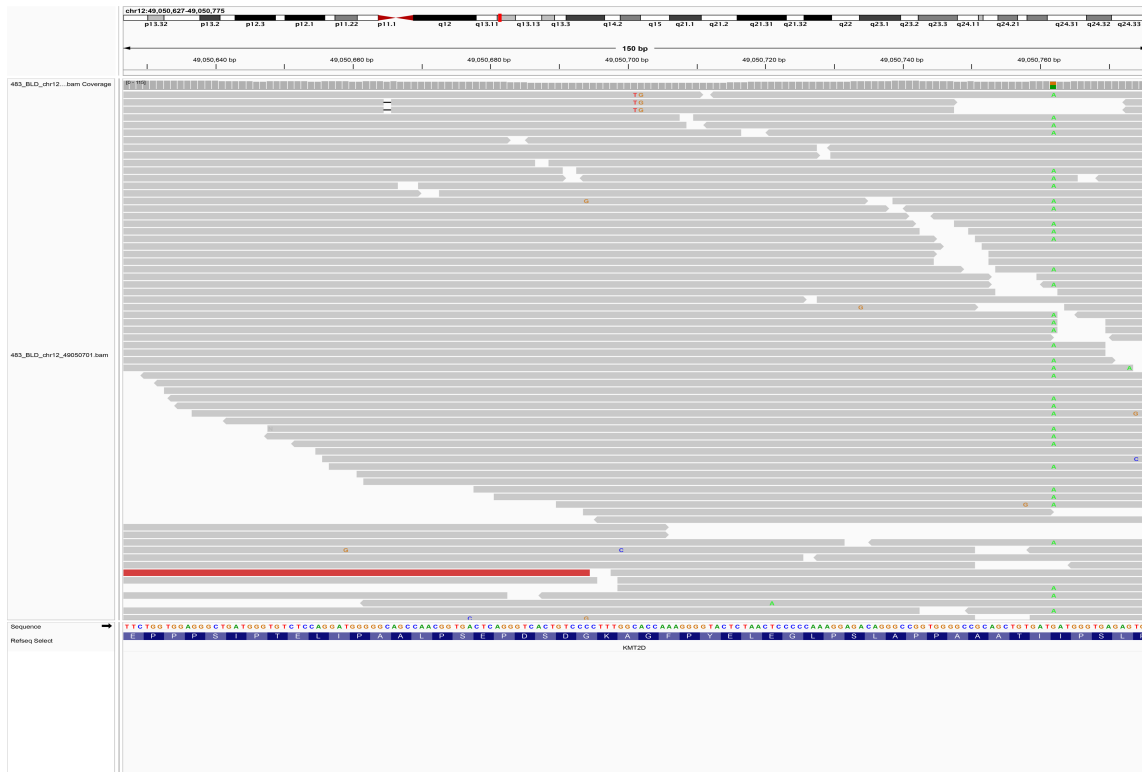

1.119. chr12\_49051115\_C/A

| SampleID | Variants (GRCh38)  | Ref_depth | Alt_depth | Gene  | Consequence      |
|----------|--------------------|-----------|-----------|-------|------------------|
| 18R12960 | chr12_49051115_C/A | 27        | 4         | KMT2D | missense_variant |

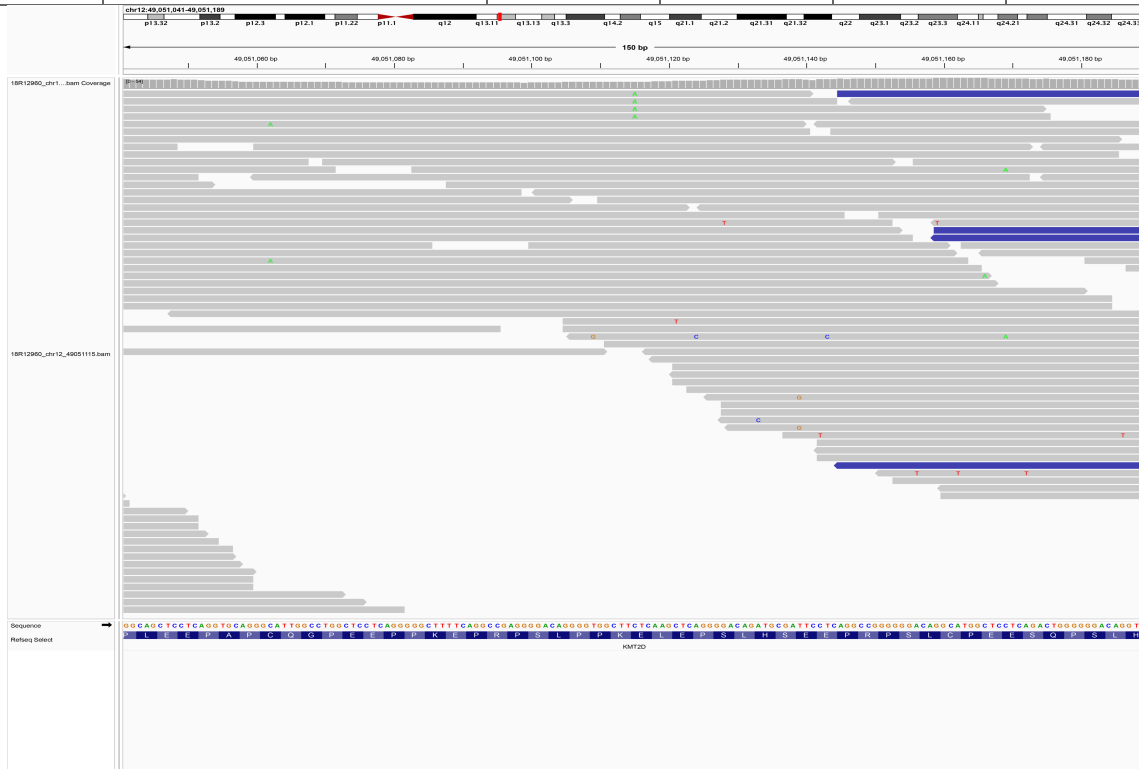

1.120. chr12\_49051192\_AT/GC

| SampleID    | Variants (GRCh38)    | Ref_depth | Alt_depth | Gene  | Consequence      |
|-------------|----------------------|-----------|-----------|-------|------------------|
| AAGC022159D | chr12_49051192_AT/GC | 19        | 3         | KMT2D | missense_variant |

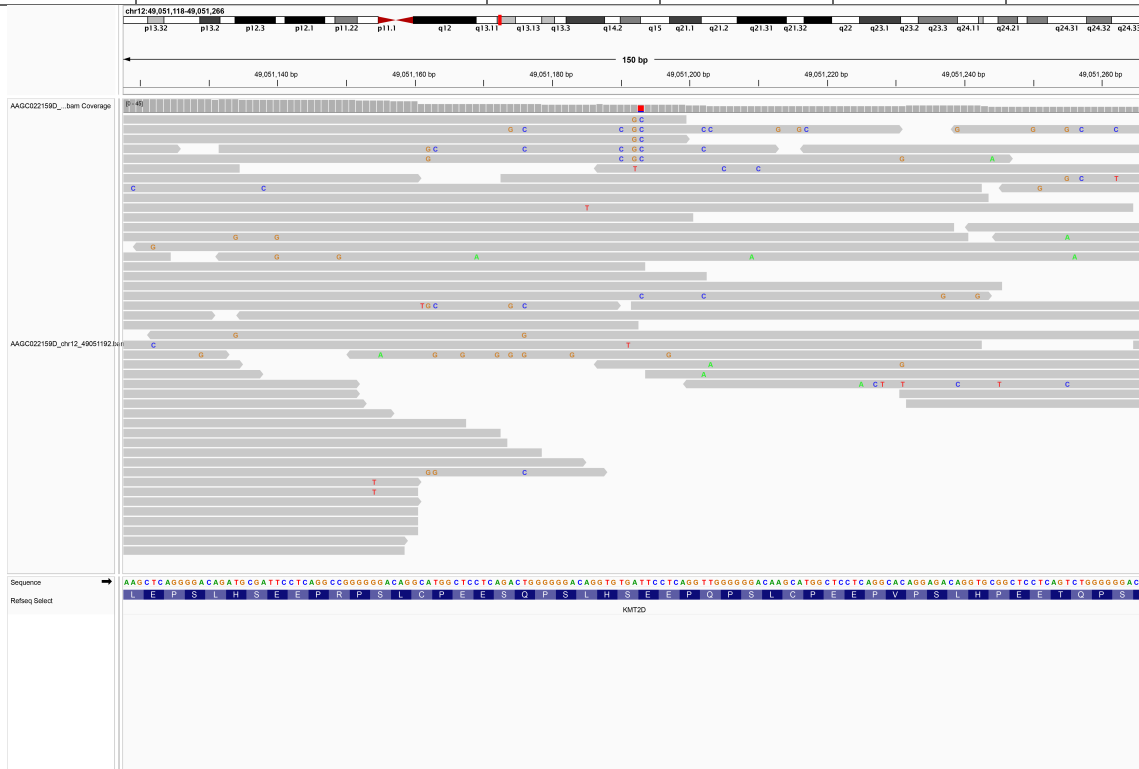

1.121. chr12\_49051527\_G/T

| SampleID | Variants (GRCh38)  | Ref_depth | Alt_depth | Gene  | Consequence      |
|----------|--------------------|-----------|-----------|-------|------------------|
| 18R10740 | chr12_49051527_G/T | 74        | 4         | KMT2D | missense_variant |

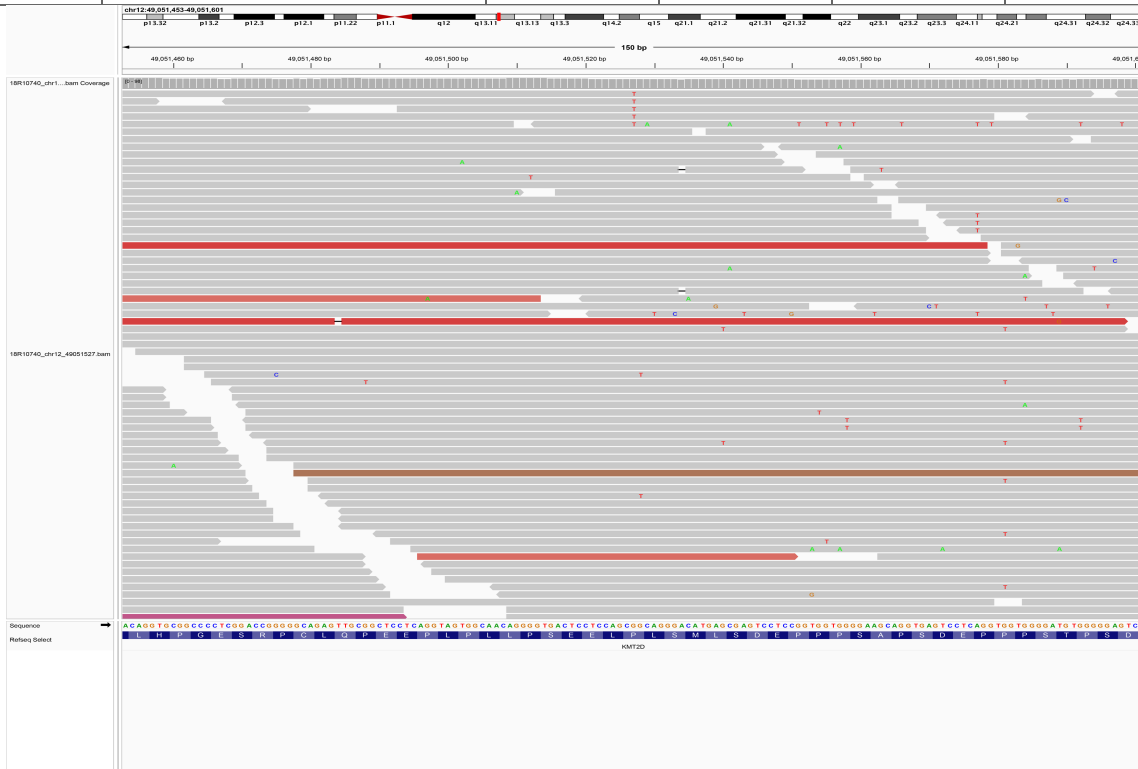



1.123. chr12\_49051783\_G/A

| SampleID | Variants (GRCh38)  | Ref_depth | Alt_depth | Gene  | Consequence      |
|----------|--------------------|-----------|-----------|-------|------------------|
| 19R23602 | chr12_49051783_G/A | 148       | 5         | KMT2D | missense_variant |

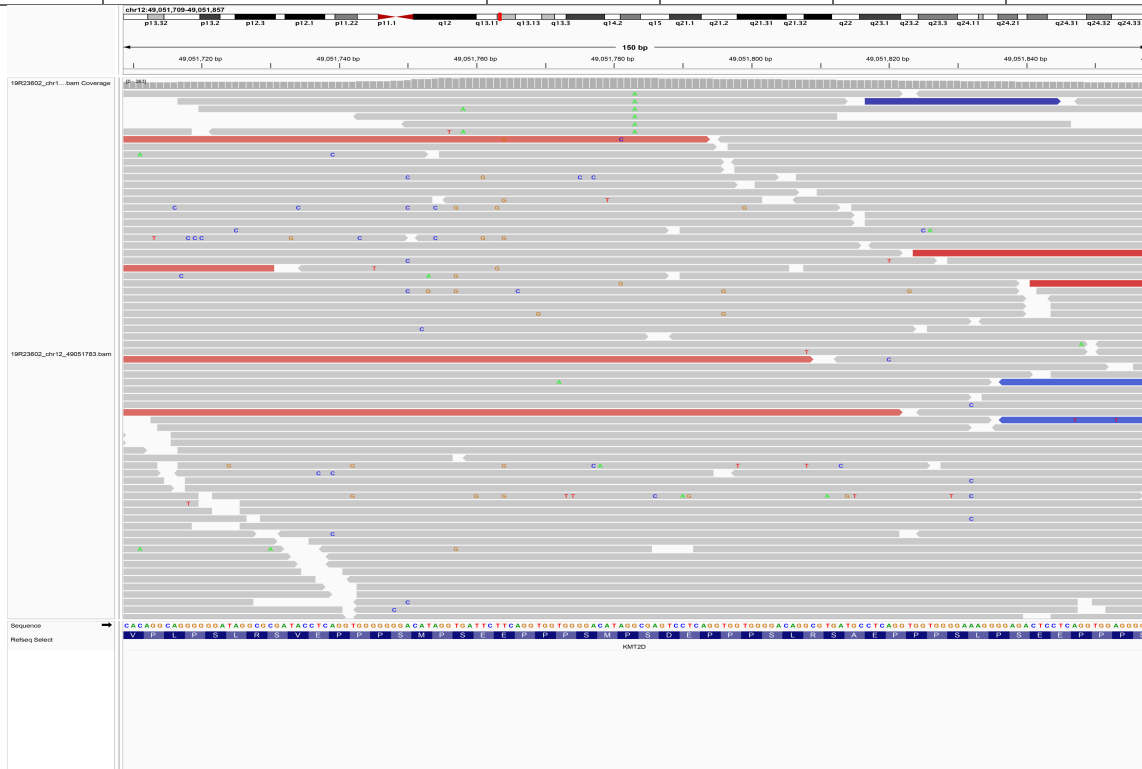



1.125. chr12\_49051828\_G/T

| SampleID | Variants (GRCh38)  | Ref_depth | Alt_depth | Gene  | Consequence      |
|----------|--------------------|-----------|-----------|-------|------------------|
| 19R23979 | chr12_49051828_G/T | 95        | 5         | KMT2D | missense_variant |

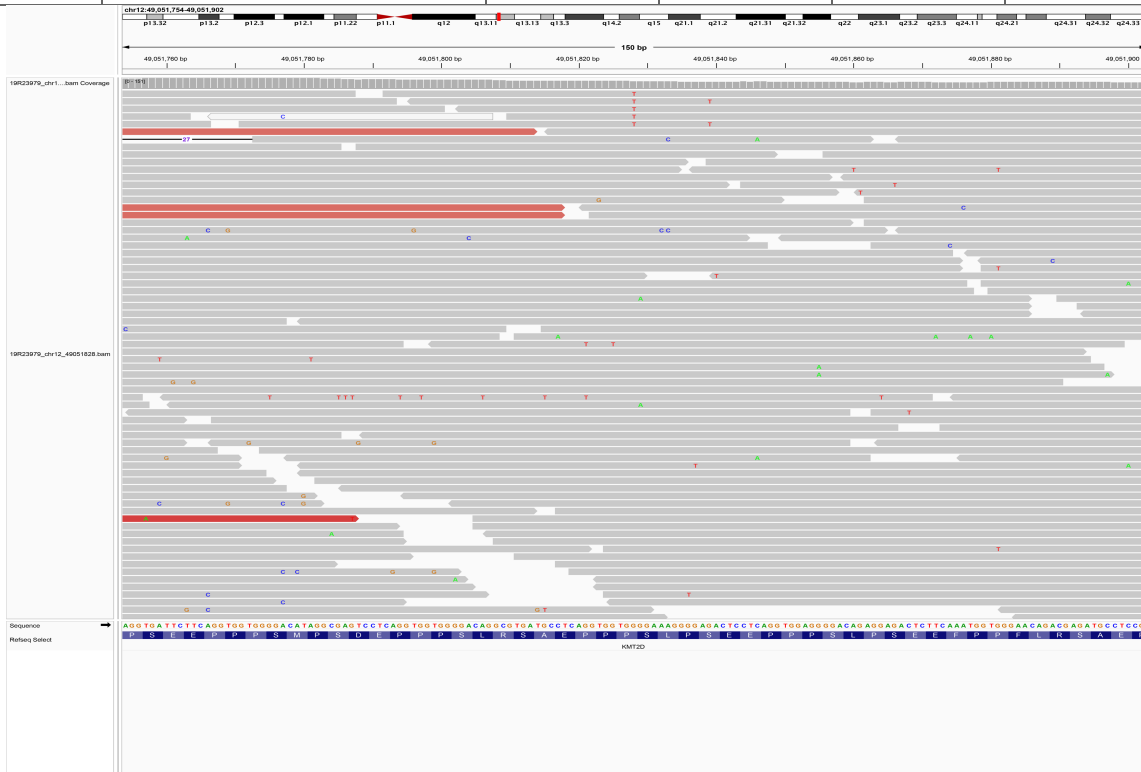

1.126. chr12\_49051977\_G/A

| SampleID      | Variants (GRCh38)  | Ref_depth | Alt_depth | Gene         | Consequence      |
|---------------|--------------------|-----------|-----------|--------------|------------------|
| AAGC25060361D | chr12_49051977_G/A | 133       | 5         | <i>KMT2D</i> | missense_variant |

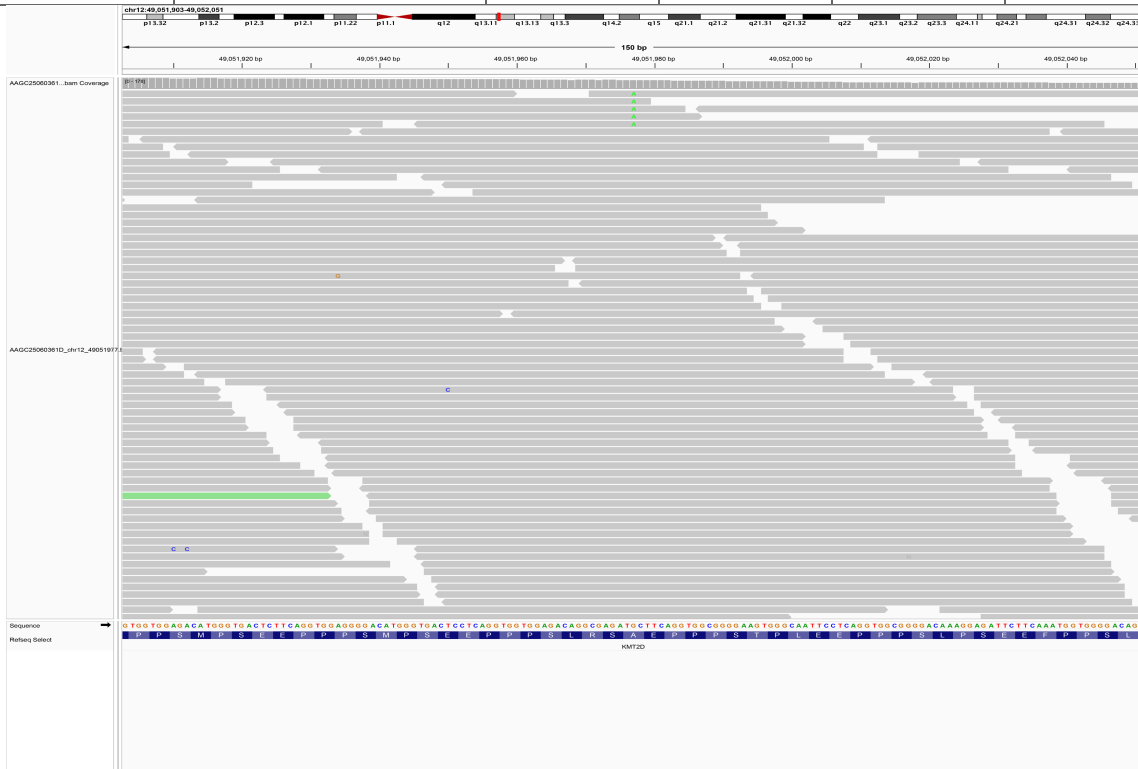

1.127. chr12\_49052084\_C/G

| SampleID | Variants (GRCh38)  | Ref_depth | Alt_depth | Gene         | Consequence      |
|----------|--------------------|-----------|-----------|--------------|------------------|
| 10012517 | chr12_49052084_C/G | 16        | 5         | <i>KMT2D</i> | missense_variant |
| 10072294 | chr12_49052084_C/G | 21        | 5         | <i>KMT2D</i> | missense_variant |
| 10302454 | chr12_49052084_C/G | 19        | 6         | <i>KMT2D</i> | missense_variant |
| 11050719 | chr12_49052084_C/G | 23        | 6         | <i>KMT2D</i> | missense_variant |
| 11311022 | chr12_49052084_C/G | 19        | 4         | <i>KMT2D</i> | missense_variant |
| 11311157 | chr12_49052084_C/G | 17        | 4         | <i>KMT2D</i> | missense_variant |

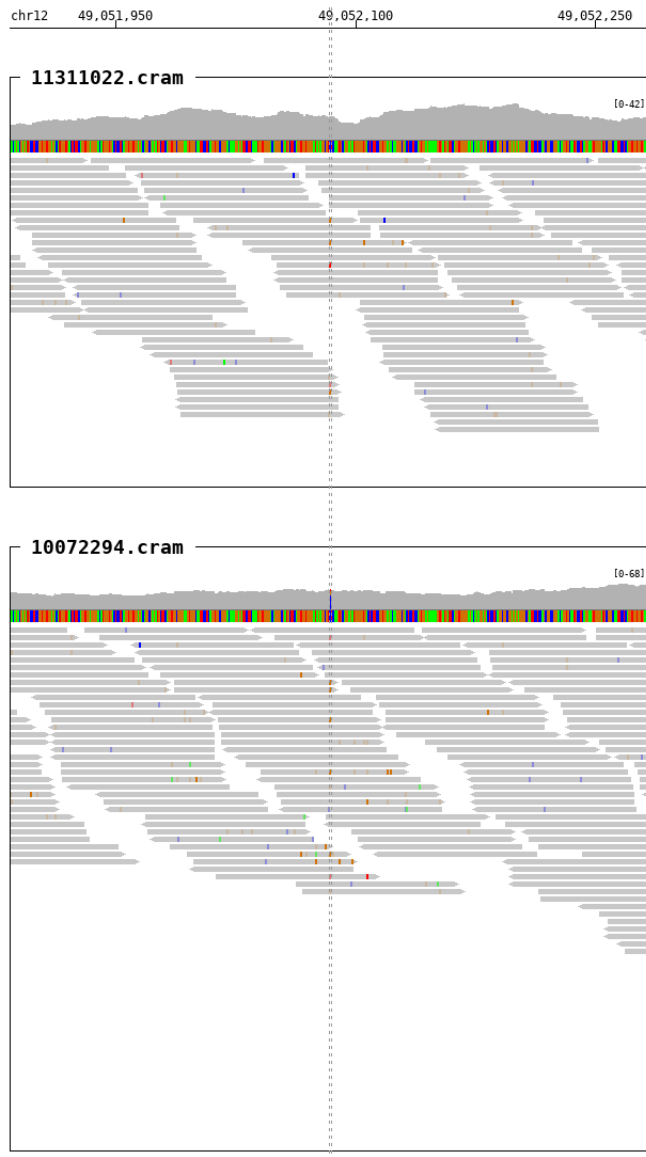

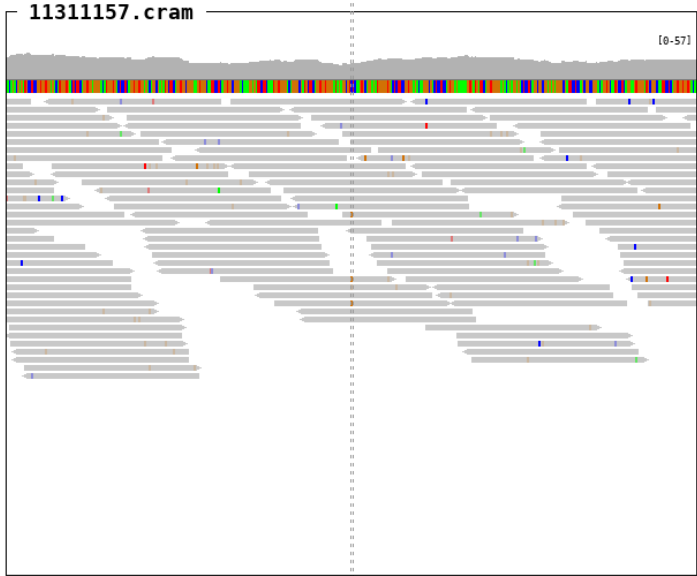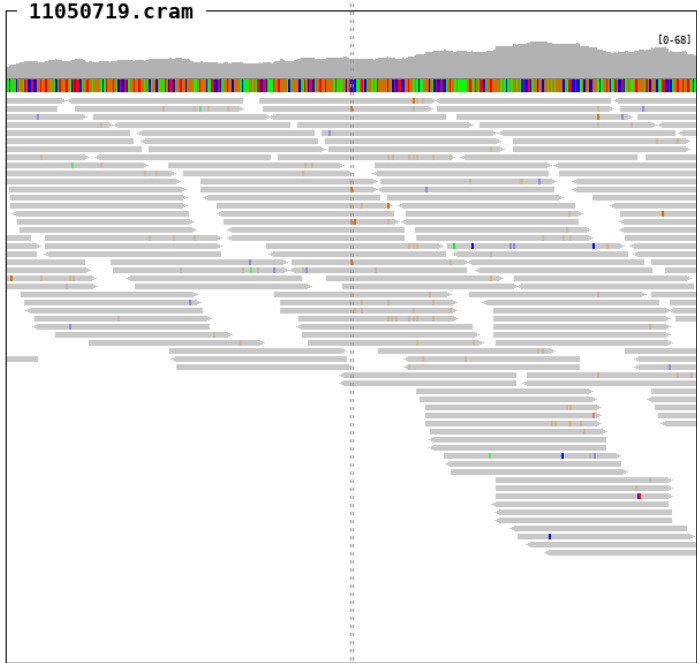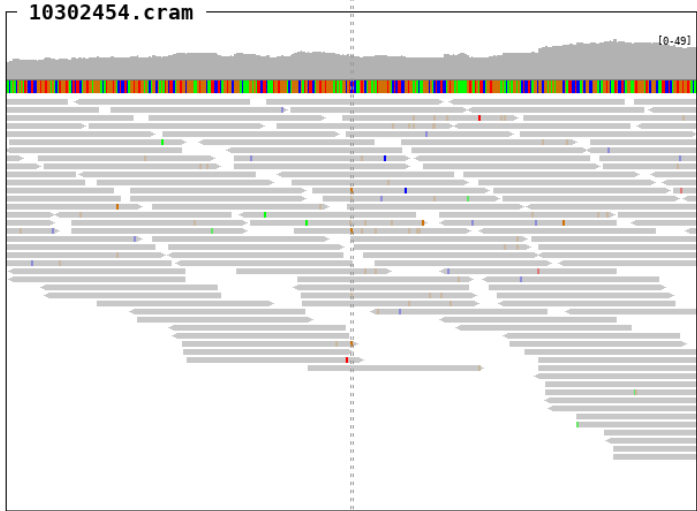

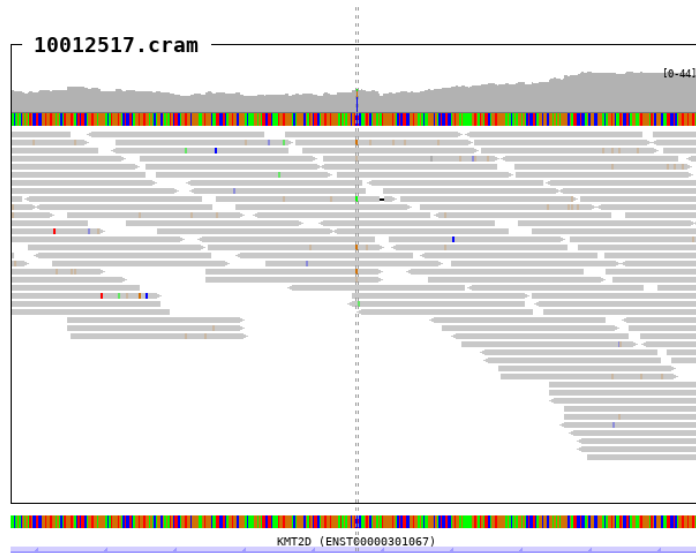

1.128. chr12\_49052372\_C/A

| SampleID | Variants (GRCh38)  | Ref_depth | Alt_depth | Gene  | Consequence      |
|----------|--------------------|-----------|-----------|-------|------------------|
| 18R09115 | chr12_49052372_C/A | 64        | 4         | KMT2D | missense_variant |

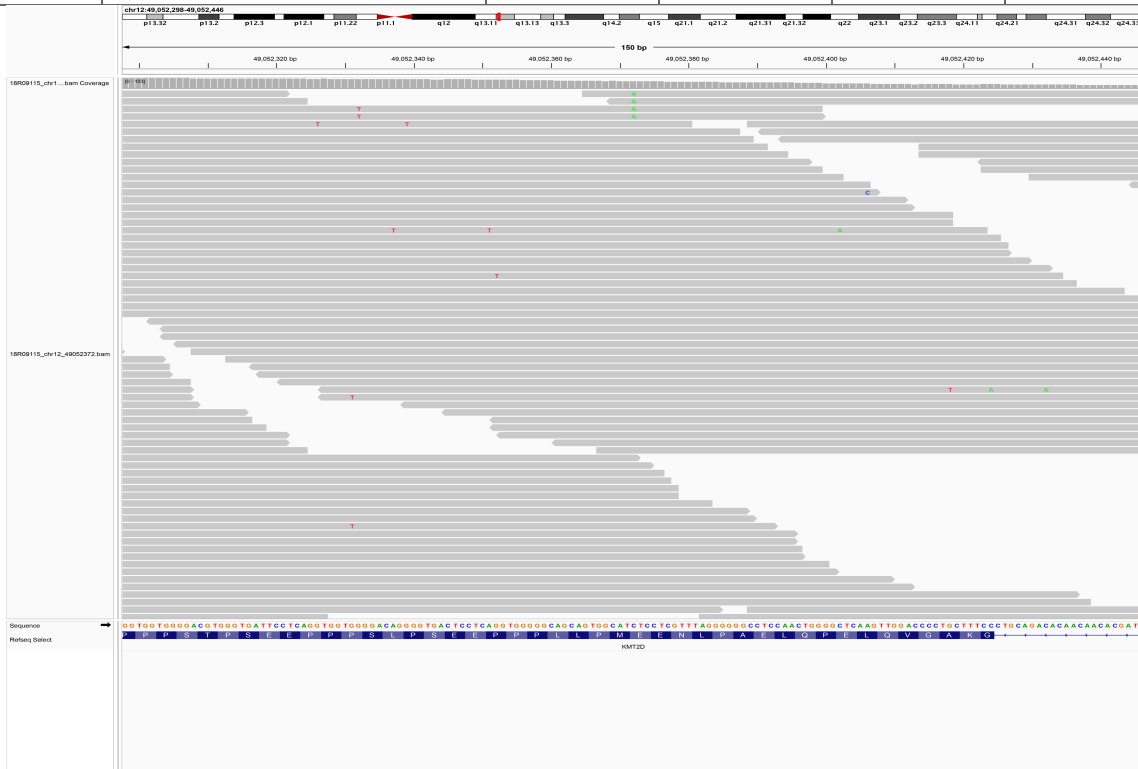

1.129. chr12\_49052654\_C/A

| SampleID | Variants (GRCh38)  | Ref_depth | Alt_depth | Gene         | Consequence      |
|----------|--------------------|-----------|-----------|--------------|------------------|
| 18R12959 | chr12_49052654_C/A | 56        | 4         | <i>KMT2D</i> | missense_variant |

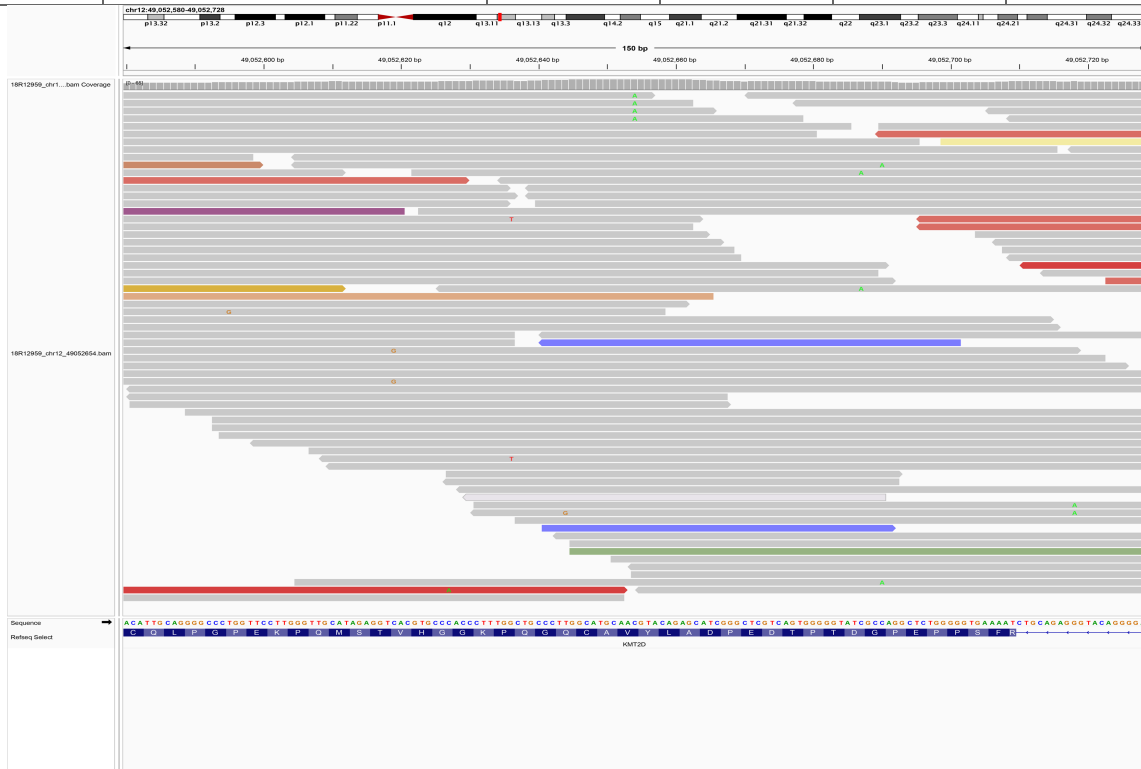

1.130. chr12\_49052683\_G/A

| SampleID | Variants (GRCh38)  | Ref_depth | Alt_depth | Gene  | Consequence      |
|----------|--------------------|-----------|-----------|-------|------------------|
| 18R09528 | chr12_49052683_G/A | 35        | 3         | KMT2D | missense_variant |

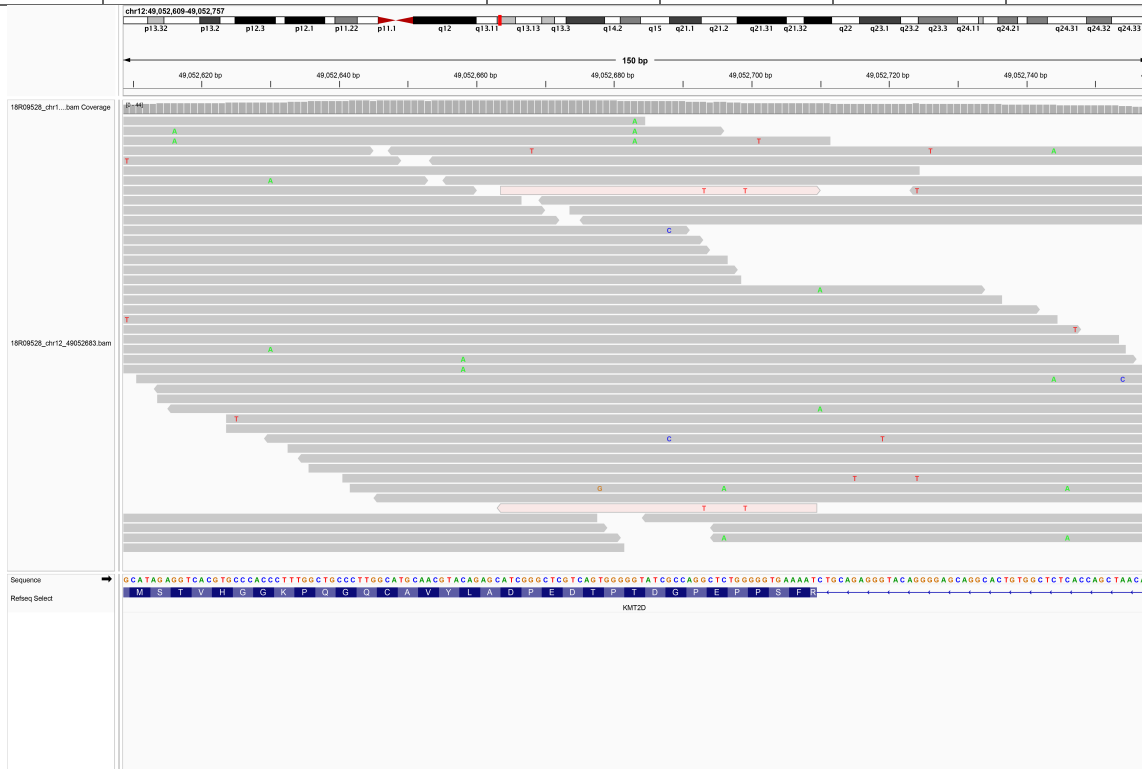



1.132. chr12\_49054047\_C/A

| SampleID | Variants (GRCh38)  | Ref_depth | Alt_depth | Gene  | Consequence      |
|----------|--------------------|-----------|-----------|-------|------------------|
| 18R09461 | chr12_49054047_C/A | 44        | 4         | KMT2D | missense_variant |

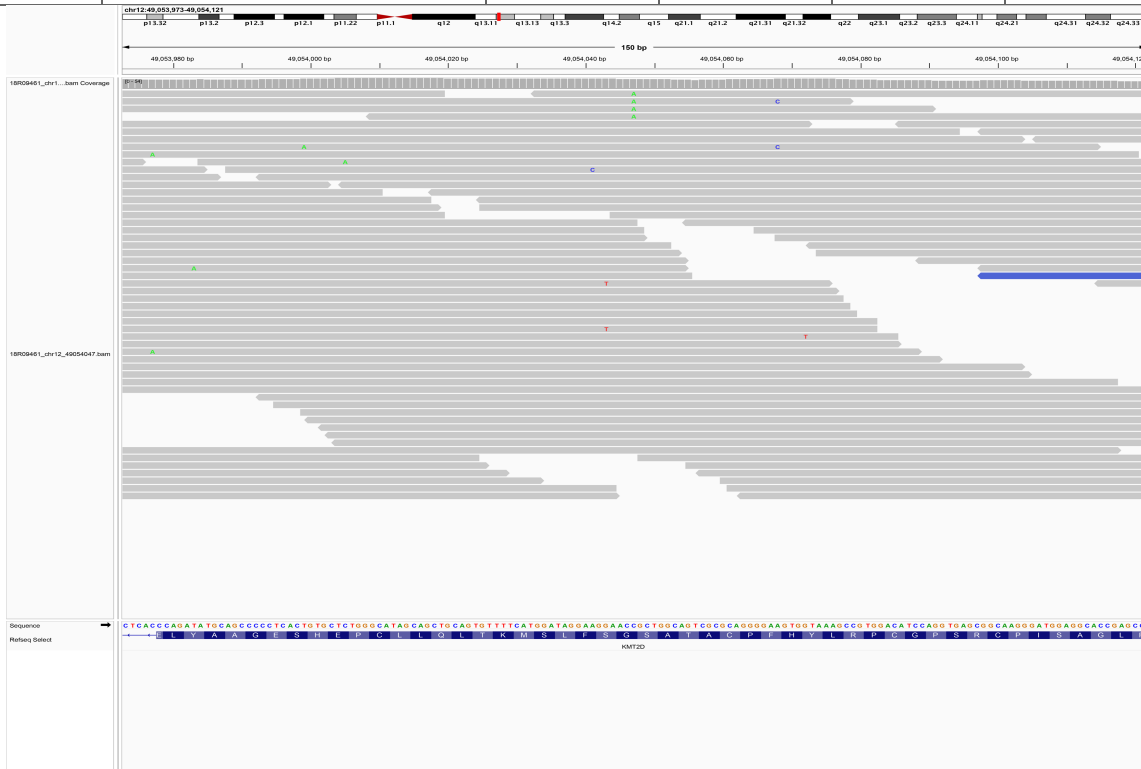

1.133. chr12\_49054563\_T/C

| SampleID | Variants (GRCh38)  | Ref_depth | Alt_depth | Gene         | Consequence      |
|----------|--------------------|-----------|-----------|--------------|------------------|
| 19R23416 | chr12_49054563_T/C | 50        | 4         | <i>KMT2D</i> | missense_variant |

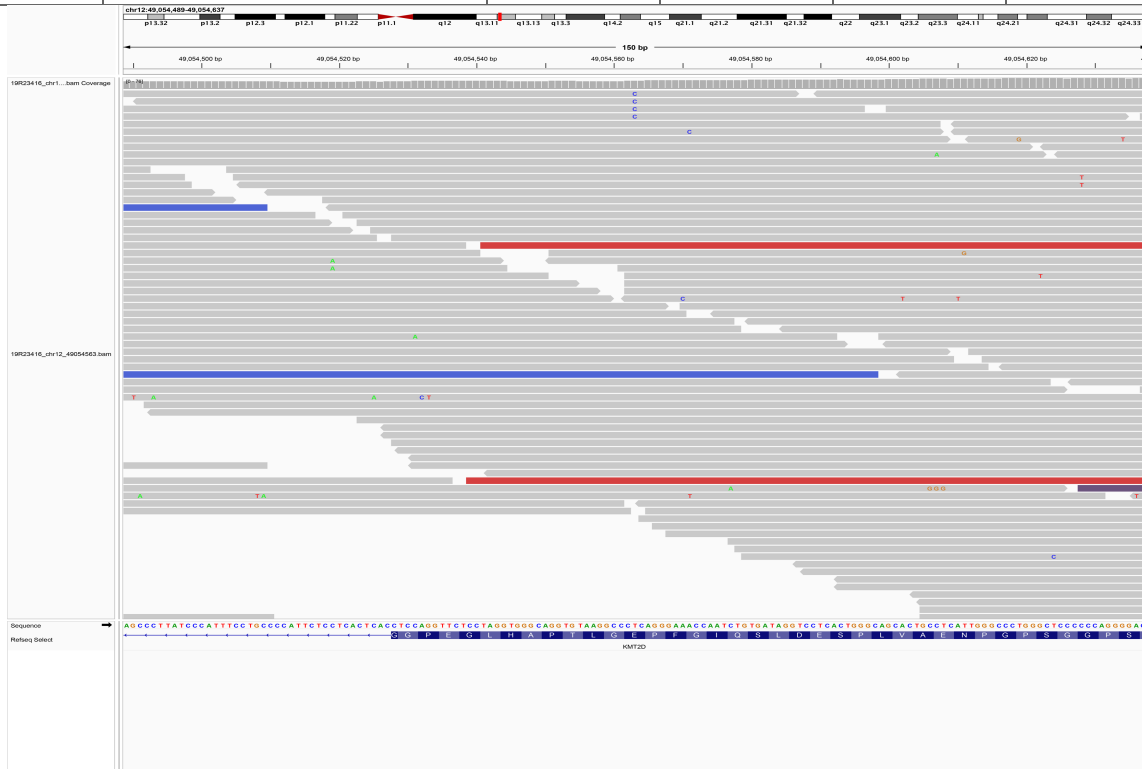

1.134. chr12\_49054743\_G/A

| SampleID    | Variants (GRCh38)  | Ref_depth | Alt_depth | Gene         | Consequence      |
|-------------|--------------------|-----------|-----------|--------------|------------------|
| 15HanTZ0029 | chr12_49054743_G/A | 47        | 5         | <i>KMT2D</i> | missense_variant |
| 18R03043    | chr12_49054743_G/A | 66        | 6         | <i>KMT2D</i> | missense_variant |

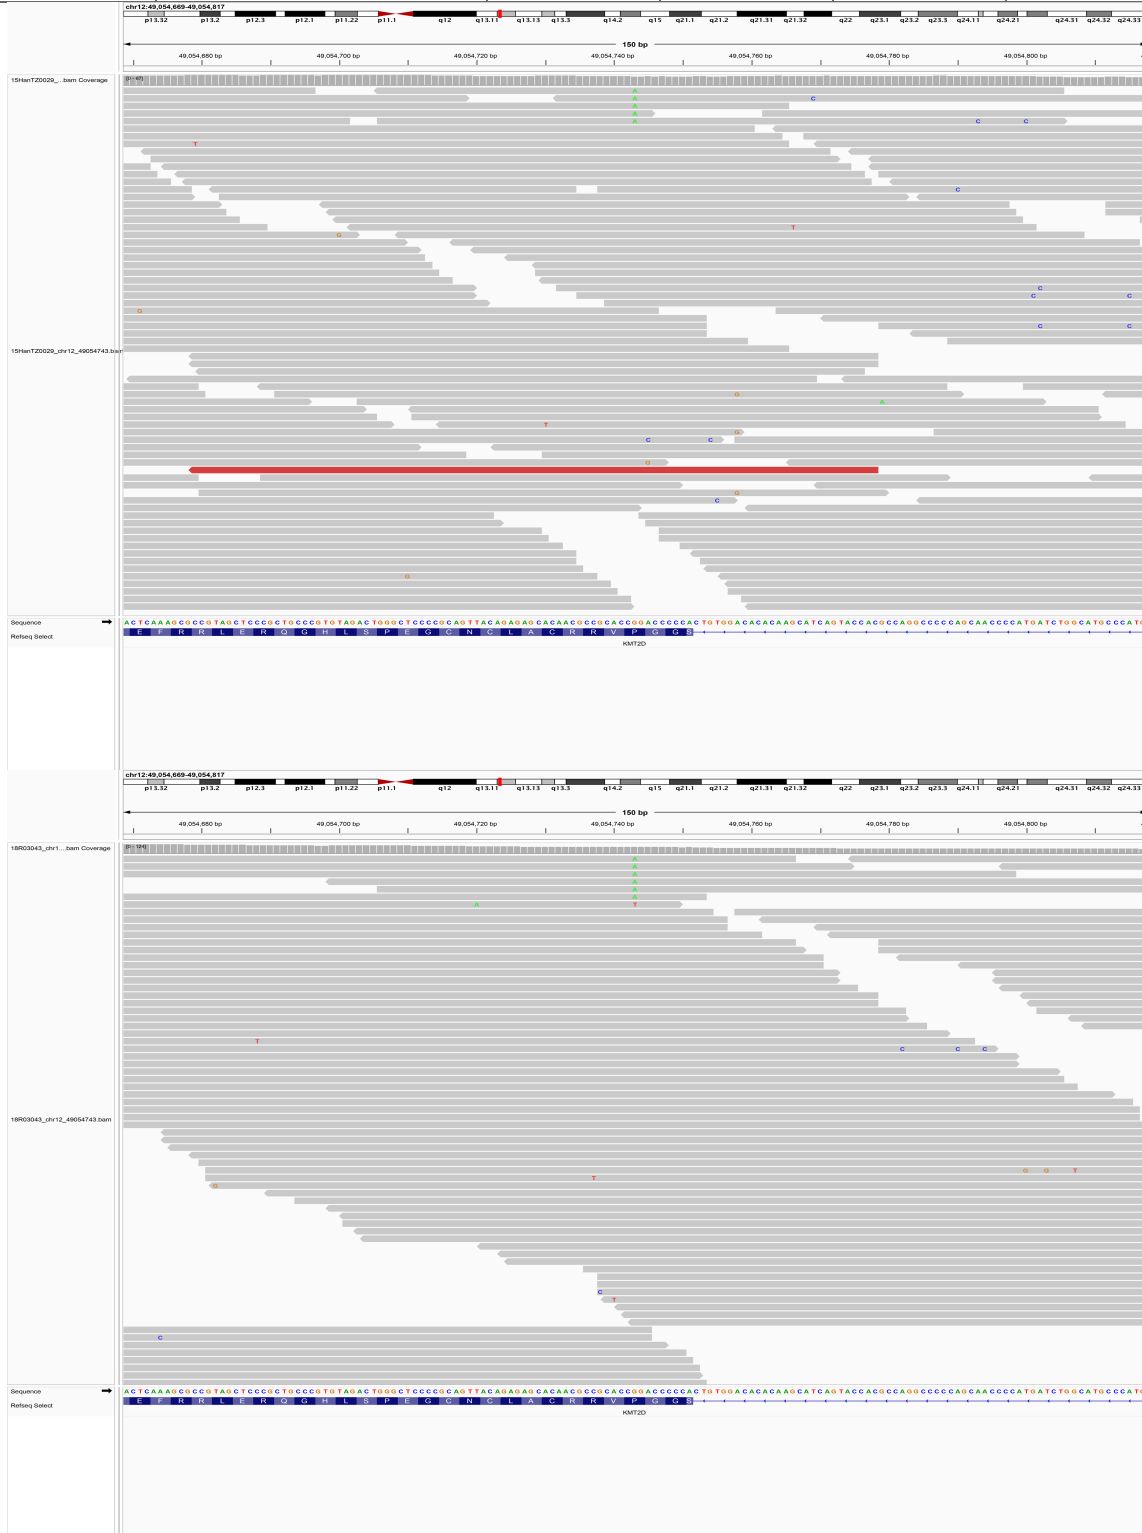

1.135. chr12\_49054751\_A/C

| SampleID | Variants (GRCh38)  | Ref_depth | Alt_depth | Gene  | Consequence      |
|----------|--------------------|-----------|-----------|-------|------------------|
| 19R35535 | chr12_49054751_A/C | 44        | 22        | KMT2D | missense_variant |

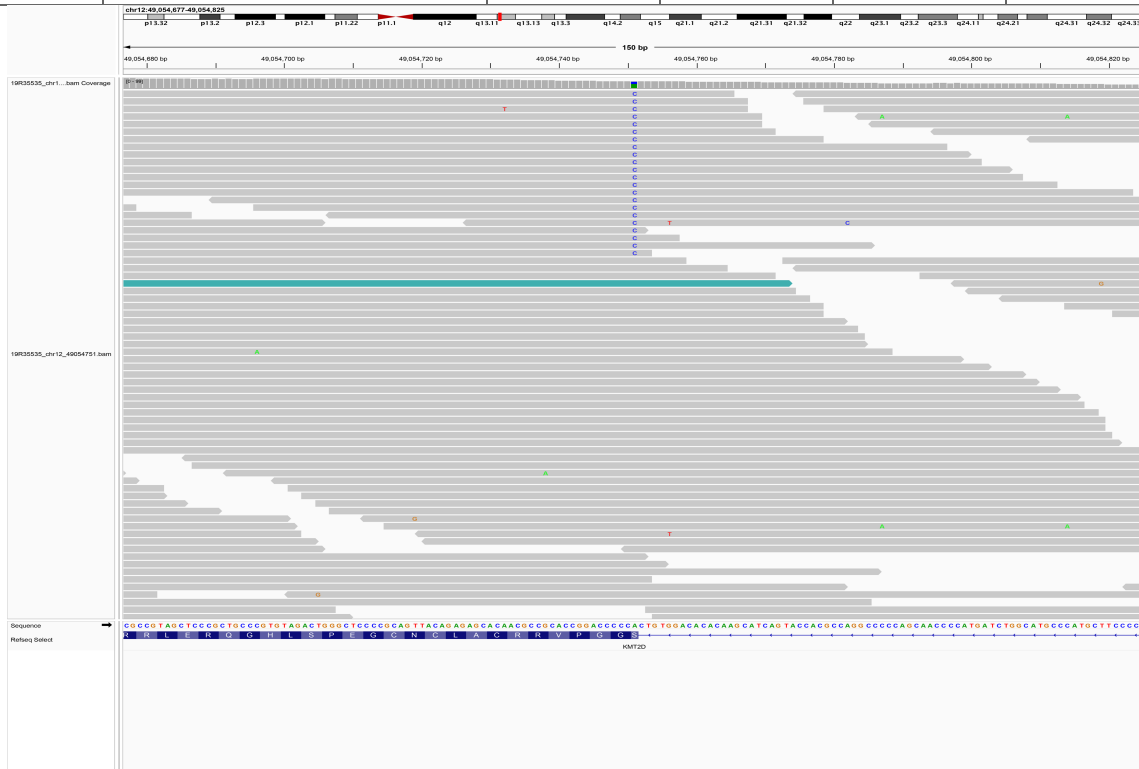

Supplement: Supplementary file 4 [file e6cbe1fa29550540b4ed2918.pdf]
