# Supplementary material
Source: Research Square preprint supplement (doi:10.21203/rs.3.rs-9041912/v1)
Supplement: Supplementary file 1 [file 1c80d1f7afc255b2a4cad47f.pdf]

### **Additional File 3**

#### **CHIP whitelist mutations identified and confirmed in the validation cohort.**

Listed are 93 CHIP whitelist mutations identified in 88 persons of the KGP Phase III cohort (N = 2,504 unrelated individuals). CHIP mutations identified as per the criteria used in Jaiswal et al.<sup>1</sup> Each CHIP variant has been manually reviewed independently by two researchers, by Integrative Genomics Viewer with reads support (related to **Table S6**).

## Table of Contents

|                                       |    |
|---------------------------------------|----|
| 1. ASXL2.....                         | 5  |
| 1.1. chr2_25878221_A/C.....           | 5  |
| 2. BRCC3.....                         | 6  |
| 2.1. chrX_155089261_A/G.....          | 6  |
| 3. CBL.....                           | 7  |
| 3.1. chr11_119299623_C/T.....         | 7  |
| 3.2. chr11_119285321_C/T.....         | 8  |
| 4. CBLB.....                          | 9  |
| 4.1. chr3_105704053_G/A.....          | 9  |
| 5. CTCF.....                          | 10 |
| 5.1. chr16_67636812_C/T.....          | 10 |
| 5.2. chr16_67610835_G/A.....          | 11 |
| 6. DNMT3A.....                        | 12 |
| 6.1. chr2_25245286_GGGGTGTTCCA/-..... | 12 |
| 6.2. chr2_25240378_C/T.....           | 13 |
| 6.3. chr2_25241675_C/T.....           | 14 |
| 6.4. chr2_25246764_G/A.....           | 15 |
| 6.5. chr2_25247647_G/A.....           | 16 |
| 6.6. chr2_25247629_G/A.....           | 17 |
| 6.7. chr2_25240718_C/T.....           | 18 |
| 6.8. chr2_25234297_-/CT.....          | 19 |
| 6.9. chr2_25240315_G/A.....           | 20 |
| 6.10. chr2_25244214_G/A.....          | 21 |
| 6.11. chr2_25244608_G/C.....          | 22 |
| 6.12. chr2_25236968_G/A.....          | 23 |
| 6.13. chr2_25234367_G/A.....          | 24 |
| 6.14. chr2_25240429_AAG/-.....        | 25 |
| 6.15. chr2_25240700_T/A.....          | 26 |
| 6.16. chr2_25244654_T/G.....          | 27 |
| 6.17. chr2_25245276_C/A.....          | 28 |
| 6.18. chr2_25247160_T/C.....          | 29 |
| 6.19. chr2_25241617_C/T.....          | 30 |
| 7. GNA13.....                         | 31 |
| 7.1. chr17_65014600_C/T.....          | 31 |
| 8. KMT2A.....                         | 32 |
| 8.1. chr11_118436806_A/-.....         | 32 |
| 9. KMT2D.....                         | 33 |
| 9.1. chr12_49037395_G/A.....          | 33 |
| 9.2. chr12_49037173_G/A.....          | 34 |

|                                                    |    |
|----------------------------------------------------|----|
| 9.3. chr12_49041148_G/A.....                       | 35 |
| 9.4. chr12_49053302_T/A.....                       | 36 |
| 9.5. chr12_49039611_G/A.....                       | 37 |
| 9.6. chr12_49052175_AG/-.....                      | 38 |
| 10. <i>MPL</i> .....                               | 39 |
| 10.1. chr1_43352251_A/T.....                       | 39 |
| 11. <i>NF1</i> .....                               | 40 |
| 11.1. chr17_31226460_-/C.....                      | 40 |
| 11.2. chr17_31338743_AGTC A/-.....                 | 41 |
| 11.3. chr17_31343098_-/T.....                      | 42 |
| 12. <i>NRAS</i> .....                              | 43 |
| 12.1. chr1_114716126_C/T.....                      | 43 |
| 13. <i>PHF6</i> .....                              | 44 |
| 13.1. chrX_134378107_G/A.....                      | 44 |
| 14. <i>PPM1D</i> .....                             | 45 |
| 14.1. chr17_60663270_T/-.....                      | 45 |
| 14.2. chr17_60663320_-/C.....                      | 46 |
| 14.3. chr17_60663313_G/T.....                      | 47 |
| 14.4. chr17_60662995_T/A.....                      | 48 |
| 14.5. chr17_60663106_C/T.....                      | 49 |
| 15. <i>PRPF40B</i> .....                           | 50 |
| 15.1. chr12_49643754_T/G.....                      | 50 |
| 16. <i>PTEN</i> .....                              | 51 |
| 16.1. chr10_87933035_C/A.....                      | 51 |
| 17. <i>RAD21</i> .....                             | 52 |
| 17.1. chr8_116850698_G/A.....                      | 52 |
| 18. <i>RUNX1</i> .....                             | 53 |
| 18.1. chr21_34834466_-/GG.....                     | 53 |
| 19. <i>SETD2</i> .....                             | 54 |
| 19.1. chr3_47123018_G/A.....                       | 54 |
| 19.2. chr3_47124063_-/A.....                       | 55 |
| 19.3. chr3_47122588_A/T.....                       | 56 |
| 19.4. chr3_47113999_G/-.....                       | 57 |
| 19.5. chr3_47120294_AGGGCCCAACCAGTGCTGAACCT/-..... | 58 |
| 19.6. chr3_47123534_G/A.....                       | 59 |
| 19.7. chr3_47113934_C/A.....                       | 60 |
| 19.8. chr3_47062227_G/A.....                       | 61 |
| 19.9. chr3_47101520_-/A.....                       | 62 |
| 19.10. chr3_47122102_G/C.....                      | 63 |
| 19.11. chr3_47056886_G/A.....                      | 64 |
| 19.12. chr3_47121944_AG/-.....                     | 65 |

|                                                                |    |
|----------------------------------------------------------------|----|
| 19.13. chr3_47120398_CTCT/- .....                              | 66 |
| 20. <i>SETDB1</i> .....                                        | 67 |
| 20.1. chr1_150945053_G/A.....                                  | 67 |
| 21. <i>STAG2</i> .....                                         | 68 |
| 21.1. chrX_124071271_C/-.....                                  | 68 |
| 21.2. chrX_124066217_C/A .....                                 | 69 |
| 22. <i>TET2</i> .....                                          | 70 |
| 22.1. chr4_105275340_T/- .....                                 | 70 |
| 22.2. chr4_105276118_T/C .....                                 | 71 |
| 22.3. chr4_105269676_G/T .....                                 | 72 |
| 22.4. chr4_105234521_T/- .....                                 | 73 |
| 22.5. chr4_105236859_-/TG.....                                 | 74 |
| 22.6. chr4_105275548_C/T .....                                 | 75 |
| 22.7. chr4_105241383_-/G .....                                 | 76 |
| 22.8. chr4_105234442_C/G .....                                 | 77 |
| 22.9. chr4_105241421_G/A.....                                  | 78 |
| 22.10. chr4_105259617_A/G.....                                 | 79 |
| 22.11. chr4_105236813_-/A .....                                | 80 |
| 22.12. chr4_105276106_C/T .....                                | 81 |
| 22.13. chr4_105235265_-/T .....                                | 82 |
| 22.14. chr4_105269640_C/T .....                                | 83 |
| 22.15. chr4_105276152_A/G.....                                 | 84 |
| 22.16. chr4_105272774_C/T .....                                | 85 |
| 22.17. chr4_105243739_-/A .....                                | 86 |
| 22.18. chr4_105235590_C/T .....                                | 87 |
| 22.19. chr4_105234536_A/- .....                                | 88 |
| 22.20. chr4_105237346_G/A.....                                 | 89 |
| 22.21. chr4_105259675_T/G.....                                 | 90 |
| 22.22. chr4_105242911_G/A.....                                 | 91 |
| 22.23. chr4_105241429_G/T .....                                | 92 |
| 23. <i>TP53</i> .....                                          | 93 |
| 23.1. chr17_7675229_GGGGAGTACTGTAGGAAGAGGAAGGAGACAGAGTT/-..... | 93 |
| 23.2. chr17_7674252_C/T .....                                  | 94 |
| 24. <i>WT1</i> .....                                           | 95 |
| 24.1. chr11_32428050_G/A.....                                  | 95 |
| 24.2. chr11_32396377_-/GACC .....                              | 96 |
| 24.3. chr11_32396374_G/- .....                                 | 97 |

# 1. ASXL2

## 1.1. chr2\_25878221\_A/C

| SampleID | Variants (GRCh38) | Ref_depth | Alt_depth | Gene  | Consequence |
|----------|-------------------|-----------|-----------|-------|-------------|
| NA19004  | chr2_25878221_A/C | 48        | 6         | ASXL2 | start_lost  |

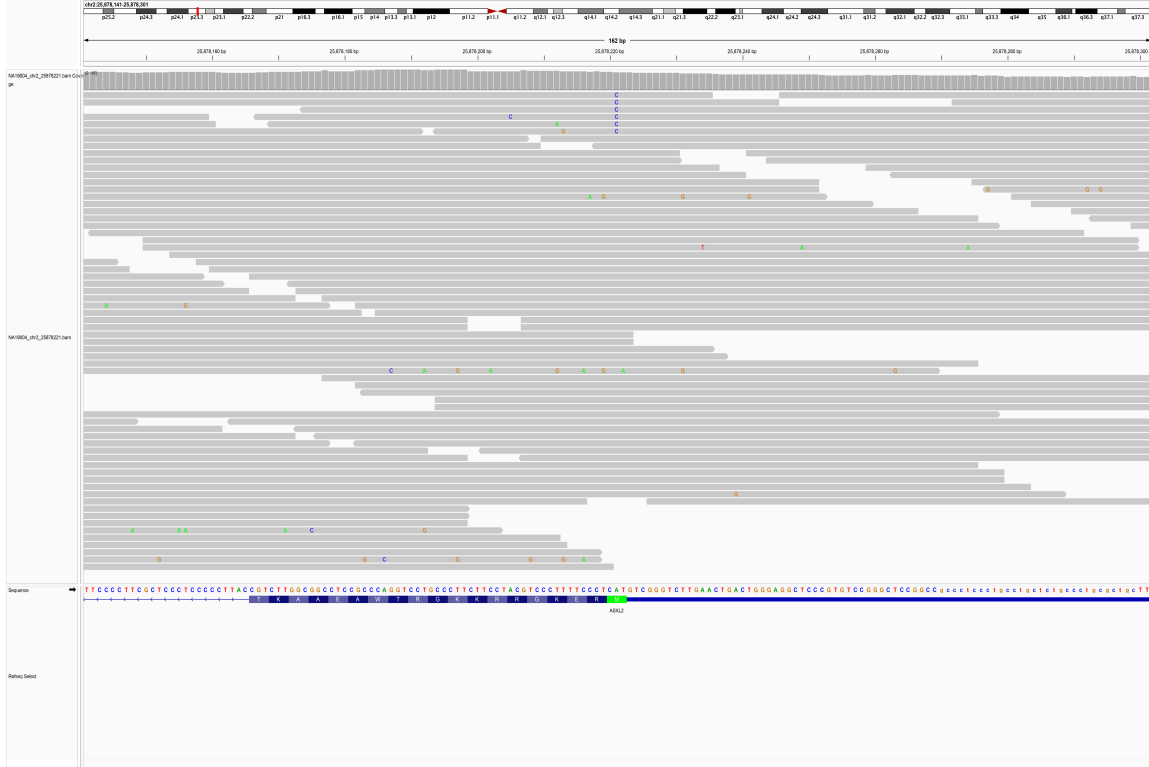

## 2. BRCC3

### 2.1. chrX\_155089261\_A/G

| SampleID | Variants (GRCh38)  | Ref_depth | Alt_depth | Gene  | Consequence                 |
|----------|--------------------|-----------|-----------|-------|-----------------------------|
| HG03354  | chrX_155089261_A/G | 21        | 8         | BRCC3 | splice_acceptor_varia<br>nt |

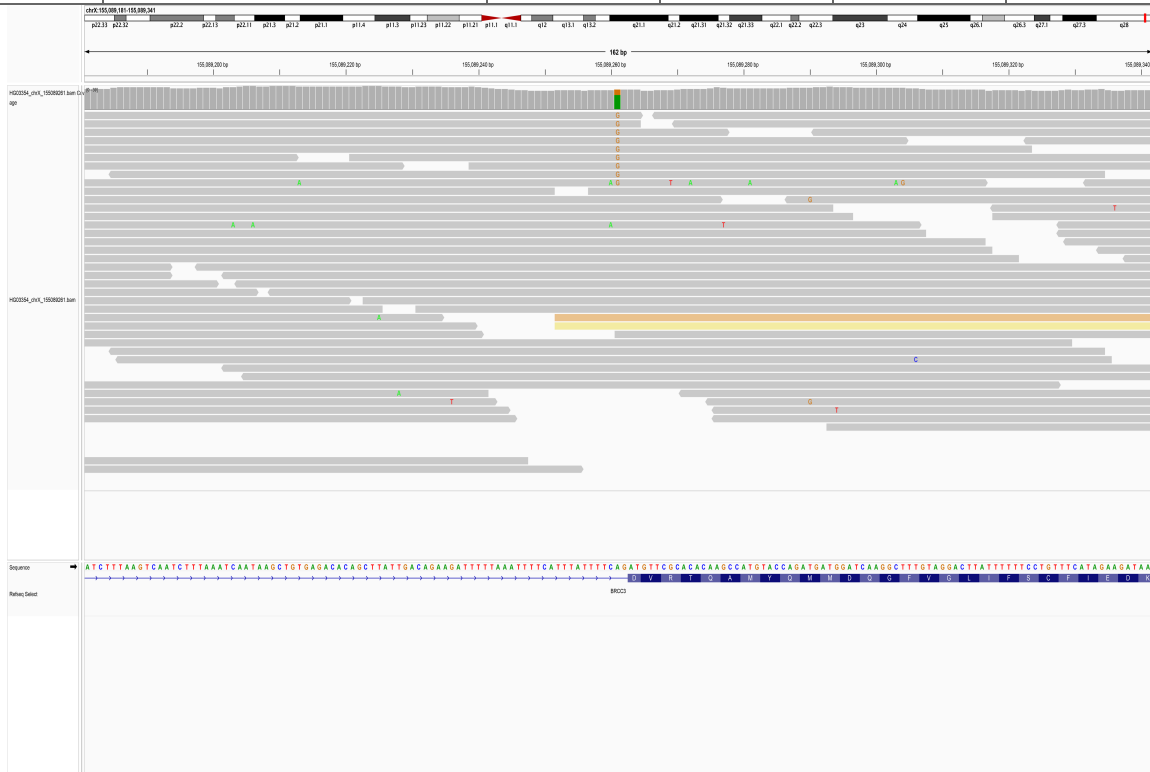

### 3. CBL

#### 3.1. chr11\_119299623\_C/T

| SampleID | Variants (GRCh38)   | Ref_depth | Alt_depth | Gene | Consequence      |
|----------|---------------------|-----------|-----------|------|------------------|
| HG02604  | chr11_119299623_C/T | 32        | 3         | CBL  | missense_variant |

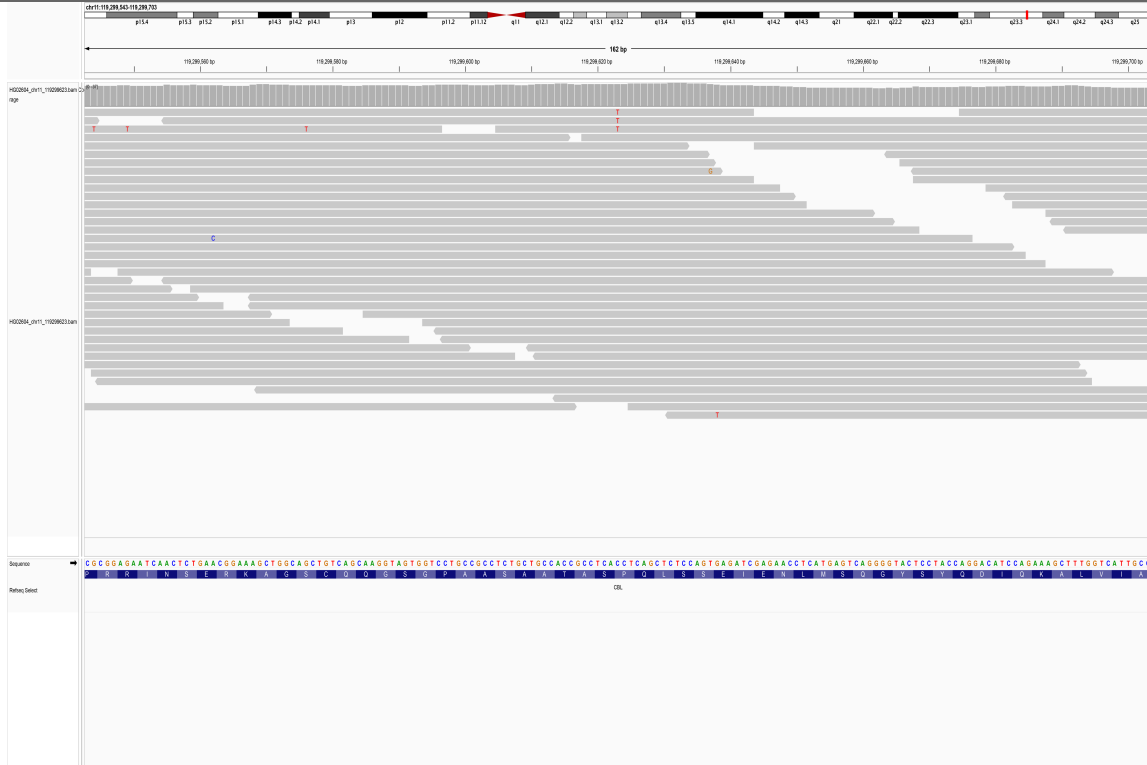

### 3.2. chr11\_119285321\_C/T

| SampleID | Variants (GRCh38)   | Ref_depth | Alt_depth | Gene       | Consequence      |
|----------|---------------------|-----------|-----------|------------|------------------|
| HG04018  | chr11_119285321_C/T | 22        | 5         | <i>CBL</i> | missense_variant |

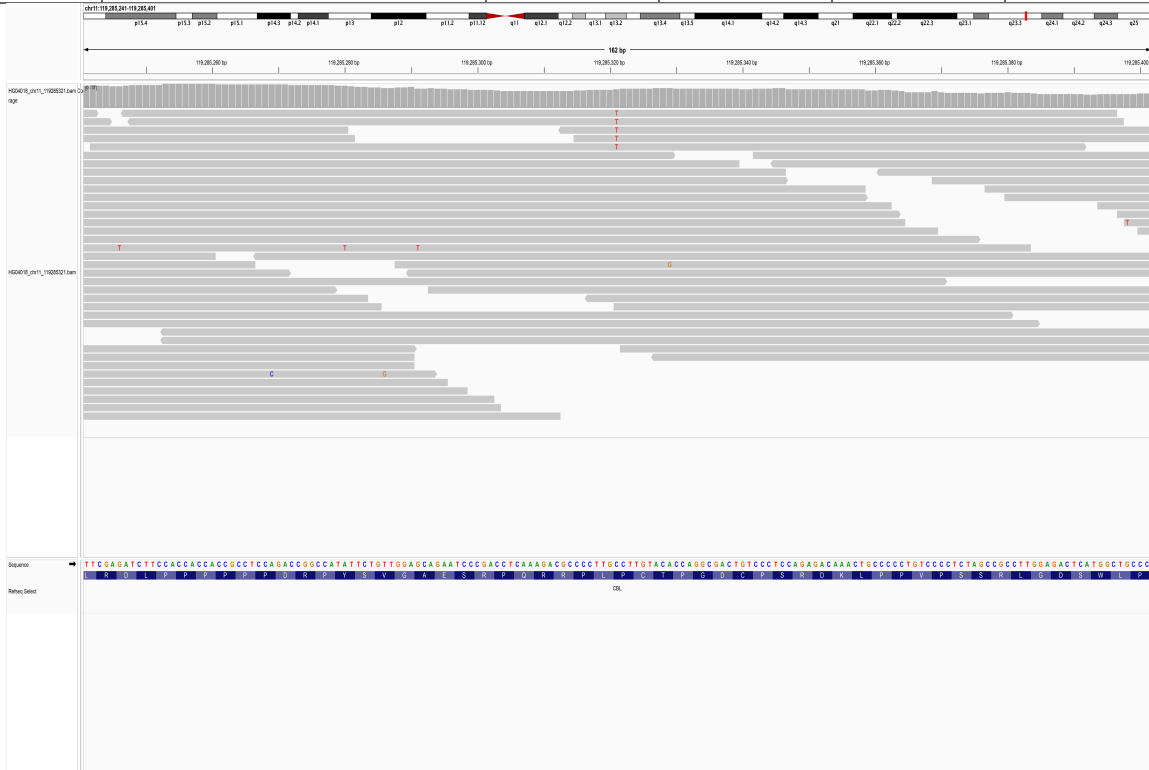

#### 4. CBLB

##### 4.1. chr3\_105704053\_G/A

| SampleID | Variants (GRCh38)  | Ref_depth | Alt_depth | Gene | Consequence      |
|----------|--------------------|-----------|-----------|------|------------------|
| NA20768  | chr3_105704053_G/A | 30        | 8         | CBLB | missense_variant |

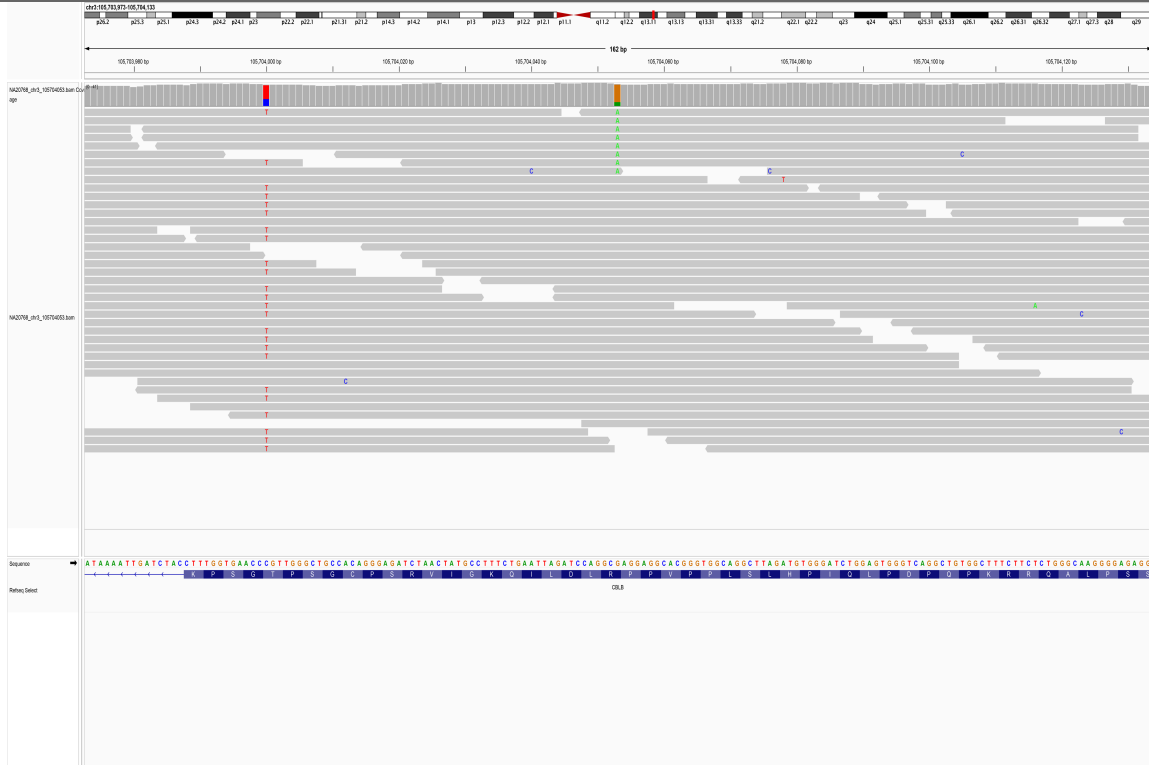

## 5. CTCF

### 5.1. chr16\_67636812\_C/T

| SampleID | Variants (GRCh38)  | Ref_depth | Alt_depth | Gene | Consequence |
|----------|--------------------|-----------|-----------|------|-------------|
| NA18647  | chr16_67636812_C/T | 32        | 8         | CTCF | stop_gained |

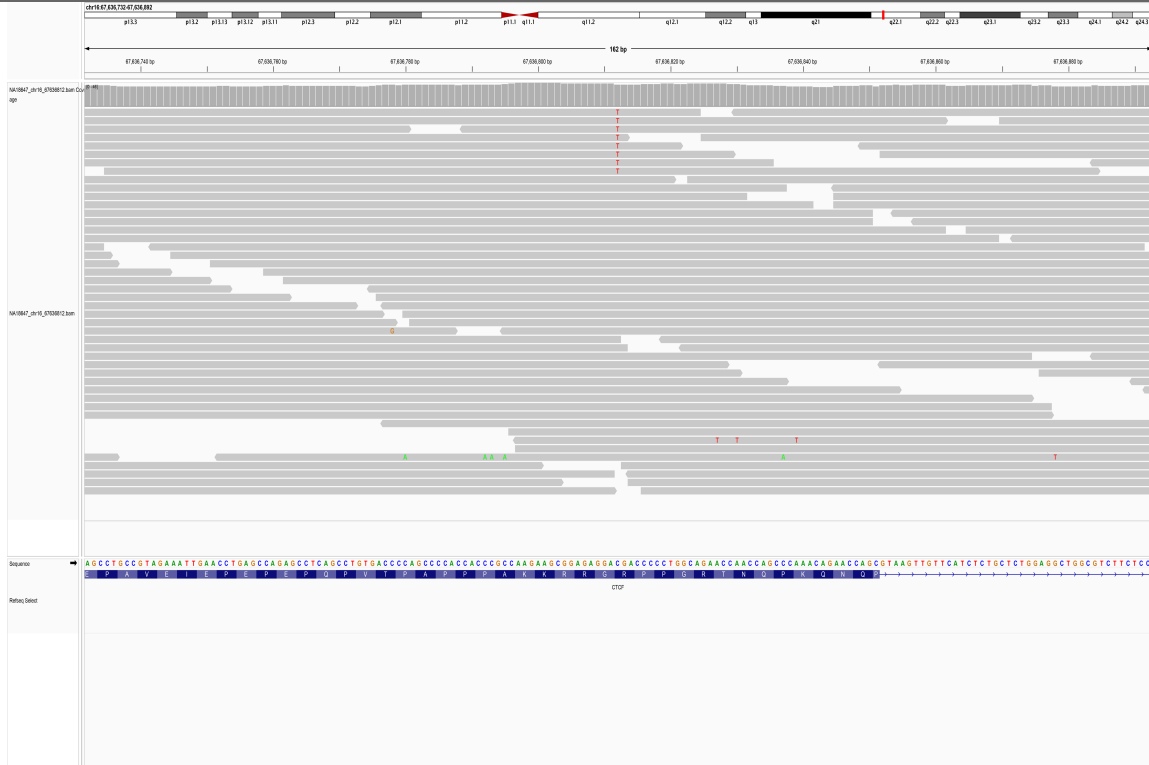

### 5.2. chr16\_67610835\_G/A

| SampleID | Variants (GRCh38)  | Ref_depth | Alt_depth | Gene | Consequence |
|----------|--------------------|-----------|-----------|------|-------------|
| NA20296  | chr16_67610835_G/A | 28        | 3         | CTCF | start_lost  |

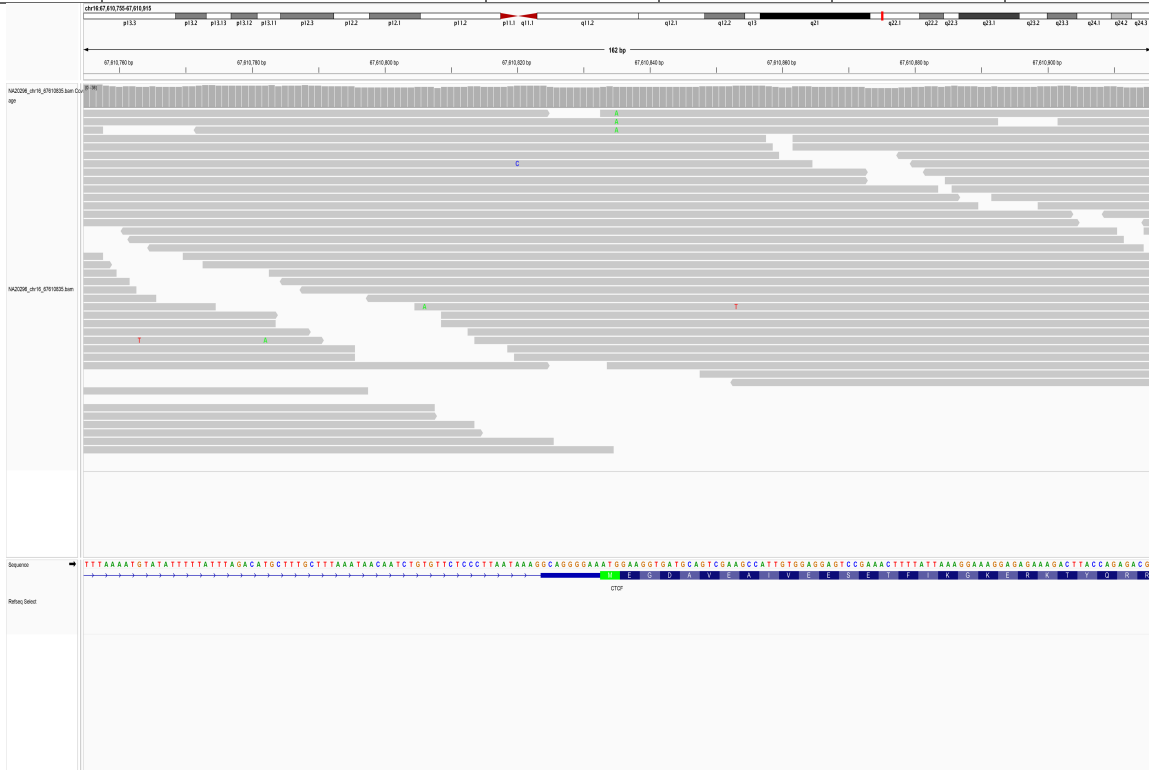

## 6. DNMT3A

### 6.1. chr2\_25245286\_GGGGTGTTCCA/-

| SampleID | Variants (GRCh38)               | Ref_depth | Alt_depth | Gene   | Consequence        |
|----------|---------------------------------|-----------|-----------|--------|--------------------|
| HG00173  | chr2_25245286_GGGGTGT<br>TCCA/- | 29        | 7         | DNMT3A | frameshift_variant |

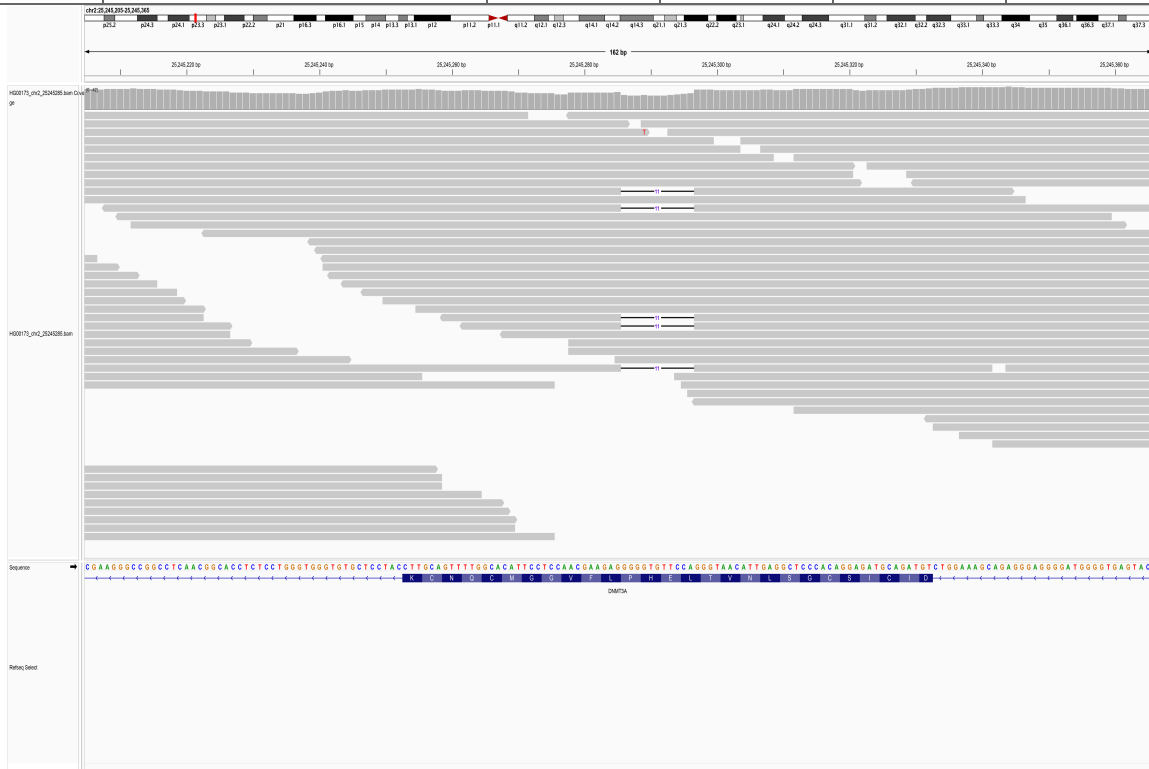

### 6.2. chr2\_25240378\_C/T

| SampleID | Variants (GRCh38) | Ref_depth | Alt_depth | Gene   | Consequence      |
|----------|-------------------|-----------|-----------|--------|------------------|
| HG00704  | chr2_25240378_C/T | 37        | 6         | DNMT3A | missense_variant |

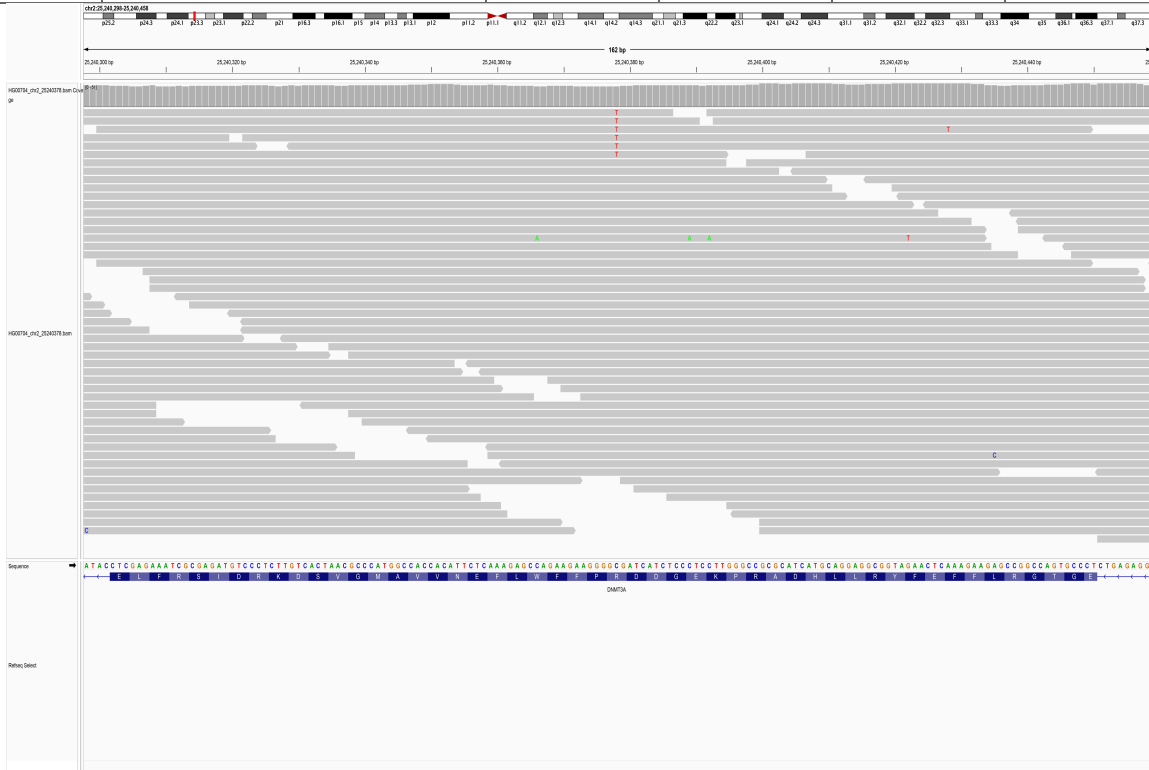

### 6.3. chr2\_25241675\_C/T

| SampleID | Variants (GRCh38) | Ref_depth | Alt_depth | Gene   | Consequence      |
|----------|-------------------|-----------|-----------|--------|------------------|
| HG01080  | chr2_25241675_C/T | 29        | 6         | DNMT3A | missense_variant |

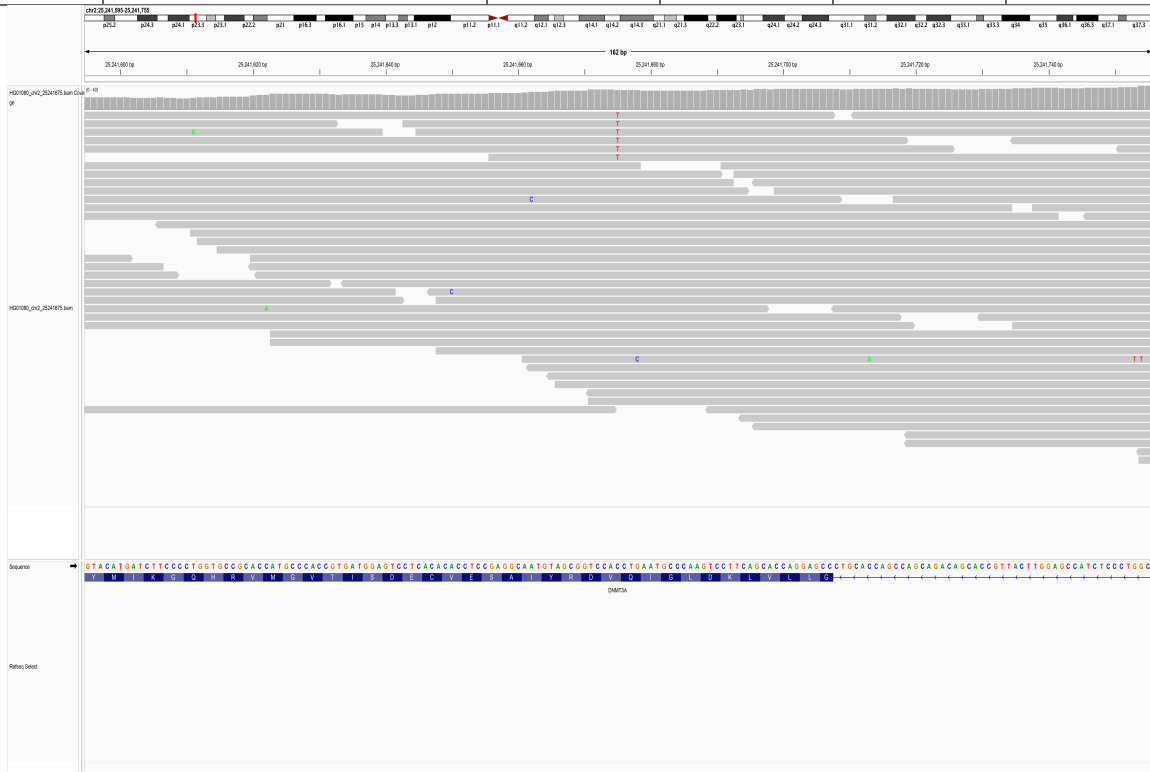

### 6.4. chr2\_25246764\_G/A

| SampleID | Variants (GRCh38) | Ref_depth | Alt_depth | Gene   | Consequence      |
|----------|-------------------|-----------|-----------|--------|------------------|
| HG01171  | chr2_25246764_G/A | 42        | 11        | DNMT3A | missense_variant |

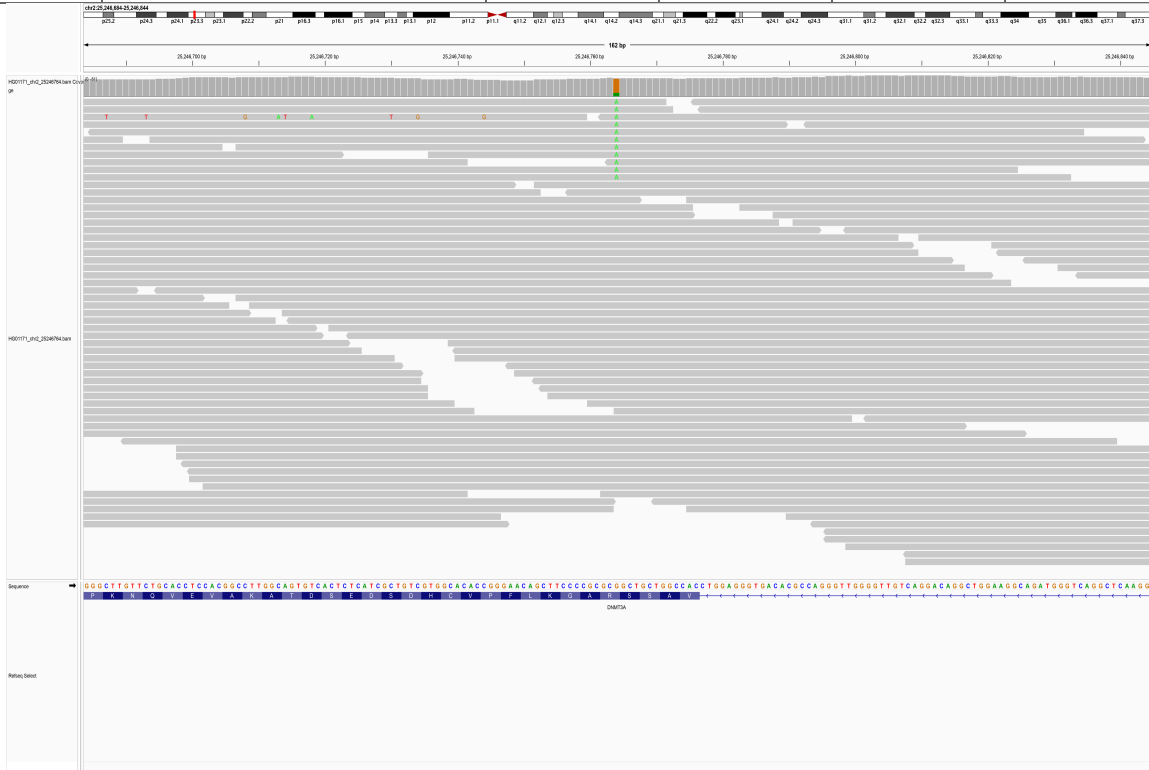

### 6.5. chr2\_25247647\_G/A

| SampleID | Variants (GRCh38) | Ref_depth | Alt_depth | Gene   | Consequence |
|----------|-------------------|-----------|-----------|--------|-------------|
| HG01485  | chr2_25247647_G/A | 35        | 5         | DNMT3A | stop_gained |

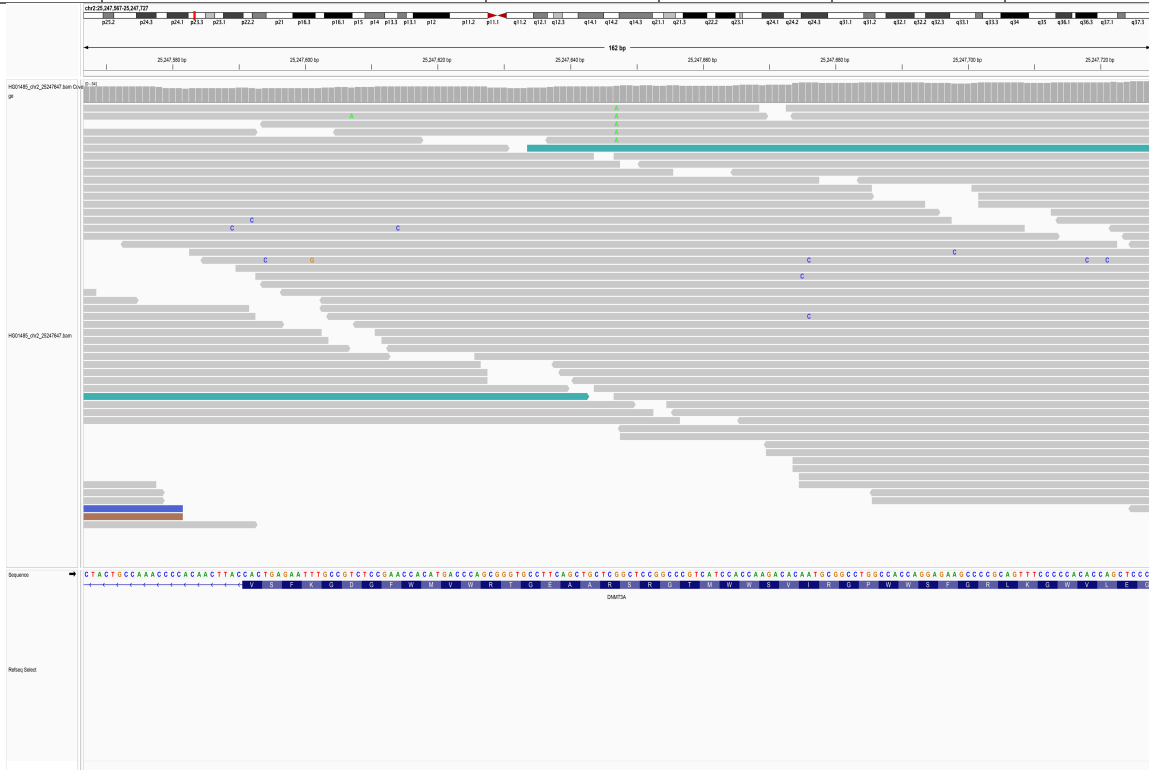

### 6.6. chr2\_25247629\_G/A

| SampleID | Variants (GRCh38) | Ref_depth | Alt_depth | Gene   | Consequence      |
|----------|-------------------|-----------|-----------|--------|------------------|
| HG01537  | chr2_25247629_G/A | 37        | 3         | DNMT3A | missense_variant |

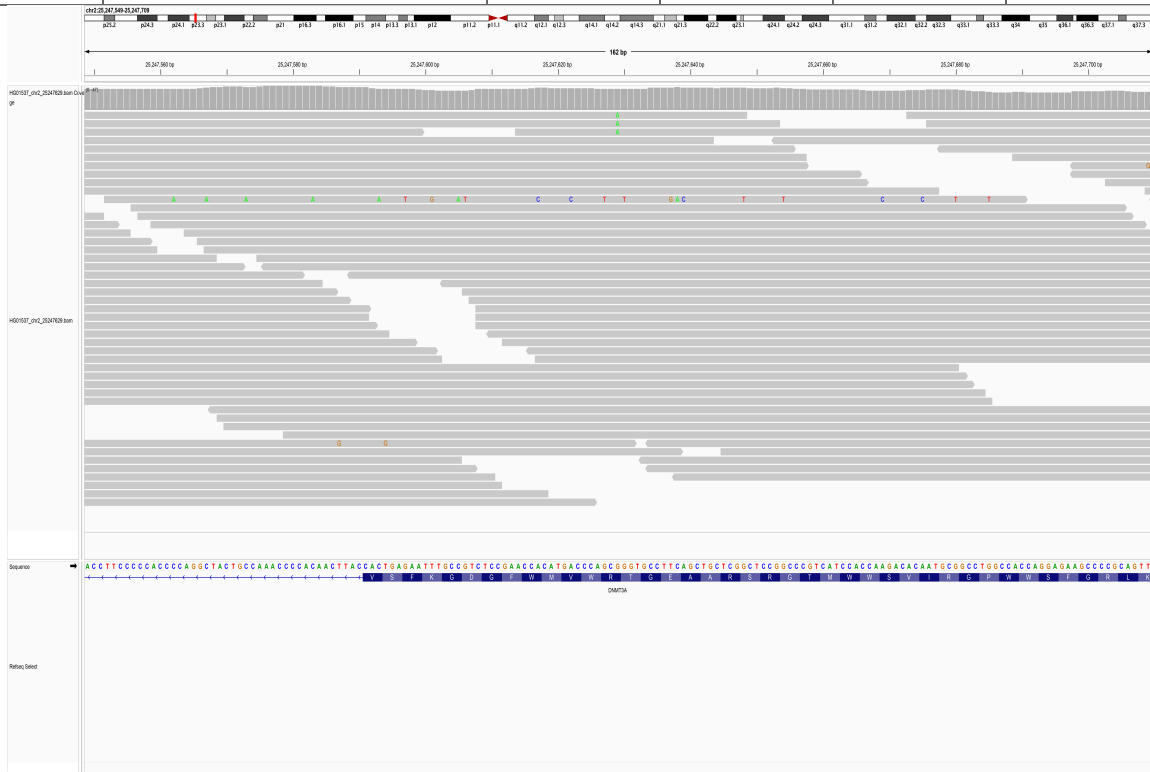

### 6.7. chr2\_25240718\_C/T

| SampleID | Variants (GRCh38) | Ref_depth | Alt_depth | Gene   | Consequence      |
|----------|-------------------|-----------|-----------|--------|------------------|
| HG01765  | chr2_25240718_C/T | 32        | 7         | DNMT3A | missense_variant |

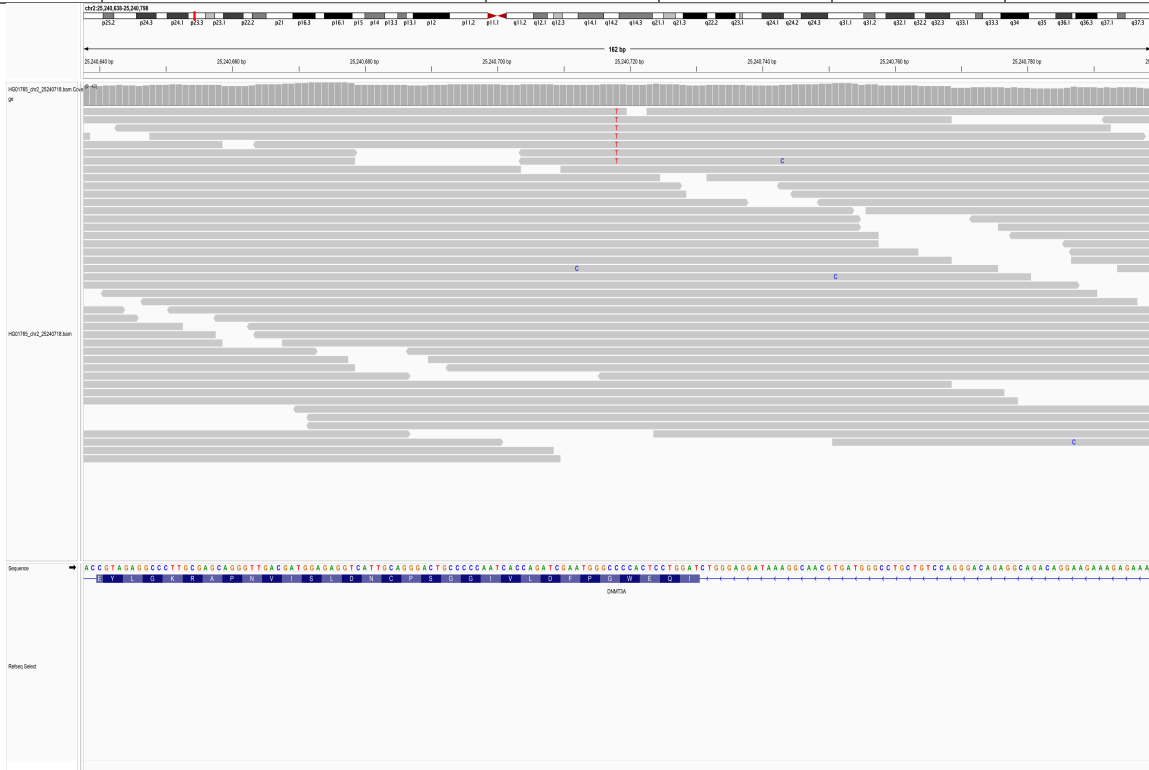



### 6.9. chr2\_25240315\_G/A

| SampleID | Variants (GRCh38) | Ref_depth | Alt_depth | Gene   | Consequence      |
|----------|-------------------|-----------|-----------|--------|------------------|
| HG02025  | chr2_25240315_G/A | 39        | 10        | DNMT3A | missense_variant |

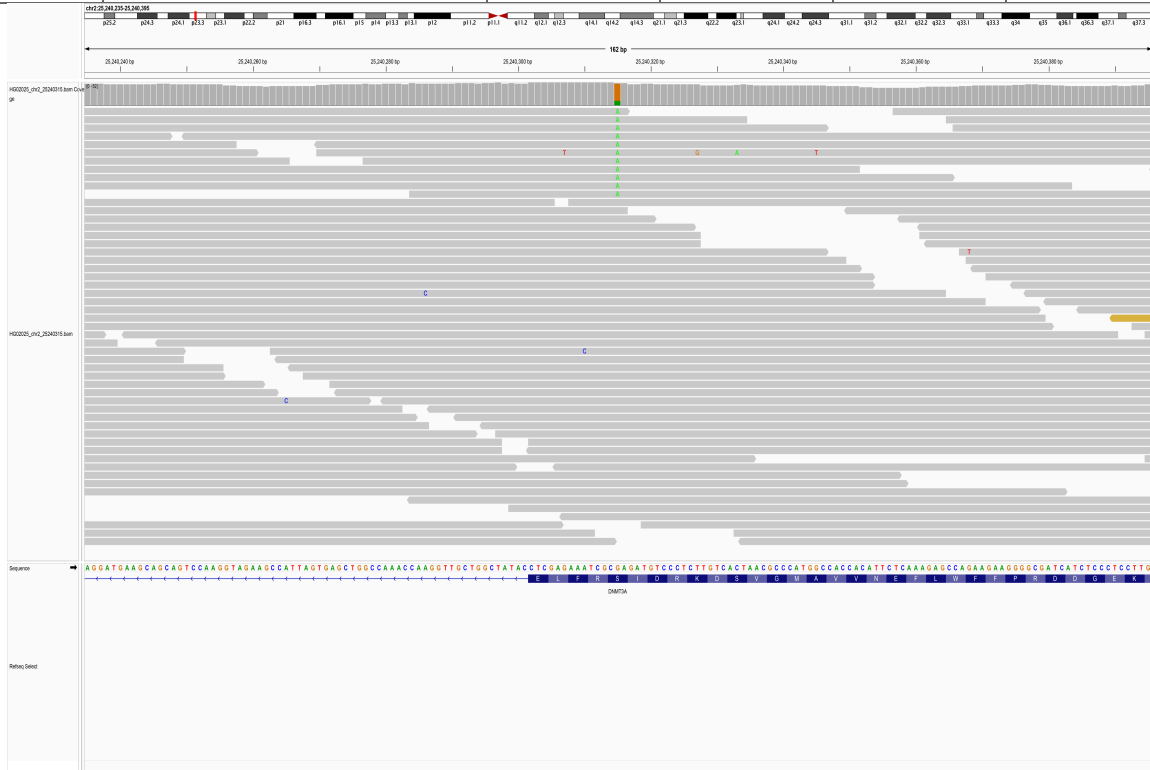

6.10. chr2\_25244214\_G/A

| SampleID | Variants (GRCh38) | Ref_depth | Alt_depth | Gene   | Consequence |
|----------|-------------------|-----------|-----------|--------|-------------|
| HG02502  | chr2_25244214_G/A | 32        | 5         | DNMT3A | stop_gained |

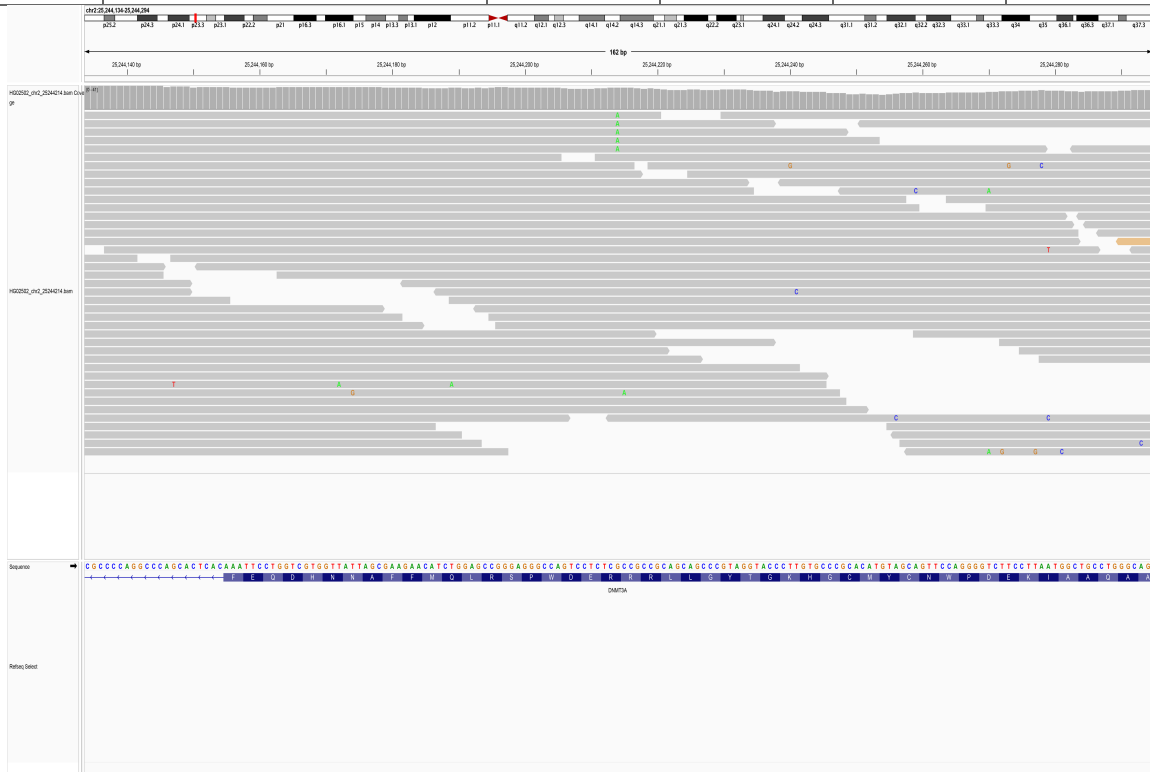

6.11. chr2\_25244608\_G/C

| SampleID | Variants (GRCh38) | Ref_depth | Alt_depth | Gene   | Consequence |
|----------|-------------------|-----------|-----------|--------|-------------|
| HG02604  | chr2_25244608_G/C | 35        | 5         | DNMT3A | stop_gained |

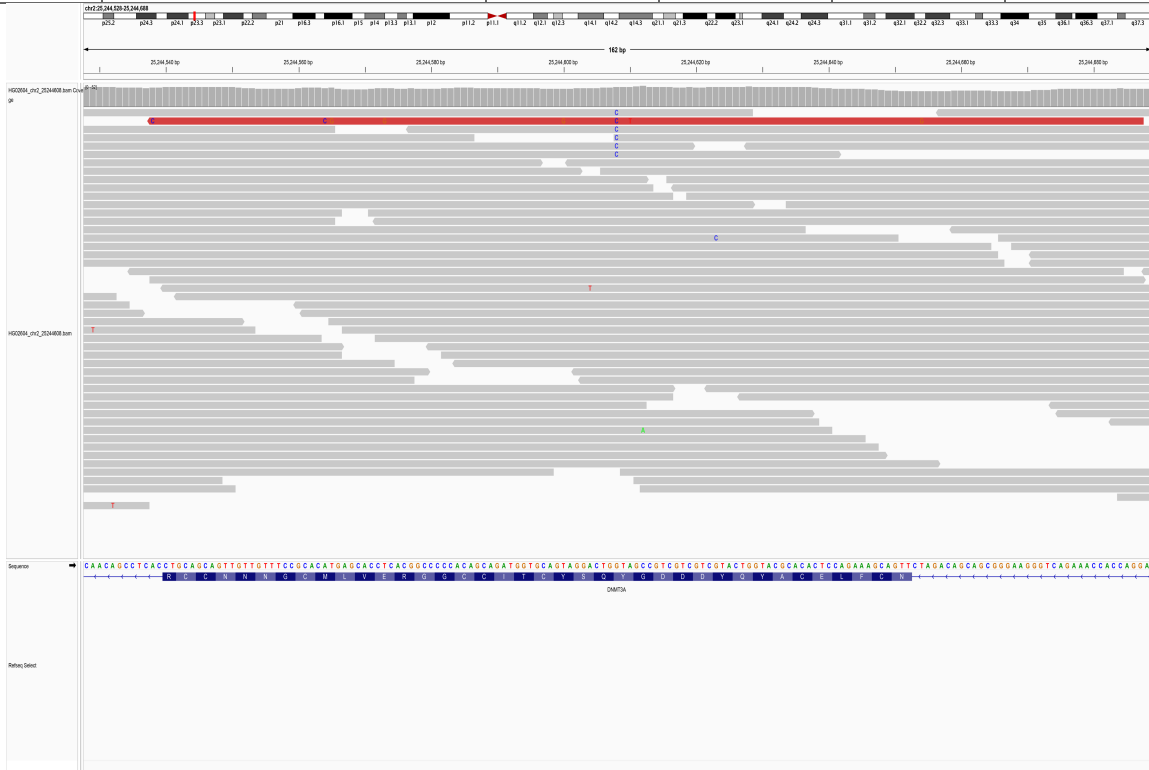

6.12. chr2\_25236968\_G/A

| SampleID | Variants (GRCh38) | Ref_depth | Alt_depth | Gene   | Consequence |
|----------|-------------------|-----------|-----------|--------|-------------|
| HG02722  | chr2_25236968_G/A | 23        | 4         | DNMT3A | stop_gained |

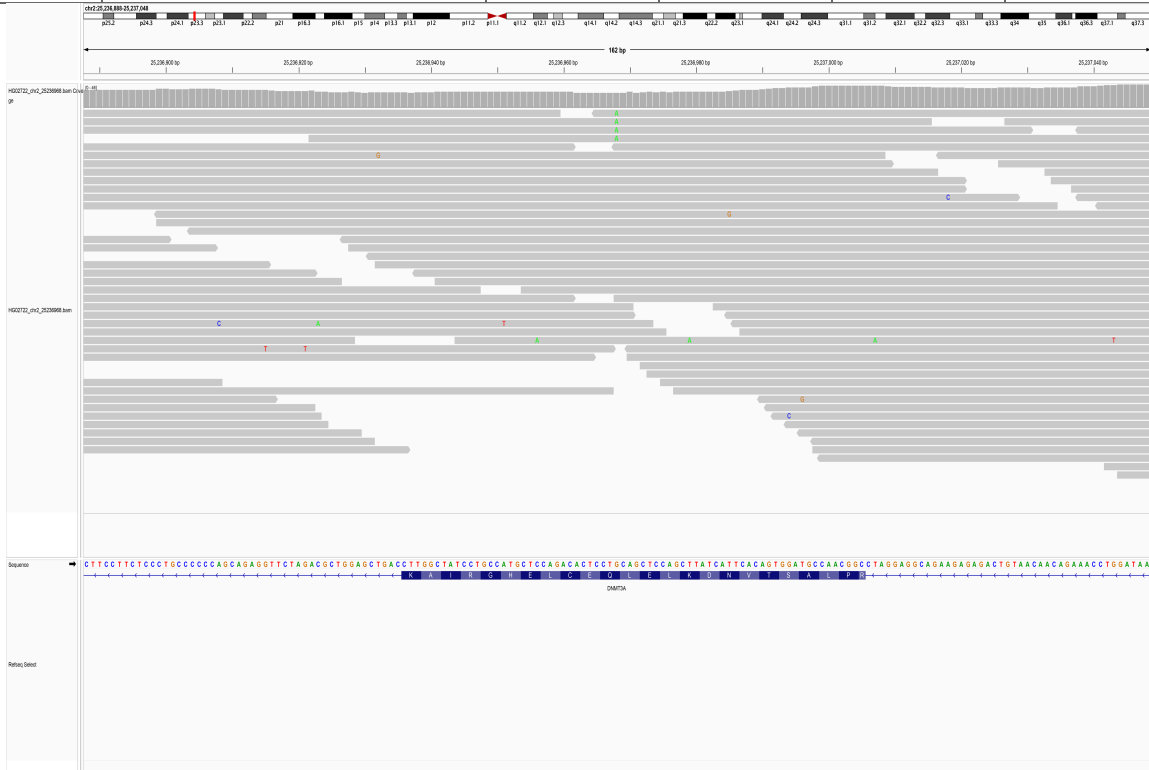

6.13. chr2\_25234367\_G/A

| SampleID | Variants (GRCh38) | Ref_depth | Alt_depth | Gene   | Consequence      |
|----------|-------------------|-----------|-----------|--------|------------------|
| HG03169  | chr2_25234367_G/A | 37        | 4         | DNMT3A | missense_variant |

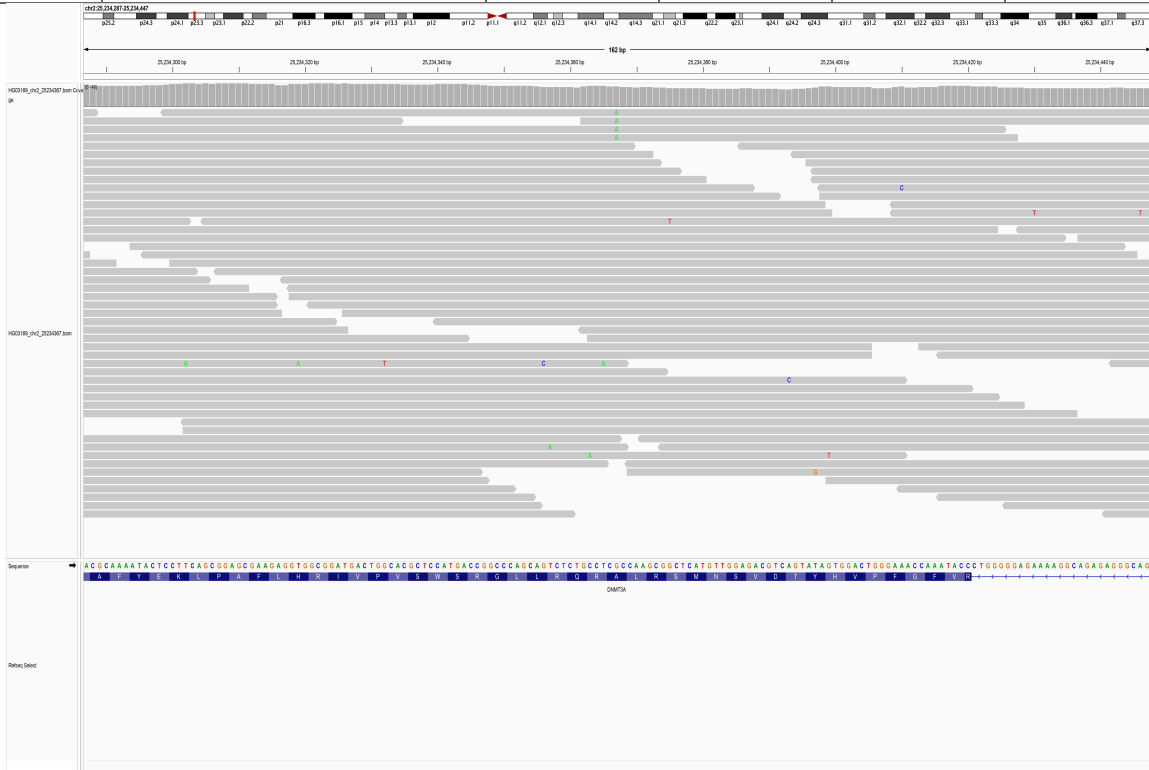

6.14. chr2\_25240429\_AAG/-

| SampleID | Variants (GRCh38)   | Ref_depth | Alt_depth | Gene   | Consequence      |
|----------|---------------------|-----------|-----------|--------|------------------|
| HG03354  | chr2_25240429_AAG/- | 37        | 6         | DNMT3A | inframe_deletion |

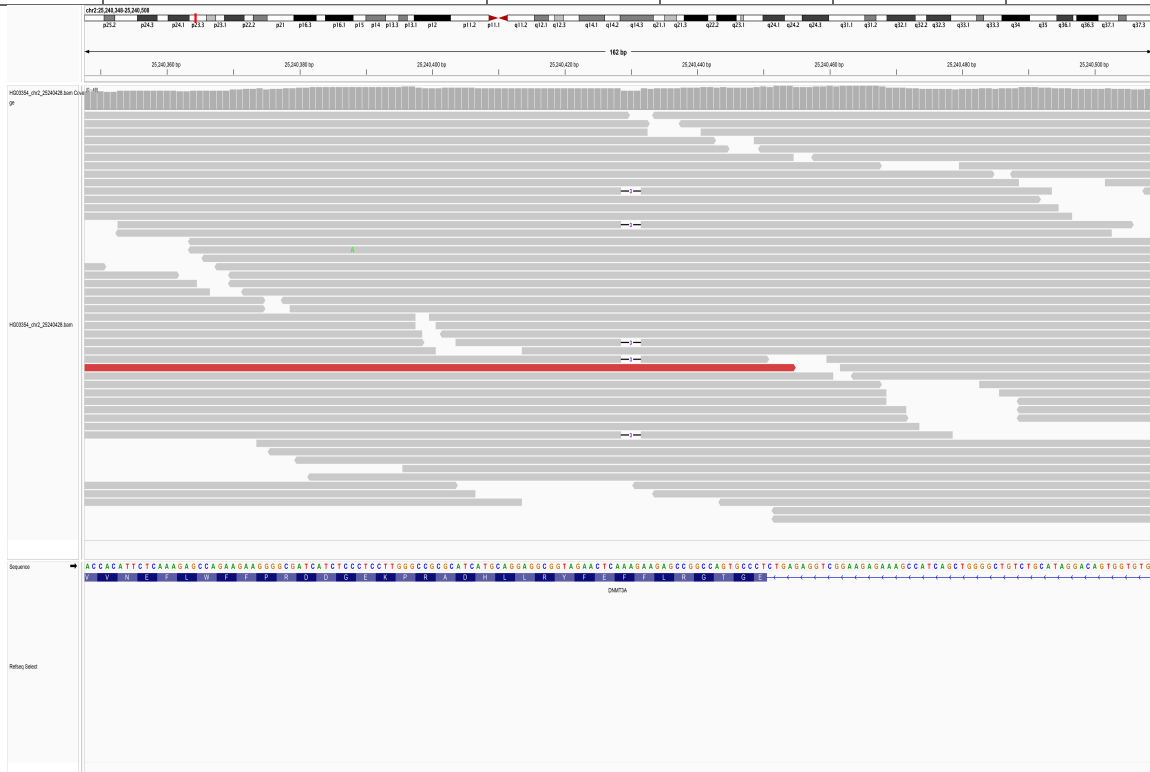

6.15. chr2\_25240700\_T/A

| SampleID | Variants (GRCh38) | Ref_depth | Alt_depth | Gene   | Consequence      |
|----------|-------------------|-----------|-----------|--------|------------------|
| HG03899  | chr2_25240700_T/A | 41        | 8         | DNMT3A | missense_variant |

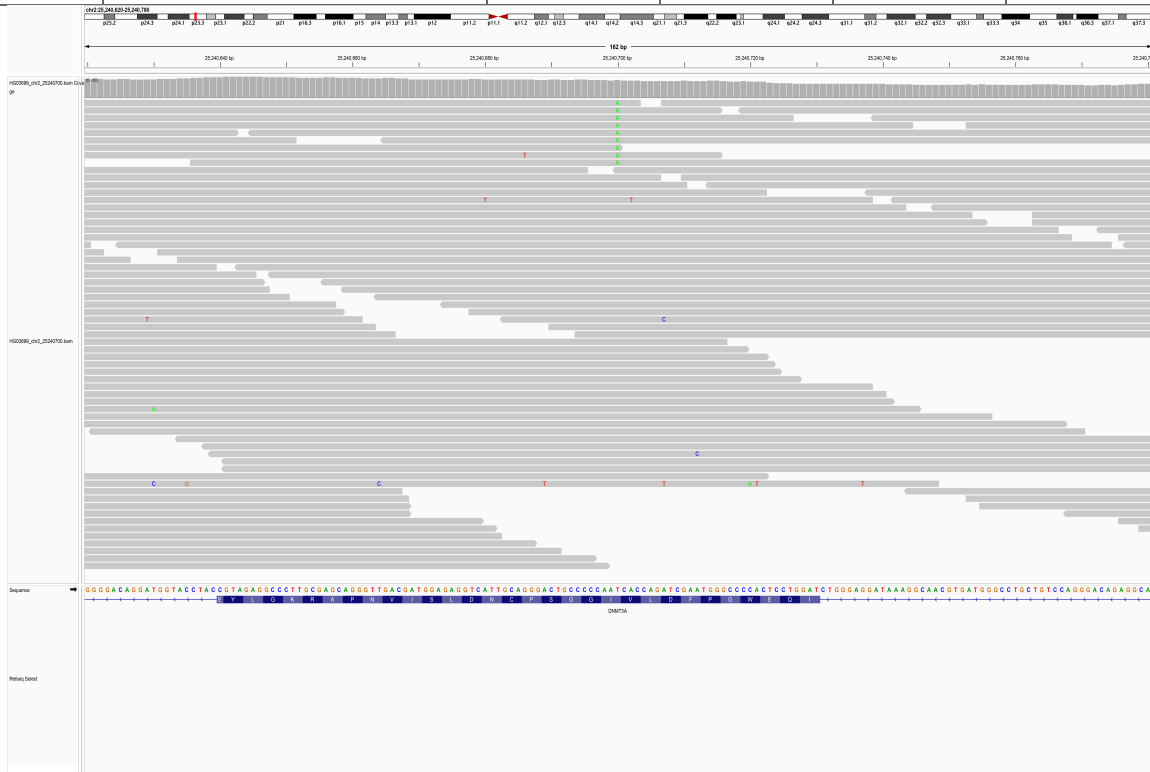

6.16. chr2\_25244654\_T/G

| SampleID | Variants (GRCh38) | Ref_depth | Alt_depth | Gene   | Consequence             |
|----------|-------------------|-----------|-----------|--------|-------------------------|
| NA11994  | chr2_25244654_T/G | 33        | 11        | DNMT3A | splice_acceptor_variant |

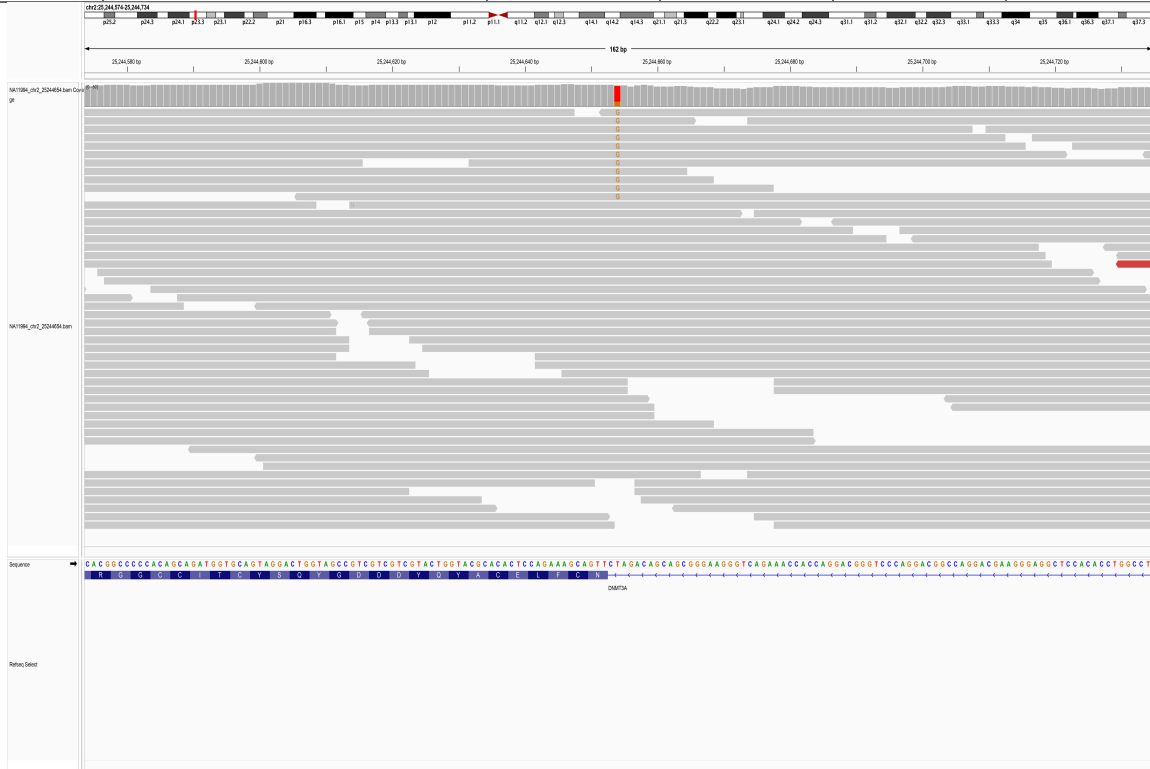

6.17. chr2\_25245276\_C/A

| SampleID | Variants (GRCh38) | Ref_depth | Alt_depth | Gene   | Consequence |
|----------|-------------------|-----------|-----------|--------|-------------|
| NA12155  | chr2_25245276_C/A | 36        | 7         | DNMT3A | stop_gained |

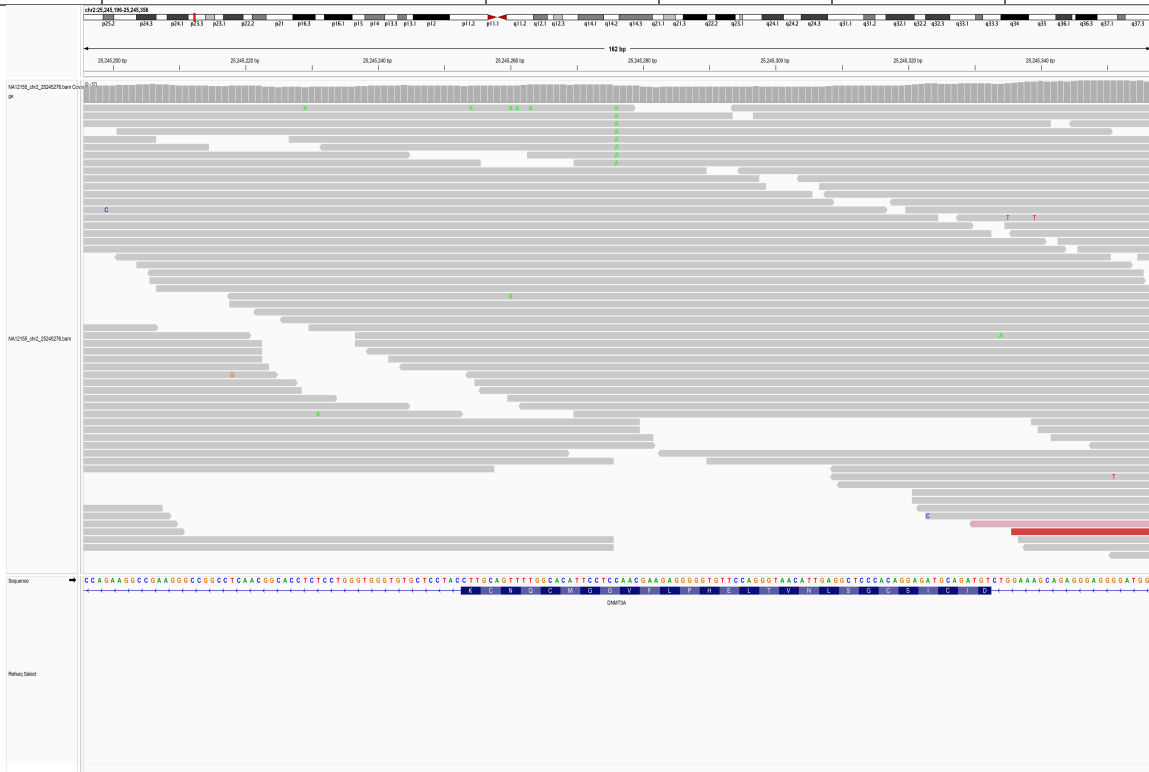

6.18. chr2\_25247160\_T/C

| SampleID | Variants (GRCh38) | Ref_depth | Alt_depth | Gene   | Consequence             |
|----------|-------------------|-----------|-----------|--------|-------------------------|
| NA19007  | chr2_25247160_T/C | 30        | 6         | DNMT3A | splice_acceptor_variant |

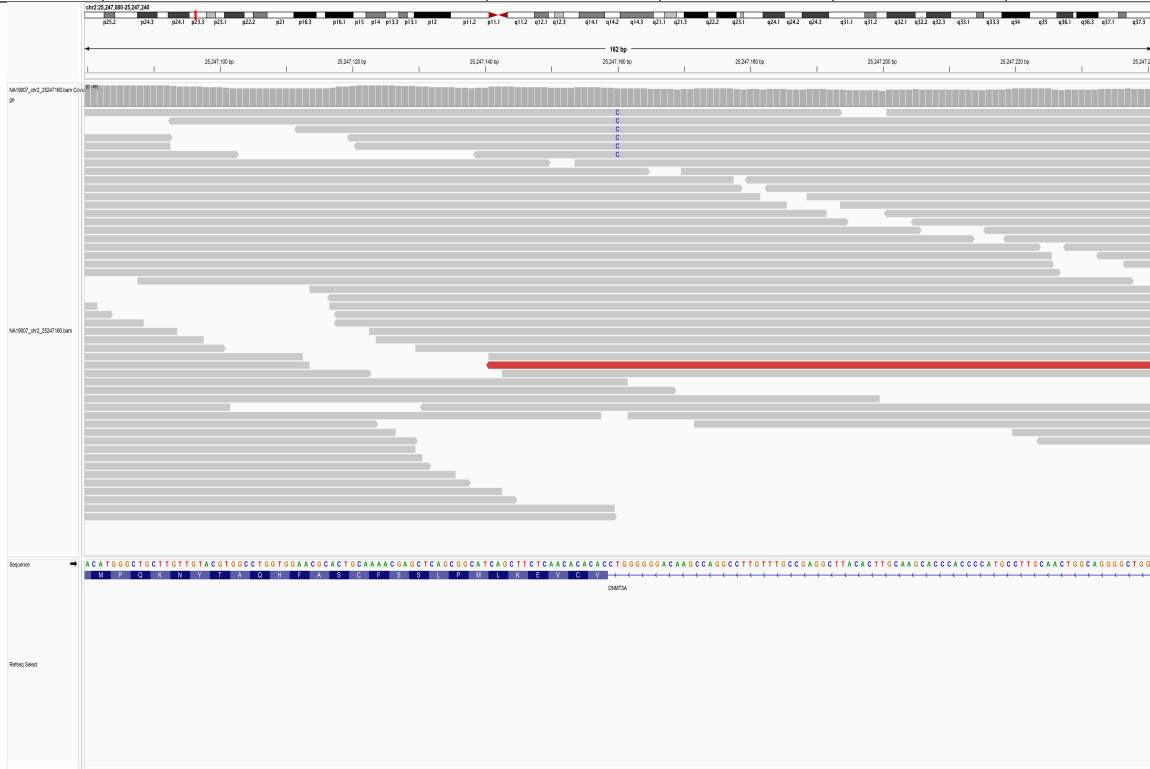

6.19. chr2\_25241617\_C/T

| SampleID | Variants (GRCh38) | Ref_depth | Alt_depth | Gene   | Consequence      |
|----------|-------------------|-----------|-----------|--------|------------------|
| HG03096  | chr2_25241617_C/T | 29        | 3         | DNMT3A | missense_variant |

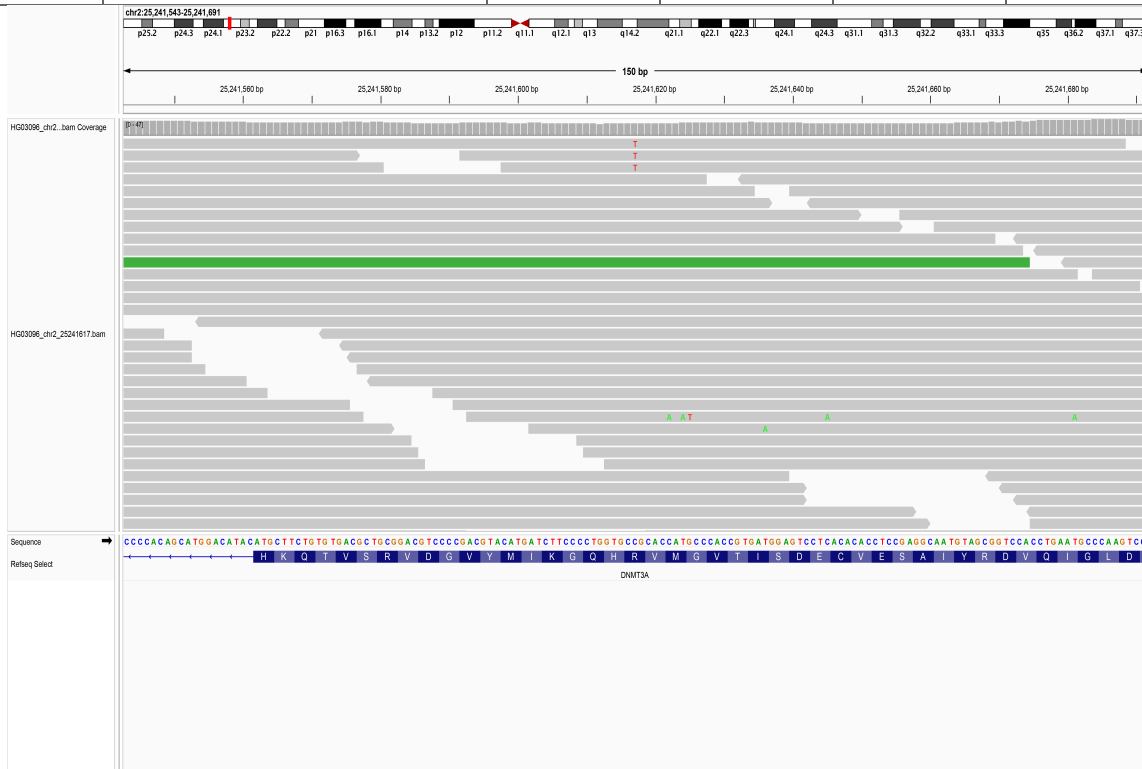

## 7. GNA13

### 7.1. chr17\_65014600\_C/T

| SampleID | Variants (GRCh38)  | Ref_depth | Alt_depth | Gene  | Consequence      |
|----------|--------------------|-----------|-----------|-------|------------------|
| HG00736  | chr17_65014600_C/T | 27        | 4         | GNA13 | missense_variant |

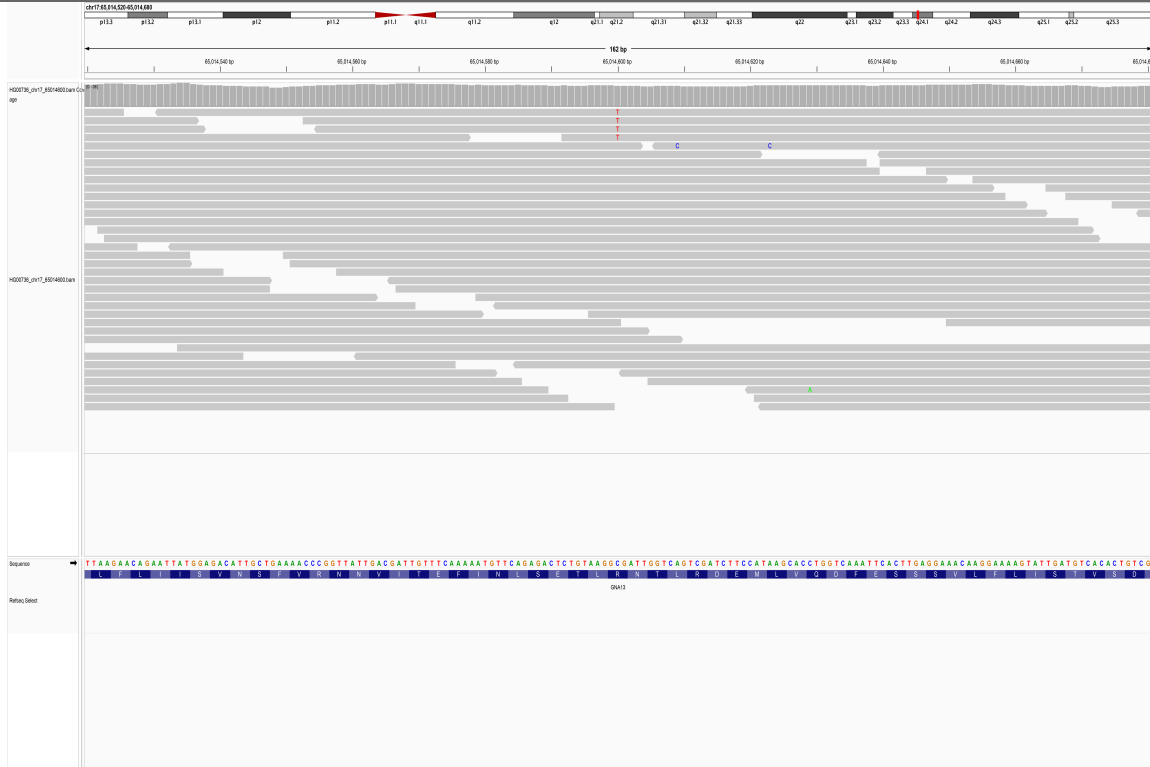



## 9. KMT2D

### 9.1. chr12\_49037395\_G/A

| SampleID | Variants (GRCh38)  | Ref_depth | Alt_depth | Gene         | Consequence |
|----------|--------------------|-----------|-----------|--------------|-------------|
| HG00613  | chr12_49037395_G/A | 31        | 4         | <i>KMT2D</i> | stop_gained |

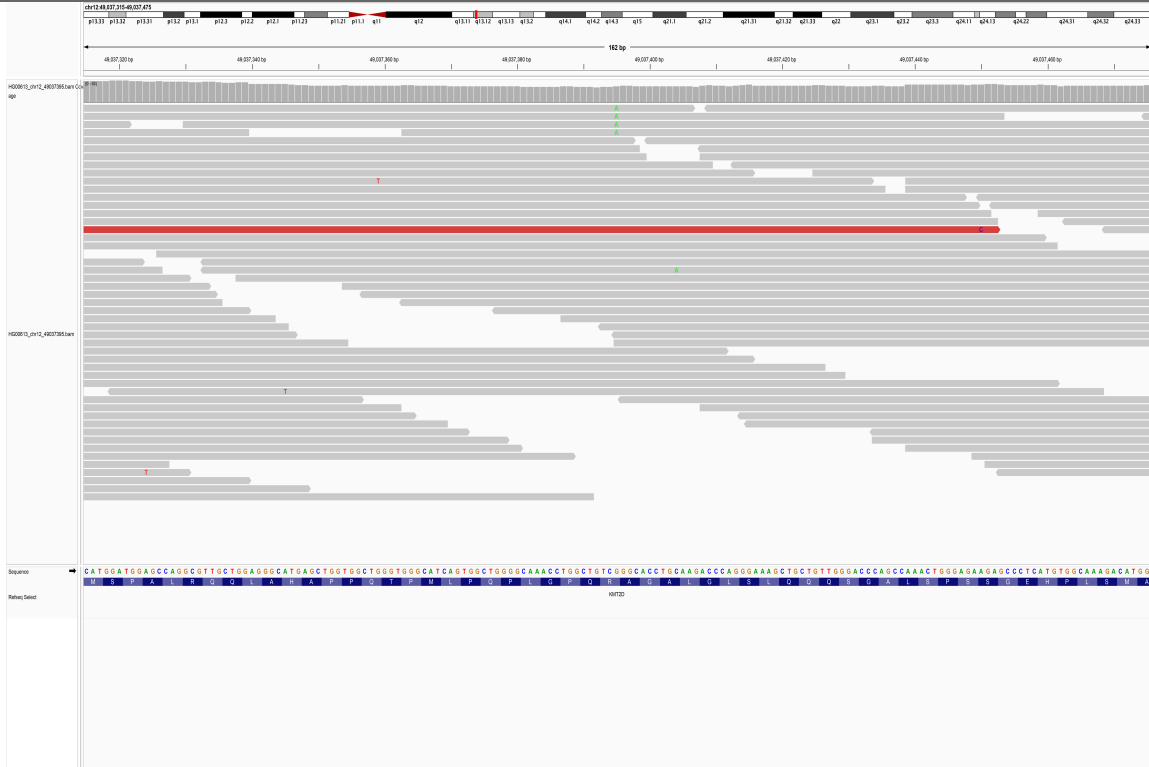

### 9.2. chr12\_49037173\_G/A

| SampleID | Variants (GRCh38)  | Ref_depth | Alt_depth | Gene         | Consequence |
|----------|--------------------|-----------|-----------|--------------|-------------|
| HG01771  | chr12_49037173_G/A | 40        | 4         | <i>KMT2D</i> | stop_gained |

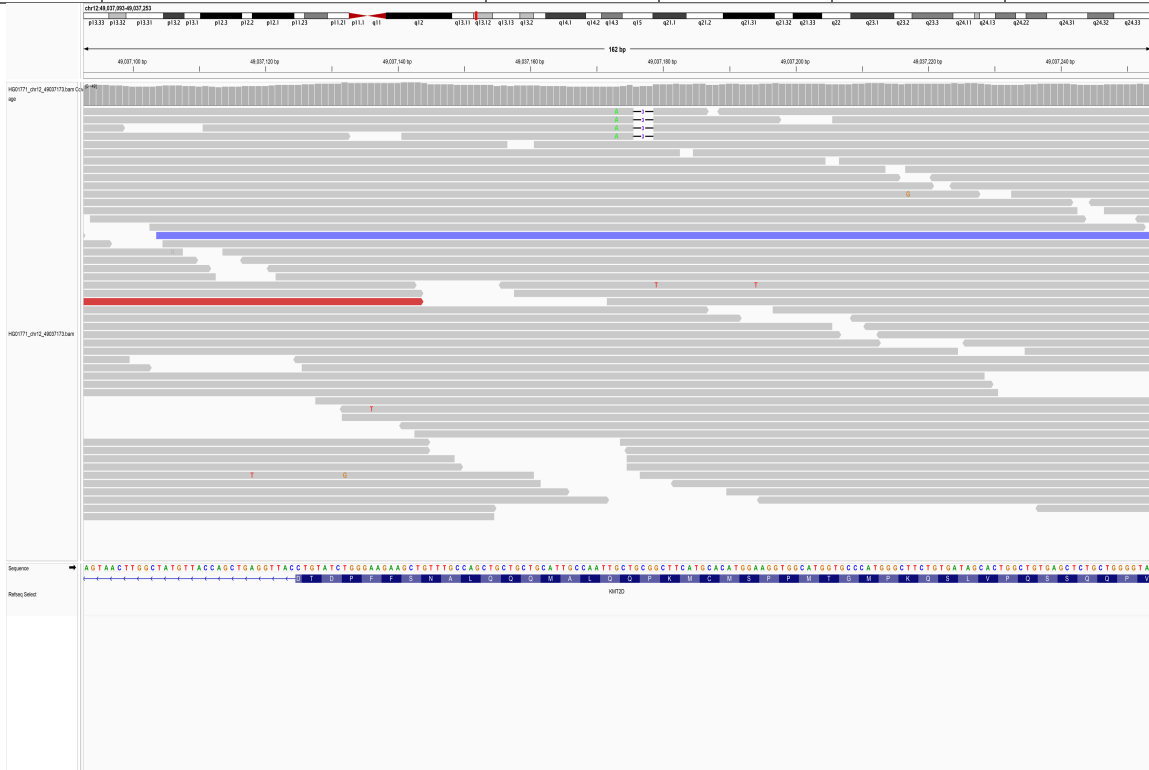

### 9.3. chr12\_49041148\_G/A

| SampleID | Variants (GRCh38)  | Ref_depth | Alt_depth | Gene         | Consequence |
|----------|--------------------|-----------|-----------|--------------|-------------|
| HG01863  | chr12_49041148_G/A | 35        | 8         | <i>KMT2D</i> | stop_gained |

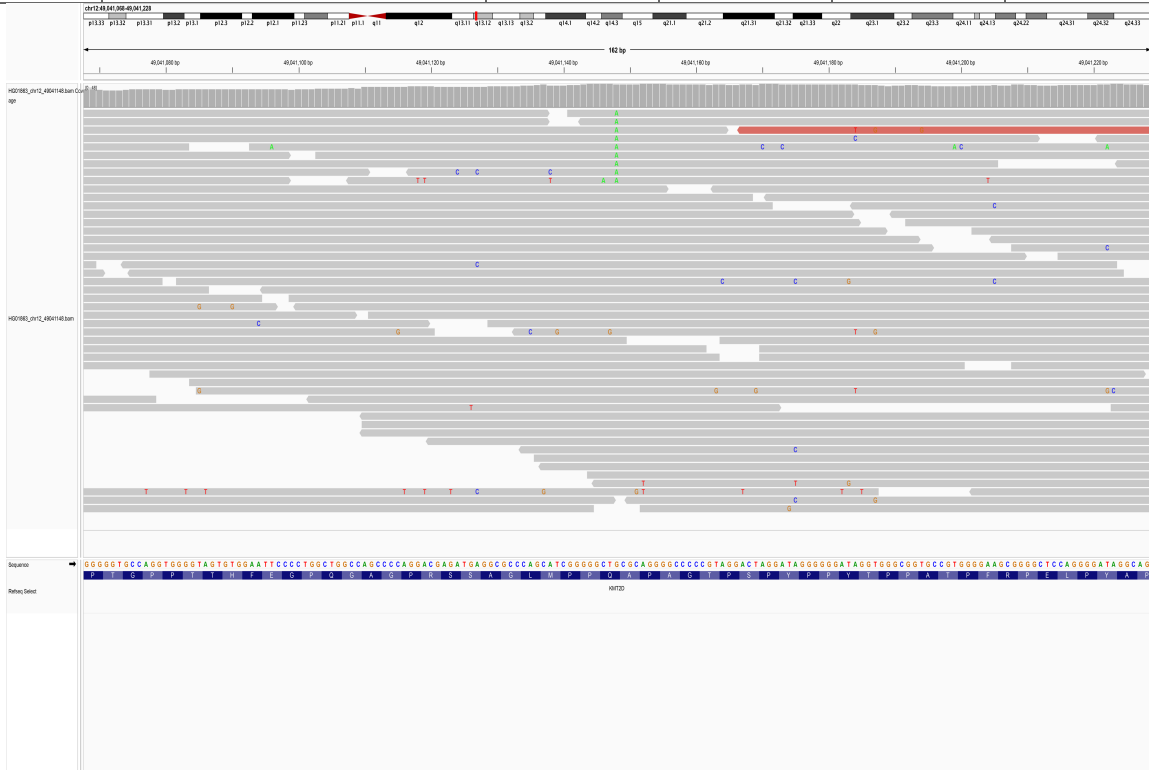



9.5. chr12\_49039611\_G/A

| SampleID | Variants (GRCh38)  | Ref_depth | Alt_depth | Gene         | Consequence |
|----------|--------------------|-----------|-----------|--------------|-------------|
| NA18612  | chr12_49039611_G/A | 58        | 6         | <i>KMT2D</i> | stop_gained |

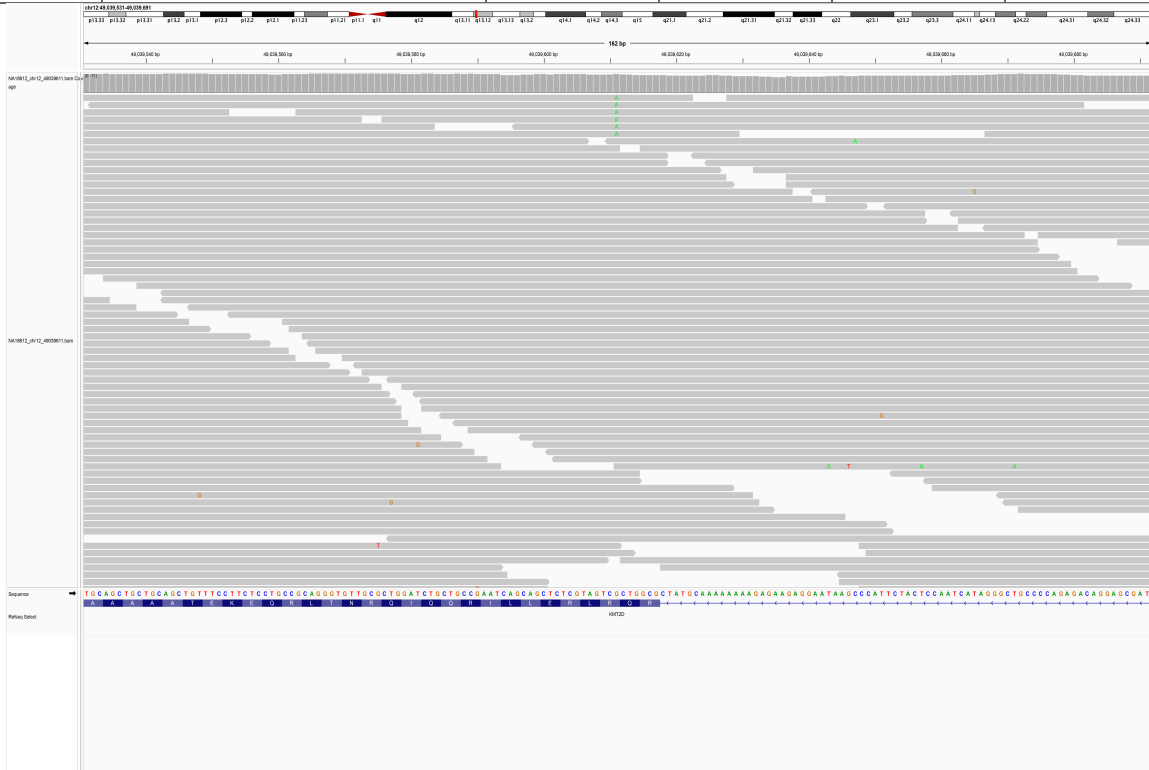

9.6. chr12\_49052175\_AG/-

| SampleID | Variants (GRCh38)   | Ref_depth | Alt_depth | Gene         | Consequence        |
|----------|---------------------|-----------|-----------|--------------|--------------------|
| NA20515  | chr12_49052175_AG/- | 32        | 7         | <i>KMT2D</i> | frameshift_variant |

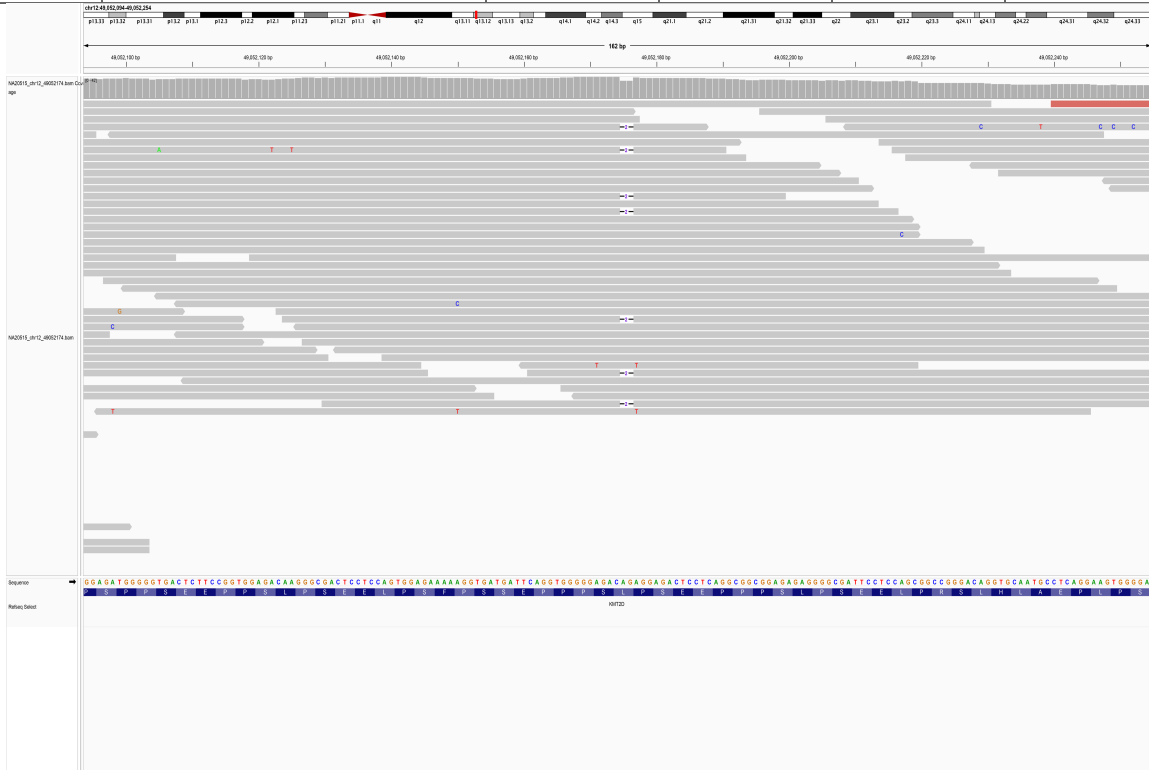

## 10. MPL

### 10.1. chr1\_43352251\_A/T

| SampleID | Variants (GRCh38) | Ref_depth | Alt_depth | Gene | Consequence      |
|----------|-------------------|-----------|-----------|------|------------------|
| NA18976  | chr1_43352251_A/T | 26        | 10        | MPL  | missense_variant |

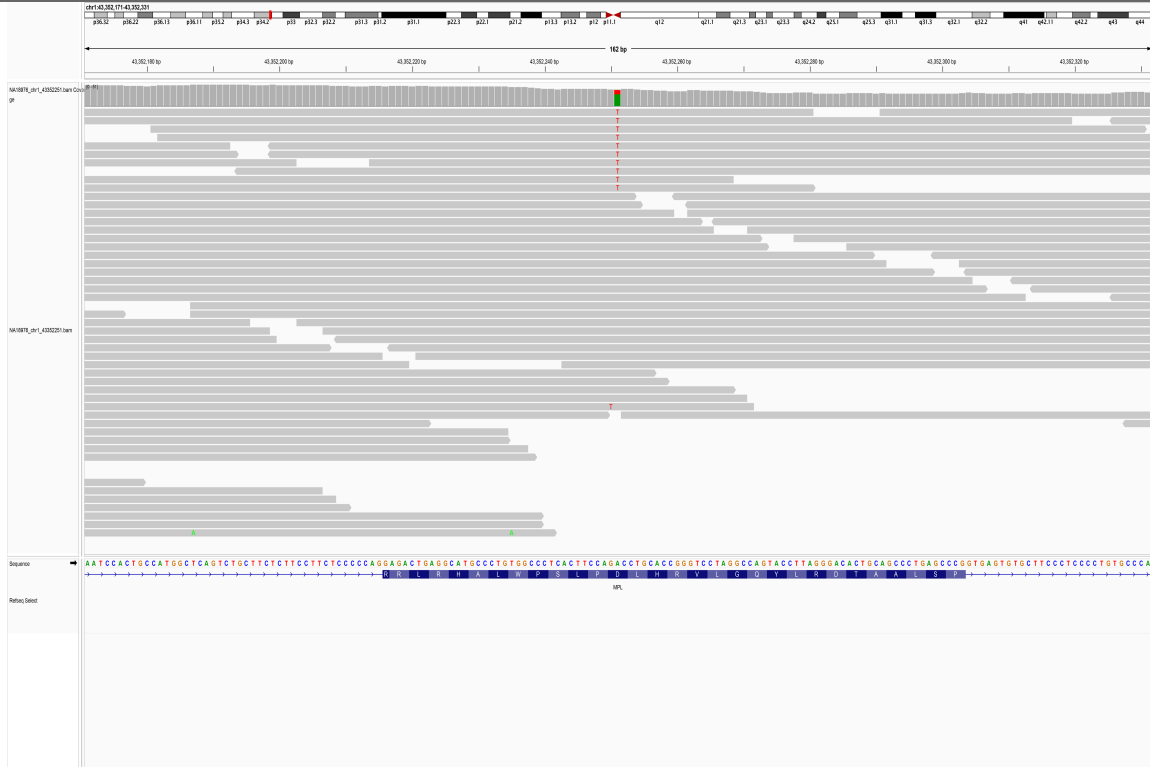

# 11. NF1

## 11.1. chr17\_31226460\_-/C

| SampleID | Variants (GRCh38)  | Ref_depth | Alt_depth | Gene | Consequence        |
|----------|--------------------|-----------|-----------|------|--------------------|
| HG00159  | chr17_31226460_-/C | 26        | 9         | NF1  | frameshift_variant |

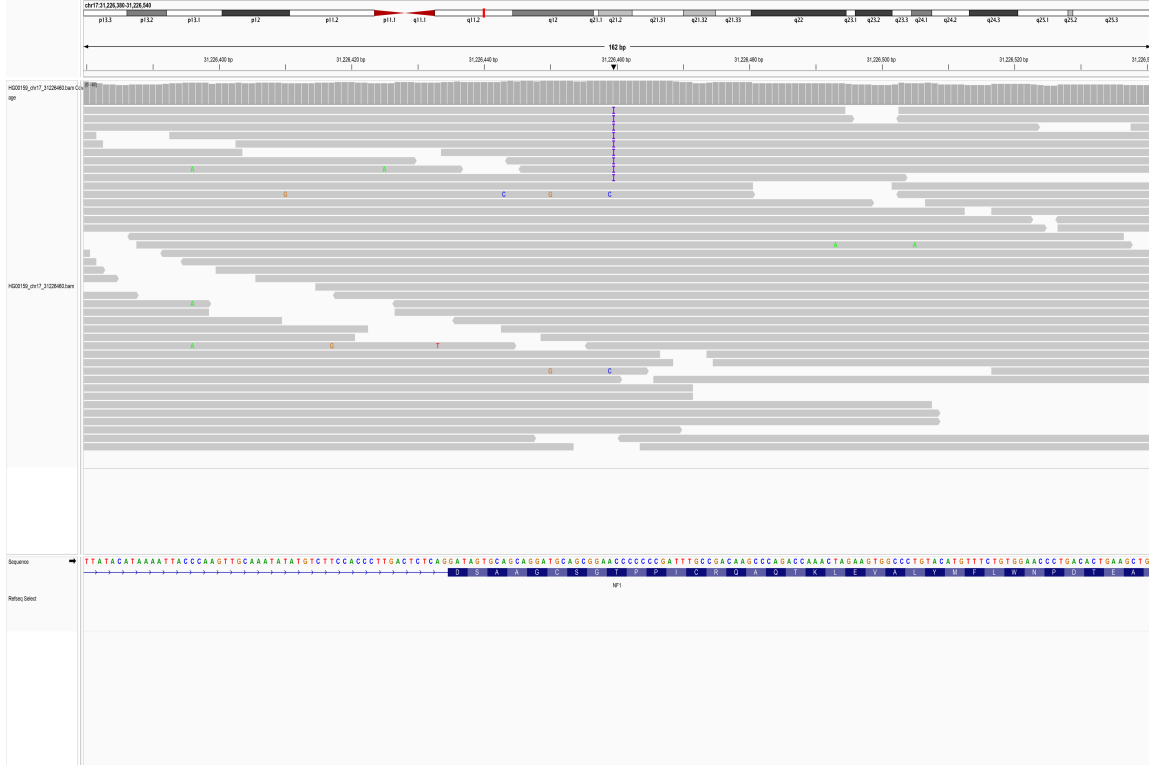

11.2. chr17\_31338743\_AGTCA/-

| SampleID | Variants (GRCh38)      | Ref_depth | Alt_depth | Gene | Consequence        |
|----------|------------------------|-----------|-----------|------|--------------------|
| HG00272  | chr17_31338743_AGTCA/- | 32        | 6         | NF1  | frameshift_variant |

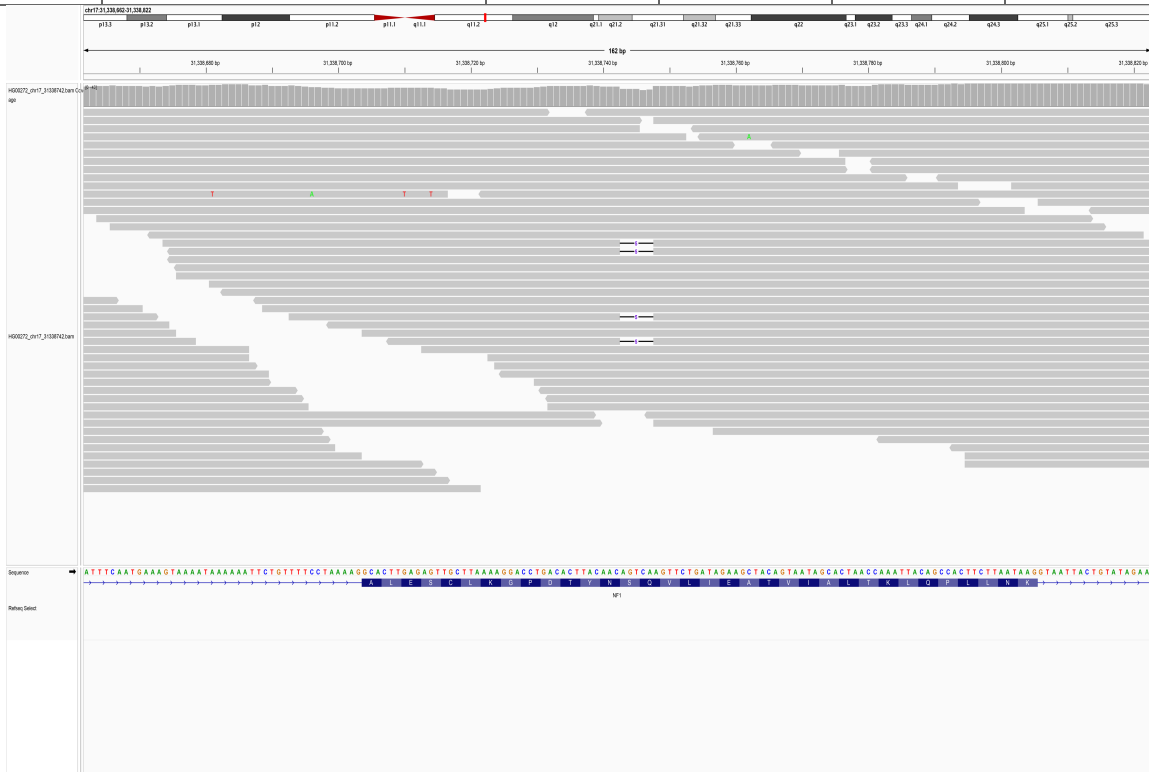

11.3. chr17\_31343098\_-/T

| SampleID | Variants (GRCh38)  | Ref_depth | Alt_depth | Gene | Consequence        |
|----------|--------------------|-----------|-----------|------|--------------------|
| HG01961  | chr17_31343098_-/T | 22        | 3         | NF1  | frameshift_variant |

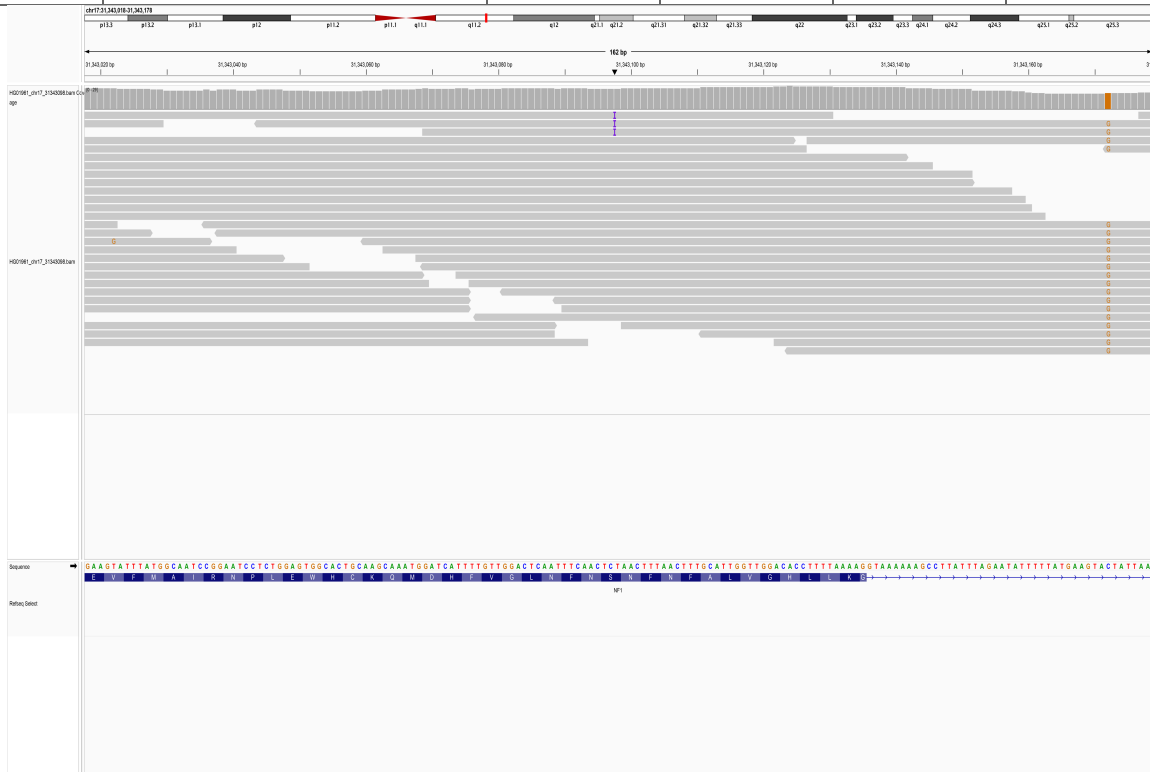

## 12. NRAS

### 12.1. chr1\_114716126\_C/T

| SampleID | Variants (GRCh38)  | Ref_depth | Alt_depth | Gene | Consequence      |
|----------|--------------------|-----------|-----------|------|------------------|
| HG00244  | chr1_114716126_C/T | 39        | 6         | NRAS | missense_variant |

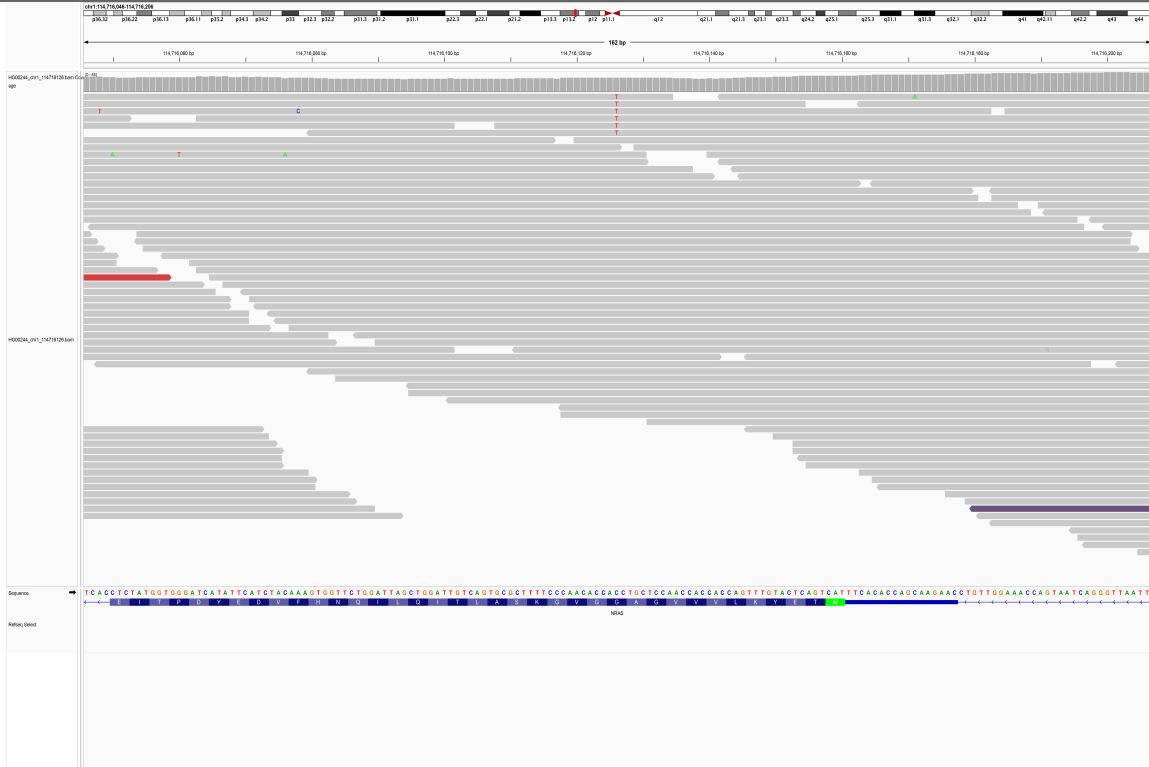

### 13. PHF6

#### 13.1. chrX\_134378107\_G/A

| SampleID | Variants (GRCh38)  | Ref_depth | Alt_depth | Gene | Consequence          |
|----------|--------------------|-----------|-----------|------|----------------------|
| HG02778  | chrX_134378107_G/A | 23        | 10        | PHF6 | splice_donor_variant |

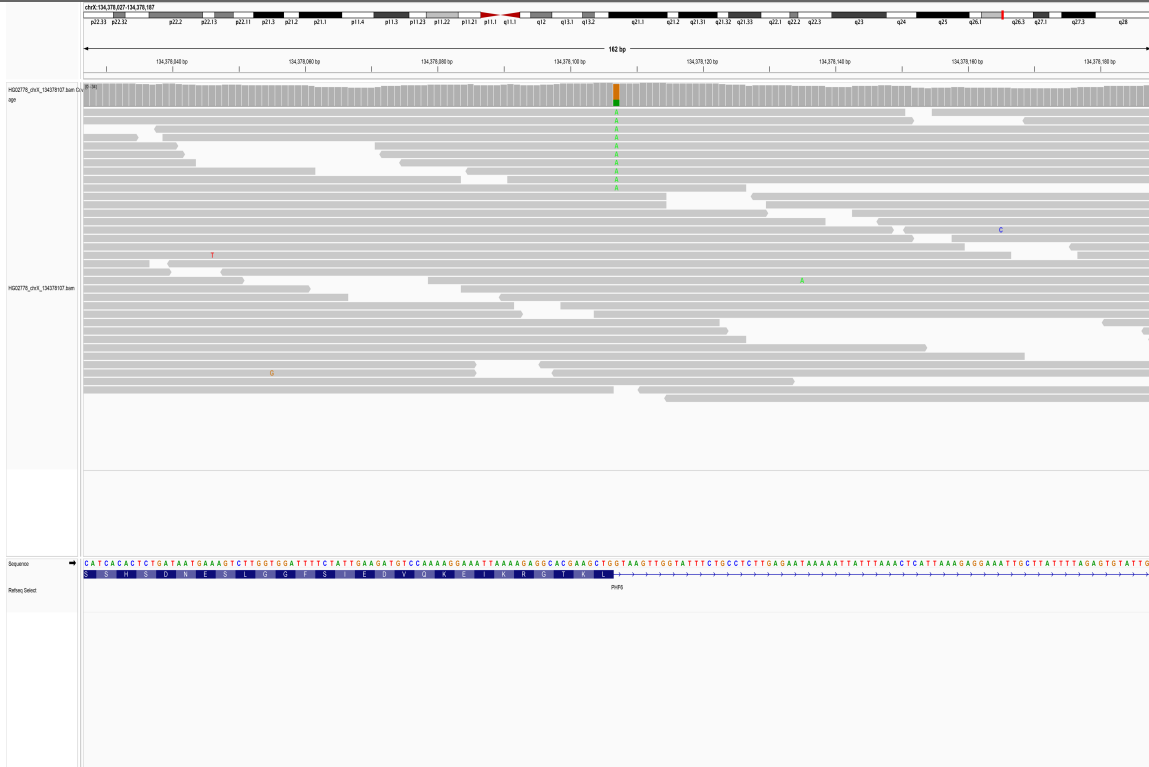

## 14. PPM1D

### 14.1. chr17\_60663270\_T/-

| SampleID | Variants (GRCh38)  | Ref_depth | Alt_depth | Gene  | Consequence        |
|----------|--------------------|-----------|-----------|-------|--------------------|
| HG01200  | chr17_60663270_T/- | 27        | 6         | PPM1D | frameshift_variant |

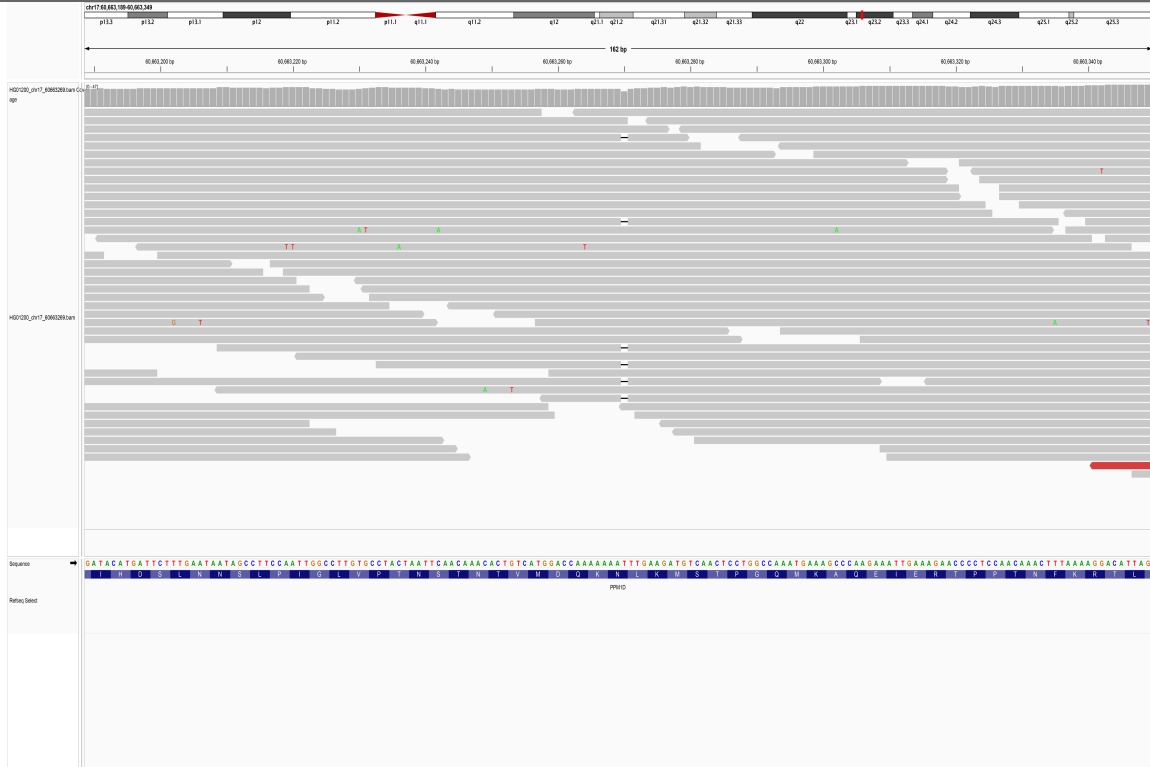

14.2. chr17\_60663320\_-/C

| SampleID | Variants (GRCh38)  | Ref_depth | Alt_depth | Gene  | Consequence        |
|----------|--------------------|-----------|-----------|-------|--------------------|
| HG02970  | chr17_60663320_-/C | 21        | 6         | PPM1D | frameshift_variant |

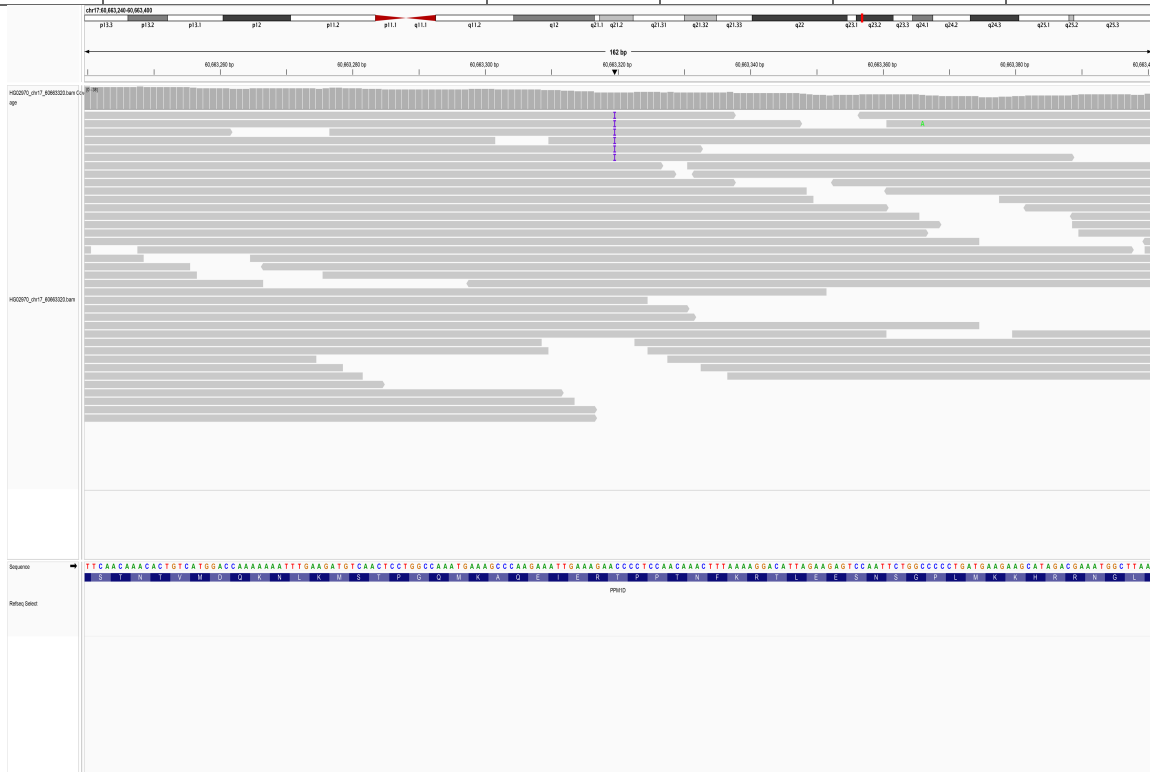

14.3. chr17\_60663313\_G/T

| SampleID | Variants (GRCh38)  | Ref_depth | Alt_depth | Gene  | Consequence |
|----------|--------------------|-----------|-----------|-------|-------------|
| HG03615  | chr17_60663313_G/T | 18        | 5         | PPM1D | stop_gained |

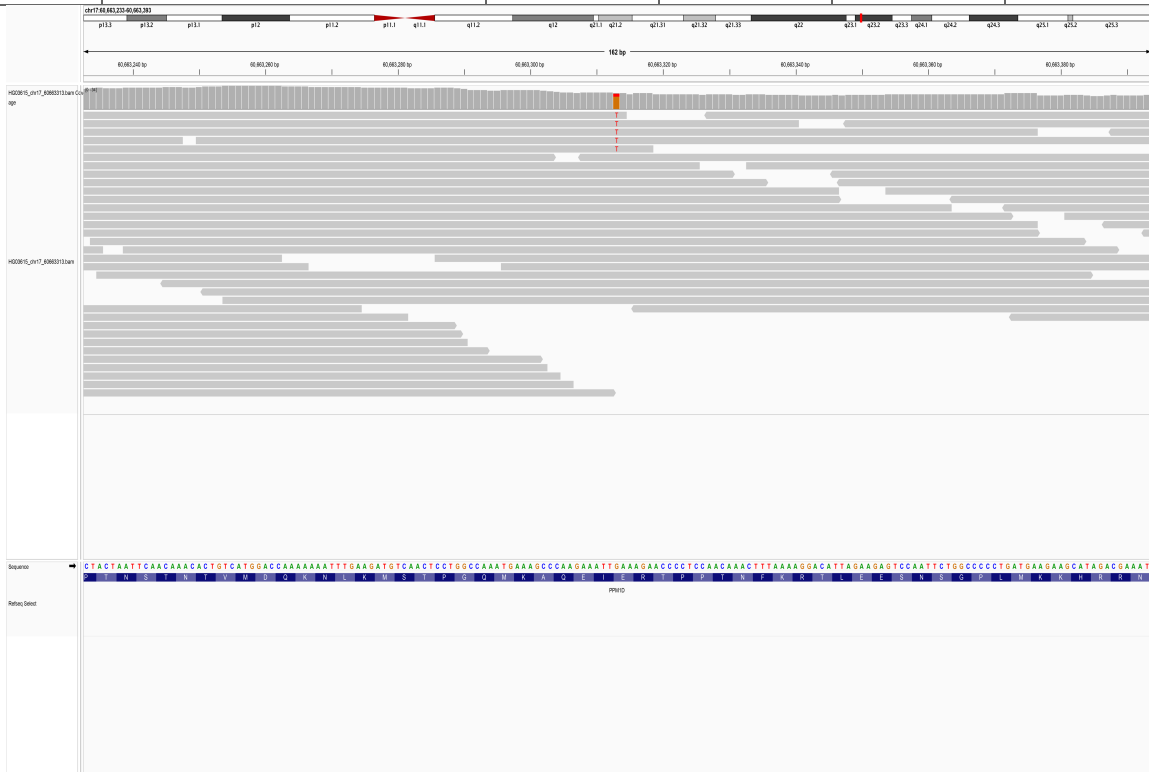

14.4. chr17\_60662995\_T/A

| SampleID | Variants (GRCh38)  | Ref_depth | Alt_depth | Gene  | Consequence      |
|----------|--------------------|-----------|-----------|-------|------------------|
| HG04022  | chr17_60662995_T/A | 31        | 7         | PPM1D | missense_variant |

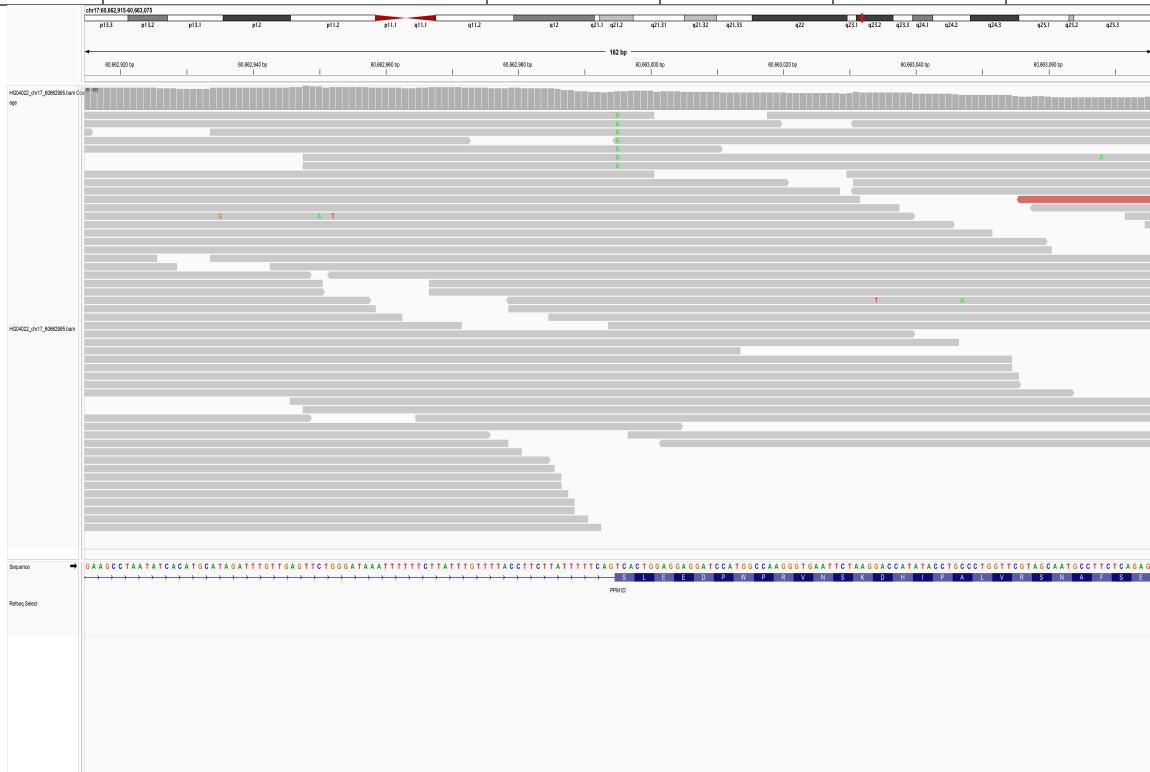

14.5. chr17\_60663106\_C/T

| SampleID | Variants (GRCh38)  | Ref_depth | Alt_depth | Gene  | Consequence |
|----------|--------------------|-----------|-----------|-------|-------------|
| NA18917  | chr17_60663106_C/T | 43        | 3         | PPM1D | stop_gained |

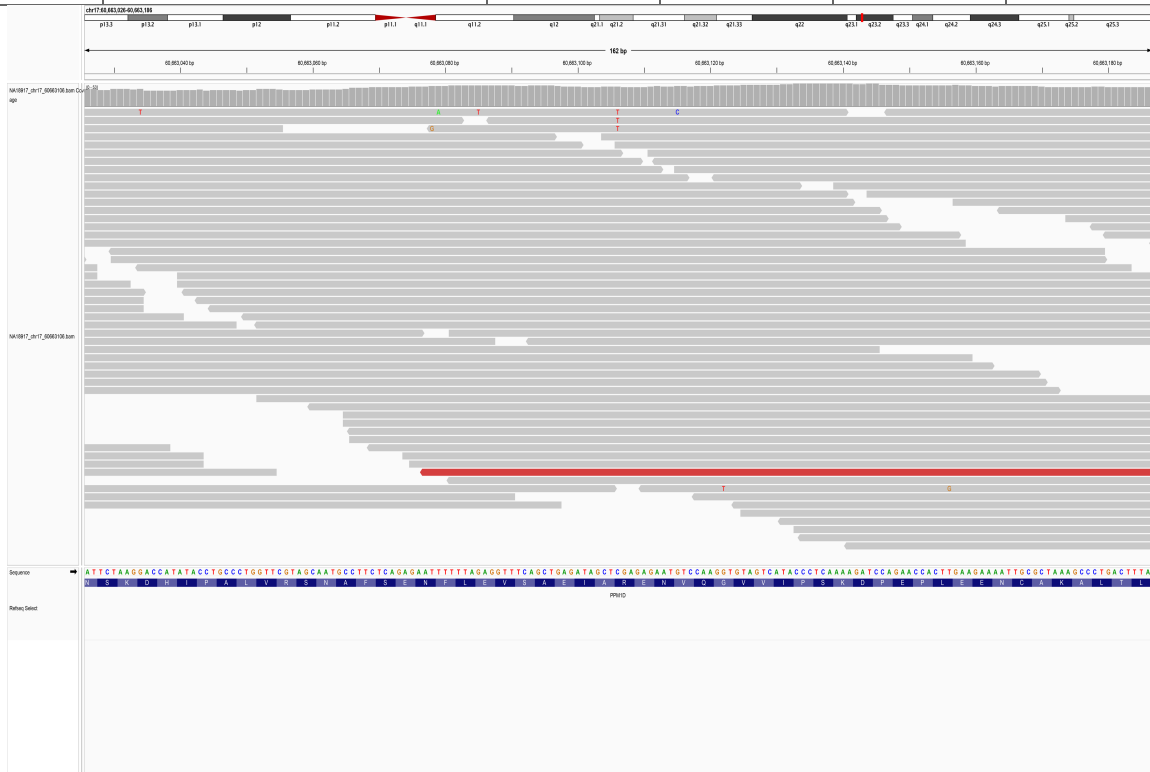

## 15. PRPF40B

### 15.1. chr12\_49643754\_T/G

| SampleID | Variants (GRCh38)  | Ref_depth | Alt_depth | Gene    | Consequence          |
|----------|--------------------|-----------|-----------|---------|----------------------|
| HG00640  | chr12_49643754_T/G | 27        | 6         | PRPF40B | splice_donor_variant |

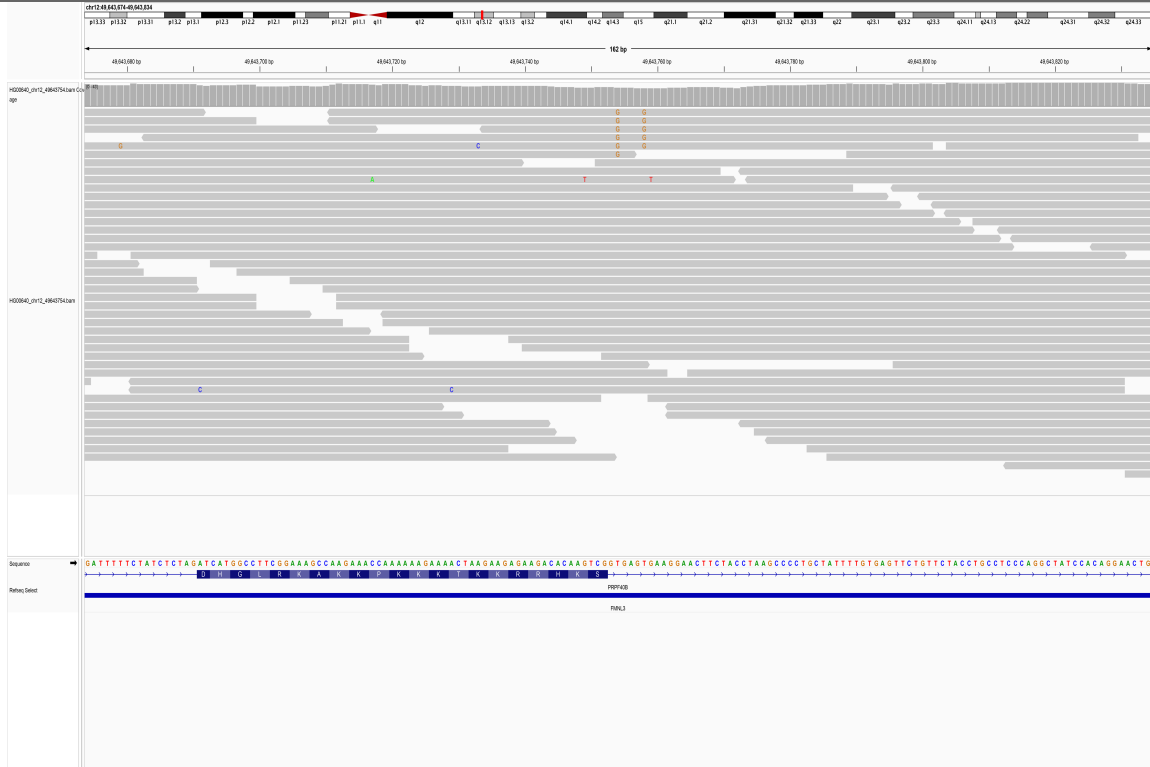

## 16. PTEN

### 16.1. chr10\_87933035\_C/A

| SampleID | Variants (GRCh38)  | Ref_depth | Alt_depth | Gene | Consequence      |
|----------|--------------------|-----------|-----------|------|------------------|
| NA20899  | chr10_87933035_C/A | 32        | 4         | PTEN | missense_variant |

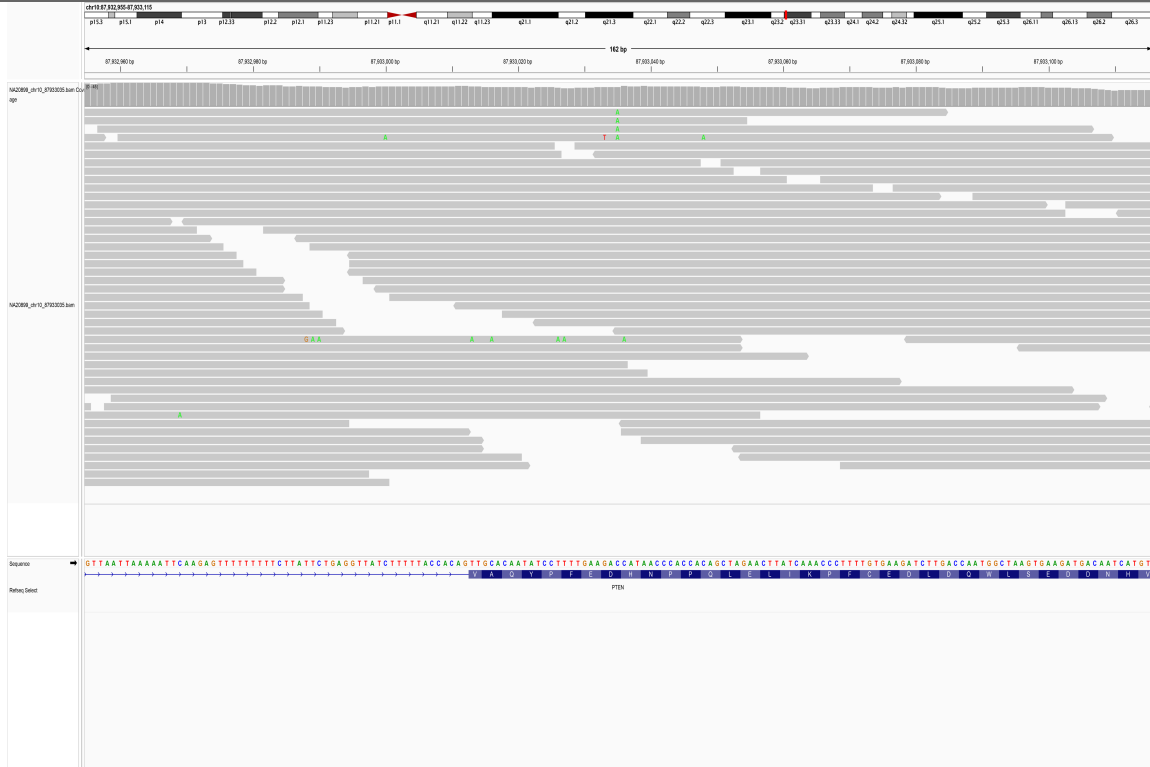



## 18. RUNX1

### 18.1. chr21\_34834466\_-/GG

| SampleID | Variants (GRCh38)   | Ref_depth | Alt_depth | Gene         | Consequence        |
|----------|---------------------|-----------|-----------|--------------|--------------------|
| HG01162  | chr21_34834466_-/GG | 40        | 3         | <i>RUNX1</i> | frameshift_variant |

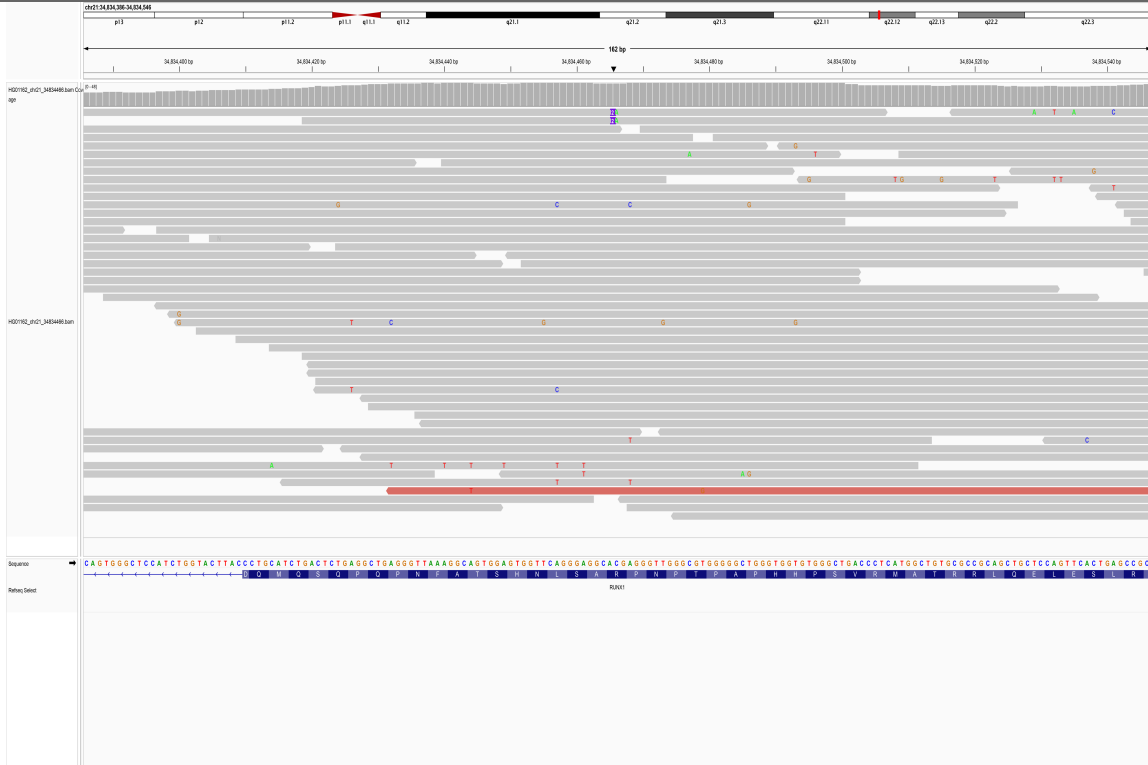

## 19. SETD2

### 19.1. chr3\_47123018\_G/A

| SampleID | Variants (GRCh38) | Ref_depth | Alt_depth | Gene  | Consequence |
|----------|-------------------|-----------|-----------|-------|-------------|
| HG00158  | chr3_47123018_G/A | 40        | 8         | SETD2 | stop_gained |

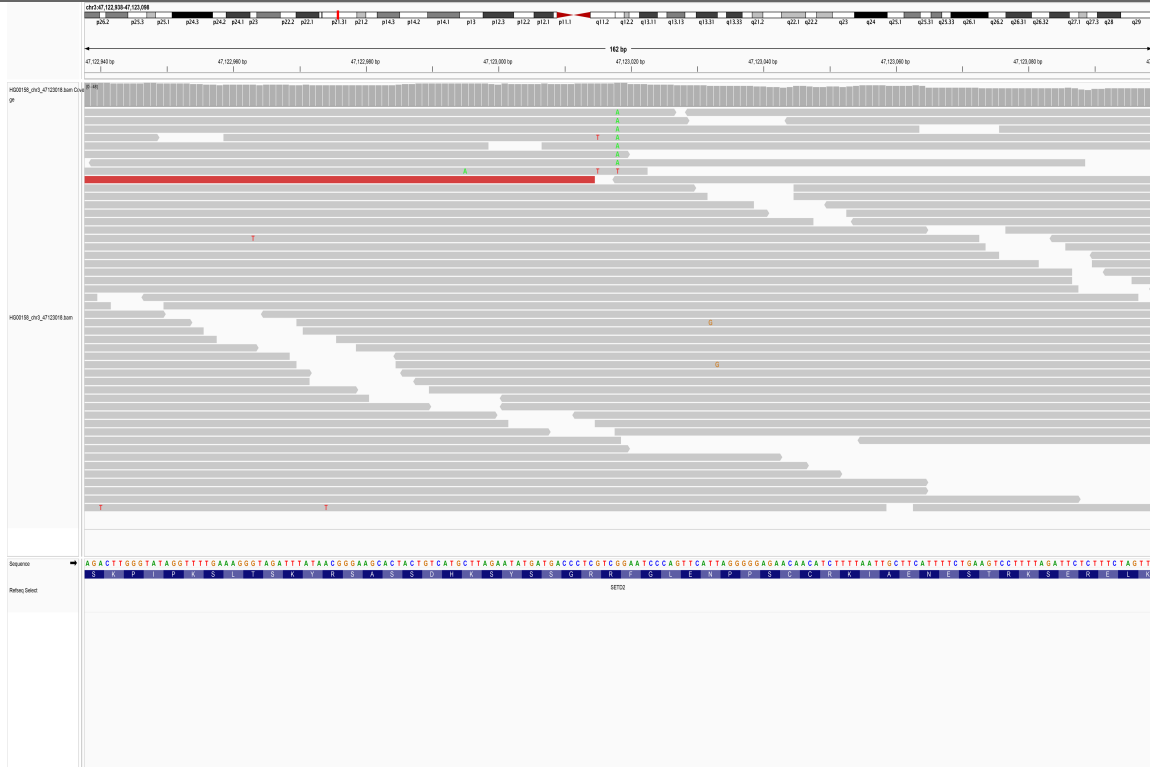



19.3. chr3\_47122588\_A/T

| SampleID | Variants (GRCh38) | Ref_depth | Alt_depth | Gene  | Consequence |
|----------|-------------------|-----------|-----------|-------|-------------|
| HG01398  | chr3_47122588_A/T | 40        | 13        | SETD2 | stop_gained |

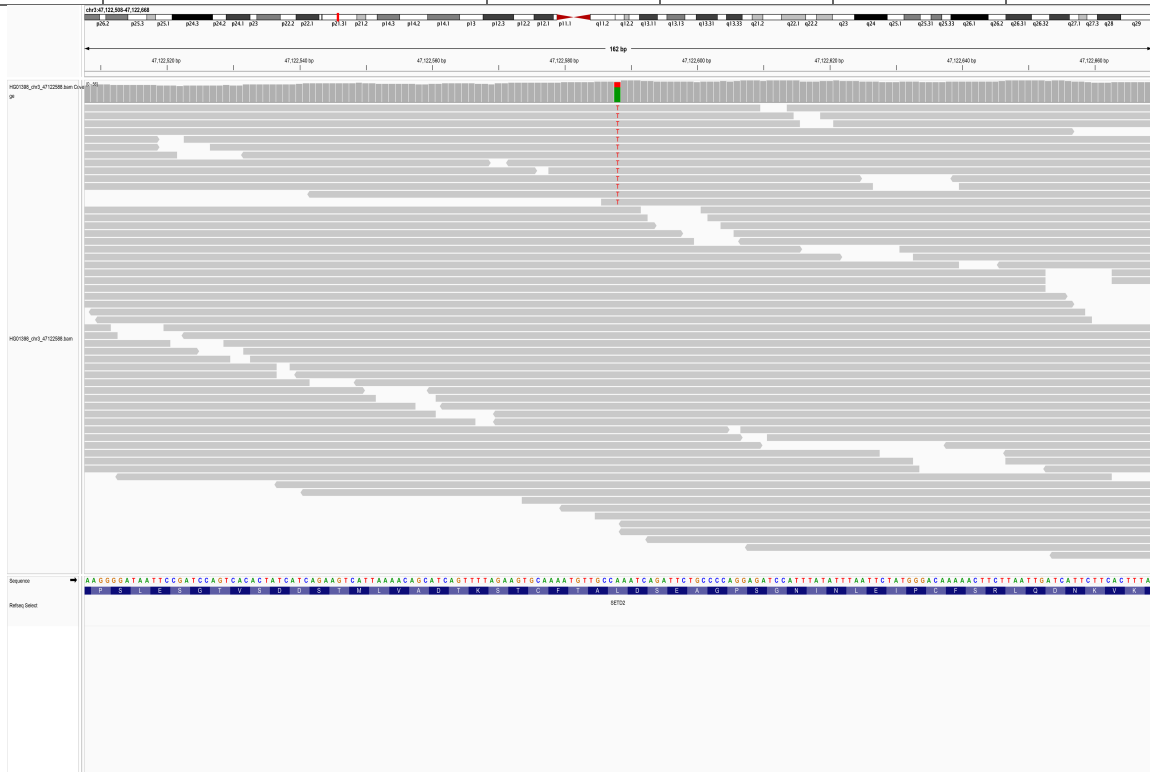

19.4. chr3\_47113999\_G/-

| SampleID | Variants (GRCh38) | Ref_depth | Alt_depth | Gene  | Consequence        |
|----------|-------------------|-----------|-----------|-------|--------------------|
| HG01501  | chr3_47113999_G/- | 38        | 6         | SETD2 | frameshift_variant |

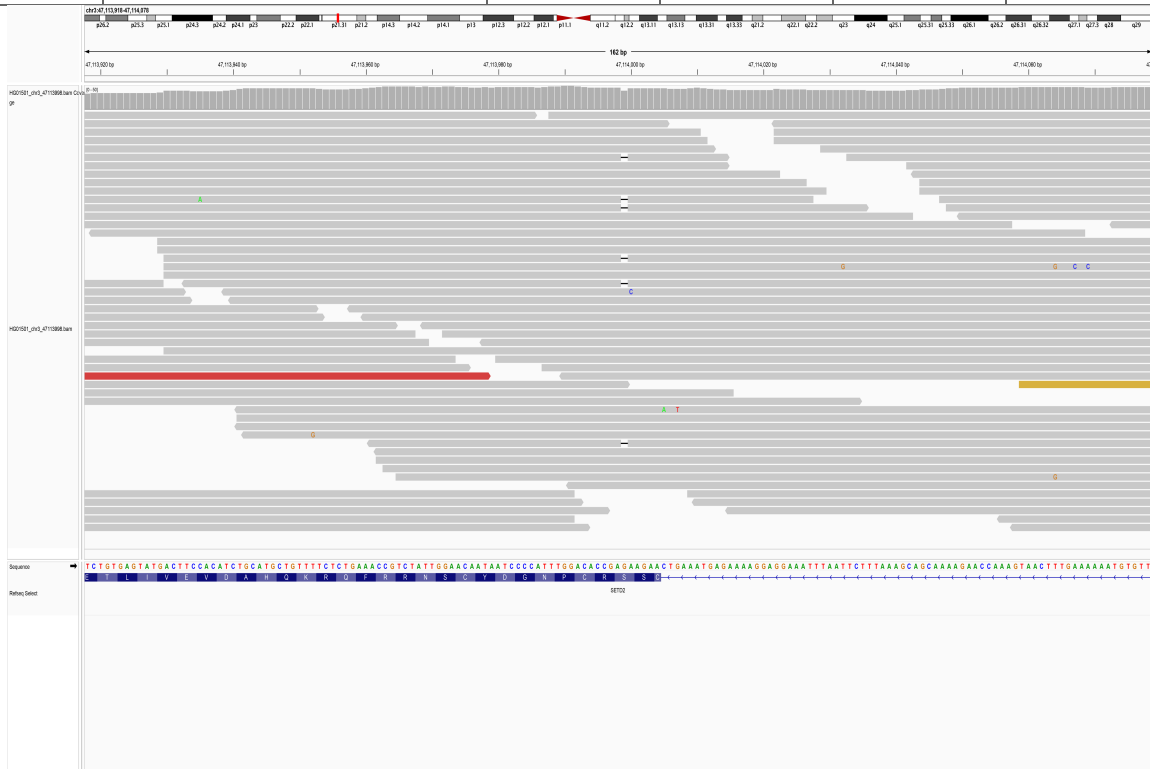

19.5. chr3\_47120294\_AGGGCCCAACCAGTGCTGAACCT/-

| SampleID | Variants (GRCh38)                       | Ref_depth | Alt_depth | Gene  | Consequence        |
|----------|-----------------------------------------|-----------|-----------|-------|--------------------|
| HG01700  | chr3_47120294_AGGGCCCAACCAGTGCTGAACCT/- | 39        | 3         | SETD2 | frameshift_variant |

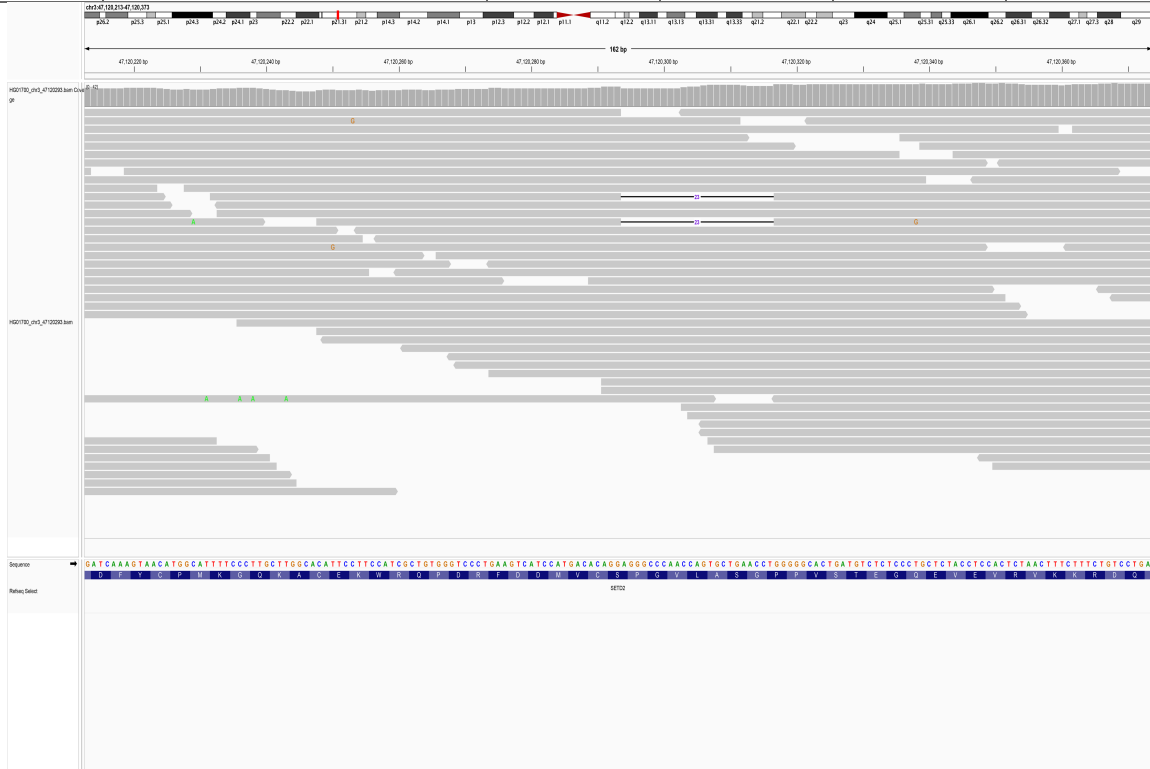

19.6. chr3\_47123534\_G/A

| SampleID | Variants (GRCh38) | Ref_depth | Alt_depth | Gene  | Consequence |
|----------|-------------------|-----------|-----------|-------|-------------|
| NA11830  | chr3_47123534_G/A | 29        | 6         | SETD2 | stop_gained |

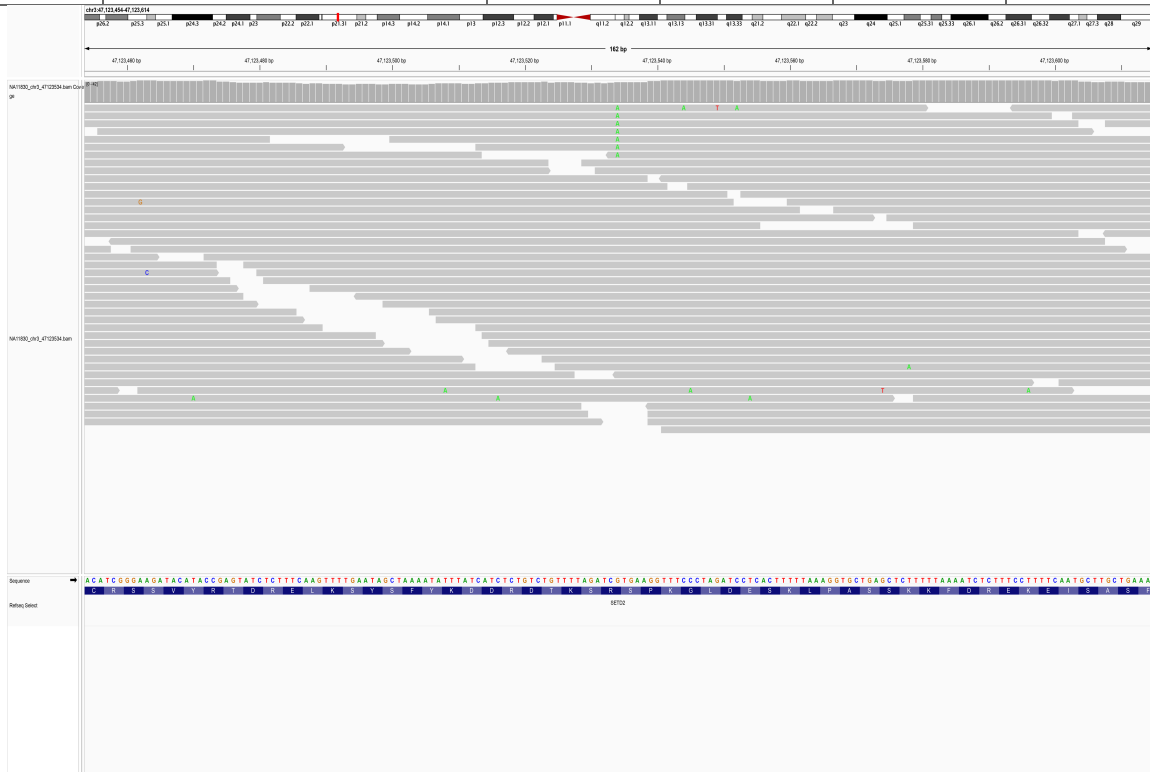

19.7. chr3\_47113934\_C/A

| SampleID | Variants (GRCh38) | Ref_depth | Alt_depth | Gene  | Consequence |
|----------|-------------------|-----------|-----------|-------|-------------|
| NA11831  | chr3_47113934_C/A | 30        | 6         | SETD2 | stop_gained |

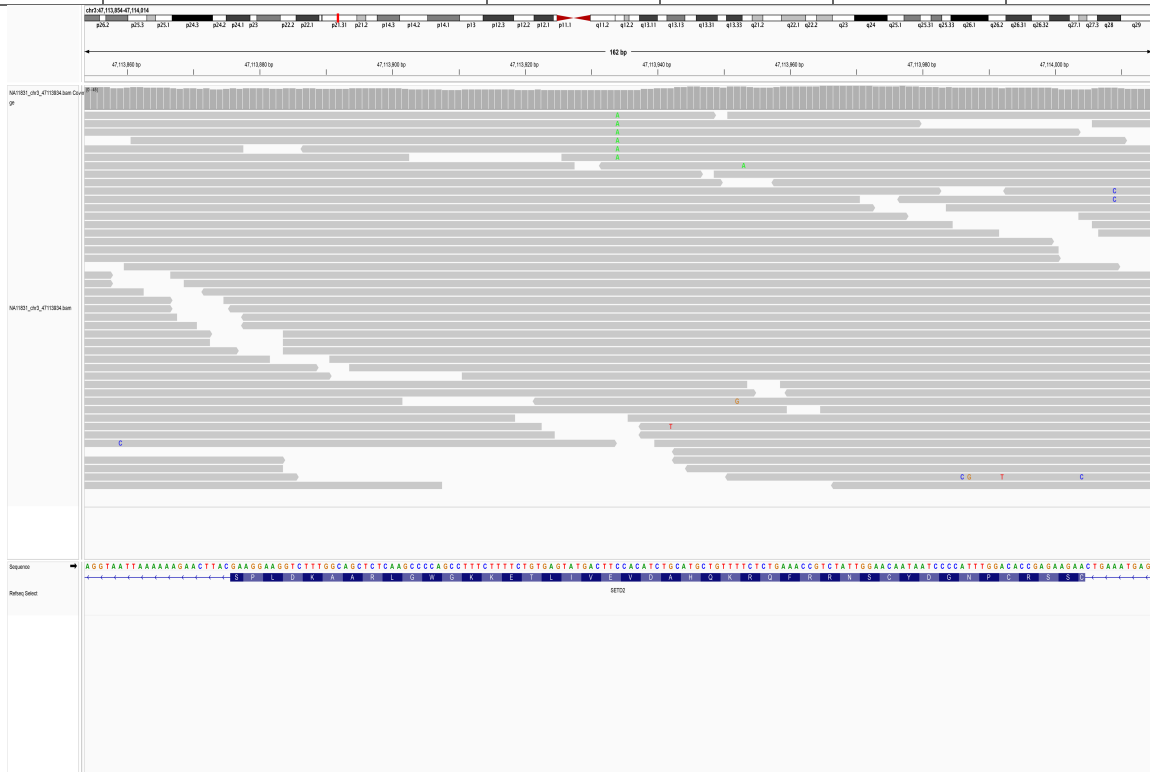

19.8. chr3\_47062227\_G/A

| SampleID | Variants (GRCh38) | Ref_depth | Alt_depth | Gene  | Consequence |
|----------|-------------------|-----------|-----------|-------|-------------|
| NA11894  | chr3_47062227_G/A | 27        | 4         | SETD2 | stop_gained |

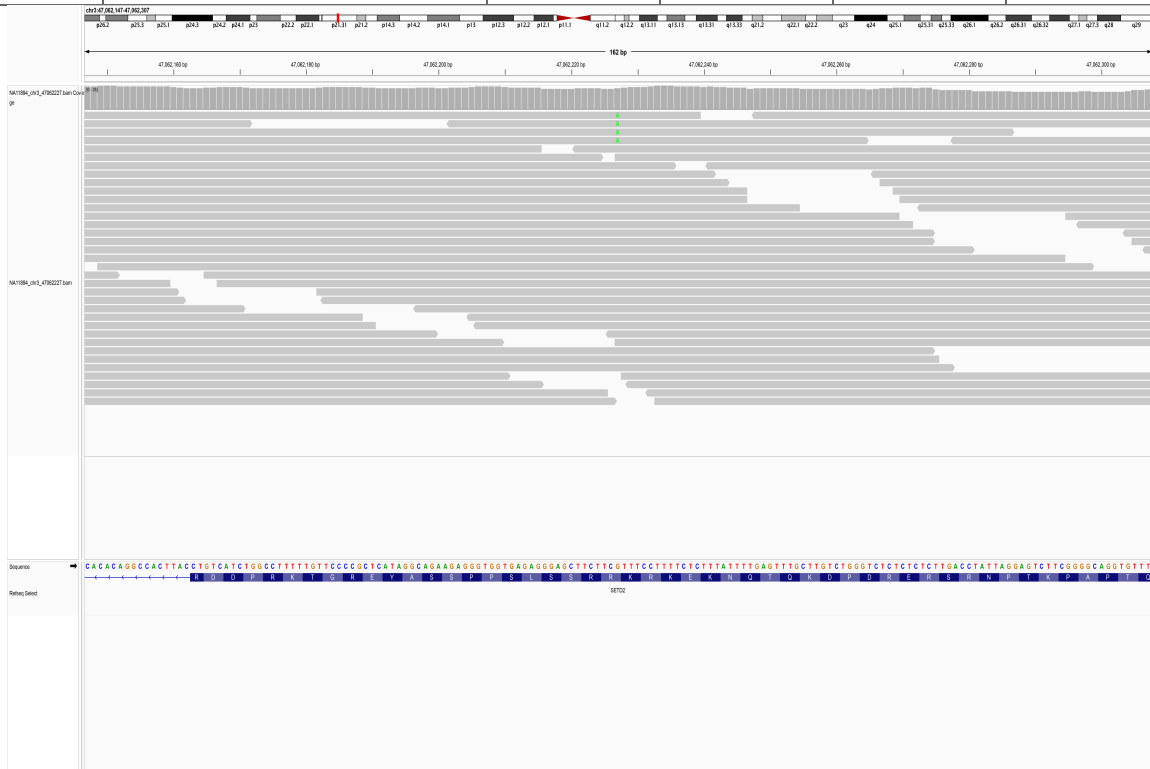



19.10. chr3\_47122102\_G/C

| SampleID | Variants (GRCh38) | Ref_depth | Alt_depth | Gene  | Consequence |
|----------|-------------------|-----------|-----------|-------|-------------|
| NA12287  | chr3_47122102_G/C | 21        | 8         | SETD2 | stop_gained |

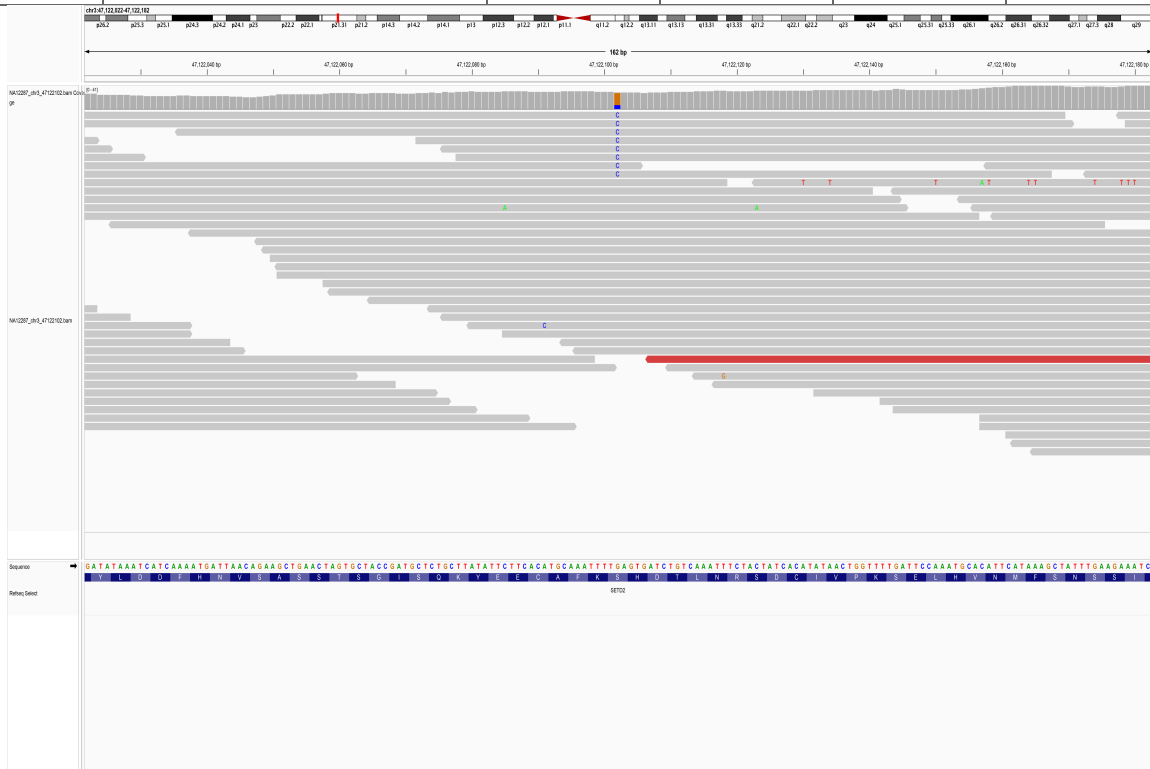

19.11. chr3\_47056886\_G/A

| SampleID | Variants (GRCh38) | Ref_depth | Alt_depth | Gene  | Consequence |
|----------|-------------------|-----------|-----------|-------|-------------|
| NA20808  | chr3_47056886_G/A | 36        | 5         | SETD2 | stop_gained |

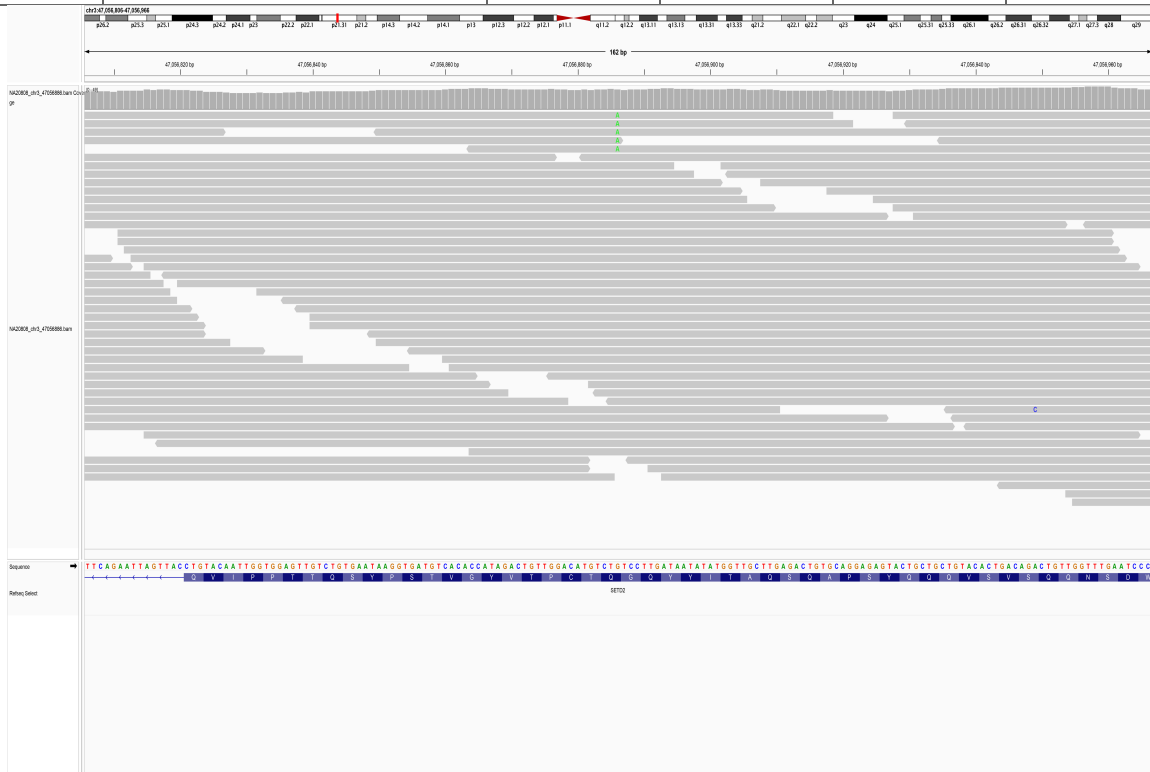

19.12. chr3\_47121944\_AG/-

| SampleID | Variants (GRCh38)  | Ref_depth | Alt_depth | Gene  | Consequence        |
|----------|--------------------|-----------|-----------|-------|--------------------|
| NA20896  | chr3_47121944_AG/- | 36        | 5         | SETD2 | frameshift_variant |

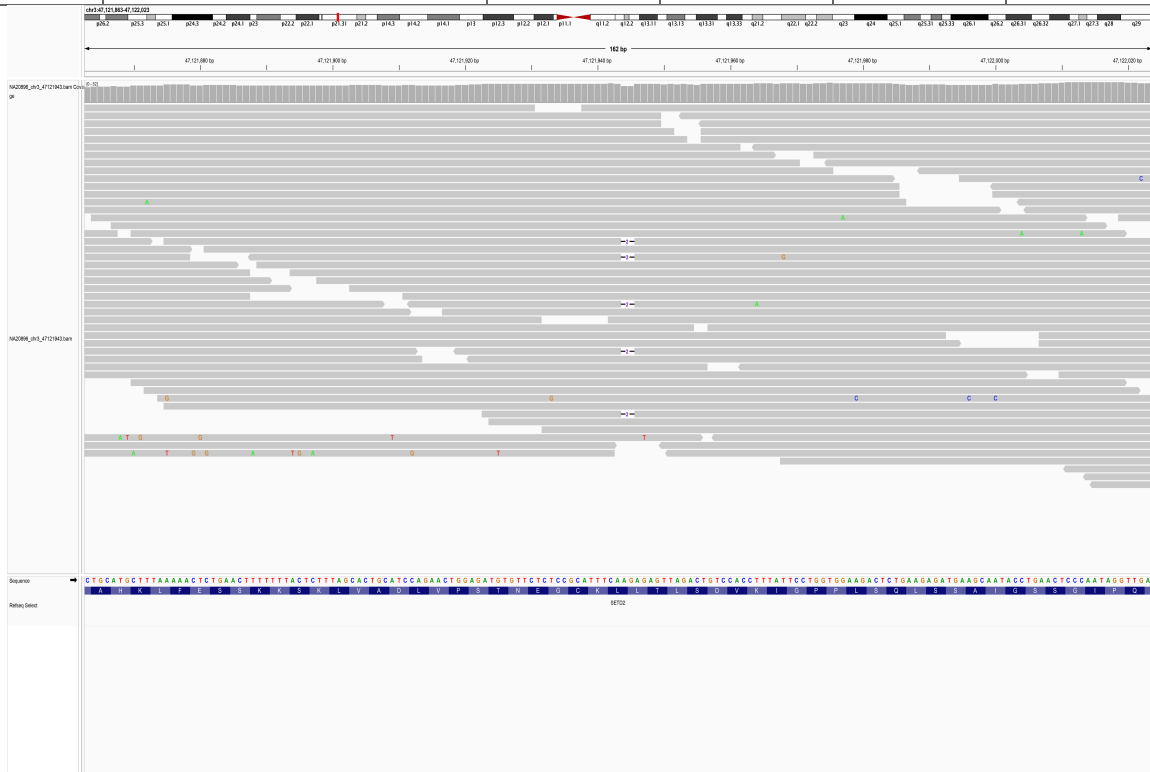

19.13. chr3\_47120398\_CTCT/-

| SampleID | Variants (GRCh38)    | Ref_depth | Alt_depth | Gene  | Consequence        |
|----------|----------------------|-----------|-----------|-------|--------------------|
| HG03439  | chr3_47120398_CTCT/- | 31        | 9         | SETD2 | frameshift_variant |

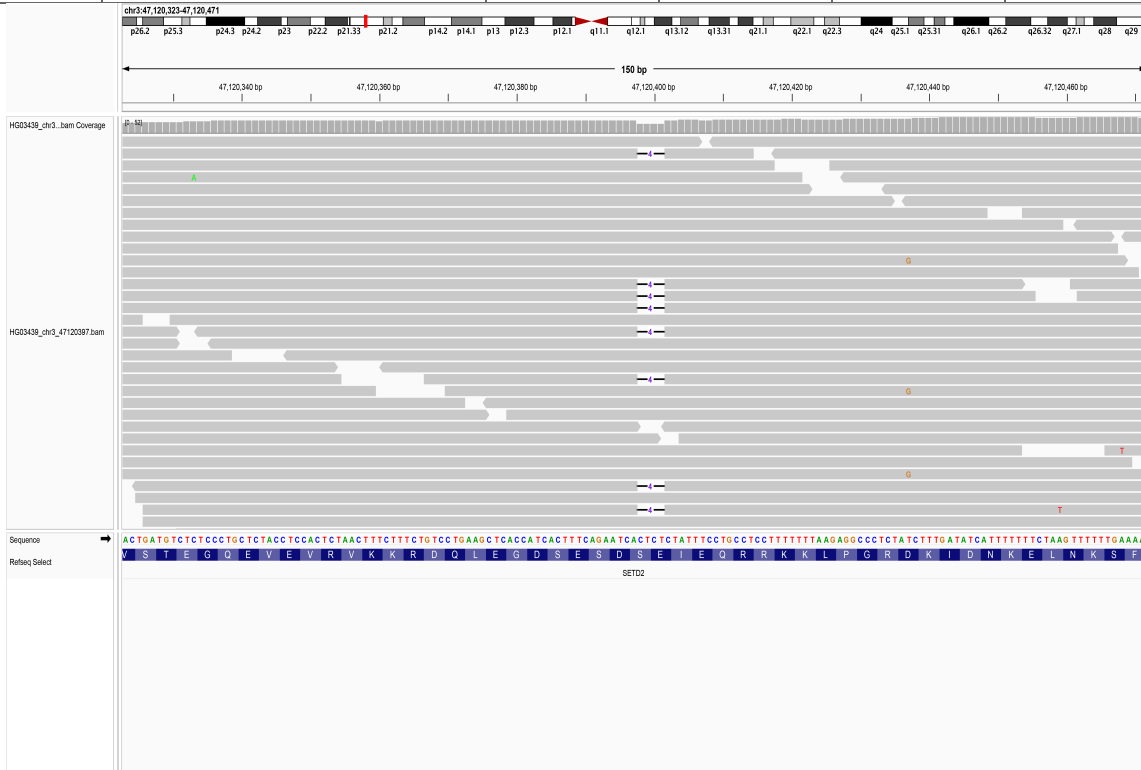

## 20. SETDB1

### 20.1. chr1\_150945053\_G/A

| SampleID | Variants (GRCh38)  | Ref_depth | Alt_depth | Gene   | Consequence |
|----------|--------------------|-----------|-----------|--------|-------------|
| NA18532  | chr1_150945053_G/A | 18        | 6         | SETDB1 | stop_gained |

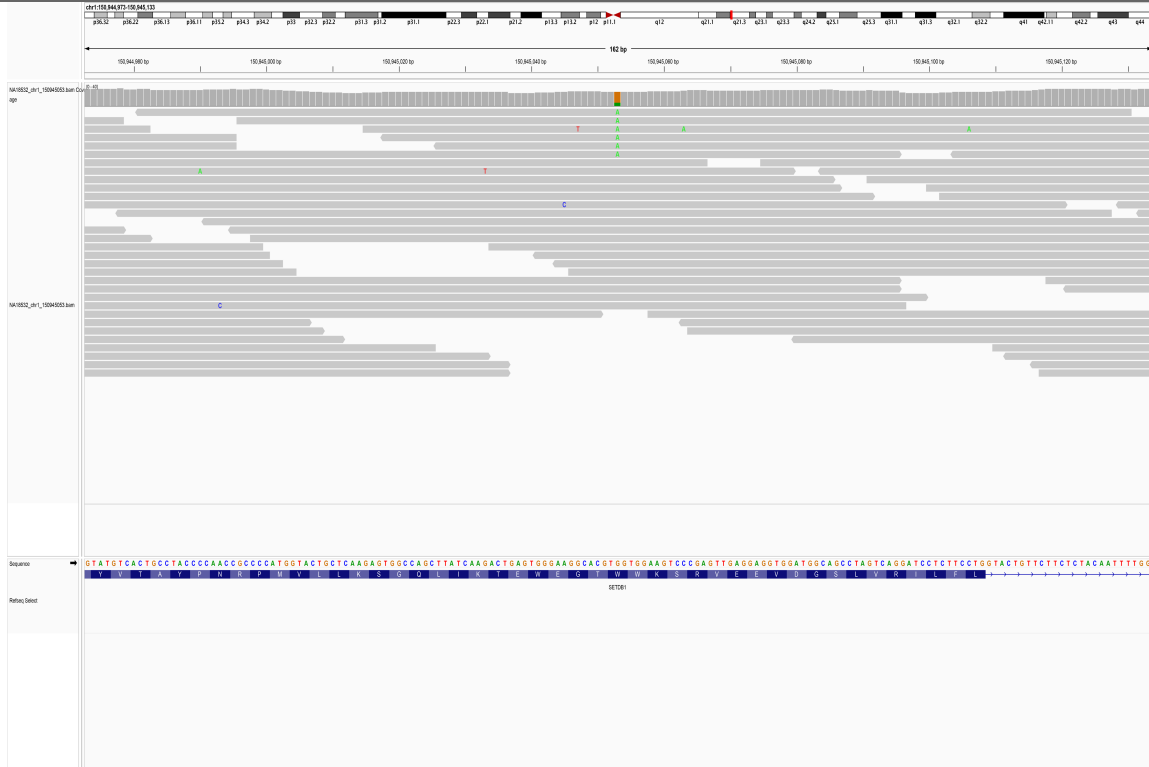

## 21. STAG2

### 21.1. chrX\_124071271\_C/-

| SampleID | Variants (GRCh38)  | Ref_depth | Alt_depth | Gene  | Consequence        |
|----------|--------------------|-----------|-----------|-------|--------------------|
| NA18933  | chrX_124071271_C/- | 20        | 4         | STAG2 | frameshift_variant |

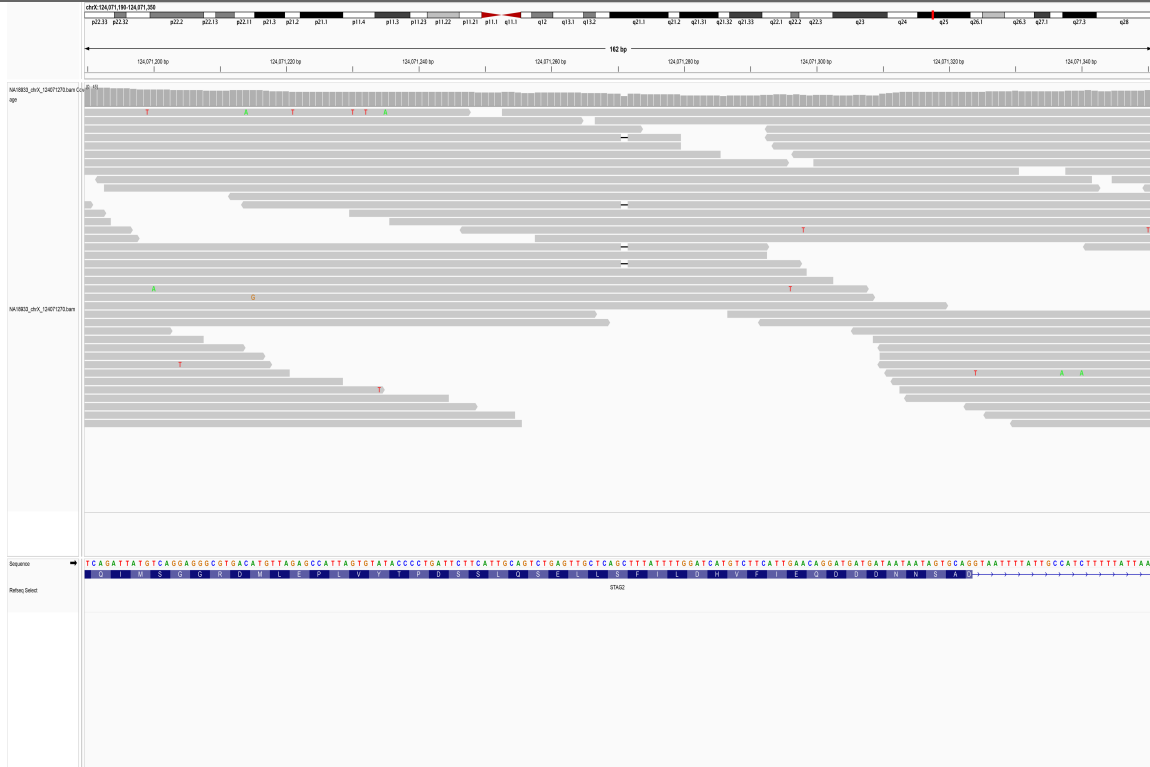



## 22. TET2

### 22.1. chr4\_105275340\_T/-

| SampleID | Variants (GRCh38)  | Ref_depth | Alt_depth | Gene | Consequence        |
|----------|--------------------|-----------|-----------|------|--------------------|
| HG00099  | chr4_105275340_T/- | 34        | 8         | TET2 | frameshift_variant |

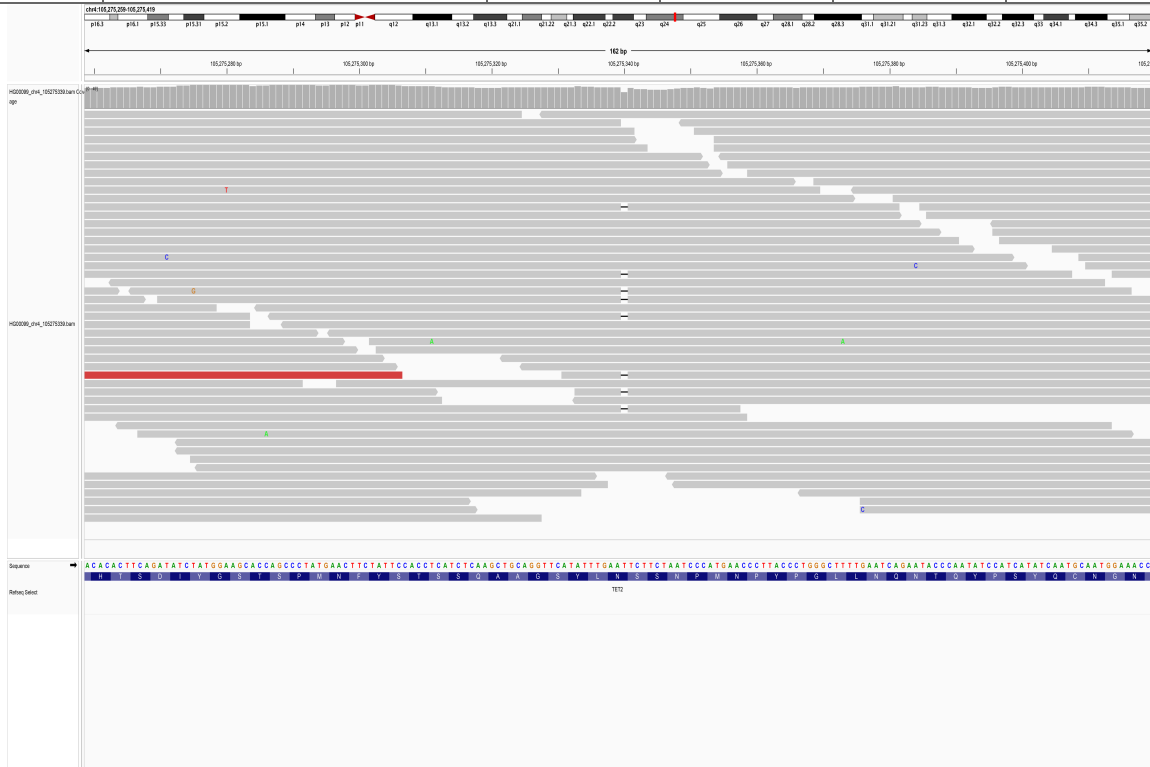

22.2. chr4\_105276118\_T/C

| SampleID | Variants (GRCh38)  | Ref_depth | Alt_depth | Gene | Consequence      |
|----------|--------------------|-----------|-----------|------|------------------|
| HG00113  | chr4_105276118_T/C | 21        | 5         | TET2 | missense_variant |

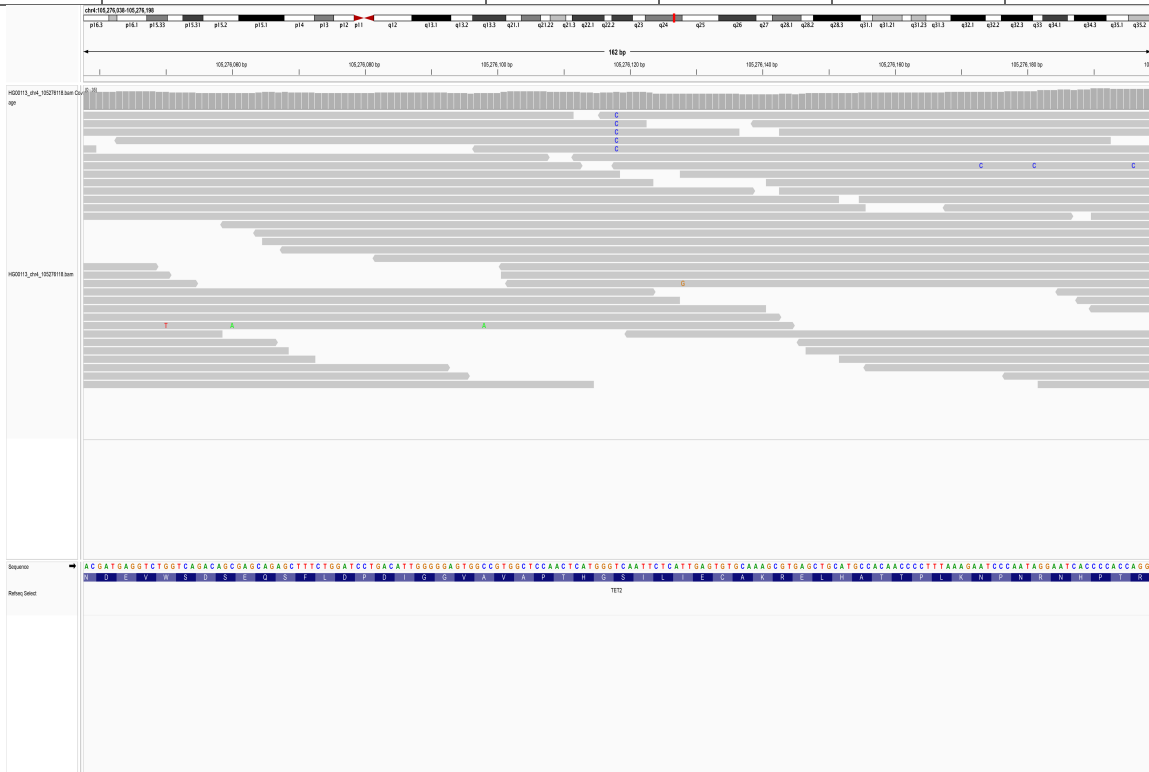

22.3. chr4\_105269676\_G/T

| SampleID | Variants (GRCh38)  | Ref_depth | Alt_depth | Gene | Consequence      |
|----------|--------------------|-----------|-----------|------|------------------|
| HG00245  | chr4_105269676_G/T | 40        | 6         | TET2 | missense_variant |

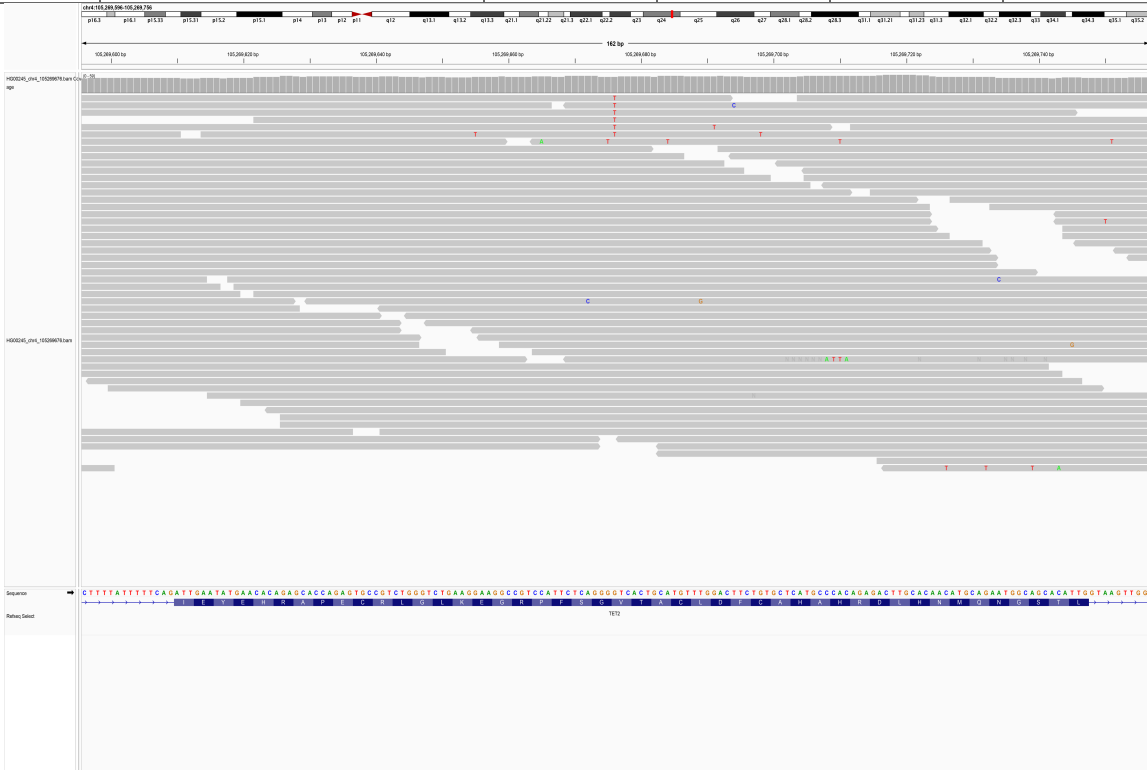

22.4. chr4\_105234521\_T/-

| SampleID | Variants (GRCh38)  | Ref_depth | Alt_depth | Gene | Consequence        |
|----------|--------------------|-----------|-----------|------|--------------------|
| HG00620  | chr4_105234521_T/- | 37        | 6         | TET2 | frameshift_variant |

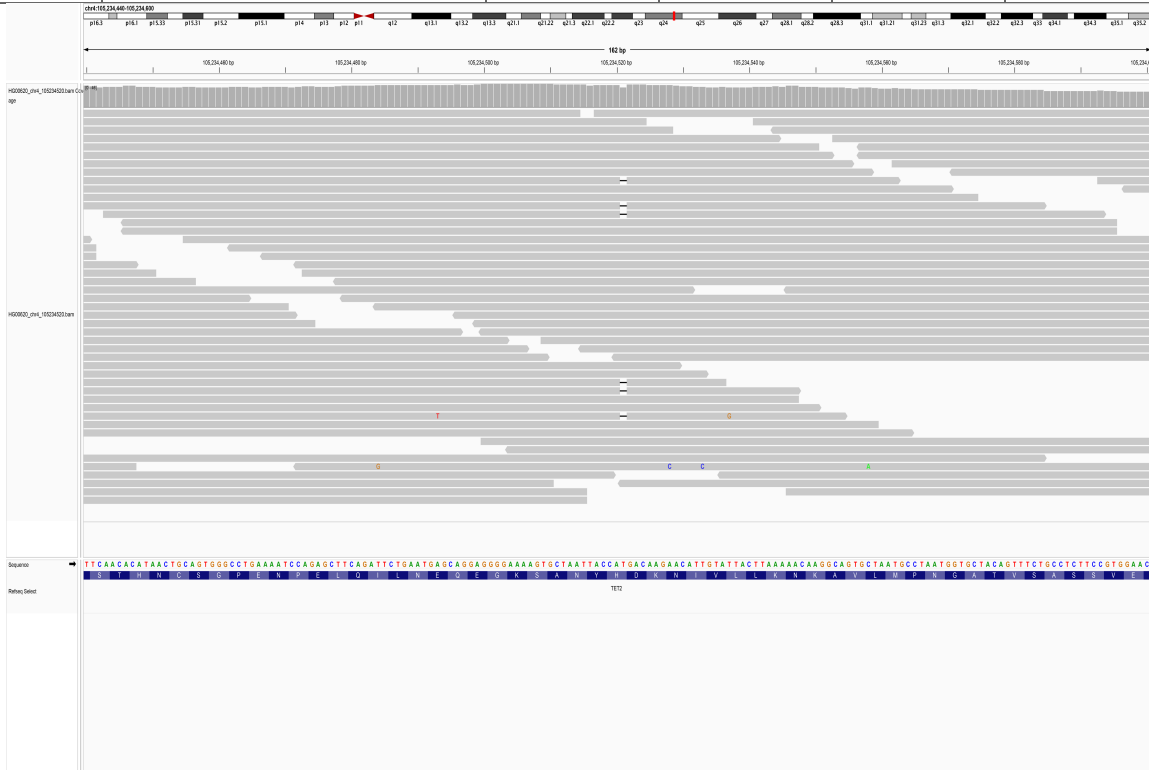

22.5. chr4\_105236859\_-/TG

| SampleID | Variants (GRCh38)   | Ref_depth | Alt_depth | Gene | Consequence        |
|----------|---------------------|-----------|-----------|------|--------------------|
| HG01064  | chr4_105236859_-/TG | 32        | 3         | TET2 | frameshift_variant |

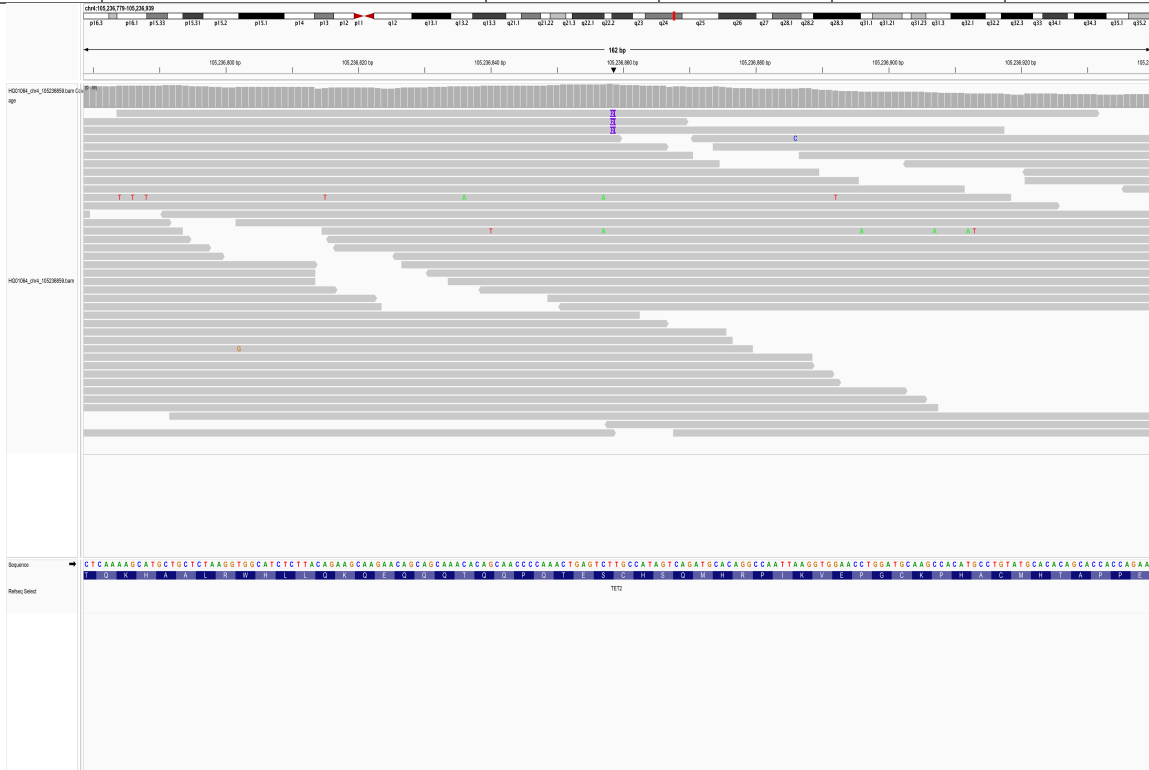

22.6. chr4\_105275548\_C/T

| SampleID | Variants (GRCh38)  | Ref_depth | Alt_depth | Gene | Consequence |
|----------|--------------------|-----------|-----------|------|-------------|
| HG01069  | chr4_105275548_C/T | 54        | 5         | TET2 | stop_gained |

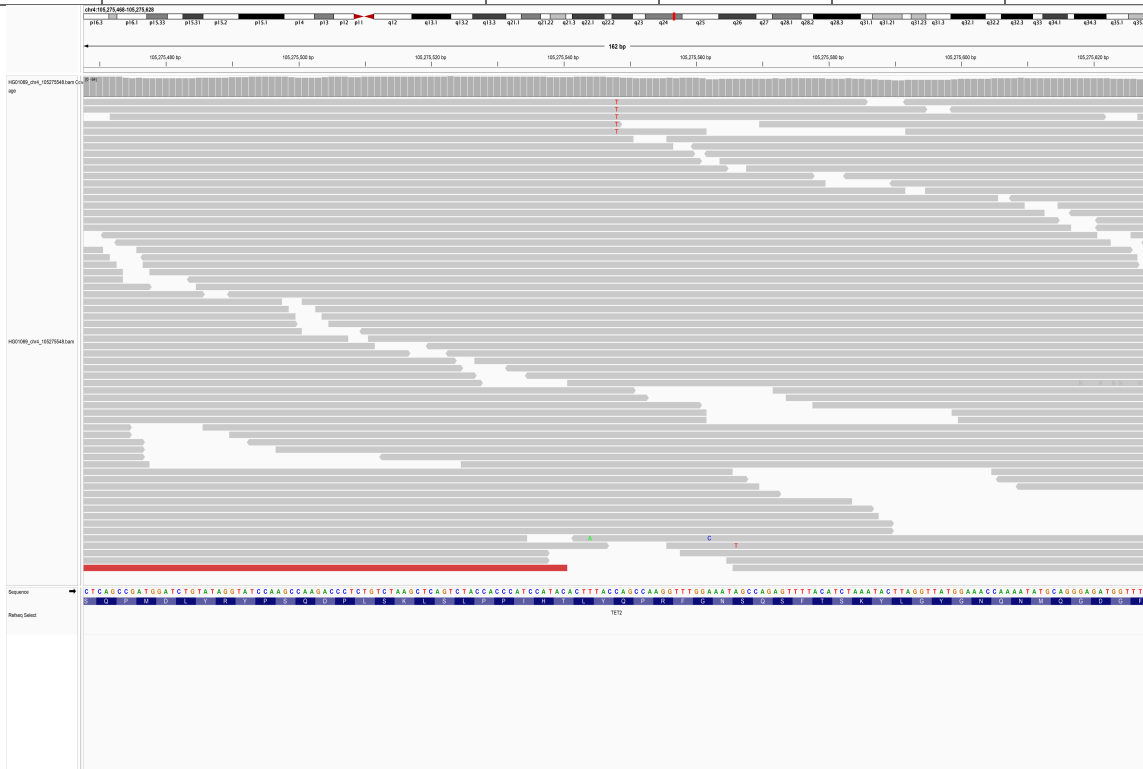

22.7. chr4\_105241383\_-/G

| SampleID | Variants (GRCh38)  | Ref_depth | Alt_depth | Gene | Consequence        |
|----------|--------------------|-----------|-----------|------|--------------------|
| HG01606  | chr4_105241383_-/G | 28        | 9         | TET2 | frameshift_variant |

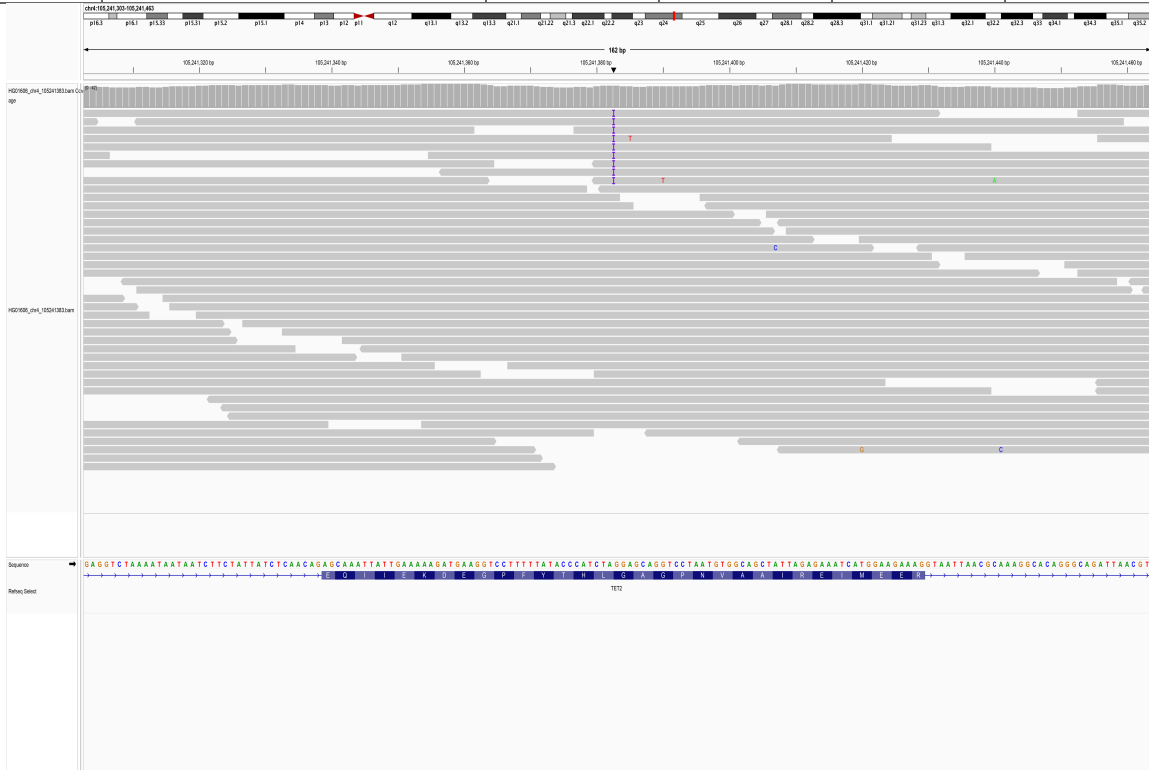

22.8. chr4\_105234442\_C/G

| SampleID | Variants (GRCh38)  | Ref_depth | Alt_depth | Gene | Consequence |
|----------|--------------------|-----------|-----------|------|-------------|
| HG02078  | chr4_105234442_C/G | 22        | 7         | TET2 | stop_gained |

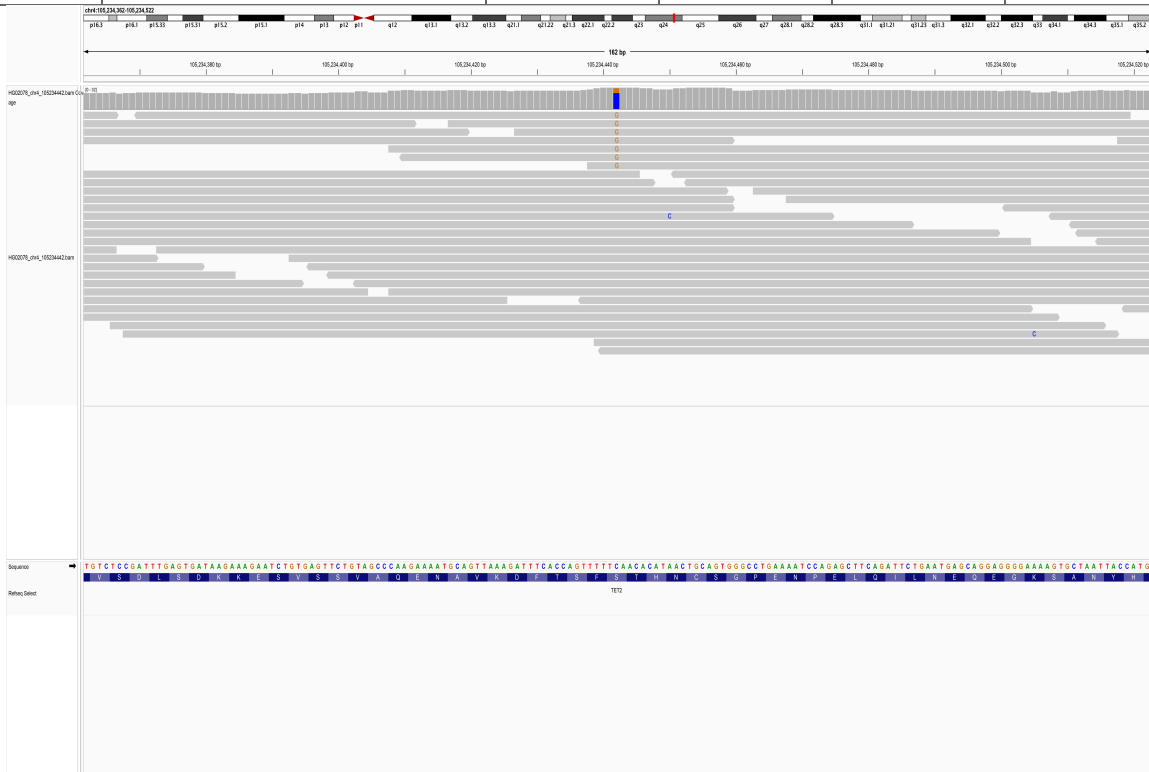

22.9. chr4\_105241421\_G/A

| SampleID | Variants (GRCh38)  | Ref_depth | Alt_depth | Gene | Consequence      |
|----------|--------------------|-----------|-----------|------|------------------|
| HG02107  | chr4_105241421_G/A | 44        | 10        | TET2 | missense_variant |

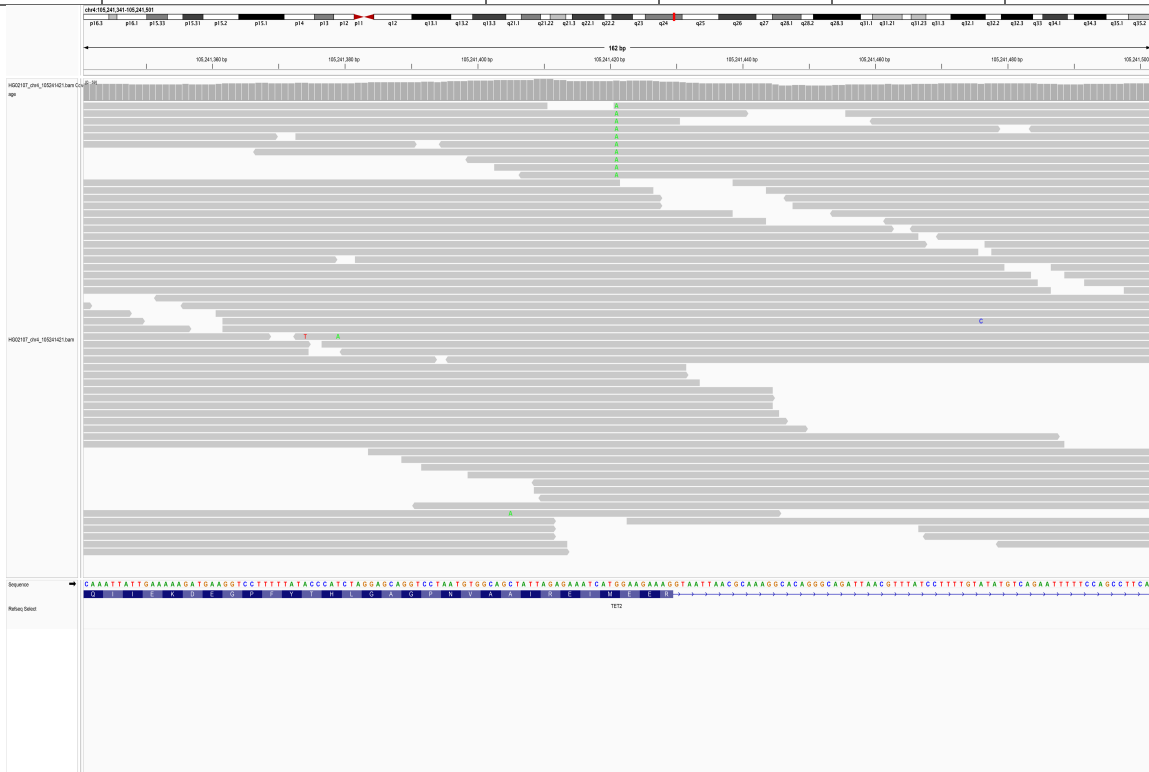

22.10. chr4\_105259617\_A/G

| SampleID | Variants (GRCh38)  | Ref_depth | Alt_depth | Gene | Consequence             |
|----------|--------------------|-----------|-----------|------|-------------------------|
| HG02484  | chr4_105259617_A/G | 38        | 6         | TET2 | splice_acceptor_variant |

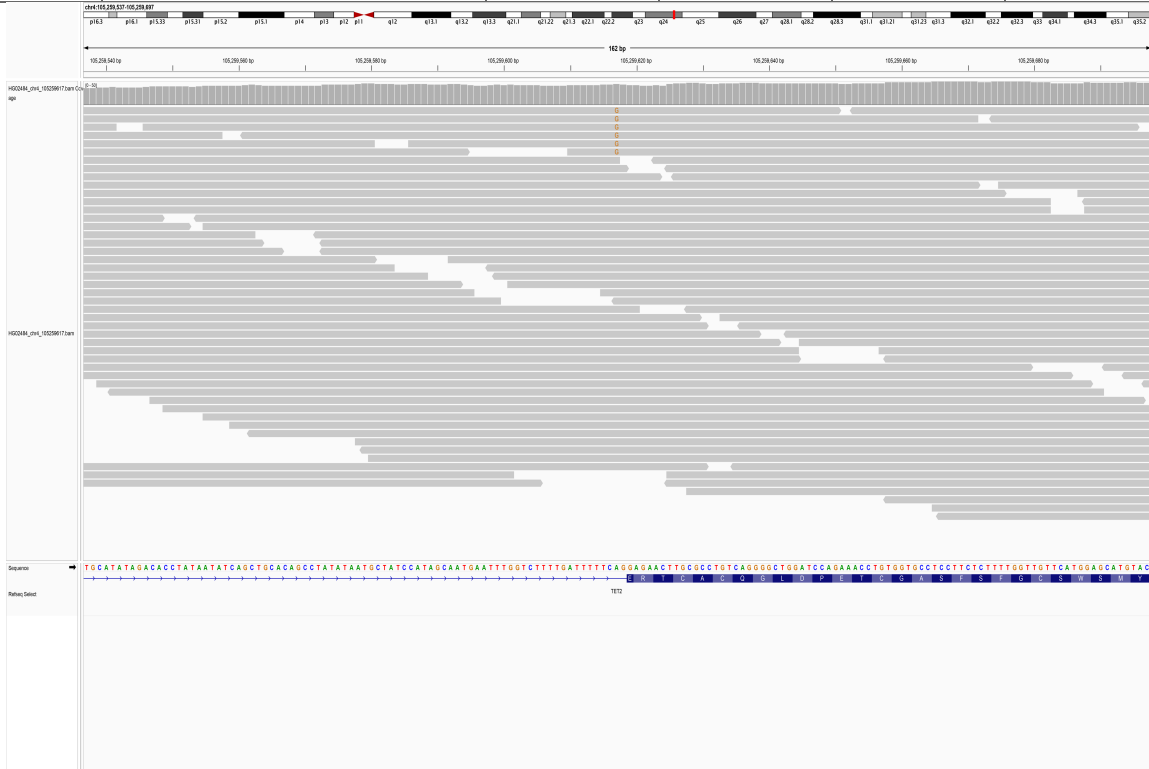

22.11. chr4\_105236813\_-/A

| SampleID | Variants (GRCh38)  | Ref_depth | Alt_depth | Gene | Consequence        |
|----------|--------------------|-----------|-----------|------|--------------------|
| HG02502  | chr4_105236813_-/A | 28        | 4         | TET2 | frameshift_variant |

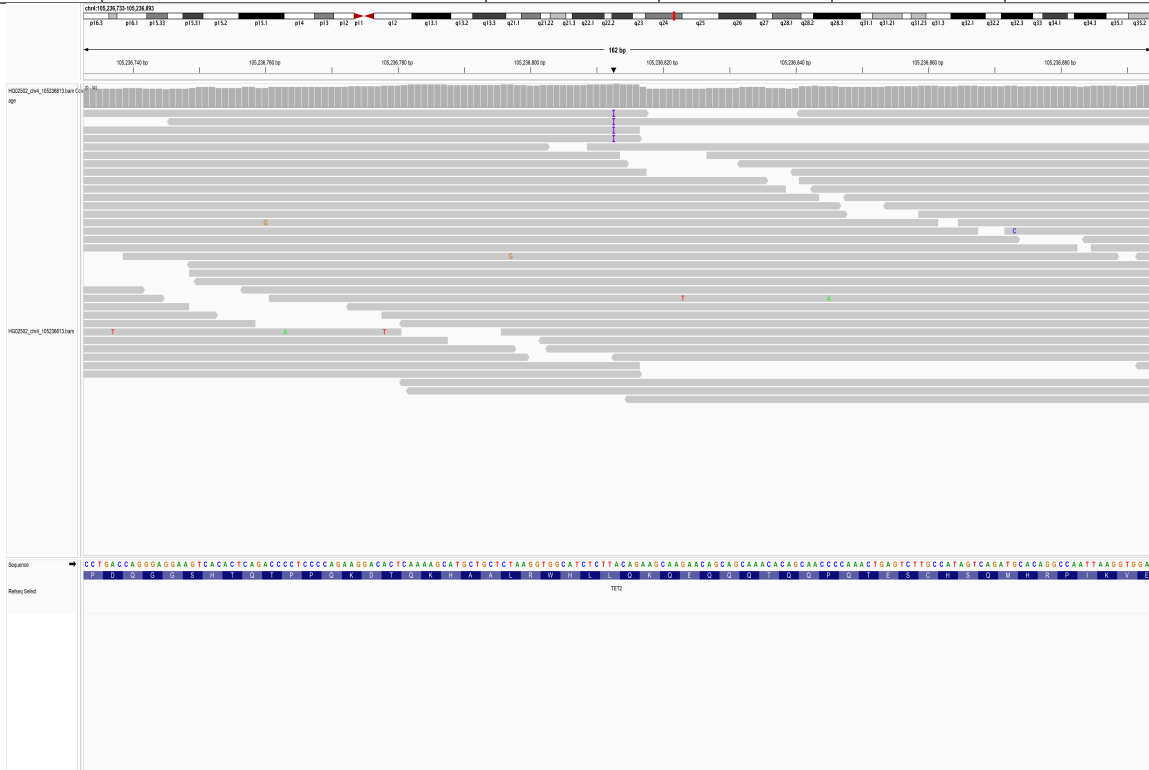

22.12. chr4\_105276106\_C/T

| SampleID | Variants (GRCh38)  | Ref_depth | Alt_depth | Gene | Consequence      |
|----------|--------------------|-----------|-----------|------|------------------|
| HG02661  | chr4_105276106_C/T | 33        | 10        | TET2 | missense_variant |

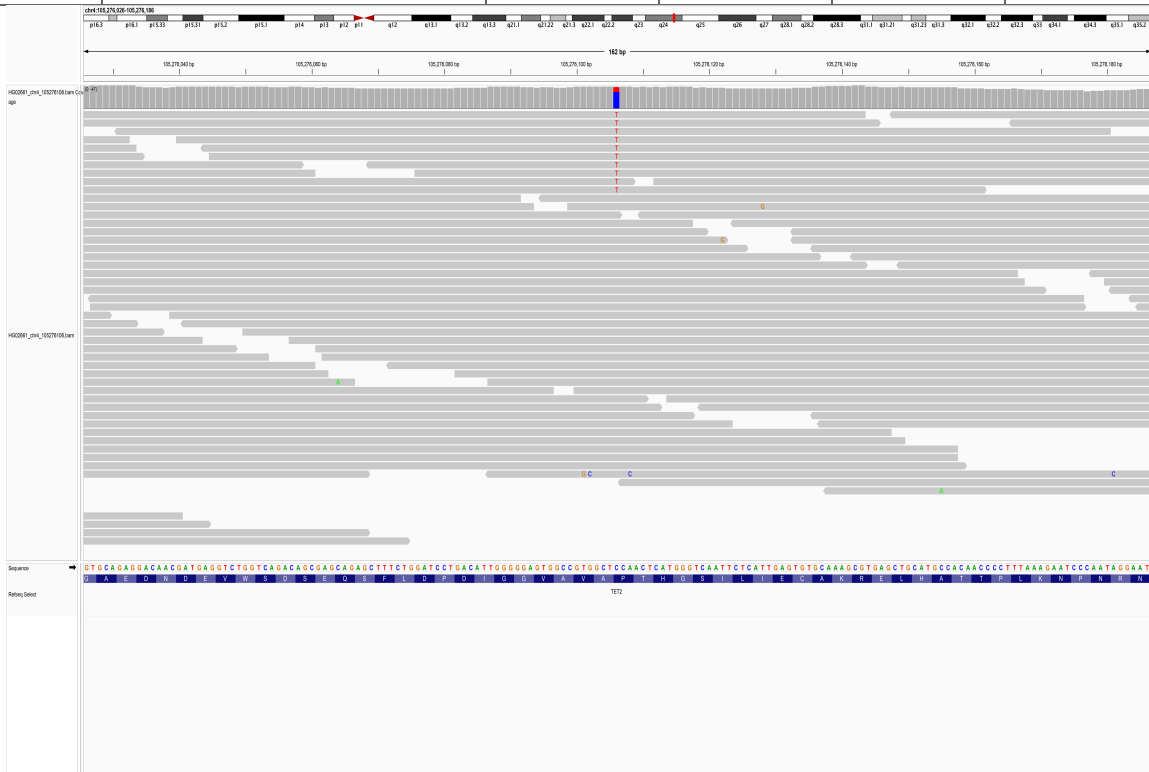

22.13. chr4\_105235265\_-/T

| SampleID | Variants (GRCh38)  | Ref_depth | Alt_depth | Gene | Consequence        |
|----------|--------------------|-----------|-----------|------|--------------------|
| HG03280  | chr4_105235265_-/T | 31        | 4         | TET2 | frameshift_variant |

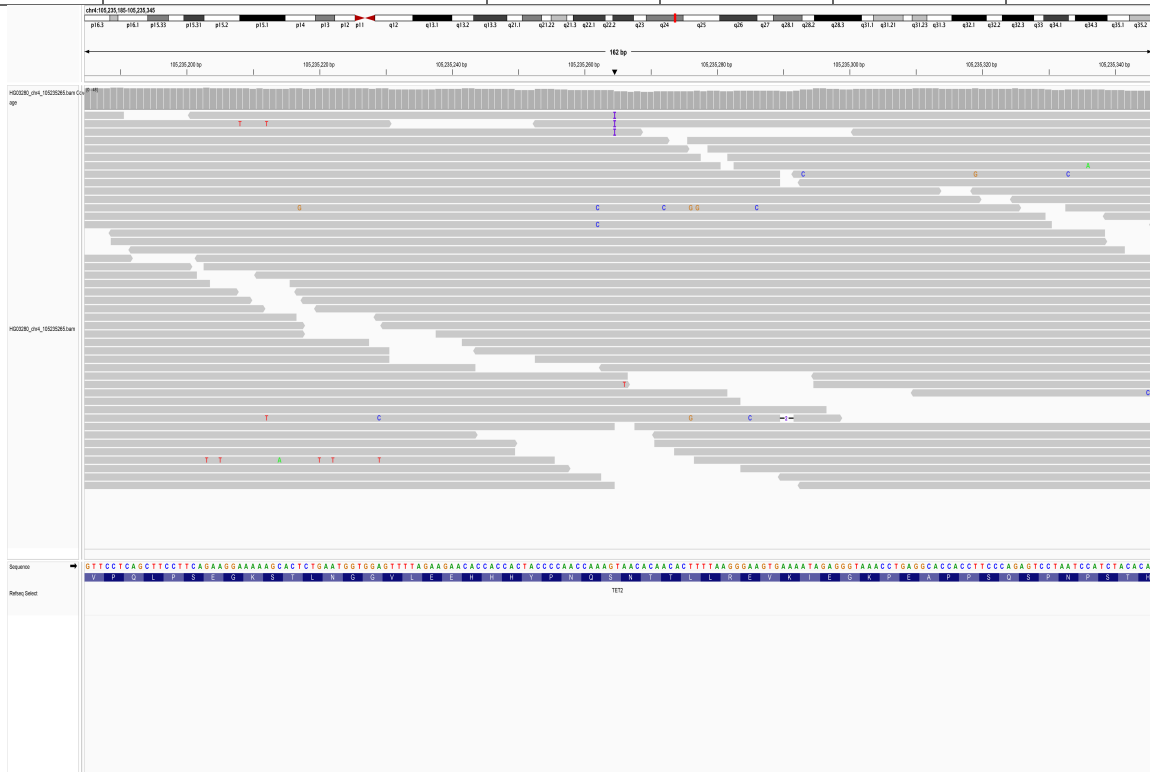

22.14. chr4\_105269640\_C/T

| SampleID | Variants (GRCh38)  | Ref_depth | Alt_depth | Gene | Consequence      |
|----------|--------------------|-----------|-----------|------|------------------|
| HG03709  | chr4_105269640_C/T | 29        | 3         | TET2 | missense_variant |

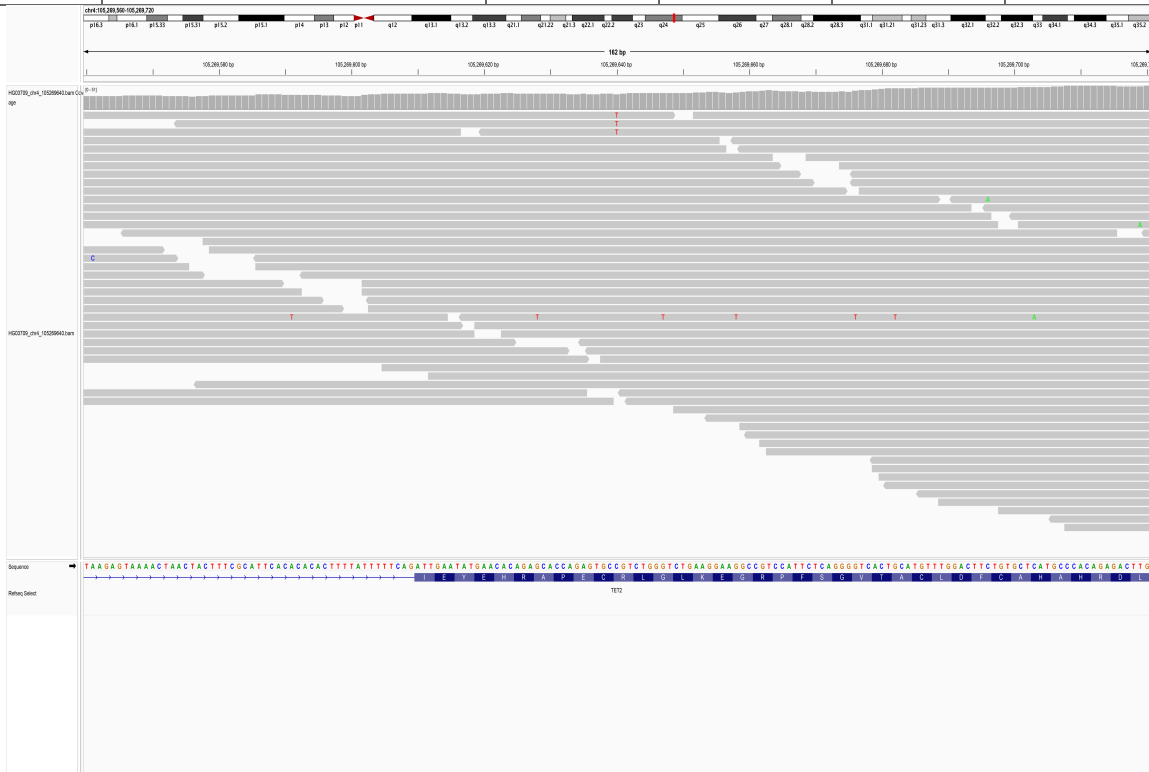

22.15. chr4\_105276152\_A/G

| SampleID | Variants (GRCh38)  | Ref_depth | Alt_depth | Gene | Consequence      |
|----------|--------------------|-----------|-----------|------|------------------|
| HG04047  | chr4_105276152_A/G | 43        | 4         | TET2 | missense_variant |

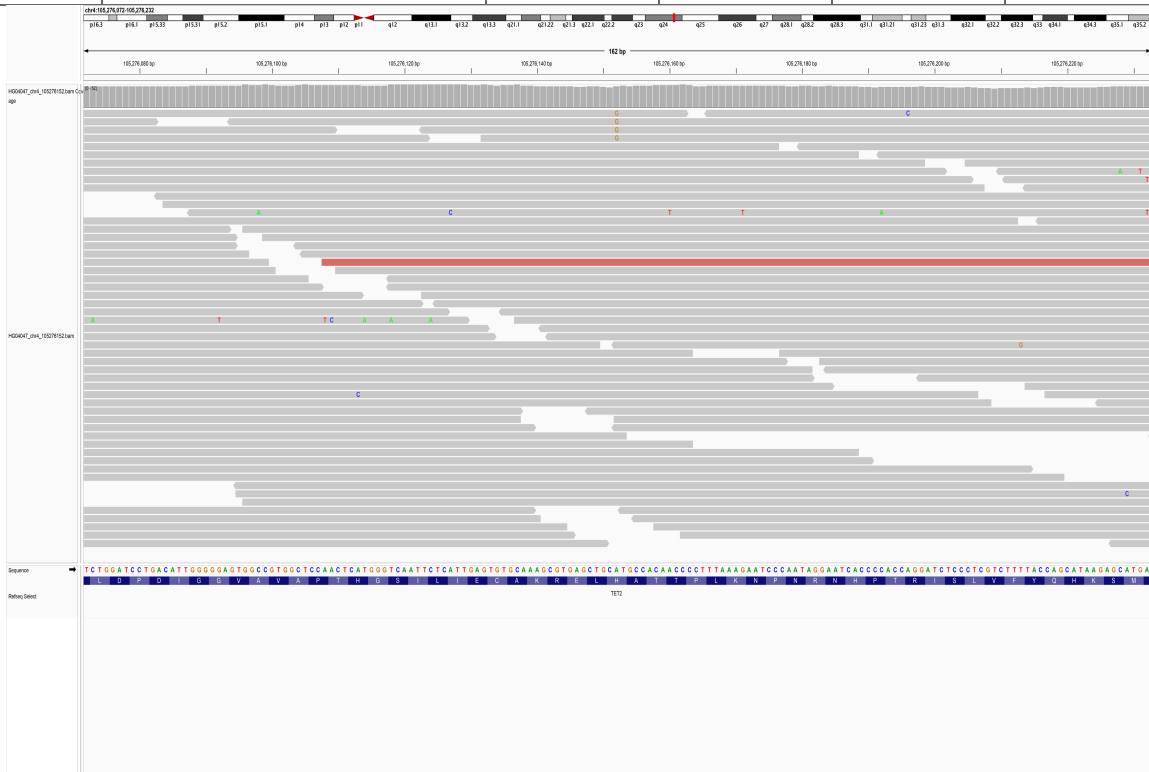

22.16. chr4\_105272774\_C/T

| SampleID | Variants (GRCh38)  | Ref_depth | Alt_depth | Gene | Consequence |
|----------|--------------------|-----------|-----------|------|-------------|
| NA10851  | chr4_105272774_C/T | 25        | 3         | TET2 | stop_gained |

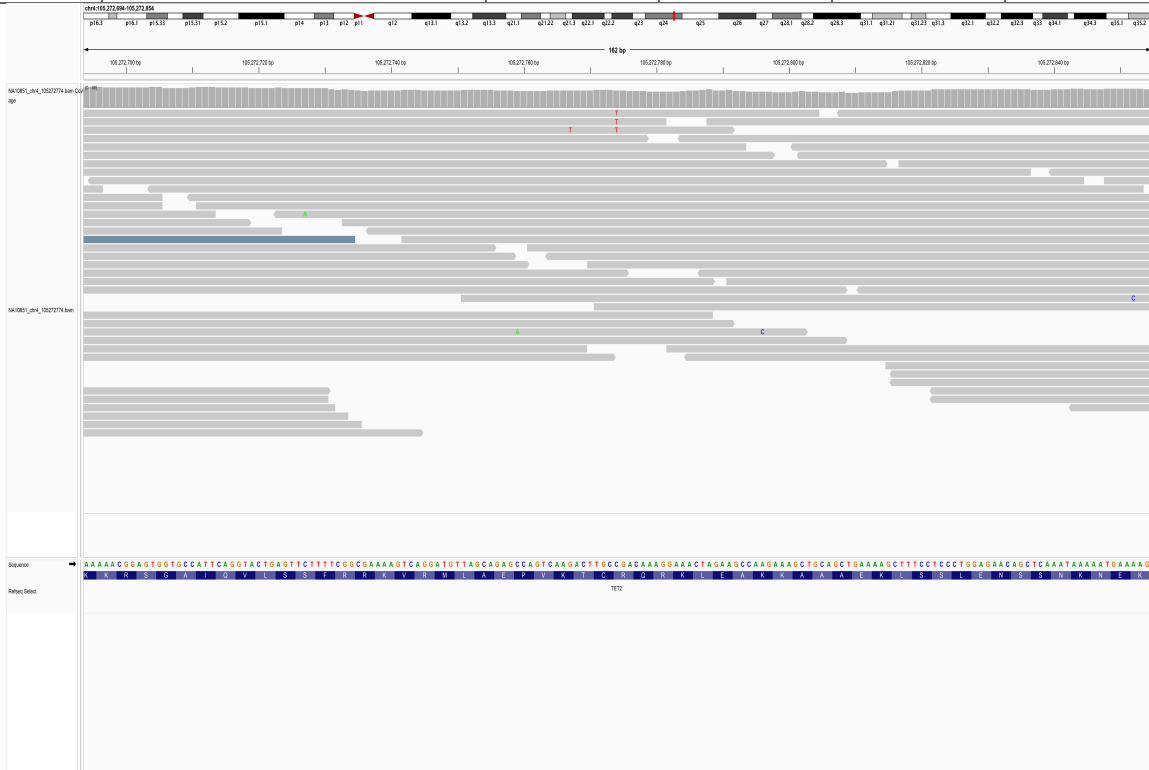

22.17. chr4\_105243739\_-/A

| SampleID | Variants (GRCh38)  | Ref_depth | Alt_depth | Gene | Consequence |
|----------|--------------------|-----------|-----------|------|-------------|
| NA12762  | chr4_105243739_-/A | 22        | 5         | TET2 | stop_gained |

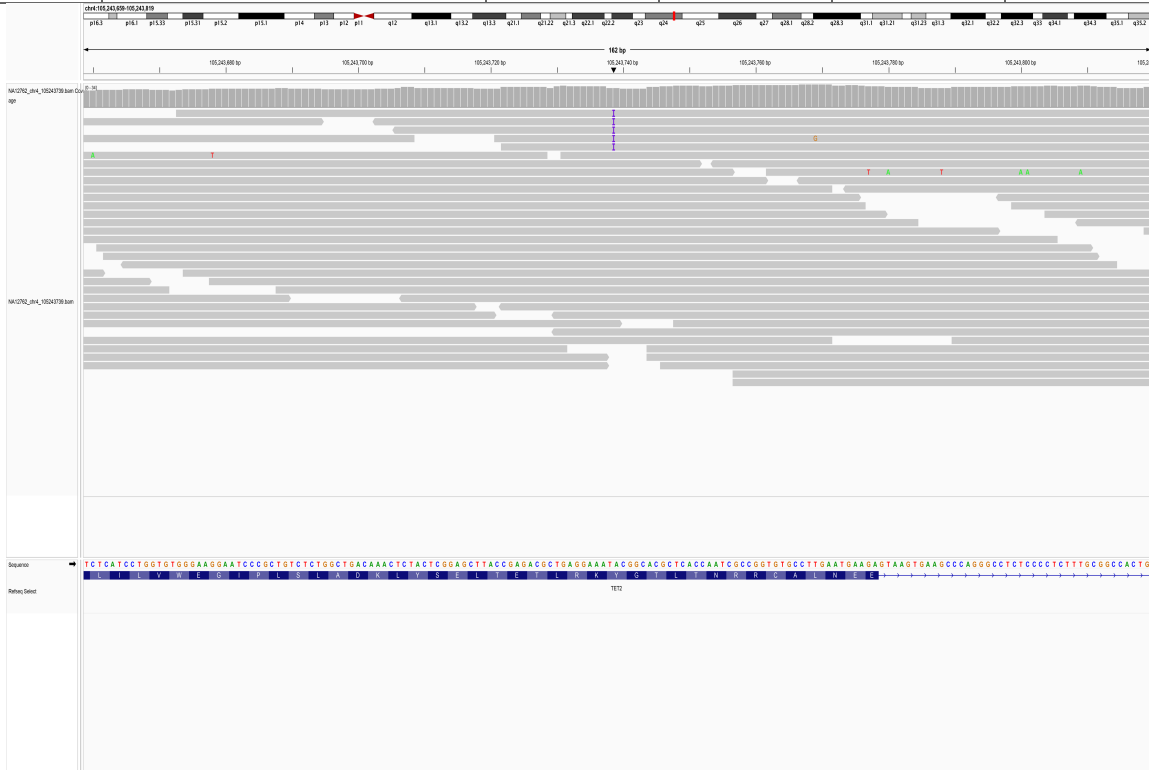

22.18. chr4\_105235590\_C/T

| SampleID | Variants (GRCh38)  | Ref_depth | Alt_depth | Gene | Consequence |
|----------|--------------------|-----------|-----------|------|-------------|
| NA18634  | chr4_105235590_C/T | 29        | 8         | TET2 | stop_gained |

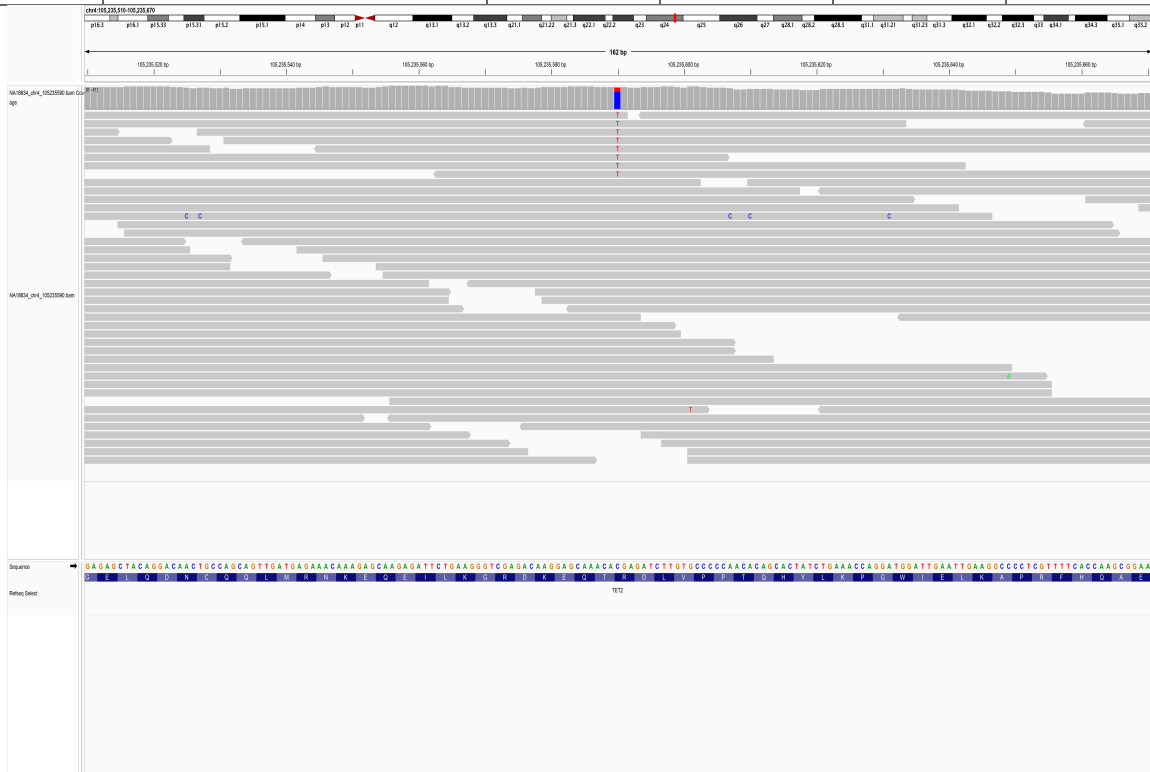

22.19. chr4\_105234536\_A/-

| SampleID | Variants (GRCh38)  | Ref_depth | Alt_depth | Gene | Consequence        |
|----------|--------------------|-----------|-----------|------|--------------------|
| NA18991  | chr4_105234536_A/- | 33        | 4         | TET2 | frameshift_variant |

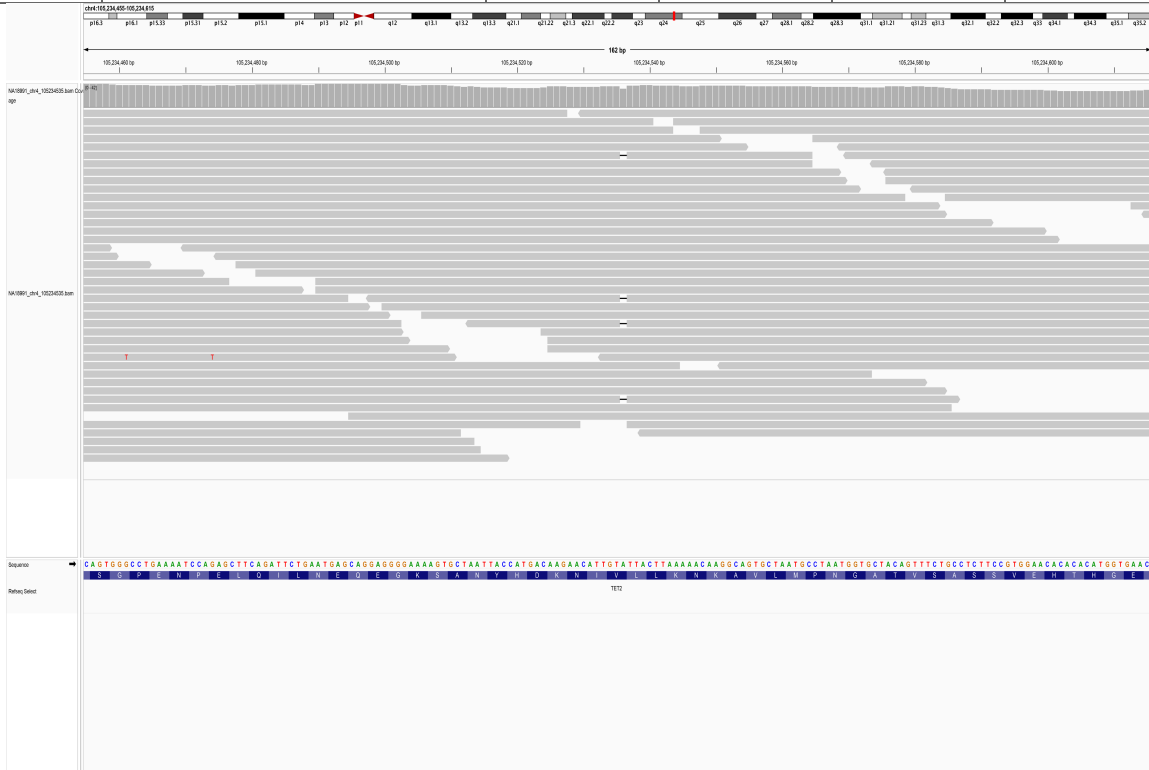

22.20. chr4\_105237346\_G/A

| SampleID | Variants (GRCh38)  | Ref_depth | Alt_depth | Gene | Consequence      |
|----------|--------------------|-----------|-----------|------|------------------|
| NA19222  | chr4_105237346_G/A | 26        | 3         | TET2 | missense_variant |

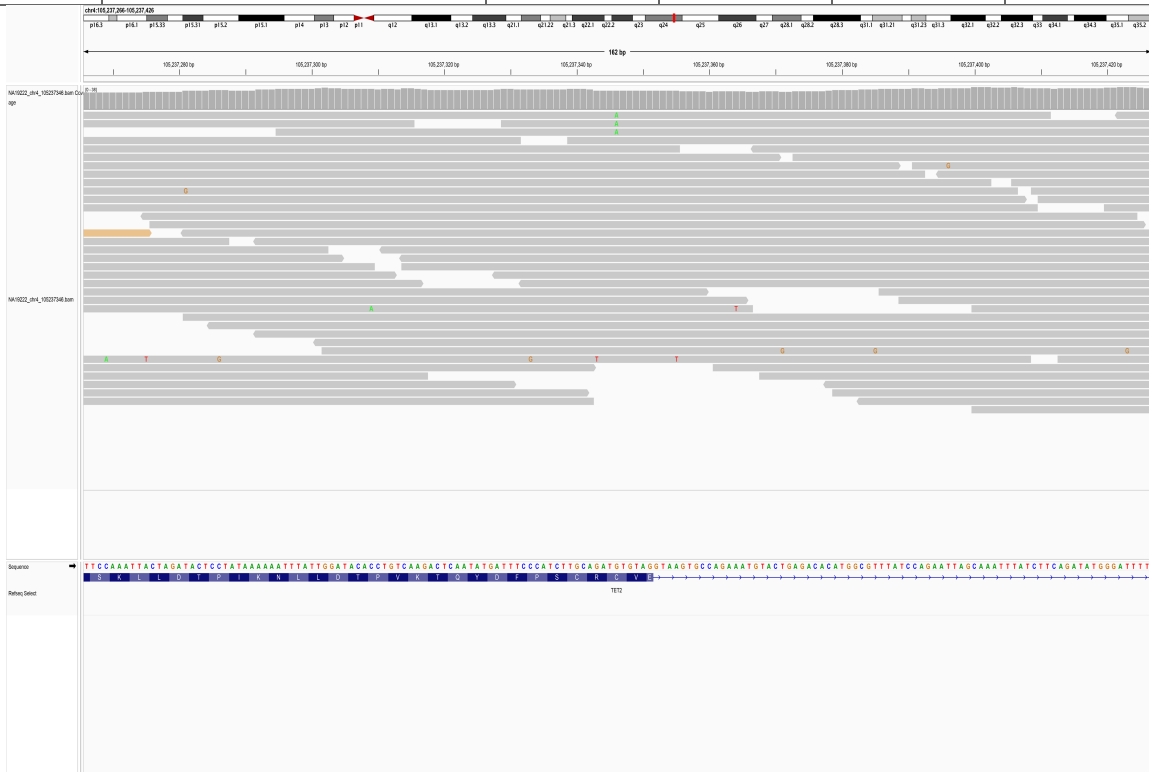

22.21. chr4\_105259675\_T/G

| SampleID | Variants (GRCh38)  | Ref_depth | Alt_depth | Gene | Consequence      |
|----------|--------------------|-----------|-----------|------|------------------|
| NA19327  | chr4_105259675_T/G | 42        | 5         | TET2 | missense_variant |

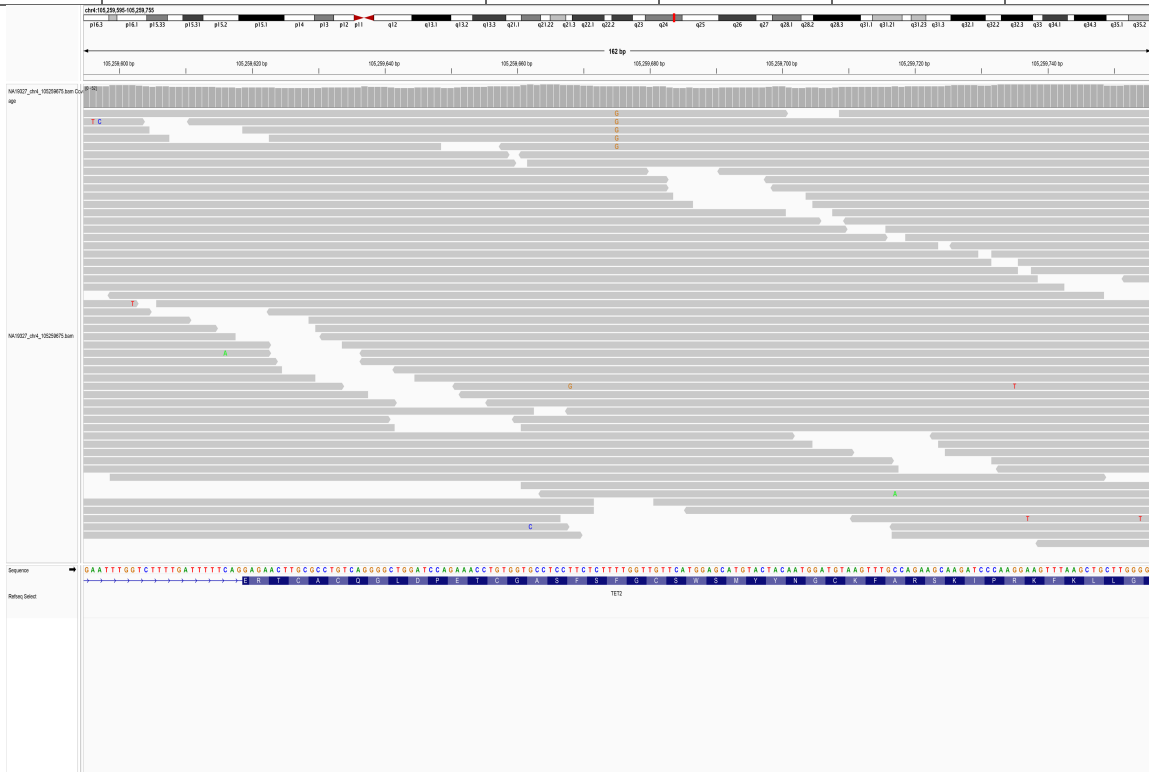

22.22. chr4\_105242911\_G/A

| SampleID | Variants (GRCh38)  | Ref_depth | Alt_depth | Gene | Consequence      |
|----------|--------------------|-----------|-----------|------|------------------|
| NA20581  | chr4_105242911_G/A | 27        | 10        | TET2 | missense_variant |

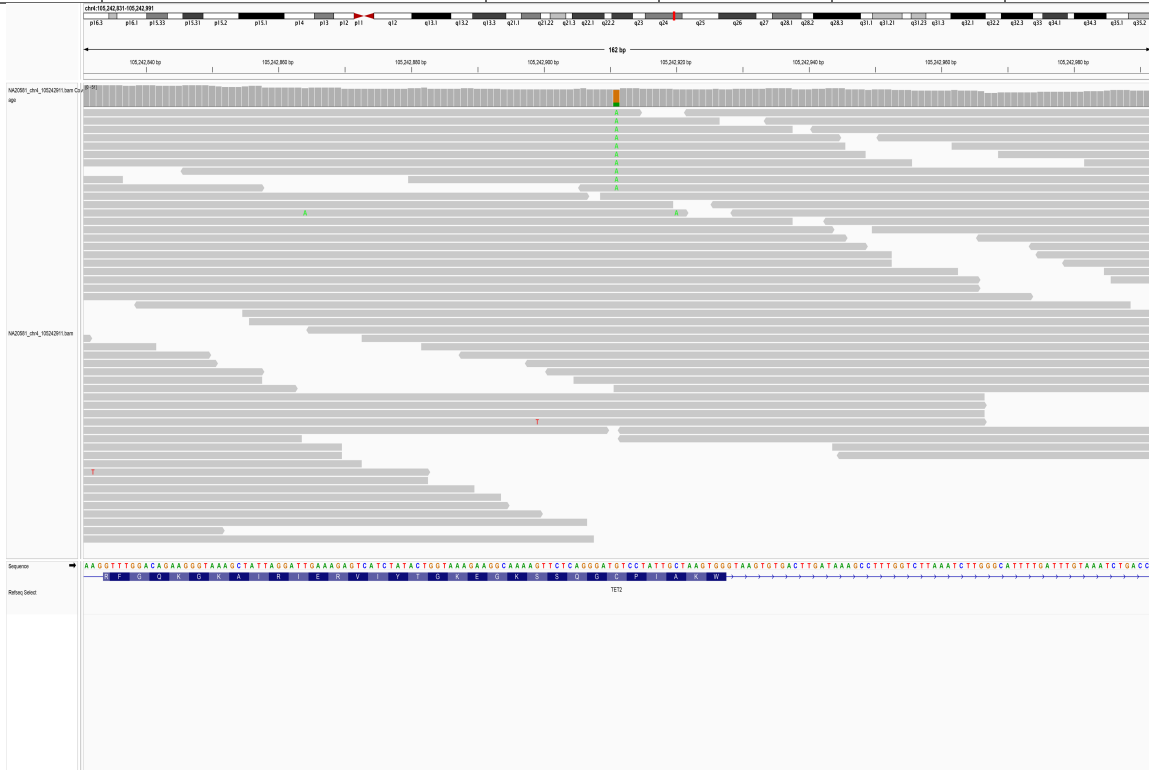

22.23. chr4\_105241429\_G/T

| SampleID | Variants (GRCh38)  | Ref_depth | Alt_depth | Gene | Consequence      |
|----------|--------------------|-----------|-----------|------|------------------|
| HG03476  | chr4_105241429_G/T | 26        | 3         | TET2 | missense_variant |

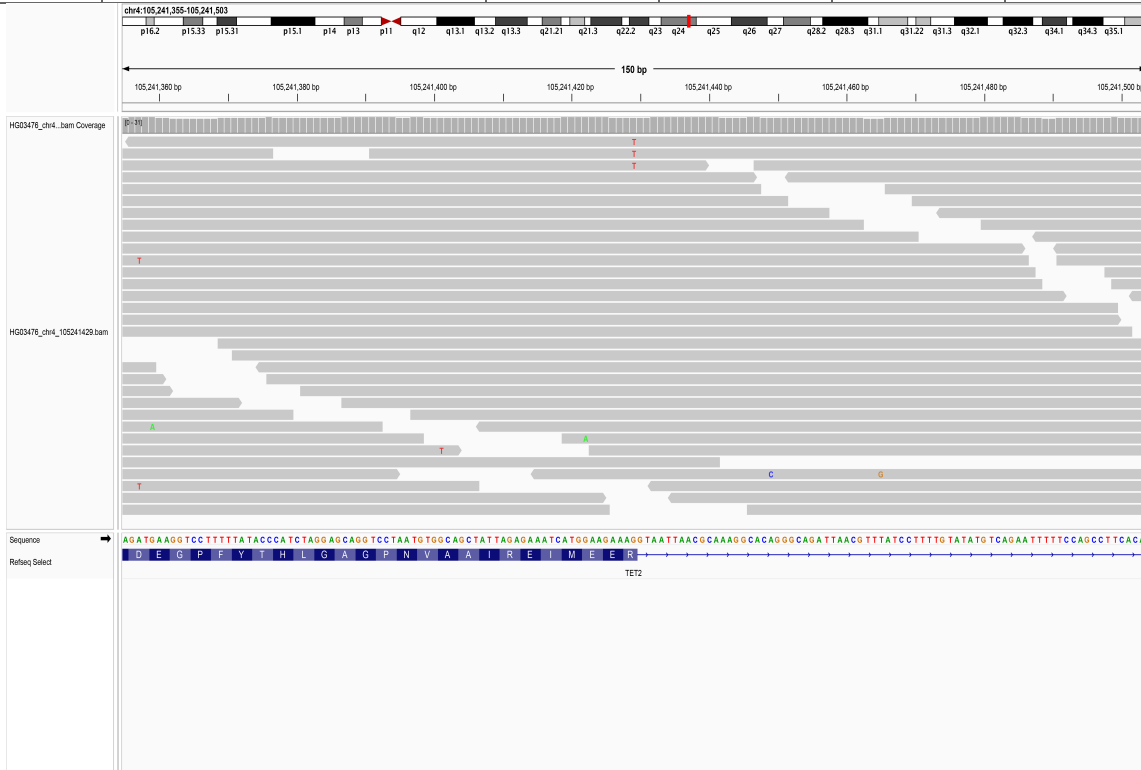

### 23. TP53

#### 23.1. chr17\_7675229\_GGGGAGTACTGTAGGAAGAGGAAGGAGACAGAGTT/-

| SampleID | Variants (GRCh38)                                           | Ref_depth | Alt_depth | Gene | Consequence                 |
|----------|-------------------------------------------------------------|-----------|-----------|------|-----------------------------|
| HG02221  | chr17_7675229_GGGGAGT<br>ACTGTAGGAAGAGGAAG<br>GAGACAGAGTT/- | 47        | 4         | TP53 | splice_acceptor_varia<br>nt |

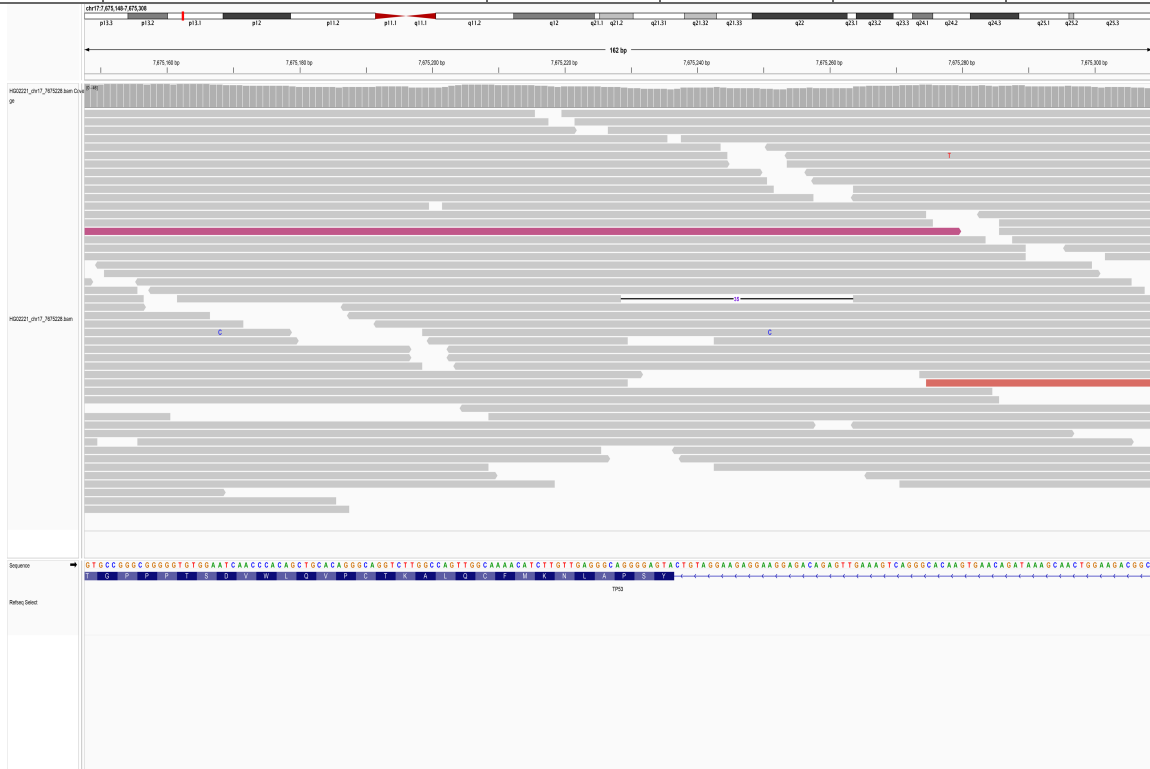

23.2. chr17\_7674252\_C/T

| SampleID | Variants (GRCh38) | Ref_depth | Alt_depth | Gene | Consequence      |
|----------|-------------------|-----------|-----------|------|------------------|
| HG03742  | chr17_7674252_C/T | 31        | 4         | TP53 | missense_variant |

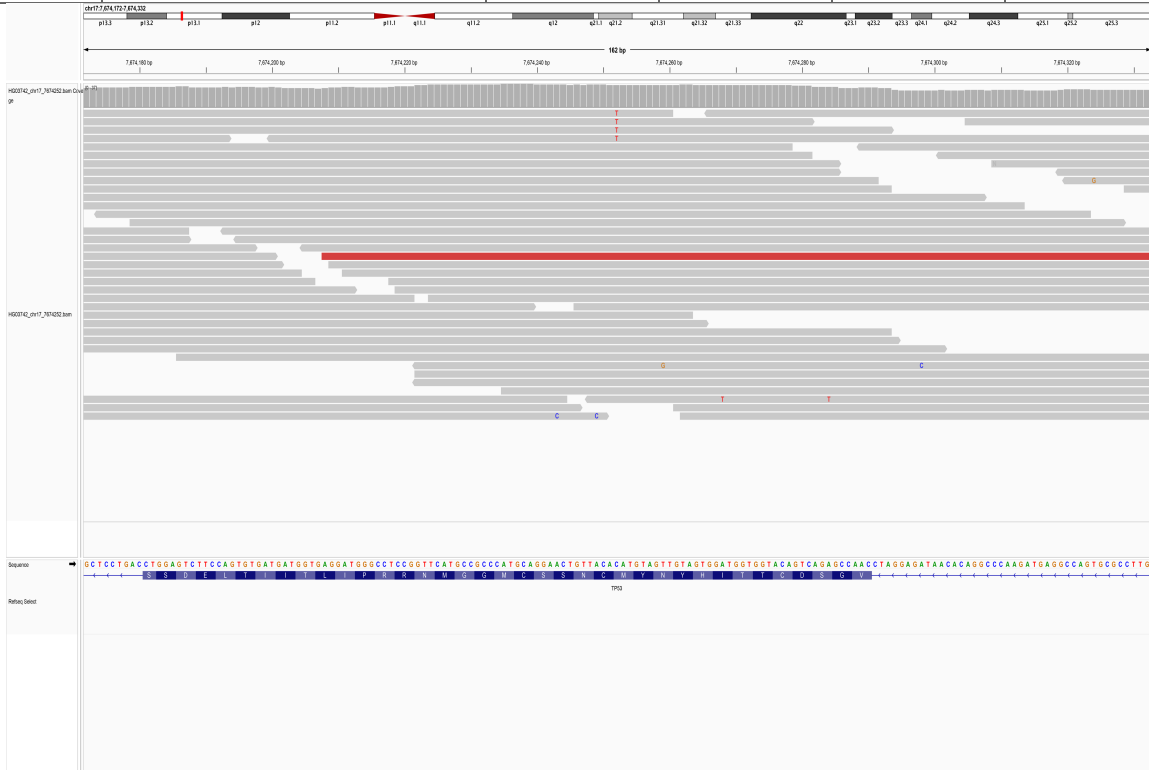



24.2. chr11\_32396377\_-/GACC

| SampleID | Variants (GRCh38)     | Ref_depth | Alt_depth | Gene | Consequence        |
|----------|-----------------------|-----------|-----------|------|--------------------|
| NA18912  | chr11_32396377_-/GACC | 42        | 6         | WT1  | frameshift_variant |

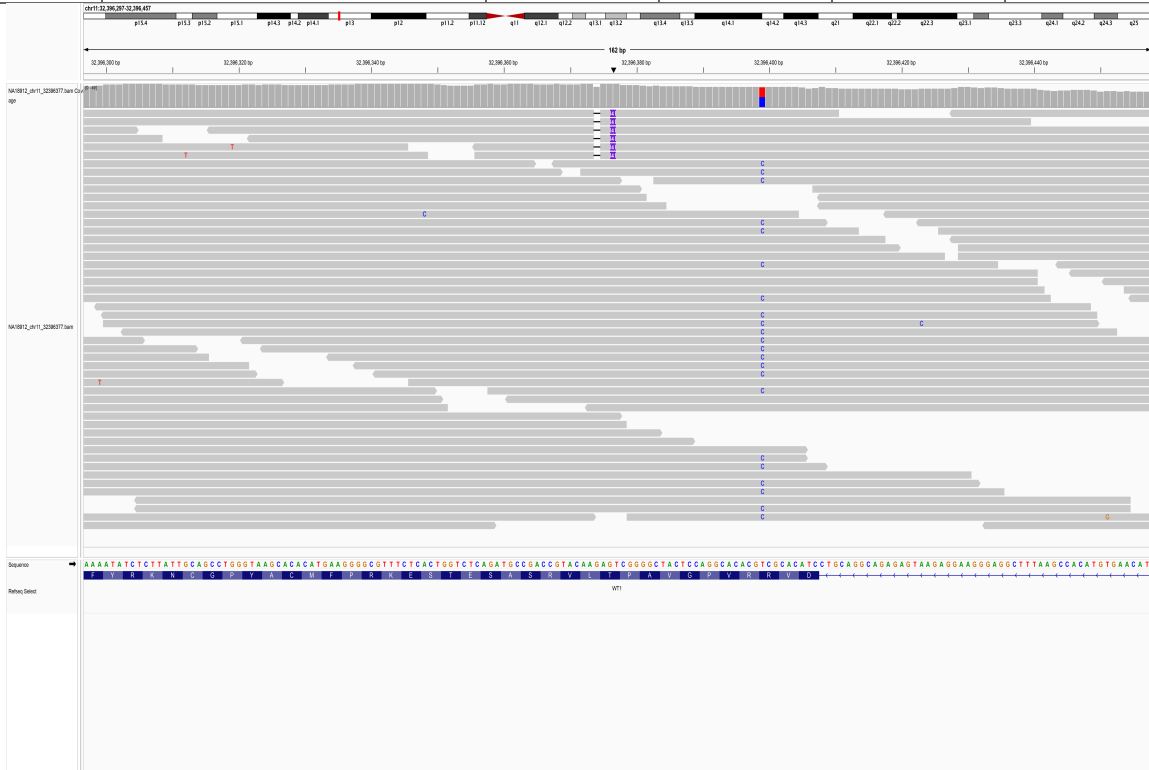

24.3. chr11\_32396374\_G/-

| SampleID | Variants (GRCh38)  | Ref_depth | Alt_depth | Gene | Consequence        |
|----------|--------------------|-----------|-----------|------|--------------------|
| NA18912  | chr11_32396374_G/- | 42        | 6         | WT1  | frameshift_variant |

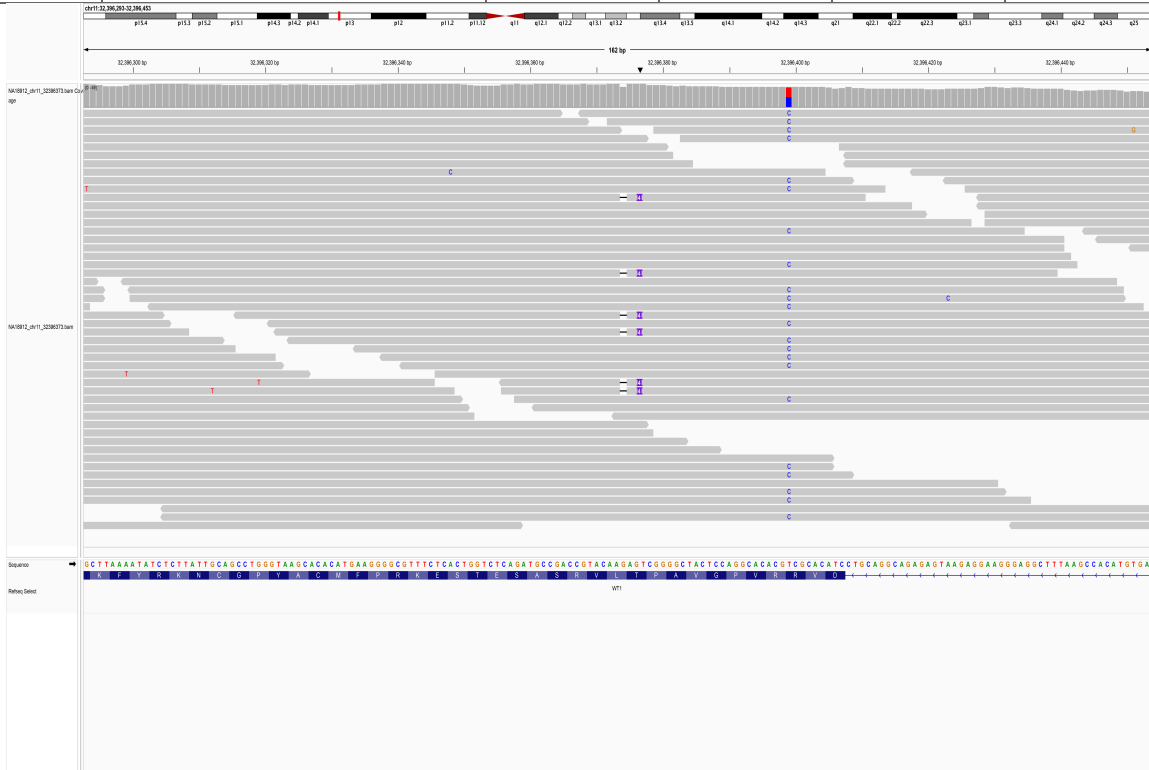

Reference:

1. Jaiswal, S., Natarajan, P., Silver, A.J., Gibson, C.J., Bick, A.G., Shvartz, E., McConkey, M., Gupta, N., Gabriel, S., Ardissino, D., et al. (2017). Clonal Hematopoiesis and Risk of Atherosclerotic Cardiovascular Disease. *N. Engl. J. Med.* 377, 111–121.
