# Supplementary material
Source: Research Square preprint supplement (doi:10.21203/rs.3.rs-9041912/v1)
Supplement: Supplementary file 3 [file c07fe01ad6629db82bde0651.pdf]

## **Additional File 2**

### **CHIP whitelist mutations identified and confirmed in the replication cohort.**

Listed are 476 CHIP whitelist mutations identified in 451 persons of the CYN16K cohort (N = 16,151). CHIP mutations identified as per the criteria used in Jaiswal et al.<sup>1</sup> Each CHIP variant has been manually reviewed independently by two researchers, by Integrative Genomics Viewer with reads support (related to **Table S5**).

## Table of Contents

|       |                                               |    |
|-------|-----------------------------------------------|----|
| 1.    | <i>ASXL1</i> .....                            | 12 |
| 1.1.  | chr20_32433339_G/T.....                       | 12 |
| 1.2.  | chr20_32433447_C/T.....                       | 13 |
| 1.3.  | chr20_32433750_G/T.....                       | 14 |
| 1.4.  | chr20_32434599_CACCACTGCCATAGAGAGGCGGC/-..... | 15 |
| 1.5.  | chr20_32434747_G/T.....                       | 17 |
| 1.6.  | chr20_32435014_C/T.....                       | 18 |
| 1.7.  | chr20_32435034_T/-.....                       | 19 |
| 1.8.  | chr20_32435036_T/G.....                       | 20 |
| 1.9.  | chr20_32435050_C/T.....                       | 21 |
| 1.10. | chr20_32435109_G/-.....                       | 22 |
| 1.11. | chr20_32435133_C/-.....                       | 23 |
| 1.12. | chr20_32435267_C/A.....                       | 24 |
| 1.13. | chr20_32435491_G/T.....                       | 25 |
| 1.14. | chr20_32435592_G/A.....                       | 26 |
| 1.15. | chr20_32435665_TCAACGGAGAC/-.....             | 27 |
| 1.16. | chr20_32435696_-/A.....                       | 28 |
| 1.17. | chr20_32436442_A/T.....                       | 29 |
| 1.18. | chr20_32436449_C/-.....                       | 30 |
| 2.    | <i>BCOR</i> .....                             | 31 |
| 2.1.  | chrX_40064489_GGGAGGCTCG/-.....               | 31 |
| 3.    | <i>BCORL1</i> .....                           | 32 |
| 3.1.  | chrX_130028814_C/T.....                       | 32 |
| 4.    | <i>BRCC3</i> .....                            | 33 |
| 4.1.  | chrX_155090840_G/A.....                       | 33 |
| 5.    | <i>CBL</i> .....                              | 34 |
| 5.1.  | chr11_119278618_G/A.....                      | 34 |
| 5.2.  | chr11_119297001_C/G.....                      | 35 |
| 5.3.  | chr11_119297007_G/T.....                      | 36 |
| 5.4.  | chr11_119298457_T/G.....                      | 37 |
| 5.5.  | chr11_119299593_G/A.....                      | 38 |
| 5.6.  | chr11_119299599_G/C.....                      | 39 |
| 6.    | <i>CBLB</i> .....                             | 40 |
| 6.1.  | chr3_105659118_G/A.....                       | 40 |
| 6.2.  | chr3_105702125_C/G.....                       | 41 |
| 6.3.  | chr3_105702297_G/T.....                       | 42 |
| 6.4.  | chr3_105702441_T/C.....                       | 43 |
| 7.    | <i>CREBBP</i> .....                           | 44 |
| 7.1.  | chr16_3781258_G/-.....                        | 44 |
| 8.    | <i>CTCF</i> .....                             | 45 |

|        |                                      |    |
|--------|--------------------------------------|----|
| 8.1.   | chr16_67636801_GCGGAGAG/-            | 45 |
| 9.     | <i>CUX1</i>                          | 46 |
| 9.1.   | chr7_102111753_AGGTTCAGAGCCTACAAAC/- | 46 |
| 9.2.   | chr7_102196778_AAGTC/-               | 47 |
| 9.3.   | chr7_102248646_CCGCCGCCCTCGGGGA/-    | 48 |
| 10.    | <i>DNMT3A</i>                        | 49 |
| 10.1.  | chr2_25234299_-/C                    | 49 |
| 10.2.  | chr2_25234307_G/A                    | 50 |
| 10.3.  | chr2_25234367_G/A                    | 52 |
| 10.4.  | chr2_25234373_C/T                    | 53 |
| 10.5.  | chr2_25234374_G/A                    | 62 |
| 10.6.  | chr2_25234374_G/A/T                  | 65 |
| 10.7.  | chr2_25234374_G/T/A                  | 66 |
| 10.8.  | chr2_25234422_T/C                    | 67 |
| 10.9.  | chr2_25235711_C/A                    | 68 |
| 10.10. | chr2_25235726_A/G                    | 69 |
| 10.11. | chr2_25235755_C/-                    | 70 |
| 10.12. | chr2_25235779_G/-                    | 71 |
| 10.13. | chr2_25235783_T/G                    | 72 |
| 10.14. | chr2_25235821_TGAACTAGA/-            | 73 |
| 10.15. | chr2_25235822_G/-                    | 74 |
| 10.16. | chr2_25235826_C/T                    | 75 |
| 10.17. | chr2_25235827_T/C                    | 76 |
| 10.18. | chr2_25236935_CC/AT                  | 78 |
| 10.19. | chr2_25236935_C/T                    | 79 |
| 10.20. | chr2_25236937_T/C                    | 80 |
| 10.21. | chr2_25236960_-/A                    | 81 |
| 10.22. | chr2_25236973_C/-                    | 82 |
| 10.23. | chr2_25239128_A/G                    | 83 |
| 10.24. | chr2_25239131_G/-                    | 84 |
| 10.25. | chr2_25239140_G/-                    | 85 |
| 10.26. | chr2_25239143_G/A                    | 86 |
| 10.27. | chr2_25239146_GTTA/-                 | 87 |
| 10.28. | chr2_25239151_C/T                    | 88 |
| 10.29. | chr2_25239154_C/T                    | 89 |
| 10.30. | chr2_25239157_-/T                    | 90 |
| 10.31. | chr2_25239159_G/T                    | 91 |
| 10.32. | chr2_25239199_A/G                    | 92 |
| 10.33. | chr2_25239216_C/A                    | 93 |
| 10.34. | chr2_25239217_T/C                    | 94 |
| 10.35. | chr2_25240301_C/T                    | 95 |

|        |                                        |     |
|--------|----------------------------------------|-----|
| 10.36. | chr2_25240303_T/C.....                 | 96  |
| 10.37. | chr2_25240304_C/T.....                 | 97  |
| 10.38. | chr2_25240307_A/-.....                 | 98  |
| 10.39. | chr2_25240312_C/T.....                 | 99  |
| 10.40. | chr2_25240313_G/A.....                 | 100 |
| 10.41. | chr2_25240315_G/A.....                 | 102 |
| 10.42. | chr2_25240315_G/T.....                 | 104 |
| 10.43. | chr2_25240318_-/T.....                 | 105 |
| 10.44. | chr2_25240320_TCCC/-.....              | 106 |
| 10.45. | chr2_25240326_TTGT/-.....              | 107 |
| 10.46. | chr2_25240331_ACTAA/-.....             | 108 |
| 10.47. | chr2_25240338_C/-.....                 | 109 |
| 10.48. | chr2_25240360_A/G.....                 | 110 |
| 10.49. | chr2_25240367_A/G.....                 | 112 |
| 10.50. | chr2_25240368_G/T.....                 | 113 |
| 10.51. | chr2_25240379_G/A.....                 | 114 |
| 10.52. | chr2_25240388_C/A.....                 | 116 |
| 10.53. | chr2_25240392_T/-.....                 | 117 |
| 10.54. | chr2_25240417_C/T.....                 | 118 |
| 10.55. | chr2_25240418_G/A.....                 | 120 |
| 10.56. | chr2_25240420_T/C.....                 | 123 |
| 10.57. | chr2_25240420_T/G.....                 | 124 |
| 10.58. | chr2_25240423_A/C.....                 | 125 |
| 10.59. | chr2_25240427_AAAGAAGAGCCGGCCAG/-..... | 126 |
| 10.60. | chr2_25240428_AAG/-.....               | 127 |
| 10.61. | chr2_25240429_A/G.....                 | 129 |
| 10.62. | chr2_25240430_GAAGAGCC/-.....          | 130 |
| 10.63. | chr2_25240639_C/T.....                 | 131 |
| 10.64. | chr2_25240666_A/T.....                 | 132 |
| 10.65. | chr2_25240667_C/A.....                 | 133 |
| 10.66. | chr2_25240667_C/T.....                 | 134 |
| 10.67. | chr2_25240699_A/G.....                 | 135 |
| 10.68. | chr2_25240720_C/T.....                 | 136 |
| 10.69. | chr2_25240723_C/-.....                 | 137 |
| 10.70. | chr2_25240732_T/C.....                 | 138 |
| 10.71. | chr2_25241561_C/T.....                 | 140 |
| 10.72. | chr2_25241567_T/A.....                 | 141 |
| 10.73. | chr2_25241568_TG/-.....                | 142 |
| 10.74. | chr2_25241581_C/T.....                 | 143 |
| 10.75. | chr2_25241583_ACGTCCCCGACGTACA/-.....  | 144 |
| 10.76. | chr2_25241600_G/-.....                 | 145 |

|         |                                   |     |
|---------|-----------------------------------|-----|
| 10.77.  | chr2_25241612_G/A .....           | 146 |
| 10.78.  | chr2_25241636_G/- .....           | 147 |
| 10.79.  | chr2_25241668_C/T.....            | 148 |
| 10.80.  | chr2_25241675_C/T.....            | 149 |
| 10.81.  | chr2_25241708_C/A .....           | 150 |
| 10.82.  | chr2_25243907_-/T .....           | 151 |
| 10.83.  | chr2_25243915_-/T .....           | 152 |
| 10.84.  | chr2_25243921_G/A .....           | 153 |
| 10.85.  | chr2_25243927_-/A.....            | 154 |
| 10.86.  | chr2_25243930_C/T.....            | 155 |
| 10.87.  | chr2_25243931_G/A .....           | 157 |
| 10.88.  | chr2_25243931_G/C/A.....          | 158 |
| 10.89.  | chr2_25243938_T/- .....           | 159 |
| 10.90.  | chr2_25244190_G/A .....           | 160 |
| 10.91.  | chr2_25244204_C/T.....            | 161 |
| 10.92.  | chr2_25244214_G/A .....           | 162 |
| 10.93.  | chr2_25244230_G/C .....           | 163 |
| 10.94.  | chr2_25244263_C/G .....           | 164 |
| 10.95.  | chr2_25244265_A/C .....           | 165 |
| 10.96.  | chr2_25244265_A/T.....            | 166 |
| 10.97.  | chr2_25244285_CCTGGGCAGCC/- ..... | 167 |
| 10.98.  | chr2_25244285_C/-.....            | 168 |
| 10.99.  | chr2_25244316_CA/- .....          | 169 |
| 10.100. | chr2_25244559_C/T.....            | 170 |
| 10.101. | chr2_25244567_A/G .....           | 171 |
| 10.102. | chr2_25244580_C/A .....           | 172 |
| 10.103. | chr2_25244633_CA/- .....          | 173 |
| 10.104. | chr2_25244640_C/A .....           | 174 |
| 10.105. | chr2_25244654_T/C.....            | 175 |
| 10.106. | chr2_25245264_G/A .....           | 176 |
| 10.107. | chr2_25245266_A/-.....            | 177 |
| 10.108. | chr2_25245295_A/-.....            | 178 |
| 10.109. | chr2_25246160_C/A .....           | 179 |
| 10.110. | chr2_25246184_C/A .....           | 180 |
| 10.111. | chr2_25246245_G/T .....           | 181 |
| 10.112. | chr2_25246293_G/C .....           | 182 |
| 10.113. | chr2_25246293_G/T .....           | 183 |
| 10.114. | chr2_25246618_A/G .....           | 184 |
| 10.115. | chr2_25246619_C/T.....            | 185 |
| 10.116. | chr2_25246632_CC/AT.....          | 186 |
| 10.117. | chr2_25246656_G/A .....           | 187 |

|         |                                                                    |     |
|---------|--------------------------------------------------------------------|-----|
| 10.118. | chr2_25246673_C/T.....                                             | 188 |
| 10.119. | chr2_25246744_G/-.....                                             | 189 |
| 10.120. | chr2_25246764_G/A.....                                             | 190 |
| 10.121. | chr2_25247063_G/C.....                                             | 191 |
| 10.122. | chr2_25247070_G/A.....                                             | 192 |
| 10.123. | chr2_25247076_C/G.....                                             | 193 |
| 10.124. | chr2_25247078_G/T.....                                             | 194 |
| 10.125. | chr2_25247121_A/-.....                                             | 195 |
| 10.126. | chr2_25247150_ACAC/-.....                                          | 196 |
| 10.127. | chr2_25247602_T/A.....                                             | 197 |
| 10.128. | chr2_25247625_C/T.....                                             | 198 |
| 10.129. | chr2_25247628_C/T.....                                             | 199 |
| 10.130. | chr2_25247628_C/A.....                                             | 201 |
| 10.131. | chr2_25247629_G/A.....                                             | 202 |
| 10.132. | chr2_25247647_G/A.....                                             | 204 |
| 10.133. | chr2_25247666_C/T.....                                             | 206 |
| 10.134. | chr2_25247690_C/T.....                                             | 207 |
| 10.135. | chr2_25248093_C/-.....                                             | 208 |
| 10.136. | chr2_25248132_GG/-.....                                            | 209 |
| 10.137. | chr2_25248157_G/-.....                                             | 210 |
| 10.138. | chr2_25248201_G/A.....                                             | 211 |
| 10.139. | chr2_25248220_ATTCTGCAATGACCTT/-.....                              | 212 |
| 10.140. | chr2_25274917_GCCCAGGCCAGAAGGCGCCTCA/-.....                        | 213 |
| 11.     | <i>EED</i> .....                                                   | 214 |
| 11.1.   | chr11_86257597_G/A.....                                            | 214 |
| 12.     | <i>FLT3</i> .....                                                  | 215 |
| 12.1.   | chr13_28004078_G/A.....                                            | 215 |
| 13.     | <i>GATA1</i> .....                                                 | 216 |
| 13.1.   | chrX_48791231_T/A.....                                             | 216 |
| 14.     | <i>GATA3</i> .....                                                 | 217 |
| 14.1.   | chr10_8055884_CGACCCACCACGGTGAGTGCGCCCGGGGTGCCGGGGCTCCC<br>G/- 217 |     |
| 15.     | <i>GNAS</i> .....                                                  | 218 |
| 15.1.   | chr20_58909365_C/T.....                                            | 218 |
| 15.2.   | chr20_58909366_G/A.....                                            | 220 |
| 16.     | <i>GNB1</i> .....                                                  | 224 |
| 16.1.   | chr1_1815789_T/A.....                                              | 224 |
| 16.2.   | chr1_1815790_T/C.....                                              | 225 |
| 17.     | <i>JAK2</i> .....                                                  | 229 |
| 17.1.   | chr9_5073770_G/T.....                                              | 229 |

|       |                                                           |     |
|-------|-----------------------------------------------------------|-----|
| 18.   | <i>KDM6A</i> .....                                        | 234 |
| 18.1. | chrX_44873709_CAGGTACG/- .....                            | 234 |
| 18.2. | chrX_45051700_TTCTTTAGAGGAAATATCAT/- .....                | 235 |
| 18.3. | chrX_45085873_AAAAT/- .....                               | 236 |
| 19.   | <i>KMT2A</i> .....                                        | 237 |
| 19.1. | chr11_118473113_C/T.....                                  | 237 |
| 19.2. | chr11_118472981_C/T.....                                  | 238 |
| 19.3. | chr11_118482432_AGCAAAC/-.....                            | 239 |
| 19.4. | chr11_118501780_C/G .....                                 | 240 |
| 19.5. | chr11_118503327_C/T.....                                  | 241 |
| 19.6. | chr11_118504291_T/A.....                                  | 242 |
| 19.7. | chr11_118506409_C/G .....                                 | 243 |
| 20.   | <i>KMT2D</i> .....                                        | 244 |
| 20.1. | chr12_49028035_GCTCAGTGCCT/- .....                        | 244 |
| 20.2. | chr12_49032531_ATTG/-.....                                | 250 |
| 20.3. | chr12_49033620_G/- .....                                  | 251 |
| 20.4. | chr12_49039304_-/CCATCCTGGGG.....                         | 252 |
| 20.5. | chr12_49040152_G/A .....                                  | 253 |
| 20.6. | chr12_49041103_CTGGC/- .....                              | 254 |
| 20.7. | chr12_49043126_TGCCTGGCTTCTCAGGGTCACTGGGCACTGGGGA/- ..... | 255 |
| 20.8. | chr12_49054394_C/T.....                                   | 256 |
| 21.   | <i>KRAS</i> .....                                         | 257 |
| 21.1. | chr12_25245350_C/A .....                                  | 257 |
| 22.   | <i>MPL</i> .....                                          | 258 |
| 22.1. | chr1_43352639_G/A .....                                   | 258 |
| 23.   | <i>NF1</i> .....                                          | 259 |
| 23.1. | chr17_31225195_-/AATTACTACGTACA .....                     | 259 |
| 23.2. | chr17_31261810_G/A .....                                  | 260 |
| 23.3. | chr17_31343098_-/T .....                                  | 261 |
| 24.   | <i>NRAS</i> .....                                         | 262 |
| 24.1. | chr1_114716127_C/T.....                                   | 262 |
| 25.   | <i>PDS5B</i> .....                                        | 263 |
| 25.1. | chr13_32648775_G/A .....                                  | 263 |
| 25.2. | chr13_32688526_-/TGCT .....                               | 264 |
| 26.   | <i>PHIP</i> .....                                         | 265 |
| 26.1. | chr6_78965944_C/T.....                                    | 265 |
| 26.2. | chr6_79042911_G/A .....                                   | 266 |
| 27.   | <i>PPM1D</i> .....                                        | 267 |
| 27.1. | chr17_60663015_G/A .....                                  | 267 |
| 27.2. | chr17_60663015_GC/AT .....                                | 268 |
| 27.3. | chr17_60663092_C/G .....                                  | 269 |

|        |                                                         |     |
|--------|---------------------------------------------------------|-----|
| 27.4.  | chr17_60663169_G/T .....                                | 270 |
| 27.5.  | chr17_60663181_C/-.....                                 | 271 |
| 27.6.  | chr17_60663200_T/-.....                                 | 272 |
| 27.7.  | chr17_60663290_G/T .....                                | 273 |
| 27.8.  | chr17_60663333_T/-.....                                 | 274 |
| 27.9.  | chr17_60663352_A/-.....                                 | 275 |
| 27.10. | chr17_60663388_C/T.....                                 | 276 |
| 27.11. | chr17_60663448_C/T.....                                 | 277 |
| 28.    | <i>PRPF8</i> .....                                      | 278 |
| 28.1.  | chr17_1659994_T/A.....                                  | 278 |
| 28.2.  | chr17_1659995_C/T.....                                  | 279 |
| 29.    | <i>SETD2</i> .....                                      | 280 |
| 29.1.  | chr3_47086252_C/T.....                                  | 280 |
| 29.2.  | chr3_47106062_G/A .....                                 | 281 |
| 29.3.  | chr3_47120981_G/A .....                                 | 282 |
| 29.4.  | chr3_47121143_C/-.....                                  | 283 |
| 30.    | <i>SF1</i> .....                                        | 284 |
| 30.1.  | chr11_64765837_GTGGGGGAGCTGGA/- .....                   | 284 |
| 30.2.  | chr11_64765922_AGGCGGAGGAGGA/-.....                     | 285 |
| 30.3.  | chr11_64765929_GGAGGAGGGGGCG/-.....                     | 286 |
| 31.    | <i>SF3A1</i> .....                                      | 287 |
| 31.1.  | chr22_30334590_TGTCTACTTCTTCCTCCCG/-.....               | 287 |
| 32.    | <i>SF3B1</i> .....                                      | 288 |
| 32.1.  | chr2_197402110_T/C.....                                 | 288 |
| 32.2.  | chr2_197402635_C/G .....                                | 290 |
| 33.    | <i>STAG2</i> .....                                      | 291 |
| 33.1.  | chrX_124063866_C/T .....                                | 291 |
| 34.    | <i>TET2</i> .....                                       | 292 |
| 34.1.  | chr4_105233896_G/A .....                                | 292 |
| 34.2.  | chr4_105234173_TT/-.....                                | 293 |
| 34.3.  | chr4_105234229_C/-.....                                 | 294 |
| 34.4.  | chr4_105234423_-/A.....                                 | 295 |
| 34.5.  | chr4_105234711_C/-.....                                 | 296 |
| 34.6.  | chr4_105234728_T/A.....                                 | 297 |
| 34.7.  | chr4_105234771_CACAGACCTCTAA/- .....                    | 298 |
| 34.8.  | chr4_105234877_T/-.....                                 | 299 |
| 34.9.  | chr4_105234902_C/-.....                                 | 300 |
| 34.10. | chr4_105235003_C/G .....                                | 301 |
| 34.11. | chr4_105235059_C/T.....                                 | 302 |
| 34.12. | chr4_105235352_A/-.....                                 | 303 |
| 34.13. | chr4_105235382_CAGAATAATTGTGTGAACAGGAATGACATACA/- ..... | 304 |

|        |                                  |     |
|--------|----------------------------------|-----|
| 34.14. | chr4_105235572_C/T.....          | 305 |
| 34.15. | chr4_105235662_C/T.....          | 306 |
| 34.16. | chr4_105235718_CAACC/-.....      | 307 |
| 34.17. | chr4_105235751_-/C.....          | 308 |
| 34.18. | chr4_105235912_C/G.....          | 309 |
| 34.19. | chr4_105235912_C/A.....          | 310 |
| 34.20. | chr4_105236043_C/T.....          | 311 |
| 34.21. | chr4_105236075_C/-.....          | 312 |
| 34.22. | chr4_105236105_TA/AT.....        | 313 |
| 34.23. | chr4_105236218_TT/-.....         | 314 |
| 34.24. | chr4_105236323_A/-.....          | 315 |
| 34.25. | chr4_105236334_G/T.....          | 316 |
| 34.26. | chr4_105236358_-/C.....          | 317 |
| 34.27. | chr4_105236358_T/-.....          | 318 |
| 34.28. | chr4_105236416_C/G.....          | 319 |
| 34.29. | chr4_105236431_-/T.....          | 320 |
| 34.30. | chr4_105236527_G/-.....          | 321 |
| 34.31. | chr4_105236564_AAGCAAGATC/-..... | 322 |
| 34.32. | chr4_105236588_C/A.....          | 323 |
| 34.33. | chr4_105236769_A/-.....          | 324 |
| 34.34. | chr4_105236781_C/T.....          | 325 |
| 34.35. | chr4_105237000_C/T.....          | 326 |
| 34.36. | chr4_105237091_C/A.....          | 327 |
| 34.37. | chr4_105237118_C/G.....          | 328 |
| 34.38. | chr4_105237189_C/T.....          | 329 |
| 34.39. | chr4_105237205_C/A.....          | 330 |
| 34.40. | chr4_105237284_C/-.....          | 331 |
| 34.41. | chr4_105237353_-/T.....          | 332 |
| 34.42. | chr4_105241341_A/-.....          | 333 |
| 34.43. | chr4_105241379_CTAGGAG/-.....    | 334 |
| 34.44. | chr4_105241399_T/A.....          | 335 |
| 34.45. | chr4_105242838_G/A.....          | 336 |
| 34.46. | chr4_105242911_G/A.....          | 337 |
| 34.47. | chr4_105242914_C/G.....          | 338 |
| 34.48. | chr4_105243569_G/A.....          | 339 |
| 34.49. | chr4_105243574_T/A.....          | 340 |
| 34.50. | chr4_105243616_G/A.....          | 341 |
| 34.51. | chr4_105243621_C/T.....          | 342 |
| 34.52. | chr4_105243622_G/A.....          | 343 |
| 34.53. | chr4_105243637_G/A.....          | 344 |
| 34.54. | chr4_105243682_C/-.....          | 345 |

|        |                                         |     |
|--------|-----------------------------------------|-----|
| 34.55. | chr4_105243706_T/C.....                 | 346 |
| 34.56. | chr4_105243757_G/A.....                 | 347 |
| 34.57. | chr4_105243759_C/T.....                 | 348 |
| 34.58. | chr4_105243760_G/A.....                 | 349 |
| 34.59. | chr4_105243772_A/G.....                 | 350 |
| 34.60. | chr4_105259628_C/G.....                 | 351 |
| 34.61. | chr4_105259660_G/A.....                 | 352 |
| 34.62. | chr4_105259672_C/G.....                 | 353 |
| 34.63. | chr4_105259705_G/A.....                 | 354 |
| 34.64. | chr4_105259717_C/A.....                 | 355 |
| 34.65. | chr4_105261757_A/T.....                 | 356 |
| 34.66. | chr4_105261769_T/C.....                 | 357 |
| 34.67. | chr4_105261769_T/A.....                 | 358 |
| 34.68. | chr4_105261778_T/-.....                 | 359 |
| 34.69. | chr4_105261815_T/A.....                 | 360 |
| 34.70. | chr4_105261823_-/T.....                 | 361 |
| 34.71. | chr4_105269619_G/A.....                 | 362 |
| 34.72. | chr4_105269623_CAGAGCACCAGAGTGCC/-..... | 363 |
| 34.73. | chr4_105269640_C/T.....                 | 364 |
| 34.74. | chr4_105269662_G/A.....                 | 365 |
| 34.75. | chr4_105269671_C/T.....                 | 366 |
| 34.76. | chr4_105269680_C/T.....                 | 367 |
| 34.77. | chr4_105269694_TC/-.....                | 368 |
| 34.78. | chr4_105272614_-/G.....                 | 369 |
| 34.79. | chr4_105272629_C/G.....                 | 370 |
| 34.80. | chr4_105272634_T/C.....                 | 371 |
| 34.81. | chr4_105272693_-/A.....                 | 372 |
| 34.82. | chr4_105272707_-/T.....                 | 373 |
| 34.83. | chr4_105272774_C/T.....                 | 374 |
| 34.84. | chr4_105275131_C/T.....                 | 375 |
| 34.85. | chr4_105275146_C/T.....                 | 376 |
| 34.86. | chr4_105275177_T/-.....                 | 377 |
| 34.87. | chr4_105275189_-/A.....                 | 378 |
| 34.88. | chr4_105275252_C/-.....                 | 379 |
| 34.89. | chr4_105275267_C/A.....                 | 380 |
| 34.90. | chr4_105275448_GGTTCCCTATTCTCCCC/-..... | 381 |
| 34.91. | chr4_105275510_GTCTAAGCTCA/-.....       | 382 |
| 34.92. | chr4_105275758_ACTATAAAAAT/-.....       | 383 |
| 34.93. | chr4_105276010_C/T.....                 | 384 |
| 34.94. | chr4_105276088_-/G.....                 | 385 |
| 34.95. | chr4_105276116_G/A.....                 | 386 |

|         |                                                  |     |
|---------|--------------------------------------------------|-----|
| 34.96.  | chr4_105276119_C/G .....                         | 387 |
| 34.97.  | chr4_105276131_A/C .....                         | 388 |
| 34.98.  | chr4_105276160_A/G .....                         | 389 |
| 34.99.  | chr4_105276198_-/GA .....                        | 390 |
| 34.100. | chr4_105276221_A/G .....                         | 391 |
| 35.     | <i>TP53</i> .....                                | 392 |
| 35.1.   | chr17_7670581_GGCCAGGAAGGGGCTGAGGTCACTCA/- ..... | 392 |
| 35.2.   | chr17_7674220_C/T .....                          | 394 |
| 35.3.   | chr17_7674252_C/T .....                          | 395 |
| 35.4.   | chr17_7674885_C/T .....                          | 396 |
| 36.     | <i>ZRSR2</i> .....                               | 397 |
| 36.1.   | chrX_15790496_A/G .....                          | 397 |

# 1. ASXL1

## 1.1. chr20\_32433339\_G/T

| SampleID  | Variants (GRCh38)  | Ref_depth | Alt_depth | Gene  | Consequence |
|-----------|--------------------|-----------|-----------|-------|-------------|
| 110100879 | chr20_32433339_G/T | 28        | 10        | ASXL1 | stop_gained |

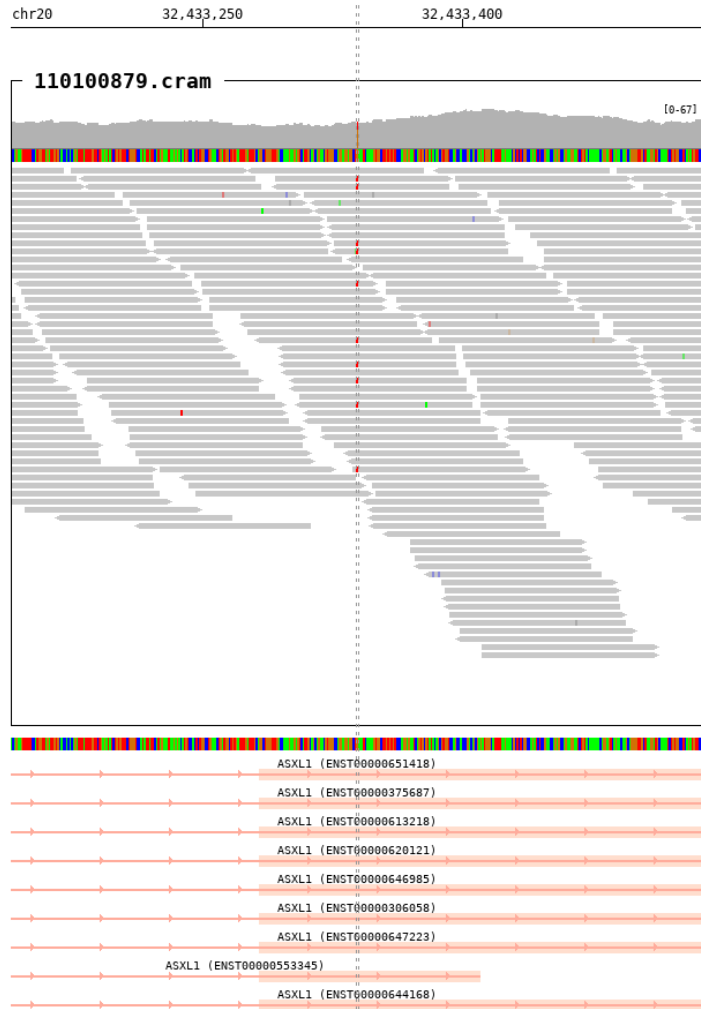

1.2. chr20\_32433447\_C/T

| SampleID | Variants (GRCh38)  | Ref_depth | Alt_depth | Gene  | Consequence |
|----------|--------------------|-----------|-----------|-------|-------------|
| 11540172 | chr20_32433447_C/T | 30        | 4         | ASXL1 | stop_gained |

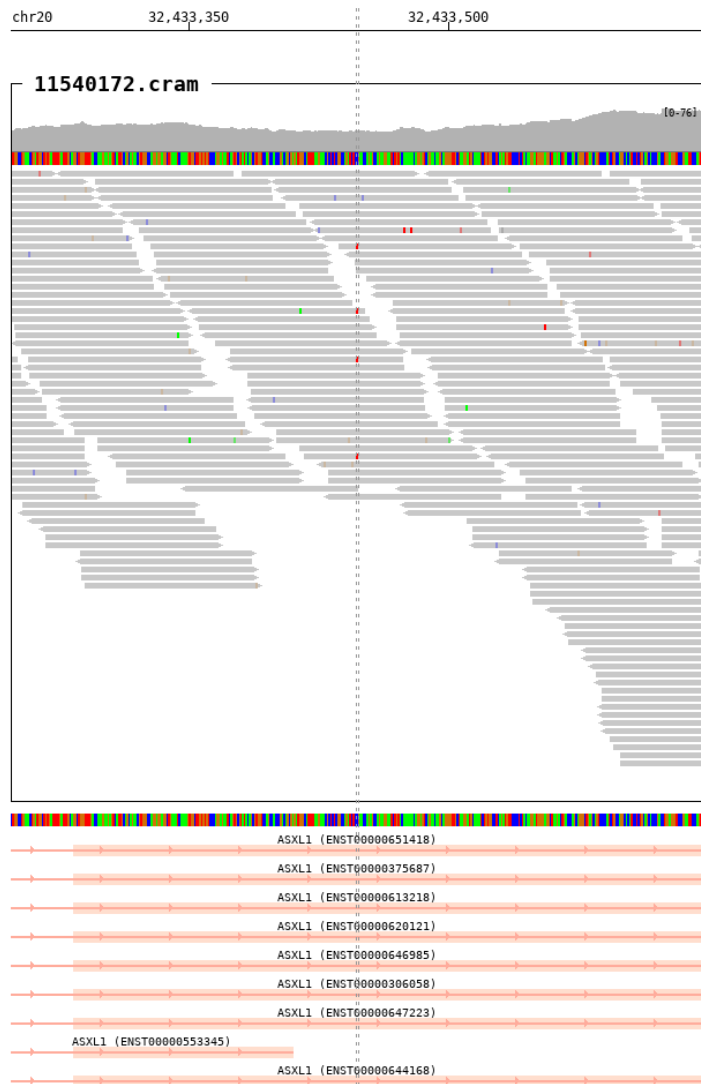

### 1.3. chr20\_32433750\_G/T

| SampleID | Variants (GRCh38)  | Ref_depth | Alt_depth | Gene  | Consequence |
|----------|--------------------|-----------|-----------|-------|-------------|
| 10302444 | chr20_32433750_G/T | 33        | 7         | ASXL1 | stop_gained |

chr20 32,433,650 32,433,800 32,43

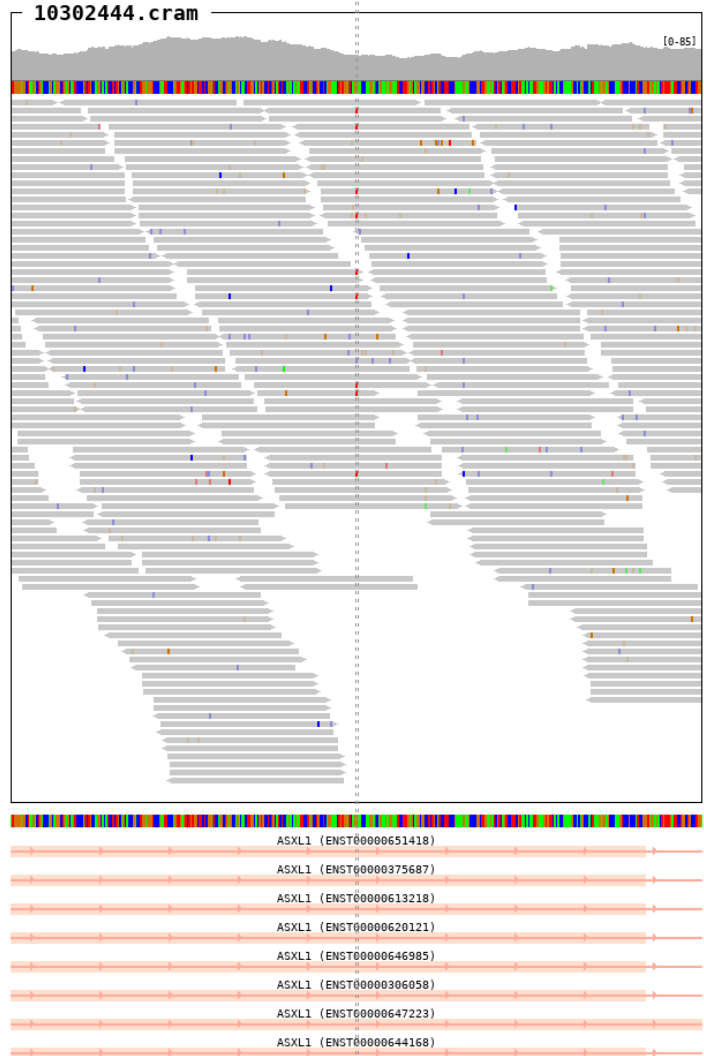

1.4. chr20\_32434599\_CACCACTGCCATAGAGAGGGCGGC/-

| SampleID  | Variants (GRCh38)                             | Ref_depth | Alt_depth | Gene  | Consequence        |
|-----------|-----------------------------------------------|-----------|-----------|-------|--------------------|
| 10010387  | chr20_32434599_CACCACTG<br>CCATAGAGAGGGCGGC/- | 39        | 4         | ASXL1 | frameshift_variant |
| 112403441 | chr20_32434599_CACCACTG<br>CCATAGAGAGGGCGGC/- | 48        | 5         | ASXL1 | frameshift_variant |
| 11311141  | chr20_32434599_CACCACTG<br>CCATAGAGAGGGCGGC/- | 31        | 4         | ASXL1 | frameshift_variant |
| 66924     | chr20_32434599_CACCACTG<br>CCATAGAGAGGGCGGC/- | 37        | 9         | ASXL1 | frameshift_variant |

chr20 32,434,450 32,434,600 32,434,750

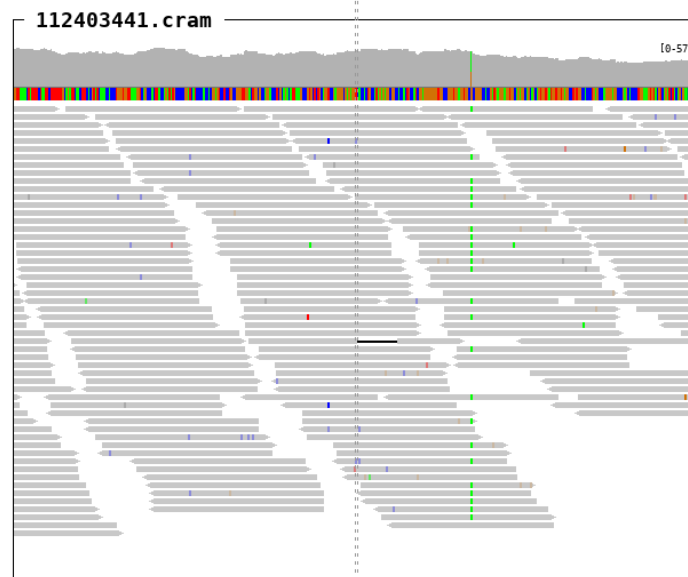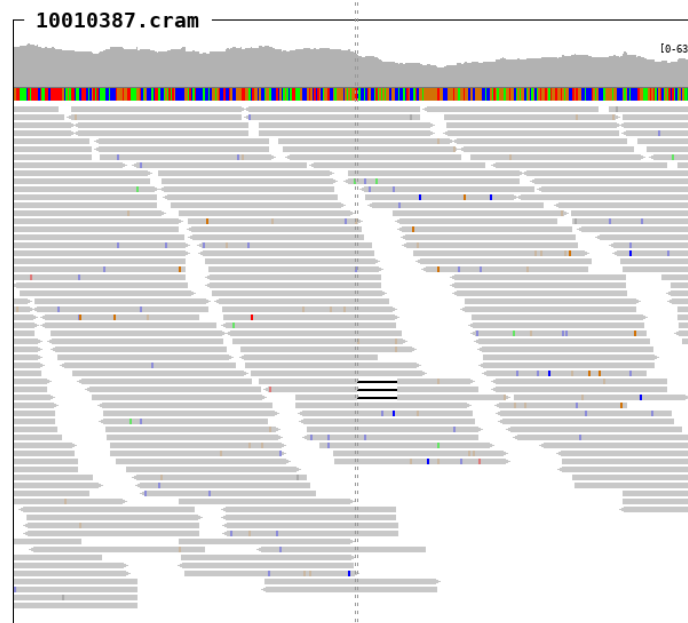

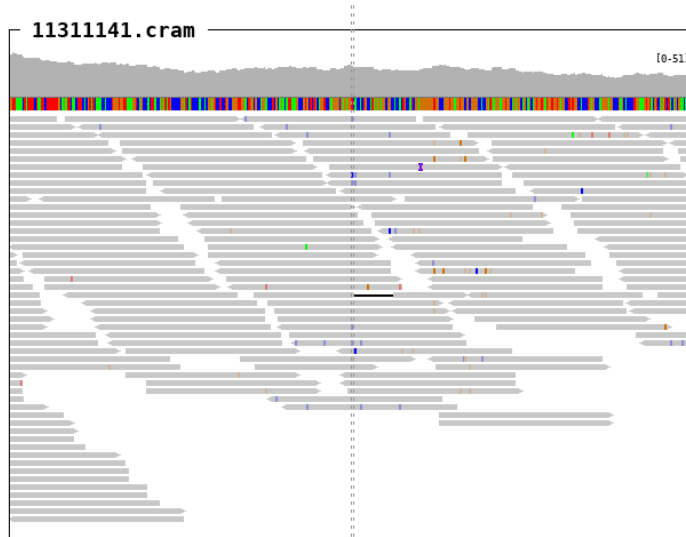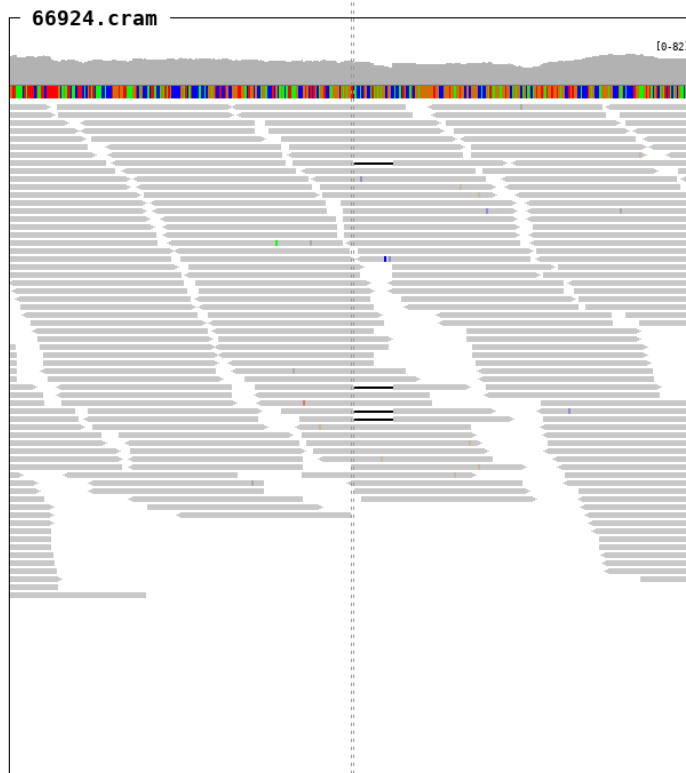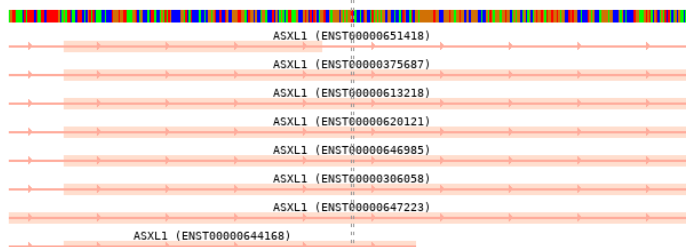

1.5. chr20\_32434747\_G/T

| SampleID  | Variants (GRCh38)  | Ref_depth | Alt_depth | Gene  | Consequence |
|-----------|--------------------|-----------|-----------|-------|-------------|
| 112301650 | chr20_32434747_G/T | 31        | 5         | ASXL1 | stop_gained |

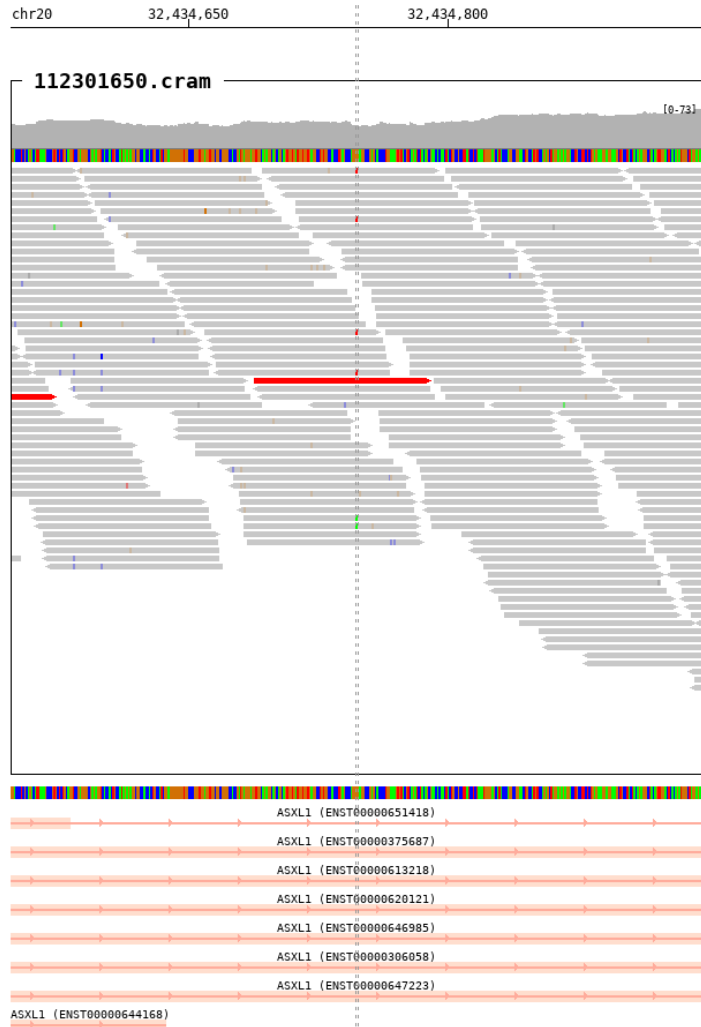

1.6. chr20\_32435014\_C/T

| SampleID  | Variants (GRCh38)  | Ref_depth | Alt_depth | Gene  | Consequence |
|-----------|--------------------|-----------|-----------|-------|-------------|
| 101102833 | chr20_32435014_C/T | 30        | 8         | ASXL1 | stop_gained |
| 10642369  | chr20_32435014_C/T | 47        | 6         | ASXL1 | stop_gained |

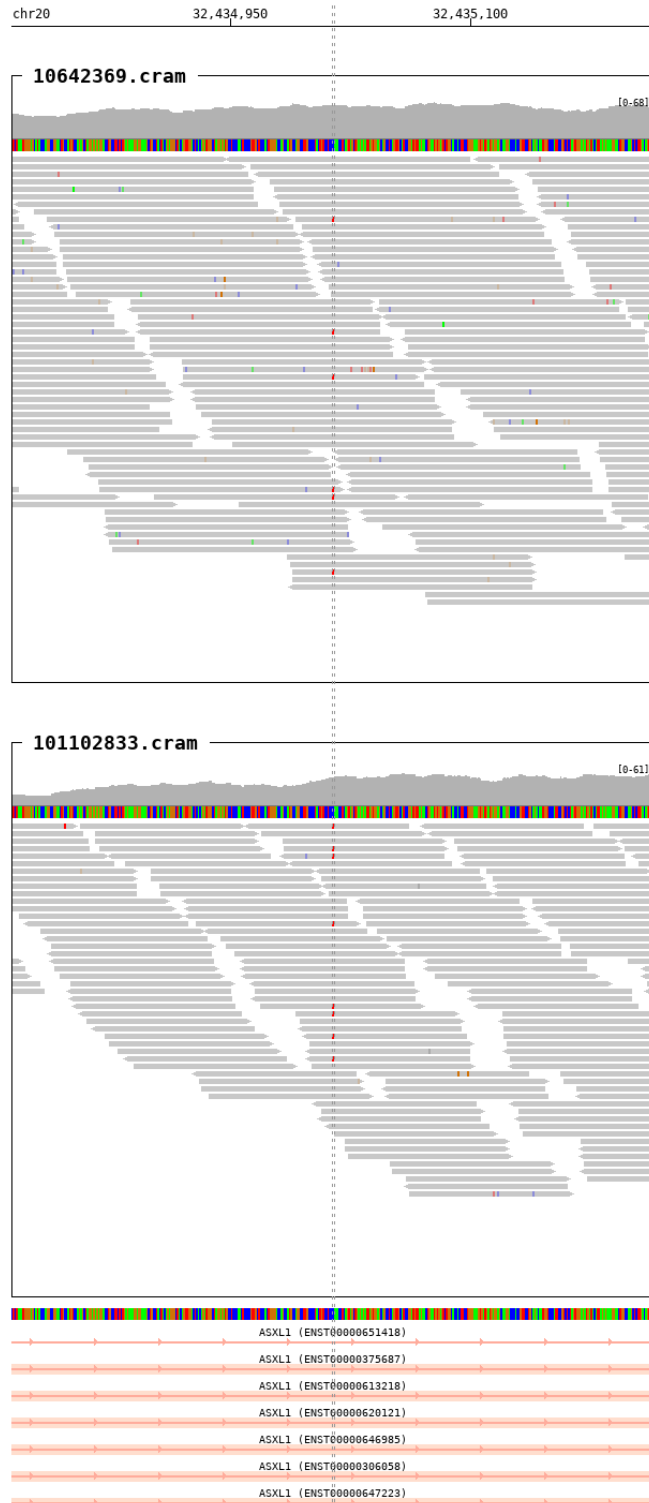

1.7. chr20\_32435034\_T/-

| SampleID  | Variants (GRCh38)  | Ref_depth | Alt_depth | Gene  | Consequence        |
|-----------|--------------------|-----------|-----------|-------|--------------------|
| 112300290 | chr20_32435034_T/- | 66        | 9         | ASXL1 | frameshift_variant |

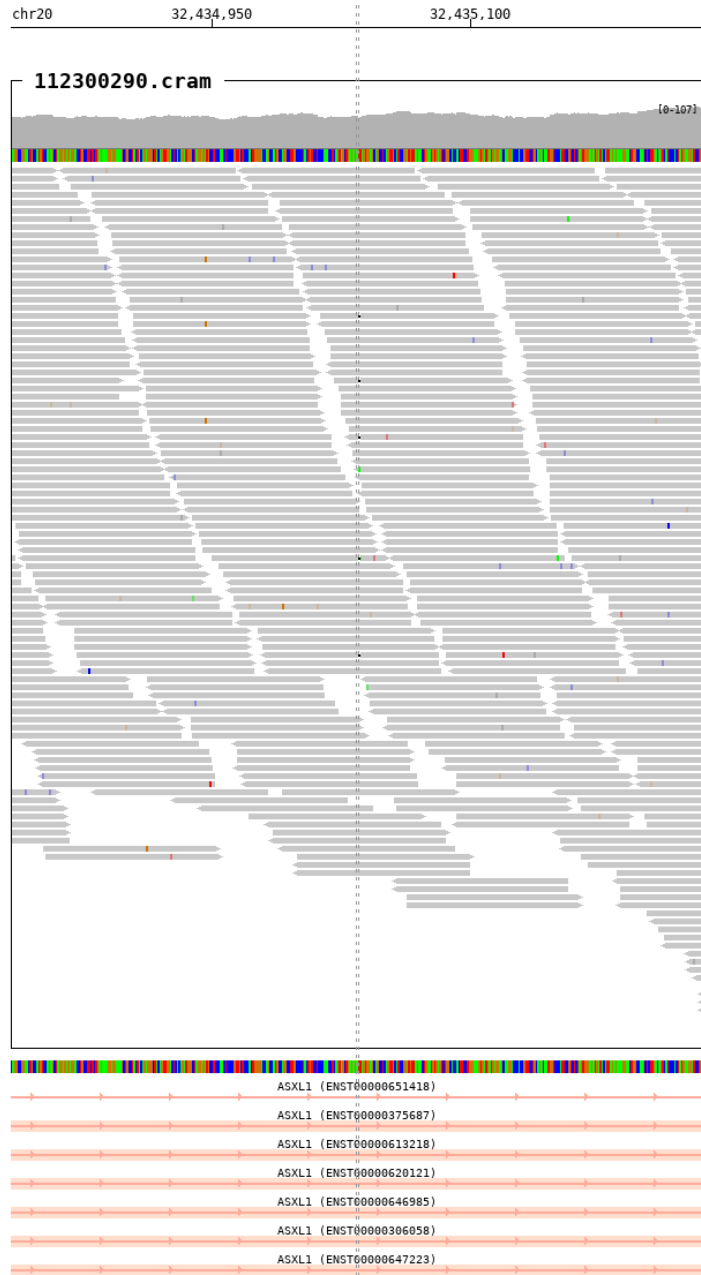

### 1.8. chr20\_32435036\_T/G

| SampleID | Variants (GRCh38)  | Ref_depth | Alt_depth | Gene  | Consequence |
|----------|--------------------|-----------|-----------|-------|-------------|
| 12390211 | chr20_32435036_T/G | 29        | 9         | ASXL1 | stop_gained |

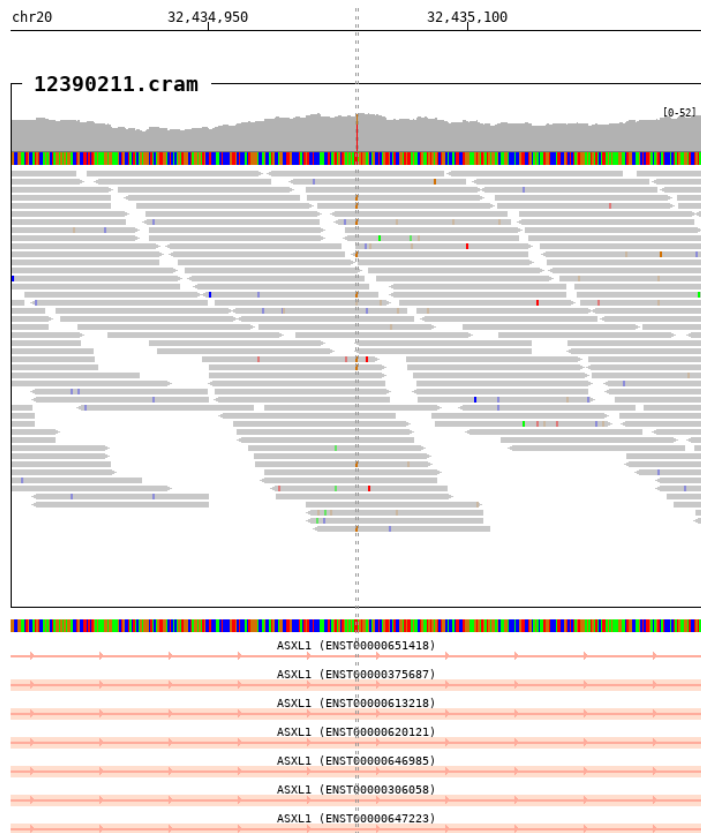

1.9. chr20\_32435050\_C/T

| SampleID  | Variants (GRCh38)  | Ref_depth | Alt_depth | Gene  | Consequence |
|-----------|--------------------|-----------|-----------|-------|-------------|
| 112302991 | chr20_32435050_C/T | 36        | 4         | ASXL1 | stop_gained |

chr20 32,434,950 32,435,100 32,43

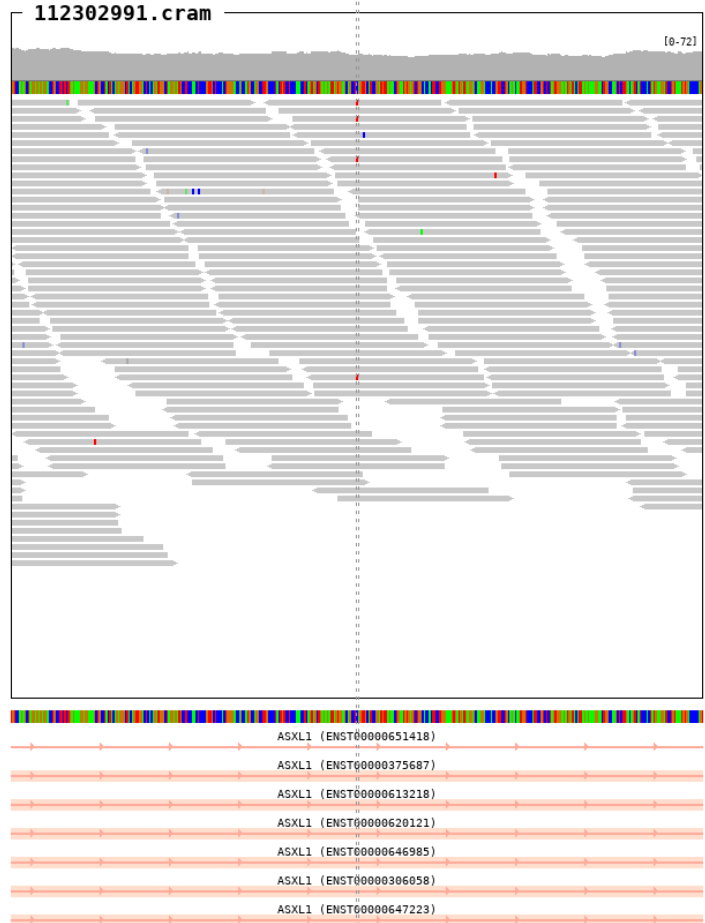

1.10. chr20\_32435109\_G/-

| SampleID  | Variants (GRCh38)  | Ref_depth | Alt_depth | Gene  | Consequence        |
|-----------|--------------------|-----------|-----------|-------|--------------------|
| 101606203 | chr20_32435109_G/- | 42        | 5         | ASXL1 | frameshift_variant |

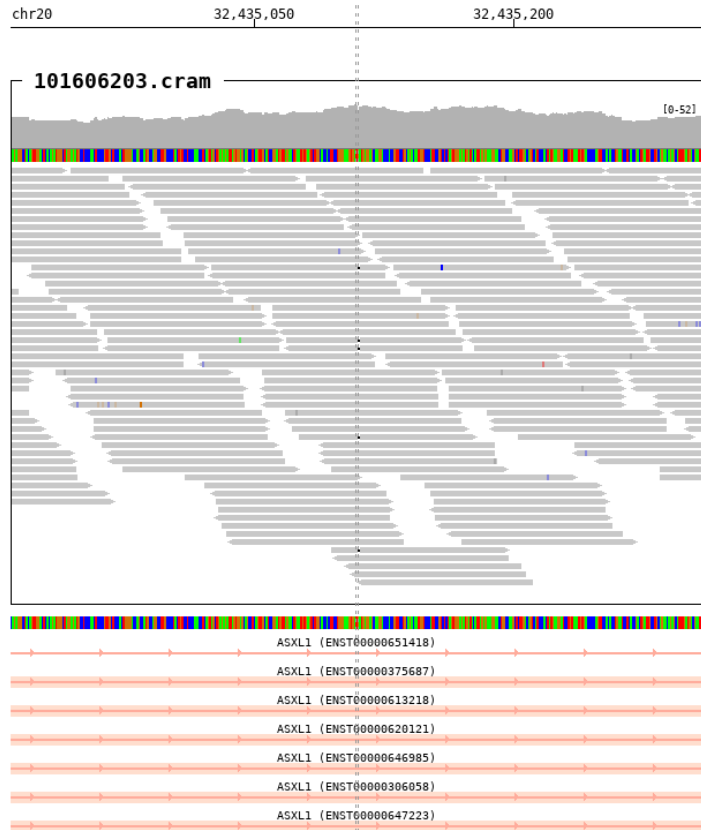

1.11. chr20\_32435133\_C/-

| SampleID  | Variants (GRCh38)  | Ref_depth | Alt_depth | Gene  | Consequence        |
|-----------|--------------------|-----------|-----------|-------|--------------------|
| 102102079 | chr20_32435133_C/- | 37        | 5         | ASXL1 | frameshift_variant |

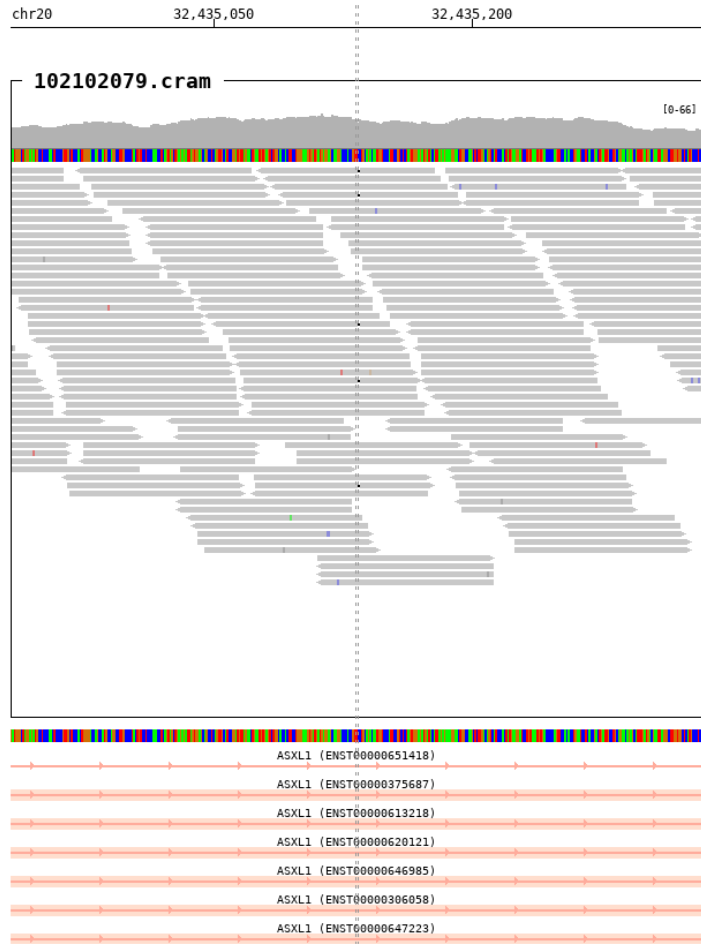

1.12. chr20\_32435267\_C/A

| SampleID | Variants (GRCh38)  | Ref_depth | Alt_depth | Gene  | Consequence |
|----------|--------------------|-----------|-----------|-------|-------------|
| 10312650 | chr20_32435267_C/A | 50        | 12        | ASXL1 | stop_gained |

chr20 32,435,150 32,435,300 32,435,450

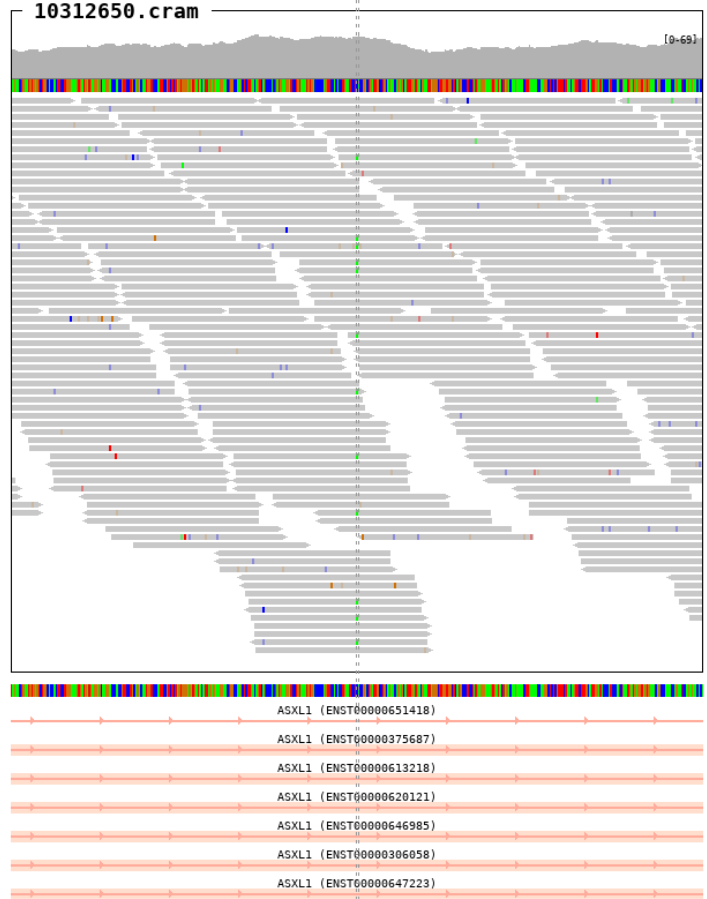

1.13. chr20\_32435491\_G/T

| SampleID | Variants (GRCh38)  | Ref_depth | Alt_depth | Gene  | Consequence |
|----------|--------------------|-----------|-----------|-------|-------------|
| 62459    | chr20_32435491_G/T | 37        | 3         | ASXL1 | stop_gained |

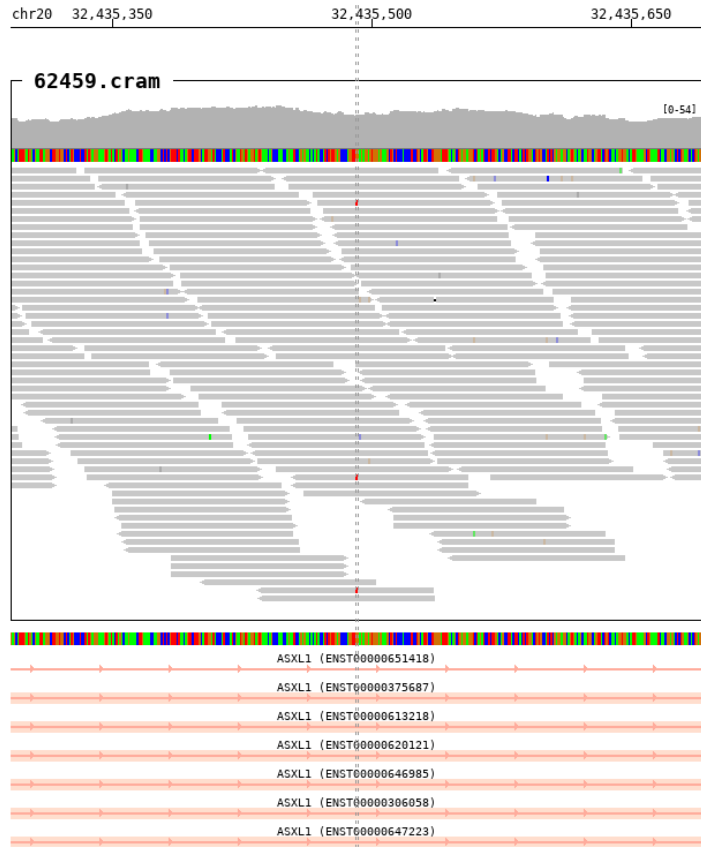

1.14. chr20\_32435592\_G/A

| SampleID | Variants (GRCh38)  | Ref_depth | Alt_depth | Gene  | Consequence |
|----------|--------------------|-----------|-----------|-------|-------------|
| 11311217 | chr20_32435592_G/A | 38        | 4         | ASXL1 | stop_gained |

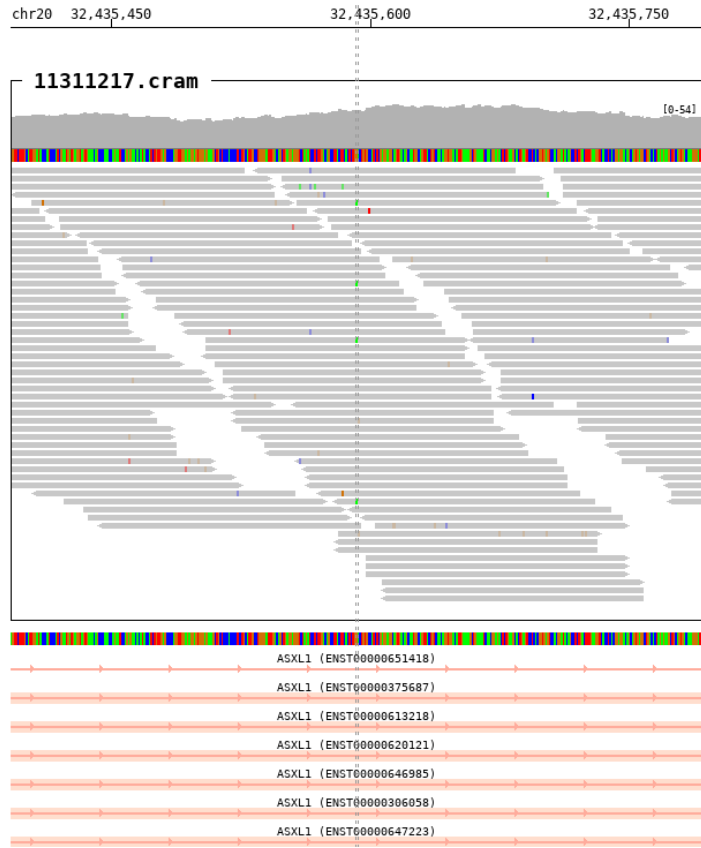

1.15. chr20\_32435665\_TCAACGGAGAC/-

| SampleID  | Variants (GRCh38)            | Ref_depth | Alt_depth | Gene  | Consequence        |
|-----------|------------------------------|-----------|-----------|-------|--------------------|
| 101106545 | chr20_32435665_TCAACGGAGAC/- | 45        | 4         | ASXL1 | frameshift_variant |

chr20 32,435,550 32,435,700 32,435,850

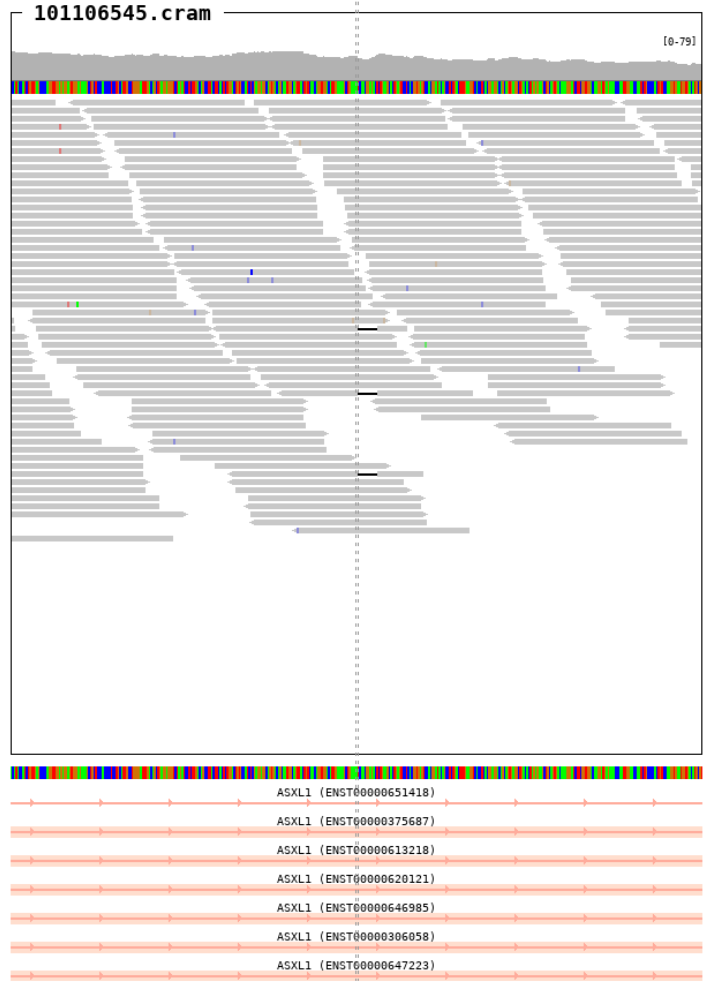

1.16. chr20\_32435696\_-/A

| SampleID | Variants (GRCh38)  | Ref_depth | Alt_depth | Gene  | Consequence        |
|----------|--------------------|-----------|-----------|-------|--------------------|
| 67380    | chr20_32435696_-/A | 30        | 4         | ASXL1 | frameshift_variant |

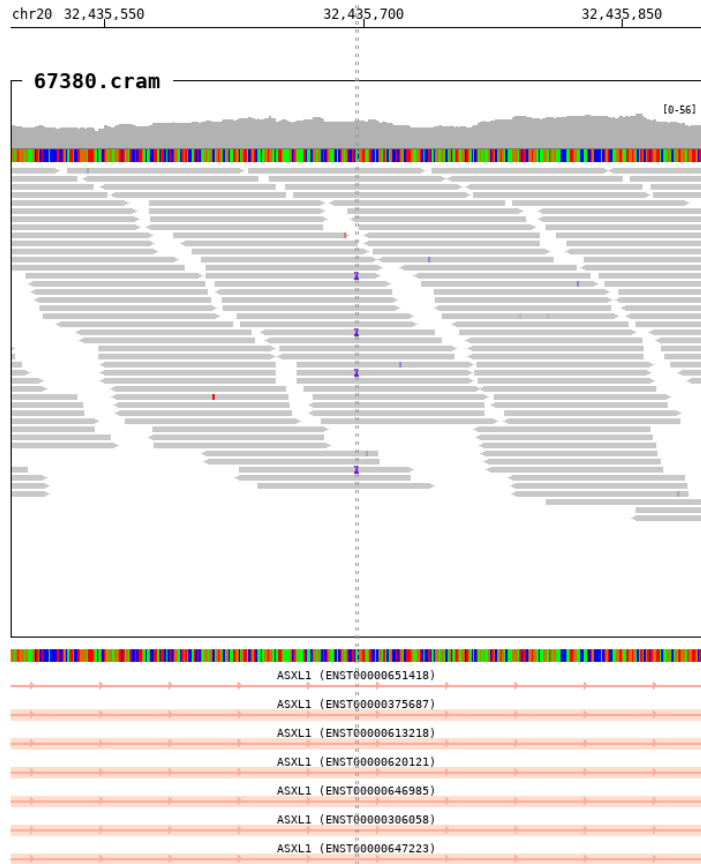

1.17. chr20\_32436442\_A/T

| SampleID  | Variants (GRCh38)  | Ref_depth | Alt_depth | Gene  | Consequence |
|-----------|--------------------|-----------|-----------|-------|-------------|
| 110106020 | chr20_32436442_A/T | 39        | 9         | ASXL1 | stop_gained |

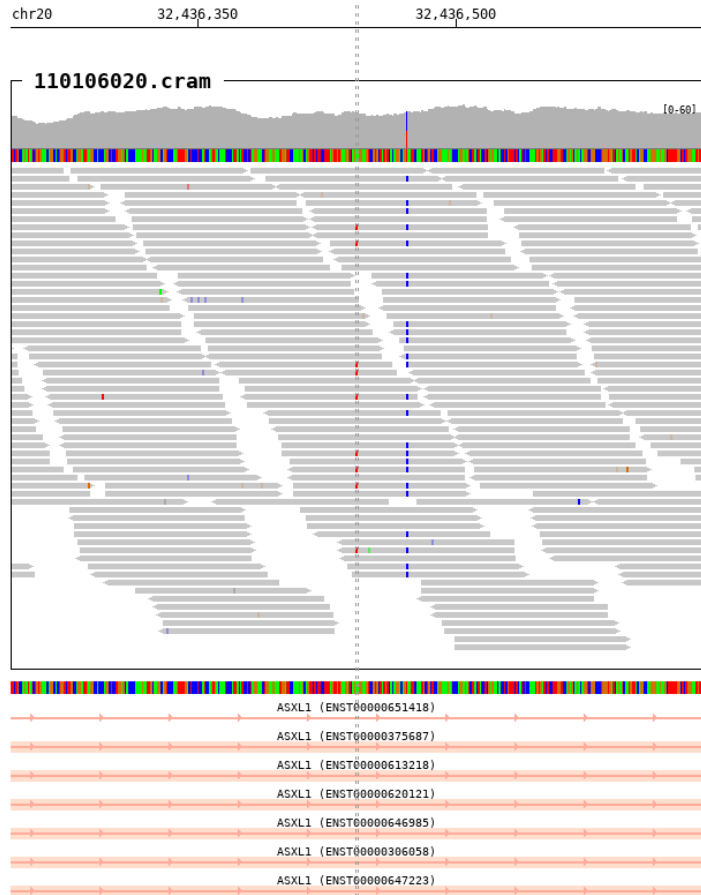

1.18. chr20\_32436449\_C/-

| SampleID | Variants (GRCh38)  | Ref_depth | Alt_depth | Gene  | Consequence        |
|----------|--------------------|-----------|-----------|-------|--------------------|
| 10012523 | chr20_32436449_C/- | 32        | 4         | ASXL1 | frameshift_variant |

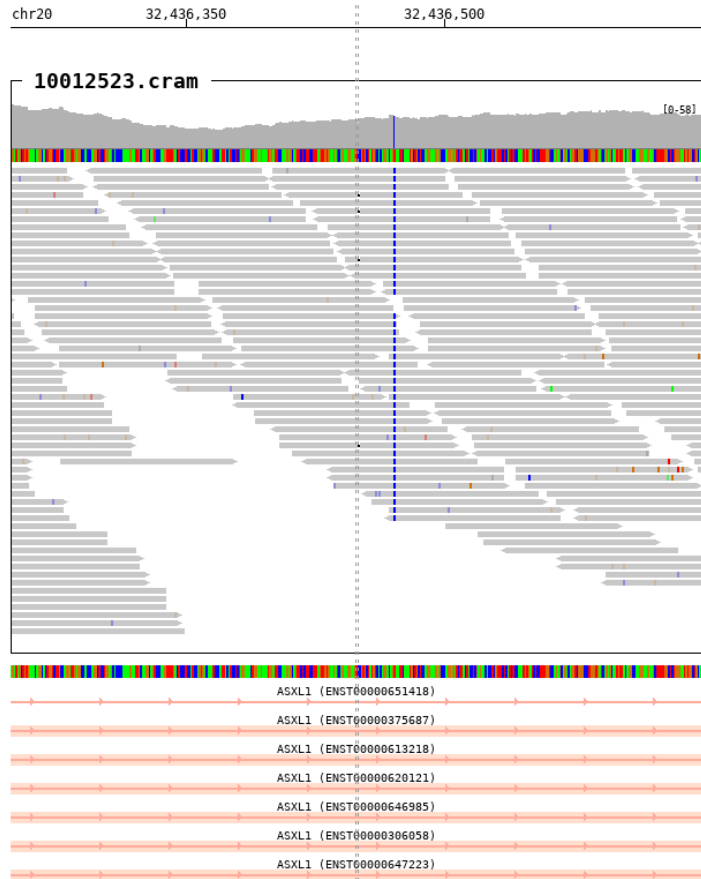

## 2. BCOR

### 2.1. chrX\_40064489\_GGGAGGCTCG/-

| SampleID  | Variants (GRCh38)          | Ref_depth | Alt_depth | Gene | Consequence        |
|-----------|----------------------------|-----------|-----------|------|--------------------|
| 112301174 | chrX_40064489_GGGAGGCTCG/- | 53        | 2         | BCOR | frameshift_variant |

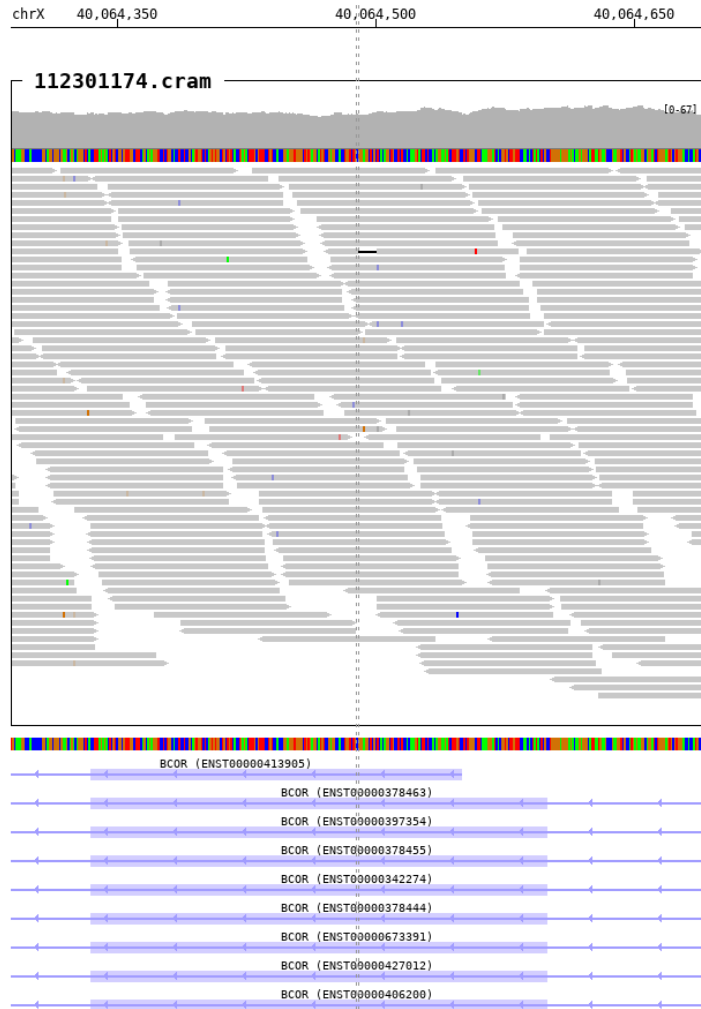

### 3. *BCORL1*

#### 3.1. chrX\_130028814\_C/T

| SampleID  | Variants (GRCh38)  | Ref_depth | Alt_depth | Gene          | Consequence |
|-----------|--------------------|-----------|-----------|---------------|-------------|
| 100605732 | chrX_130028814_C/T | 21        | 8         | <i>BCORL1</i> | stop_gained |

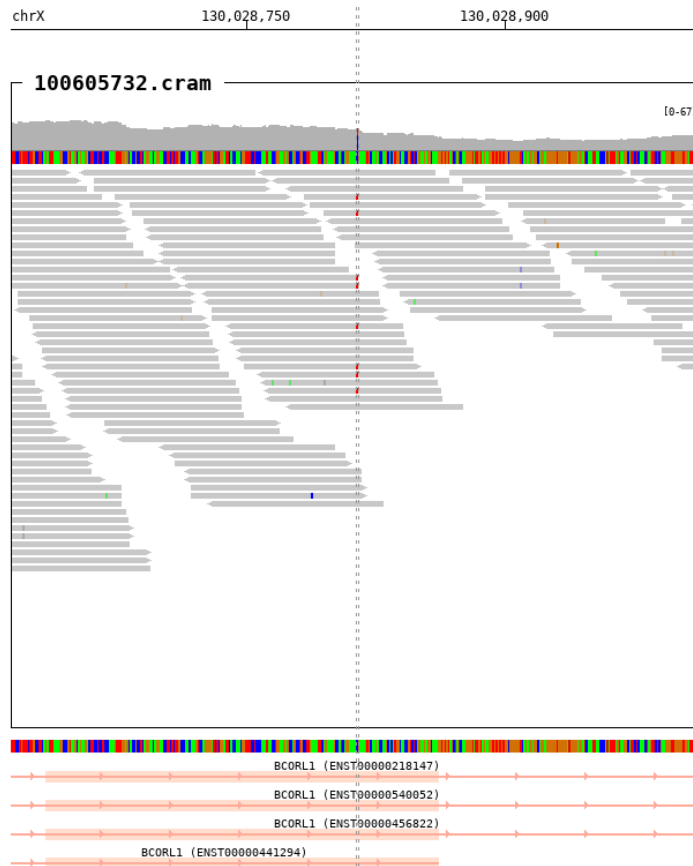

#### 4. BRCC3

##### 4.1. chrX\_155090840\_G/A

| SampleID  | Variants (GRCh38)  | Ref_depth | Alt_depth | Gene  | Consequence          |
|-----------|--------------------|-----------|-----------|-------|----------------------|
| 101102243 | chrX_155090840_G/A | 32        | 6         | BRCC3 | splice_donor_variant |

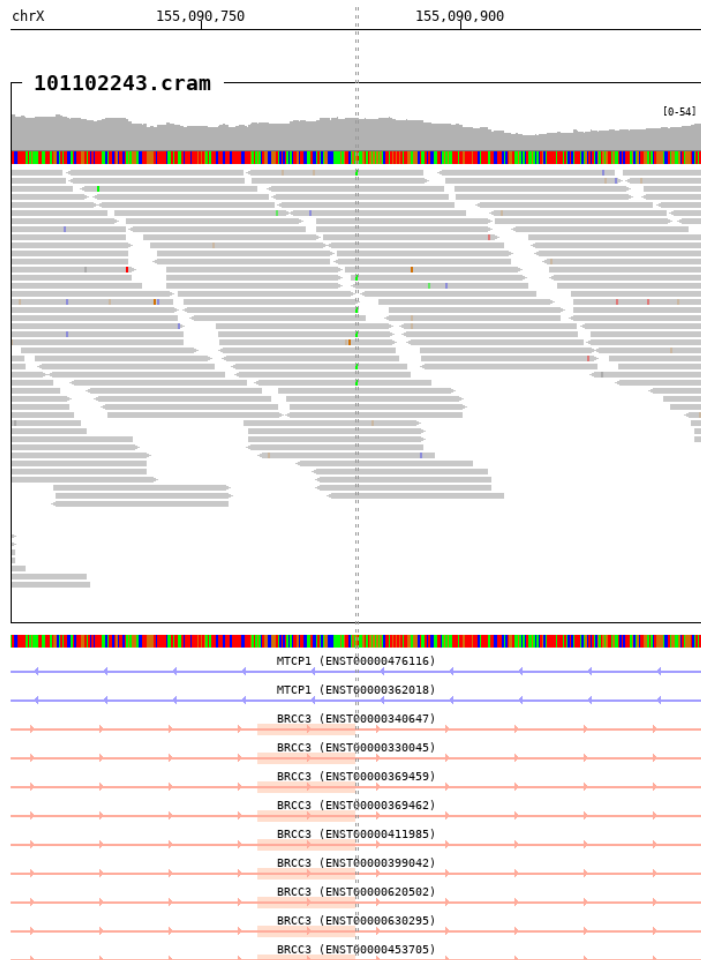

## 5. CBL

### 5.1. chr11\_119278618\_G/A

| SampleID   | Variants (GRCh38)   | Ref_depth | Alt_depth | Gene | Consequence      |
|------------|---------------------|-----------|-----------|------|------------------|
| 1302053309 | chr11_119278618_G/A | 30        | 9         | CBL  | missense_variant |

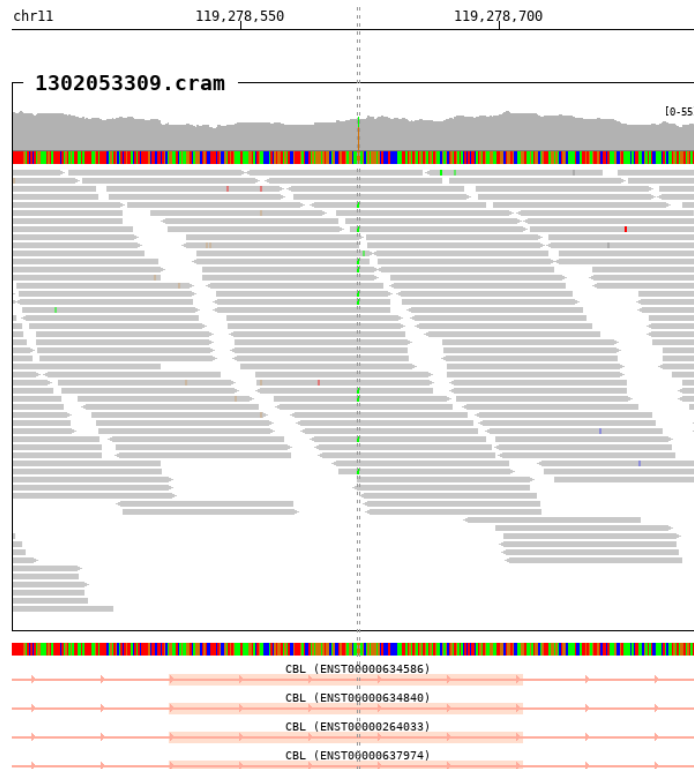

5.2. chr11\_119297001\_C/G

| SampleID | Variants (GRCh38)   | Ref_depth | Alt_depth | Gene | Consequence      |
|----------|---------------------|-----------|-----------|------|------------------|
| 65977    | chr11_119297001_C/G | 59        | 2         | CBL  | missense_variant |

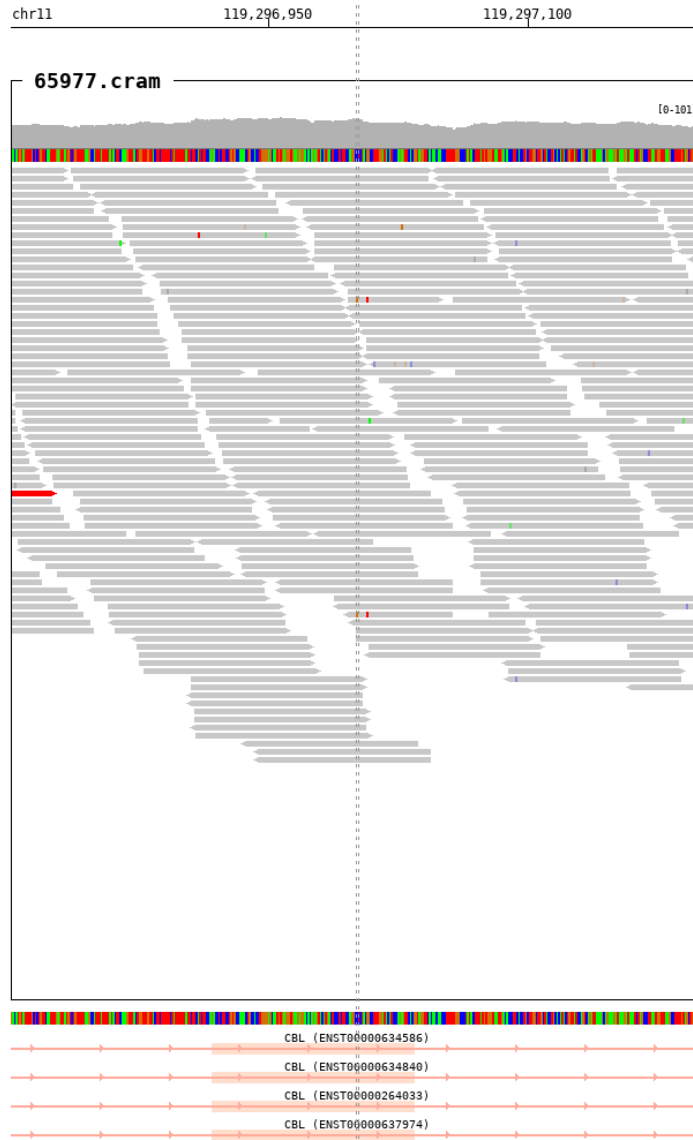

### 5.3. chr11\_119297007\_G/T

| SampleID | Variants (GRCh38)   | Ref_depth | Alt_depth | Gene       | Consequence      |
|----------|---------------------|-----------|-----------|------------|------------------|
| 65977    | chr11_119297007_G/T | 55        | 2         | <i>CBL</i> | missense_variant |

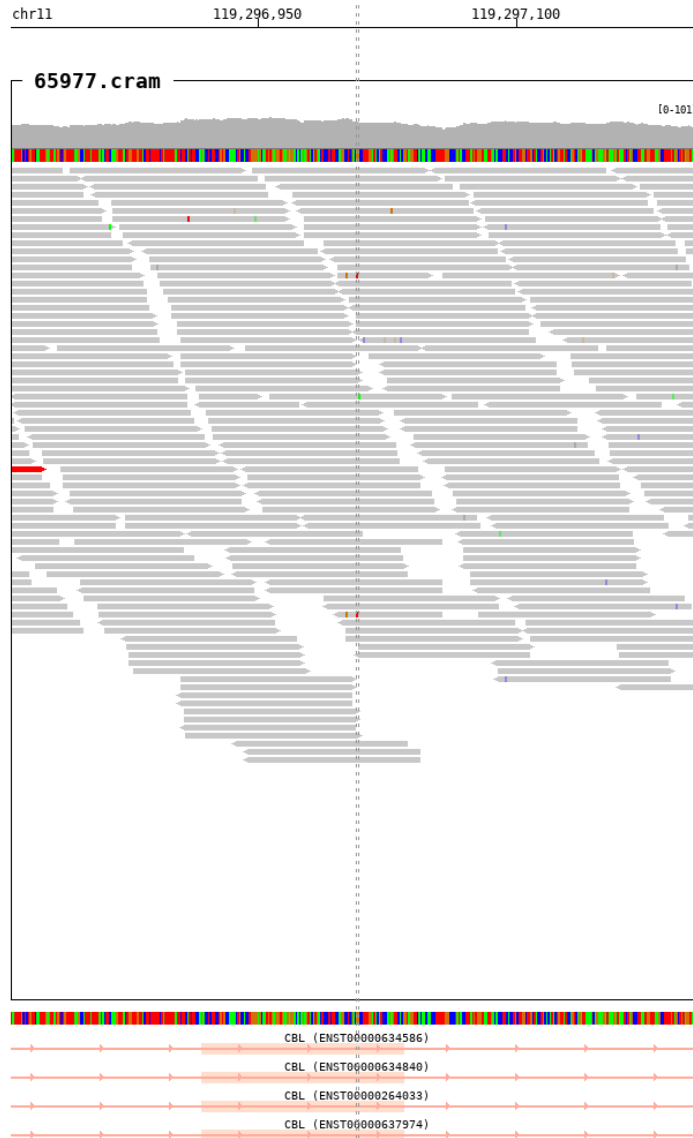

### 5.4. chr11\_119298457\_T/G

| SampleID | Variants (GRCh38)   | Ref_depth | Alt_depth | Gene       | Consequence      |
|----------|---------------------|-----------|-----------|------------|------------------|
| 67273    | chr11_119298457_T/G | 7         | 23        | <i>CBL</i> | missense_variant |

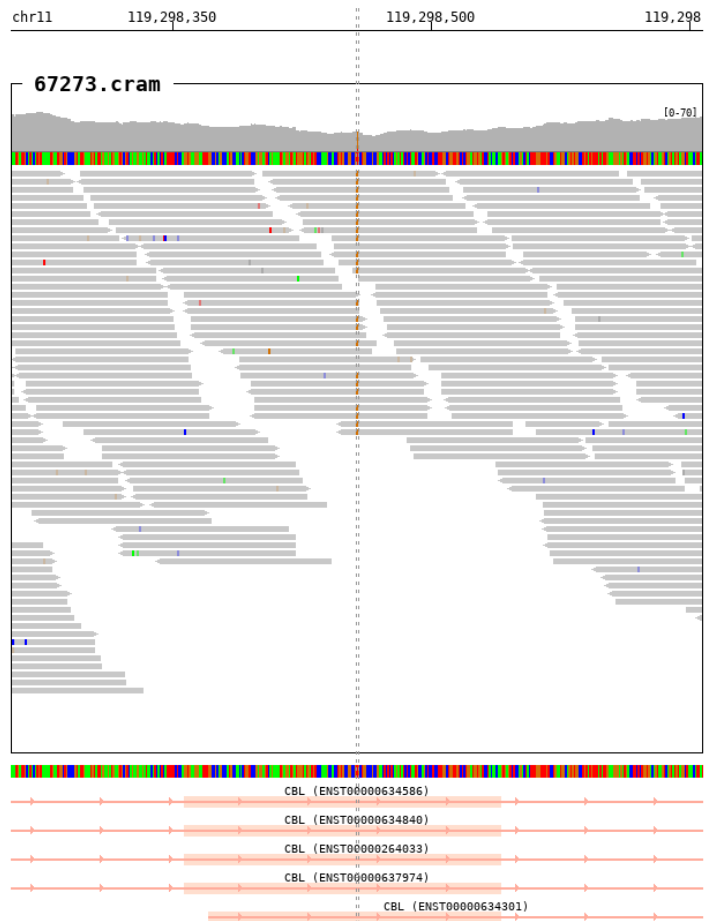

### 5.5. chr11\_119299593\_G/A

| SampleID  | Variants (GRCh38)   | Ref_depth | Alt_depth | Gene       | Consequence      |
|-----------|---------------------|-----------|-----------|------------|------------------|
| 112402889 | chr11_119299593_G/A | 25        | 8         | <i>CBL</i> | missense_variant |

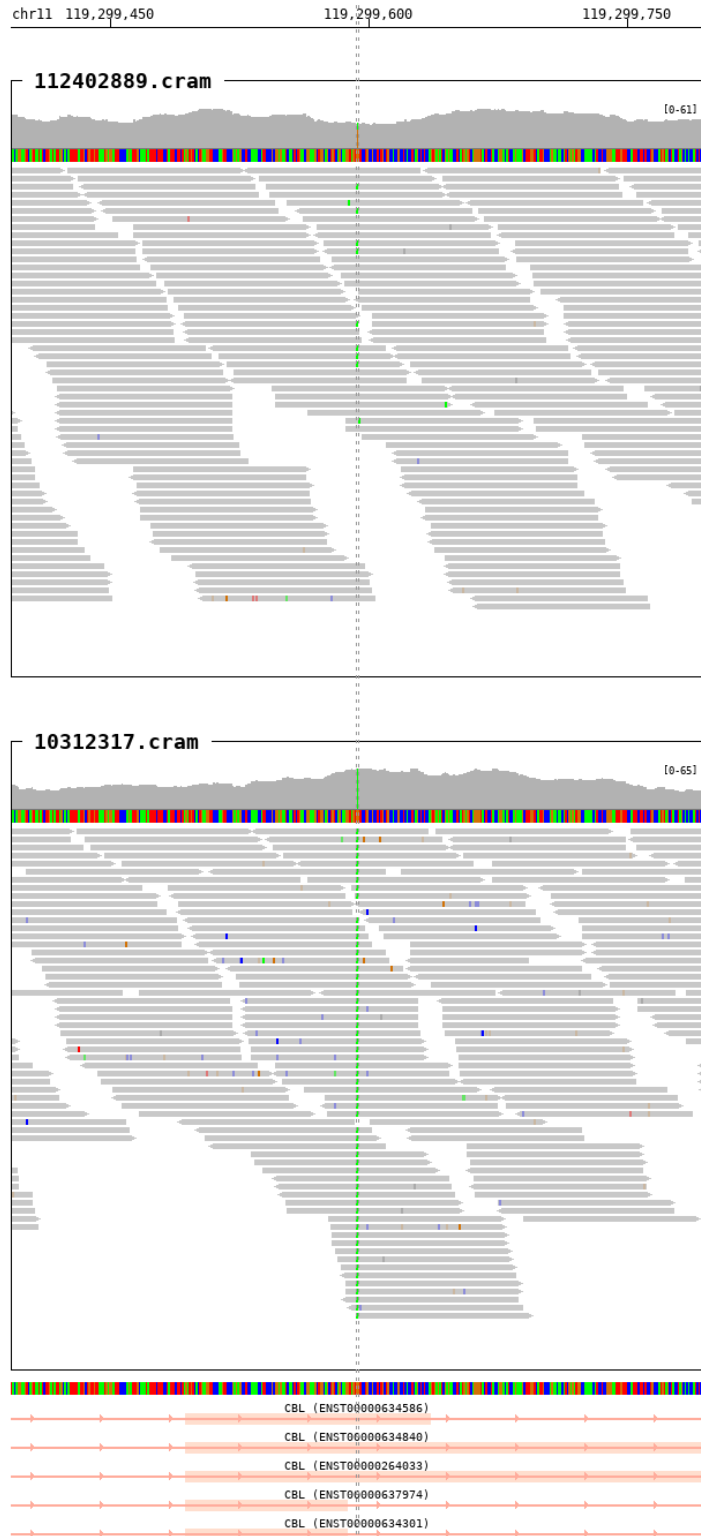

### 5.6. chr11\_119299599\_G/C

| SampleID | Variants (GRCh38)   | Ref_depth | Alt_depth | Gene       | Consequence      |
|----------|---------------------|-----------|-----------|------------|------------------|
| 10642353 | chr11_119299599_G/C | 33        | 5         | <i>CBL</i> | missense_variant |
| 11330807 | chr11_119299599_G/C | 38        | 4         | <i>CBL</i> | missense_variant |

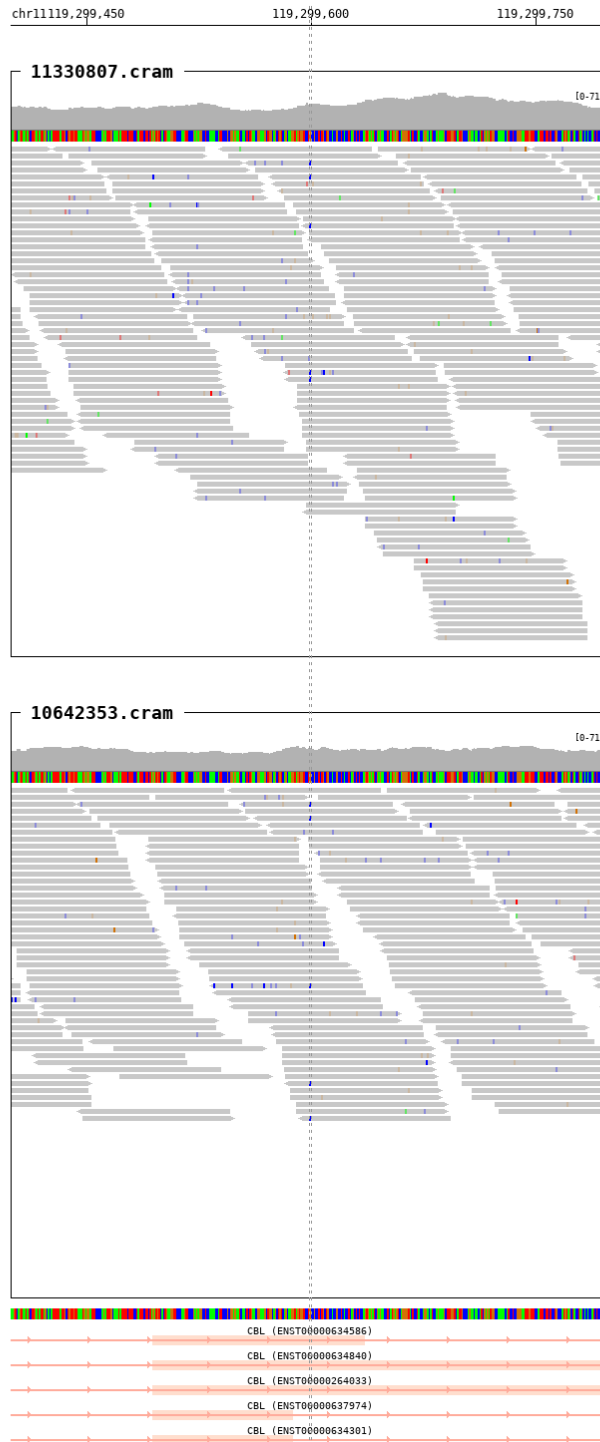

## 6. CBLB

### 6.1. chr3\_105659118\_G/A

| SampleID  | Variants (GRCh38)  | Ref_depth | Alt_depth | Gene | Consequence      |
|-----------|--------------------|-----------|-----------|------|------------------|
| 110102199 | chr3_105659118_G/A | 50        | 4         | CBLB | missense_variant |

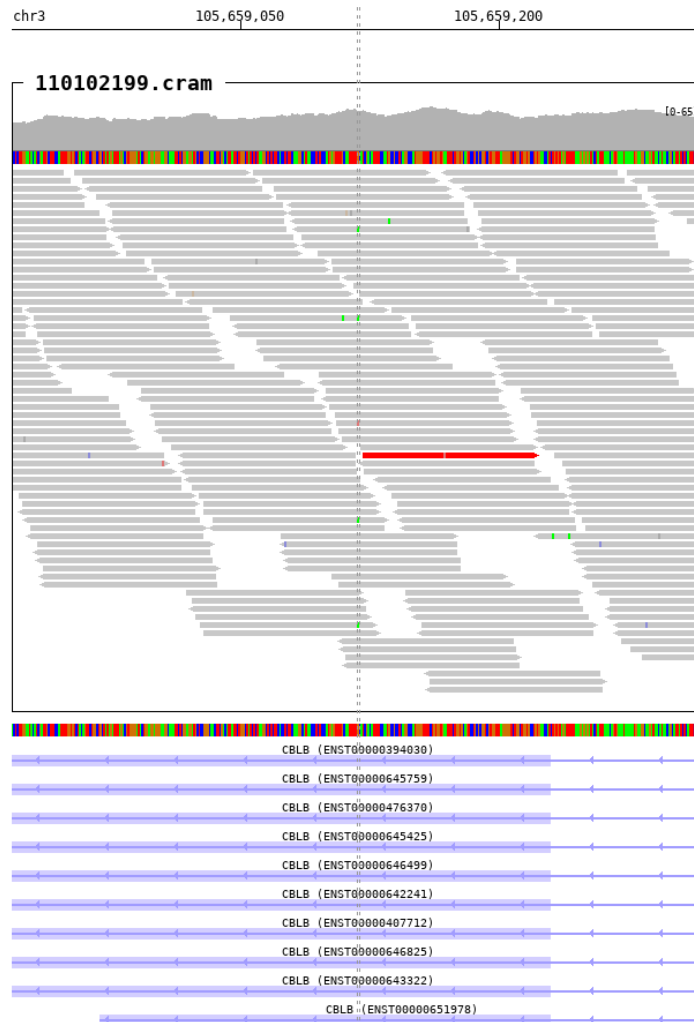

6.2. chr3\_105702125\_C/G

| SampleID | Variants (GRCh38)  | Ref_depth | Alt_depth | Gene | Consequence      |
|----------|--------------------|-----------|-----------|------|------------------|
| 10770688 | chr3_105702125_C/G | 36        | 5         | CBLB | missense_variant |

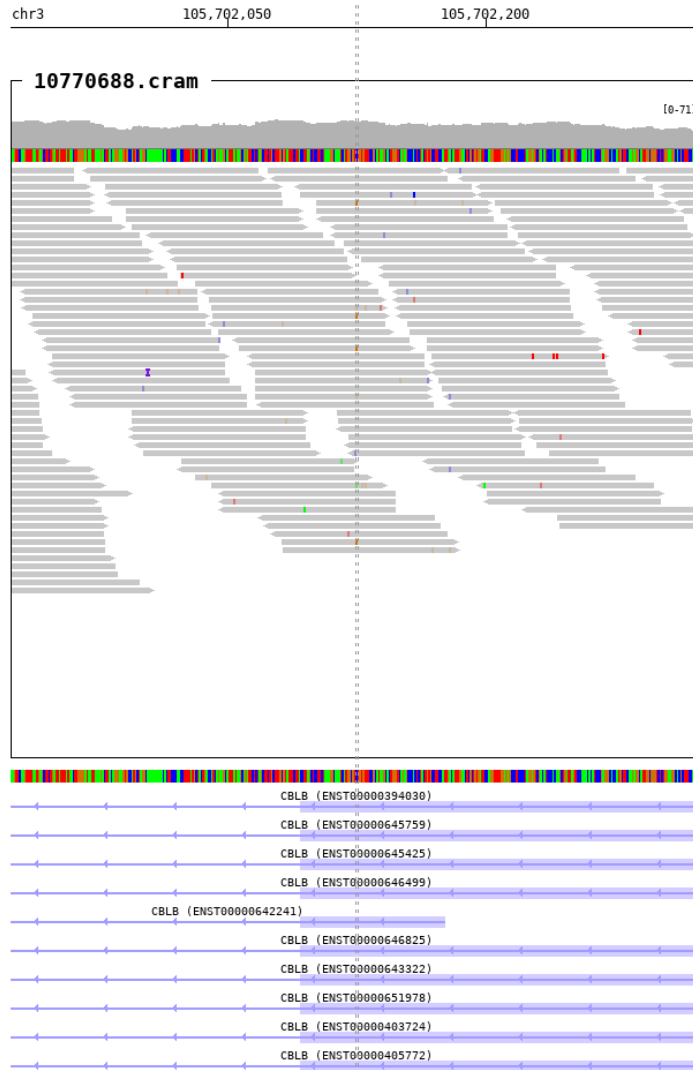

### 6.3. chr3\_105702297\_G/T

| SampleID | Variants (GRCh38)  | Ref_depth | Alt_depth | Gene | Consequence      |
|----------|--------------------|-----------|-----------|------|------------------|
| 10511959 | chr3_105702297_G/T | 28        | 10        | CBLB | missense_variant |

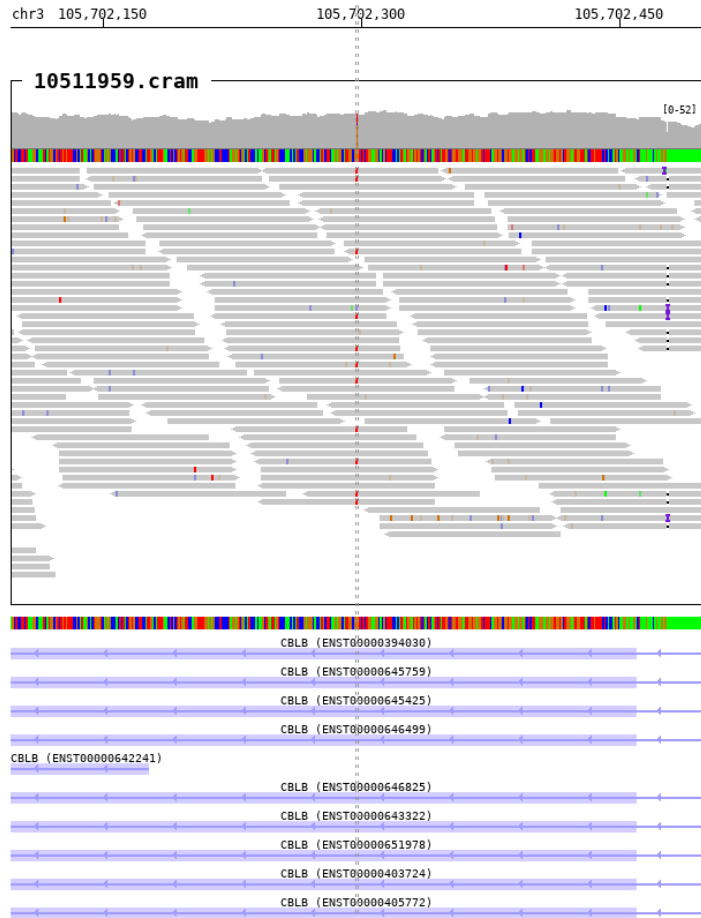

### 6.4. chr3\_105702441\_T/C

| SampleID | Variants (GRCh38)  | Ref_depth | Alt_depth | Gene        | Consequence      |
|----------|--------------------|-----------|-----------|-------------|------------------|
| 67086    | chr3_105702441_T/C | 31        | 6         | <i>CBLB</i> | missense_variant |

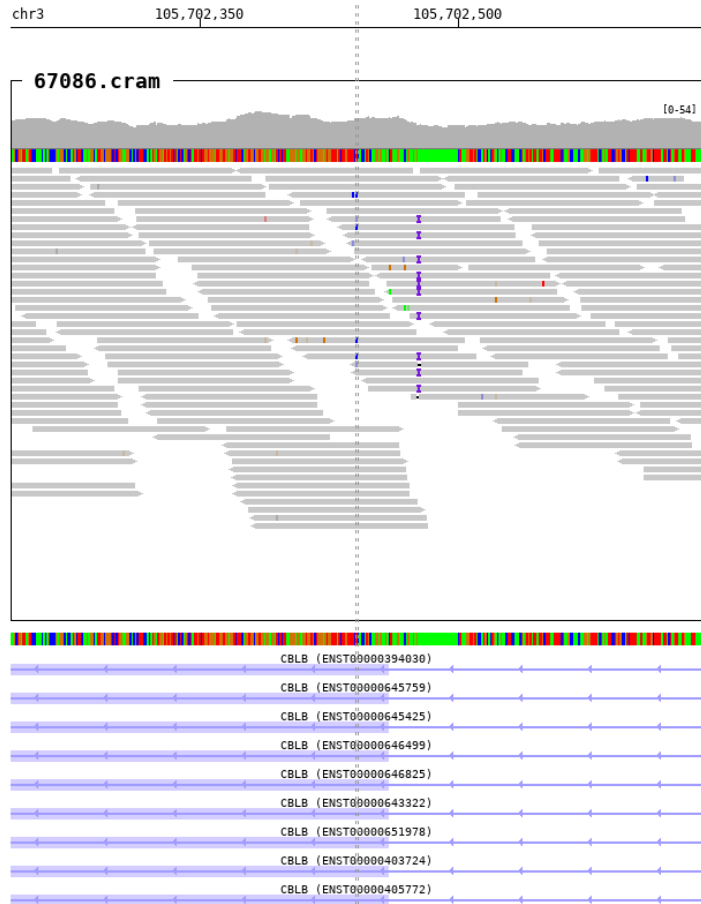

## 7. CREBBP

### 7.1. chr16\_3781258\_G/-

| SampleID  | Variants (GRCh38) | Ref_depth | Alt_depth | Gene   | Consequence        |
|-----------|-------------------|-----------|-----------|--------|--------------------|
| 111103886 | chr16_3781258_G/- | 54        | 6         | CREBBP | frameshift_variant |

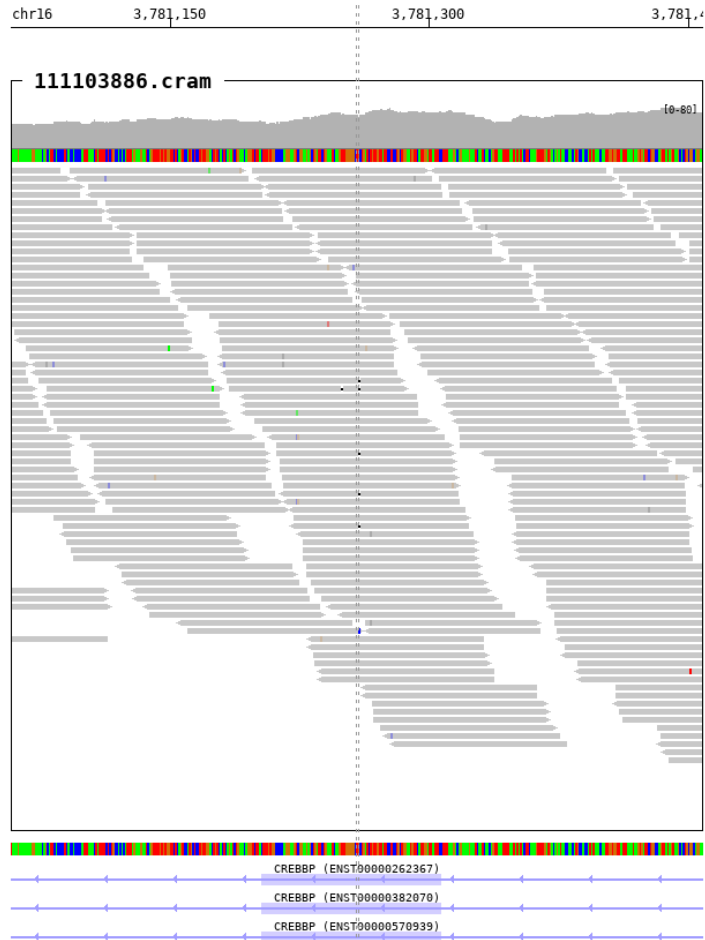

## 8. CTCF

### 8.1. chr16\_67636801\_GCGGAGAG/-

| SampleID  | Variants (GRCh38)         | Ref_depth | Alt_depth | Gene        | Consequence        |
|-----------|---------------------------|-----------|-----------|-------------|--------------------|
| 110106397 | chr16_67636801_GCGGAGAG/- | 35        | 3         | <i>CTCF</i> | frameshift_variant |
| 112302197 | chr16_67636801_GCGGAGAG/- | 47        | 4         | <i>CTCF</i> | frameshift_variant |

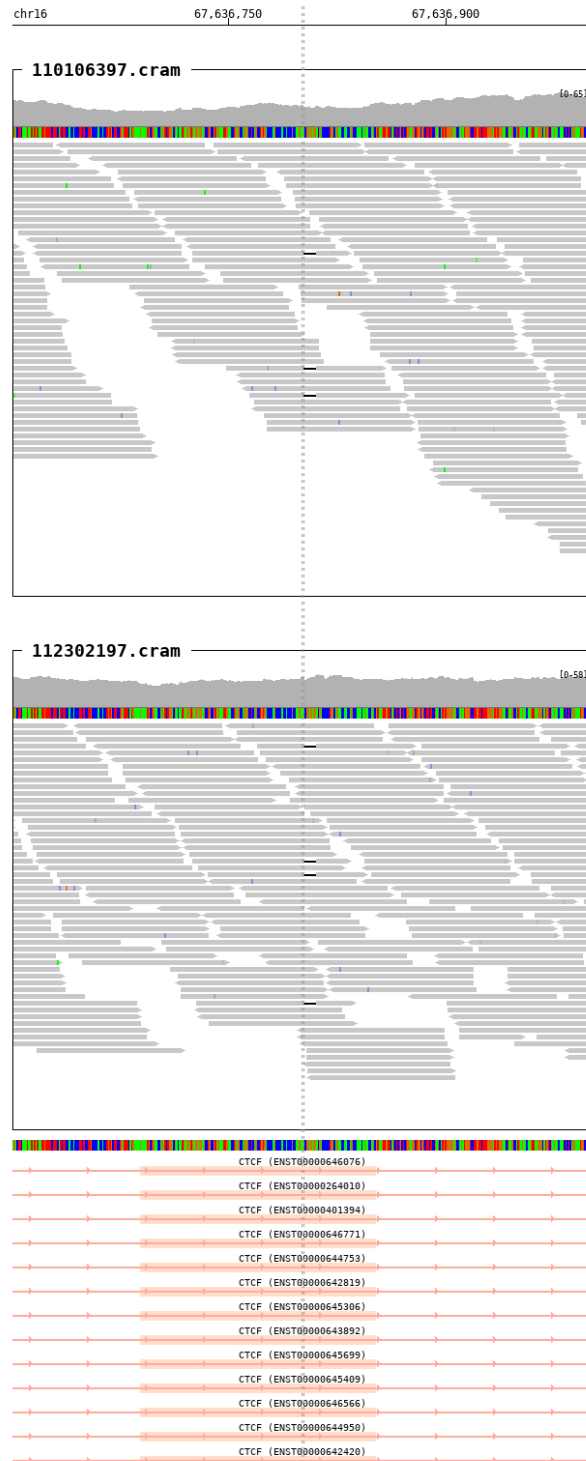

## 9. CUX1

### 9.1. chr7\_102111753\_AGGTTCAGAGCCTACAAAC/-

| SampleID | Variants (GRCh38)                        | Ref_depth | Alt_depth | Gene | Consequence        |
|----------|------------------------------------------|-----------|-----------|------|--------------------|
| 10642308 | chr7_102111753_AGGTTCAGAGCCTACA<br>AAC/- | 37        | 3         | CUX1 | frameshift_variant |

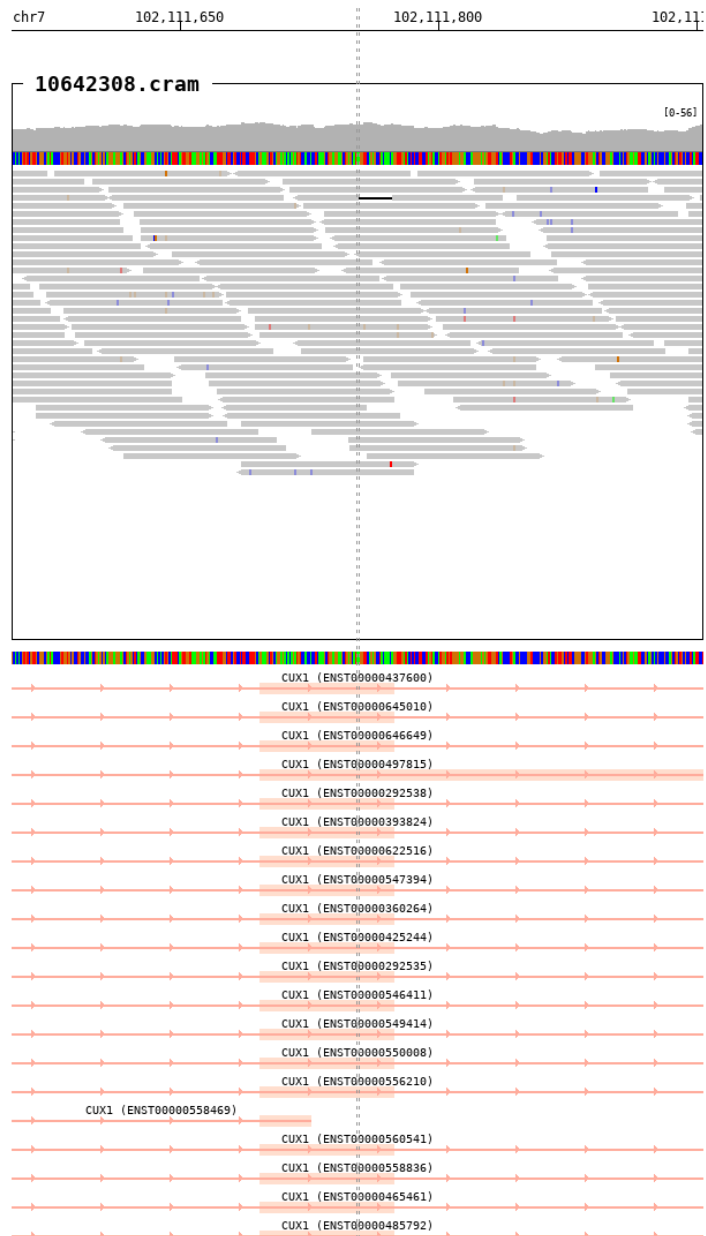

9.2. chr7\_102196778\_AAGTC/-

| SampleID  | Variants (GRCh38)      | Ref_depth | Alt_depth | Gene | Consequence        |
|-----------|------------------------|-----------|-----------|------|--------------------|
| 112401463 | chr7_102196778_AAGTC/- | 48        | 3         | CUX1 | frameshift_variant |

chr7 102,196,650 102,196,800 102,196,950

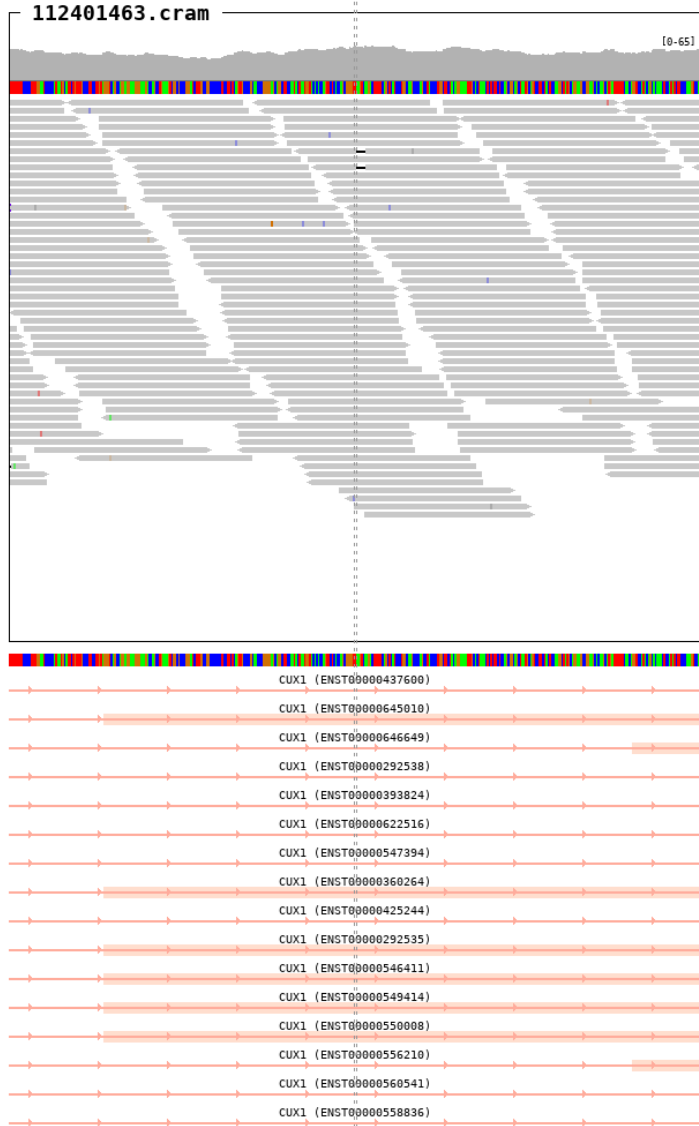

9.3. chr7\_102248646\_CCGCCGCCCTCGGGGA/-

| SampleID  | Variants (GRCh38)                     | Ref_depth | Alt_depth | Gene | Consequence        |
|-----------|---------------------------------------|-----------|-----------|------|--------------------|
| 110105848 | chr7_102248646_CCGCCGCCCTCGGGG<br>A/- | 22        | 2         | CUX1 | frameshift_variant |

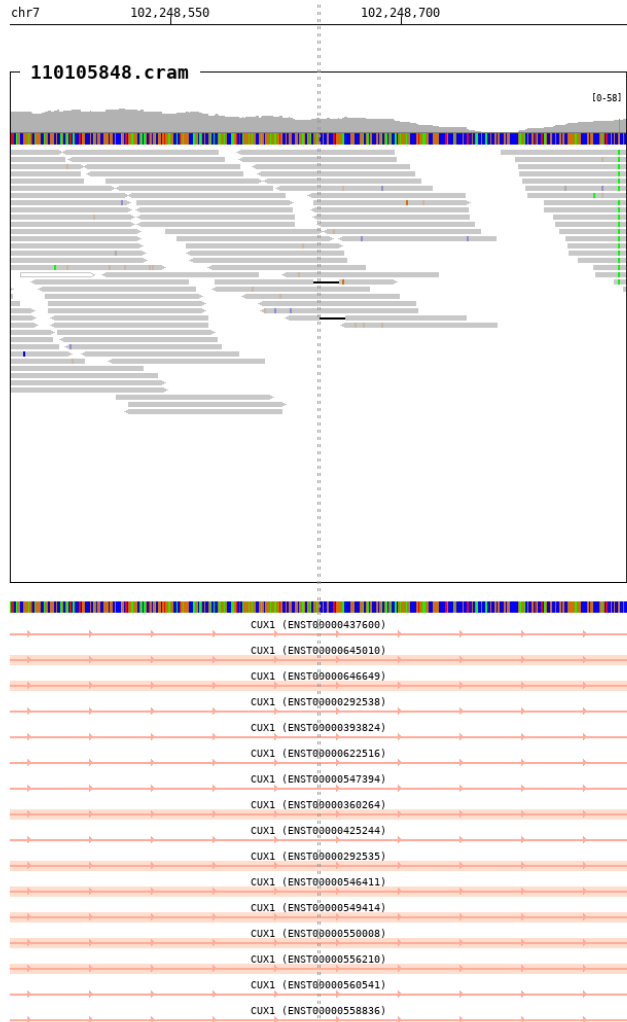

## 10. DNMT3A

### 10.1. chr2\_25234299\_-/C

| SampleID | Variants (GRCh38) | Ref_depth | Alt_depth | Gene   | Consequence        |
|----------|-------------------|-----------|-----------|--------|--------------------|
| 11310643 | chr2_25234299_-/C | 37        | 11        | DNMT3A | frameshift_variant |

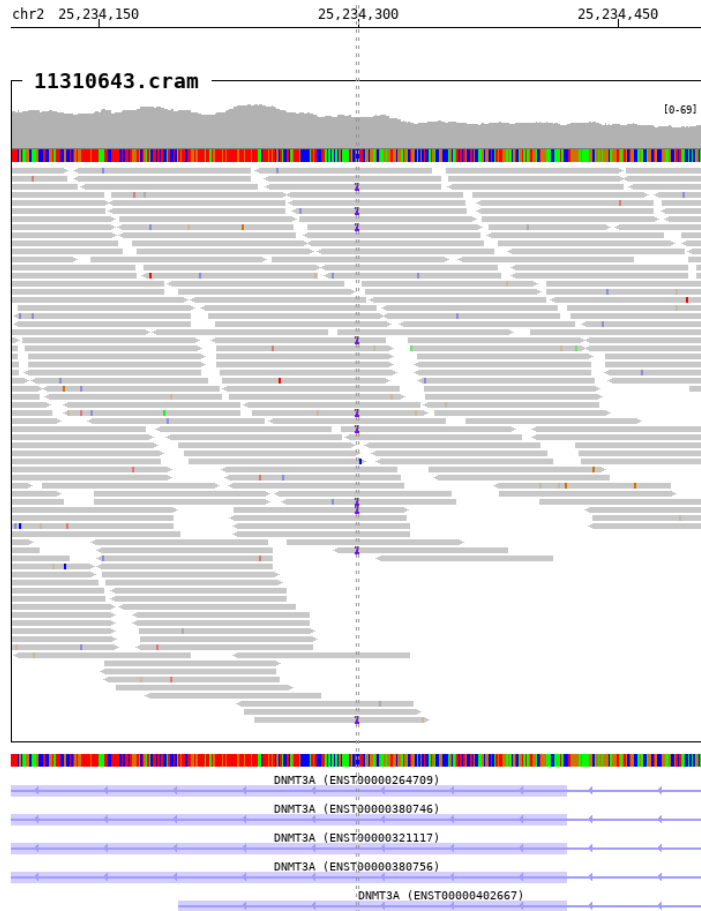

10.2. chr2\_25234307\_G/A

| SampleID  | Variants (GRCh38) | Ref_depth | Alt_depth | Gene          | Consequence      |
|-----------|-------------------|-----------|-----------|---------------|------------------|
| 100604022 | chr2_25234307_G/A | 29        | 3         | <i>DNMT3A</i> | missense_variant |
| 10302404  | chr2_25234307_G/A | 47        | 4         | <i>DNMT3A</i> | missense_variant |
| 11050737  | chr2_25234307_G/A | 35        | 7         | <i>DNMT3A</i> | missense_variant |
| 12390138  | chr2_25234307_G/A | 36        | 3         | <i>DNMT3A</i> | missense_variant |
| 62765     | chr2_25234307_G/A | 46        | 12        | <i>DNMT3A</i> | missense_variant |

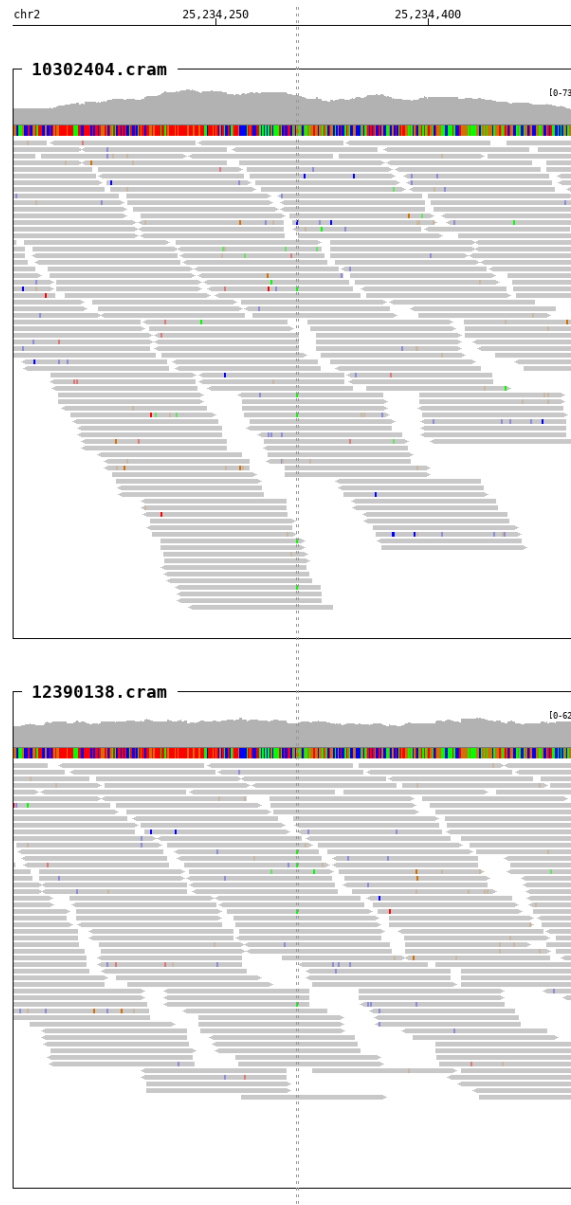

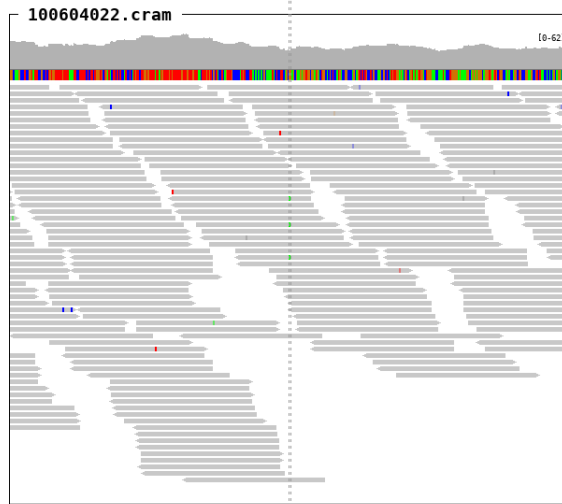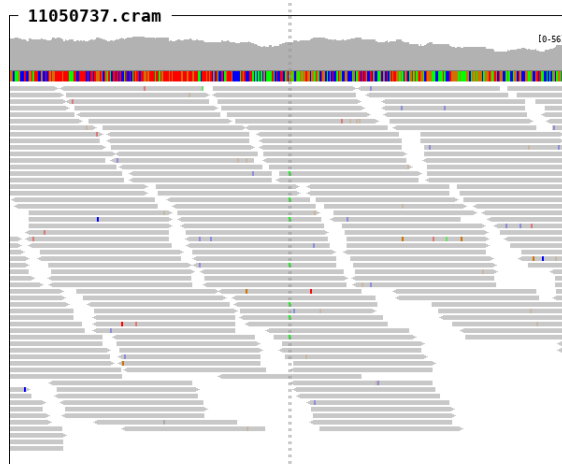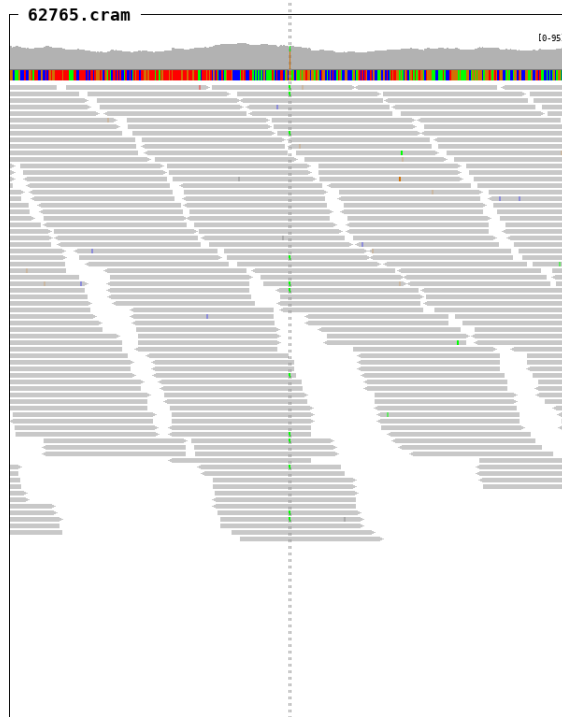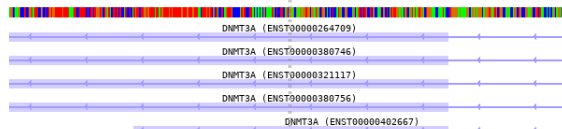

10.3. chr2\_25234367\_G/A

| SampleID  | Variants (GRCh38) | Ref_depth | Alt_depth | Gene   | Consequence      |
|-----------|-------------------|-----------|-----------|--------|------------------|
| 102106523 | chr2_25234367_G/A | 42        | 8         | DNMT3A | missense_variant |

chr2 25,234,250 25,234,400 25,234,55

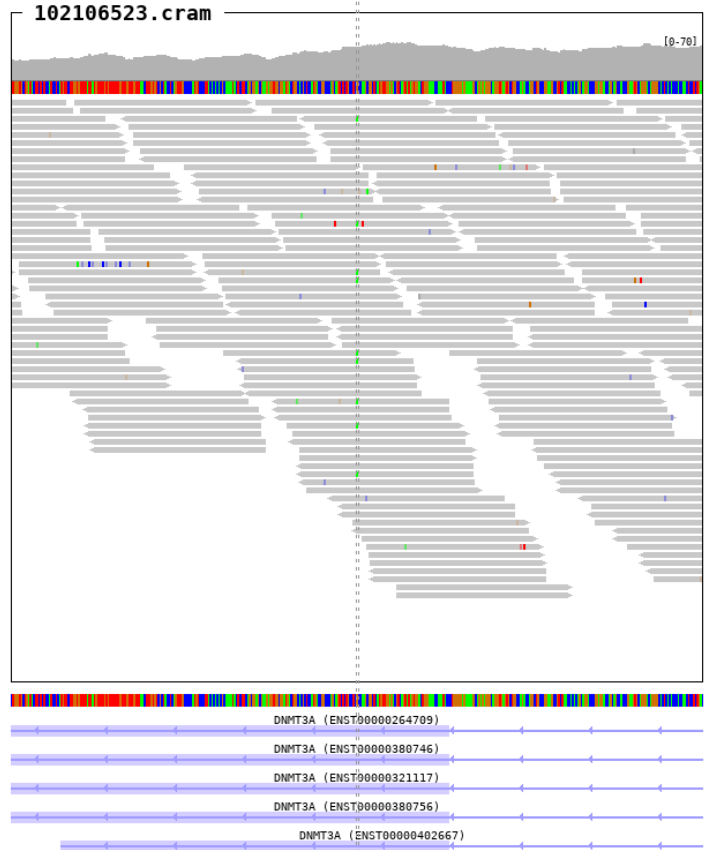

10.4. chr2\_25234373\_C/T

| SampleID   | Variants (GRCh38) | Ref_depth | Alt_depth | Gene          | Consequence      |
|------------|-------------------|-----------|-----------|---------------|------------------|
| 10012318   | chr2_25234373_C/T | 53        | 6         | <i>DNMT3A</i> | missense_variant |
| 10012653   | chr2_25234373_C/T | 36        | 6         | <i>DNMT3A</i> | missense_variant |
| 100605023  | chr2_25234373_C/T | 33        | 7         | <i>DNMT3A</i> | missense_variant |
| 100606074  | chr2_25234373_C/T | 30        | 4         | <i>DNMT3A</i> | missense_variant |
| 100609051  | chr2_25234373_C/T | 43        | 3         | <i>DNMT3A</i> | missense_variant |
| 100609394  | chr2_25234373_C/T | 43        | 4         | <i>DNMT3A</i> | missense_variant |
| 101606945  | chr2_25234373_C/T | 28        | 5         | <i>DNMT3A</i> | missense_variant |
| 10340657   | chr2_25234373_C/T | 47        | 4         | <i>DNMT3A</i> | missense_variant |
| 10511907   | chr2_25234373_C/T | 35        | 5         | <i>DNMT3A</i> | missense_variant |
| 10642231   | chr2_25234373_C/T | 55        | 9         | <i>DNMT3A</i> | missense_variant |
| 10672157   | chr2_25234373_C/T | 39        | 5         | <i>DNMT3A</i> | missense_variant |
| 110100971  | chr2_25234373_C/T | 45        | 4         | <i>DNMT3A</i> | missense_variant |
| 110108852  | chr2_25234373_C/T | 59        | 11        | <i>DNMT3A</i> | missense_variant |
| 111102643  | chr2_25234373_C/T | 37        | 3         | <i>DNMT3A</i> | missense_variant |
| 112302462  | chr2_25234373_C/T | 35        | 4         | <i>DNMT3A</i> | missense_variant |
| 11330885   | chr2_25234373_C/T | 36        | 4         | <i>DNMT3A</i> | missense_variant |
| 11560385   | chr2_25234373_C/T | 34        | 4         | <i>DNMT3A</i> | missense_variant |
| 1501033231 | chr2_25234373_C/T | 36        | 3         | <i>DNMT3A</i> | missense_variant |
| 61583      | chr2_25234373_C/T | 54        | 11        | <i>DNMT3A</i> | missense_variant |
| 63733      | chr2_25234373_C/T | 38        | 4         | <i>DNMT3A</i> | missense_variant |
| 66028      | chr2_25234373_C/T | 42        | 9         | <i>DNMT3A</i> | missense_variant |
| 66742      | chr2_25234373_C/T | 58        | 7         | <i>DNMT3A</i> | missense_variant |
| 67660      | chr2_25234373_C/T | 36        | 7         | <i>DNMT3A</i> | missense_variant |
| 68119      | chr2_25234373_C/T | 34        | 4         | <i>DNMT3A</i> | missense_variant |

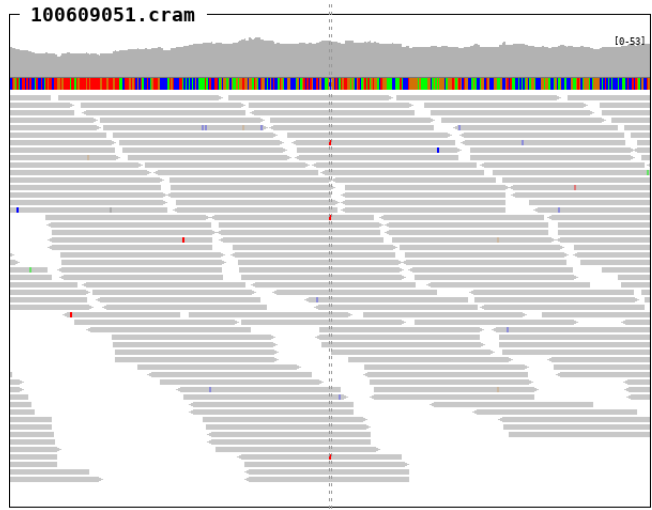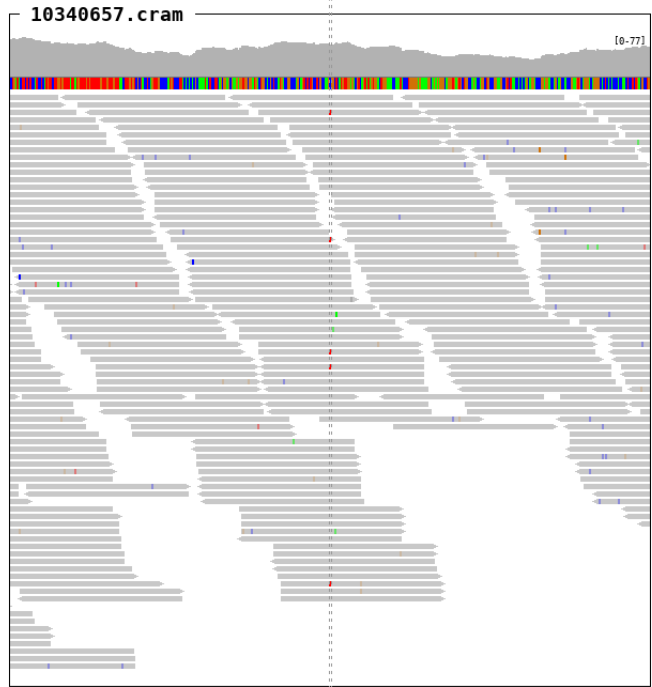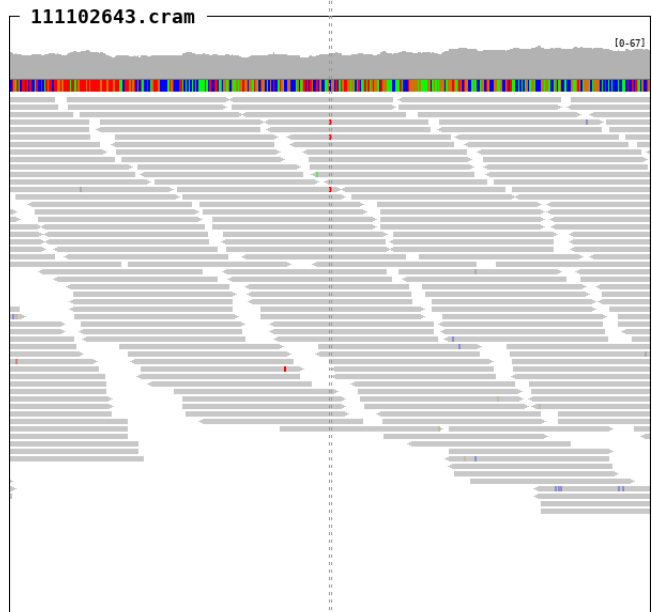

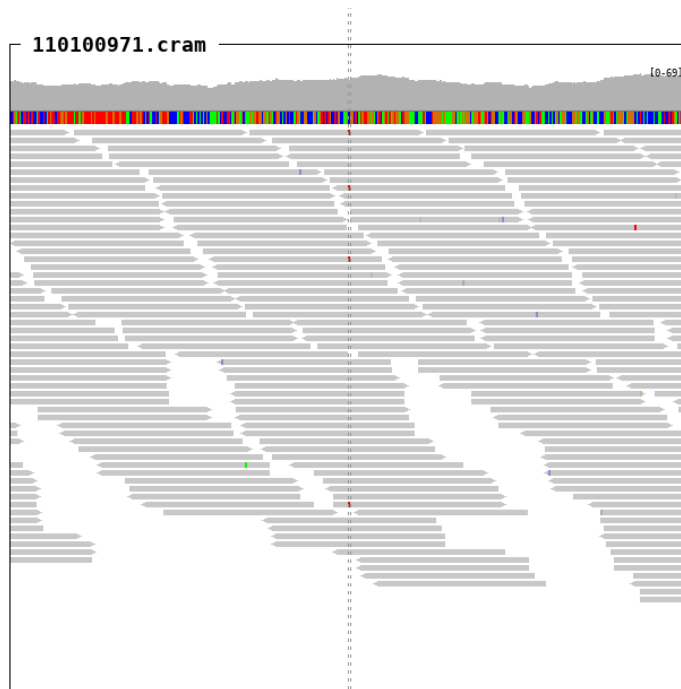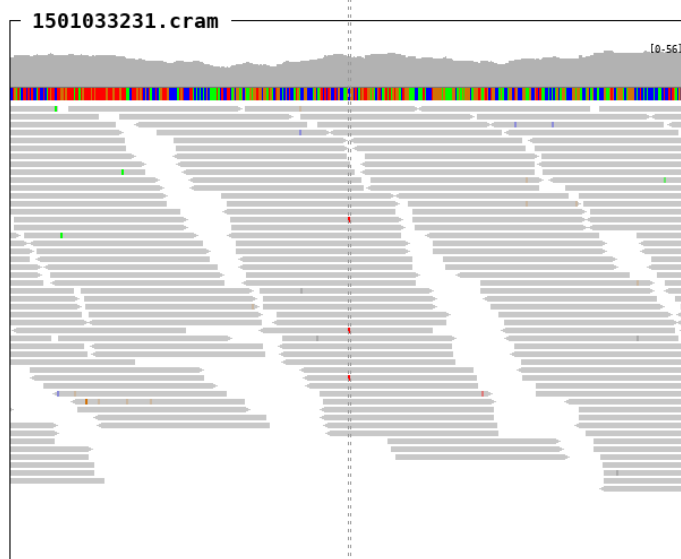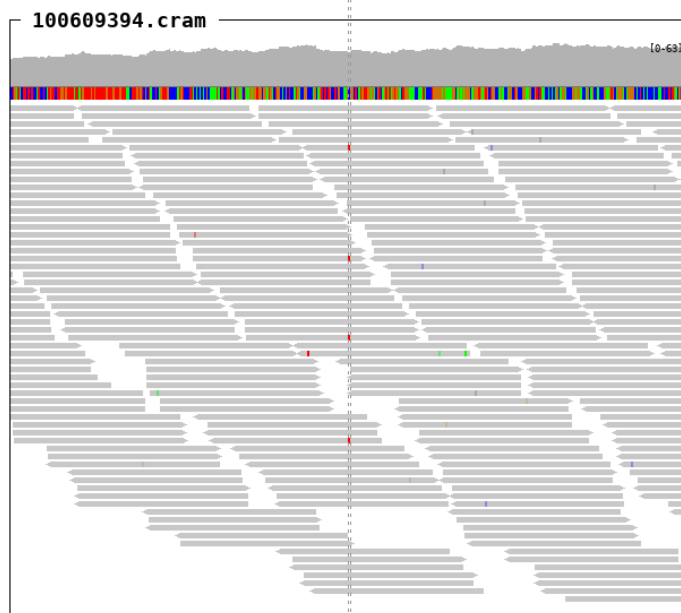

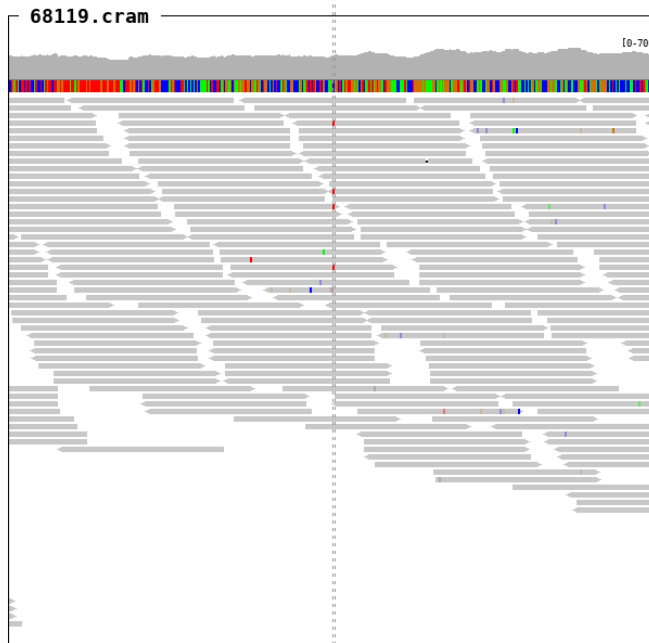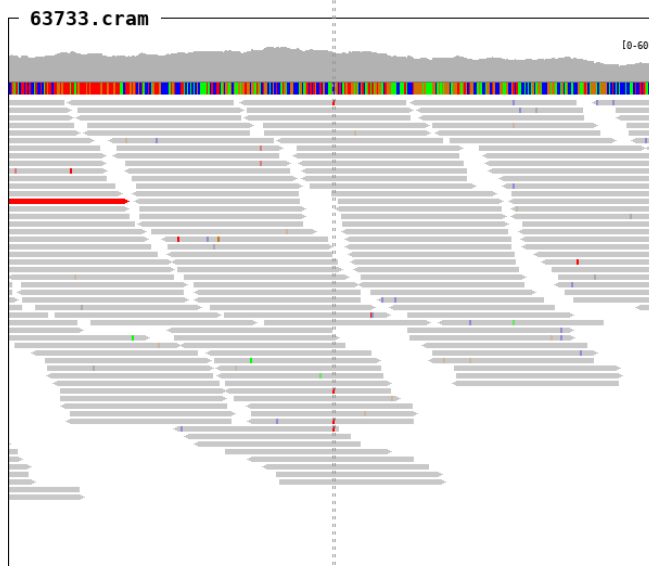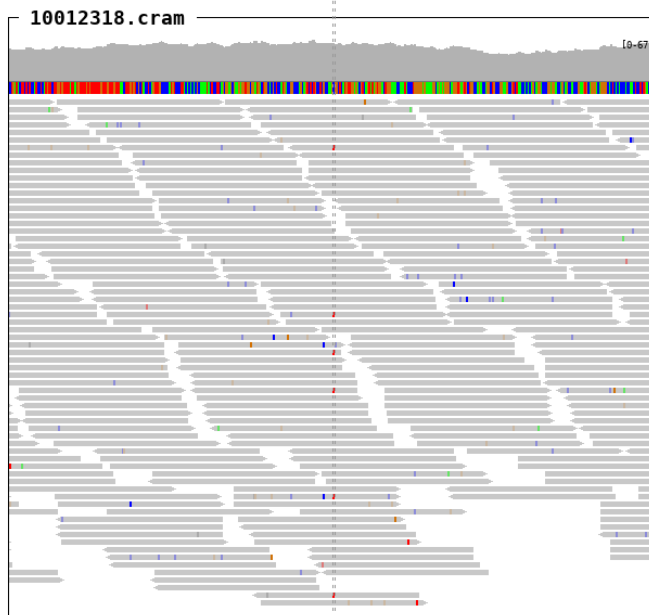

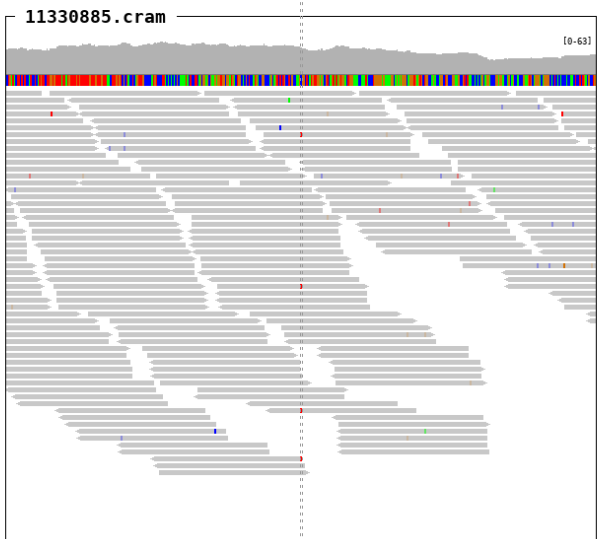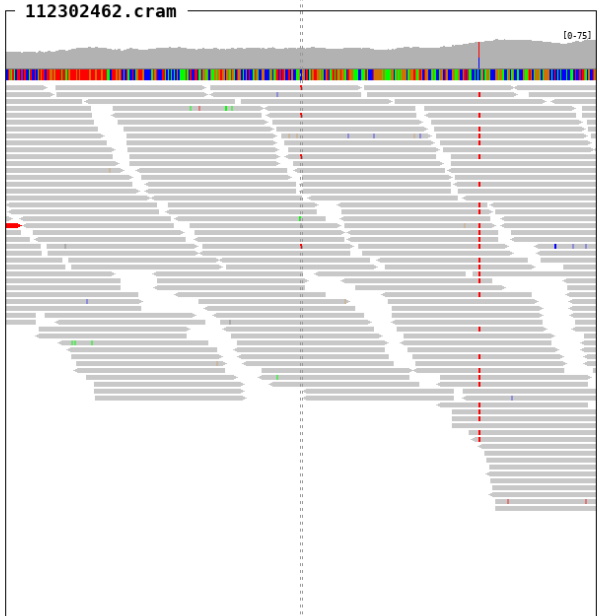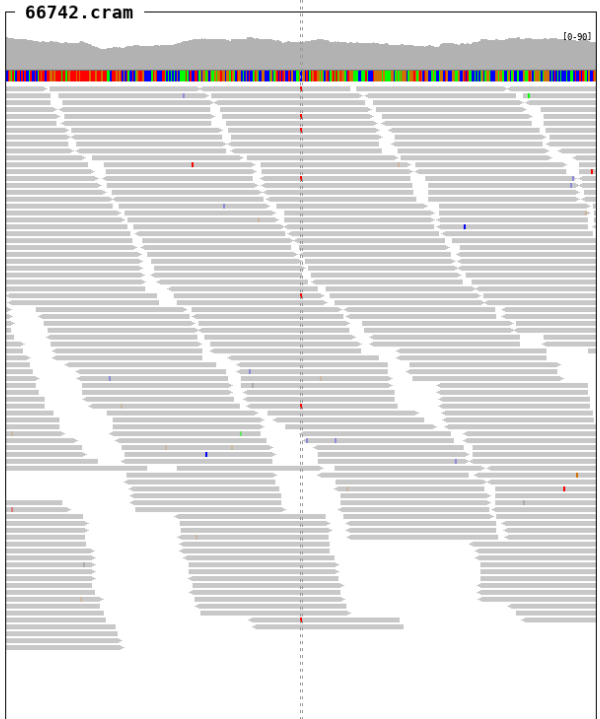

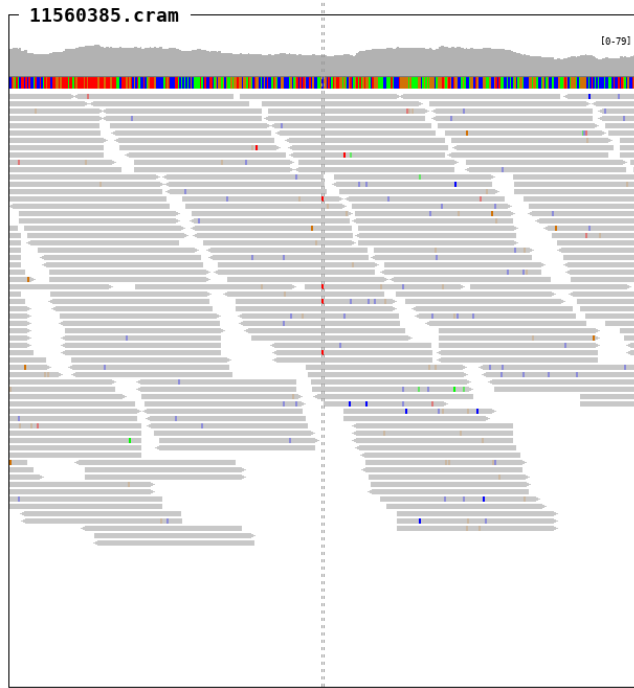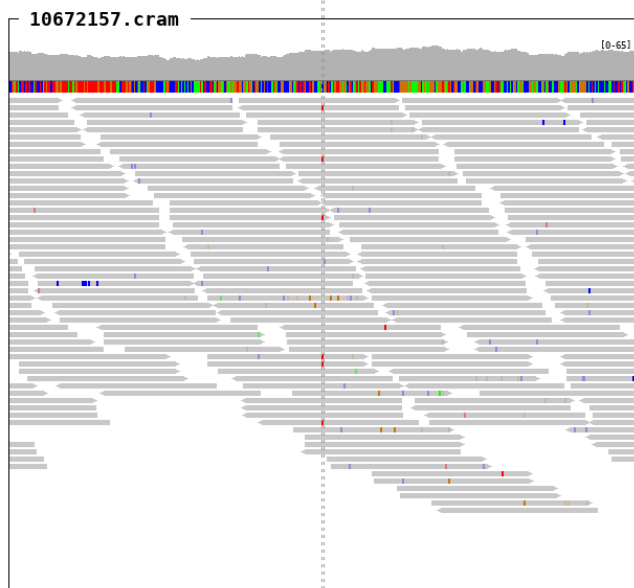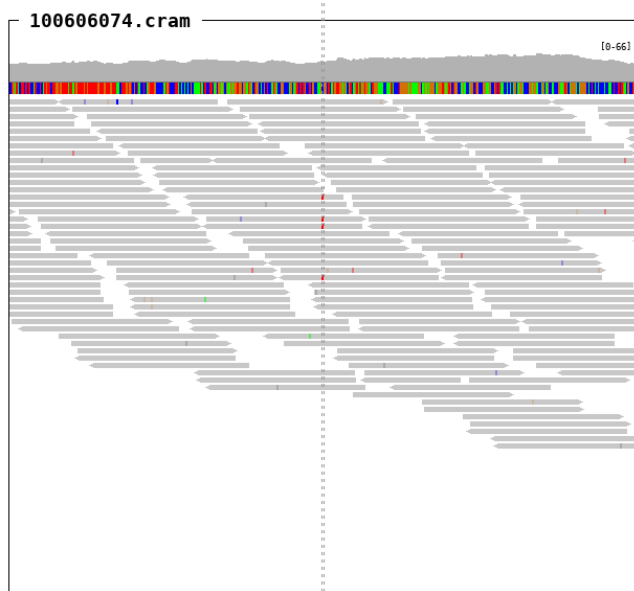

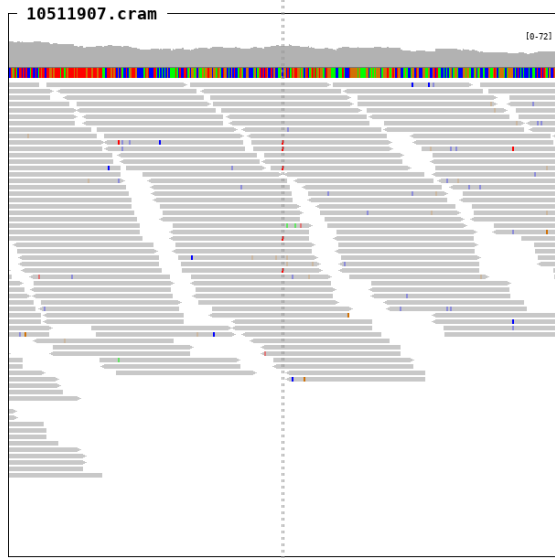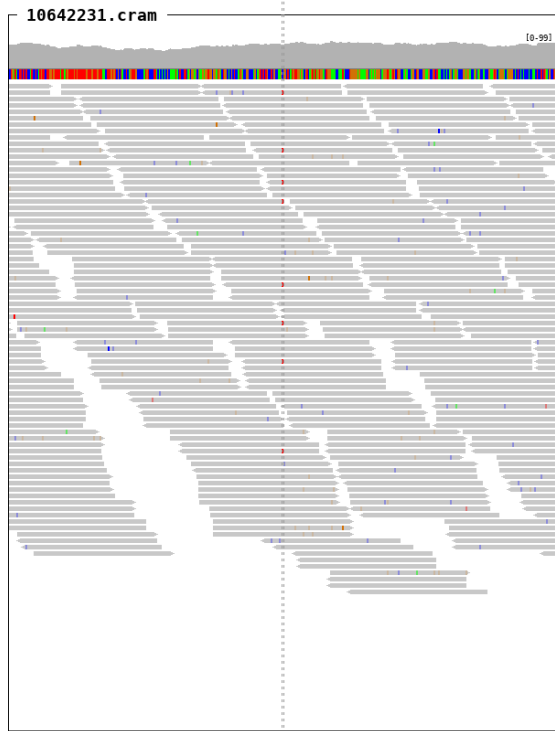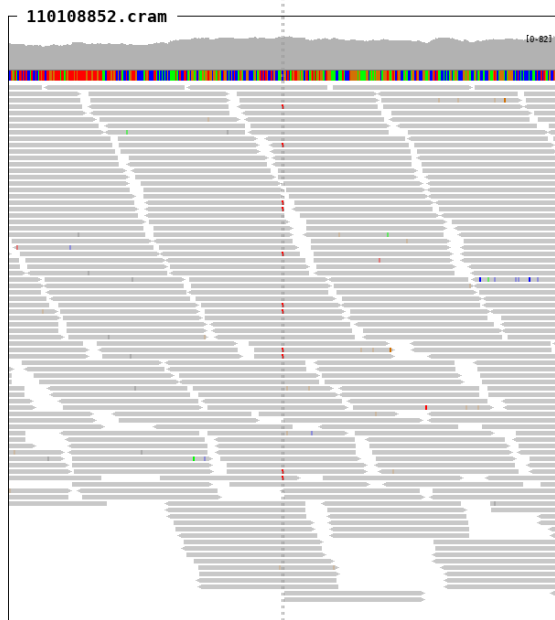

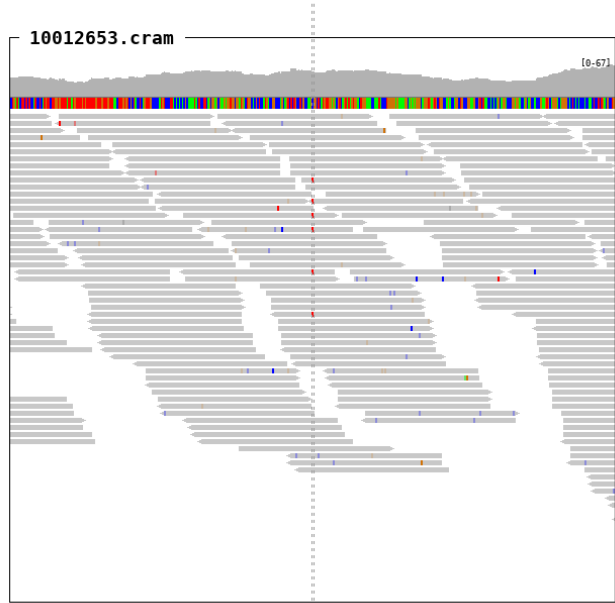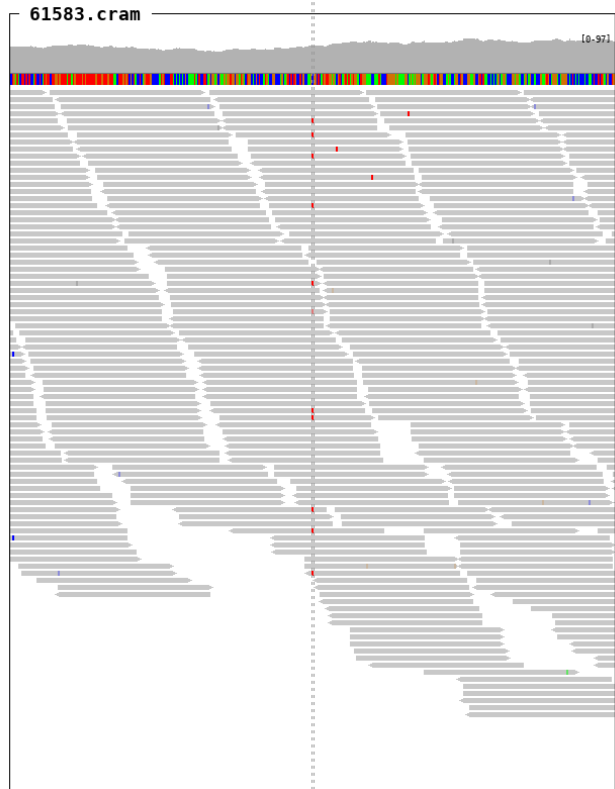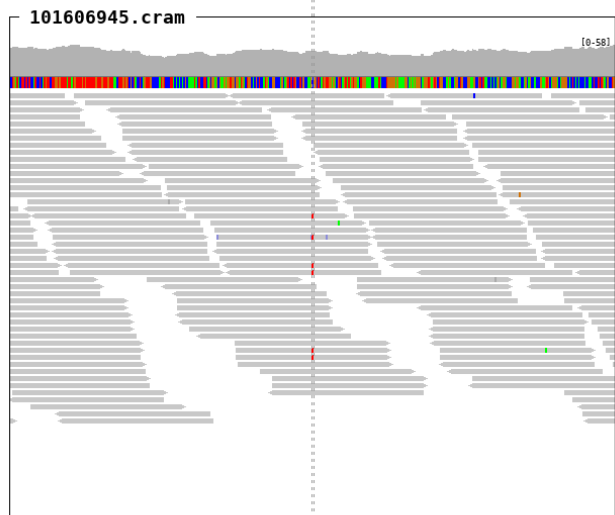

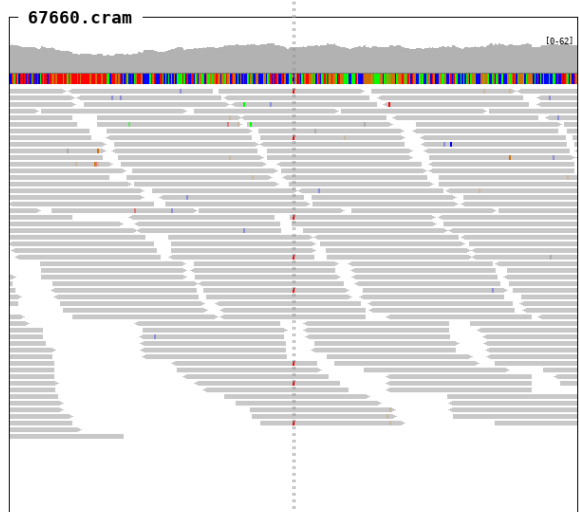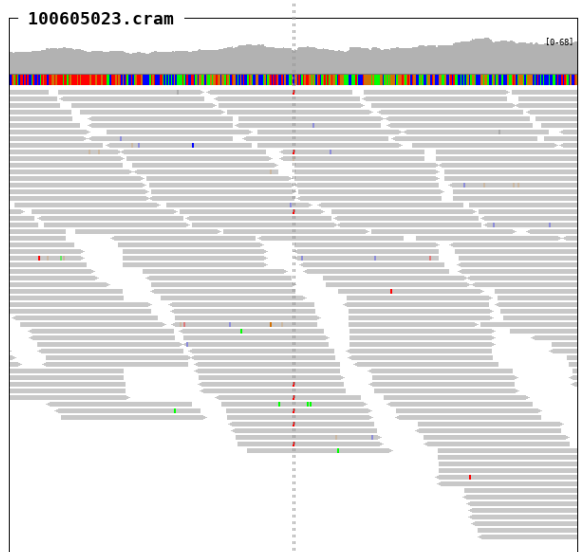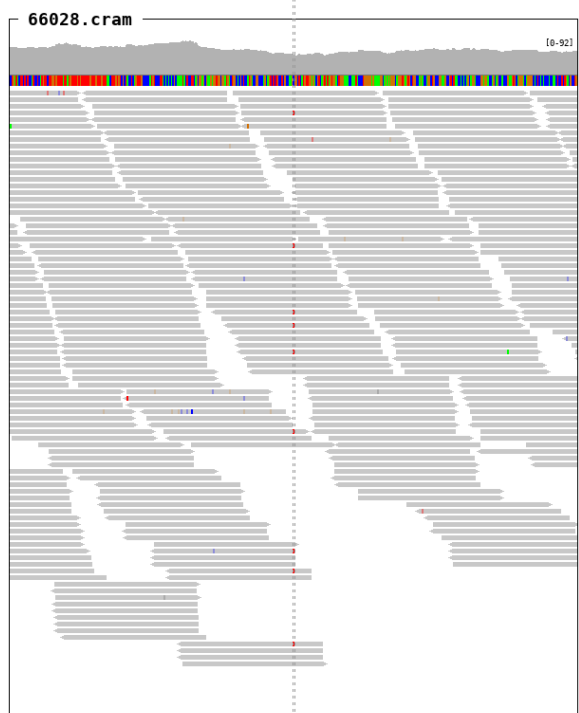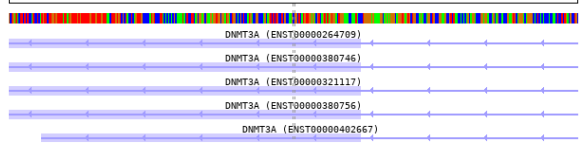

10.5. chr2\_25234374\_G/A

| SampleID  | Variants (GRCh38) | Ref_depth | Alt_depth | Gene          | Consequence      |
|-----------|-------------------|-----------|-----------|---------------|------------------|
| 100607013 | chr2_25234374_G/A | 36        | 3         | <i>DNMT3A</i> | missense_variant |
| 102108094 | chr2_25234374_G/A | 32        | 5         | <i>DNMT3A</i> | missense_variant |
| 10312845  | chr2_25234374_G/A | 33        | 6         | <i>DNMT3A</i> | missense_variant |
| 110103185 | chr2_25234374_G/A | 36        | 3         | <i>DNMT3A</i> | missense_variant |
| 11110240  | chr2_25234374_G/A | 34        | 3         | <i>DNMT3A</i> | missense_variant |
| 112303031 | chr2_25234374_G/A | 32        | 3         | <i>DNMT3A</i> | missense_variant |
| 112401482 | chr2_25234374_G/A | 35        | 3         | <i>DNMT3A</i> | missense_variant |

chr2 25,234,250 25,234,400 25,234,550

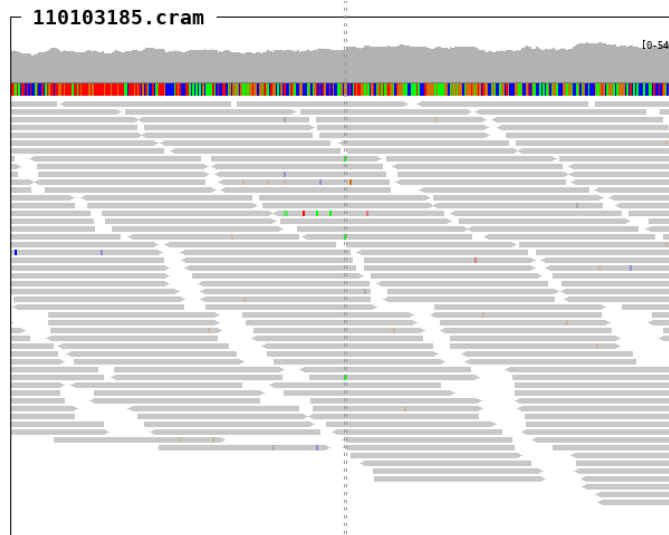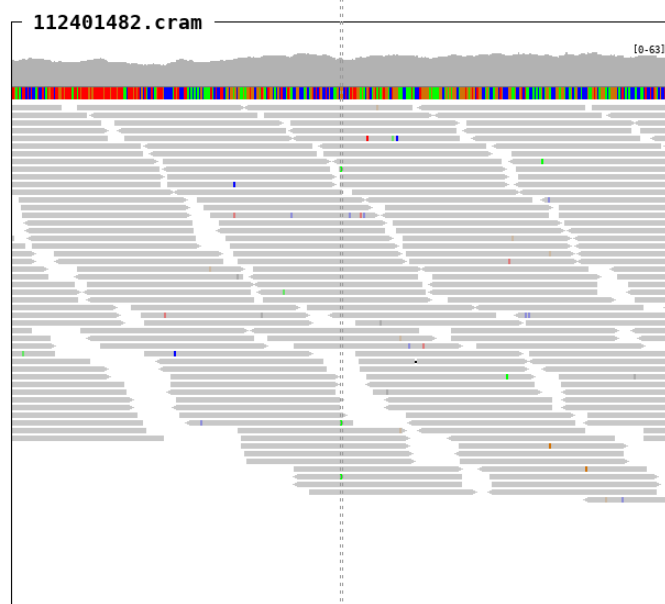

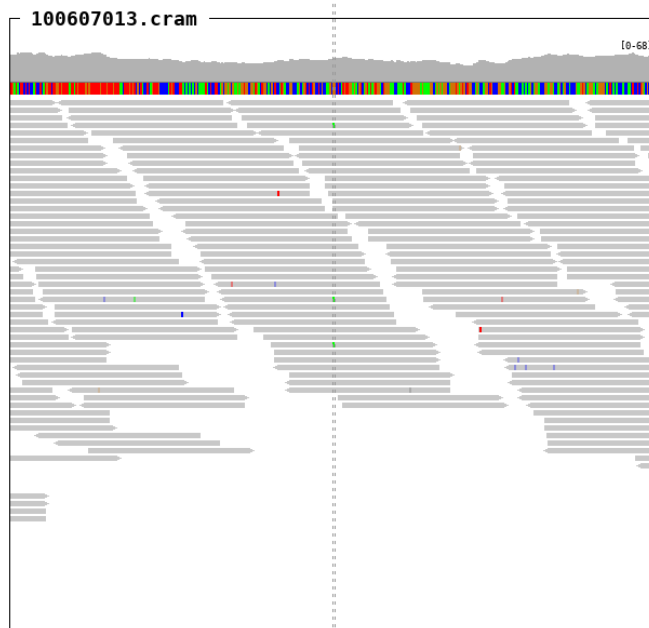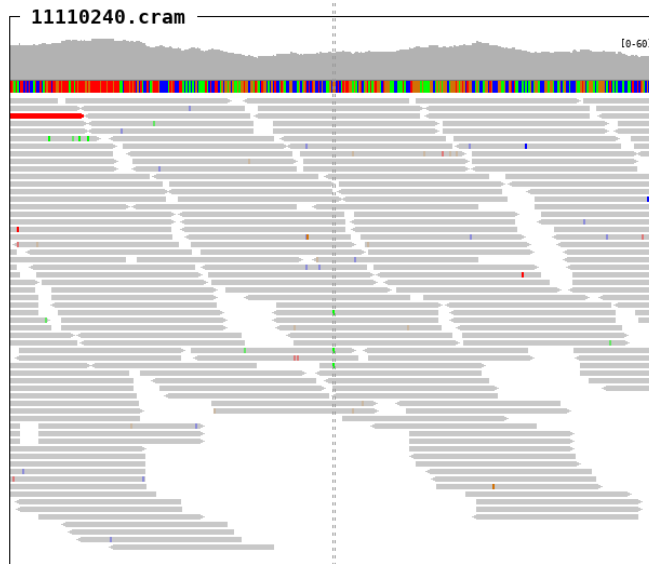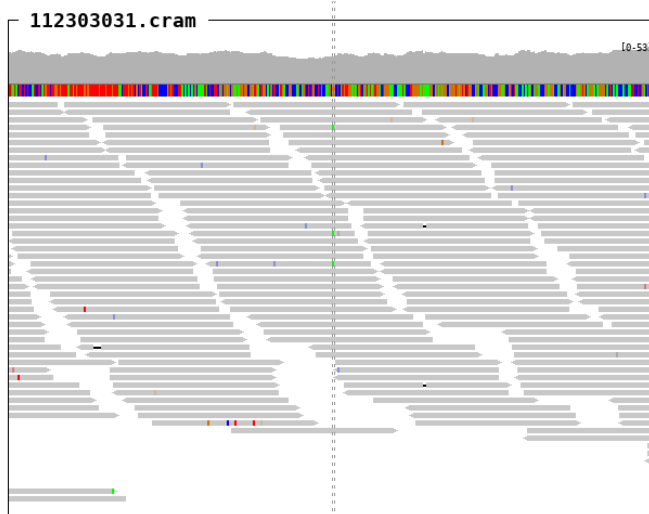

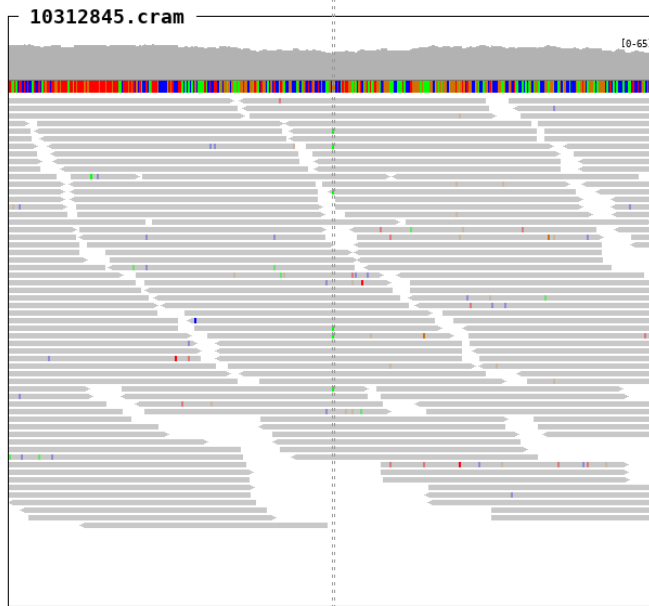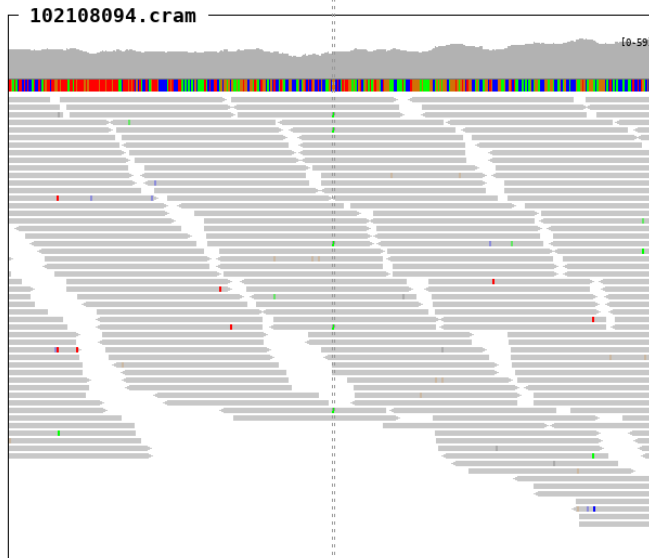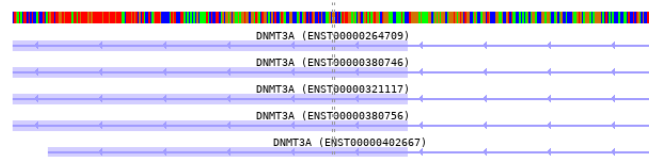

10.6. chr2\_25234374\_G/A/T

| SampleID  | Variants (GRCh38)   | Ref_depth | Alt_depth | Gene          | Consequence      |
|-----------|---------------------|-----------|-----------|---------------|------------------|
| 102106509 | chr2_25234374_G/A/T | 28        | 3         | <i>DNMT3A</i> | missense_variant |
| 10642385  | chr2_25234374_G/A/T | 26        | 4         | <i>DNMT3A</i> | missense_variant |

chr2 25,234,250 25,234,400 25,234,550

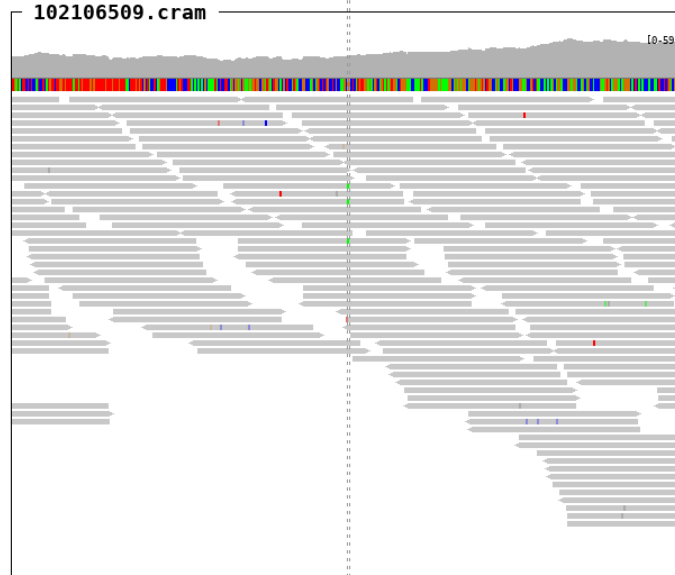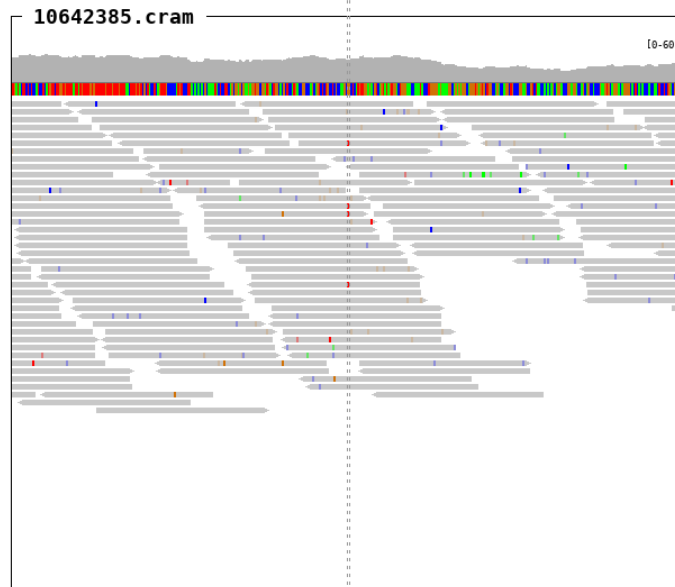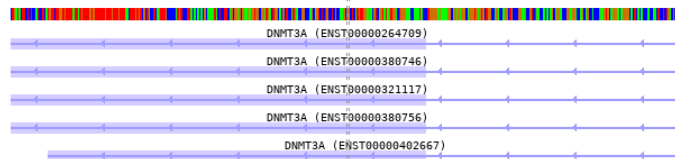

10.7. chr2\_25234374\_G/T/A

| SampleID | Variants (GRCh38)   | Ref_depth | Alt_depth | Gene   | Consequence      |
|----------|---------------------|-----------|-----------|--------|------------------|
| 11311063 | chr2_25234374_G/T/A | 38        | 3         | DNMT3A | missense_variant |
| 11311231 | chr2_25234374_G/T/A | 32        | 7         | DNMT3A | missense_variant |

chr2 25,234,250 25,234,400 25,234,550

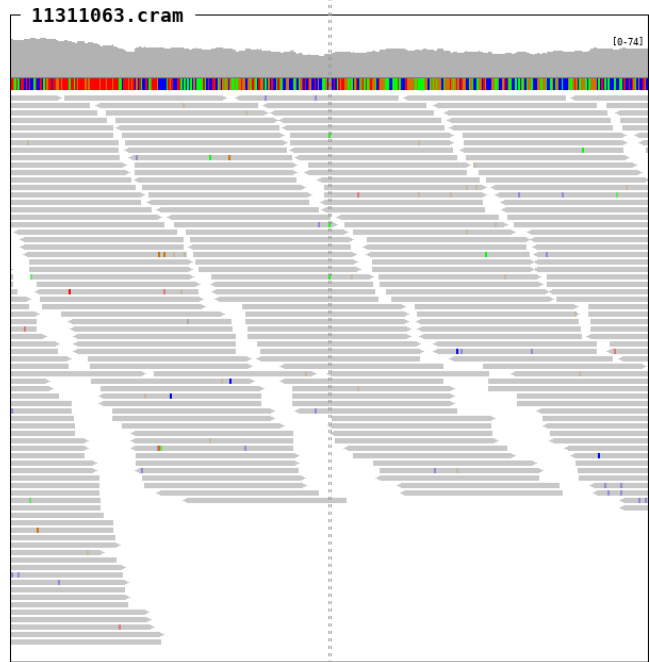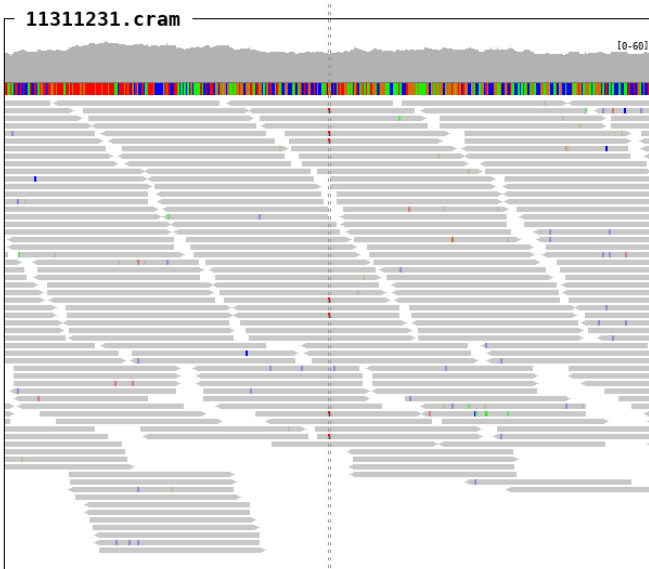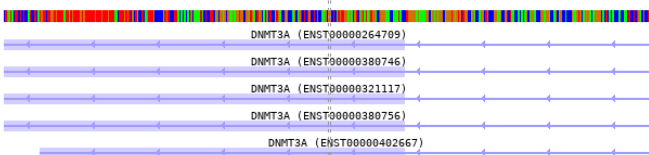

10.8. chr2\_25234422\_T/C

| SampleID  | Variants (GRCh38) | Ref_depth | Alt_depth | Gene   | Consequence             |
|-----------|-------------------|-----------|-----------|--------|-------------------------|
| 101610080 | chr2_25234422_T/C | 32        | 4         | DNMT3A | splice_acceptor_variant |

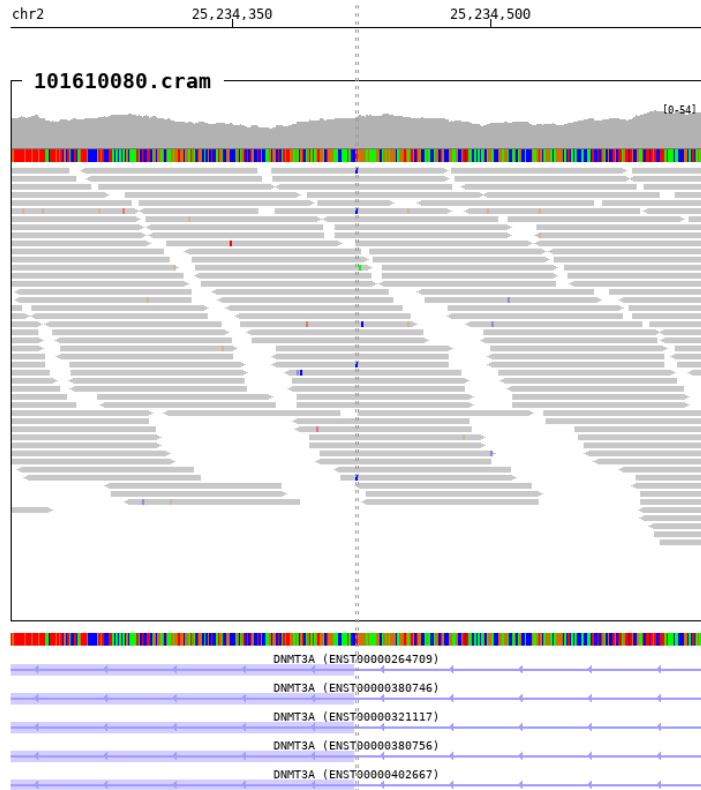

10.9. chr2\_25235711\_C/A

| SampleID  | Variants (GRCh38) | Ref_depth | Alt_depth | Gene   | Consequence |
|-----------|-------------------|-----------|-----------|--------|-------------|
| 110108518 | chr2_25235711_C/A | 47        | 4         | DNMT3A | stop_gained |

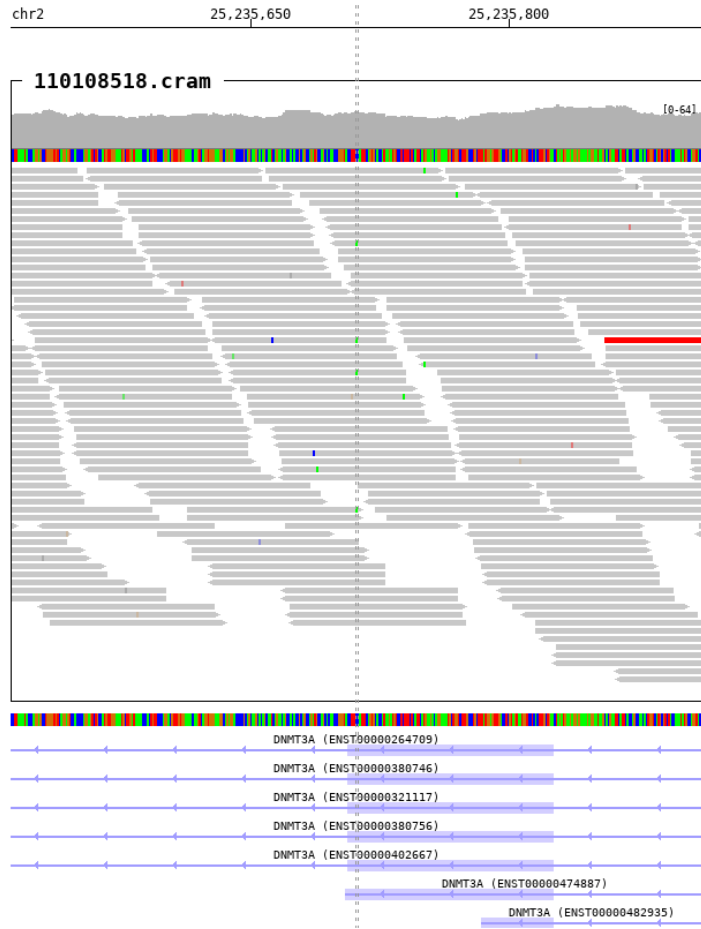

10.10. chr2\_25235726\_A/G

| SampleID  | Variants (GRCh38) | Ref_depth | Alt_depth | Gene   | Consequence      |
|-----------|-------------------|-----------|-----------|--------|------------------|
| 102102926 | chr2_25235726_A/G | 37        | 6         | DNMT3A | missense_variant |
| 10310494  | chr2_25235726_A/G | 29        | 4         | DNMT3A | missense_variant |

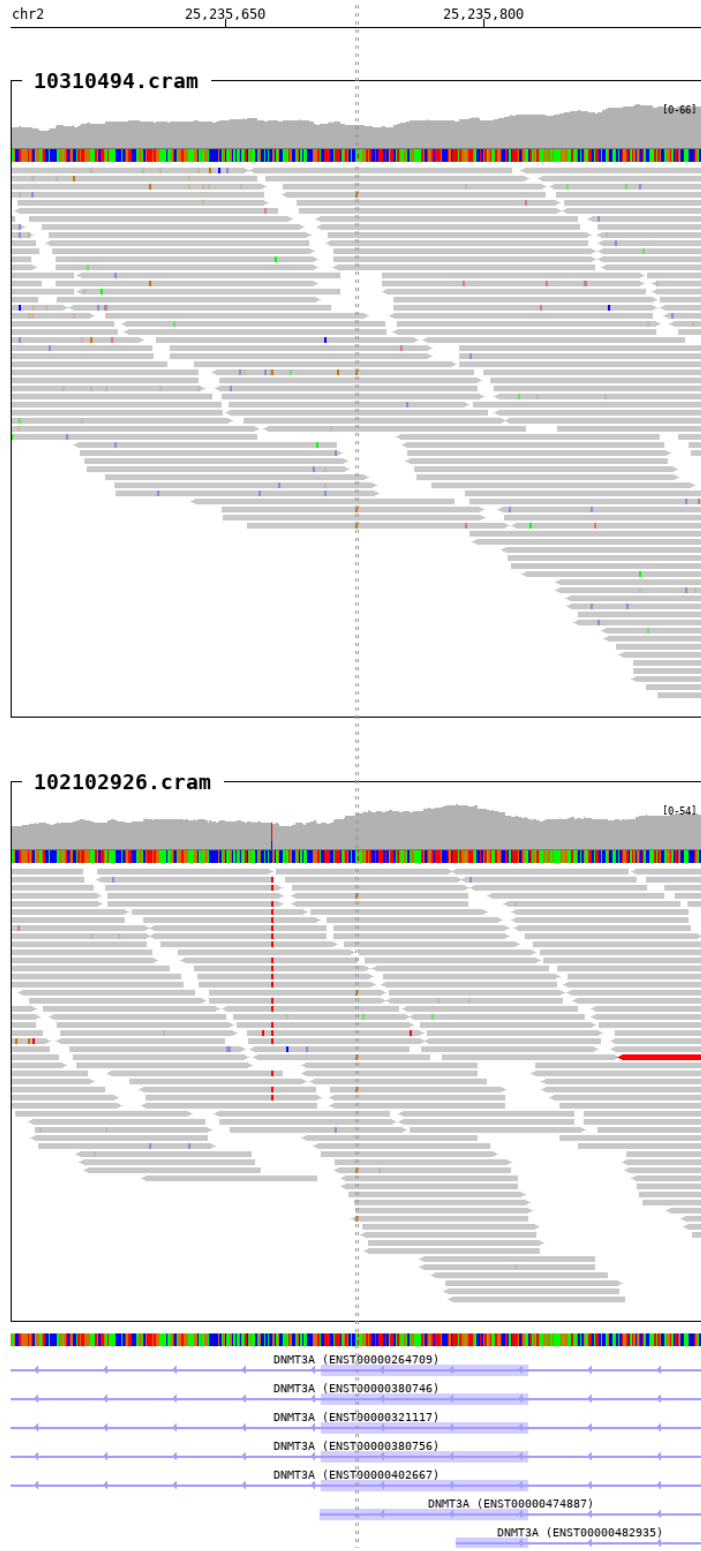

10.11. chr2\_25235755\_C/-

| SampleID  | Variants (GRCh38) | Ref_depth | Alt_depth | Gene   | Consequence        |
|-----------|-------------------|-----------|-----------|--------|--------------------|
| 101107334 | chr2_25235755_C/- | 43        | 4         | DNMT3A | frameshift_variant |

chr2 25,235,650 25,235,800 25,235

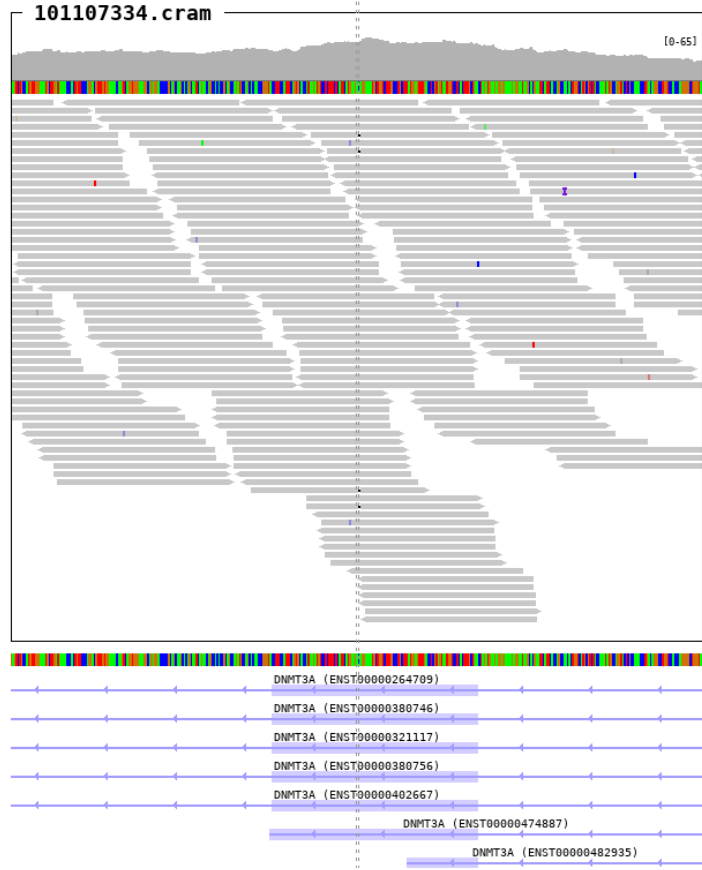

10.12. chr2\_25235779\_G/-

| SampleID  | Variants (GRCh38) | Ref_depth | Alt_depth | Gene   | Consequence        |
|-----------|-------------------|-----------|-----------|--------|--------------------|
| 112301943 | chr2_25235779_G/- | 44        | 12        | DNMT3A | frameshift_variant |

chr2 25,235,650 25,235,800 25,235,950

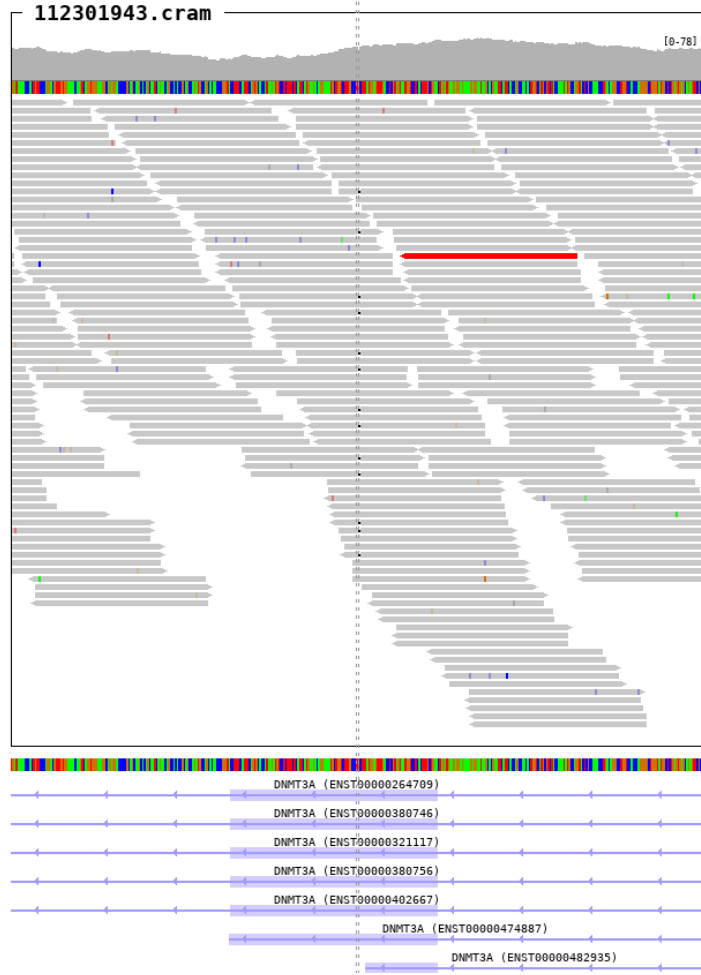

10.13. chr2\_25235783\_T/G

| SampleID  | Variants (GRCh38) | Ref_depth | Alt_depth | Gene   | Consequence      |
|-----------|-------------------|-----------|-----------|--------|------------------|
| 110107148 | chr2_25235783_T/G | 48        | 5         | DNMT3A | missense_variant |

chr2 25,235,650 25,235,800 25,235,950

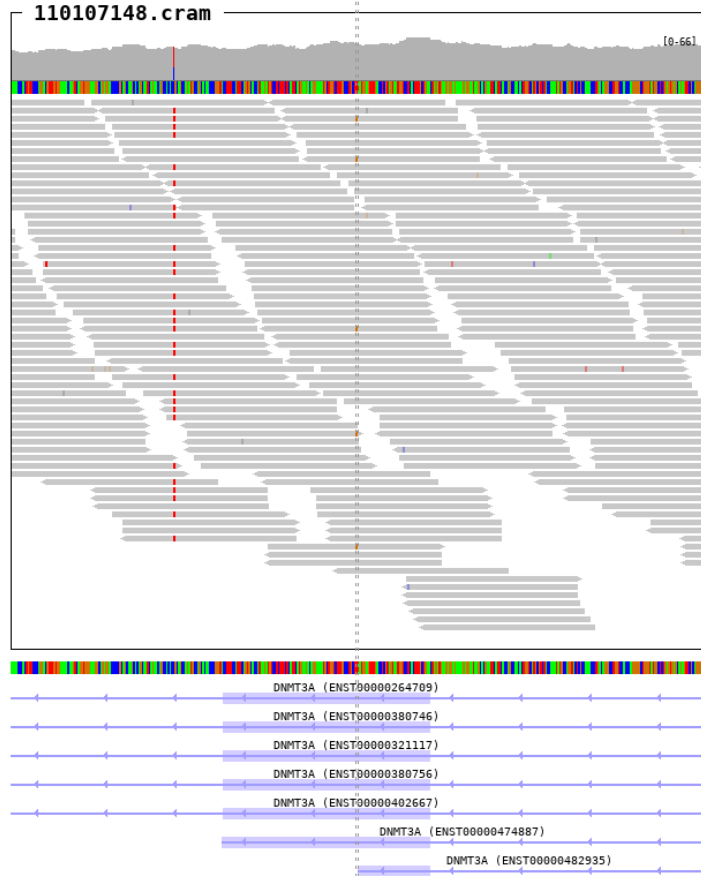

10.14. chr2\_25235821\_TGAACTAGA/-

| SampleID | Variants (GRCh38)         | Ref_depth | Alt_depth | Gene   | Consequence             |
|----------|---------------------------|-----------|-----------|--------|-------------------------|
| 12390071 | chr2_25235821_TGAACTAGA/- | 42        | 3         | DNMT3A | splice_acceptor_variant |

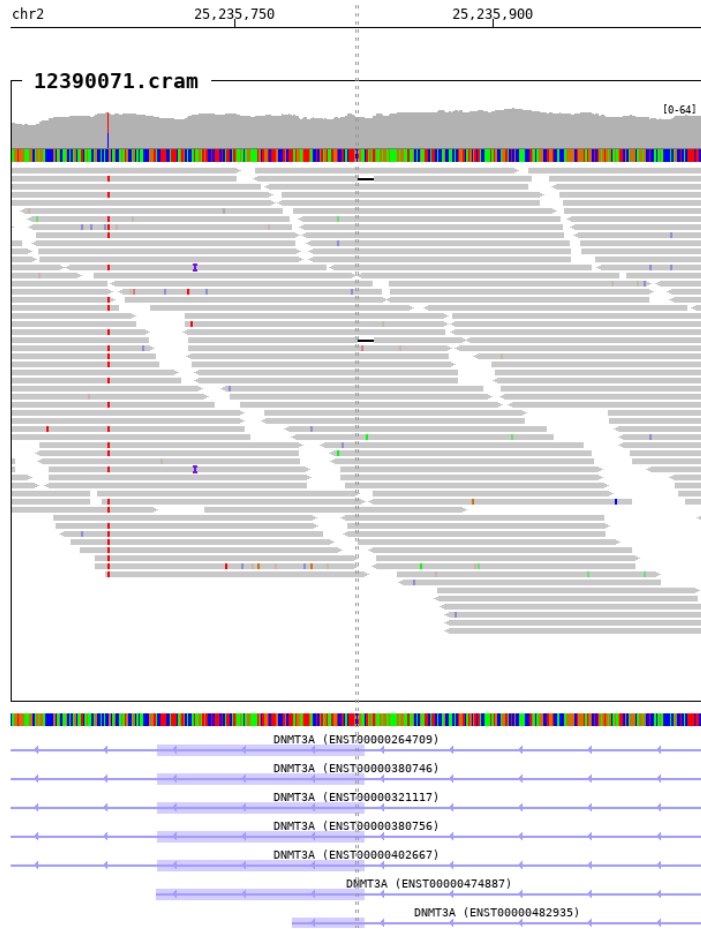

10.15. chr2\_25235822\_G/-

| SampleID  | Variants (GRCh38) | Ref_depth | Alt_depth | Gene   | Consequence        |
|-----------|-------------------|-----------|-----------|--------|--------------------|
| 102107671 | chr2_25235822_G/- | 40        | 4         | DNMT3A | frameshift_variant |

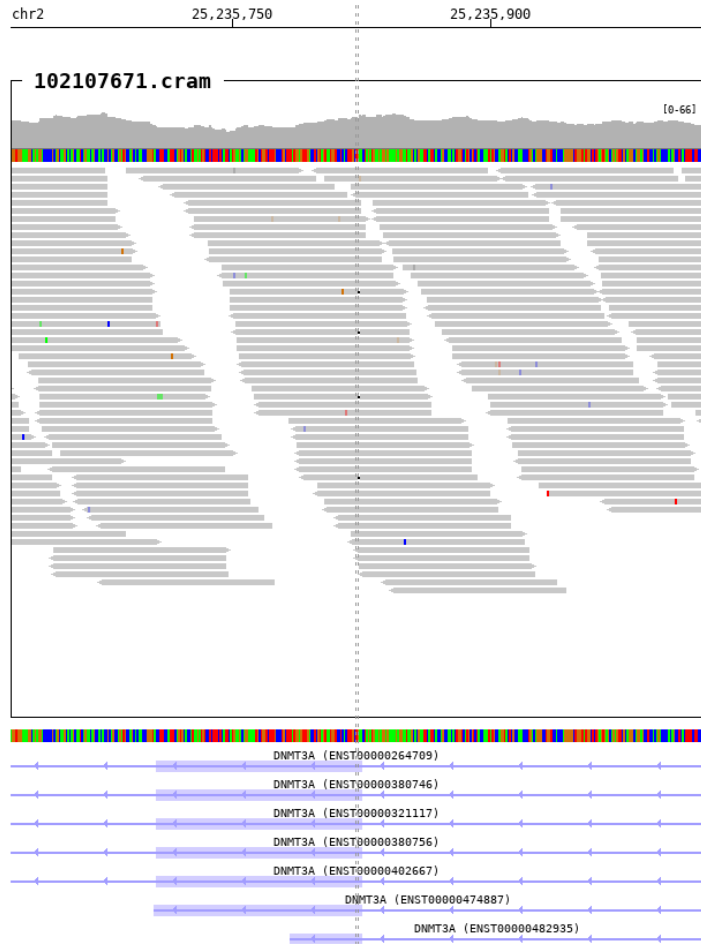

10.16. chr2\_25235826\_C/T

| SampleID  | Variants (GRCh38) | Ref_depth | Alt_depth | Gene   | Consequence             |
|-----------|-------------------|-----------|-----------|--------|-------------------------|
| 101609036 | chr2_25235826_C/T | 46        | 3         | DNMT3A | splice_acceptor_variant |

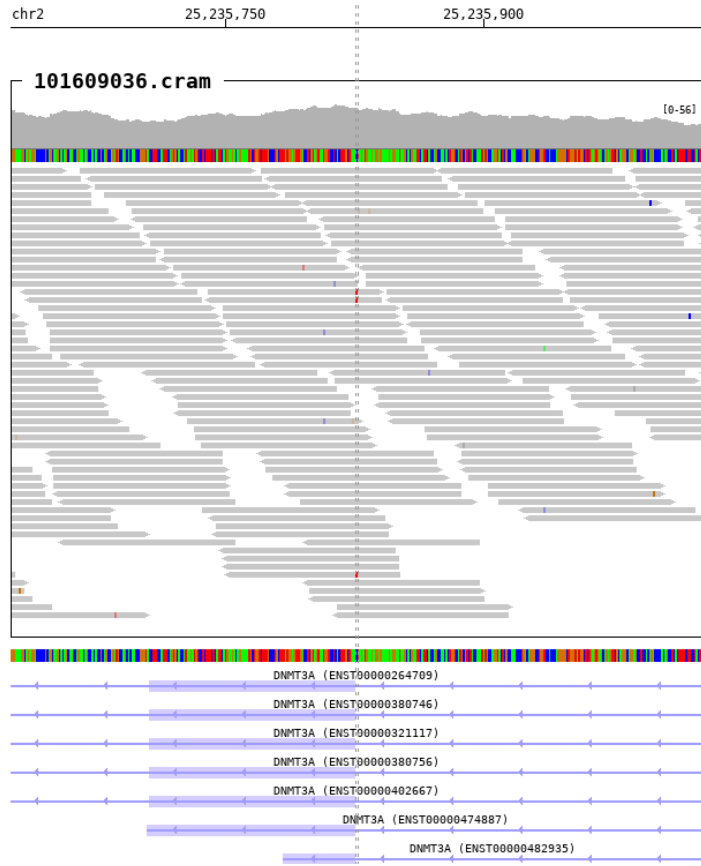

10.17. chr2\_25235827\_T/C

| SampleID  | Variants (GRCh38) | Ref_depth | Alt_depth | Gene          | Consequence             |
|-----------|-------------------|-----------|-----------|---------------|-------------------------|
| 101100350 | chr2_25235827_T/C | 30        | 4         | <i>DNMT3A</i> | splice_acceptor_variant |
| 10302492  | chr2_25235827_T/C | 47        | 6         | <i>DNMT3A</i> | splice_acceptor_variant |
| 64313     | chr2_25235827_T/C | 41        | 3         | <i>DNMT3A</i> | splice_acceptor_variant |

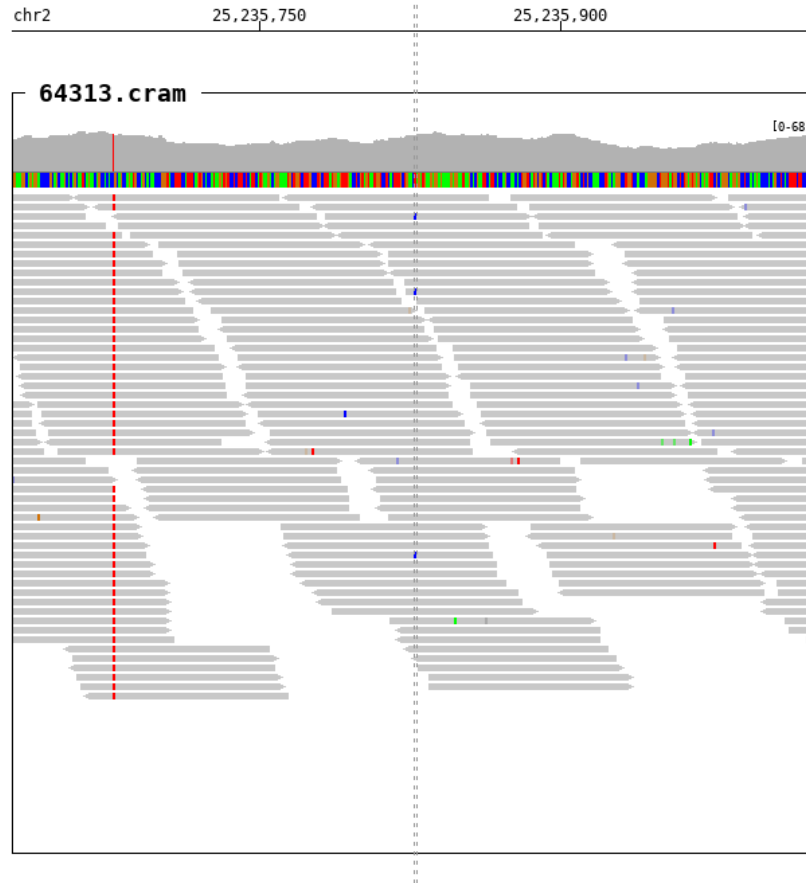

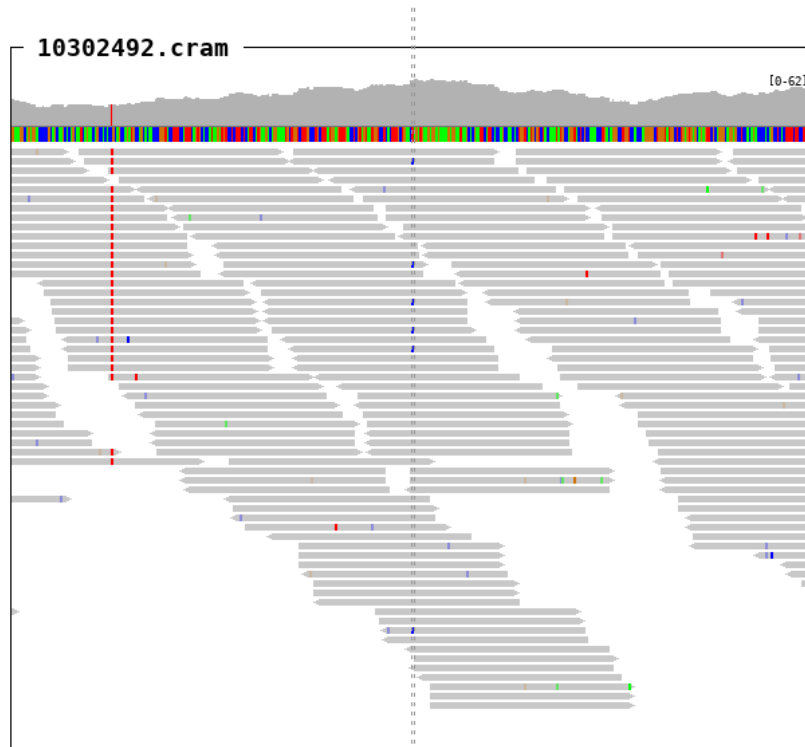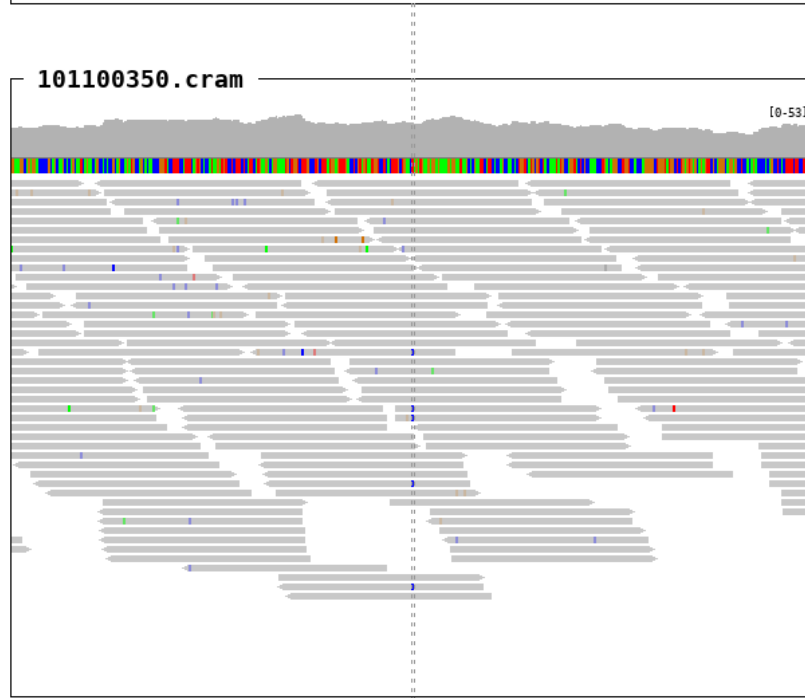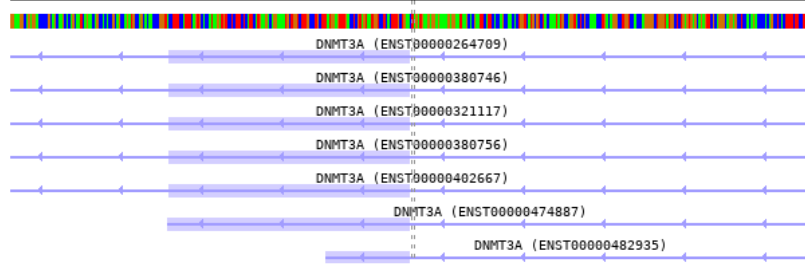

10.18. chr2\_25236935\_CC/AT

| SampleID  | Variants (GRCh38)   | Ref_depth | Alt_depth | Gene   | Consequence          |
|-----------|---------------------|-----------|-----------|--------|----------------------|
| 110100675 | chr2_25236935_CC/AT | 37        | 4         | DNMT3A | splice_donor_variant |

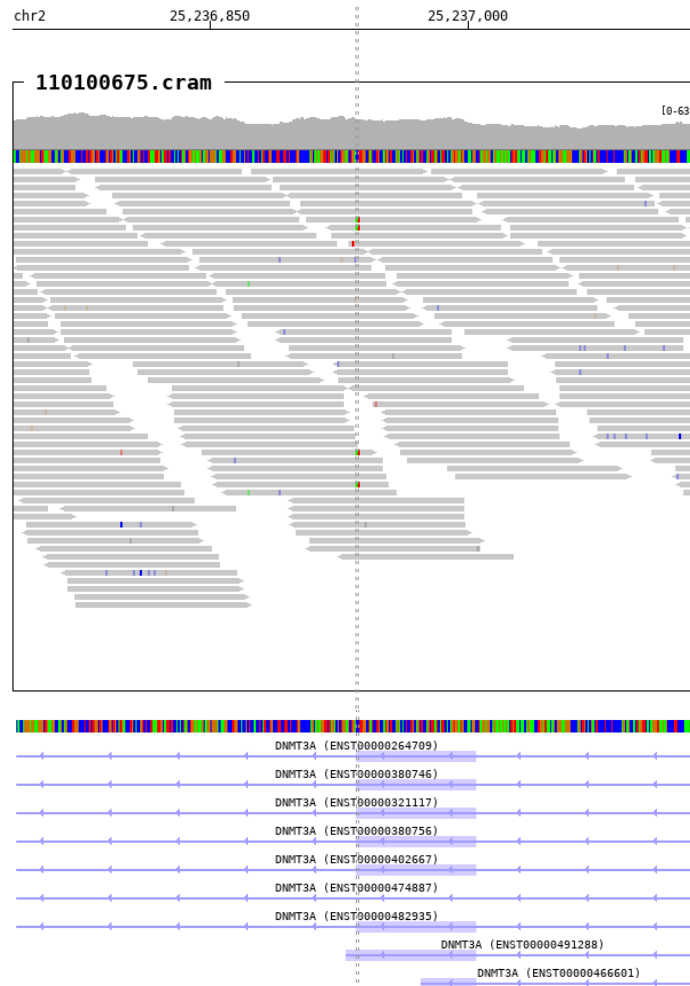

10.19. chr2\_25236935\_C/T

| SampleID  | Variants (GRCh38) | Ref_depth | Alt_depth | Gene          | Consequence          |
|-----------|-------------------|-----------|-----------|---------------|----------------------|
| 100601846 | chr2_25236935_C/T | 43        | 5         | <i>DNMT3A</i> | splice_donor_variant |
| 61616     | chr2_25236935_C/T | 34        | 6         | <i>DNMT3A</i> | splice_donor_variant |

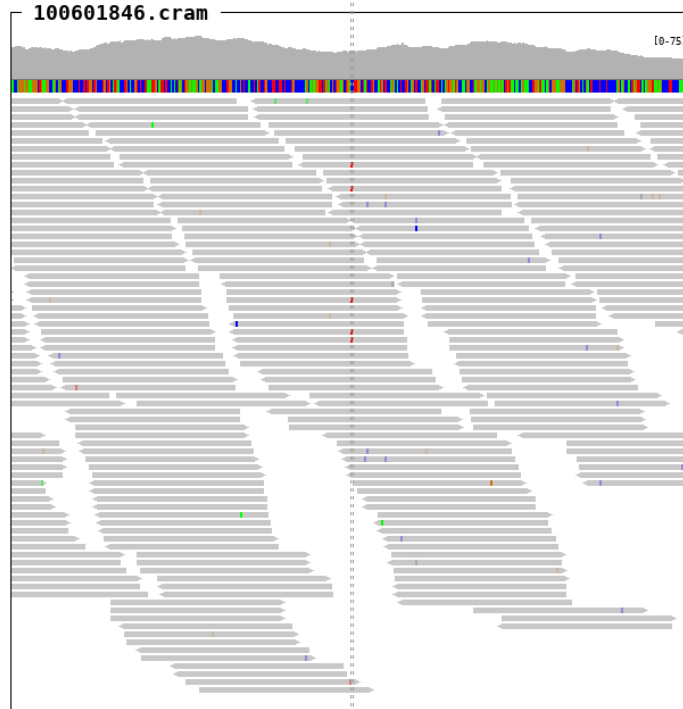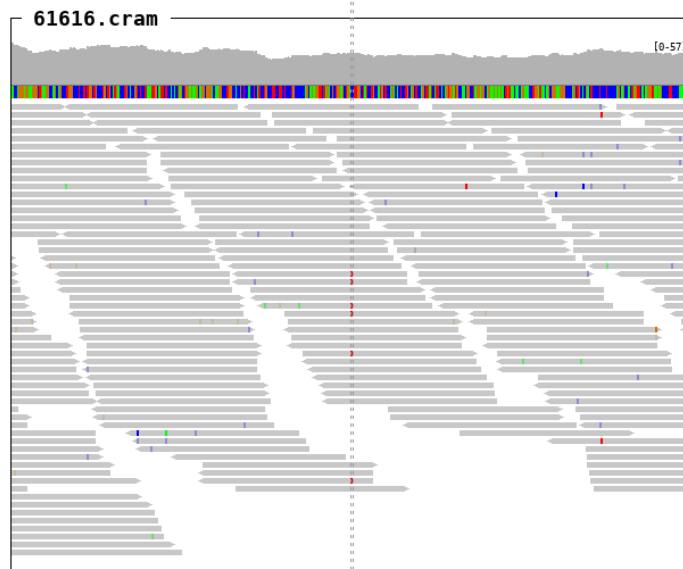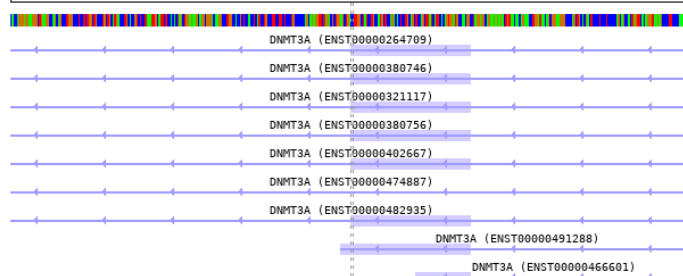

10.20. chr2\_25236937\_T/C

| SampleID | Variants (GRCh38) | Ref_depth | Alt_depth | Gene   | Consequence      |
|----------|-------------------|-----------|-----------|--------|------------------|
| 11310873 | chr2_25236937_T/C | 20        | 3         | DNMT3A | missense_variant |

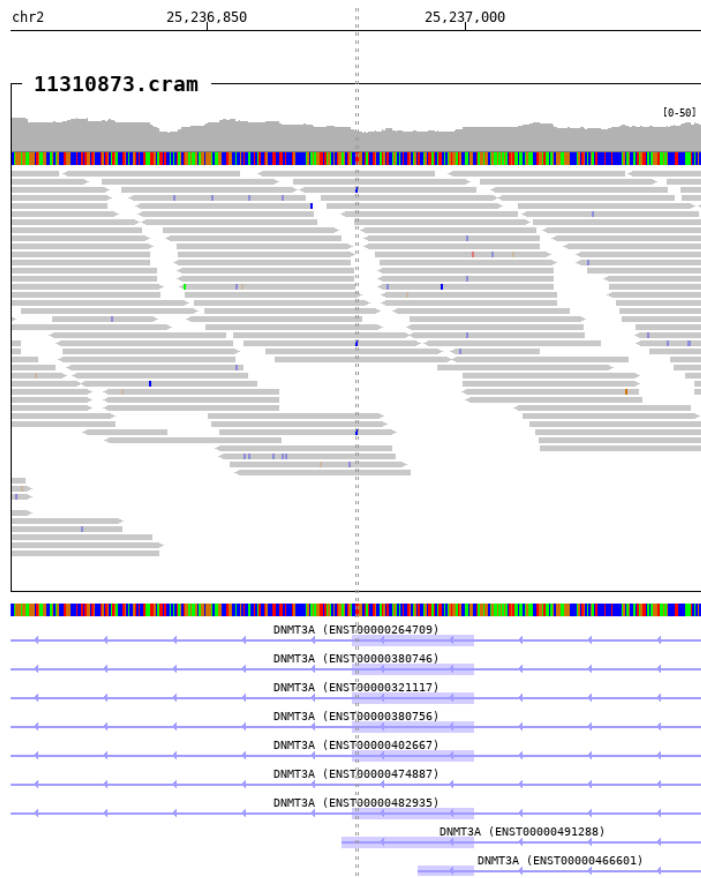

10.21. chr2\_25236960\_-/A

| SampleID  | Variants (GRCh38) | Ref_depth | Alt_depth | Gene   | Consequence        |
|-----------|-------------------|-----------|-----------|--------|--------------------|
| 100604541 | chr2_25236960_-/A | 39        | 6         | DNMT3A | frameshift_variant |

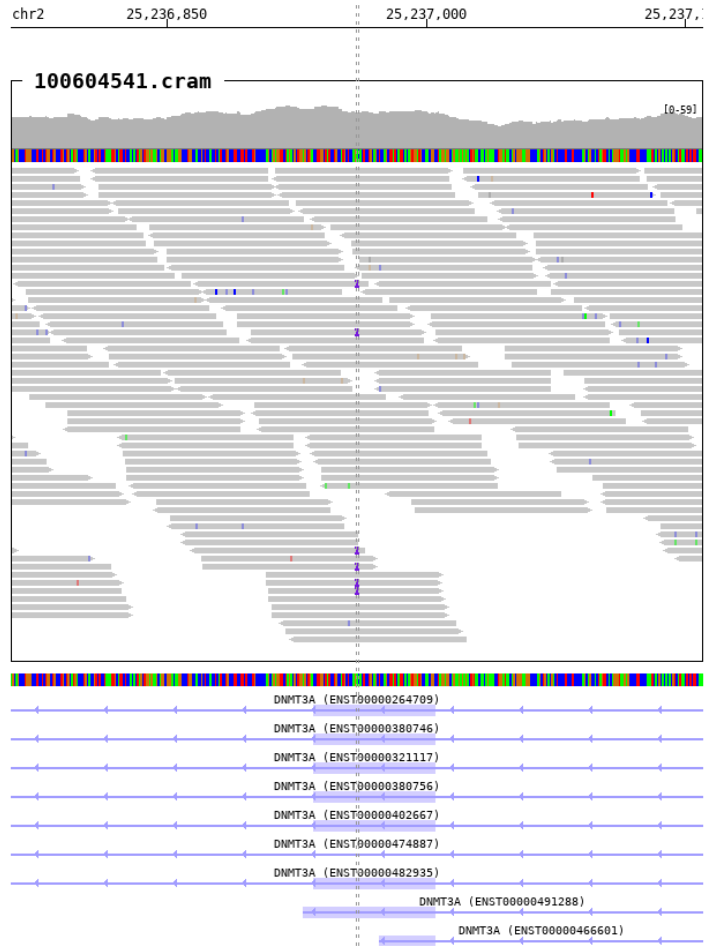

10.22. chr2\_25236973\_C/-

| SampleID  | Variants (GRCh38) | Ref_depth | Alt_depth | Gene   | Consequence        |
|-----------|-------------------|-----------|-----------|--------|--------------------|
| 112404951 | chr2_25236973_C/- | 29        | 6         | DNMT3A | frameshift_variant |

chr2 25,236,850 25,237,000 25,237,150

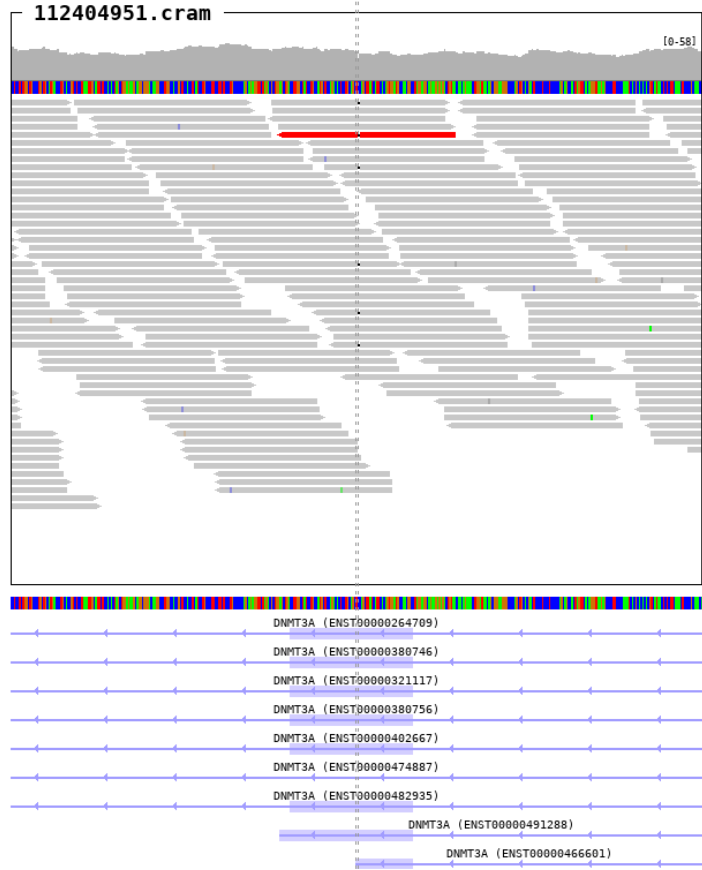

10.23. chr2\_25239128\_A/G

| SampleID  | Variants (GRCh38) | Ref_depth | Alt_depth | Gene   | Consequence          |
|-----------|-------------------|-----------|-----------|--------|----------------------|
| 100610071 | chr2_25239128_A/G | 32        | 7         | DNMT3A | splice_donor_variant |

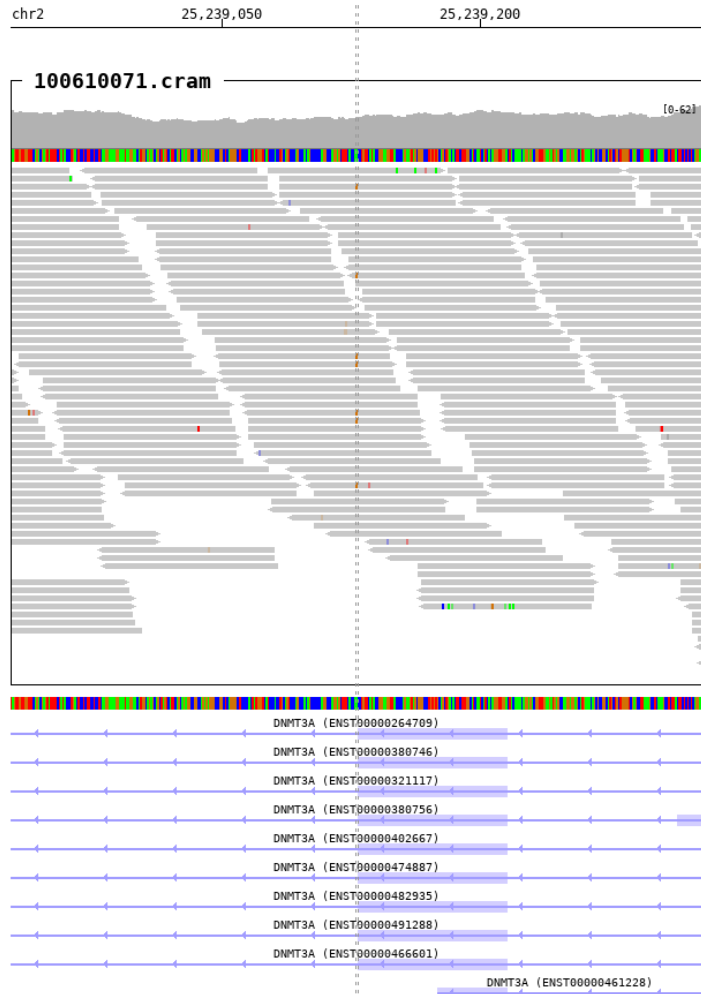

10.24. chr2\_25239131\_G/-

| SampleID | Variants (GRCh38) | Ref_depth | Alt_depth | Gene   | Consequence        |
|----------|-------------------|-----------|-----------|--------|--------------------|
| 10512084 | chr2_25239131_G/- | 51        | 4         | DNMT3A | frameshift_variant |

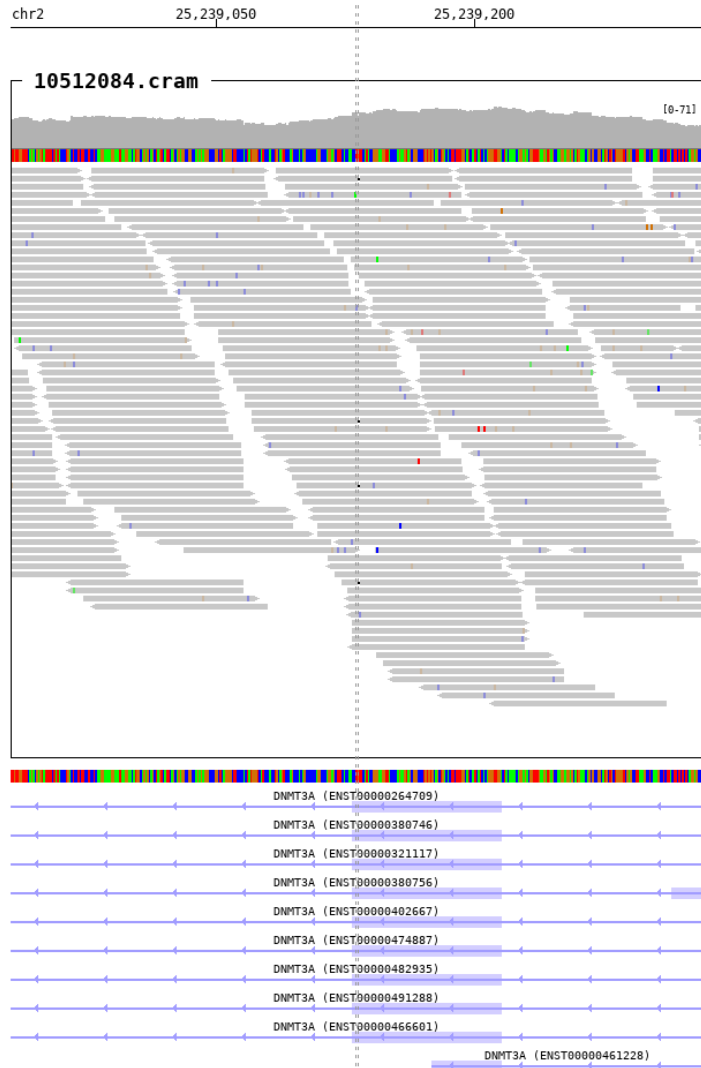

10.25. chr2\_25239140\_G/-

| SampleID | Variants (GRCh38) | Ref_depth | Alt_depth | Gene   | Consequence        |
|----------|-------------------|-----------|-----------|--------|--------------------|
| 10310525 | chr2_25239140_G/- | 40        | 4         | DNMT3A | frameshift_variant |

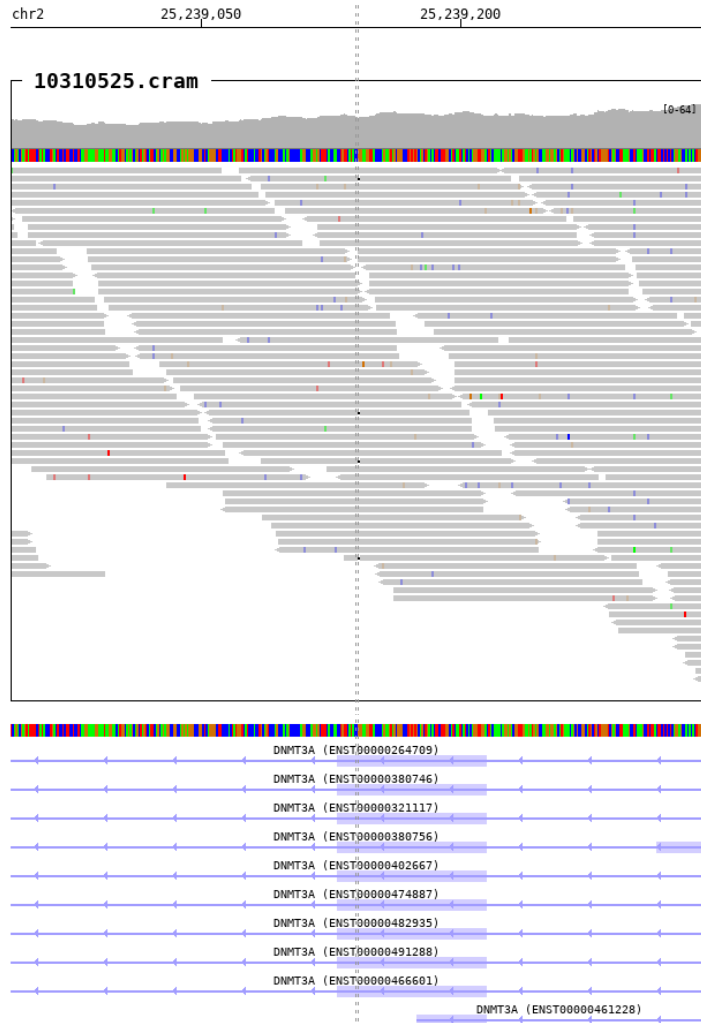

10.26. chr2\_25239143\_G/A

| SampleID | Variants (GRCh38) | Ref_depth | Alt_depth | Gene   | Consequence      |
|----------|-------------------|-----------|-----------|--------|------------------|
| 61668    | chr2_25239143_G/A | 38        | 4         | DNMT3A | missense_variant |

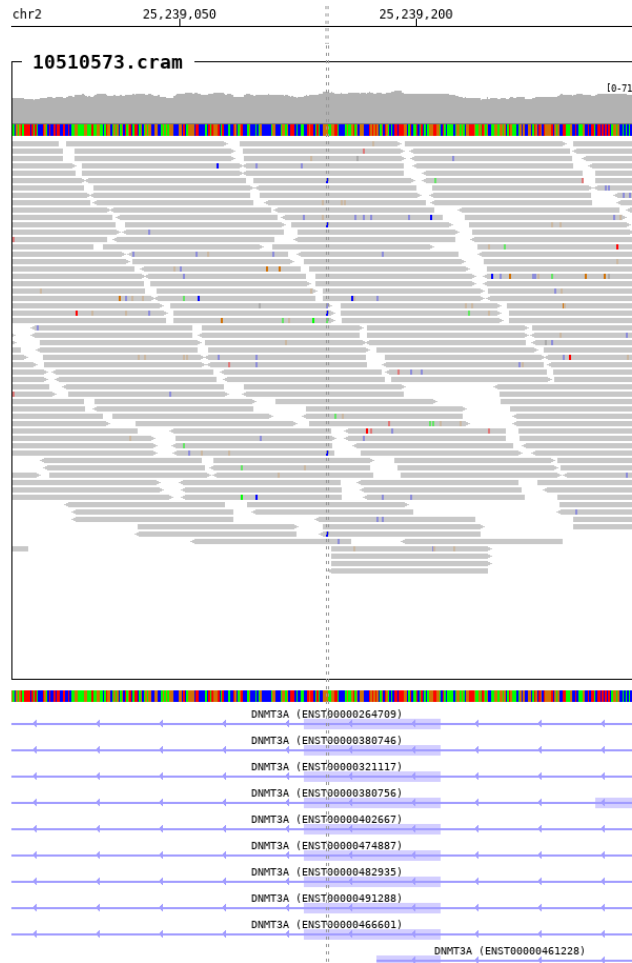

10.27. chr2\_25239146\_GTTA/-

| SampleID  | Variants (GRCh38)    | Ref_depth | Alt_depth | Gene   | Consequence        |
|-----------|----------------------|-----------|-----------|--------|--------------------|
| 112301118 | chr2_25239146_GTTA/- | 43        | 2         | DNMT3A | frameshift_variant |

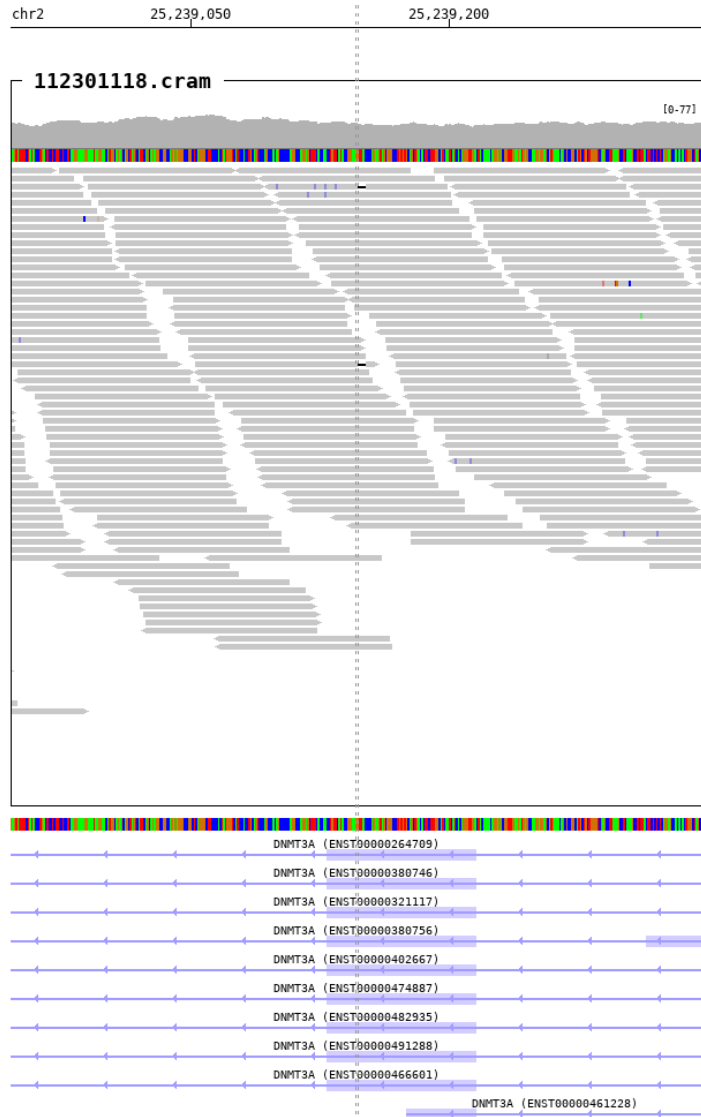

10.28. chr2\_25239151\_C/T

| SampleID  | Variants (GRCh38) | Ref_depth | Alt_depth | Gene          | Consequence      |
|-----------|-------------------|-----------|-----------|---------------|------------------|
| 110108243 | chr2_25239151_C/T | 33        | 3         | <i>DNMT3A</i> | missense_variant |

chr2 25,239,050 25,239,200 25,239,250

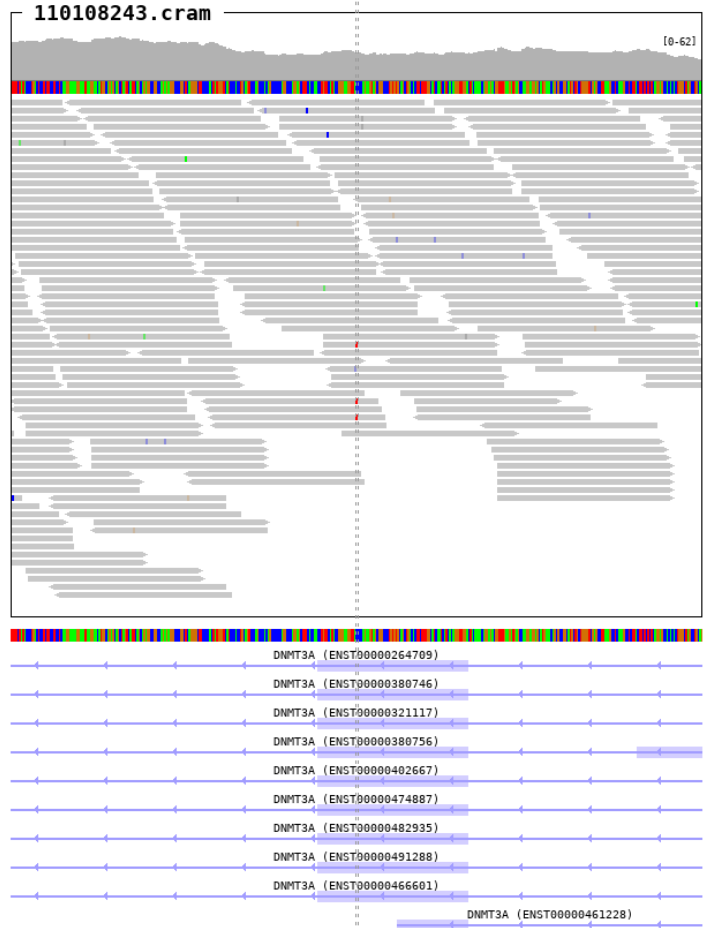

10.29. chr2\_25239154\_C/T

| SampleID  | Variants (GRCh38) | Ref_depth | Alt_depth | Gene   | Consequence |
|-----------|-------------------|-----------|-----------|--------|-------------|
| 101608504 | chr2_25239154_C/T | 31        | 5         | DNMT3A | stop_gained |

chr2 25,239,050 25,239,200 25,239

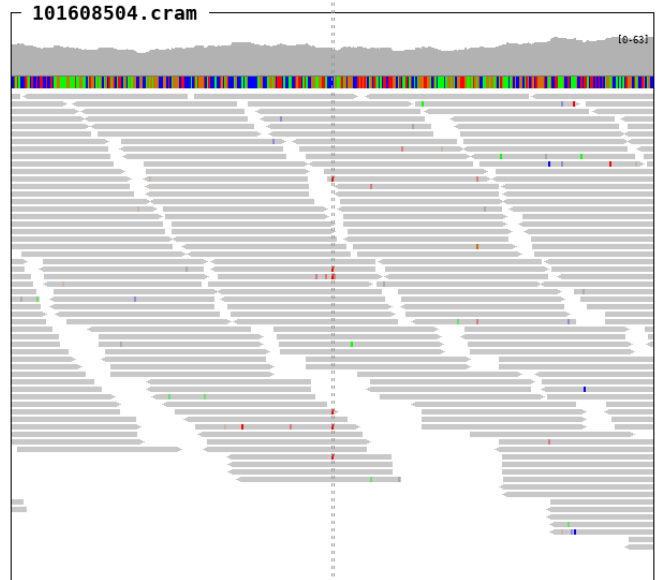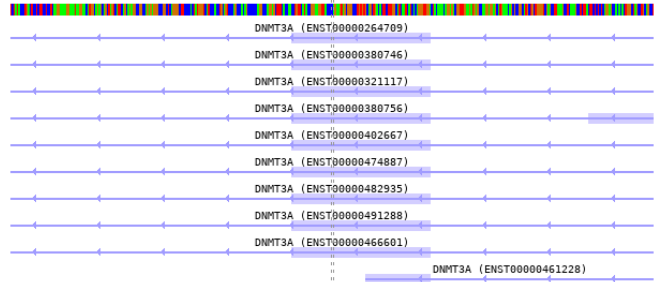

10.30. chr2\_25239157\_-/T

| SampleID | Variants (GRCh38) | Ref_depth | Alt_depth | Gene   | Consequence        |
|----------|-------------------|-----------|-----------|--------|--------------------|
| 10511928 | chr2_25239157_-/T | 25        | 4         | DNMT3A | frameshift_variant |

chr2 25,239,050 25,239,200 25,239,

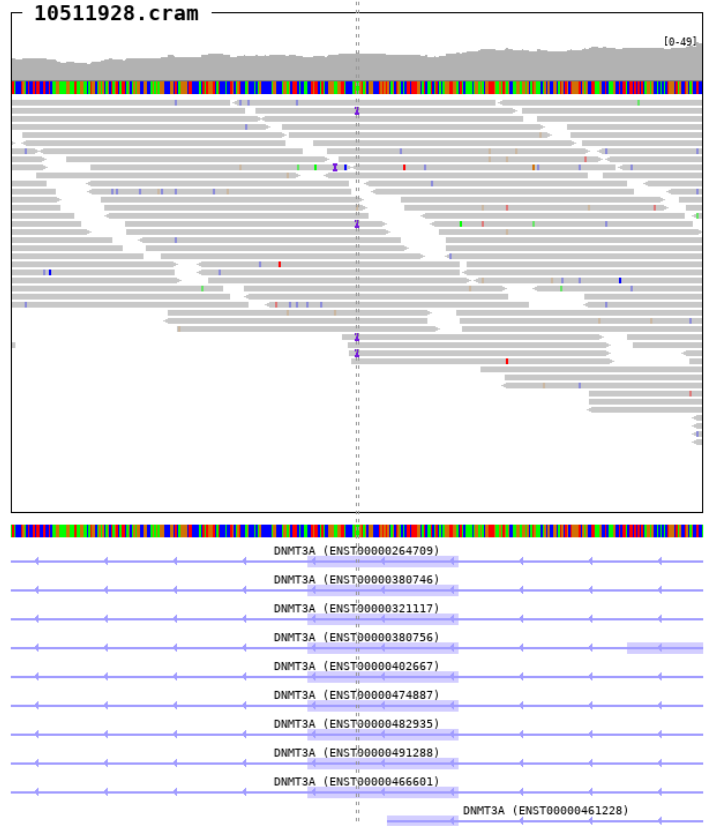

10.31. chr2\_25239159\_G/T

| SampleID  | Variants (GRCh38) | Ref_depth | Alt_depth | Gene   | Consequence |
|-----------|-------------------|-----------|-----------|--------|-------------|
| 110100879 | chr2_25239159_G/T | 41        | 14        | DNMT3A | stop_gained |

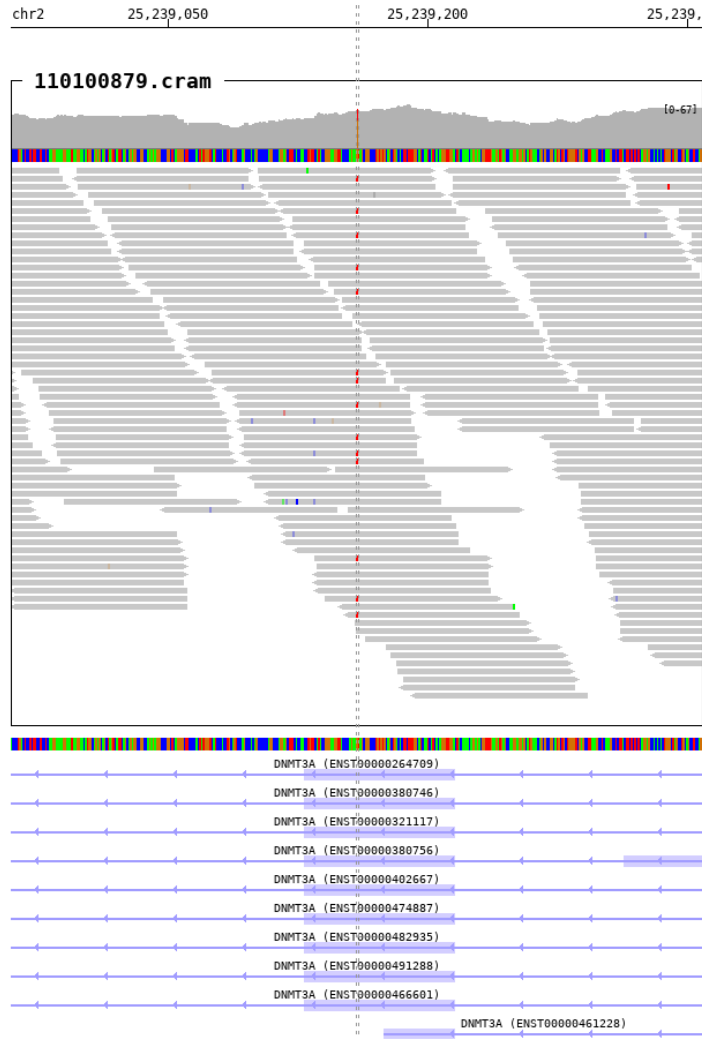

10.32. chr2\_25239199\_A/G

| SampleID | Variants (GRCh38) | Ref_depth | Alt_depth | Gene   | Consequence      |
|----------|-------------------|-----------|-----------|--------|------------------|
| 68387    | chr2_25239199_A/G | 36        | 4         | DNMT3A | missense_variant |

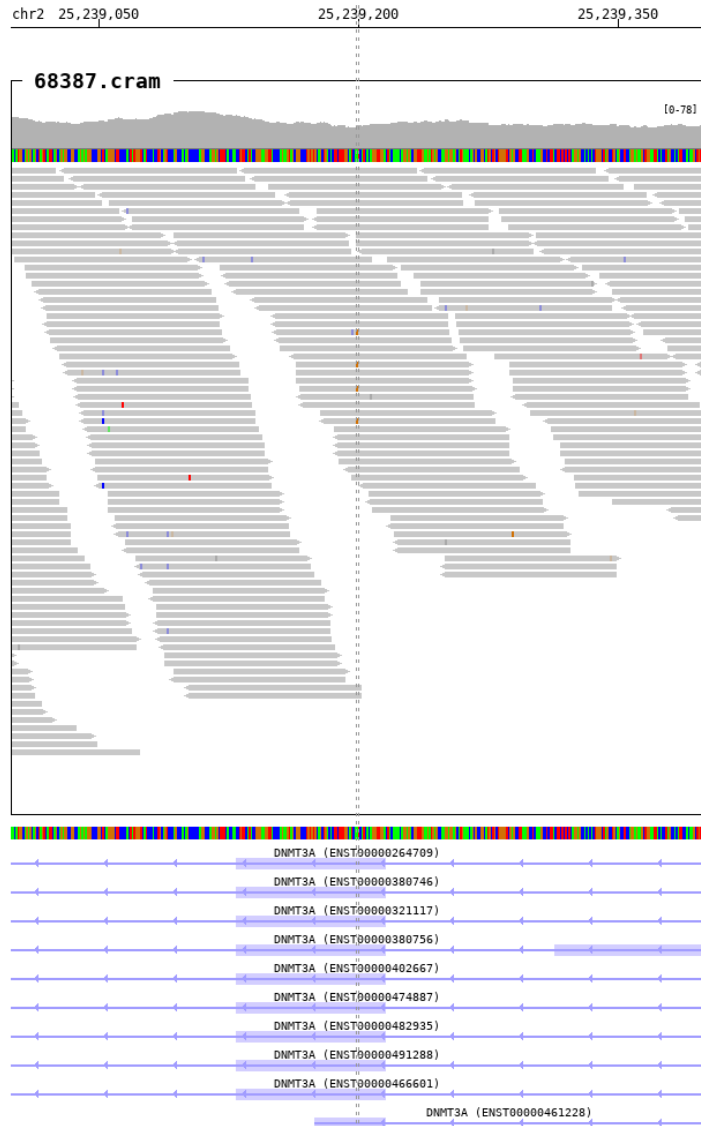

10.33. chr2\_25239216\_C/A

| SampleID | Variants (GRCh38) | Ref_depth | Alt_depth | Gene   | Consequence             |
|----------|-------------------|-----------|-----------|--------|-------------------------|
| 10310210 | chr2_25239216_C/A | 44        | 7         | DNMT3A | splice_acceptor_variant |

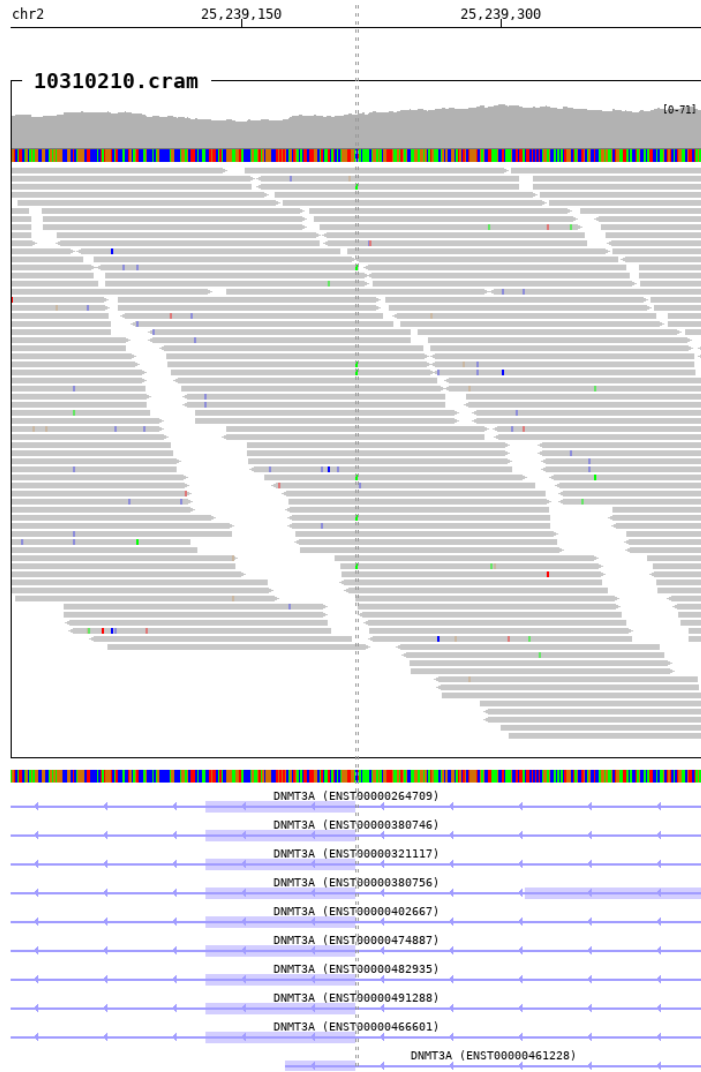

10.34. chr2\_25239217\_T/C

| SampleID  | Variants (GRCh38) | Ref_depth | Alt_depth | Gene   | Consequence             |
|-----------|-------------------|-----------|-----------|--------|-------------------------|
| 110108090 | chr2_25239217_T/C | 46        | 3         | DNMT3A | splice_acceptor_variant |

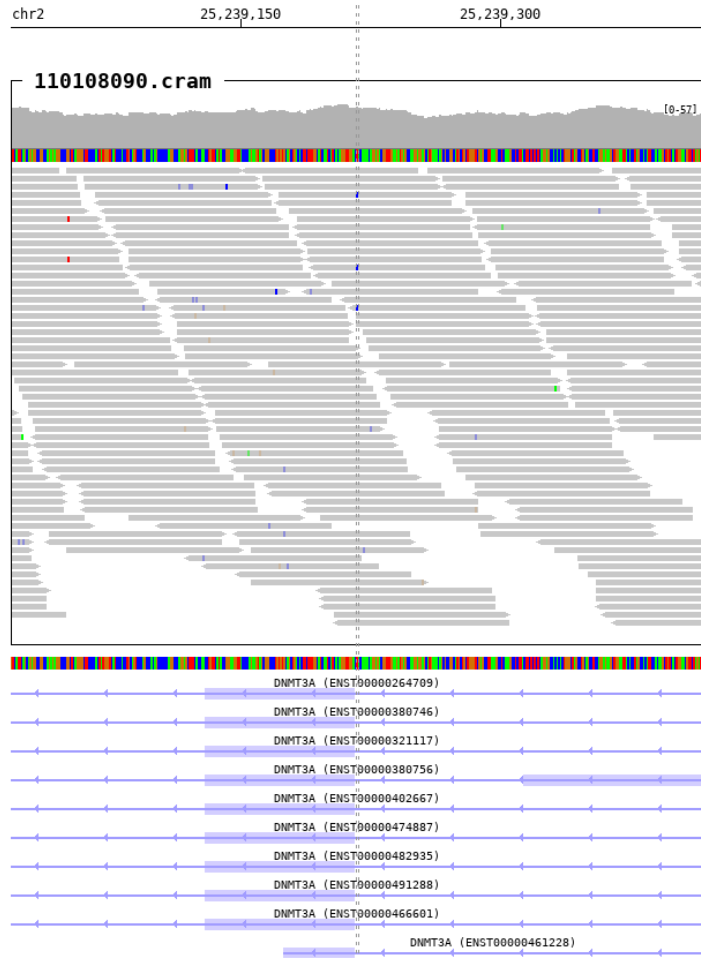

10.35. chr2\_25240301\_C/T

| SampleID  | Variants (GRCh38) | Ref_depth | Alt_depth | Gene   | Consequence          |
|-----------|-------------------|-----------|-----------|--------|----------------------|
| 110104628 | chr2_25240301_C/T | 45        | 3         | DNMT3A | splice_donor_variant |

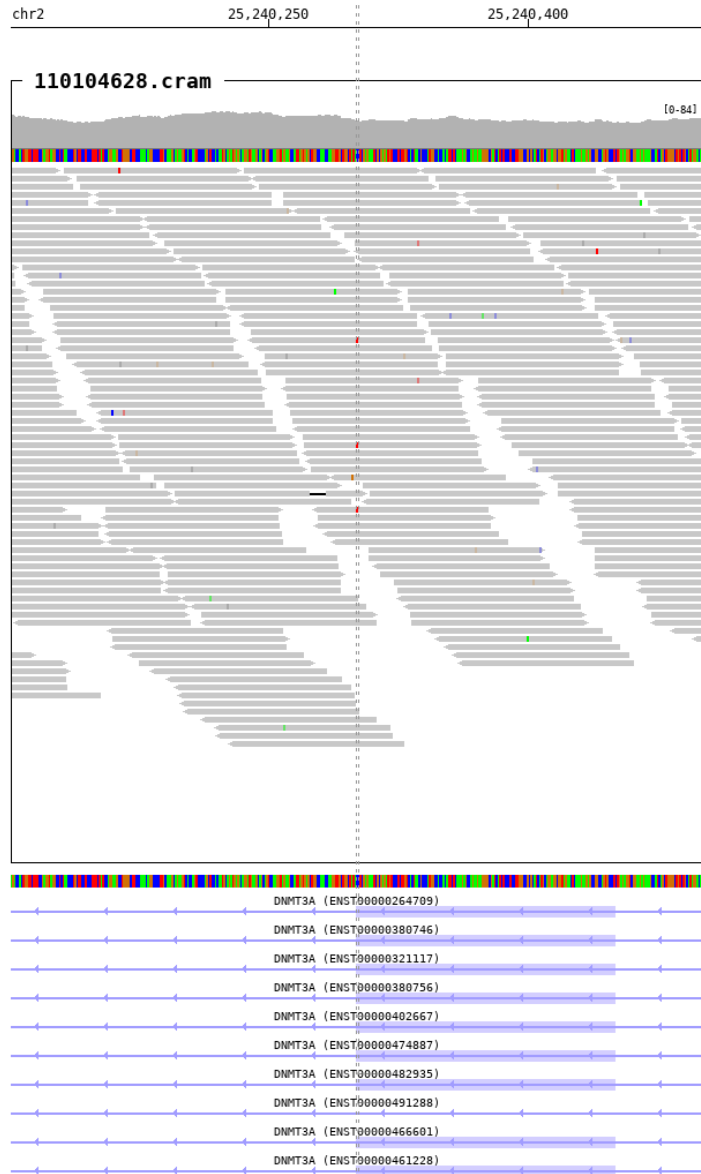

10.36. chr2\_25240303\_T/C

| SampleID | Variants (GRCh38) | Ref_depth | Alt_depth | Gene   | Consequence      |
|----------|-------------------|-----------|-----------|--------|------------------|
| 10013589 | chr2_25240303_T/C | 39        | 14        | DNMT3A | missense_variant |

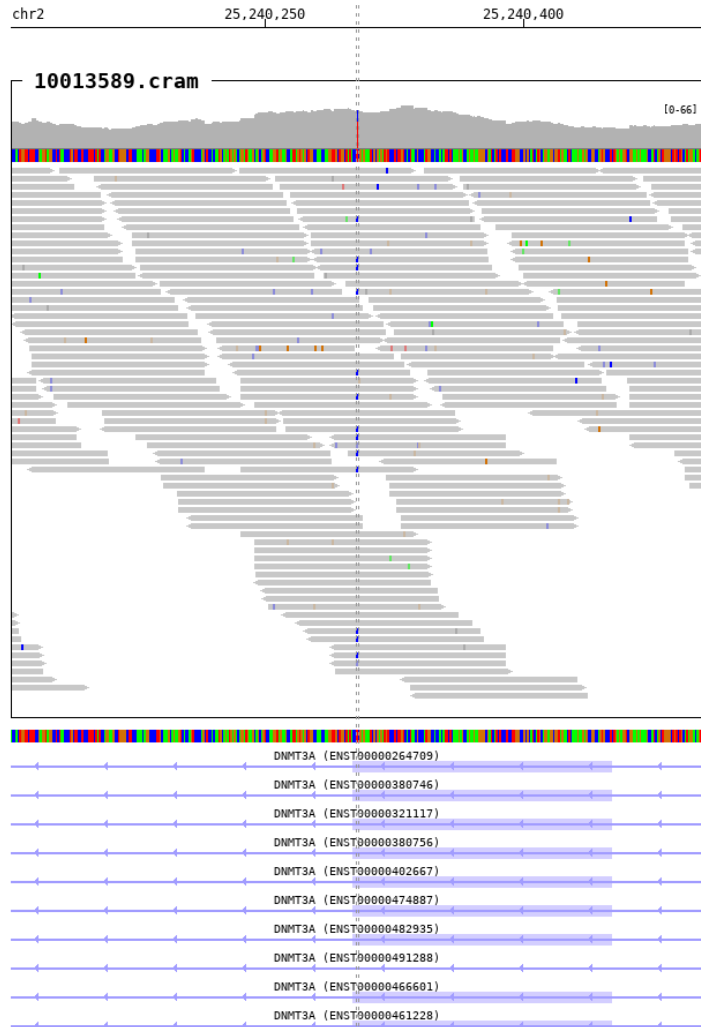

10.37. chr2\_25240304\_C/T

| SampleID  | Variants (GRCh38) | Ref_depth | Alt_depth | Gene   | Consequence      |
|-----------|-------------------|-----------|-----------|--------|------------------|
| 102105932 | chr2_25240304_C/T | 53        | 5         | DNMT3A | missense_variant |

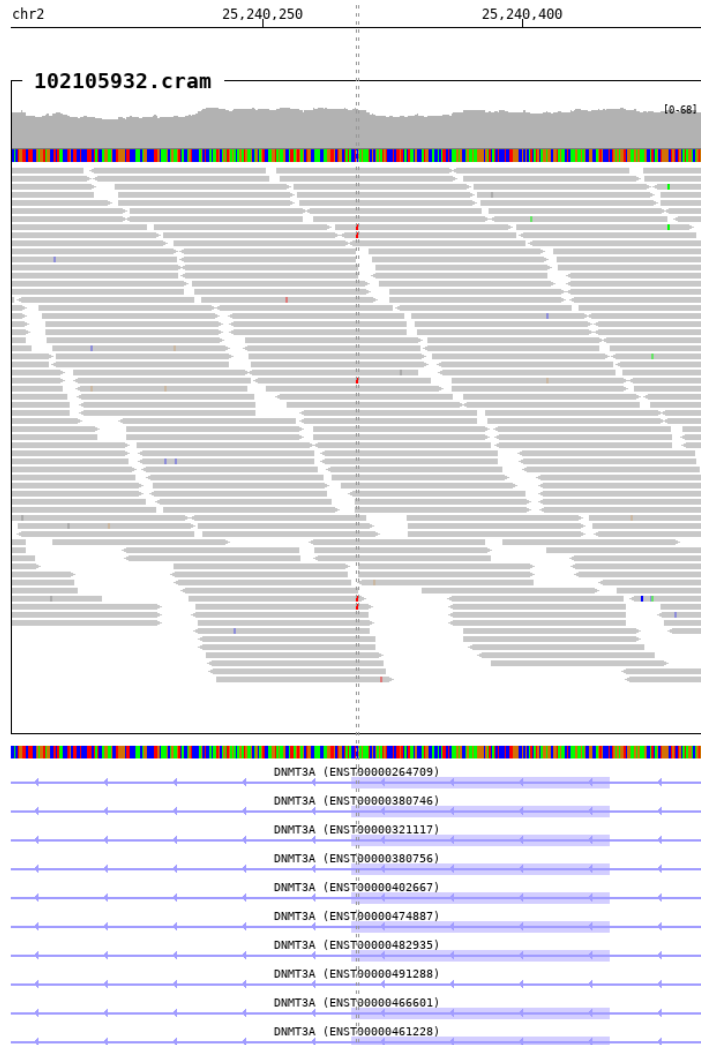

10.38. chr2\_25240307\_A/-

| SampleID  | Variants (GRCh38) | Ref_depth | Alt_depth | Gene   | Consequence        |
|-----------|-------------------|-----------|-----------|--------|--------------------|
| 112301473 | chr2_25240307_A/- | 53        | 7         | DNMT3A | frameshift_variant |

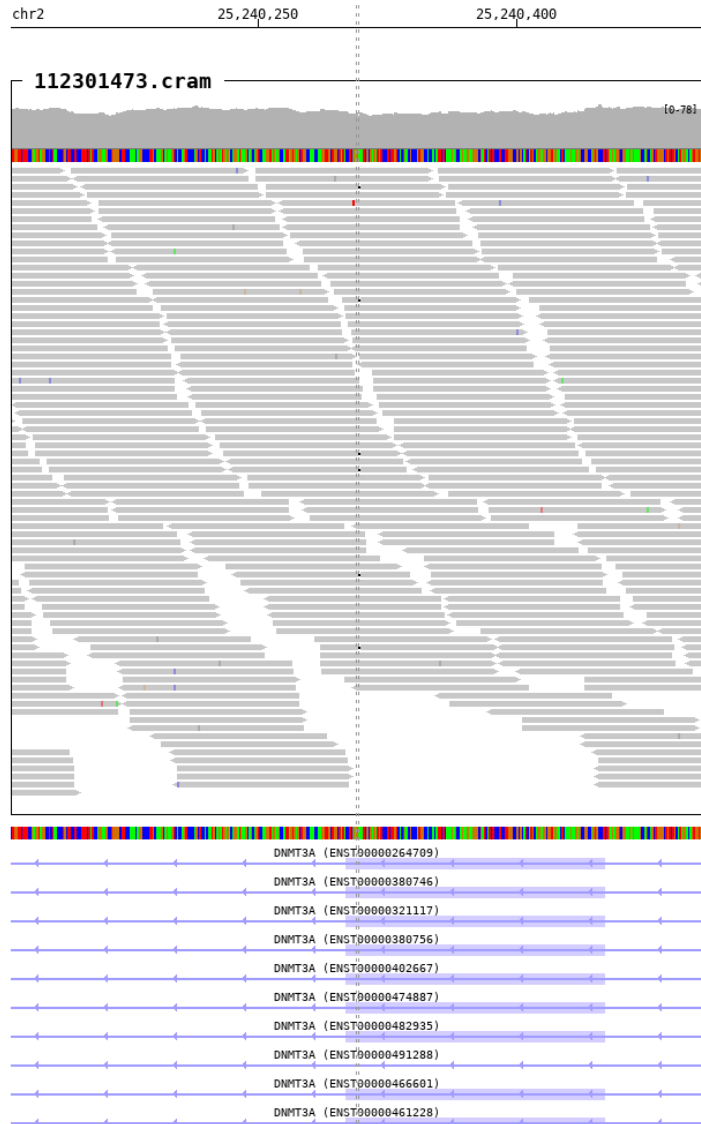

10.39. chr2\_25240312\_C/T

| SampleID  | Variants (GRCh38) | Ref_depth | Alt_depth | Gene          | Consequence      |
|-----------|-------------------|-----------|-----------|---------------|------------------|
| 110103627 | chr2_25240312_C/T | 42        | 6         | <i>DNMT3A</i> | missense_variant |
| 12390108  | chr2_25240312_C/T | 40        | 5         | <i>DNMT3A</i> | missense_variant |

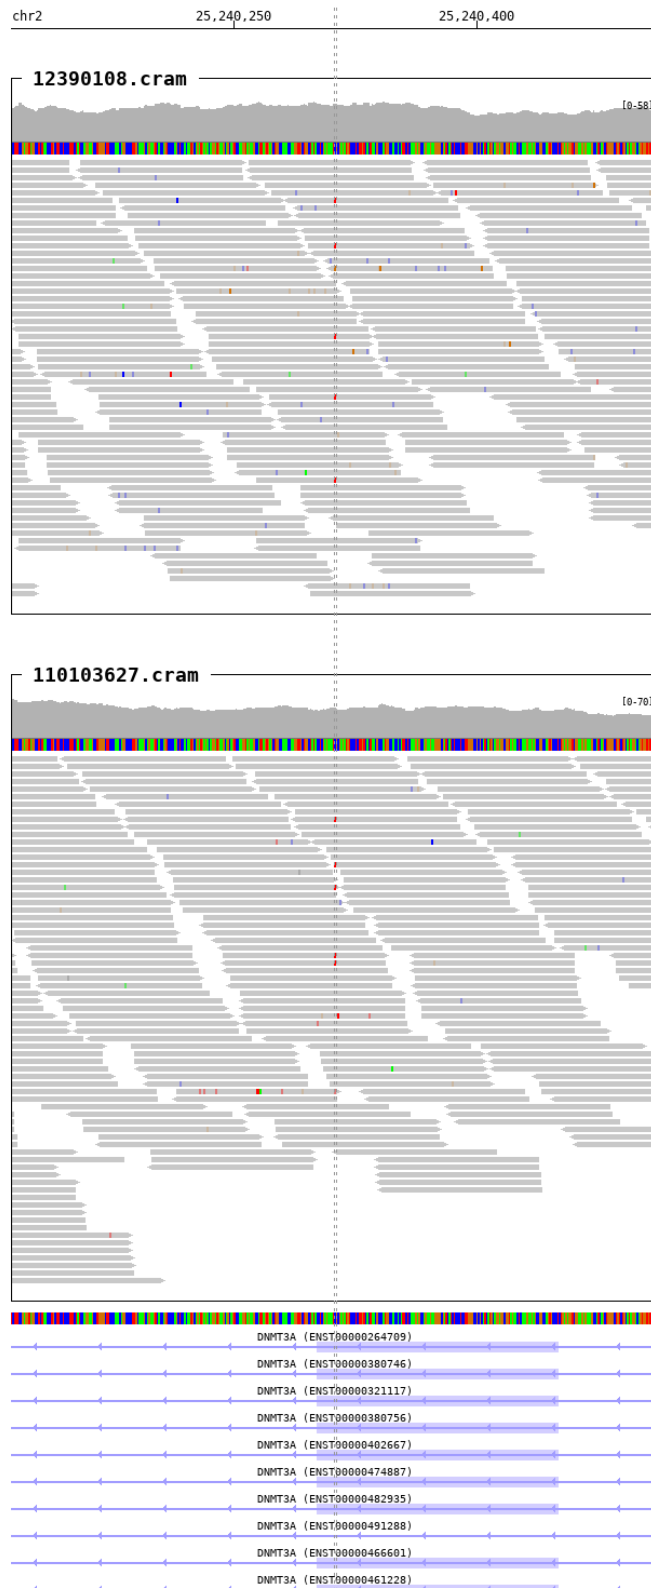

10.40. chr2\_25240313\_G/A

| SampleID  | Variants (GRCh38) | Ref_depth | Alt_depth | Gene          | Consequence |
|-----------|-------------------|-----------|-----------|---------------|-------------|
| 110107380 | chr2_25240313_G/A | 49        | 4         | <i>DNMT3A</i> | stop_gained |
| 110107661 | chr2_25240313_G/A | 39        | 7         | <i>DNMT3A</i> | stop_gained |
| 112404077 | chr2_25240313_G/A | 32        | 8         | <i>DNMT3A</i> | stop_gained |

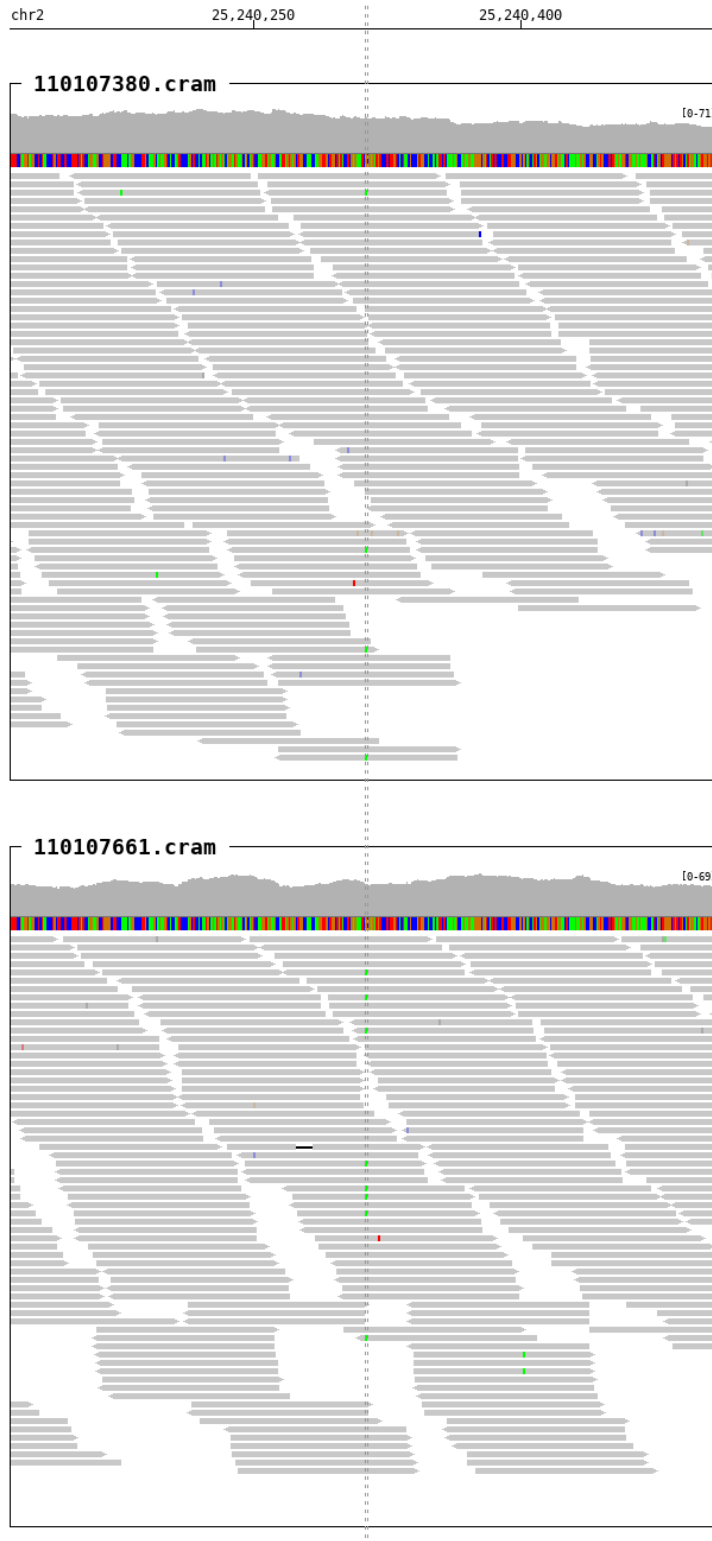

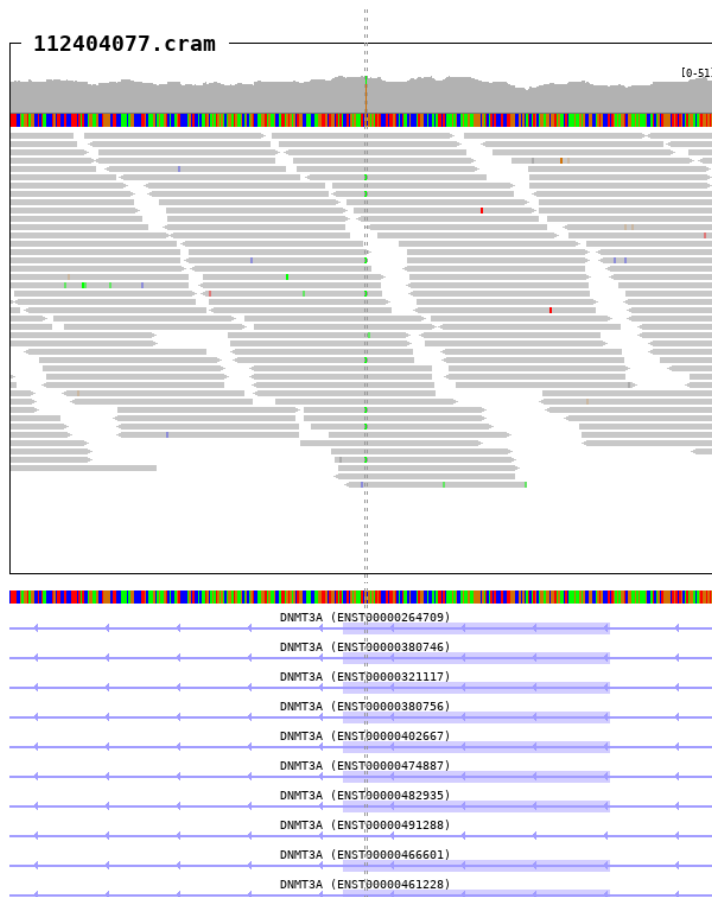

10.41. chr2\_25240315\_G/A

| SampleID   | Variants (GRCh38) | Ref_depth | Alt_depth | Gene          | Consequence      |
|------------|-------------------|-----------|-----------|---------------|------------------|
| 10642009   | chr2_25240315_G/A | 48        | 12        | <i>DNMT3A</i> | missense_variant |
| 12390063   | chr2_25240315_G/A | 36        | 4         | <i>DNMT3A</i> | missense_variant |
| 4307024316 | chr2_25240315_G/A | 45        | 3         | <i>DNMT3A</i> | missense_variant |

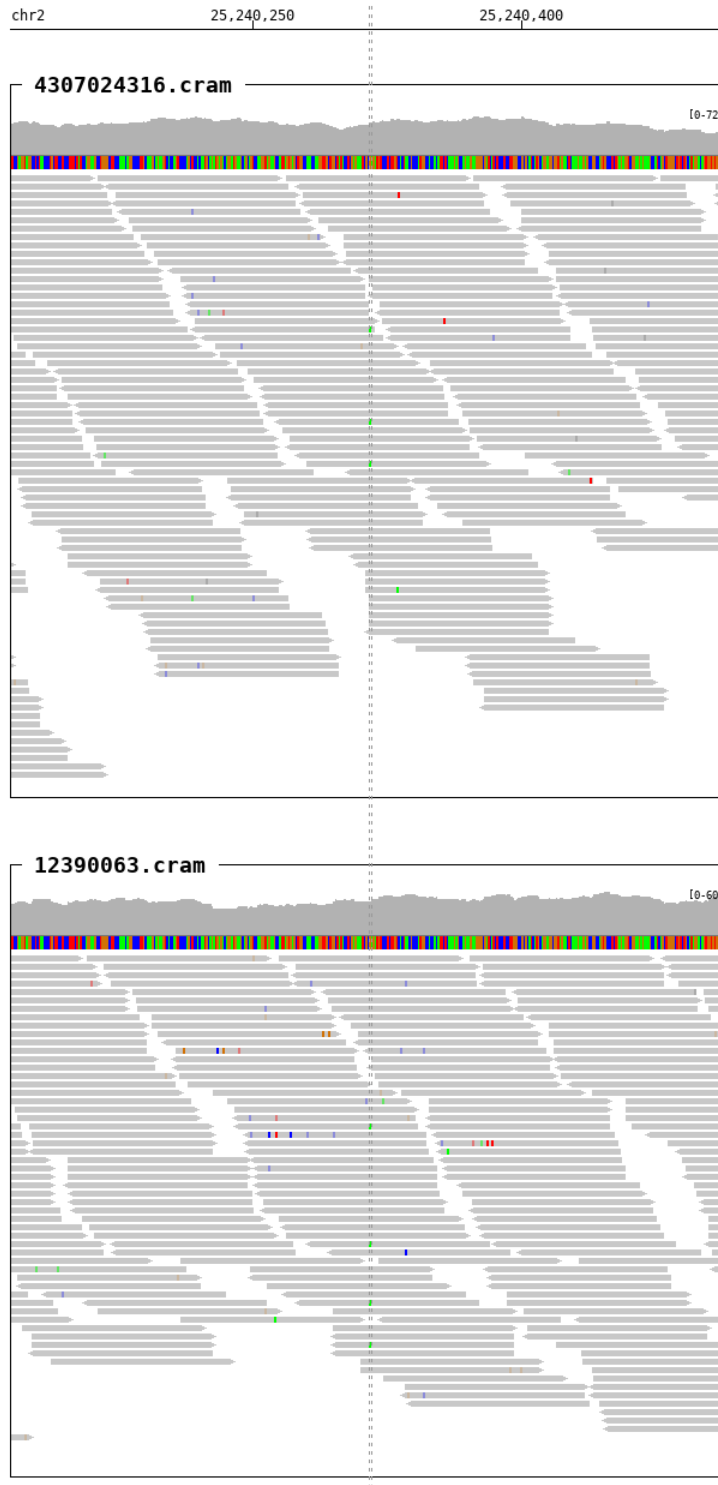

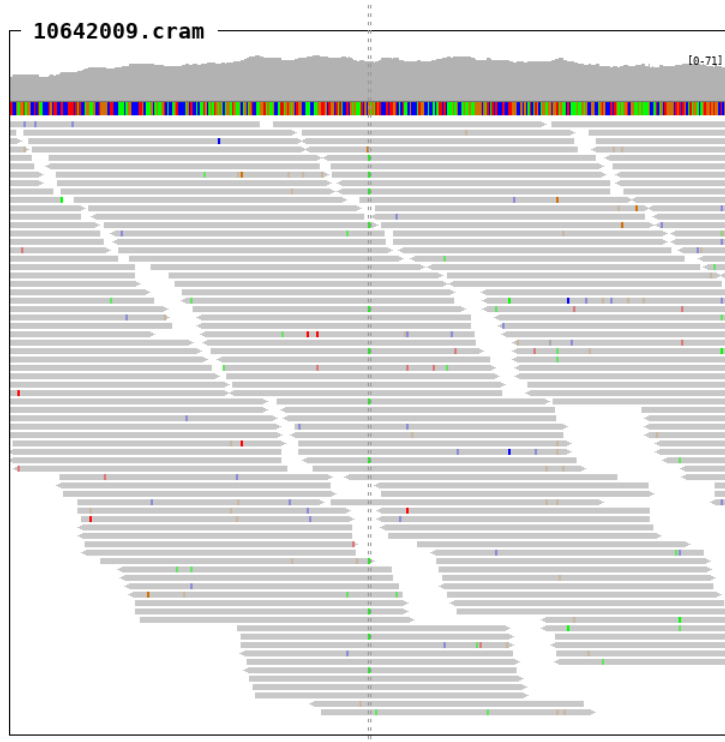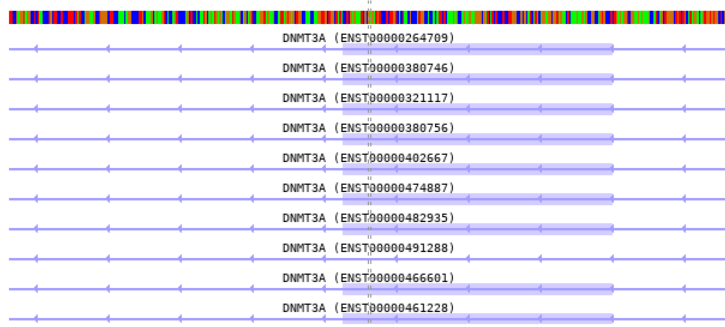

10.42. chr2\_25240315\_G/T

| SampleID  | Variants (GRCh38) | Ref_depth | Alt_depth | Gene          | Consequence |
|-----------|-------------------|-----------|-----------|---------------|-------------|
| 110105836 | chr2_25240315_G/T | 41        | 10        | <i>DNMT3A</i> | stop_gained |

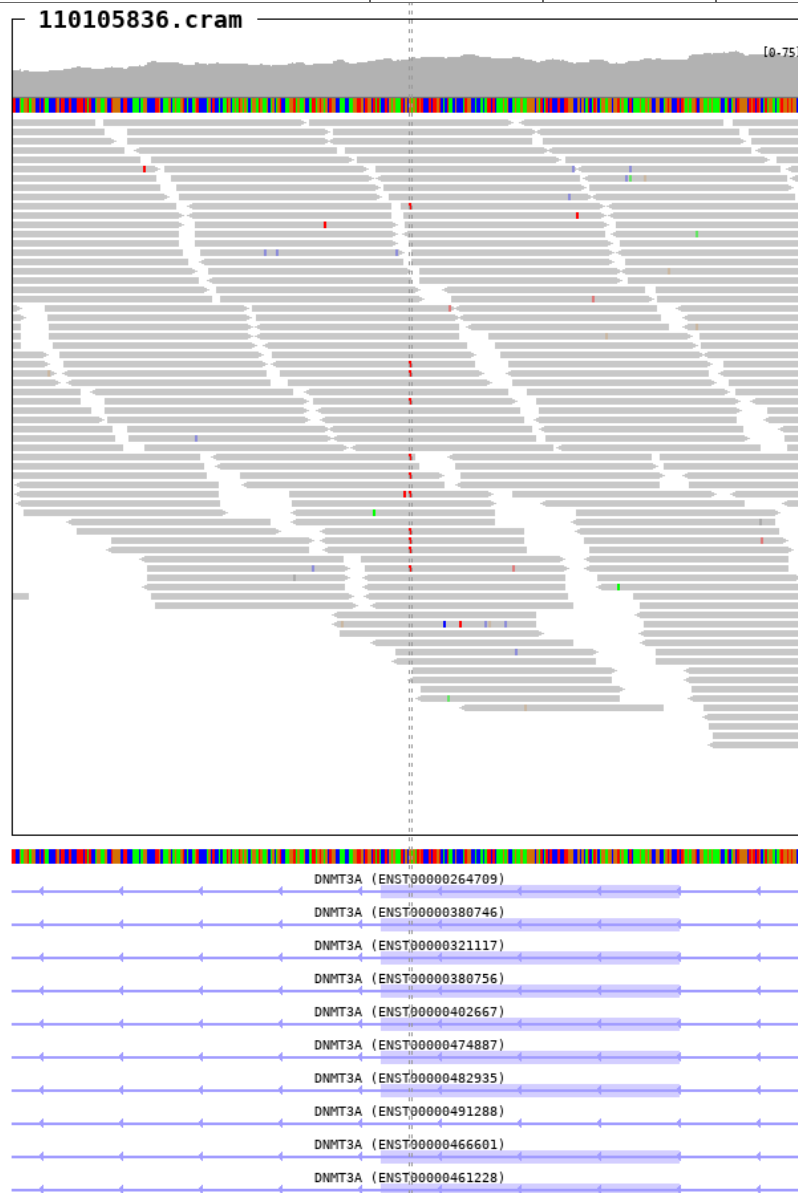

10.43. chr2\_25240318\_-/T

| SampleID  | Variants (GRCh38) | Ref_depth | Alt_depth | Gene   | Consequence        |
|-----------|-------------------|-----------|-----------|--------|--------------------|
| 102105693 | chr2_25240318_-/T | 42        | 4         | DNMT3A | frameshift_variant |

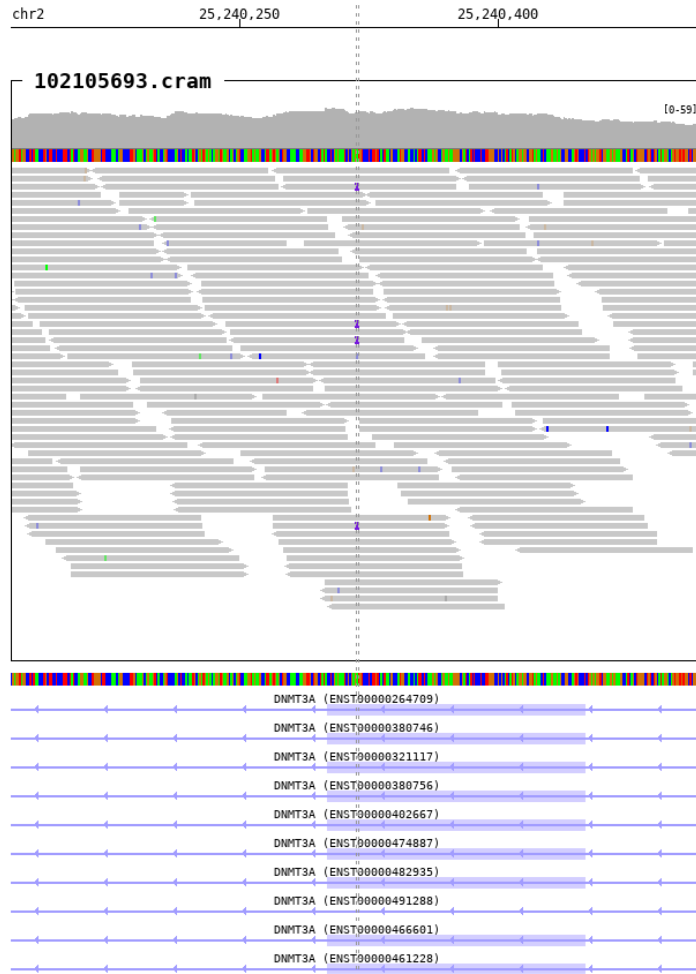

10.44. chr2\_25240320\_TCCC/-

| SampleID | Variants (GRCh38)    | Ref_depth | Alt_depth | Gene          | Consequence        |
|----------|----------------------|-----------|-----------|---------------|--------------------|
| 10312556 | chr2_25240320_TCCC/- | 45        | 4         | <i>DNMT3A</i> | frameshift_variant |

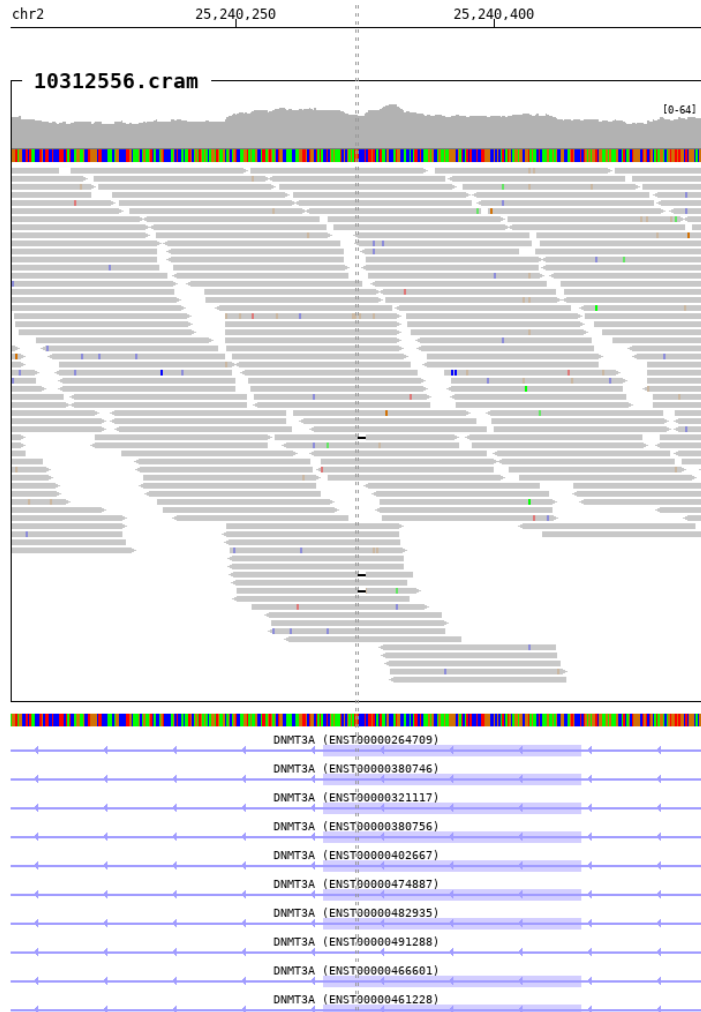

10.45. chr2\_25240326\_TTGT/-

| SampleID | Variants (GRCh38)    | Ref_depth | Alt_depth | Gene   | Consequence        |
|----------|----------------------|-----------|-----------|--------|--------------------|
| 63686    | chr2_25240326_TTGT/- | 70        | 6         | DNMT3A | frameshift_variant |

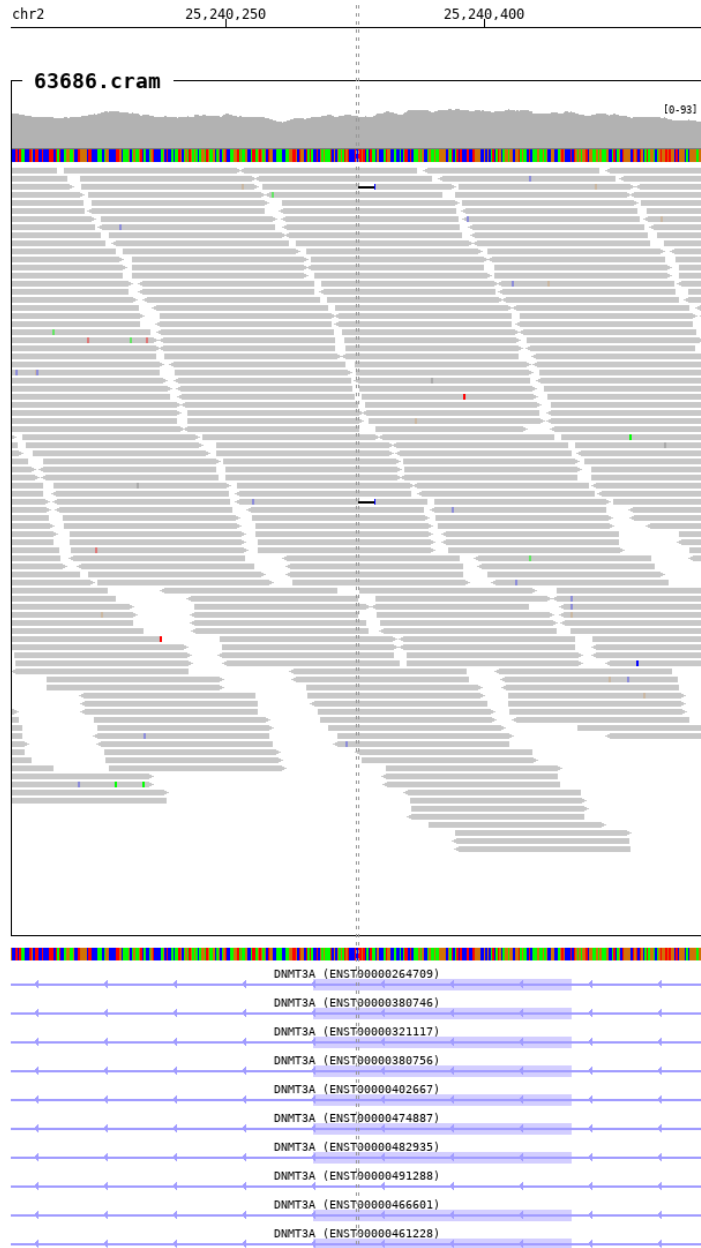

10.46. chr2\_25240331\_ACTAA/-

| SampleID | Variants (GRCh38)     | Ref_depth | Alt_depth | Gene          | Consequence        |
|----------|-----------------------|-----------|-----------|---------------|--------------------|
| 63686    | chr2_25240331_ACTAA/- | 68        | 6         | <i>DNMT3A</i> | frameshift_variant |

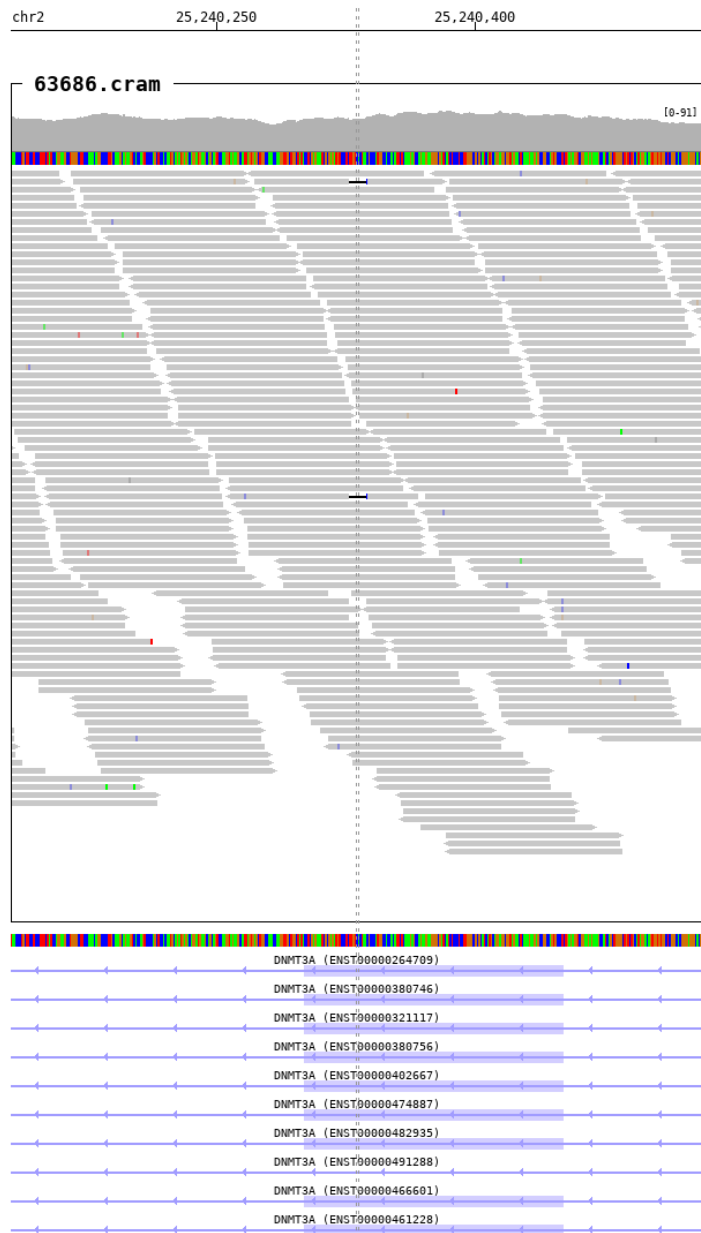

10.47. chr2\_25240338\_C/-

| SampleID  | Variants (GRCh38) | Ref_depth | Alt_depth | Gene   | Consequence        |
|-----------|-------------------|-----------|-----------|--------|--------------------|
| 101103452 | chr2_25240338_C/- | 30        | 5         | DNMT3A | frameshift_variant |

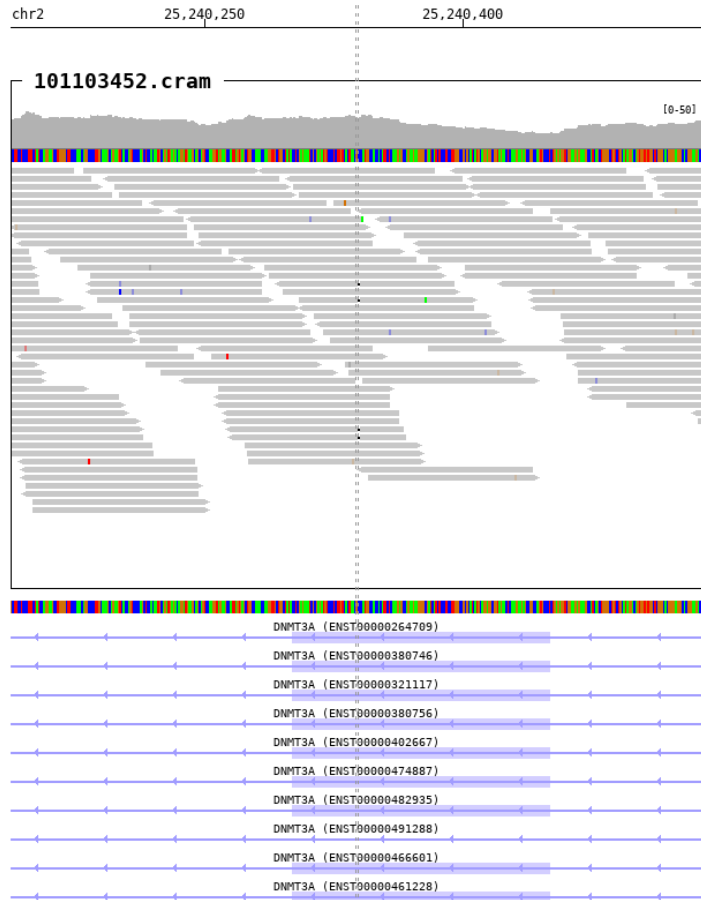

10.48. chr2\_25240360\_A/G

| SampleID  | Variants (GRCh38) | Ref_depth | Alt_depth | Gene          | Consequence      |
|-----------|-------------------|-----------|-----------|---------------|------------------|
| 100600445 | chr2_25240360_A/G | 33        | 5         | <i>DNMT3A</i> | missense_variant |
| 10642029  | chr2_25240360_A/G | 33        | 4         | <i>DNMT3A</i> | missense_variant |
| 60355     | chr2_25240360_A/G | 50        | 4         | <i>DNMT3A</i> | missense_variant |

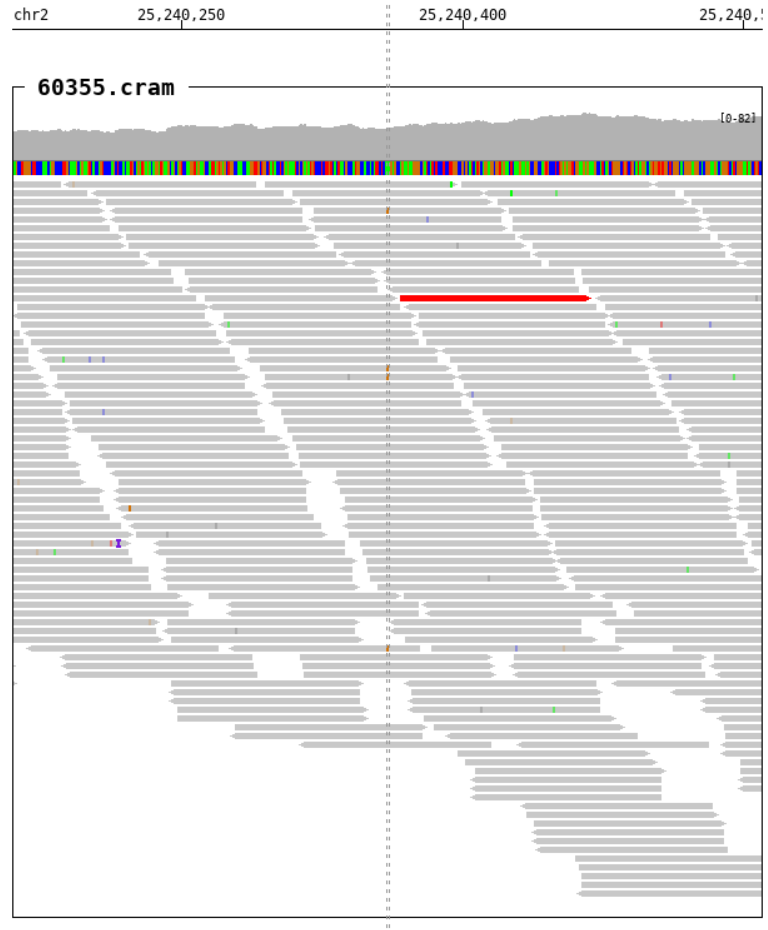

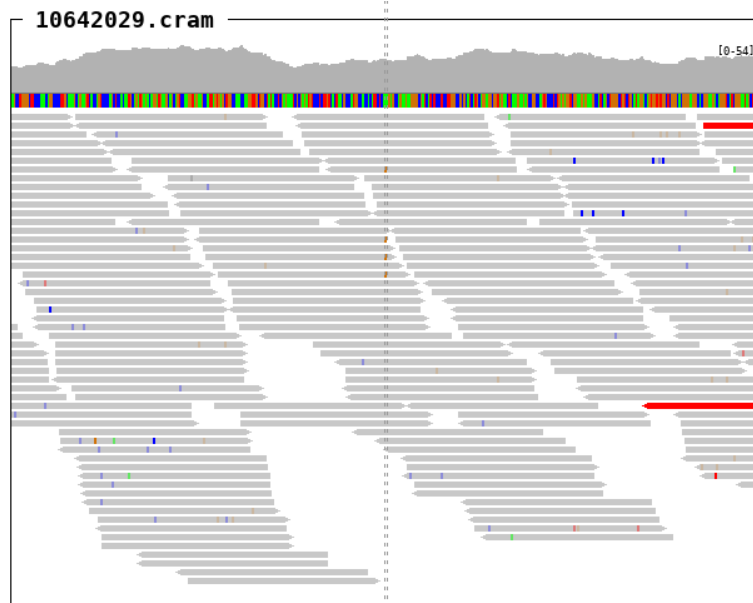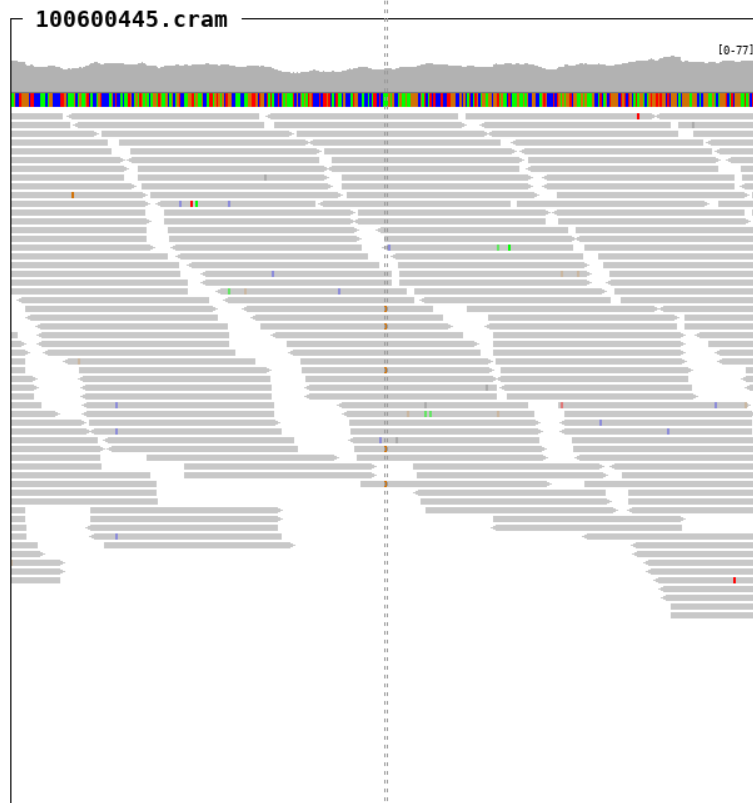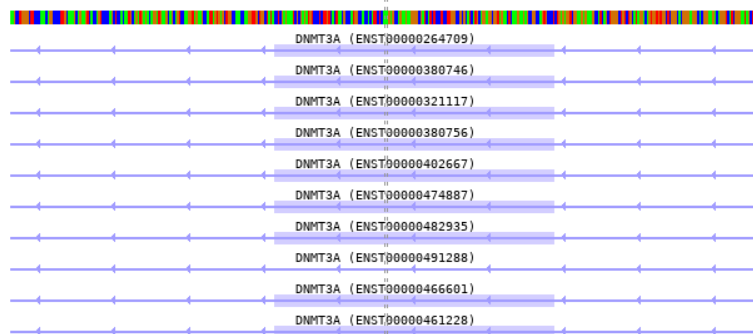

10.49. chr2\_25240367\_A/G

| SampleID  | Variants (GRCh38) | Ref_depth | Alt_depth | Gene   | Consequence      |
|-----------|-------------------|-----------|-----------|--------|------------------|
| 112402716 | chr2_25240367_A/G | 44        | 5         | DNMT3A | missense_variant |

chr2 25,240,250 25,240,400 25,240,550

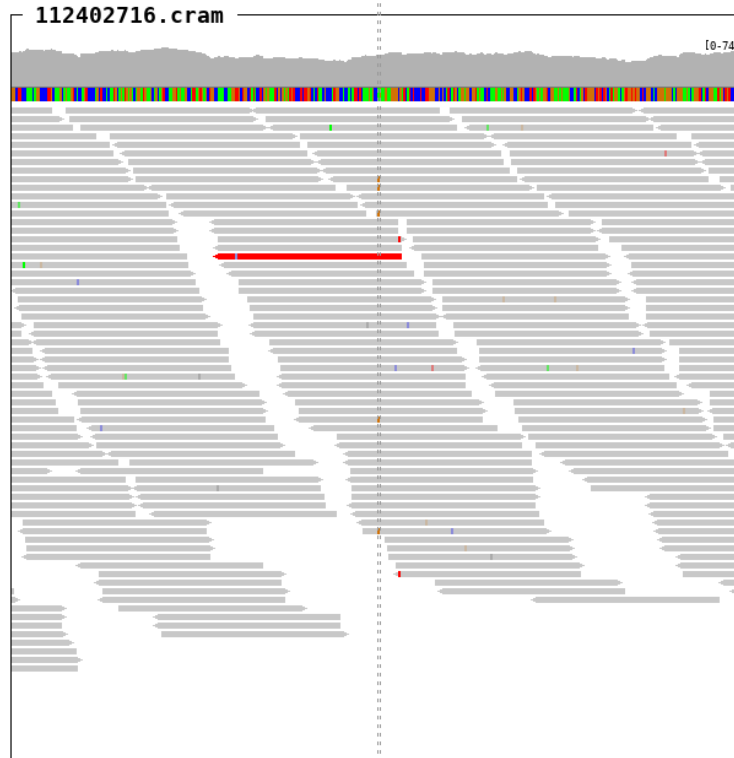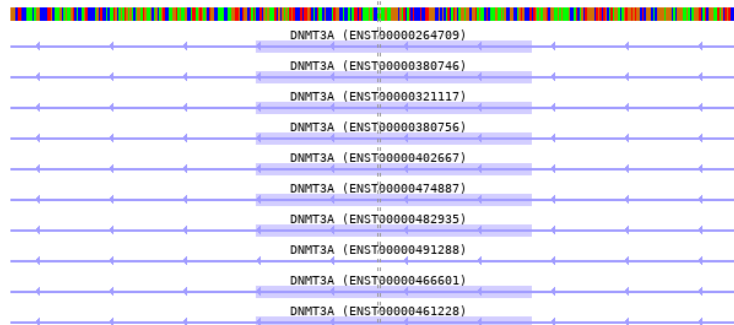

10.50. chr2\_25240368\_G/T

| SampleID  | Variants (GRCh38) | Ref_depth | Alt_depth | Gene   | Consequence      |
|-----------|-------------------|-----------|-----------|--------|------------------|
| 100608898 | chr2_25240368_G/T | 35        | 9         | DNMT3A | missense_variant |

chr2 25,240,250 25,240,400 25,240,55

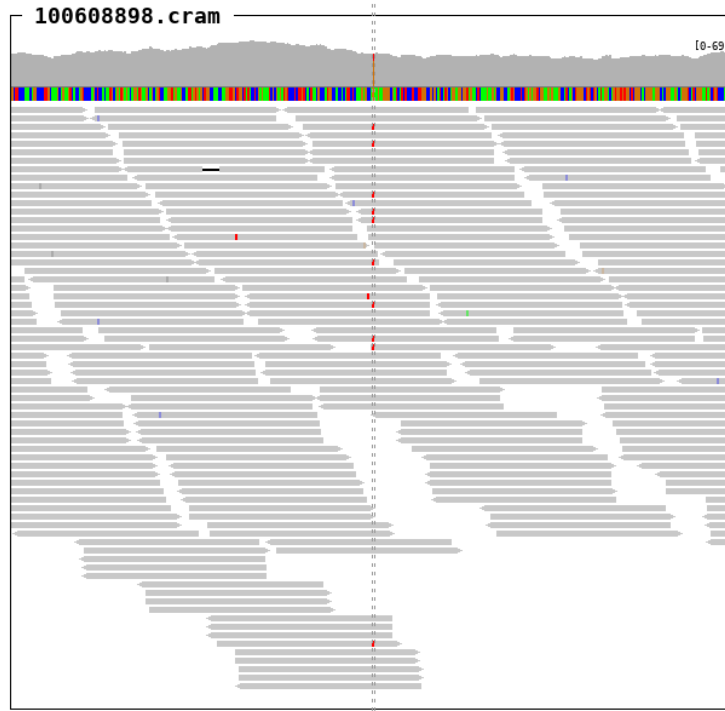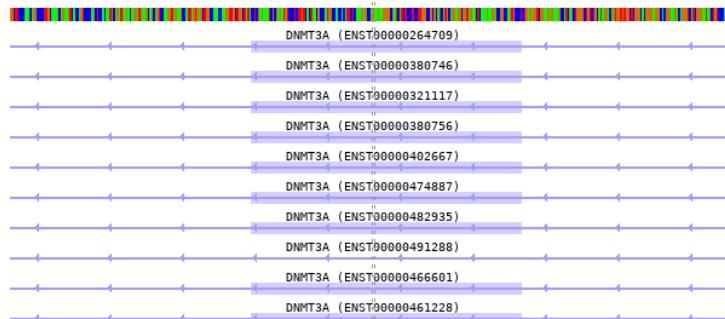

10.51. chr2\_25240379\_G/A

| SampleID  | Variants (GRCh38) | Ref_depth | Alt_depth | Gene          | Consequence      |
|-----------|-------------------|-----------|-----------|---------------|------------------|
| 102101222 | chr2_25240379_G/A | 39        | 7         | <i>DNMT3A</i> | missense_variant |
| 10312586  | chr2_25240379_G/A | 41        | 5         | <i>DNMT3A</i> | missense_variant |
| 10642250  | chr2_25240379_G/A | 33        | 3         | <i>DNMT3A</i> | missense_variant |

chr2 25,240,250 25,240,400 25,240,550

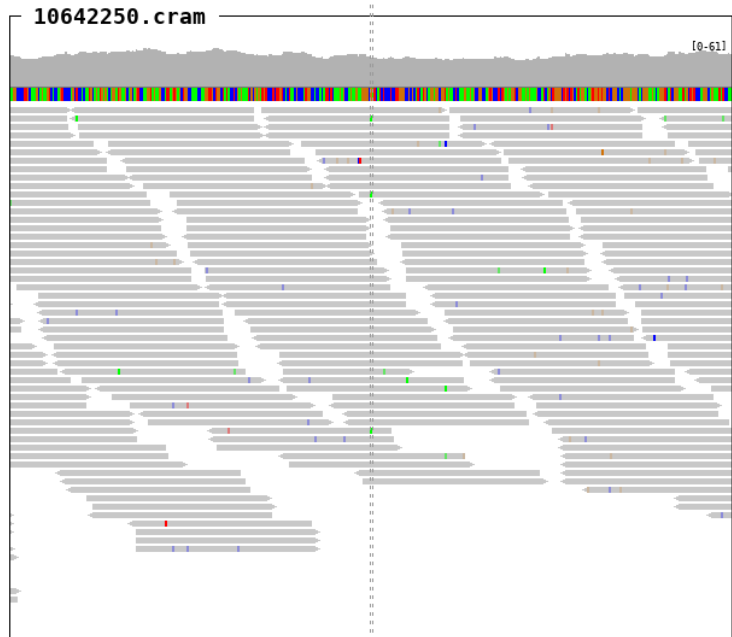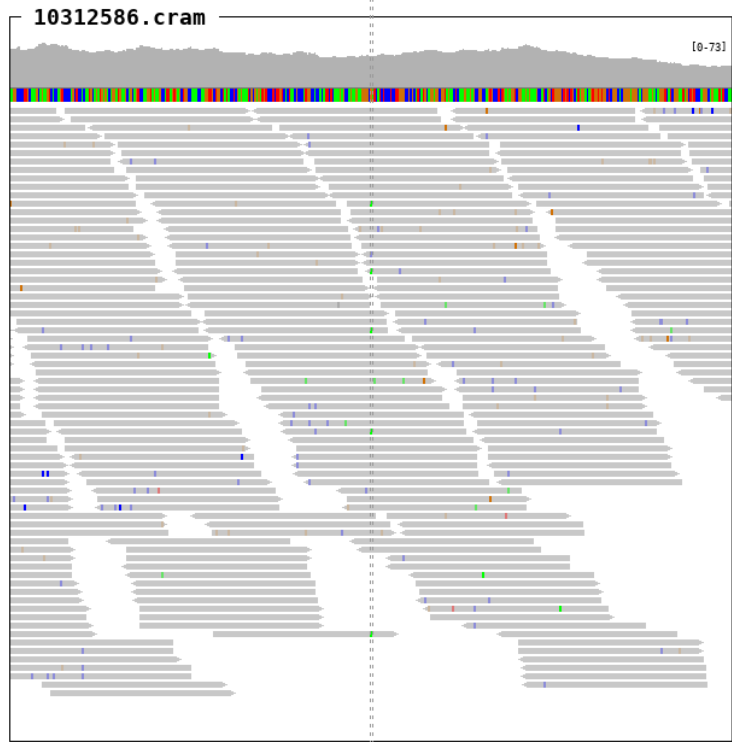

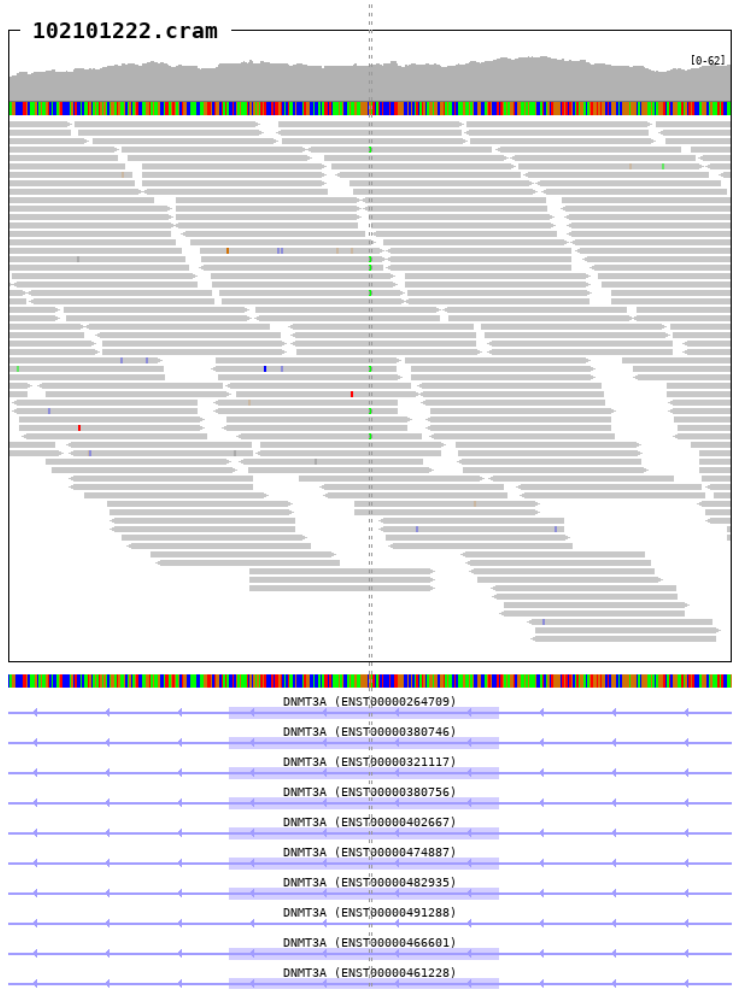

10.52. chr2\_25240388\_C/A

| SampleID   | Variants (GRCh38) | Ref_depth | Alt_depth | Gene   | Consequence |
|------------|-------------------|-----------|-----------|--------|-------------|
| 4331231333 | chr2_25240388_C/A | 36        | 3         | DNMT3A | stop_gained |

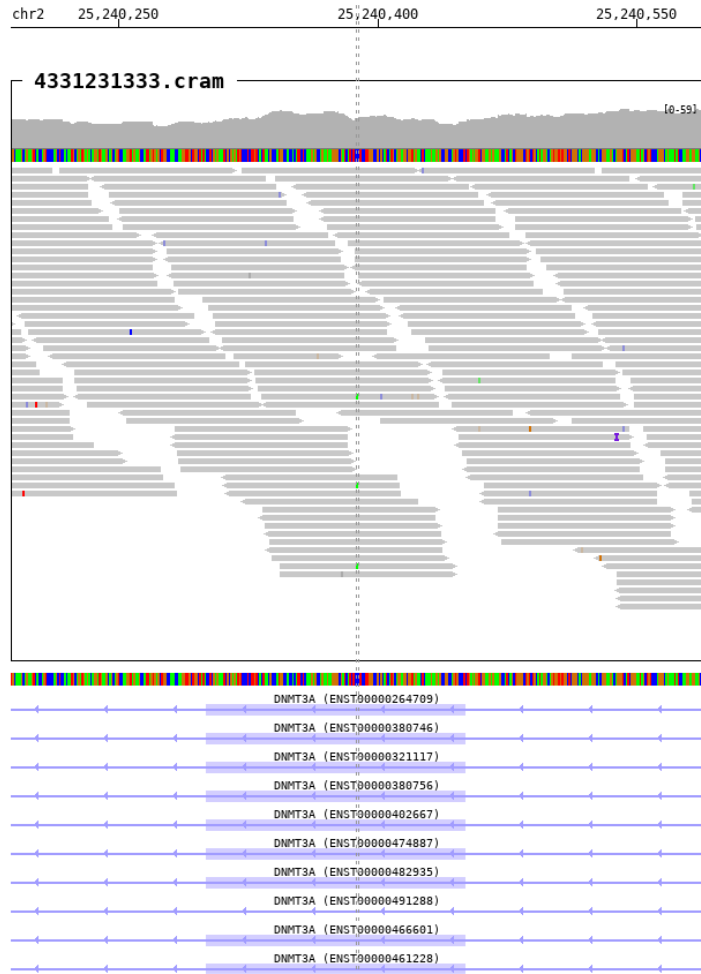

10.53. chr2\_25240392\_T/-

| SampleID | Variants (GRCh38) | Ref_depth | Alt_depth | Gene   | Consequence        |
|----------|-------------------|-----------|-----------|--------|--------------------|
| 10511976 | chr2_25240392_T/- | 32        | 11        | DNMT3A | frameshift_variant |

chr2 25,240,250 25,240,400 25,240,550

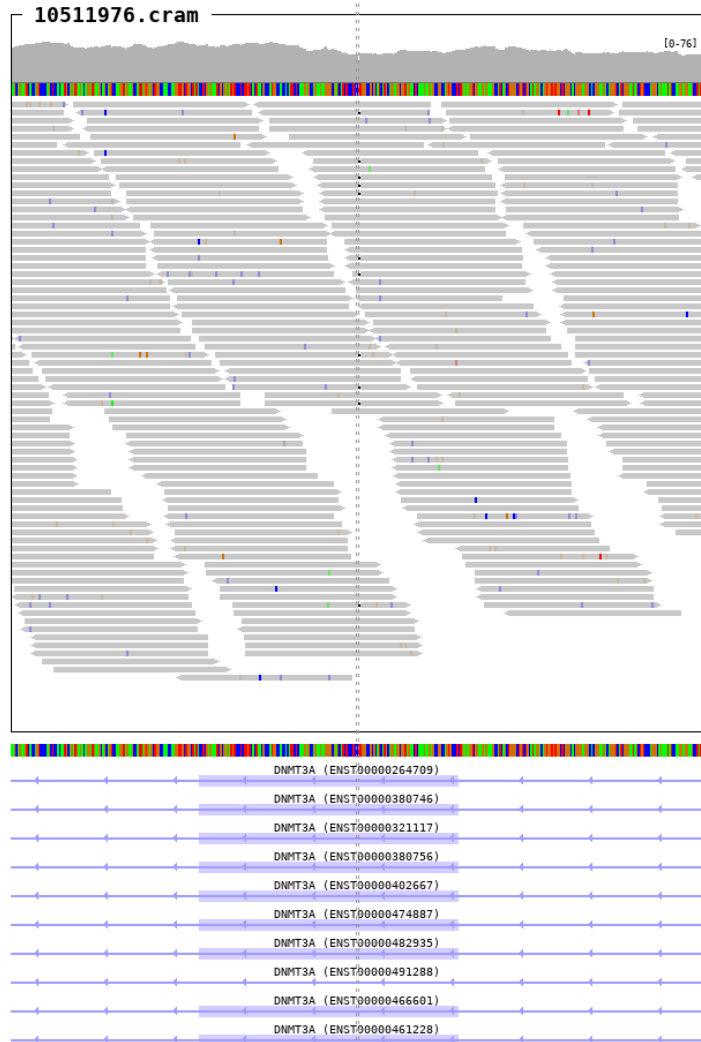

10.54. chr2\_25240417\_C/T

| SampleID  | Variants (GRCh38) | Ref_depth | Alt_depth | Gene          | Consequence      |
|-----------|-------------------|-----------|-----------|---------------|------------------|
| 101602363 | chr2_25240417_C/T | 41        | 5         | <i>DNMT3A</i> | missense_variant |
| 101604133 | chr2_25240417_C/T | 41        | 3         | <i>DNMT3A</i> | missense_variant |
| 10511950  | chr2_25240417_C/T | 47        | 9         | <i>DNMT3A</i> | missense_variant |
| 110100186 | chr2_25240417_C/T | 49        | 8         | <i>DNMT3A</i> | missense_variant |
| 112301846 | chr2_25240417_C/T | 24        | 3         | <i>DNMT3A</i> | missense_variant |

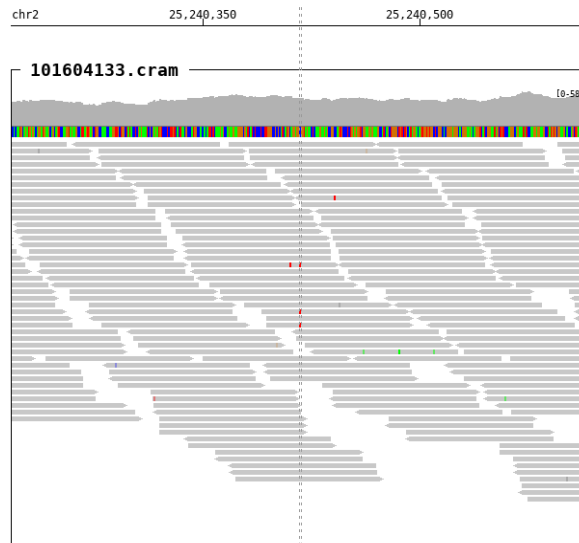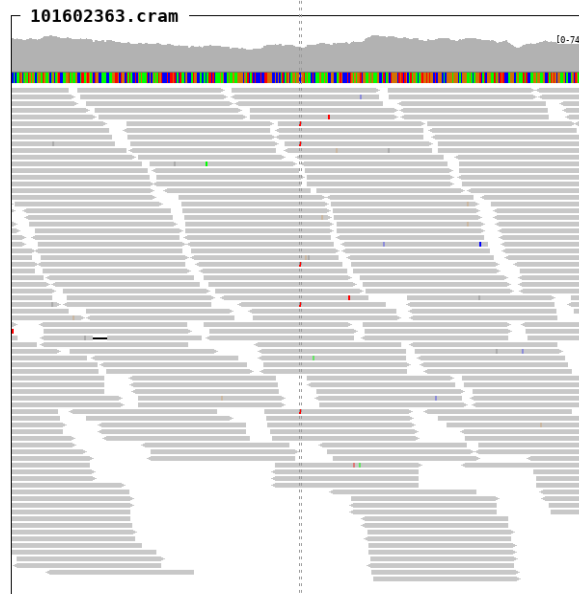

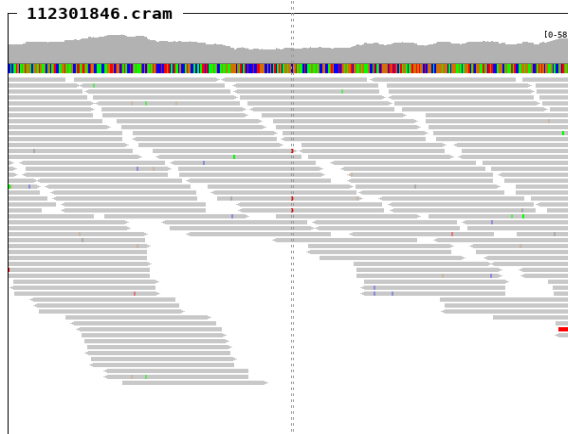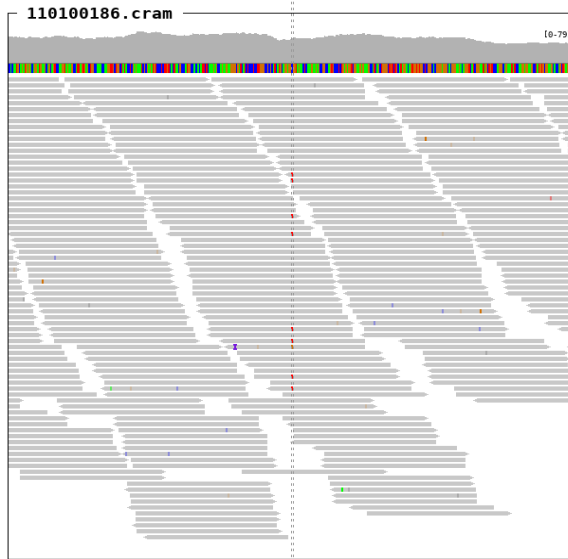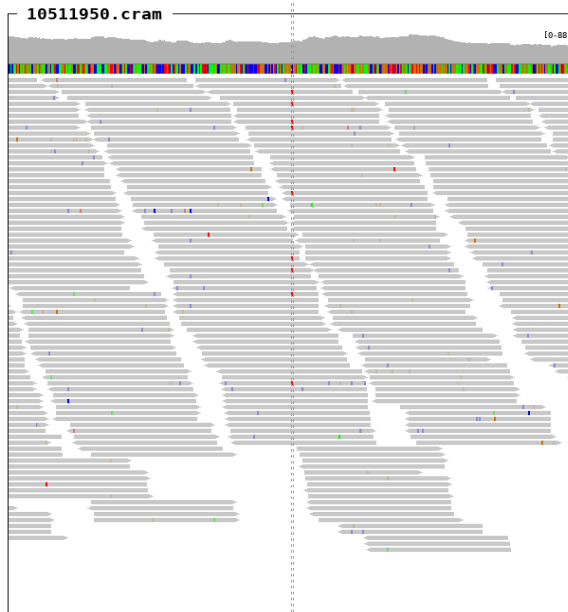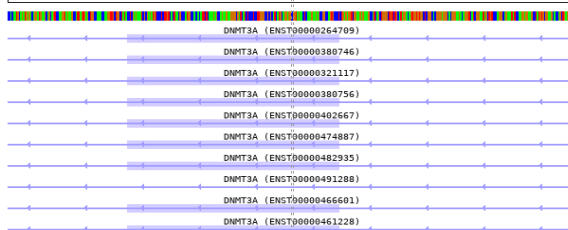

10.55. chr2\_25240418\_G/A

| SampleID  | Variants (GRCh38) | Ref_depth | Alt_depth | Gene          | Consequence      |
|-----------|-------------------|-----------|-----------|---------------|------------------|
| 100601488 | chr2_25240418_G/A | 35        | 5         | <i>DNMT3A</i> | missense_variant |
| 100602584 | chr2_25240418_G/A | 34        | 3         | <i>DNMT3A</i> | missense_variant |
| 101608015 | chr2_25240418_G/A | 33        | 3         | <i>DNMT3A</i> | missense_variant |
| 110100552 | chr2_25240418_G/A | 44        | 3         | <i>DNMT3A</i> | missense_variant |
| 12390213  | chr2_25240418_G/A | 30        | 7         | <i>DNMT3A</i> | missense_variant |

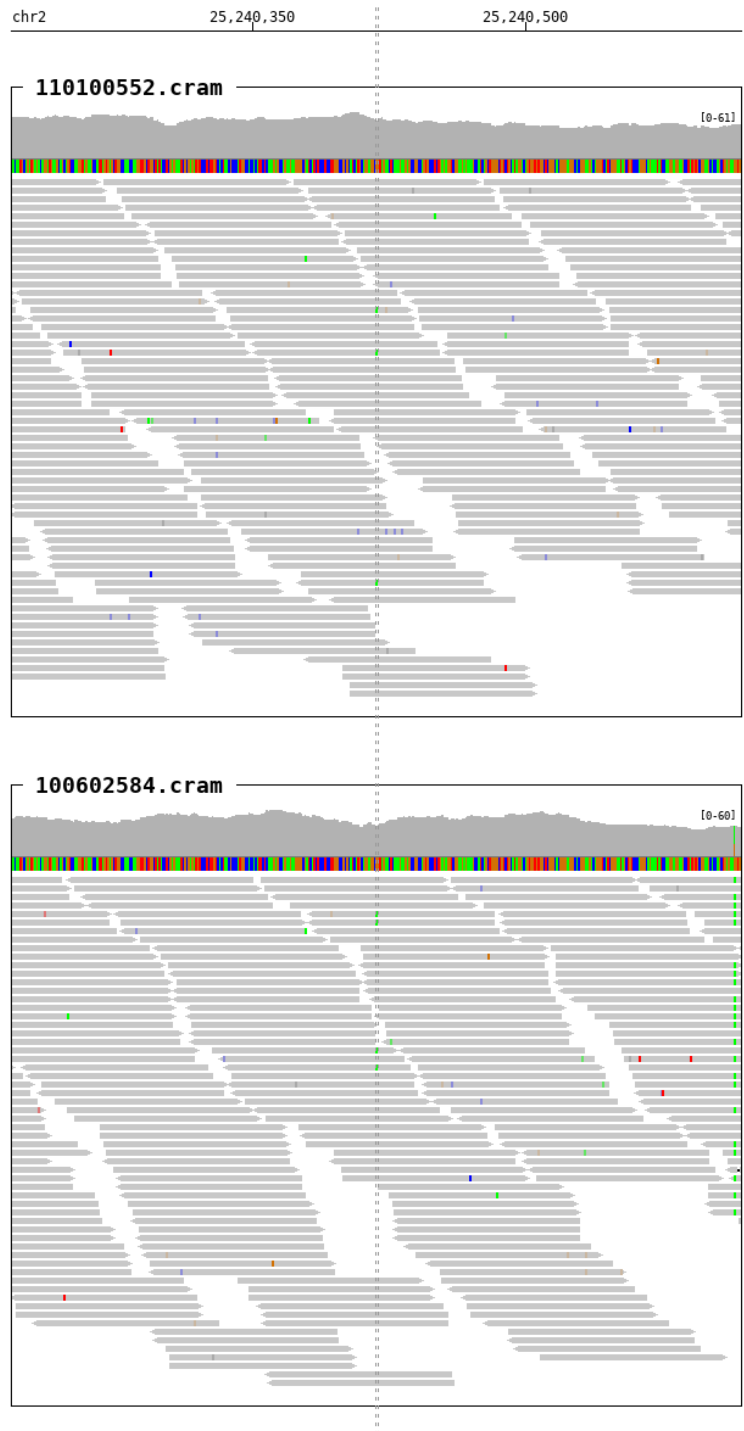

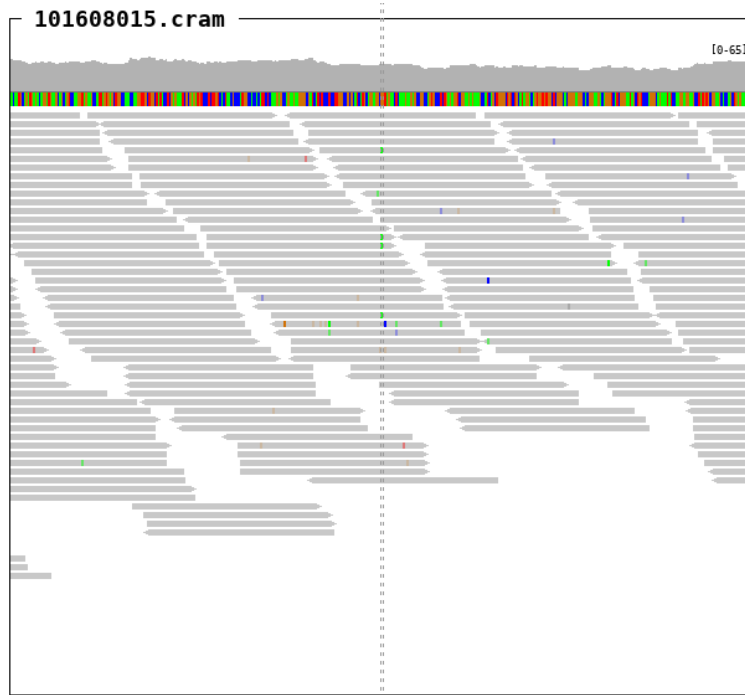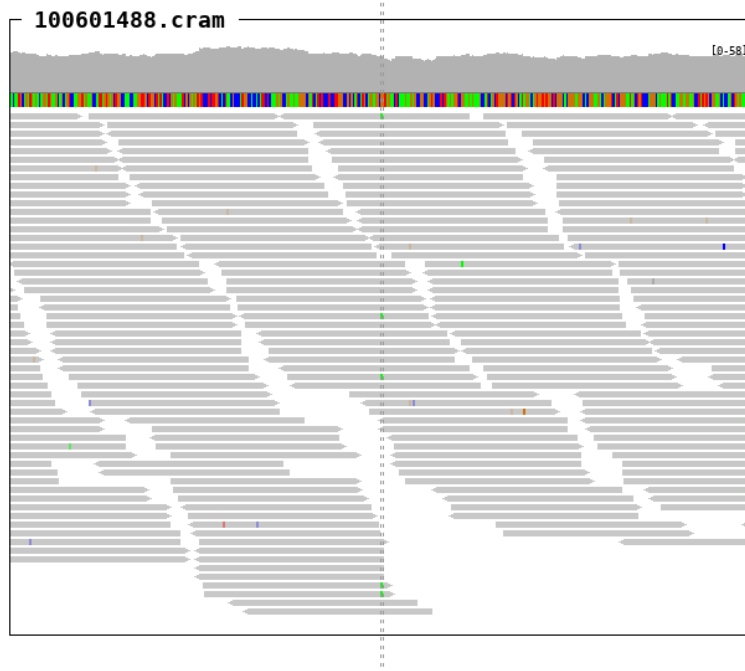

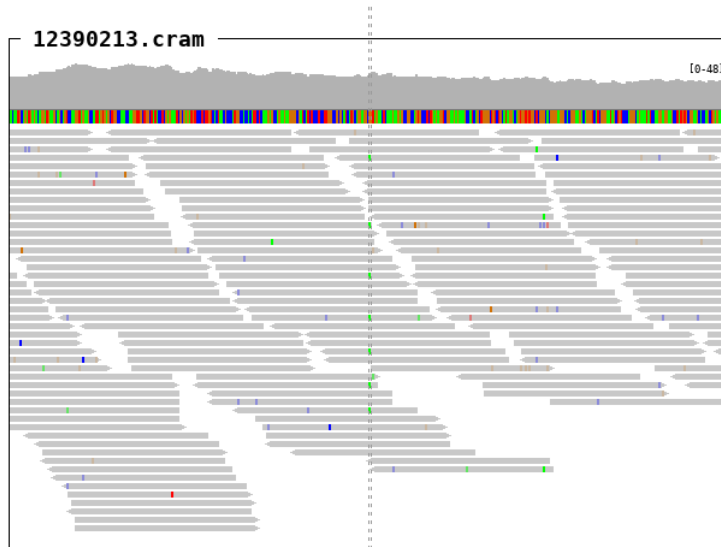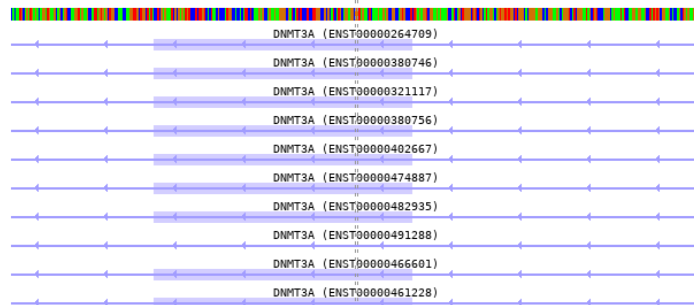

10.56. chr2\_25240420\_T/C

| SampleID  | Variants (GRCh38) | Ref_depth | Alt_depth | Gene          | Consequence      |
|-----------|-------------------|-----------|-----------|---------------|------------------|
| 101601325 | chr2_25240420_T/C | 32        | 5         | <i>DNMT3A</i> | missense_variant |
| 10310293  | chr2_25240420_T/C | 44        | 5         | <i>DNMT3A</i> | missense_variant |

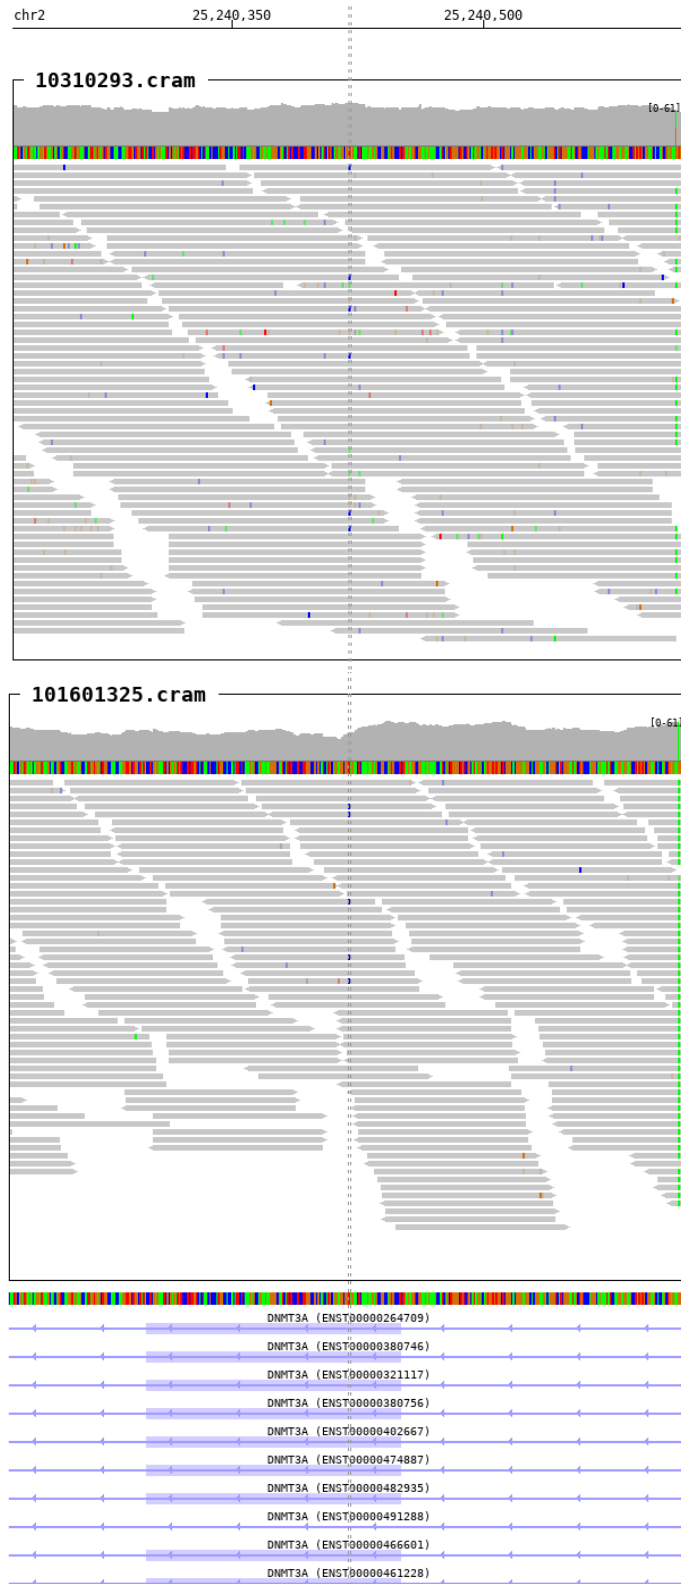

10.57. chr2\_25240420\_T/G

| SampleID | Variants (GRCh38) | Ref_depth | Alt_depth | Gene   | Consequence      |
|----------|-------------------|-----------|-----------|--------|------------------|
| 12110214 | chr2_25240420_T/G | 33        | 5         | DNMT3A | missense_variant |

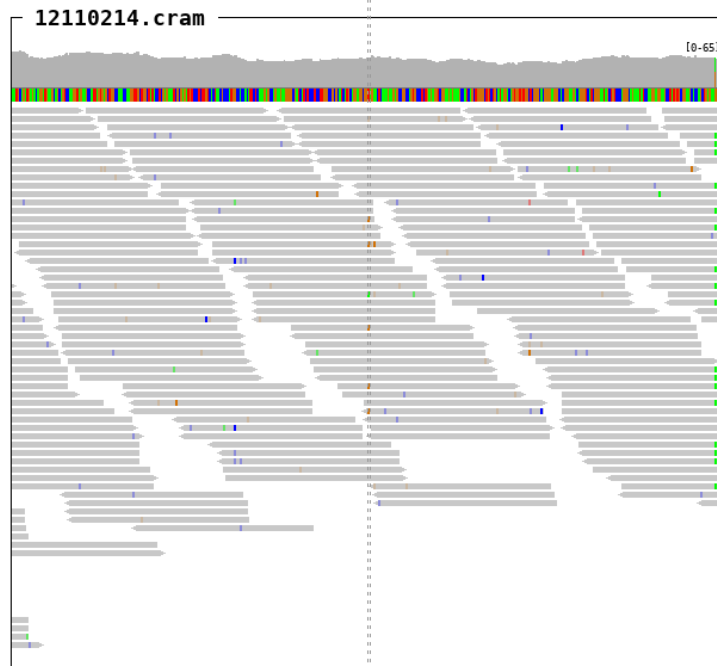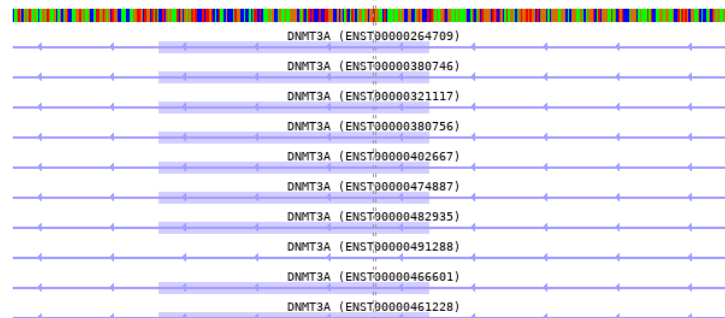

10.58. chr2\_25240423\_A/C

| SampleID | Variants (GRCh38) | Ref_depth | Alt_depth | Gene          | Consequence      |
|----------|-------------------|-----------|-----------|---------------|------------------|
| 60594    | chr2_25240423_A/C | 42        | 4         | <i>DNMT3A</i> | missense_variant |
| 65451    | chr2_25240423_A/C | 111       | 5         | <i>DNMT3A</i> | missense_variant |

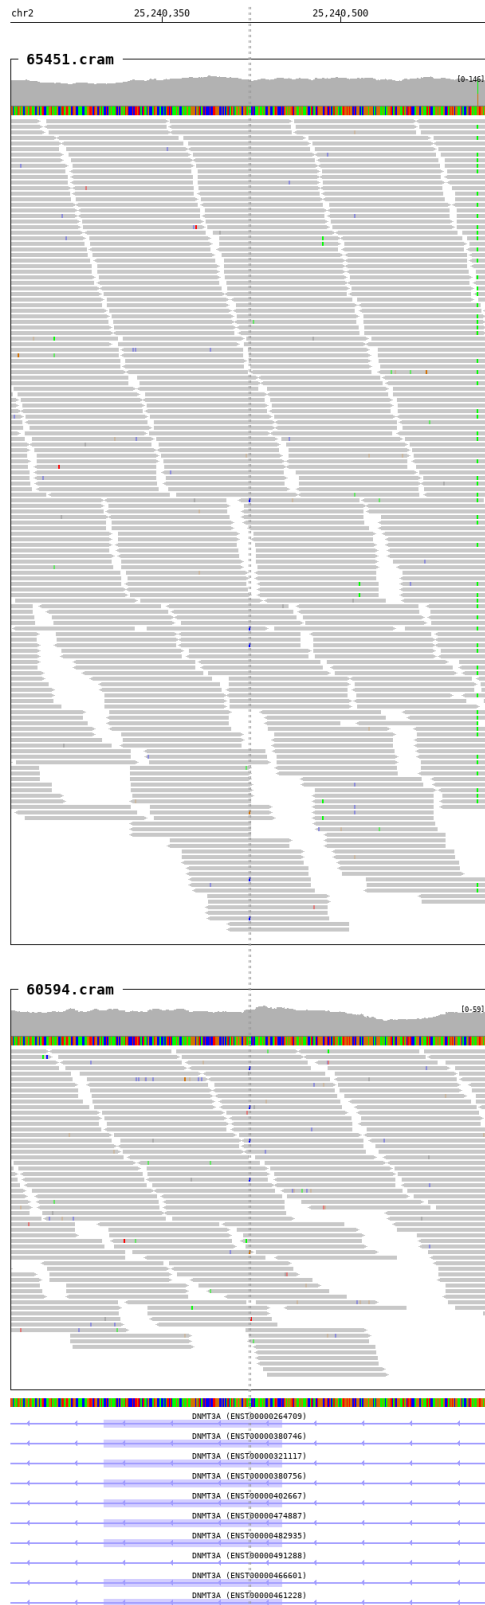

10.59. chr2\_25240427\_AAAGAAGAGCCGGCCAG/-

| SampleID  | Variants (GRCh38)                 | Ref_depth | Alt_depth | Gene   | Consequence        |
|-----------|-----------------------------------|-----------|-----------|--------|--------------------|
| 101607204 | chr2_25240427_AAAGAAGAGCCGGCCAG/- | 27        | 5         | DNMT3A | frameshift_variant |

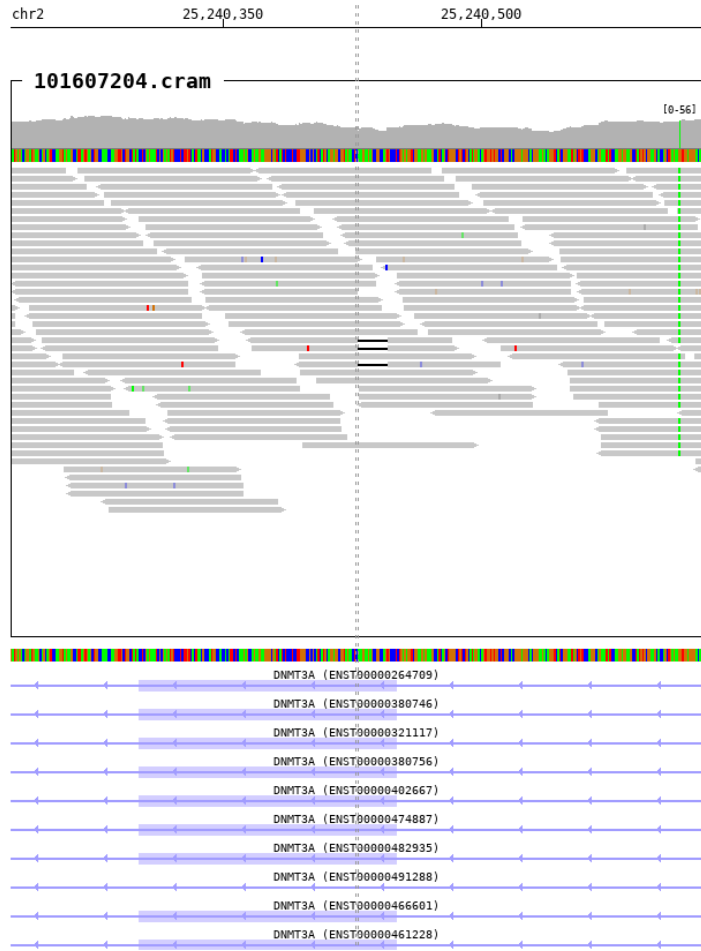

10.60. chr2\_25240428\_AAG/-

| SampleID  | Variants (GRCh38)   | Ref_depth | Alt_depth | Gene          | Consequence      |
|-----------|---------------------|-----------|-----------|---------------|------------------|
| 10012386  | chr2_25240428_AAG/- | 41        | 4         | <i>DNMT3A</i> | inframe_deletion |
| 101105663 | chr2_25240428_AAG/- | 55        | 4         | <i>DNMT3A</i> | inframe_deletion |
| 112304011 | chr2_25240428_AAG/- | 37        | 3         | <i>DNMT3A</i> | inframe_deletion |
| 112402480 | chr2_25240428_AAG/- | 45        | 5         | <i>DNMT3A</i> | inframe_deletion |

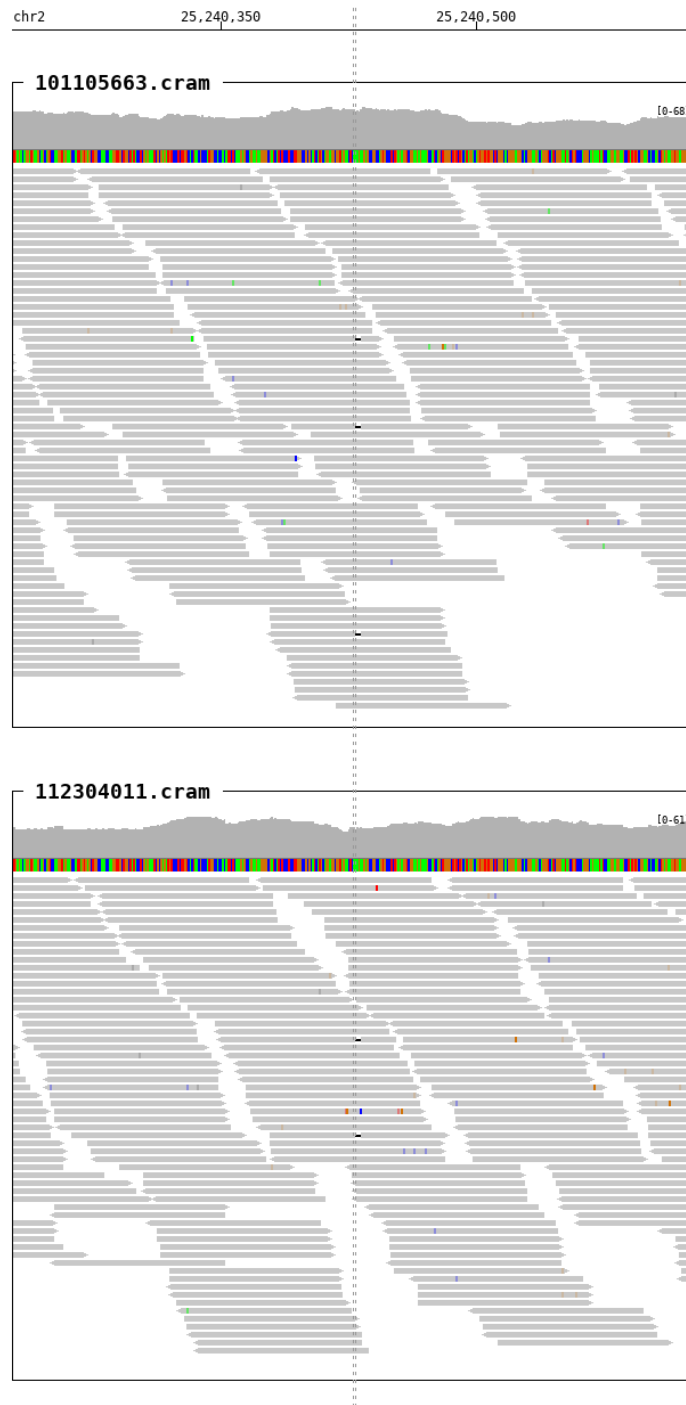

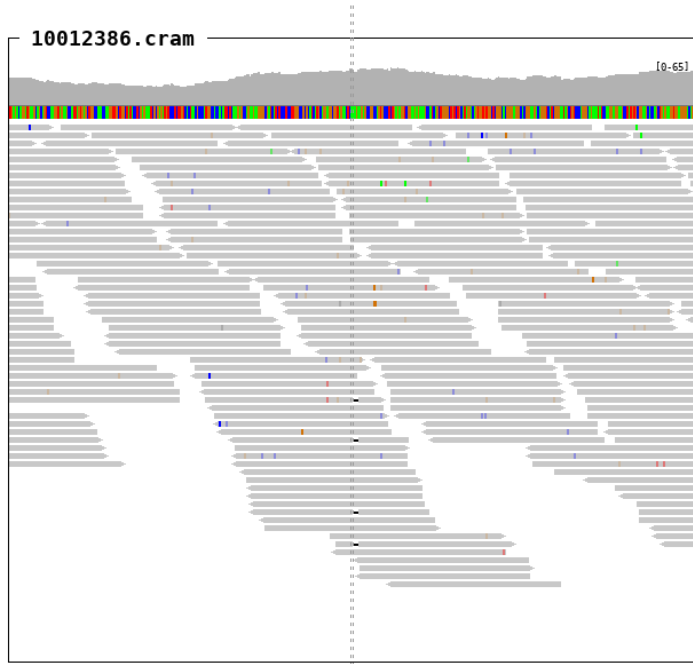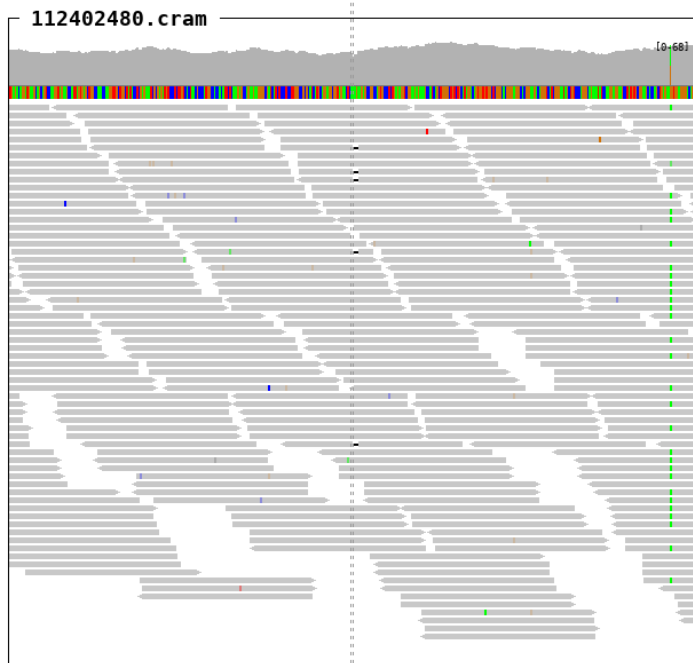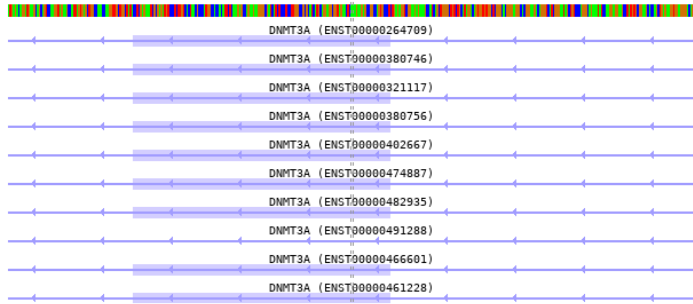

10.61. chr2\_25240429\_A/G

| SampleID   | Variants (GRCh38) | Ref_depth | Alt_depth | Gene   | Consequence      |
|------------|-------------------|-----------|-----------|--------|------------------|
| 3707854247 | chr2_25240429_A/G | 34        | 7         | DNMT3A | missense_variant |

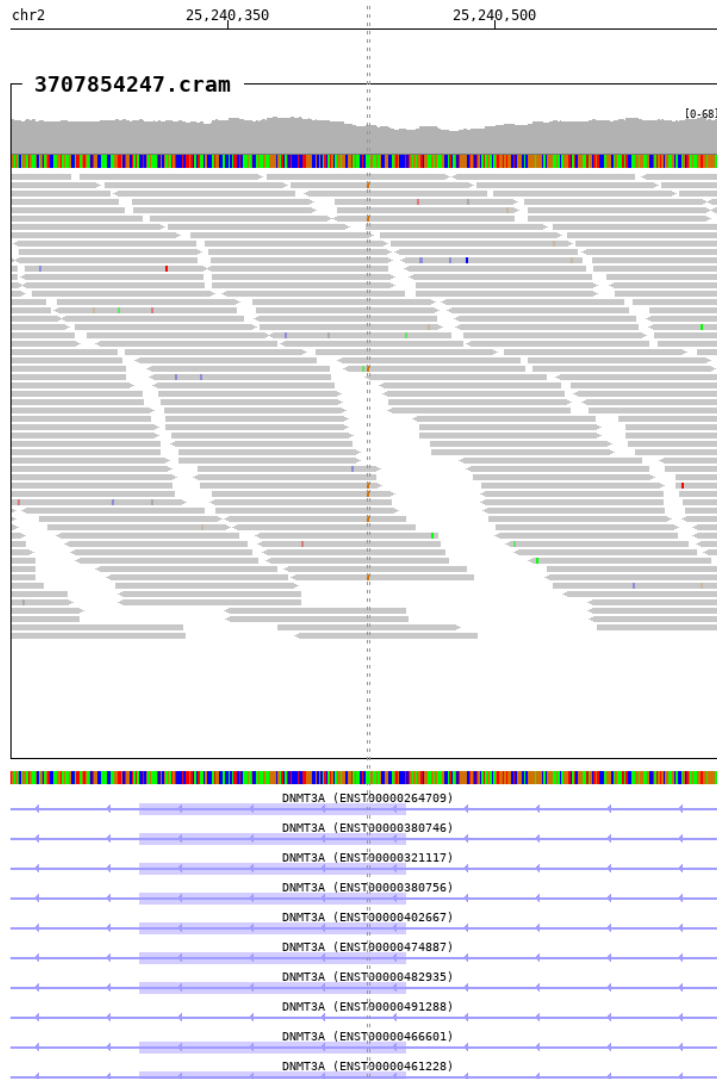

10.62. chr2\_25240430\_GAAGAGCC/-

| SampleID | Variants (GRCh38)        | Ref_depth | Alt_depth | Gene   | Consequence        |
|----------|--------------------------|-----------|-----------|--------|--------------------|
| 10281494 | chr2_25240430_GAAGAGCC/- | 30        | 6         | DNMT3A | frameshift_variant |

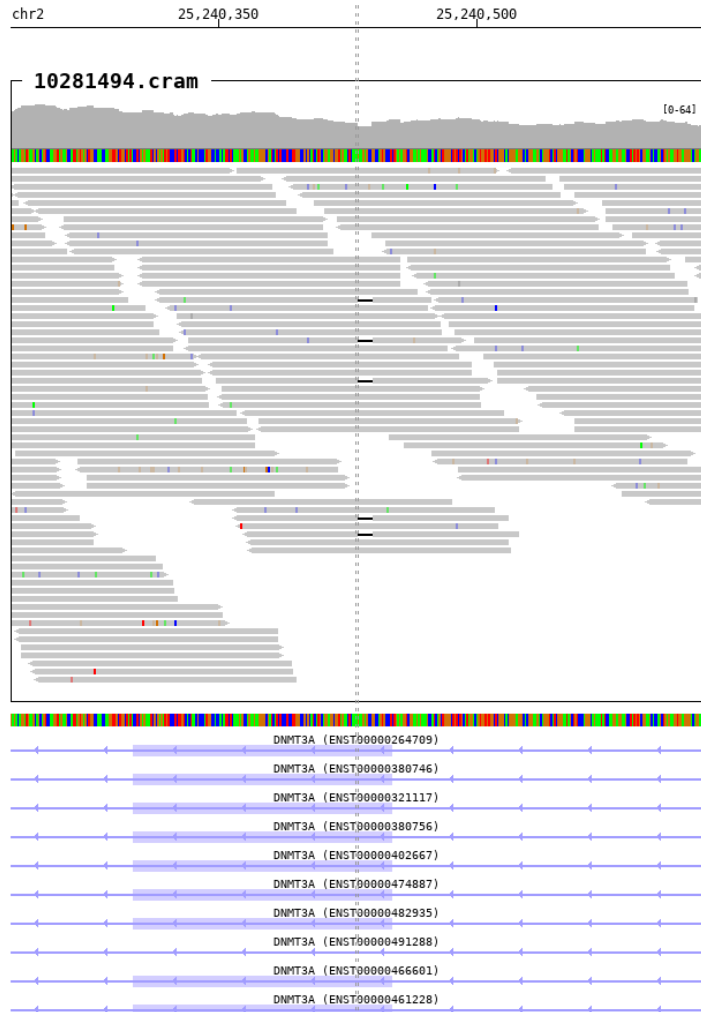

10.63. chr2\_25240639\_C/T

| SampleID  | Variants (GRCh38) | Ref_depth | Alt_depth | Gene   | Consequence          |
|-----------|-------------------|-----------|-----------|--------|----------------------|
| 110101115 | chr2_25240639_C/T | 43        | 3         | DNMT3A | splice_donor_variant |

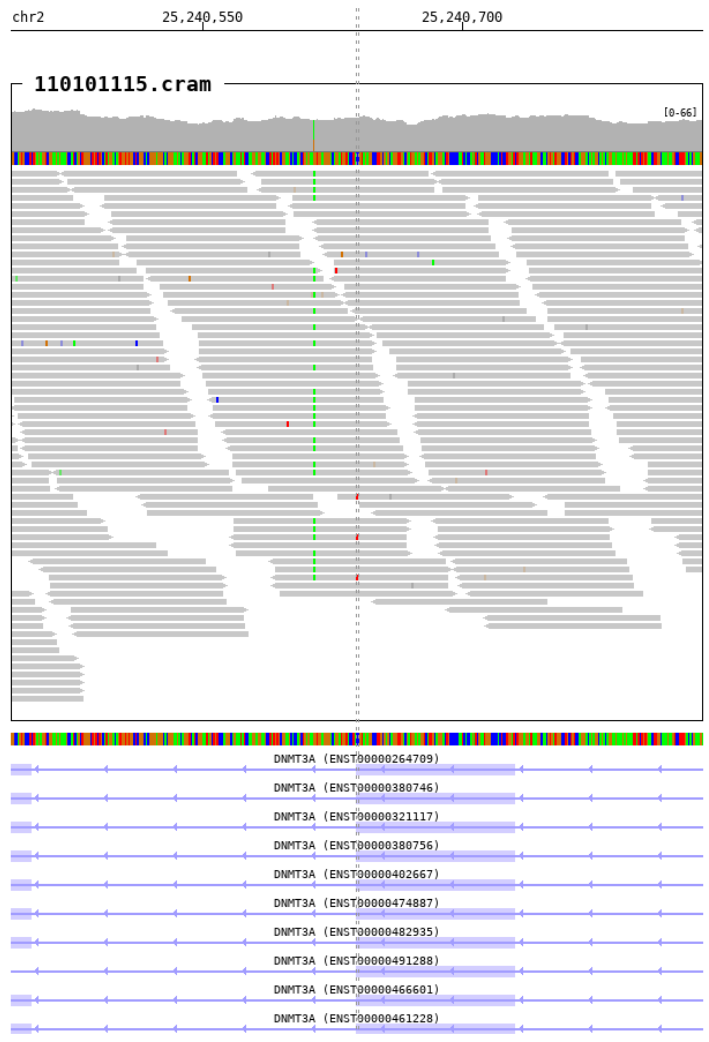

10.64. chr2\_25240666\_A/T

| SampleID | Variants (GRCh38) | Ref_depth | Alt_depth | Gene          | Consequence      |
|----------|-------------------|-----------|-----------|---------------|------------------|
| 10312575 | chr2_25240666_A/T | 67        | 6         | <i>DNMT3A</i> | missense_variant |

chr2 25,240,550 25,240,700 25,240,850

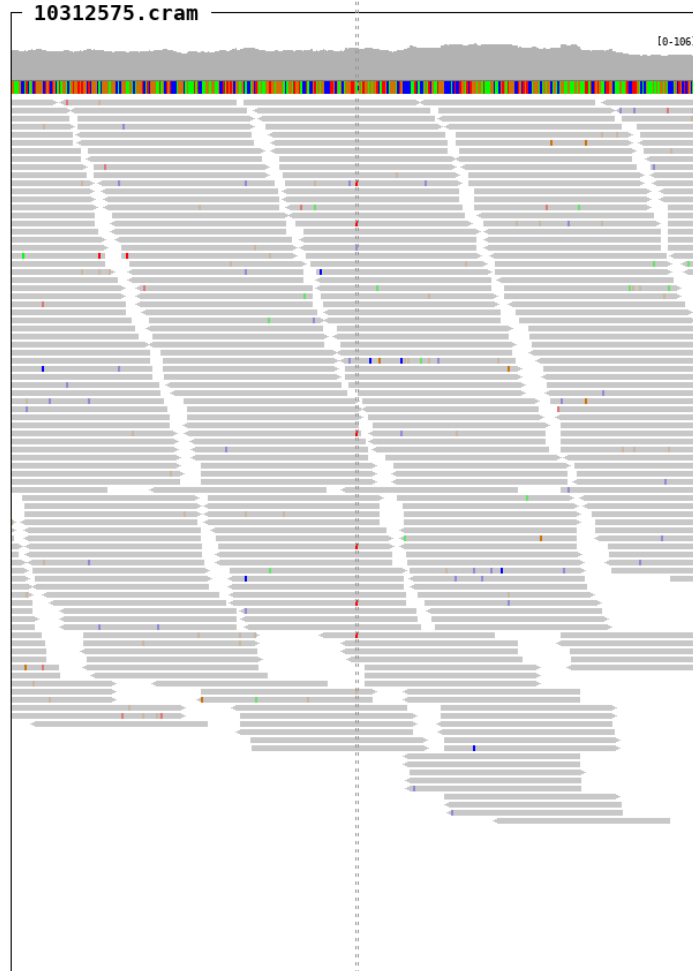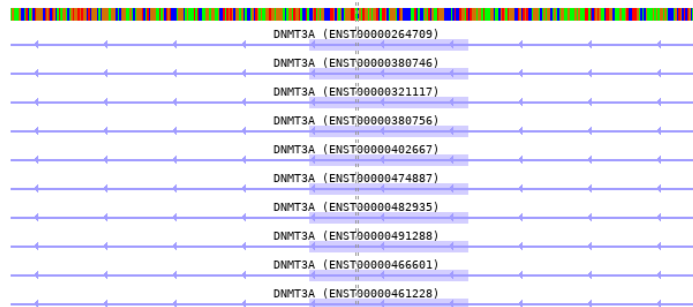

10.65. chr2\_25240667\_C/A

| SampleID  | Variants (GRCh38) | Ref_depth | Alt_depth | Gene   | Consequence      |
|-----------|-------------------|-----------|-----------|--------|------------------|
| 110106395 | chr2_25240667_C/A | 34        | 12        | DNMT3A | missense_variant |

chr2 25,240,550 25,240,700 25,240,85

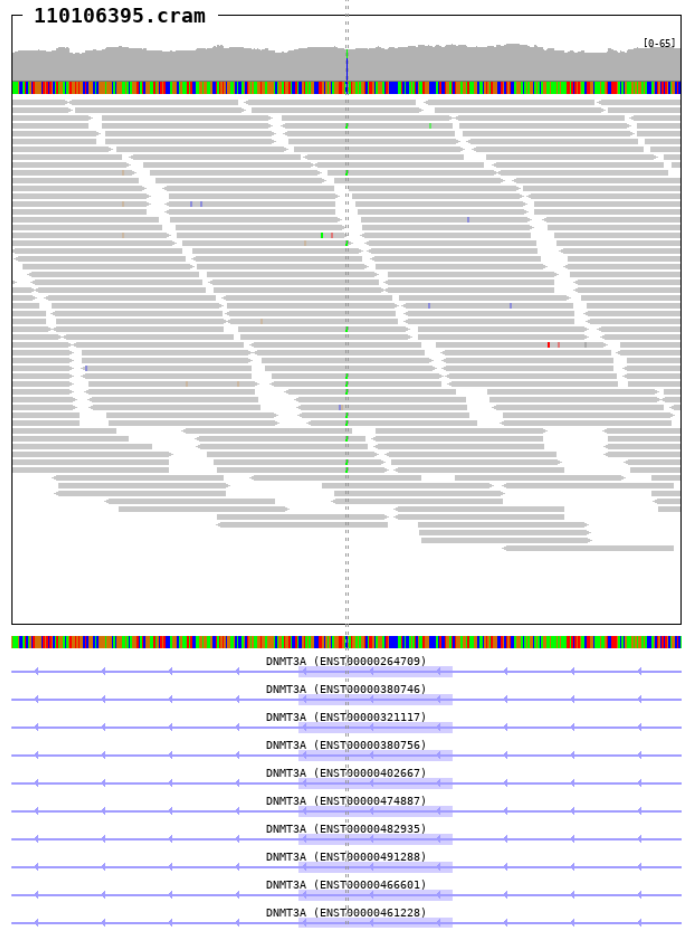

10.66. chr2\_25240667\_C/T

| SampleID | Variants (GRCh38) | Ref_depth | Alt_depth | Gene   | Consequence      |
|----------|-------------------|-----------|-----------|--------|------------------|
| 11311172 | chr2_25240667_C/T | 24        | 7         | DNMT3A | missense_variant |

chr2 25,240,550 25,240,700 25,240,85

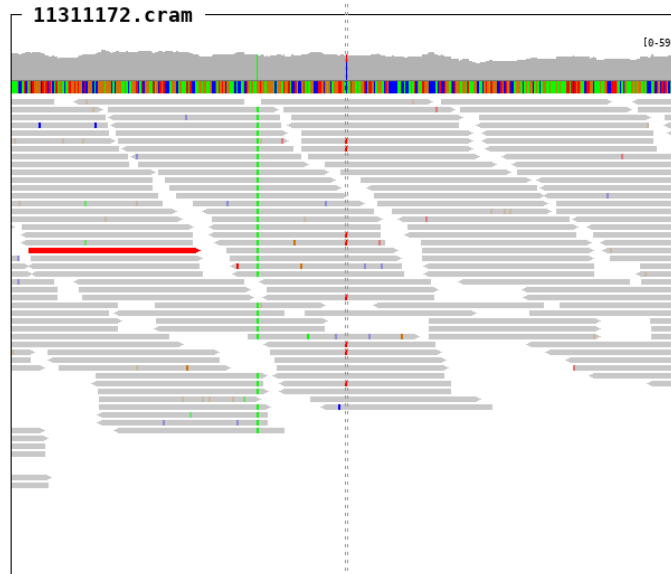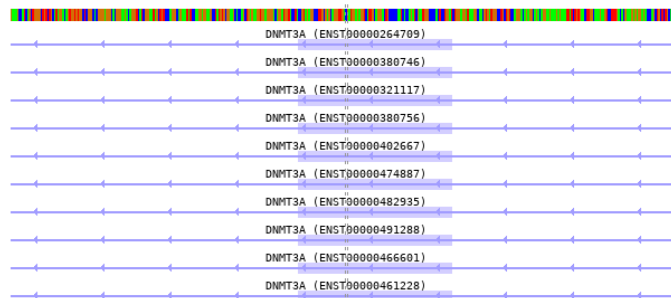

10.67. chr2\_25240699\_A/G

| SampleID  | Variants (GRCh38) | Ref_depth | Alt_depth | Gene          | Consequence      |
|-----------|-------------------|-----------|-----------|---------------|------------------|
| 101103208 | chr2_25240699_A/G | 35        | 7         | <i>DNMT3A</i> | missense_variant |
| 112300367 | chr2_25240699_A/G | 25        | 6         | <i>DNMT3A</i> | missense_variant |

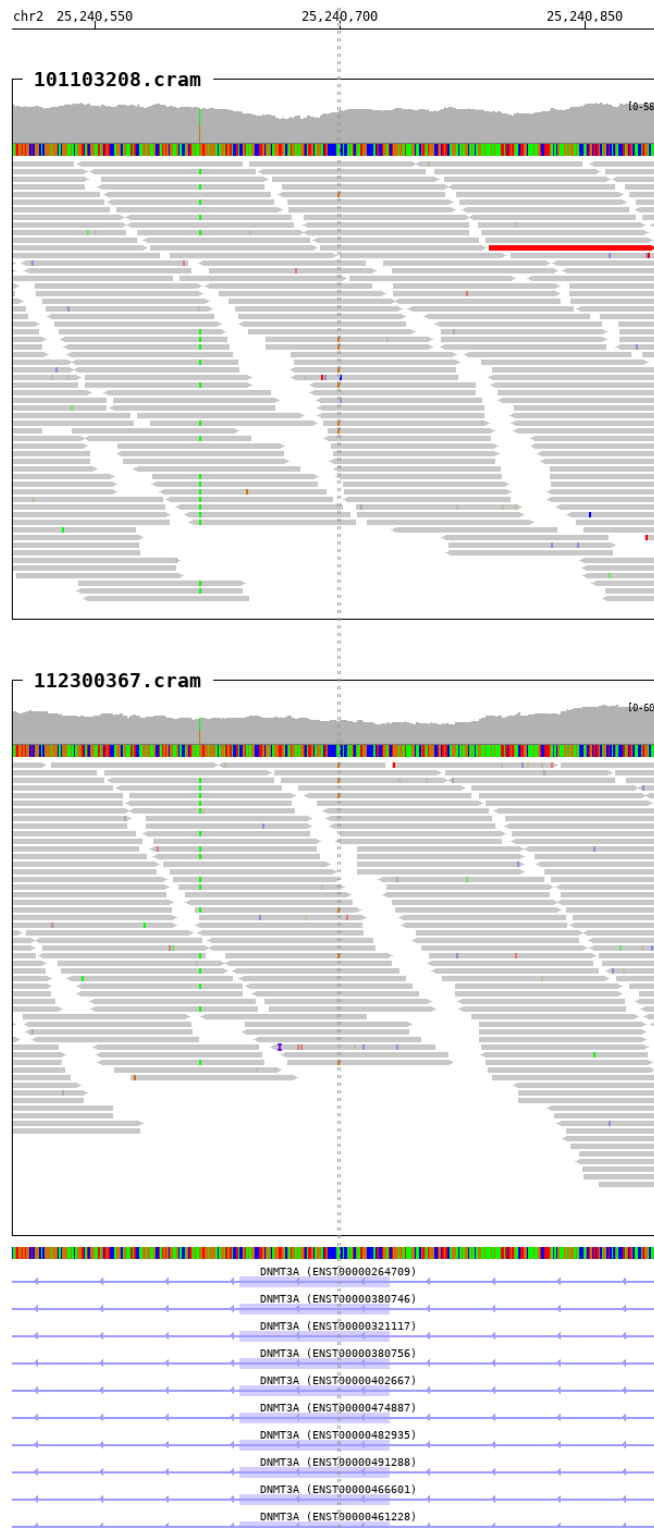

10.68. chr2\_25240720\_C/T

| SampleID | Variants (GRCh38) | Ref_depth | Alt_depth | Gene   | Consequence |
|----------|-------------------|-----------|-----------|--------|-------------|
| 60524    | chr2_25240720_C/T | 38        | 4         | DNMT3A | stop_gained |

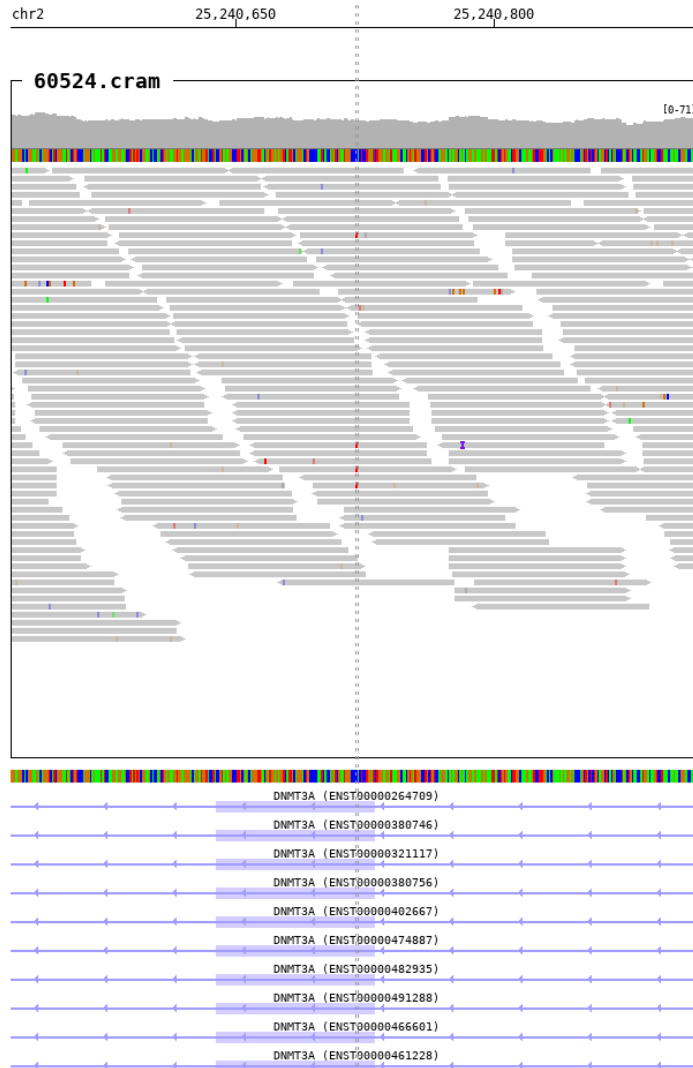

10.69. chr2\_25240723\_C/-

| SampleID | Variants (GRCh38) | Ref_depth | Alt_depth | Gene   | Consequence        |
|----------|-------------------|-----------|-----------|--------|--------------------|
| 10511665 | chr2_25240723_C/- | 48        | 4         | DNMT3A | frameshift_variant |

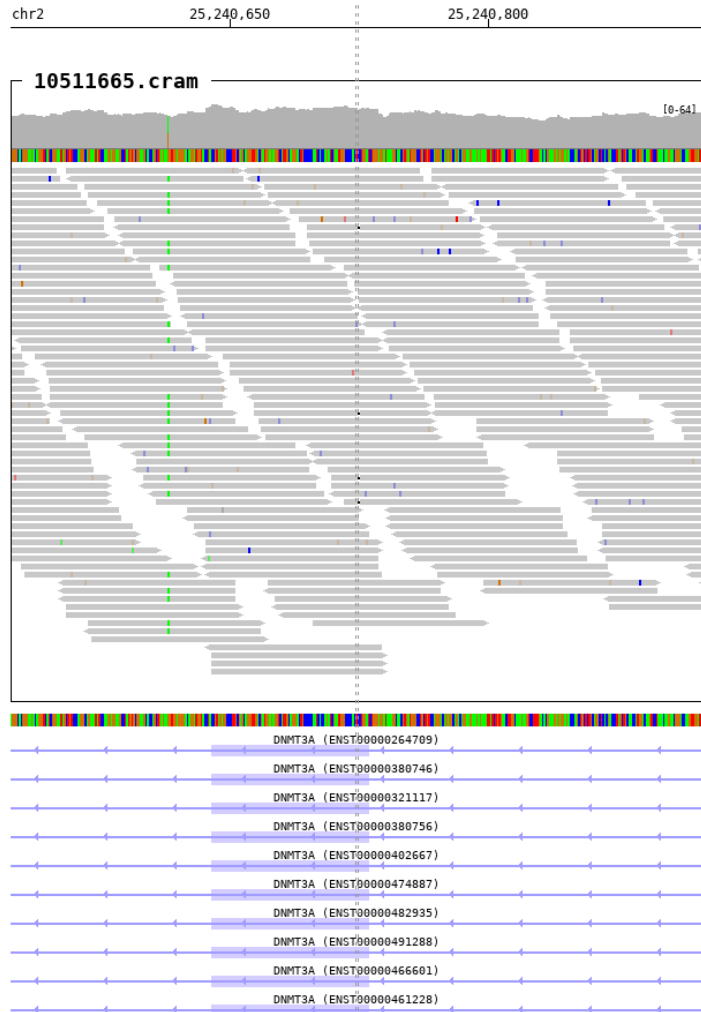

10.70. chr2\_25240732\_T/C

| SampleID  | Variants (GRCh38) | Ref_depth | Alt_depth | Gene          | Consequence             |
|-----------|-------------------|-----------|-----------|---------------|-------------------------|
| 112304328 | chr2_25240732_T/C | 34        | 6         | <i>DNMT3A</i> | splice_acceptor_variant |
| 64690     | chr2_25240732_T/C | 188       | 6         | <i>DNMT3A</i> | splice_acceptor_variant |

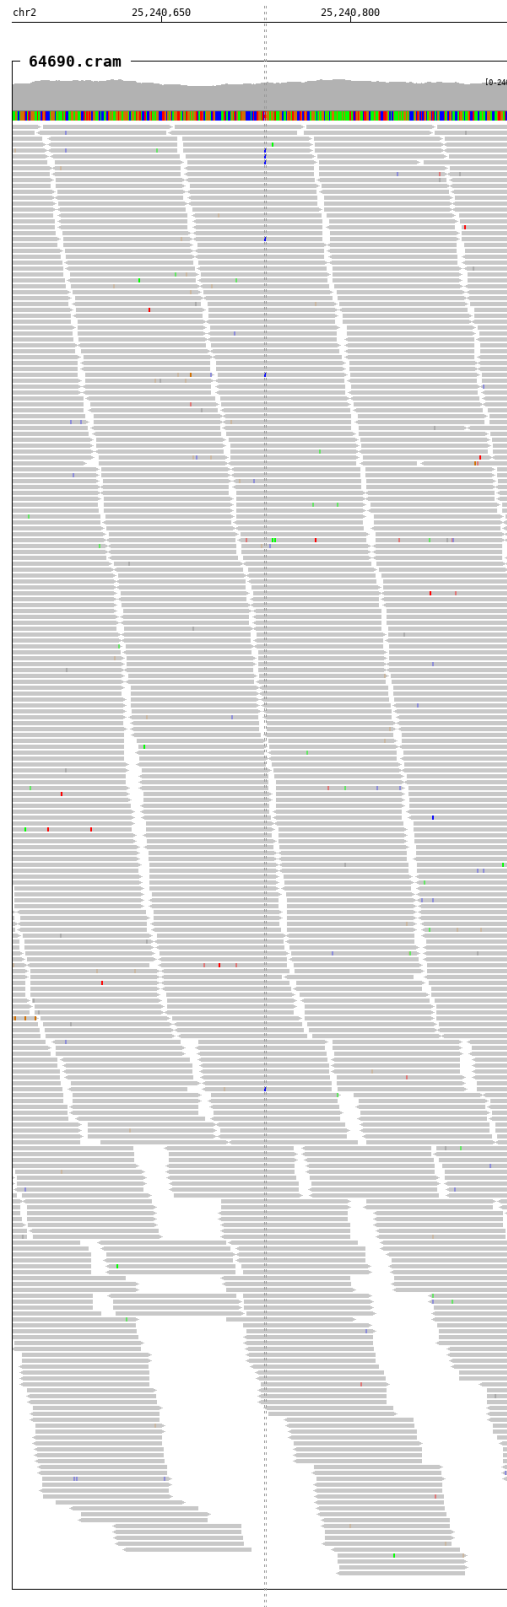

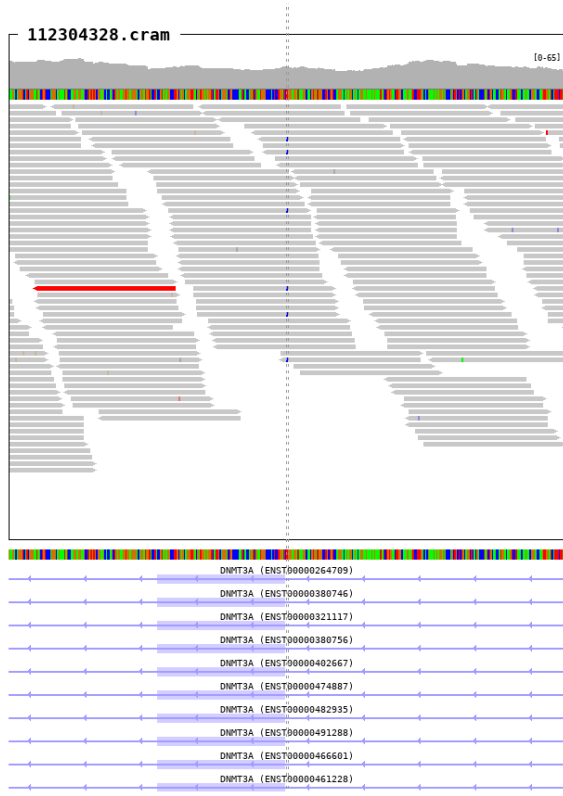

10.71. chr2\_25241561\_C/T

| SampleID | Variants (GRCh38) | Ref_depth | Alt_depth | Gene   | Consequence          |
|----------|-------------------|-----------|-----------|--------|----------------------|
| 67384    | chr2_25241561_C/T | 26        | 5         | DNMT3A | splice_donor_variant |

chr2 25,241,450 25,241,600 25,241,750

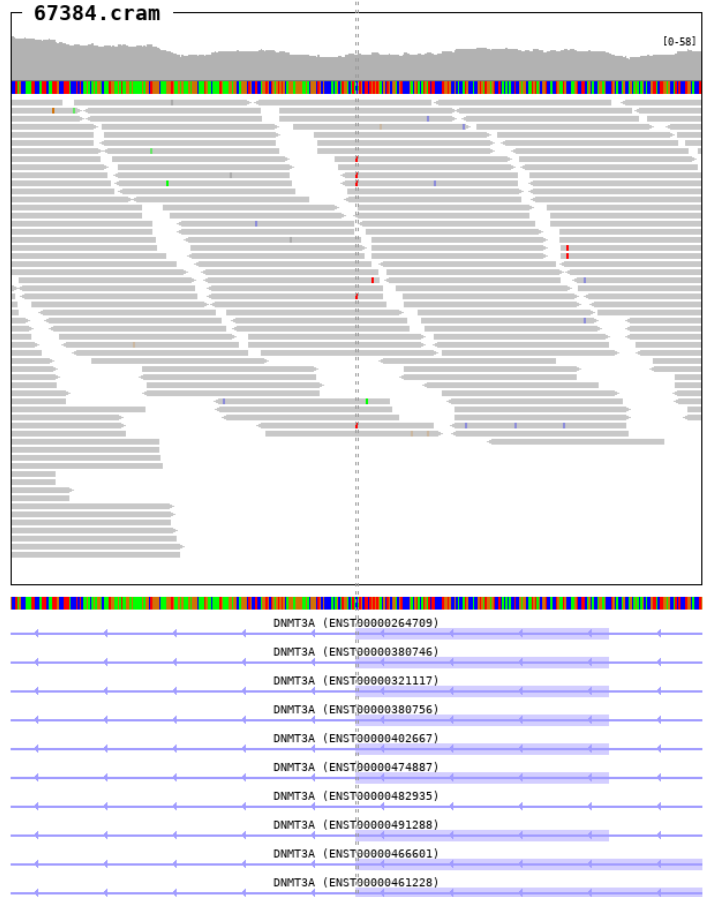

10.72. chr2\_25241567\_T/A

| SampleID  | Variants (GRCh38) | Ref_depth | Alt_depth | Gene   | Consequence |
|-----------|-------------------|-----------|-----------|--------|-------------|
| 100601560 | chr2_25241567_T/A | 29        | 5         | DNMT3A | stop_gained |

chr2 25,241,450 25,241,600 25,241,750

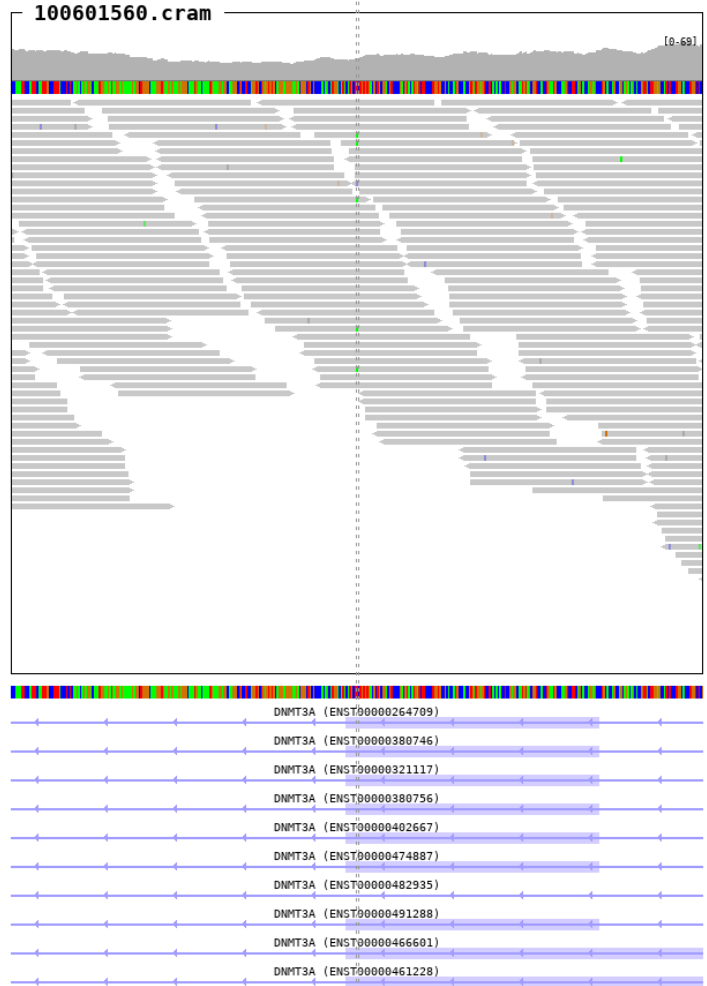

10.73. chr2\_25241568\_TG/-

| SampleID | Variants (GRCh38)  | Ref_depth | Alt_depth | Gene          | Consequence        |
|----------|--------------------|-----------|-----------|---------------|--------------------|
| 12390195 | chr2_25241568_TG/- | 40        | 6         | <i>DNMT3A</i> | frameshift_variant |

chr2 25,241,450 25,241,600 25,241,75

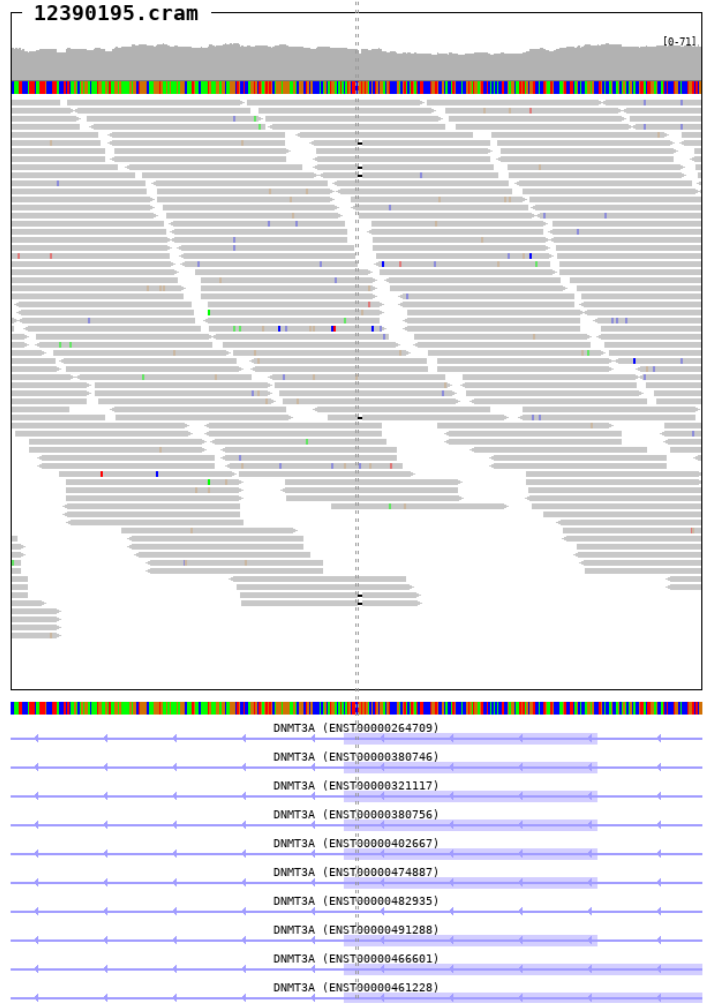

10.74. chr2\_25241581\_C/T

| SampleID | Variants (GRCh38) | Ref_depth | Alt_depth | Gene   | Consequence      |
|----------|-------------------|-----------|-----------|--------|------------------|
| 12290267 | chr2_25241581_C/T | 34        | 3         | DNMT3A | missense_variant |

chr2 25,241,450 25,241,600 25,241,750

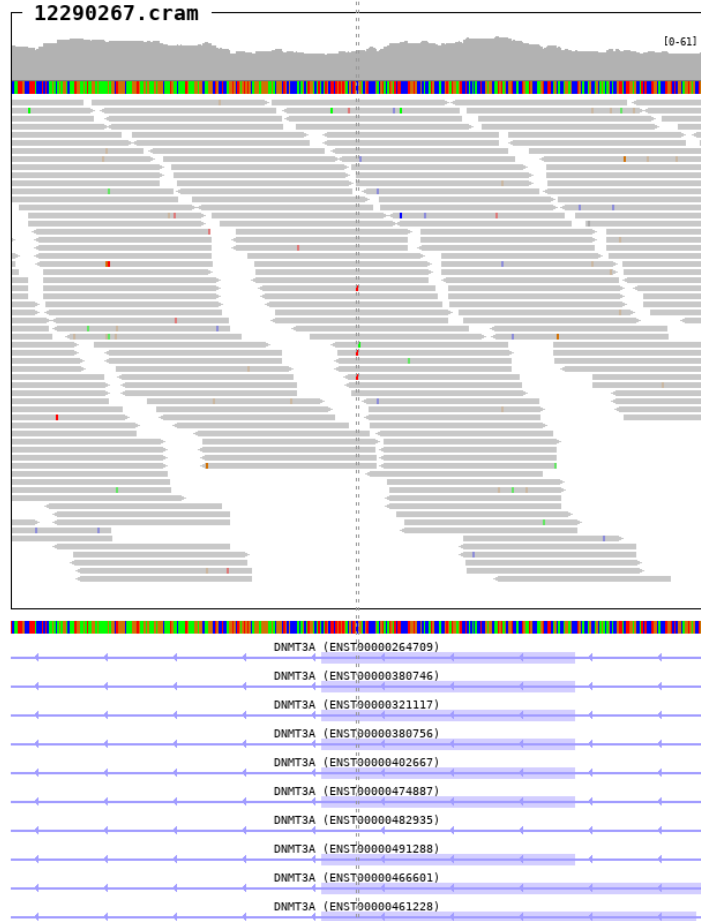

10.75. chr2\_25241583\_ACGTCCCCGACGTACA/-

| SampleID | Variants (GRCh38)                | Ref_depth | Alt_depth | Gene   | Consequence        |
|----------|----------------------------------|-----------|-----------|--------|--------------------|
| 62729    | chr2_25241583_ACGTCCCCGACGTACA/- | 173       | 10        | DNMT3A | frameshift_variant |

chr2 25,241,450 25,241,600 25,241,750

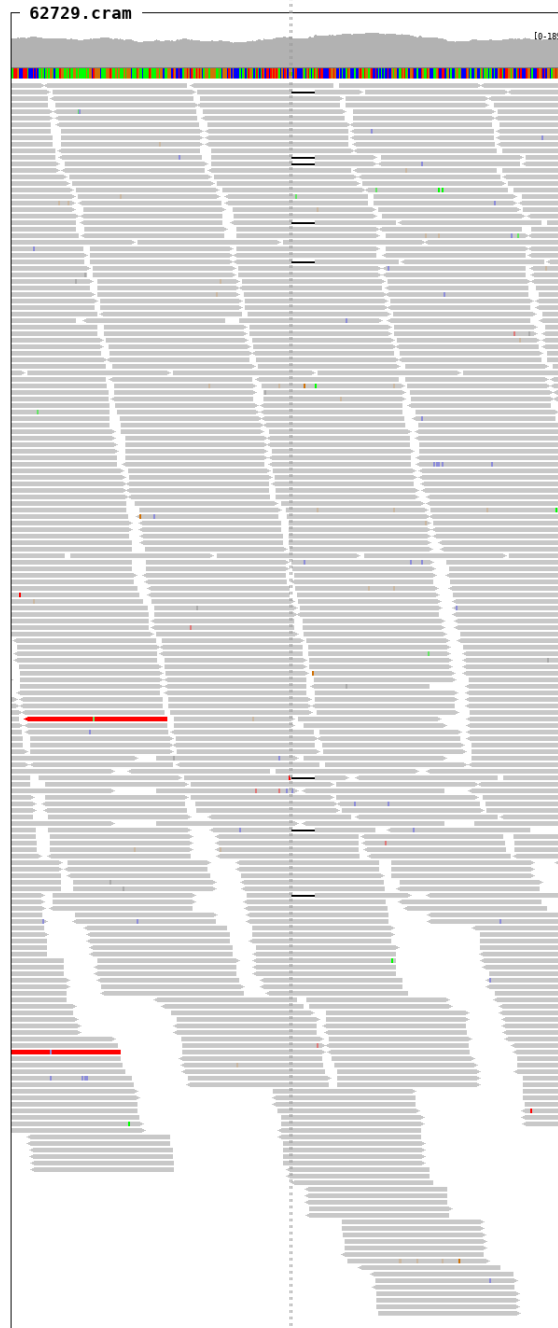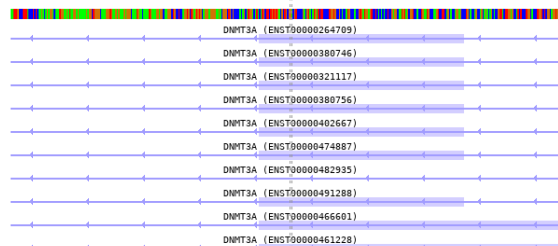

10.76. chr2\_25241600\_G/-

| SampleID | Variants (GRCh38) | Ref_depth | Alt_depth | Gene   | Consequence        |
|----------|-------------------|-----------|-----------|--------|--------------------|
| 10012600 | chr2_25241600_G/- | 31        | 4         | DNMT3A | frameshift_variant |

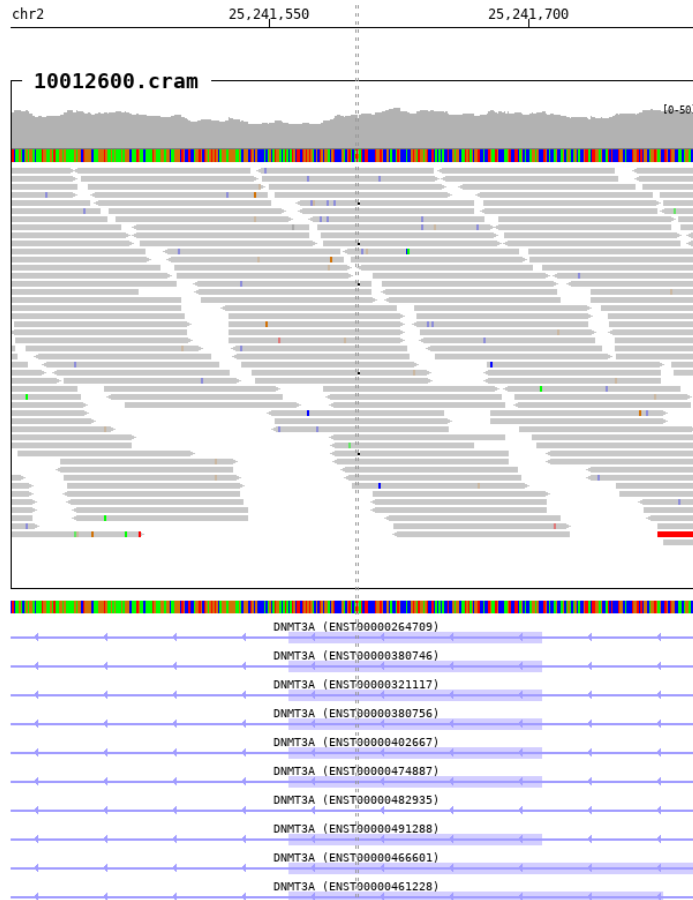

10.77. chr2\_25241612\_G/A

| SampleID | Variants (GRCh38) | Ref_depth | Alt_depth | Gene          | Consequence |
|----------|-------------------|-----------|-----------|---------------|-------------|
| 10511662 | chr2_25241612_G/A | 32        | 6         | <i>DNMT3A</i> | stop_gained |

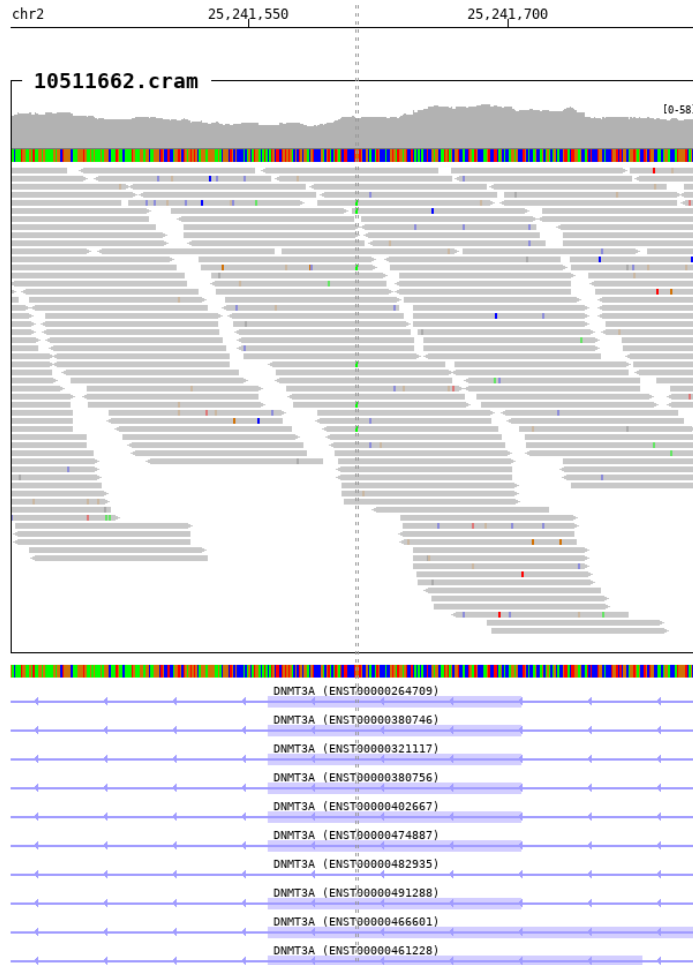

10.78. chr2\_25241636\_G/-

| SampleID  | Variants (GRCh38) | Ref_depth | Alt_depth | Gene   | Consequence        |
|-----------|-------------------|-----------|-----------|--------|--------------------|
| 112404502 | chr2_25241636_G/- | 39        | 6         | DNMT3A | frameshift_variant |

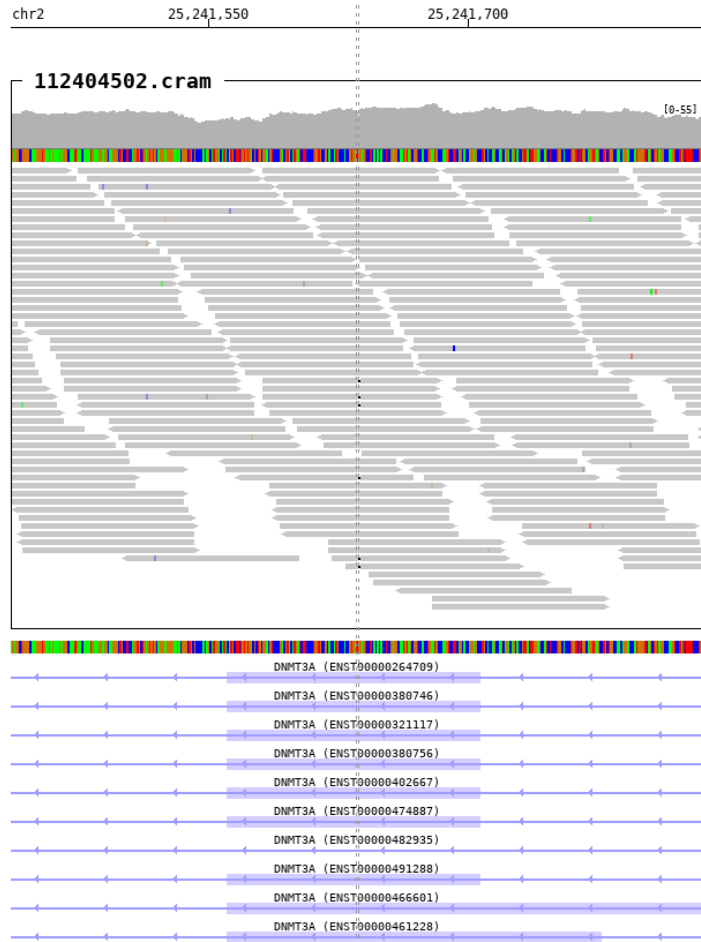

10.79. chr2\_25241668\_C/T

| SampleID  | Variants (GRCh38) | Ref_depth | Alt_depth | Gene   | Consequence      |
|-----------|-------------------|-----------|-----------|--------|------------------|
| 101102968 | chr2_25241668_C/T | 37        | 8         | DNMT3A | missense_variant |

chr2 25,241,550 25,241,700 25,241,85

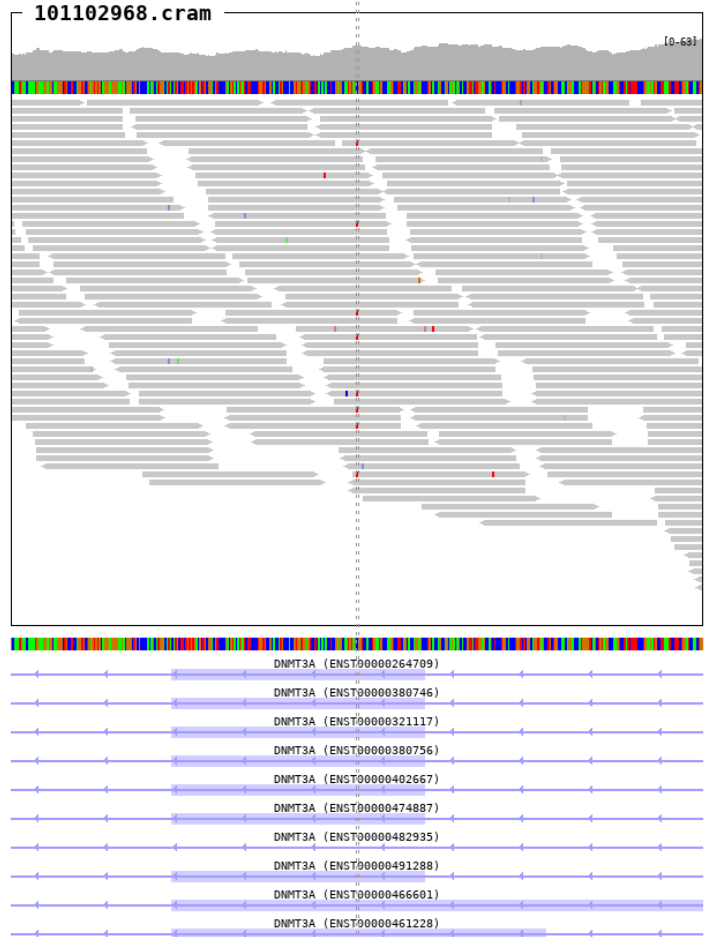

10.80. chr2\_25241675\_C/T

| SampleID  | Variants (GRCh38) | Ref_depth | Alt_depth | Gene          | Consequence      |
|-----------|-------------------|-----------|-----------|---------------|------------------|
| 112301940 | chr2_25241675_C/T | 43        | 7         | <i>DNMT3A</i> | missense_variant |
| 11540162  | chr2_25241675_C/T | 36        | 4         | <i>DNMT3A</i> | missense_variant |

chr2 25,241,550 25,241,700 25,241,850

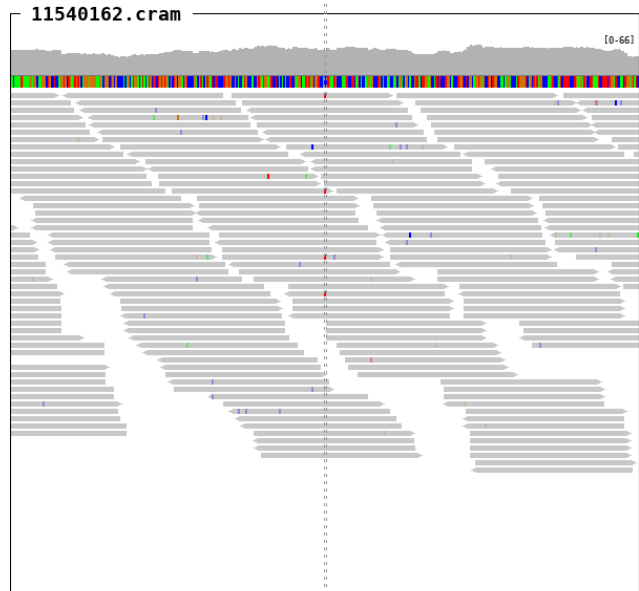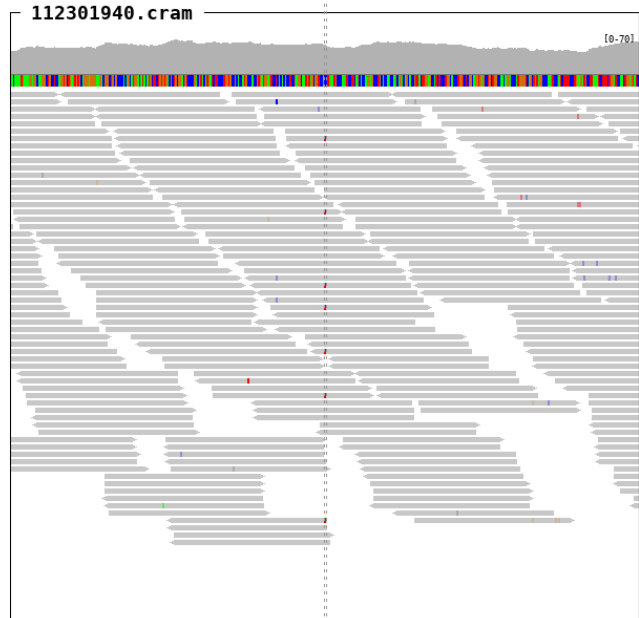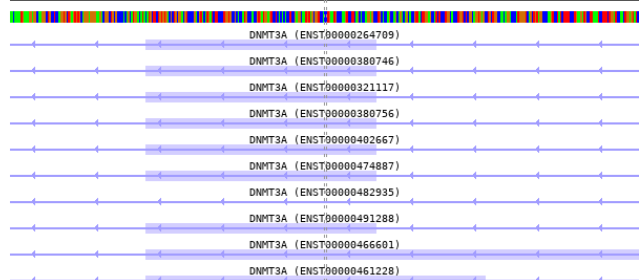

10.81. chr2\_25241708\_C/A

| SampleID | Variants (GRCh38) | Ref_depth | Alt_depth | Gene   | Consequence             |
|----------|-------------------|-----------|-----------|--------|-------------------------|
| 10511895 | chr2_25241708_C/A | 55        | 4         | DNMT3A | splice_acceptor_variant |

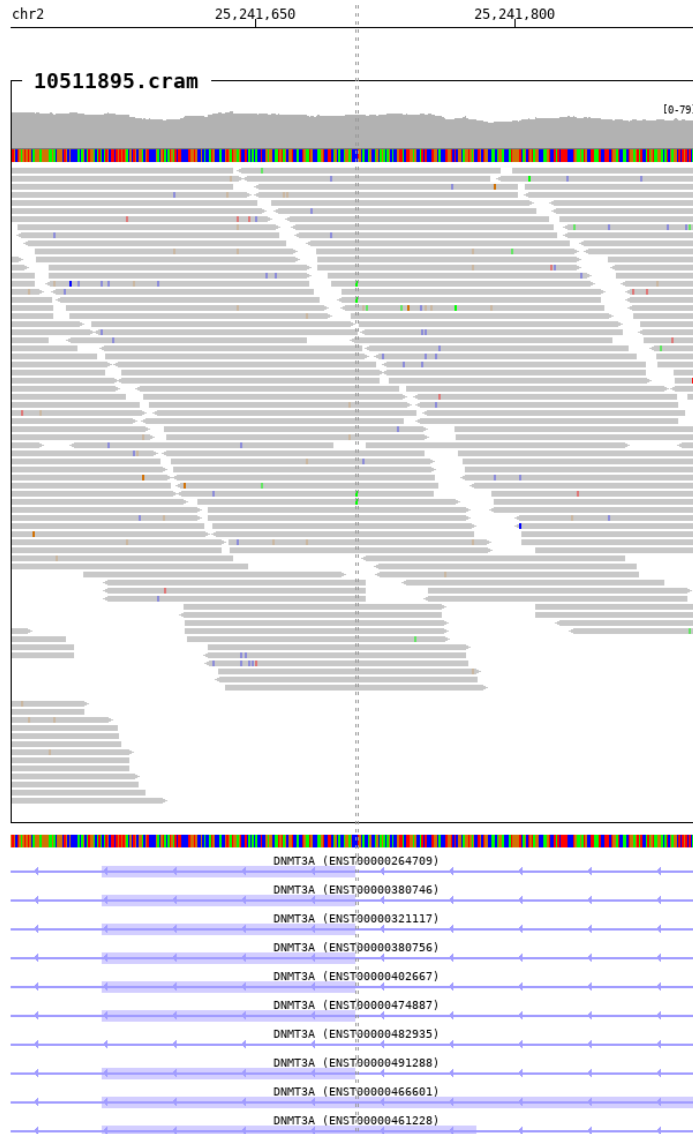

10.82. chr2\_25243907\_-/T

| SampleID  | Variants (GRCh38) | Ref_depth | Alt_depth | Gene   | Consequence        |
|-----------|-------------------|-----------|-----------|--------|--------------------|
| 102108668 | chr2_25243907_-/T | 29        | 6         | DNMT3A | frameshift_variant |

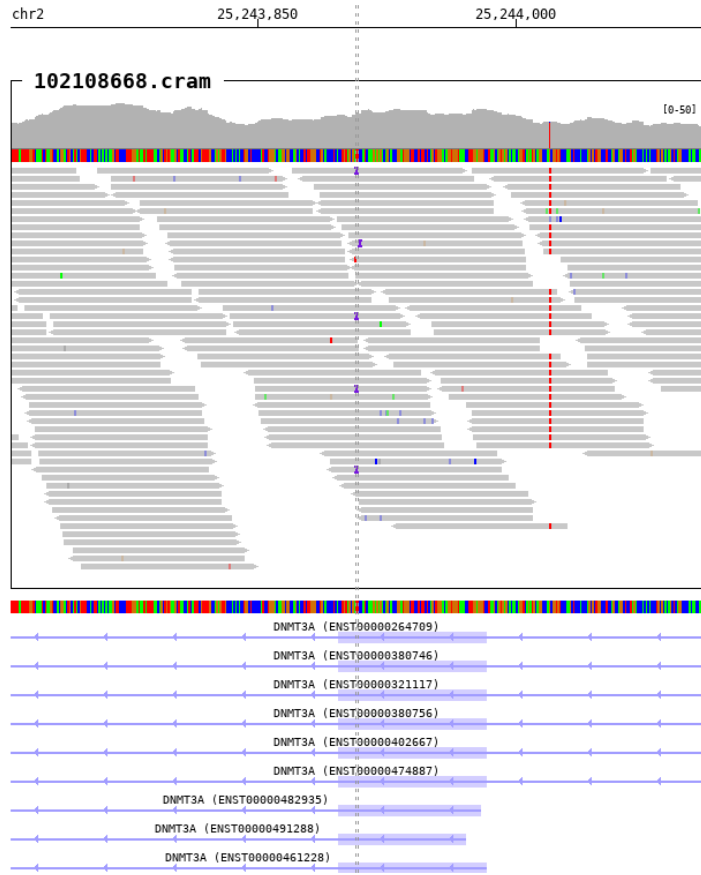

10.83. chr2\_25243915\_-/T

| SampleID  | Variants (GRCh38) | Ref_depth | Alt_depth | Gene   | Consequence        |
|-----------|-------------------|-----------|-----------|--------|--------------------|
| 101606798 | chr2_25243915_-/T | 35        | 4         | DNMT3A | frameshift_variant |

chr2 25,243,850 25,244,000

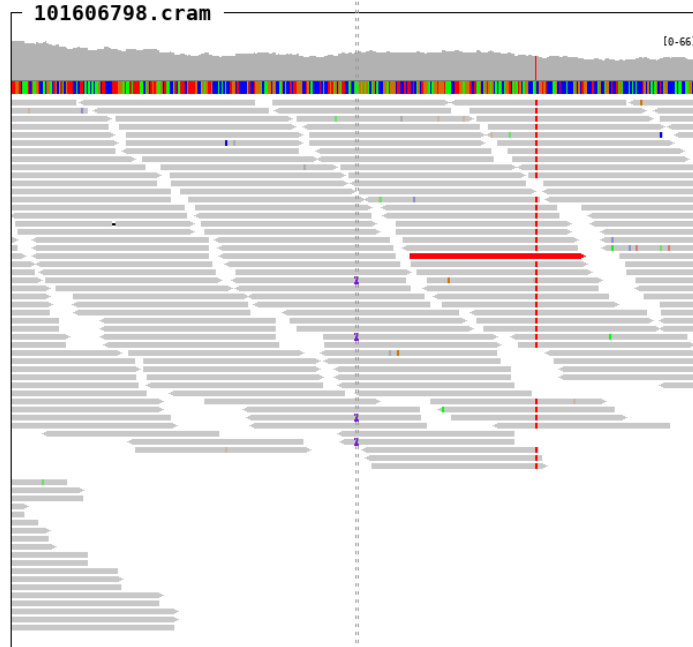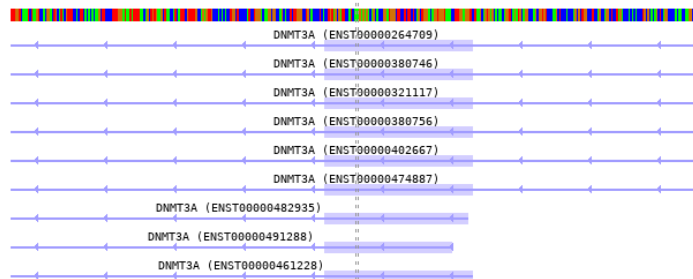

10.84. chr2\_25243921\_G/A

| SampleID  | Variants (GRCh38) | Ref_depth | Alt_depth | Gene   | Consequence      |
|-----------|-------------------|-----------|-----------|--------|------------------|
| 110105868 | chr2_25243921_G/A | 52        | 4         | DNMT3A | missense_variant |

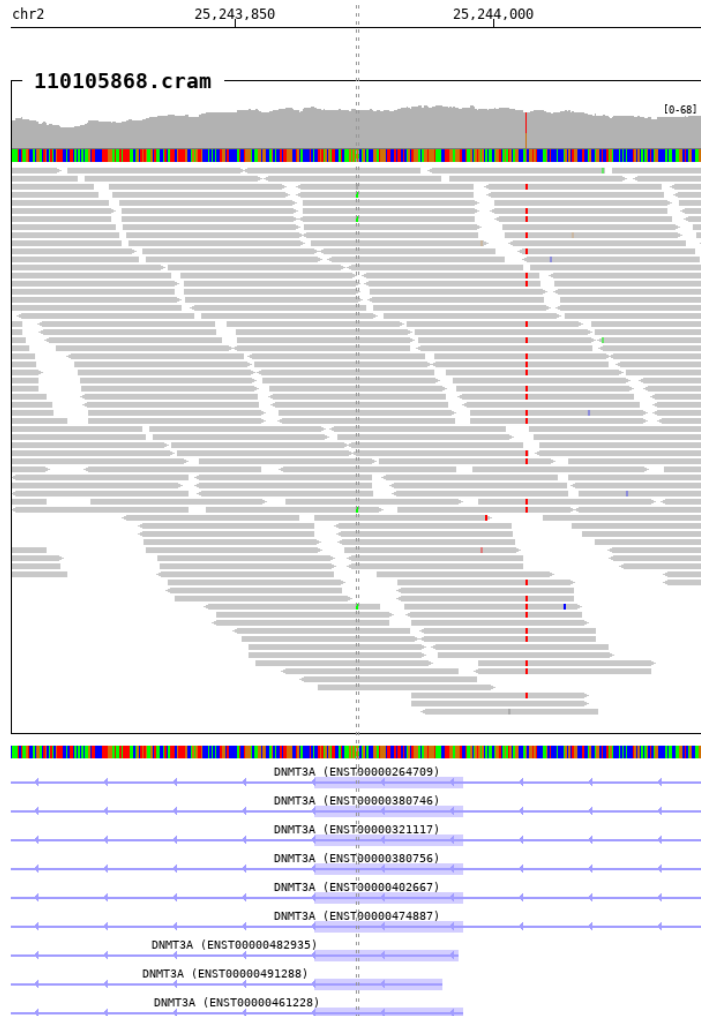

10.85. chr2\_25243927\_-1A

| SampleID  | Variants (GRCh38) | Ref_depth | Alt_depth | Gene   | Consequence        |
|-----------|-------------------|-----------|-----------|--------|--------------------|
| 102106986 | chr2_25243927_-1A | 47        | 6         | DNMT3A | frameshift_variant |

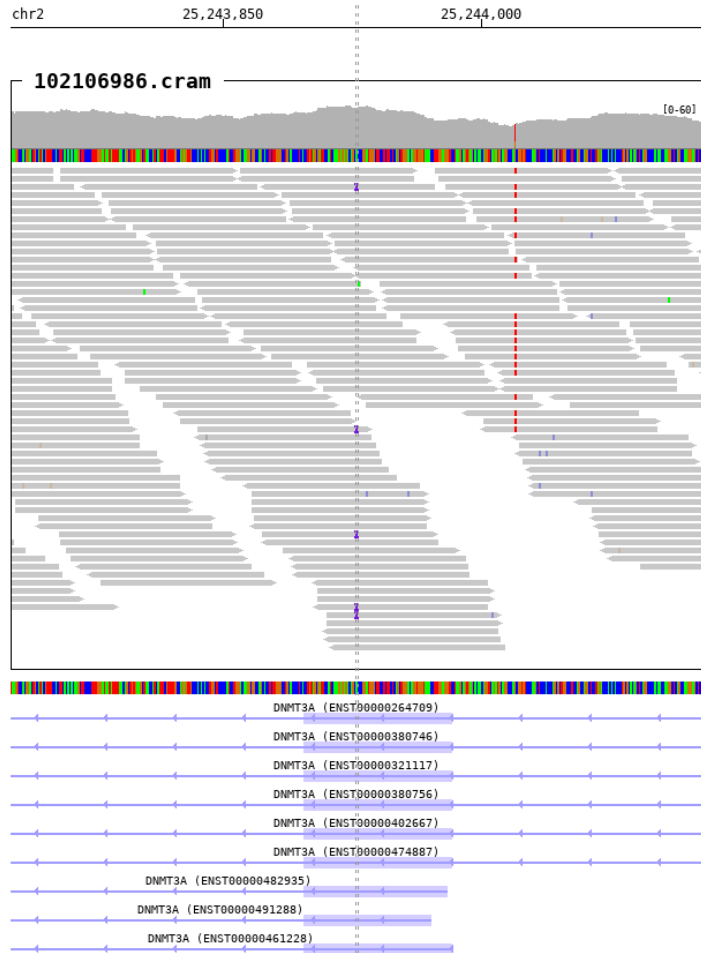

10.86. chr2\_25243930\_C/T

| SampleID  | Variants (GRCh38) | Ref_depth | Alt_depth | Gene          | Consequence      |
|-----------|-------------------|-----------|-----------|---------------|------------------|
| 100602321 | chr2_25243930_C/T | 32        | 4         | <i>DNMT3A</i> | missense_variant |
| 10770621  | chr2_25243930_C/T | 35        | 5         | <i>DNMT3A</i> | missense_variant |
| 12390291  | chr2_25243930_C/T | 35        | 3         | <i>DNMT3A</i> | missense_variant |

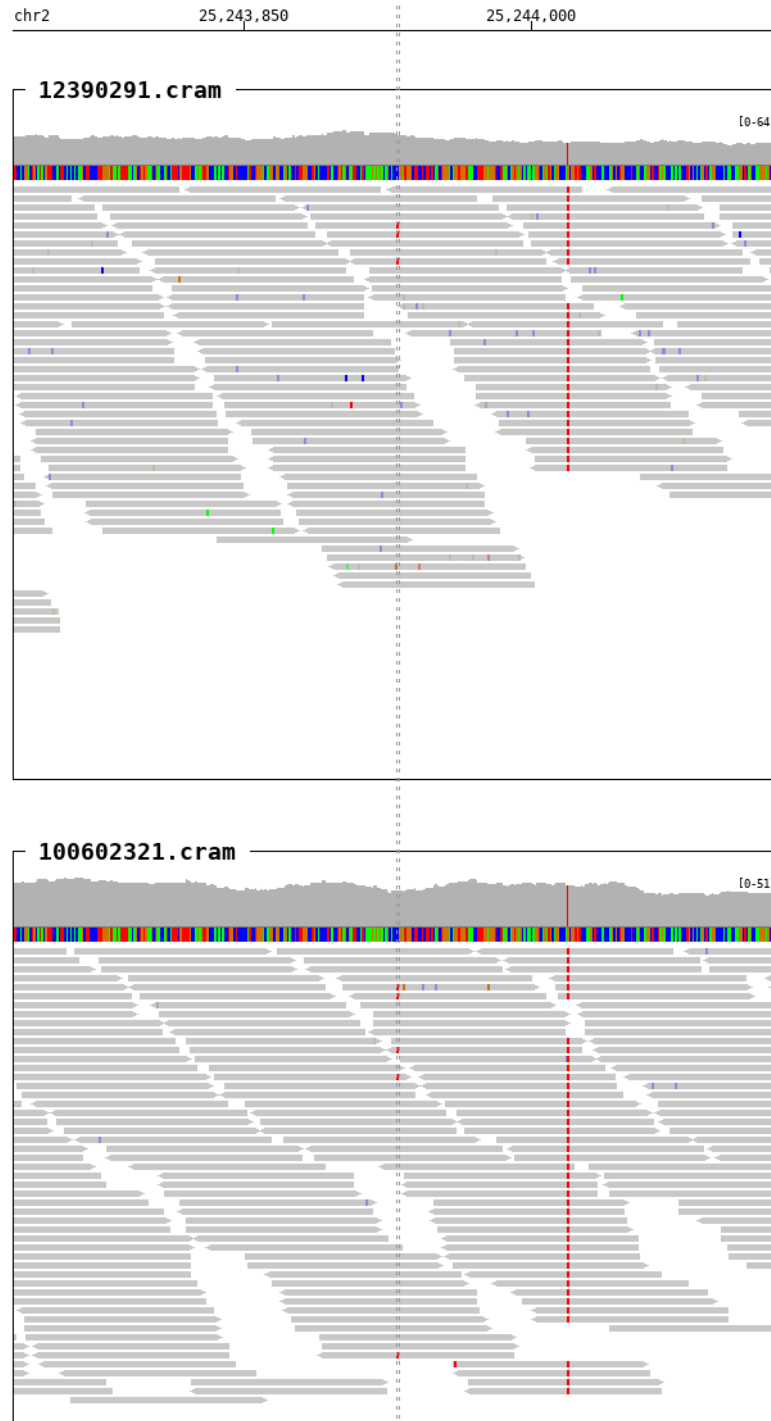

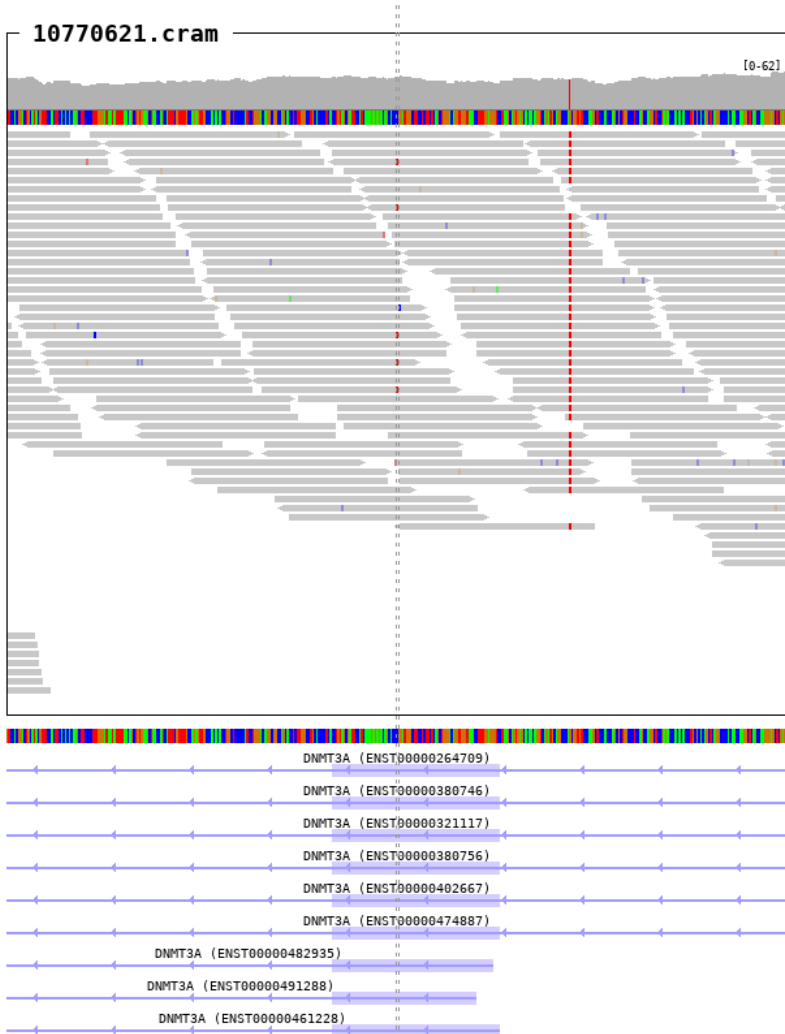

10.87. chr2\_25243931\_G/A

| SampleID | Variants (GRCh38) | Ref_depth | Alt_depth | Gene          | Consequence      |
|----------|-------------------|-----------|-----------|---------------|------------------|
| 10310435 | chr2_25243931_G/A | 30        | 4         | <i>DNMT3A</i> | missense_variant |
| 65579    | chr2_25243931_G/A | 33        | 9         | <i>DNMT3A</i> | missense_variant |

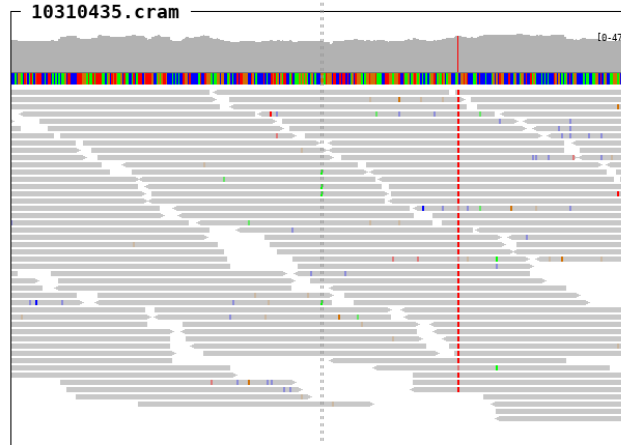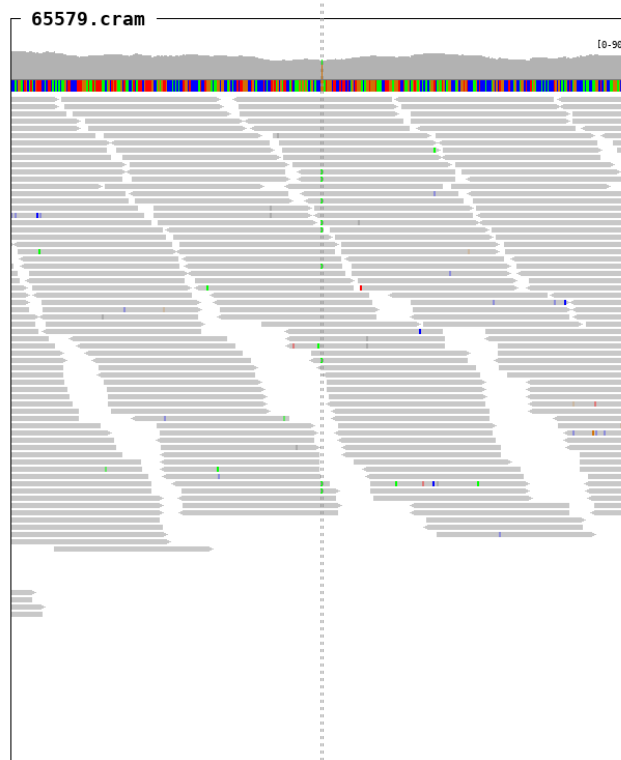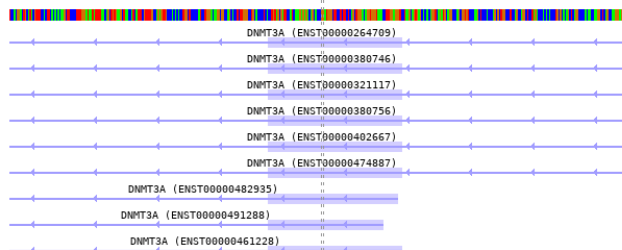

10.88. chr2\_25243931\_G/C/A

| SampleID   | Variants (GRCh38)   | Ref_depth | Alt_depth | Gene   | Consequence      |
|------------|---------------------|-----------|-----------|--------|------------------|
| 11311050   | chr2_25243931_G/C/A | 57        | 5         | DNMT3A | missense_variant |
| 5133211214 | chr2_25243931_G/C/A | 37        | 13        | DNMT3A | missense_variant |

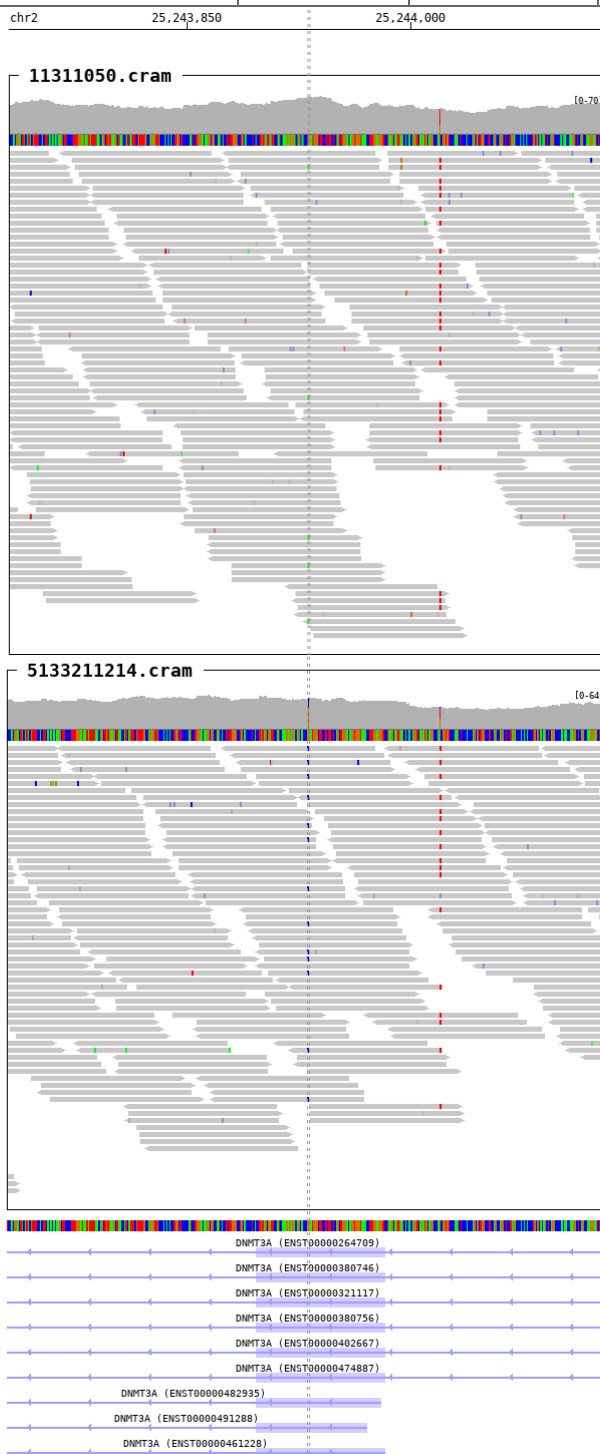

10.89. chr2\_25243938\_T/-

| SampleID  | Variants (GRCh38) | Ref_depth | Alt_depth | Gene   | Consequence        |
|-----------|-------------------|-----------|-----------|--------|--------------------|
| 101607763 | chr2_25243938_T/- | 30        | 5         | DNMT3A | frameshift_variant |

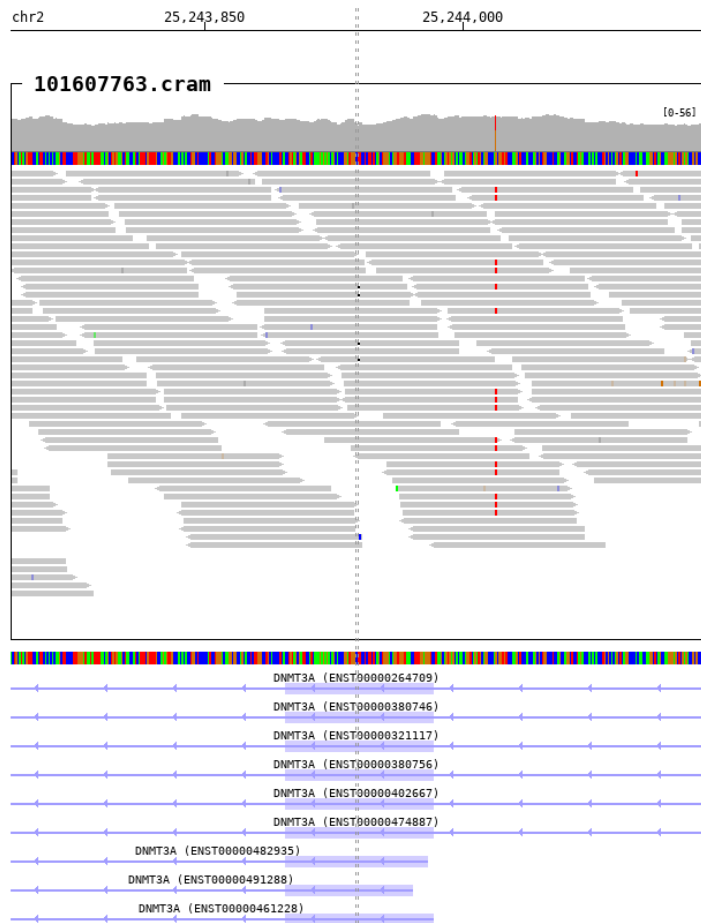

10.90. chr2\_25244190\_G/A

| SampleID | Variants (GRCh38) | Ref_depth | Alt_depth | Gene   | Consequence |
|----------|-------------------|-----------|-----------|--------|-------------|
| 10012662 | chr2_25244190_G/A | 22        | 5         | DNMT3A | stop_gained |

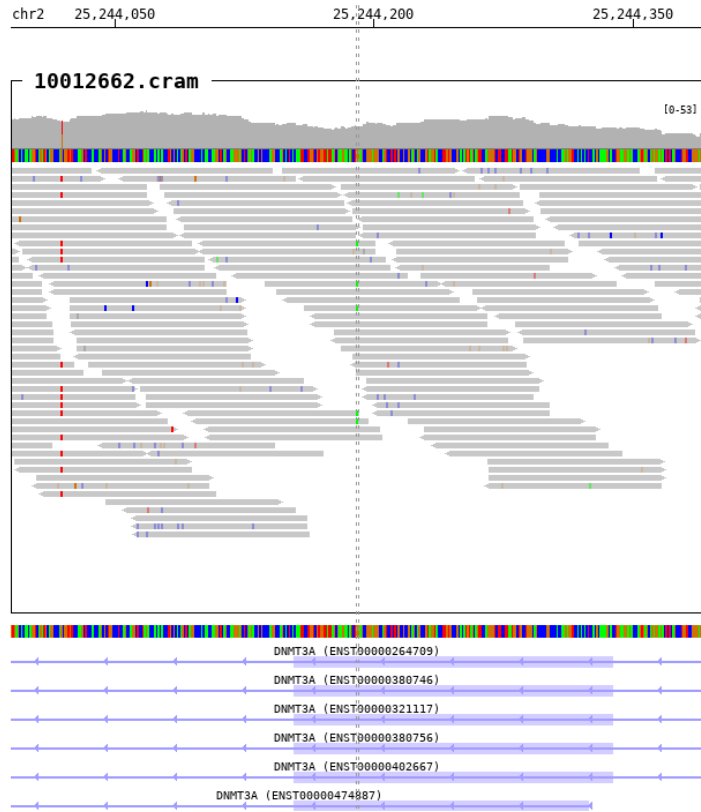

10.91. chr2\_25244204\_C/T

| SampleID  | Variants (GRCh38) | Ref_depth | Alt_depth | Gene   | Consequence |
|-----------|-------------------|-----------|-----------|--------|-------------|
| 110105842 | chr2_25244204_C/T | 45        | 3         | DNMT3A | stop_gained |

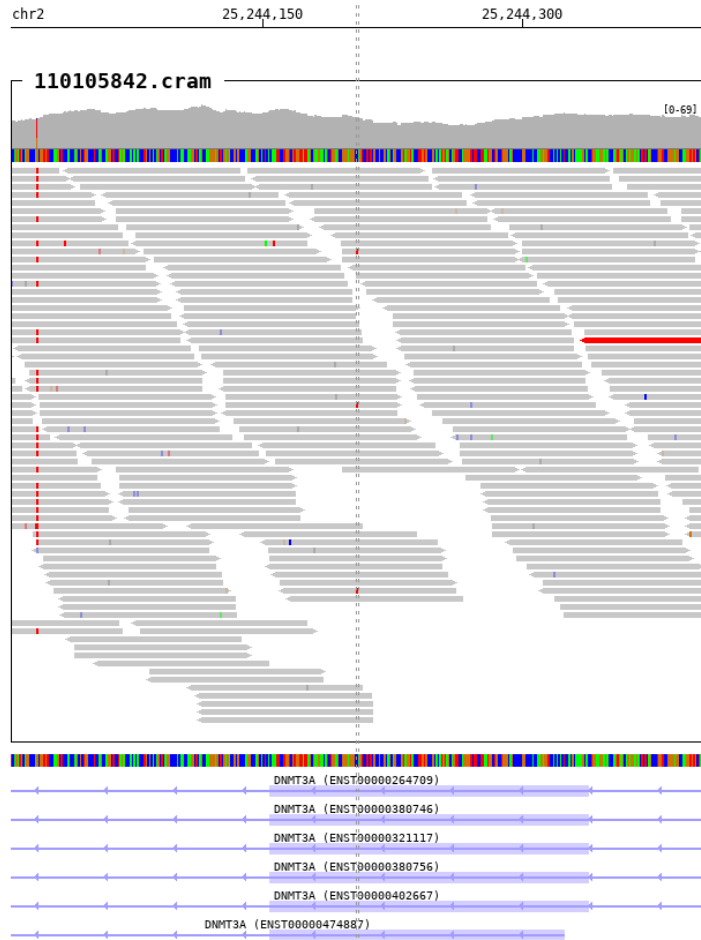

10.92. chr2\_25244214\_G/A

| SampleID  | Variants (GRCh38) | Ref_depth | Alt_depth | Gene          | Consequence |
|-----------|-------------------|-----------|-----------|---------------|-------------|
| 101601325 | chr2_25244214_G/A | 33        | 6         | <i>DNMT3A</i> | stop_gained |
| 101605284 | chr2_25244214_G/A | 21        | 4         | <i>DNMT3A</i> | stop_gained |

chr2 25,244,150 25,244,300

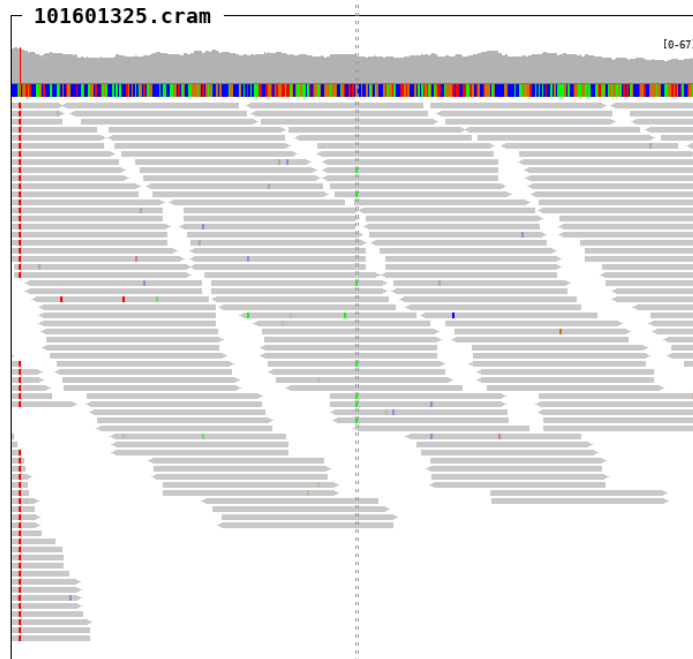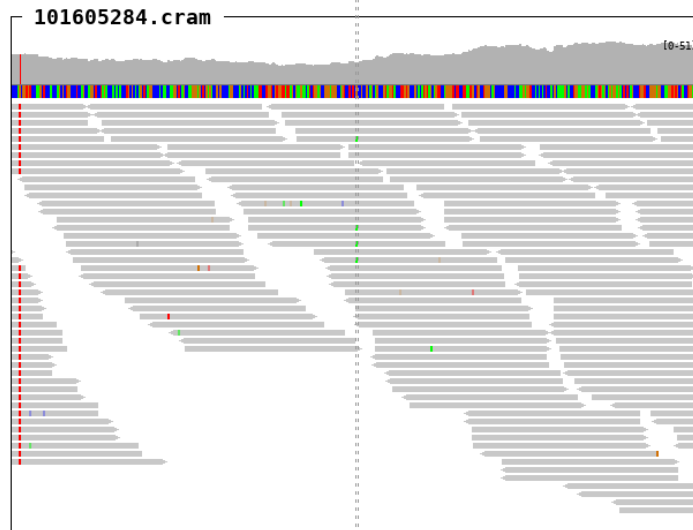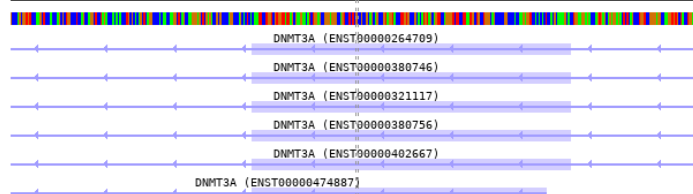

10.93. chr2\_25244230\_G/C

| SampleID | Variants (GRCh38) | Ref_depth | Alt_depth | Gene   | Consequence |
|----------|-------------------|-----------|-----------|--------|-------------|
| 60636    | chr2_25244230_G/C | 35        | 4         | DNMT3A | stop_gained |

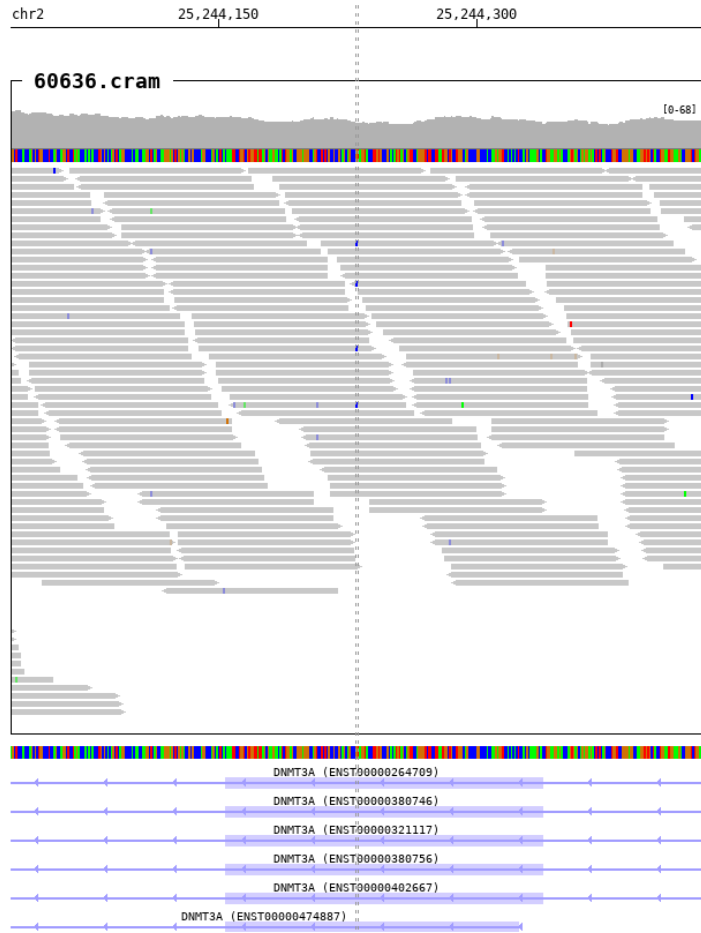

10.94. chr2\_25244263\_C/G

| SampleID  | Variants (GRCh38) | Ref_depth | Alt_depth | Gene   | Consequence      |
|-----------|-------------------|-----------|-----------|--------|------------------|
| 112303684 | chr2_25244263_C/G | 38        | 7         | DNMT3A | missense_variant |

chr2 25,244,150 25,244,300 25,244,4

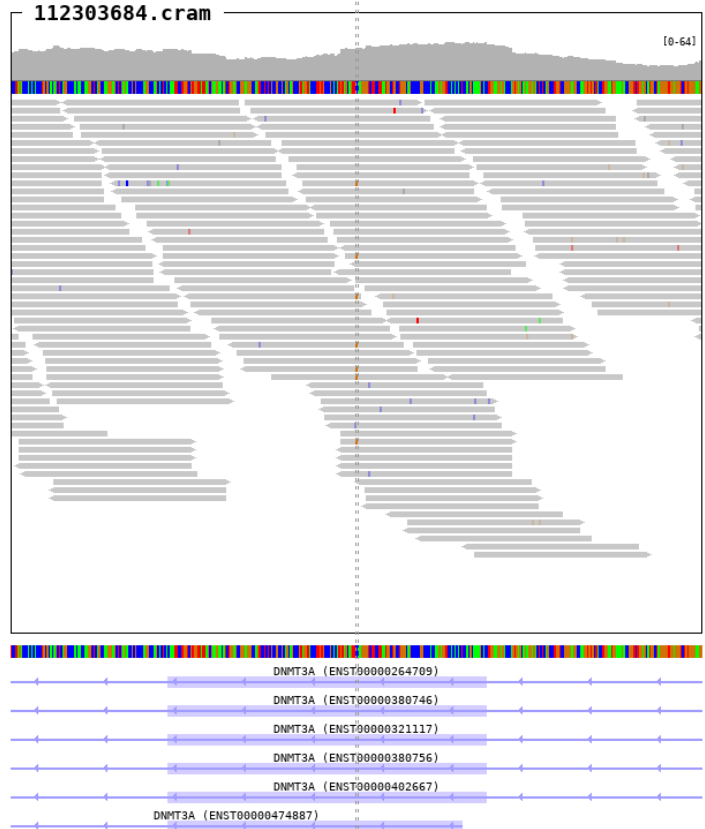

10.95. chr2\_25244265\_A/C

| SampleID | Variants (GRCh38) | Ref_depth | Alt_depth | Gene   | Consequence      |
|----------|-------------------|-----------|-----------|--------|------------------|
| 10310533 | chr2_25244265_A/C | 33        | 6         | DNMT3A | missense_variant |

chr2 25,244,150 25,244,300 25,244,450

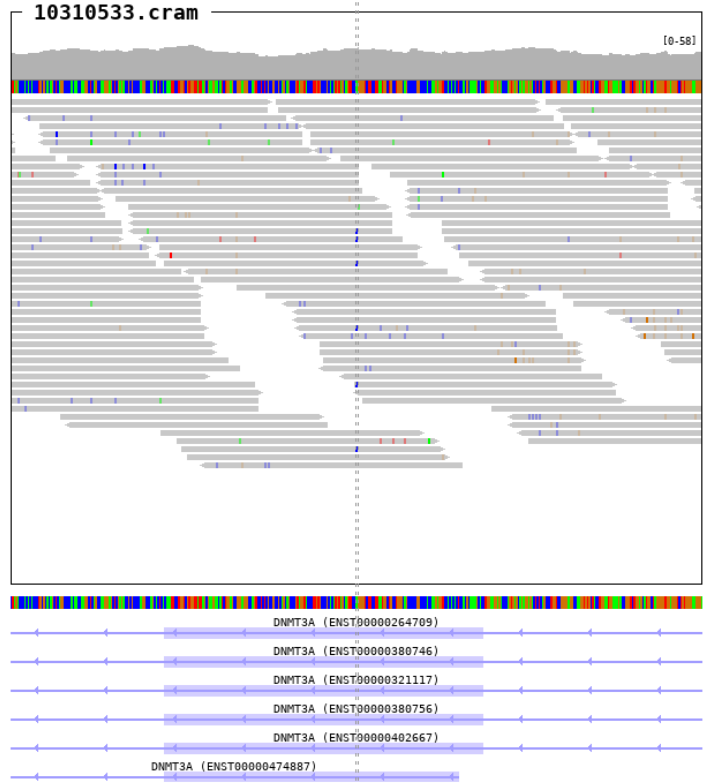

10.96. chr2\_25244265\_A/T

| SampleID  | Variants (GRCh38) | Ref_depth | Alt_depth | Gene   | Consequence      |
|-----------|-------------------|-----------|-----------|--------|------------------|
| 110104303 | chr2_25244265_A/T | 42        | 3         | DNMT3A | missense_variant |

chr2 25,244,150 25,244,300 25,244,450

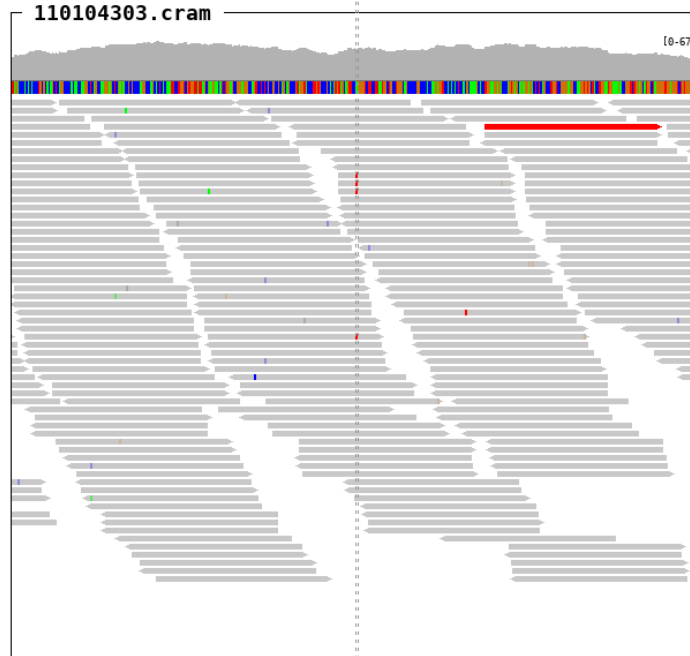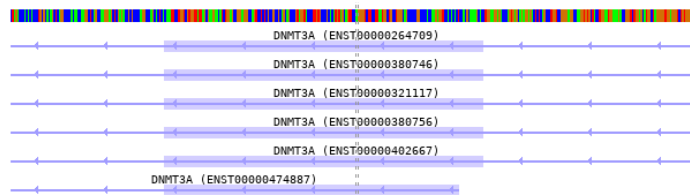

10.97. chr2\_25244285\_CCTGGGCAGCC/-

| SampleID  | Variants (GRCh38)           | Ref_depth | Alt_depth | Gene   | Consequence        |
|-----------|-----------------------------|-----------|-----------|--------|--------------------|
| 101608405 | chr2_25244285_CCTGGGCAGCC/- | 27        | 3         | DNMT3A | frameshift_variant |

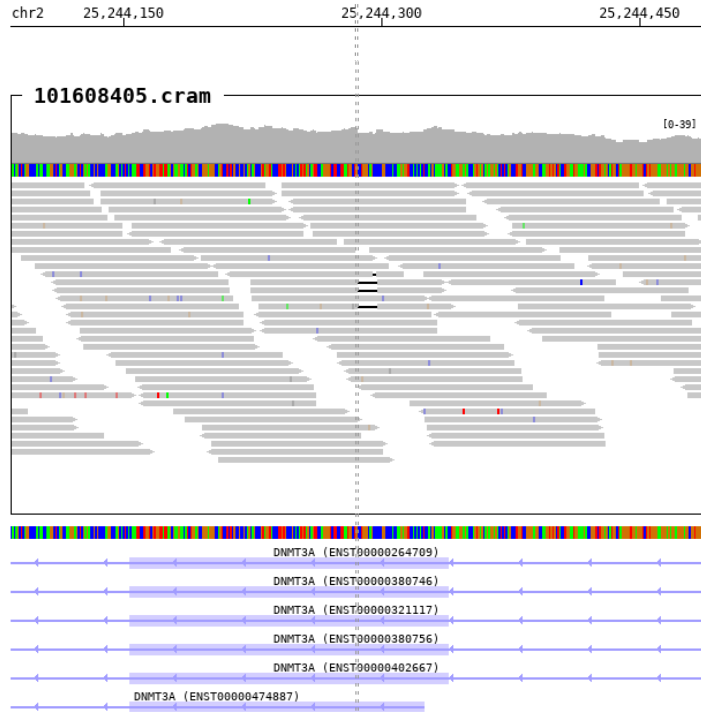

10.98. chr2\_25244285\_C/-

| SampleID  | Variants (GRCh38) | Ref_depth | Alt_depth | Gene   | Consequence        |
|-----------|-------------------|-----------|-----------|--------|--------------------|
| 112300735 | chr2_25244285_C/- | 44        | 5         | DNMT3A | frameshift_variant |

chr2 25,244,150 25,244,300 25,244,450

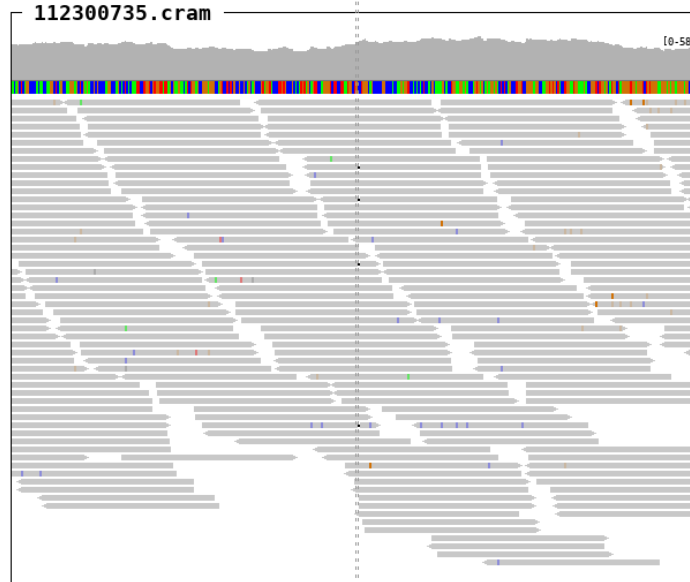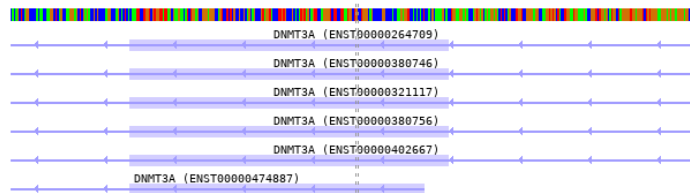

10.99. chr2\_25244316\_CA/-

| SampleID  | Variants (GRCh38)  | Ref_depth | Alt_depth | Gene          | Consequence        |
|-----------|--------------------|-----------|-----------|---------------|--------------------|
| 110106181 | chr2_25244316_CA/- | 25        | 6         | <i>DNMT3A</i> | frameshift_variant |

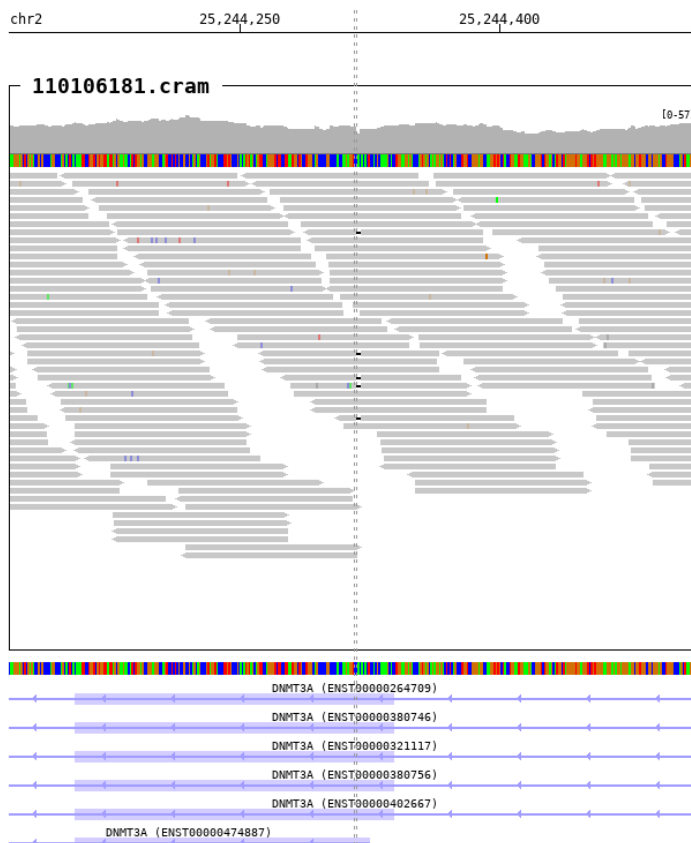

10.100. chr2\_25244559\_C/T

| SampleID | Variants (GRCh38) | Ref_depth | Alt_depth | Gene   | Consequence      |
|----------|-------------------|-----------|-----------|--------|------------------|
| 11110223 | chr2_25244559_C/T | 21        | 3         | DNMT3A | missense_variant |

chr2 25,244,450 25,244,600 25,244,

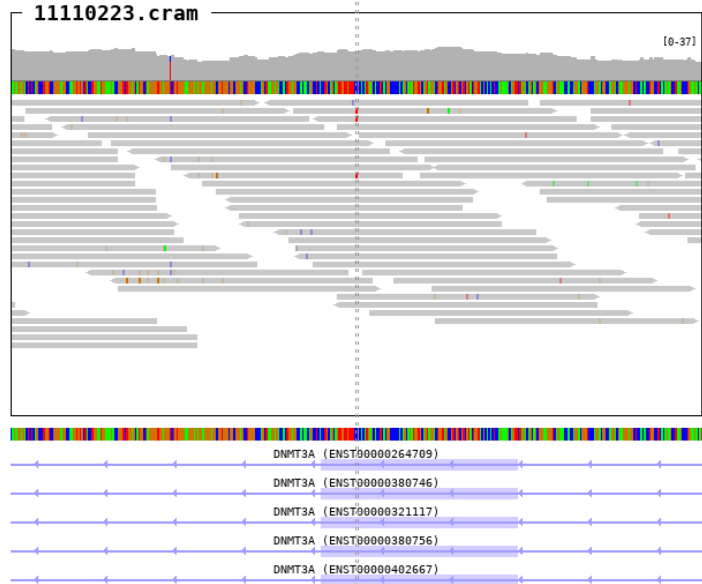

10.101. chr2\_25244567\_A/G

| SampleID  | Variants (GRCh38) | Ref_depth | Alt_depth | Gene   | Consequence      |
|-----------|-------------------|-----------|-----------|--------|------------------|
| 110105646 | chr2_25244567_A/G | 28        | 3         | DNMT3A | missense_variant |

chr2 25,244,450 25,244,600 25,244,750

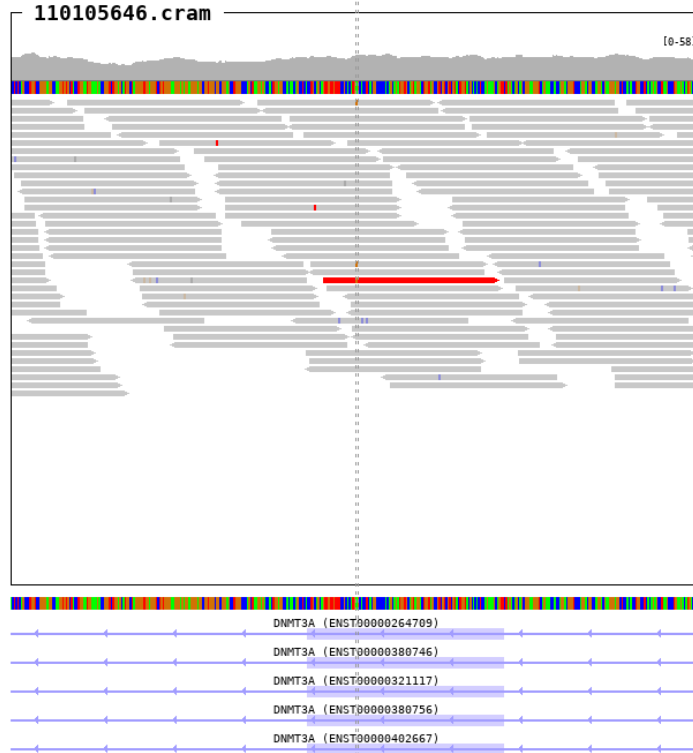

10.102. chr2\_25244580\_C/A

| SampleID  | Variants (GRCh38) | Ref_depth | Alt_depth | Gene   | Consequence      |
|-----------|-------------------|-----------|-----------|--------|------------------|
| 112404978 | chr2_25244580_C/A | 30        | 5         | DNMT3A | missense_variant |

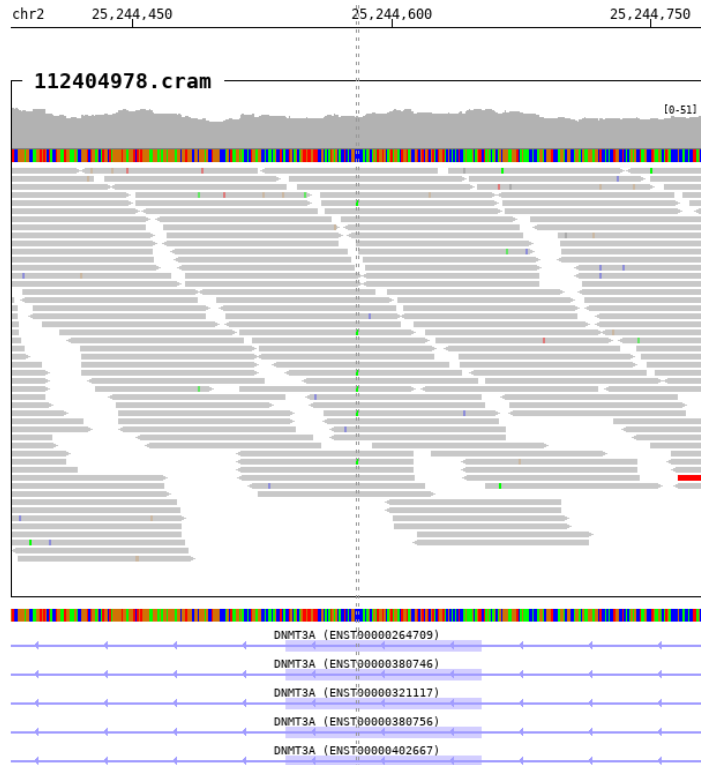

10.103. chr2\_25244633\_CA/-

| SampleID  | Variants (GRCh38)  | Ref_depth | Alt_depth | Gene   | Consequence        |
|-----------|--------------------|-----------|-----------|--------|--------------------|
| 100601629 | chr2_25244633_CA/- | 39        | 10        | DNMT3A | frameshift_variant |

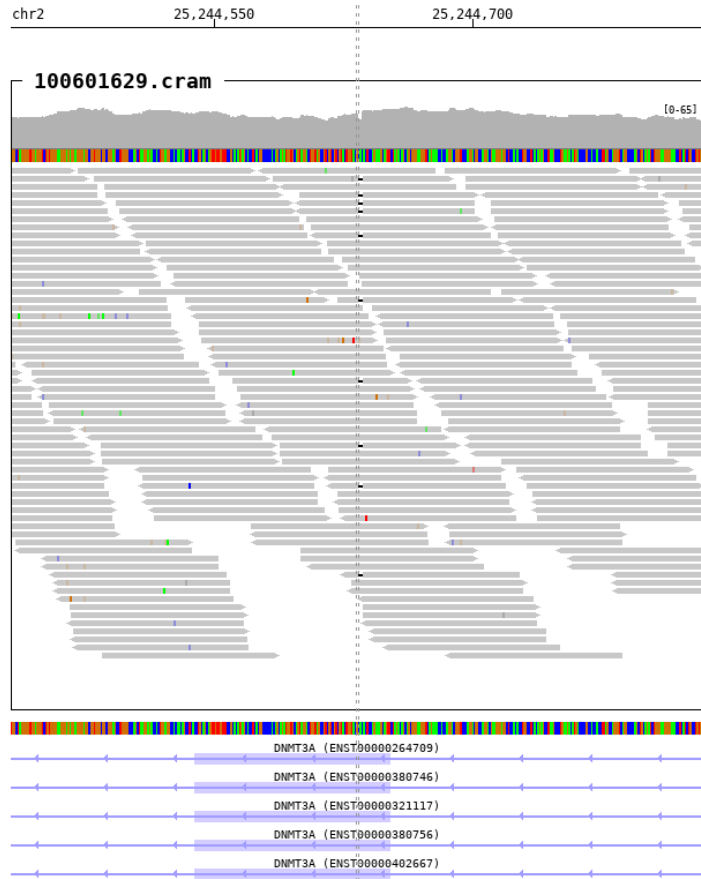

10.104. chr2\_25244640\_C/A

| SampleID  | Variants (GRCh38) | Ref_depth | Alt_depth | Gene   | Consequence |
|-----------|-------------------|-----------|-----------|--------|-------------|
| 110108599 | chr2_25244640_C/A | 42        | 4         | DNMT3A | stop_gained |

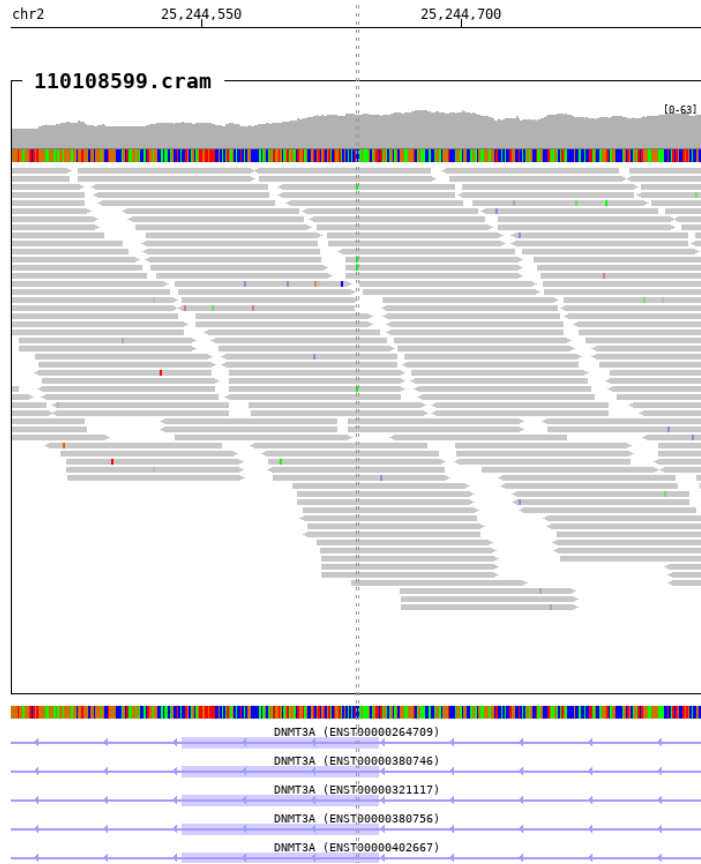

10.105. chr2\_25244654\_T/C

| SampleID  | Variants (GRCh38) | Ref_depth | Alt_depth | Gene   | Consequence             |
|-----------|-------------------|-----------|-----------|--------|-------------------------|
| 100600807 | chr2_25244654_T/C | 33        | 3         | DNMT3A | splice_acceptor_variant |

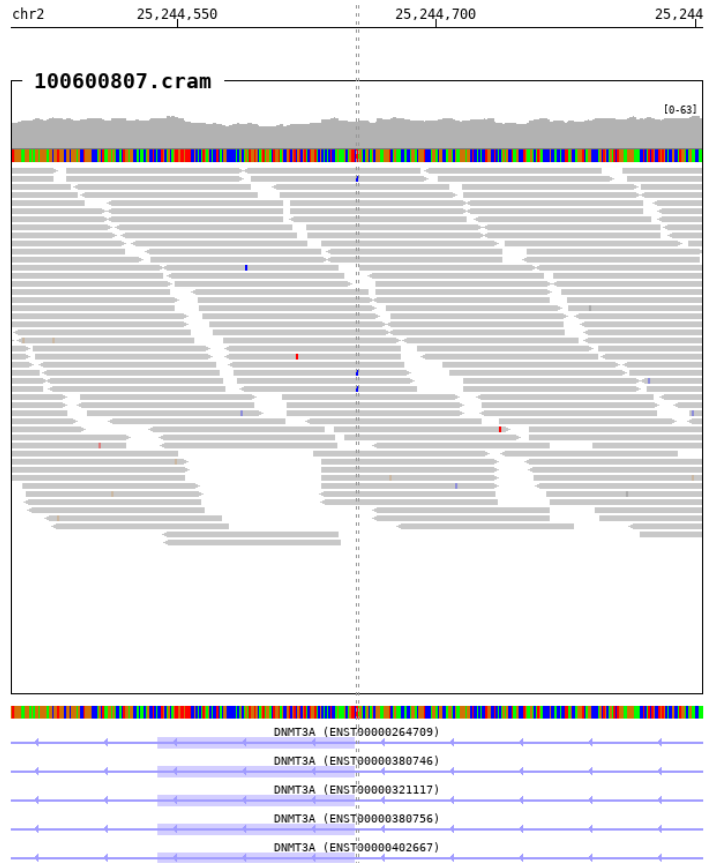

10.106. chr2\_25245264\_G/A

| SampleID | Variants (GRCh38) | Ref_depth | Alt_depth | Gene   | Consequence |
|----------|-------------------|-----------|-----------|--------|-------------|
| 10010289 | chr2_25245264_G/A | 32        | 4         | DNMT3A | stop_gained |

chr2 25,245,150 25,245,300 25,245,4

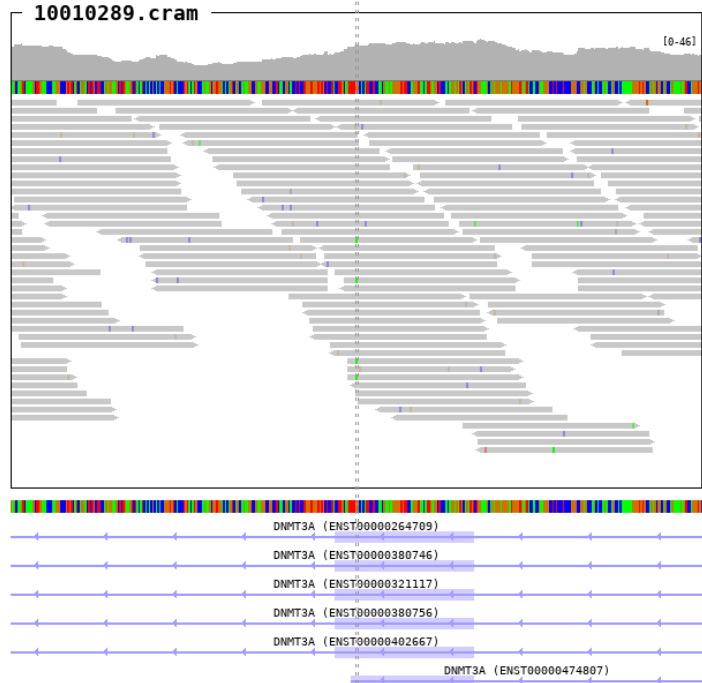

10.107. chr2\_25245266\_A/-

| SampleID | Variants (GRCh38) | Ref_depth | Alt_depth | Gene   | Consequence        |
|----------|-------------------|-----------|-----------|--------|--------------------|
| 64328    | chr2_25245266_A/- | 48        | 4         | DNMT3A | frameshift_variant |

chr2 25,245,150 25,245,300 25,245,450

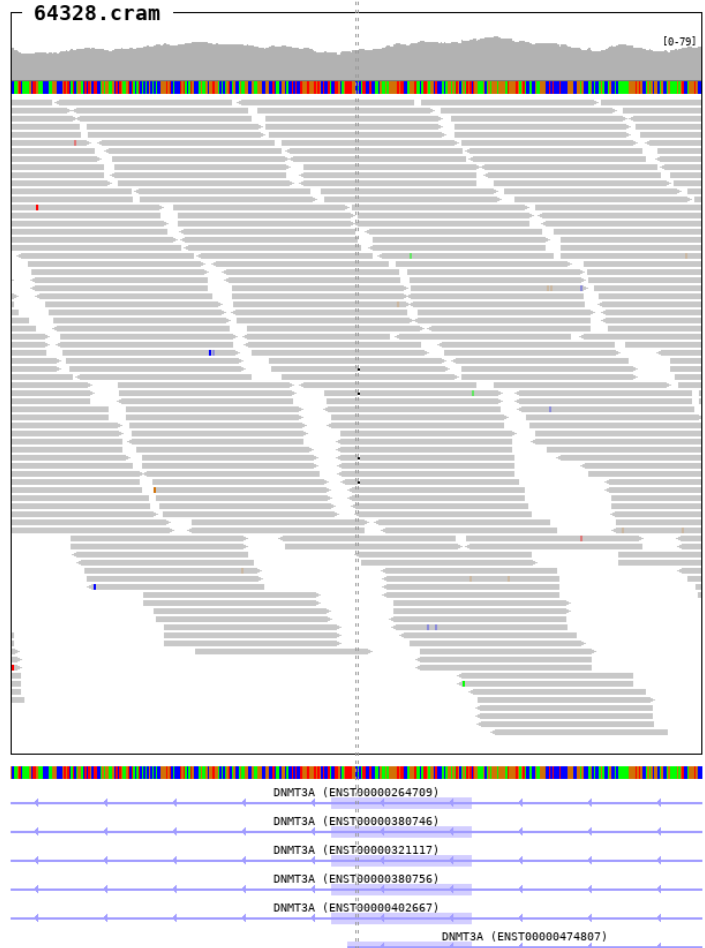

10.108. chr2\_25245295\_A/-

| SampleID  | Variants (GRCh38) | Ref_depth | Alt_depth | Gene          | Consequence        |
|-----------|-------------------|-----------|-----------|---------------|--------------------|
| 102102730 | chr2_25245295_A/- | 33        | 4         | <i>DNMT3A</i> | frameshift_variant |

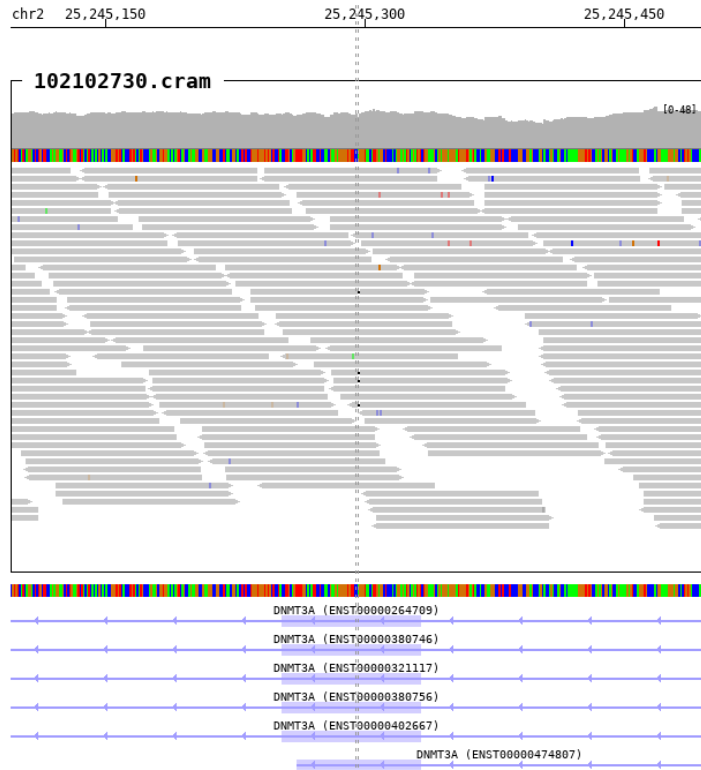

10.109. chr2\_25246160\_C/A

| SampleID   | Variants (GRCh38) | Ref_depth | Alt_depth | Gene          | Consequence |
|------------|-------------------|-----------|-----------|---------------|-------------|
| 5104113248 | chr2_25246160_C/A | 38        | 4         | <i>DNMT3A</i> | stop_gained |
| 60671      | chr2_25246160_C/A | 38        | 6         | <i>DNMT3A</i> | stop_gained |

chr2 25,246,050 25,246,200 25,246,200

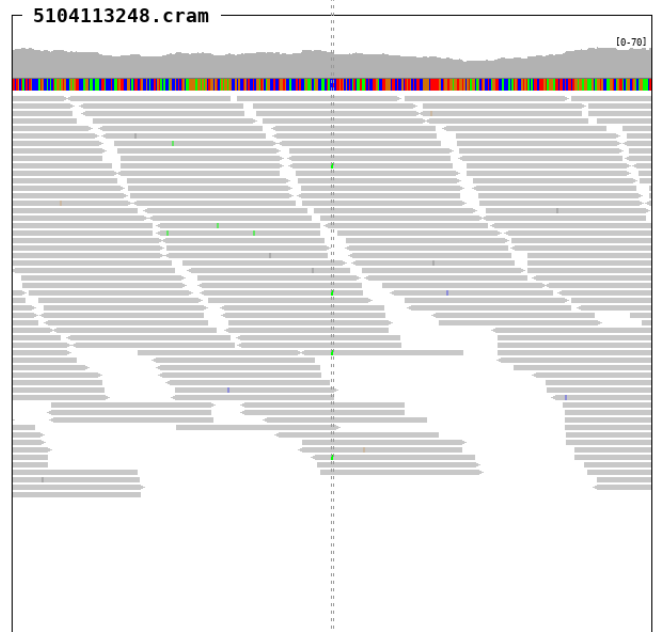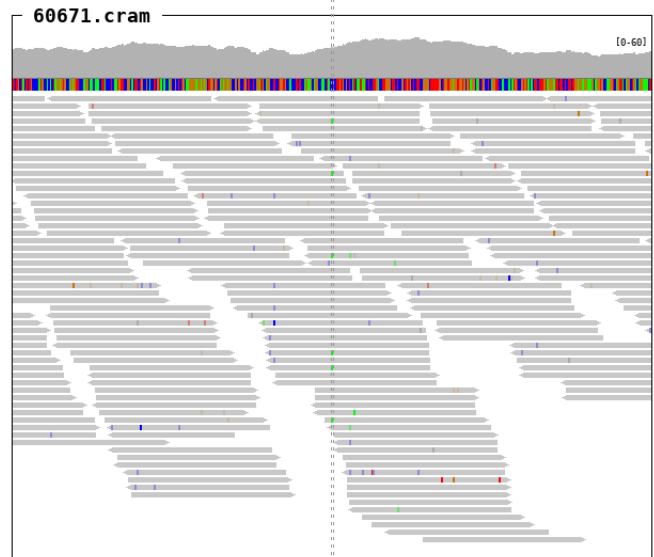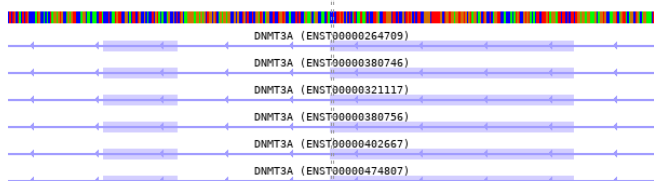

10.110. chr2\_25246184\_C/A

| SampleID  | Variants (GRCh38) | Ref_depth | Alt_depth | Gene          | Consequence |
|-----------|-------------------|-----------|-----------|---------------|-------------|
| 101607011 | chr2_25246184_C/A | 33        | 3         | <i>DNMT3A</i> | stop_gained |

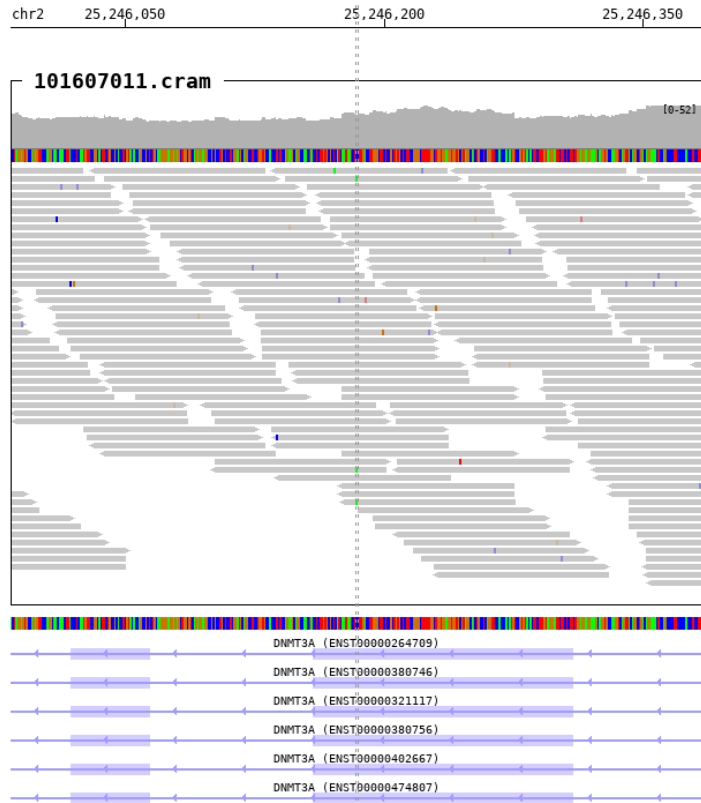

10.111. chr2\_25246245\_G/T

| SampleID  | Variants (GRCh38) | Ref_depth | Alt_depth | Gene          | Consequence |
|-----------|-------------------|-----------|-----------|---------------|-------------|
| 10510346  | chr2_25246245_G/T | 30        | 3         | <i>DNMT3A</i> | stop_gained |
| 110102247 | chr2_25246245_G/T | 44        | 4         | <i>DNMT3A</i> | stop_gained |

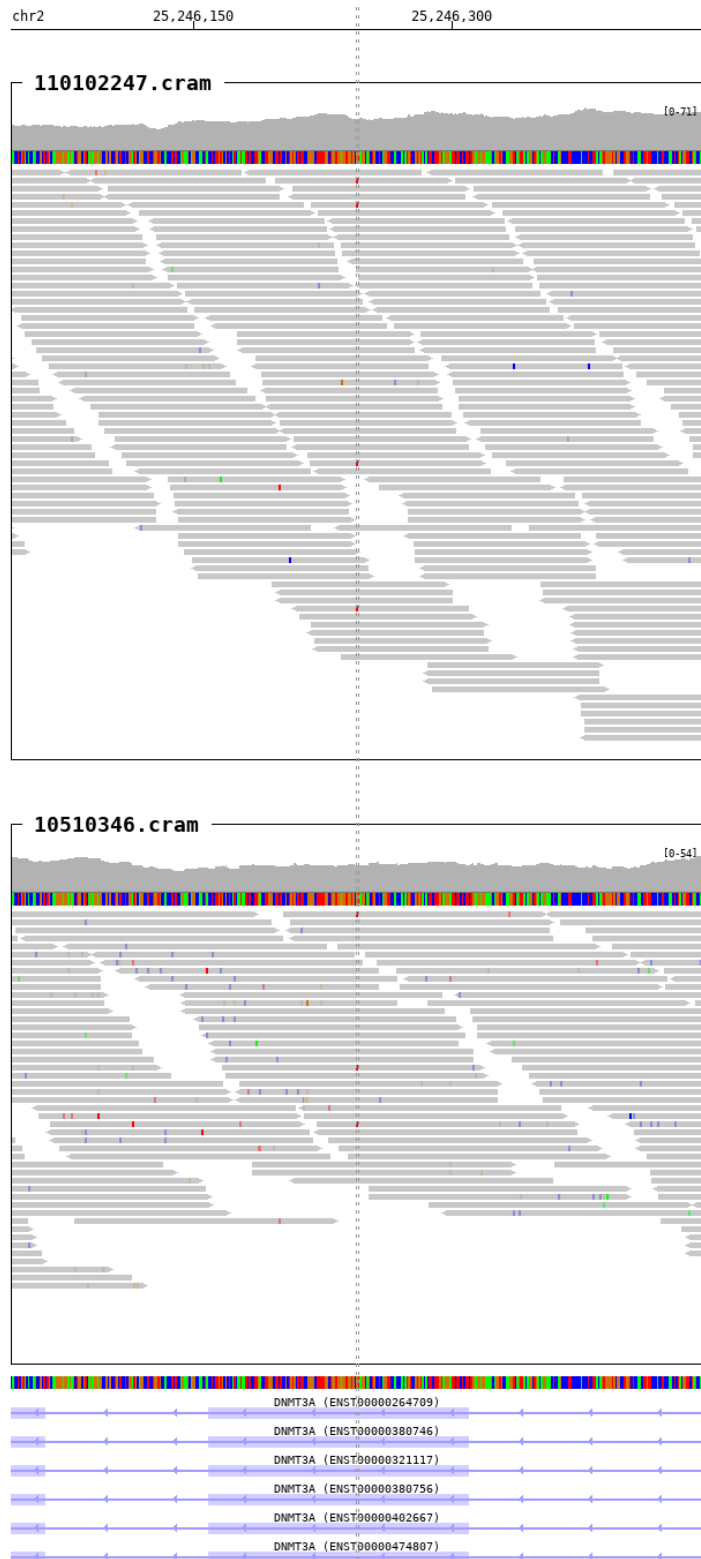

10.112. chr2\_25246293\_G/C

| SampleID | Variants (GRCh38) | Ref_depth | Alt_depth | Gene          | Consequence |
|----------|-------------------|-----------|-----------|---------------|-------------|
| 10310258 | chr2_25246293_G/C | 38        | 7         | <i>DNMT3A</i> | stop_gained |

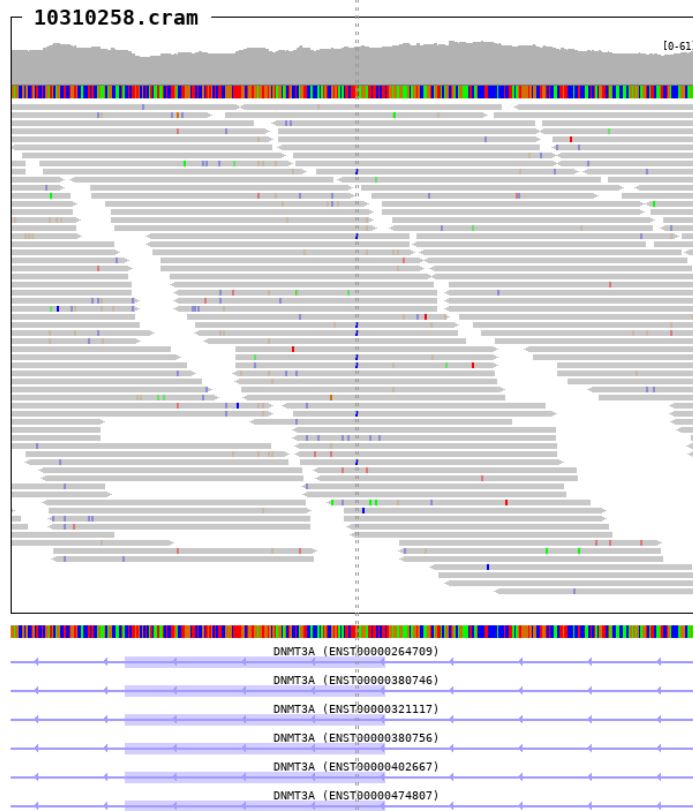

10.113. chr2\_25246293\_G/T

| SampleID | Variants (GRCh38) | Ref_depth | Alt_depth | Gene          | Consequence |
|----------|-------------------|-----------|-----------|---------------|-------------|
| 65134    | chr2_25246293_G/T | 92        | 4         | <i>DNMT3A</i> | stop_gained |

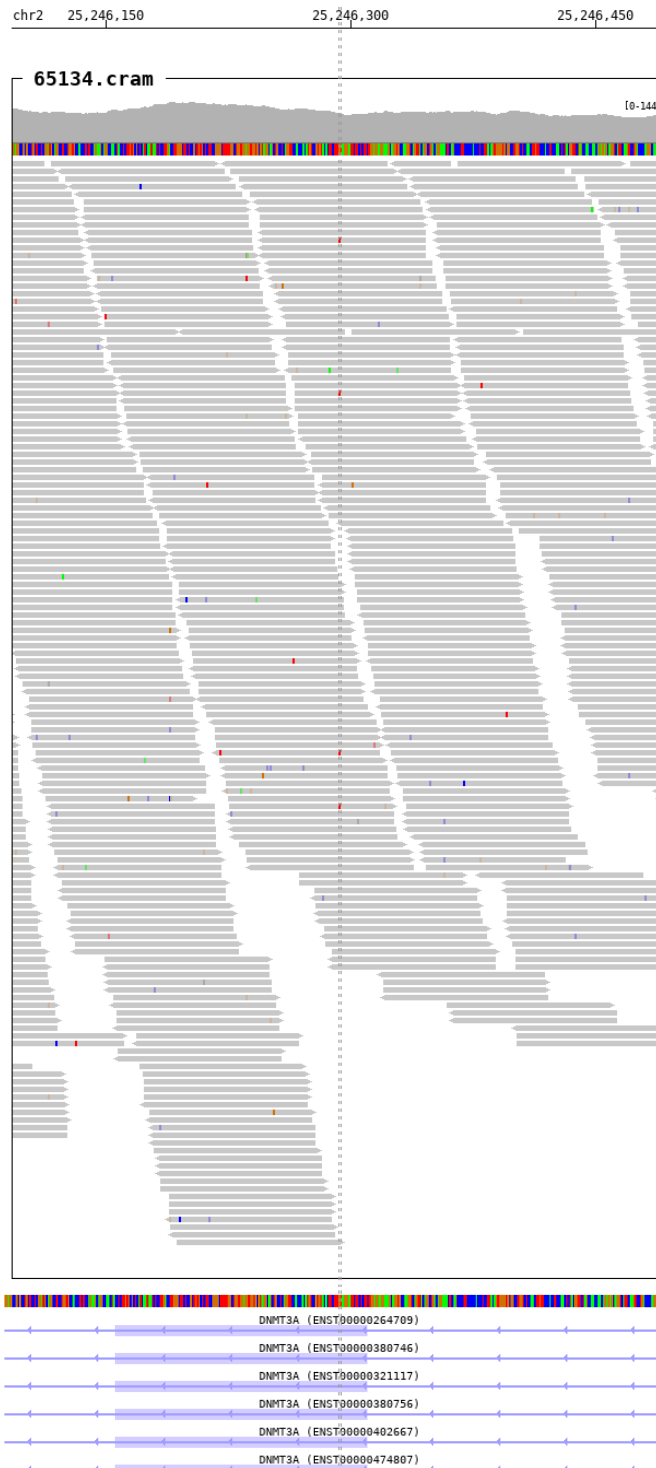

10.114. chr2\_25246618\_A/G

| SampleID  | Variants (GRCh38) | Ref_depth | Alt_depth | Gene   | Consequence          |
|-----------|-------------------|-----------|-----------|--------|----------------------|
| 101600932 | chr2_25246618_A/G | 59        | 5         | DNMT3A | splice_donor_variant |

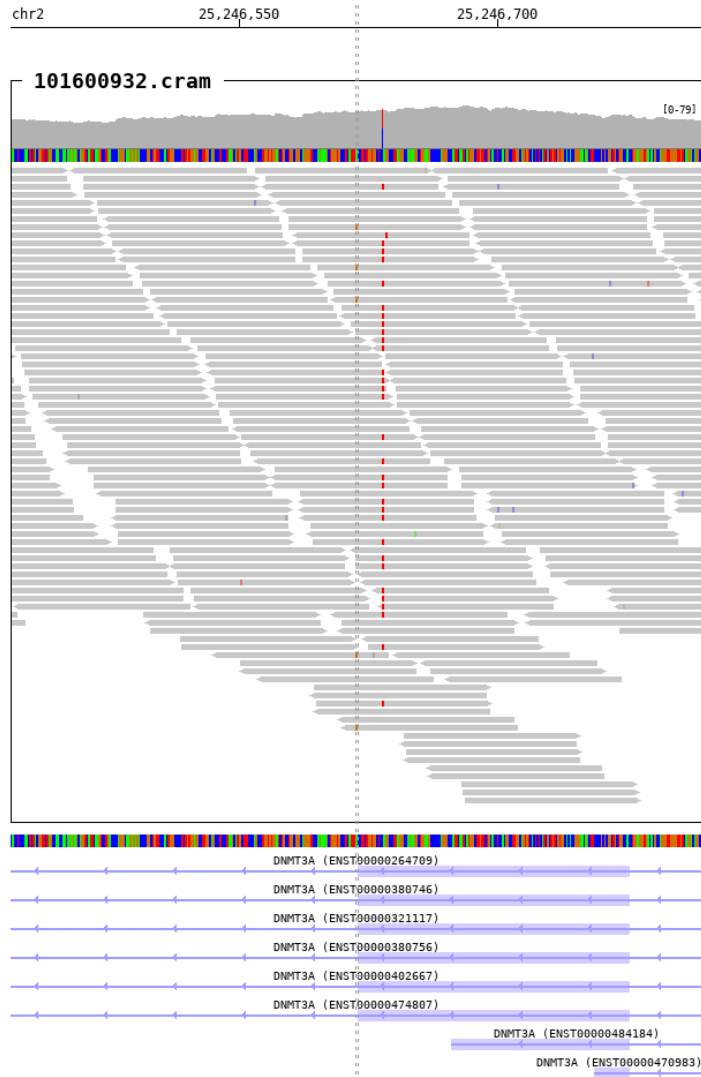

10.115. chr2\_25246619\_C/T

| SampleID  | Variants (GRCh38) | Ref_depth | Alt_depth | Gene          | Consequence          |
|-----------|-------------------|-----------|-----------|---------------|----------------------|
| 112406347 | chr2_25246619_C/T | 36        | 3         | <i>DNMT3A</i> | splice_donor_variant |

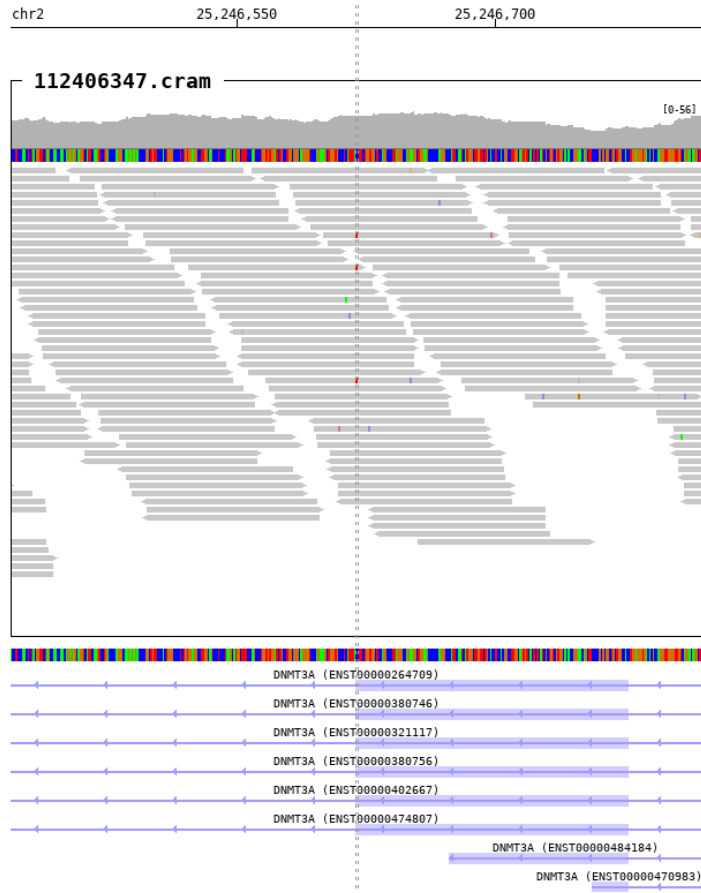

10.116. chr2\_25246632\_CC/AT

| SampleID  | Variants (GRCh38)   | Ref_depth | Alt_depth | Gene   | Consequence |
|-----------|---------------------|-----------|-----------|--------|-------------|
| 101602182 | chr2_25246632_CC/AT | 35        | 4         | DNMT3A | stop_gained |

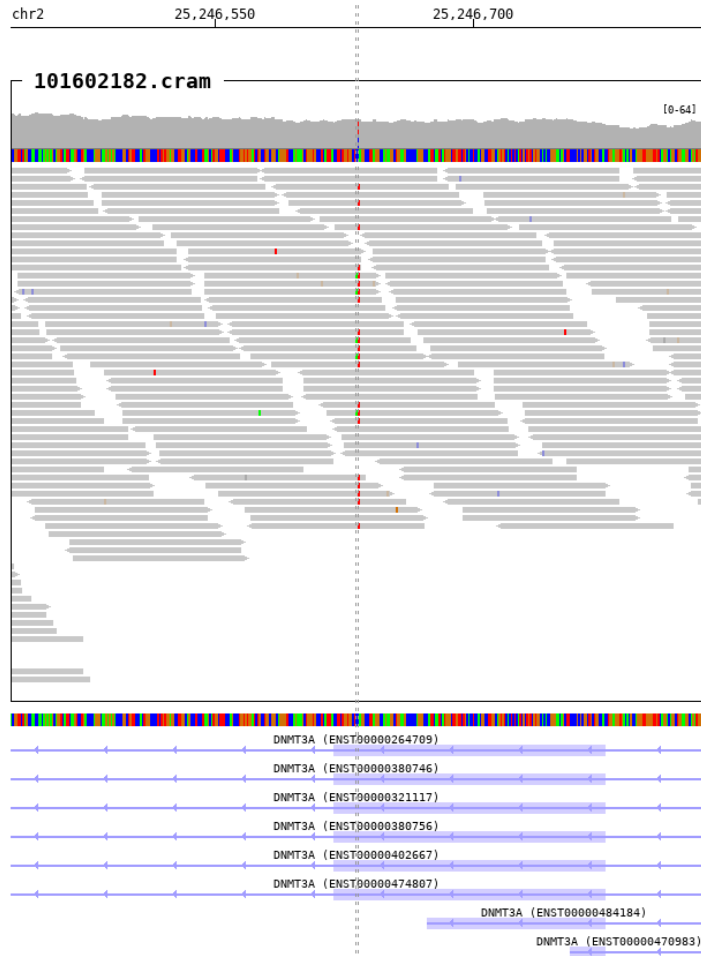

10.117. chr2\_25246656\_G/A

| SampleID  | Variants (GRCh38) | Ref_depth | Alt_depth | Gene   | Consequence |
|-----------|-------------------|-----------|-----------|--------|-------------|
| 110100829 | chr2_25246656_G/A | 20        | 3         | DNMT3A | stop_gained |

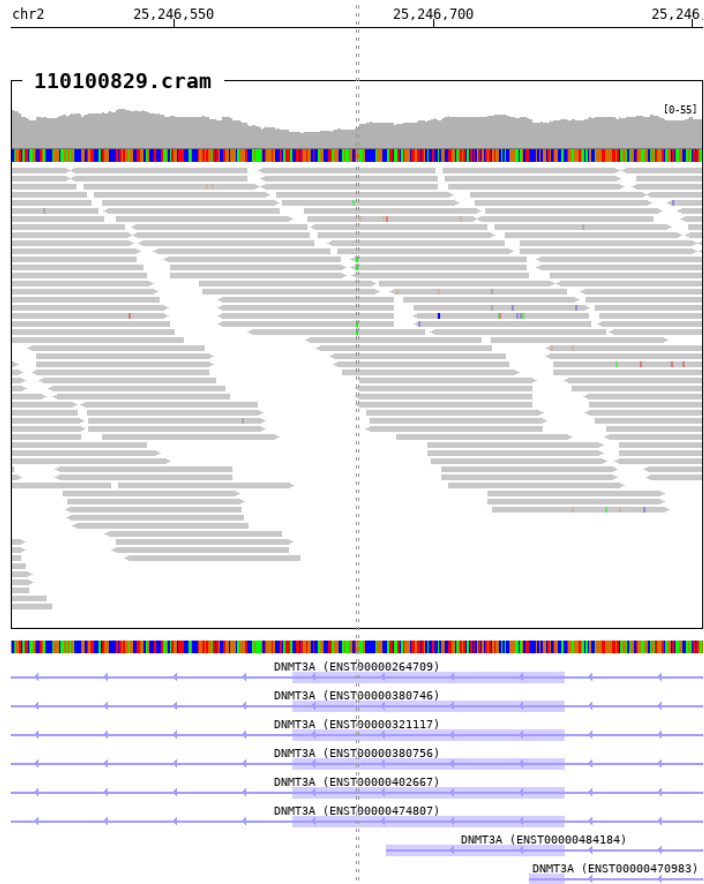

10.118. chr2\_25246673\_C/T

| SampleID  | Variants (GRCh38) | Ref_depth | Alt_depth | Gene          | Consequence |
|-----------|-------------------|-----------|-----------|---------------|-------------|
| 112400410 | chr2_25246673_C/T | 39        | 11        | <i>DNMT3A</i> | stop_gained |
| 60916     | chr2_25246673_C/T | 75        | 6         | <i>DNMT3A</i> | stop_gained |

chr2 25,246,550 25,246,700 25,246,850

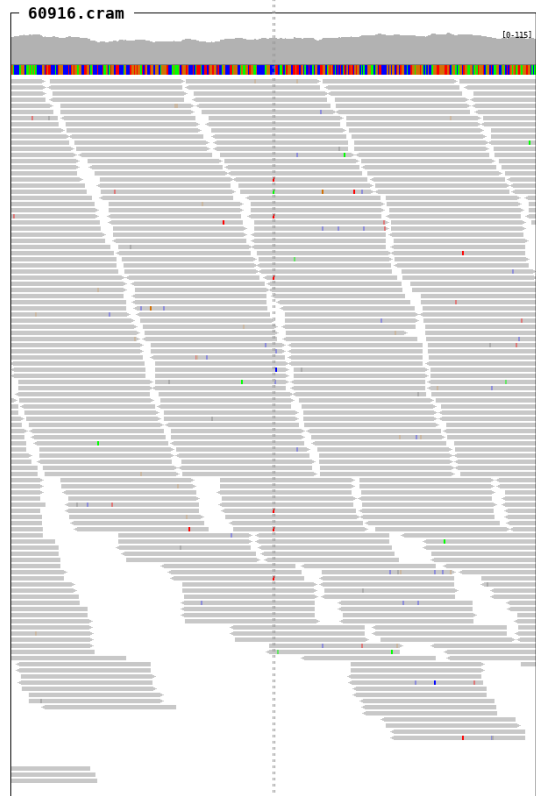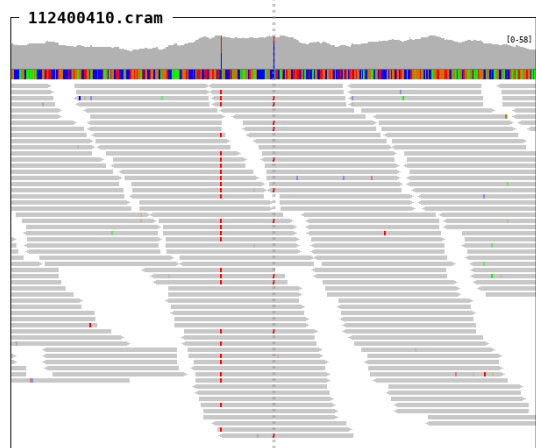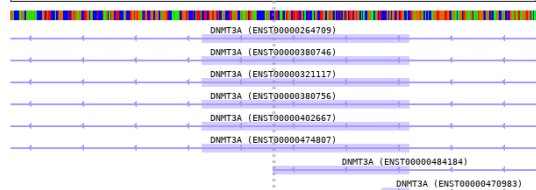

10.119. chr2\_25246744\_G/-

| SampleID  | Variants (GRCh38) | Ref_depth | Alt_depth | Gene   | Consequence        |
|-----------|-------------------|-----------|-----------|--------|--------------------|
| 100608130 | chr2_25246744_G/- | 35        | 7         | DNMT3A | frameshift_variant |

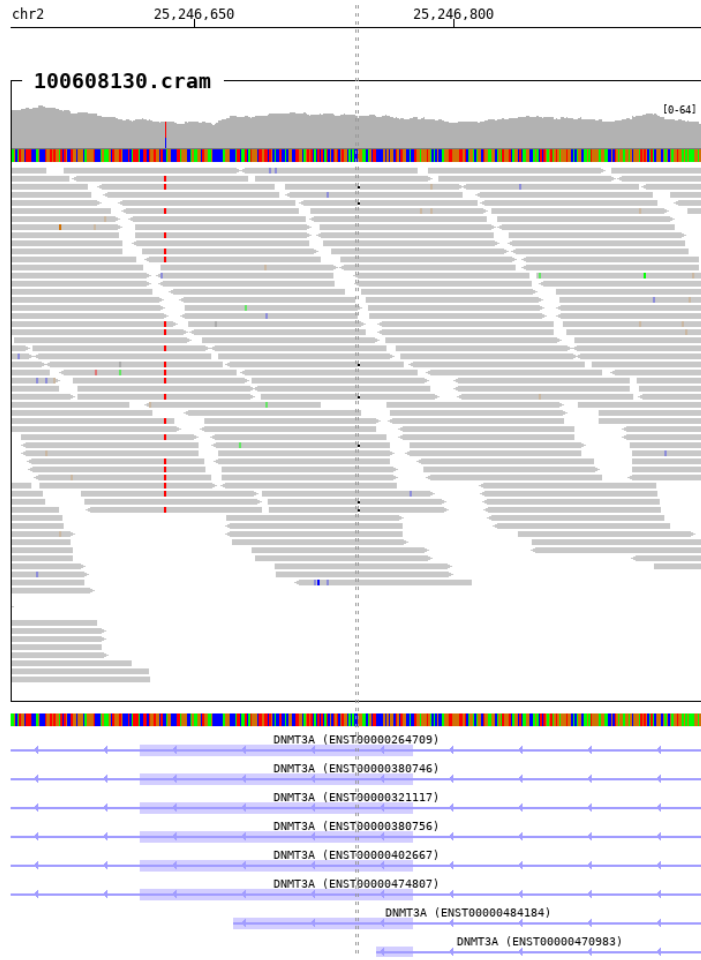

10.120. chr2\_25246764\_G/A

| SampleID  | Variants (GRCh38) | Ref_depth | Alt_depth | Gene   | Consequence      |
|-----------|-------------------|-----------|-----------|--------|------------------|
| 111104498 | chr2_25246764_G/A | 42        | 9         | DNMT3A | missense_variant |

chr2 25,246,650 25,246,800 25,246,9

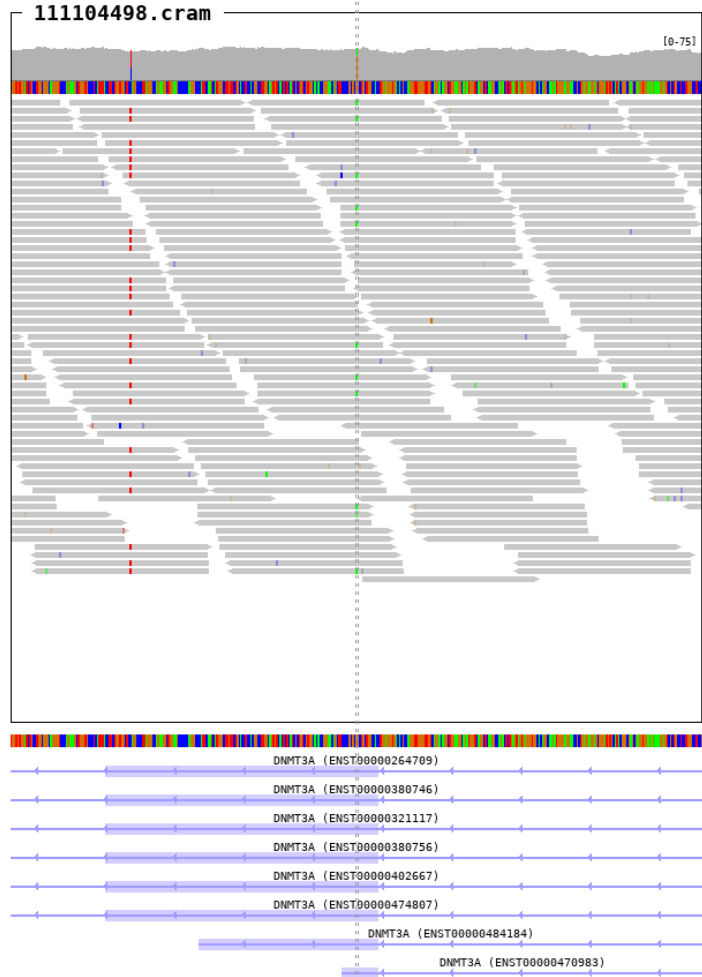

10.121. chr2\_25247063\_G/C

| SampleID  | Variants (GRCh38) | Ref_depth | Alt_depth | Gene   | Consequence |
|-----------|-------------------|-----------|-----------|--------|-------------|
| 112406443 | chr2_25247063_G/C | 31        | 10        | DNMT3A | stop_gained |

chr2 25,246,950 25,247,100 25,247,2

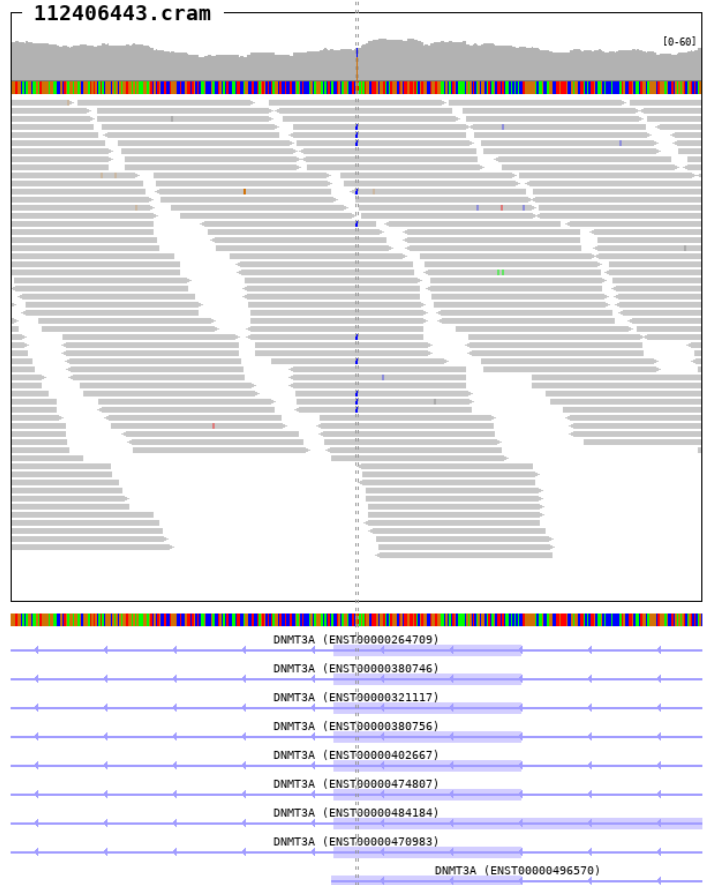

10.122. chr2\_25247070\_G/A

| SampleID  | Variants (GRCh38) | Ref_depth | Alt_depth | Gene   | Consequence      |
|-----------|-------------------|-----------|-----------|--------|------------------|
| 112302160 | chr2_25247070_G/A | 41        | 4         | DNMT3A | missense_variant |

chr2 25,246,950 25,247,100 25,247,250

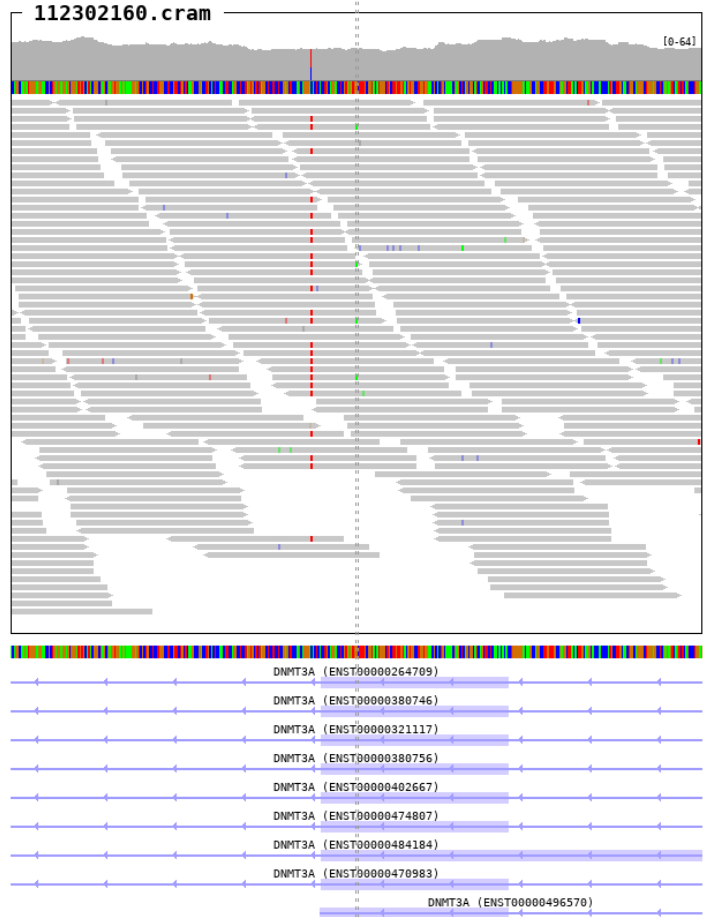

10.123. chr2\_25247076\_C/G

| SampleID  | Variants (GRCh38) | Ref_depth | Alt_depth | Gene   | Consequence      |
|-----------|-------------------|-----------|-----------|--------|------------------|
| 102106849 | chr2_25247076_C/G | 30        | 3         | DNMT3A | missense_variant |

chr2 25,246,950 25,247,100 25,247,250

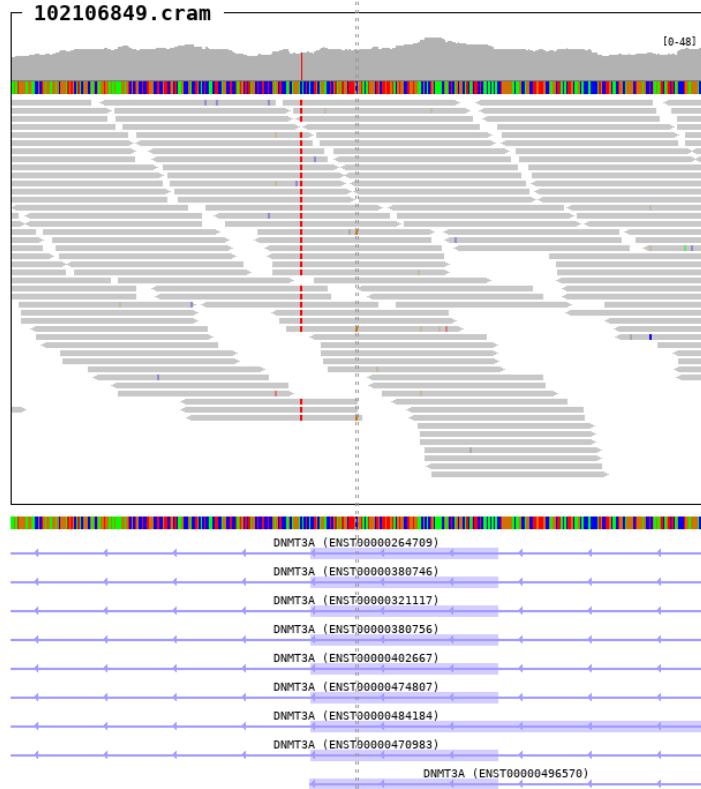

10.124. chr2\_25247078\_G/T

| SampleID   | Variants (GRCh38) | Ref_depth | Alt_depth | Gene   | Consequence |
|------------|-------------------|-----------|-----------|--------|-------------|
| 1308262201 | chr2_25247078_G/T | 23        | 3         | DNMT3A | stop_gained |

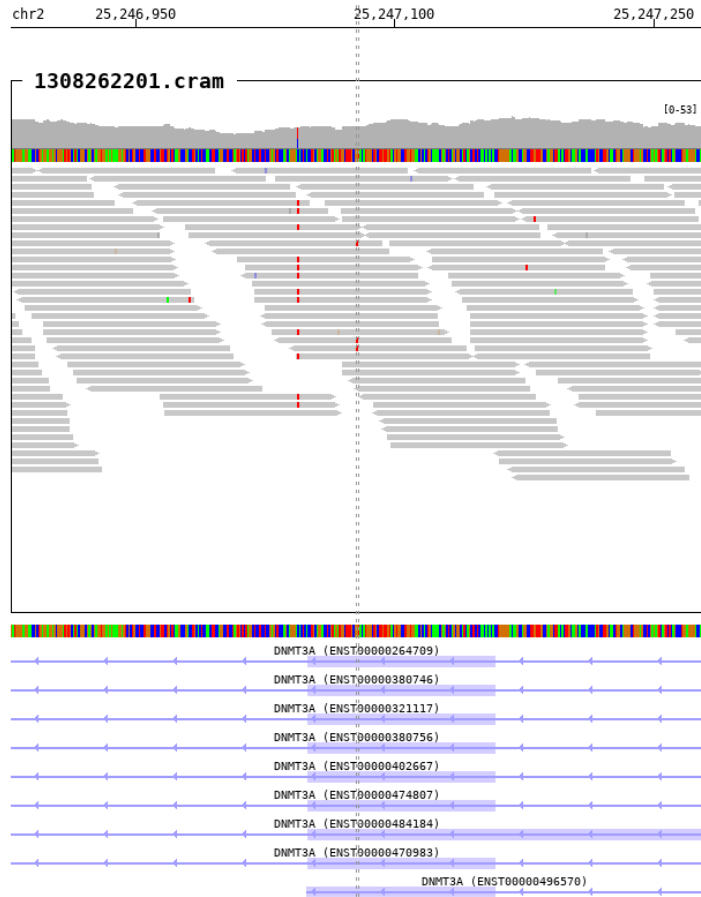

10.125. chr2\_25247121\_A/-

| SampleID | Variants (GRCh38) | Ref_depth | Alt_depth | Gene   | Consequence        |
|----------|-------------------|-----------|-----------|--------|--------------------|
| 11050848 | chr2_25247121_A/- | 44        | 8         | DNMT3A | frameshift_variant |

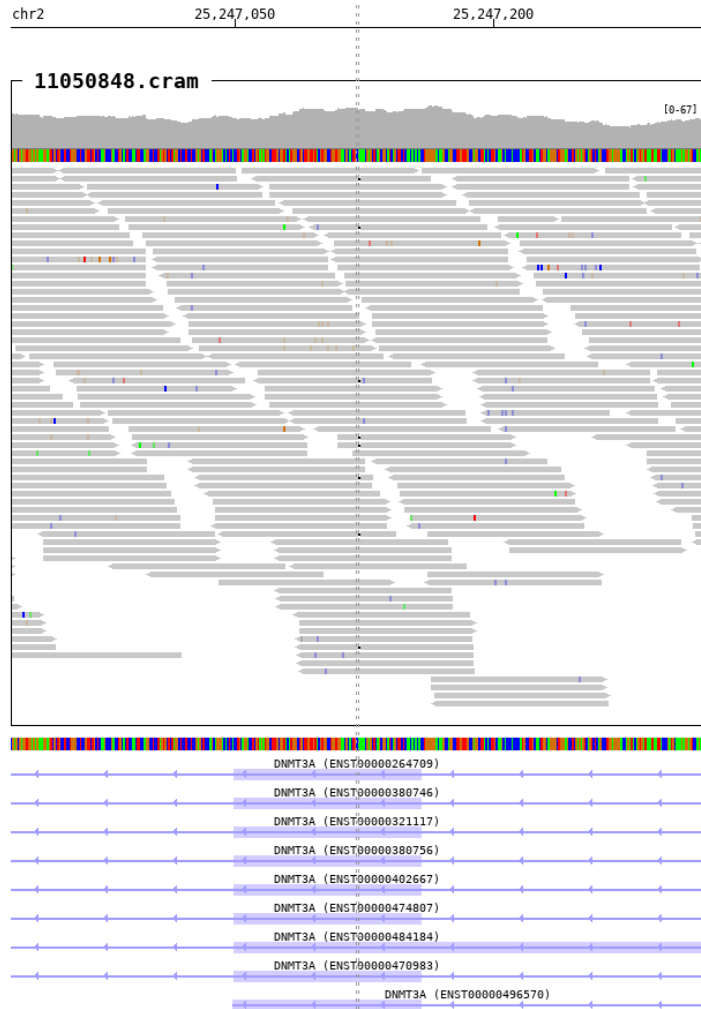

10.126. chr2\_25247150\_ACAC/-

| SampleID | Variants (GRCh38)    | Ref_depth | Alt_depth | Gene   | Consequence        |
|----------|----------------------|-----------|-----------|--------|--------------------|
| 64129    | chr2_25247150_ACAC/- | 65        | 6         | DNMT3A | frameshift_variant |

chr2 25,247,050 25,247,200 25,24

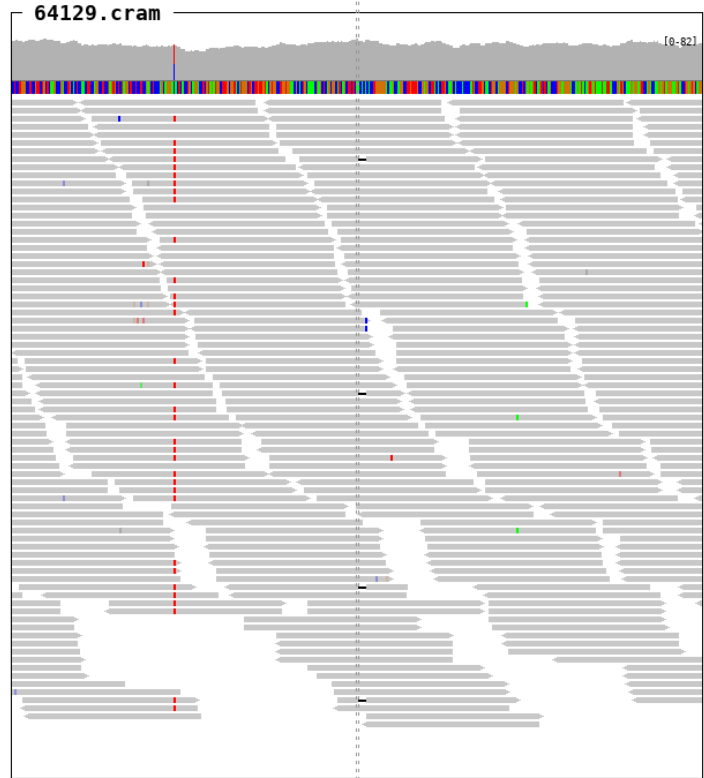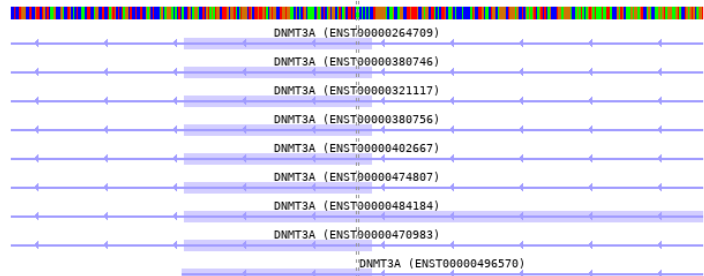

10.127. chr2\_25247602\_T/A

| SampleID | Variants (GRCh38) | Ref_depth | Alt_depth | Gene   | Consequence |
|----------|-------------------|-----------|-----------|--------|-------------|
| 60308    | chr2_25247602_T/A | 24        | 4         | DNMT3A | stop_gained |

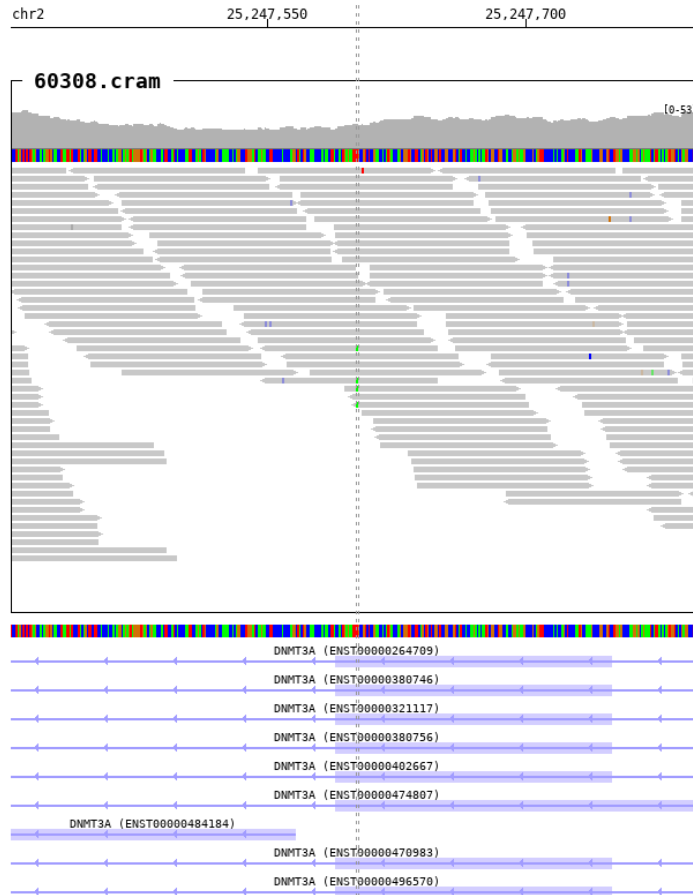

10.128. chr2\_25247625\_C/T

| SampleID | Variants (GRCh38) | Ref_depth | Alt_depth | Gene   | Consequence |
|----------|-------------------|-----------|-----------|--------|-------------|
| 68803    | chr2_25247625_C/T | 29        | 5         | DNMT3A | stop_gained |

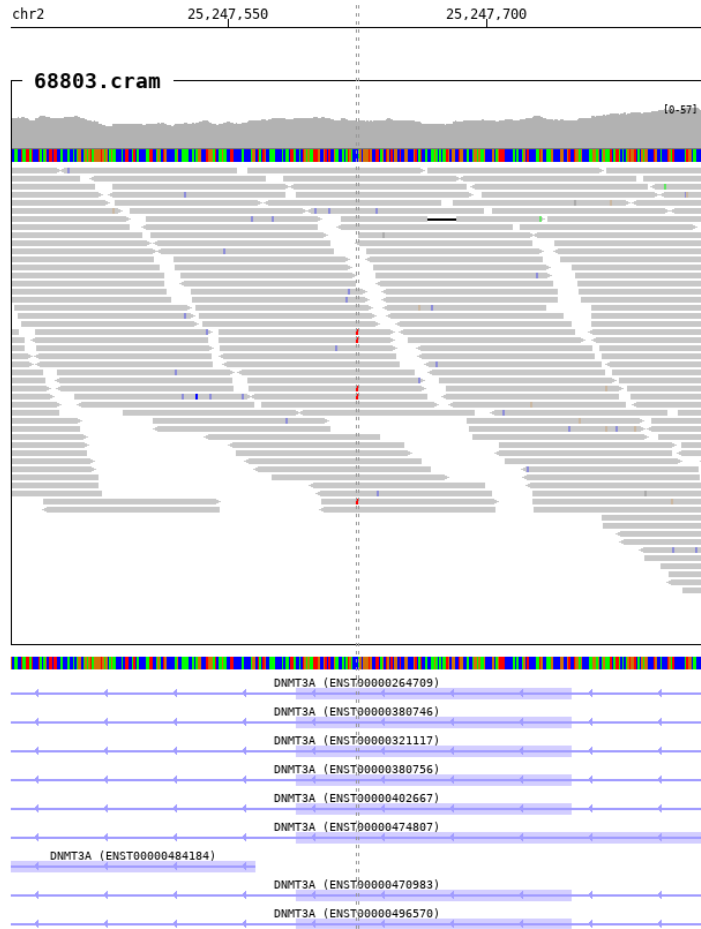

10.129. chr2\_25247628\_C/T

| SampleID  | Variants (GRCh38) | Ref_depth | Alt_depth | Gene          | Consequence      |
|-----------|-------------------|-----------|-----------|---------------|------------------|
| 100604488 | chr2_25247628_C/T | 23        | 6         | <i>DNMT3A</i> | missense_variant |
| 110105559 | chr2_25247628_C/T | 39        | 4         | <i>DNMT3A</i> | missense_variant |
| 112404674 | chr2_25247628_C/T | 34        | 6         | <i>DNMT3A</i> | missense_variant |

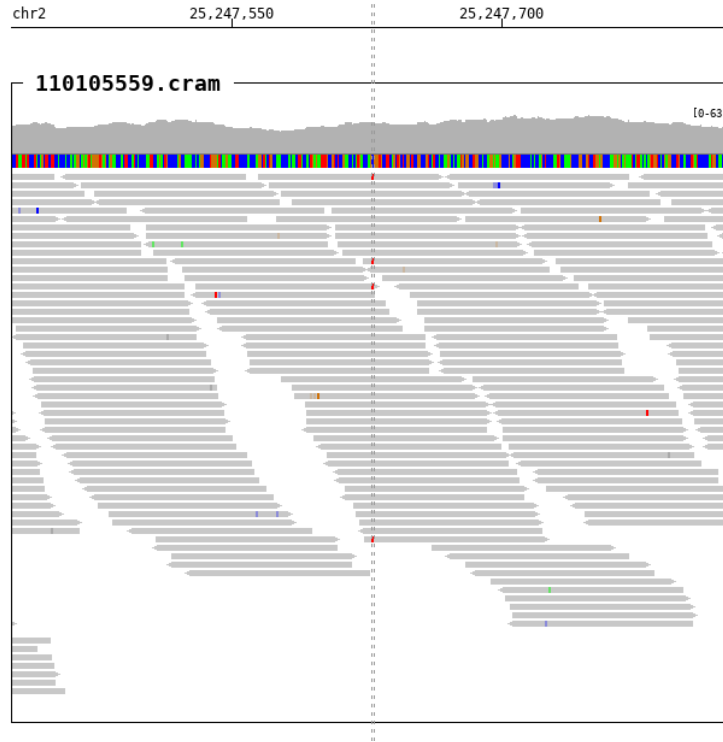

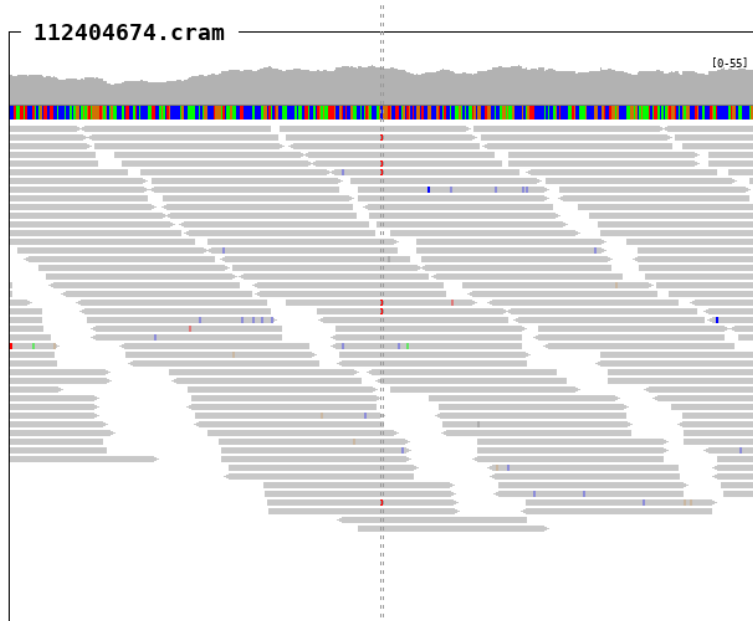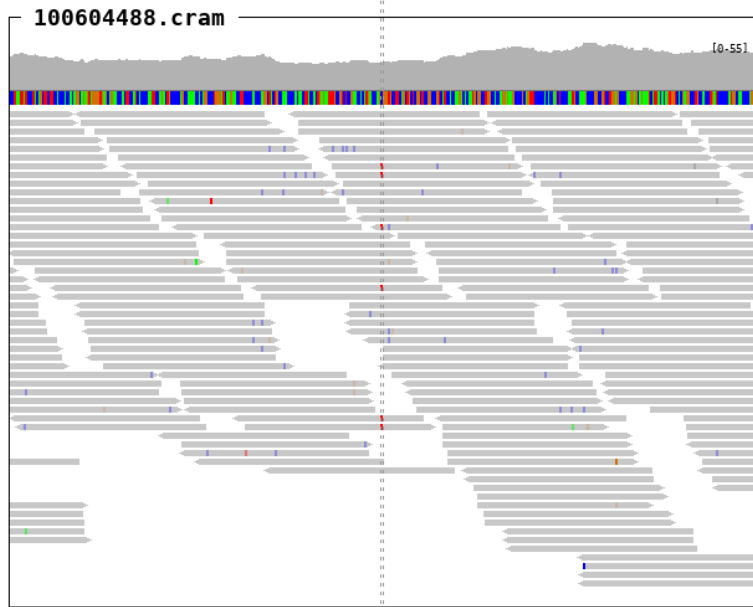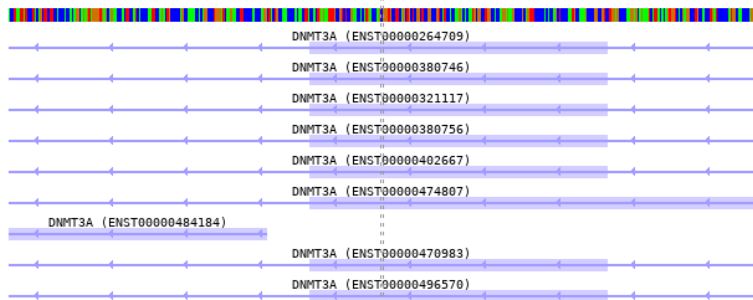

10.130. chr2\_25247628\_C/A

| SampleID | Variants (GRCh38) | Ref_depth | Alt_depth | Gene   | Consequence      |
|----------|-------------------|-----------|-----------|--------|------------------|
| 67310    | chr2_25247628_C/A | 36        | 4         | DNMT3A | missense_variant |

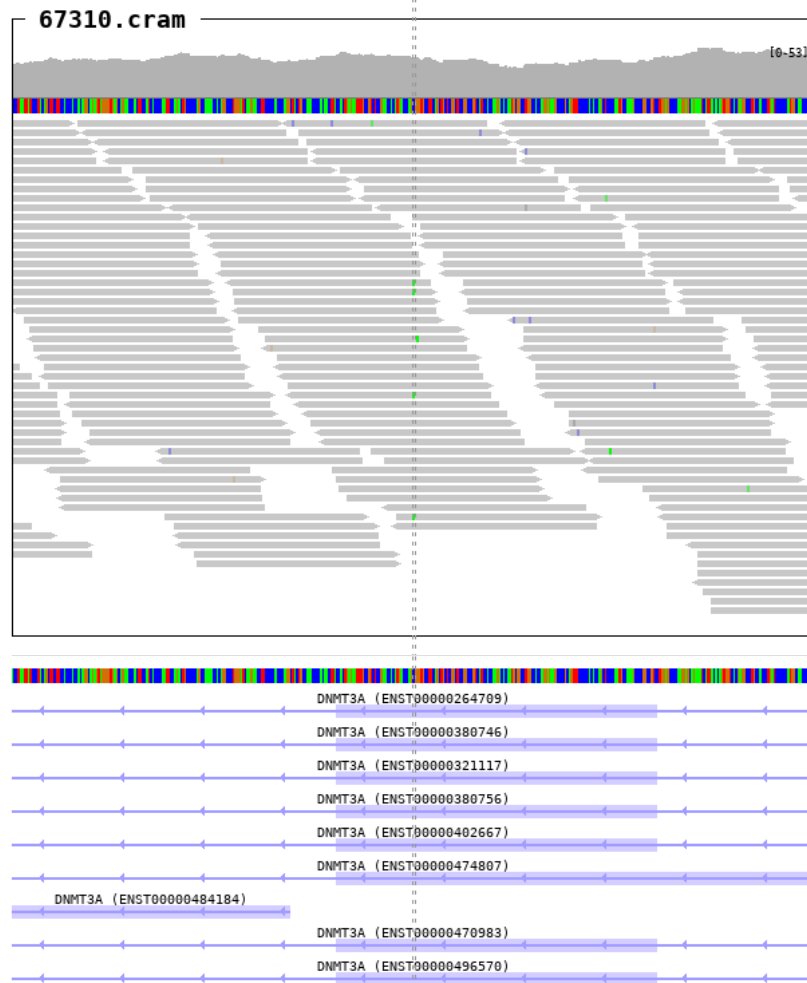

10.131. chr2\_25247629\_G/A

| SampleID  | Variants (GRCh38) | Ref_depth | Alt_depth | Gene          | Consequence      |
|-----------|-------------------|-----------|-----------|---------------|------------------|
| 112301593 | chr2_25247629_G/A | 31        | 7         | <i>DNMT3A</i> | missense_variant |
| 112303065 | chr2_25247629_G/A | 46        | 3         | <i>DNMT3A</i> | missense_variant |
| 112404255 | chr2_25247629_G/A | 23        | 3         | <i>DNMT3A</i> | missense_variant |

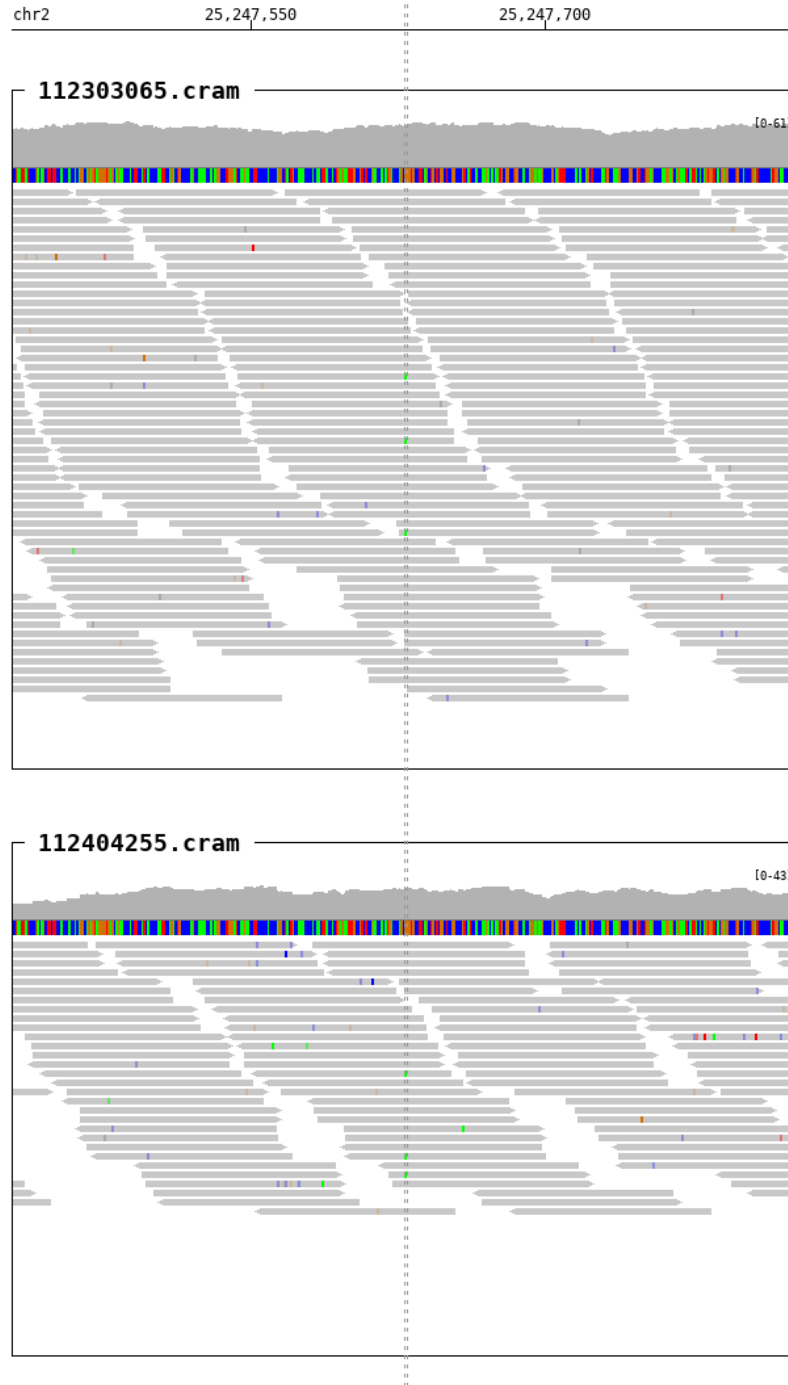

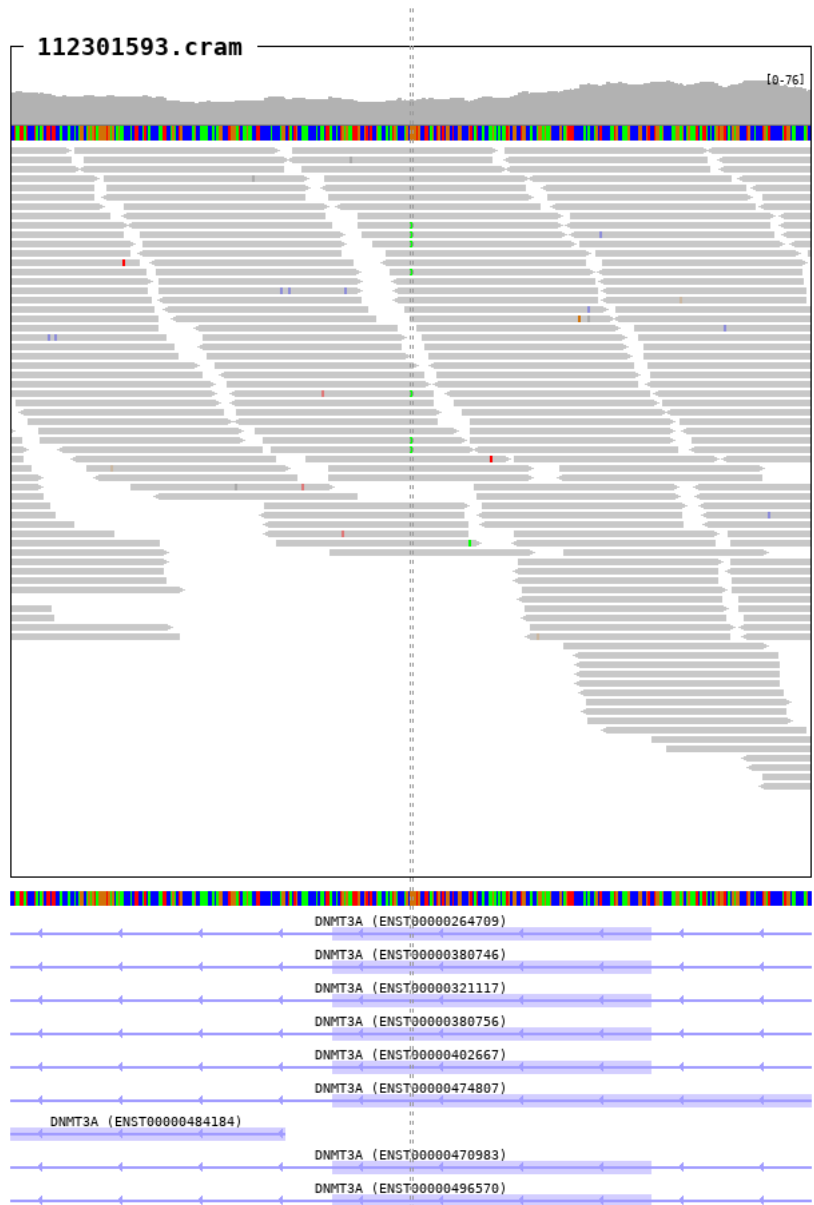

10.132. chr2\_25247647\_G/A

| SampleID  | Variants (GRCh38) | Ref_depth | Alt_depth | Gene          | Consequence |
|-----------|-------------------|-----------|-----------|---------------|-------------|
| 102104605 | chr2_25247647_G/A | 33        | 4         | <i>DNMT3A</i> | stop_gained |
| 12390273  | chr2_25247647_G/A | 39        | 7         | <i>DNMT3A</i> | stop_gained |
| 68142     | chr2_25247647_G/A | 36        | 8         | <i>DNMT3A</i> | stop_gained |

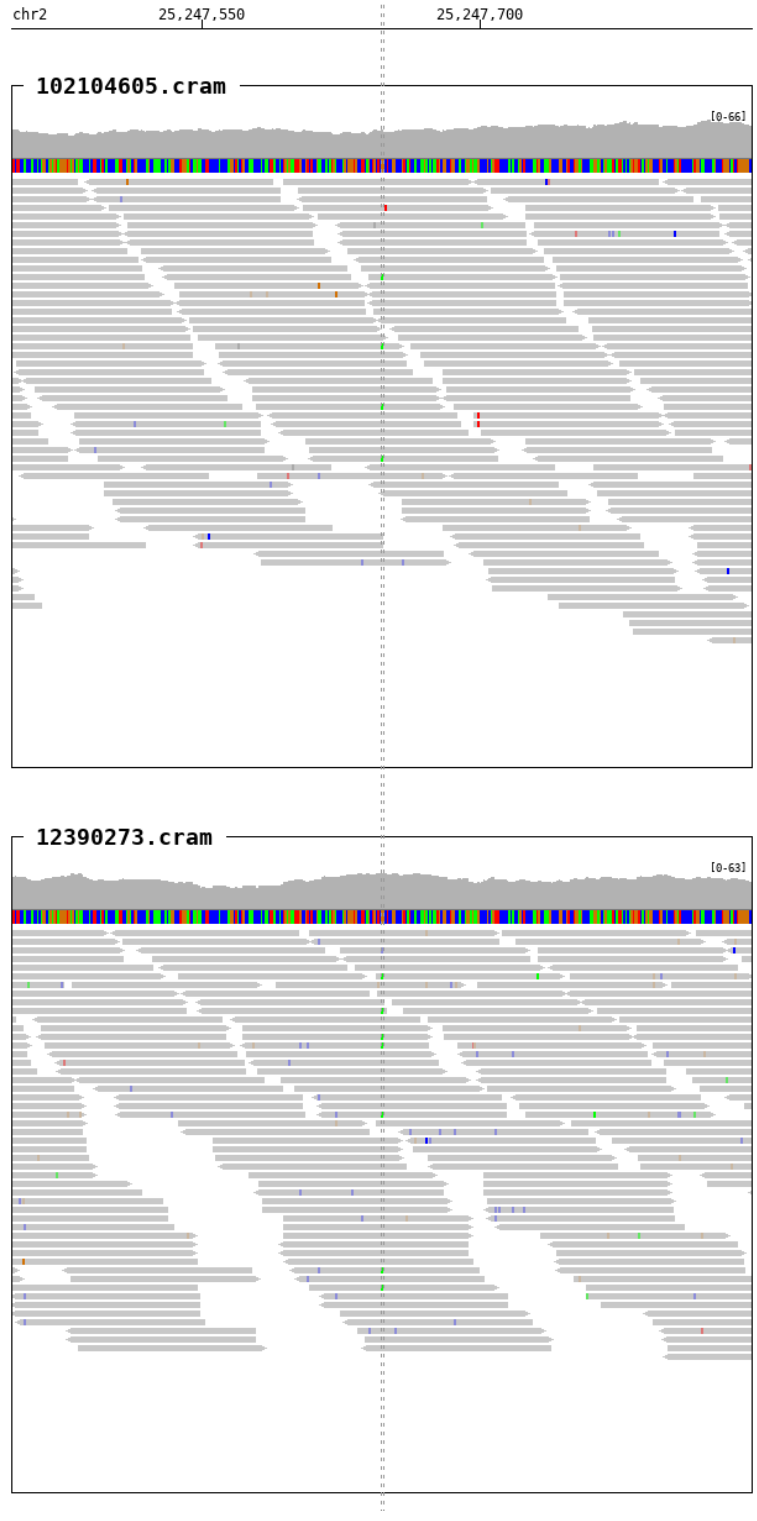

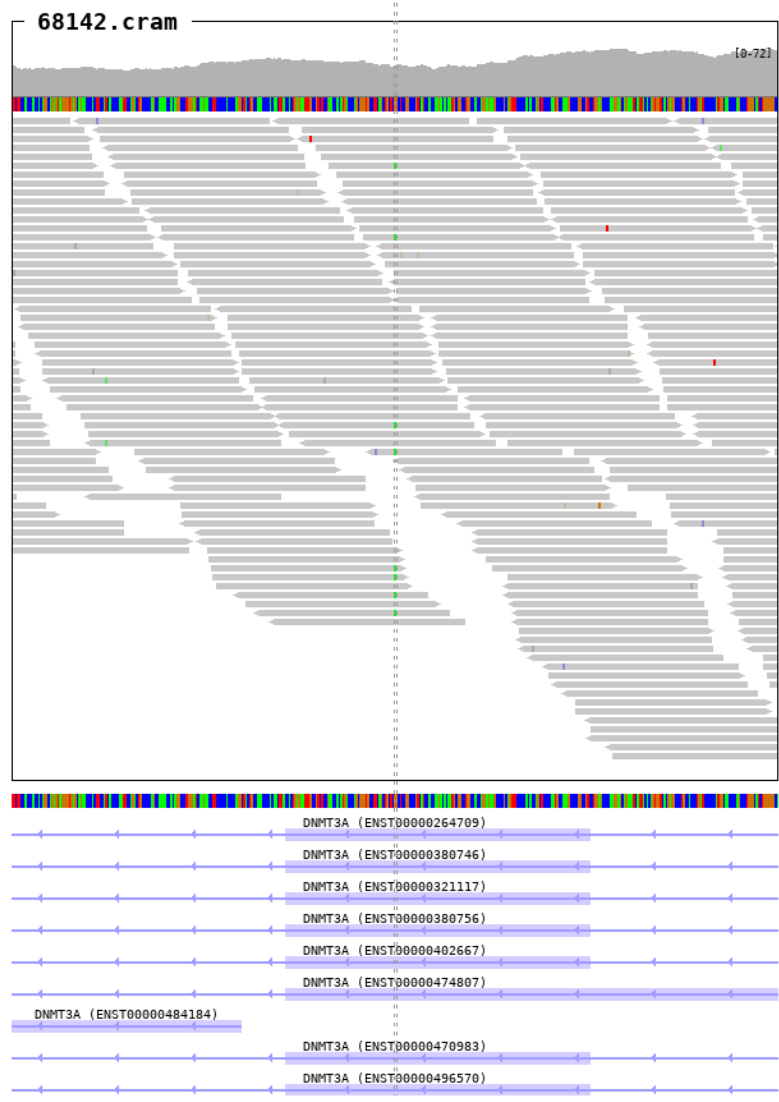

10.133. chr2\_25247666\_C/T

| SampleID | Variants (GRCh38) | Ref_depth | Alt_depth | Gene   | Consequence |
|----------|-------------------|-----------|-----------|--------|-------------|
| 10312584 | chr2_25247666_C/T | 24        | 3         | DNMT3A | stop_gained |

chr2 25,247,550 25,247,700 25,247,850

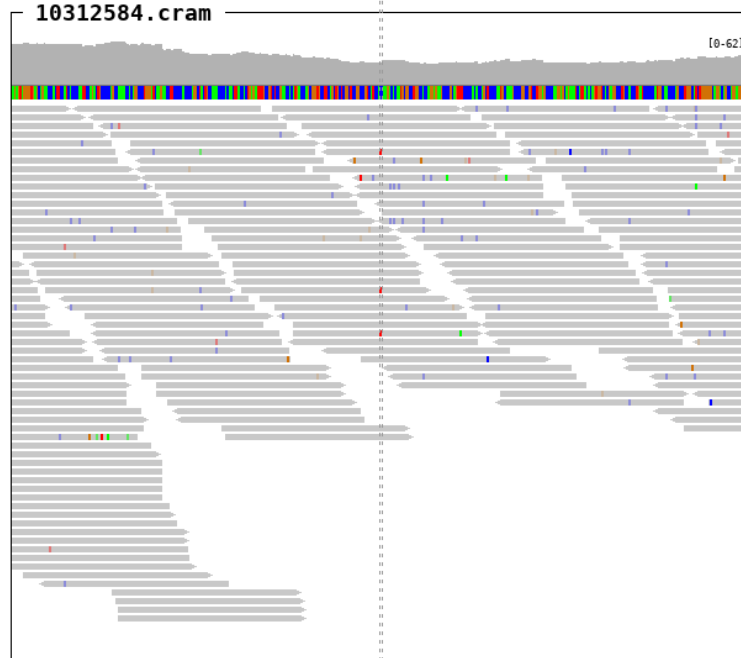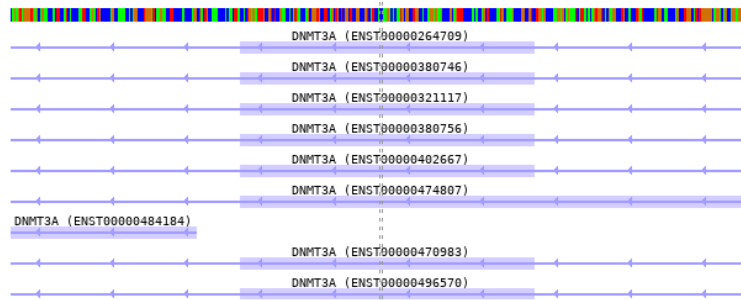

10.134. chr2\_25247690\_C/T

| SampleID  | Variants (GRCh38) | Ref_depth | Alt_depth | Gene   | Consequence |
|-----------|-------------------|-----------|-----------|--------|-------------|
| 110101830 | chr2_25247690_C/T | 31        | 5         | DNMT3A | stop_gained |

chr2 25,247,550 25,247,700 25,247,850

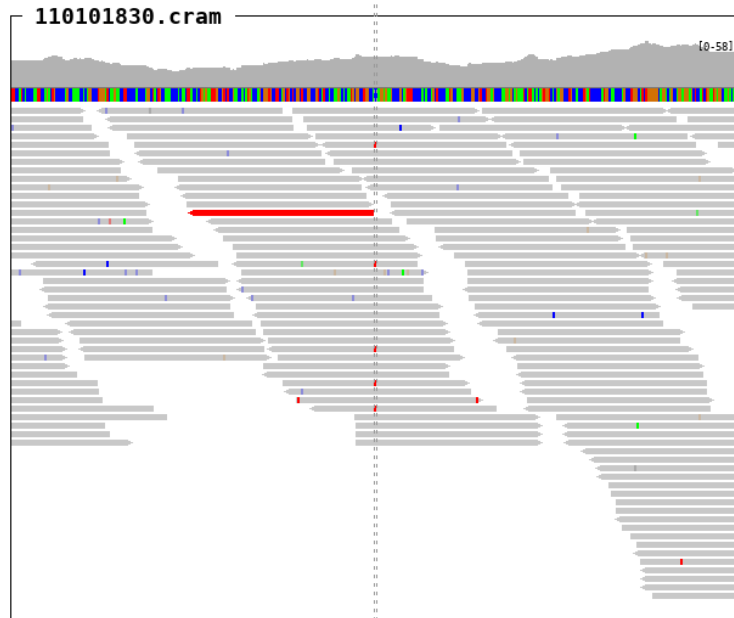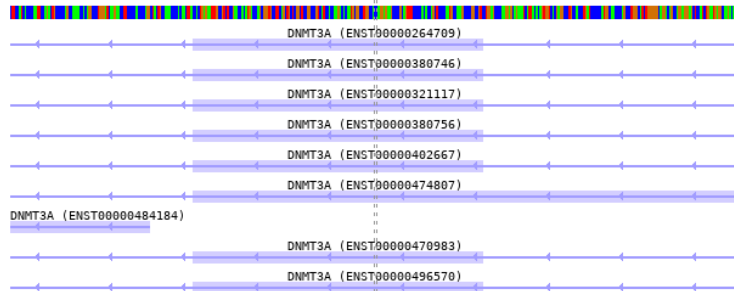

10.135. chr2\_25248093\_C/-

| SampleID  | Variants (GRCh38) | Ref_depth | Alt_depth | Gene   | Consequence        |
|-----------|-------------------|-----------|-----------|--------|--------------------|
| 100608047 | chr2_25248093_C/- | 30        | 5         | DNMT3A | frameshift_variant |

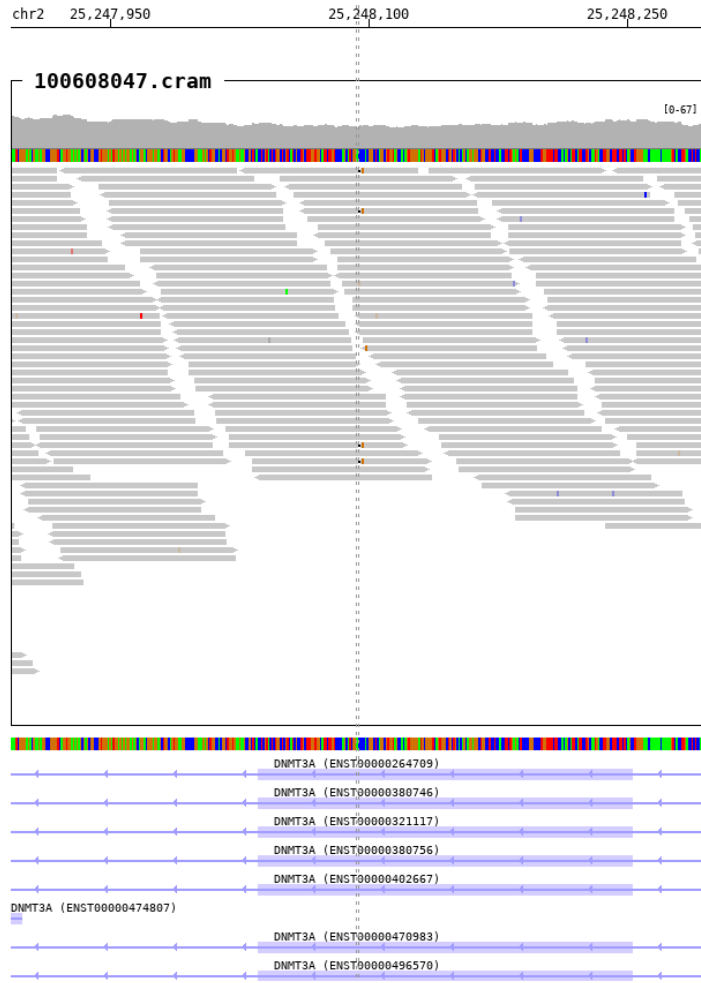

10.136. chr2\_25248132\_GG/-

| SampleID | Variants (GRCh38)  | Ref_depth | Alt_depth | Gene   | Consequence        |
|----------|--------------------|-----------|-----------|--------|--------------------|
| 60749    | chr2_25248132_GG/- | 98        | 4         | DNMT3A | frameshift_variant |

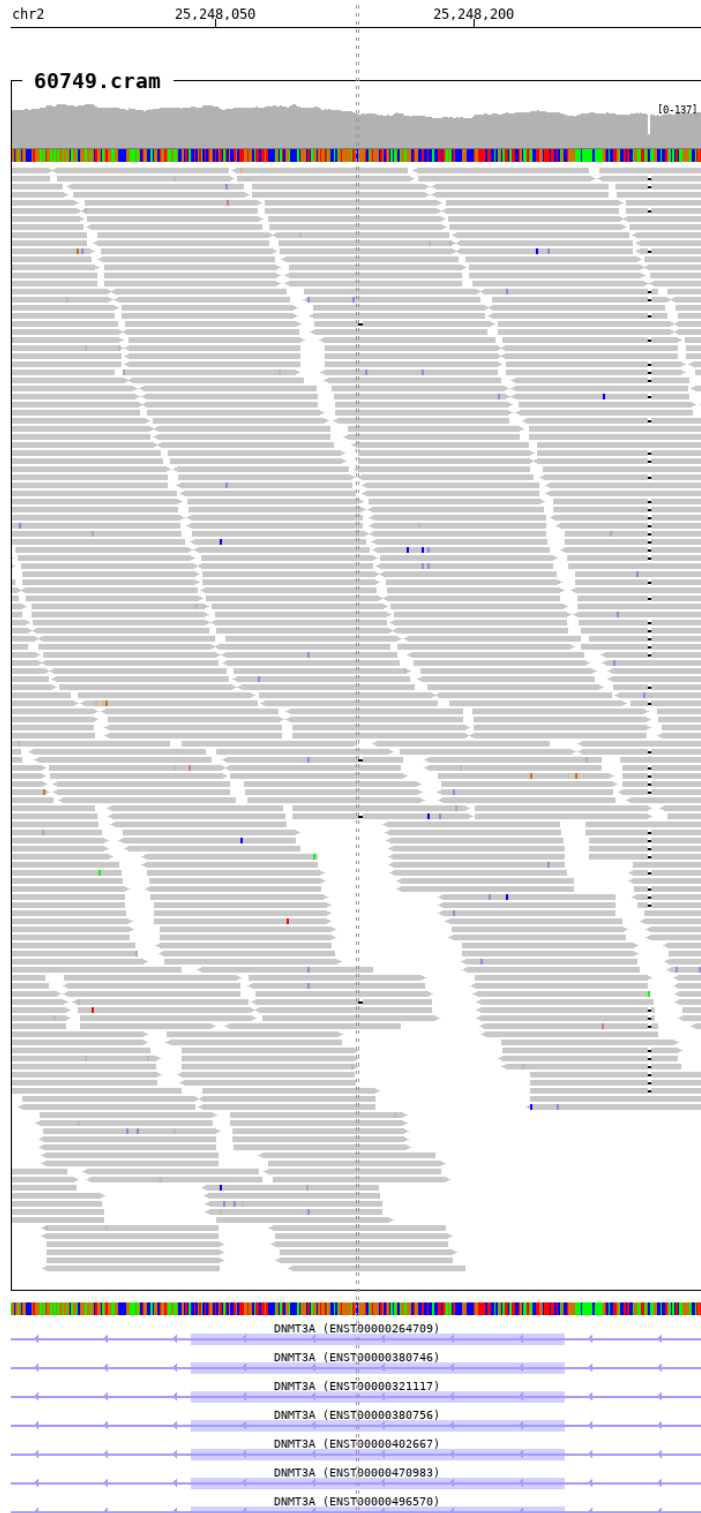

10.137. chr2\_25248157\_G/-

| SampleID   | Variants (GRCh38) | Ref_depth | Alt_depth | Gene   | Consequence        |
|------------|-------------------|-----------|-----------|--------|--------------------|
| 1308262107 | chr2_25248157_G/- | 31        | 4         | DNMT3A | frameshift_variant |

chr2 25,248,050 25,248,200 25,248,

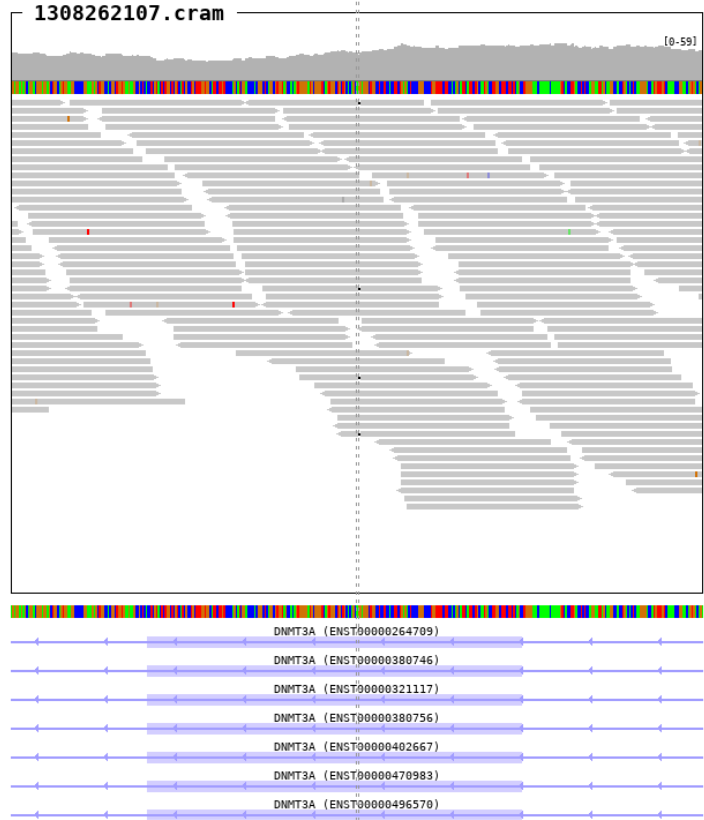

10.138. chr2\_25248201\_G/A

| SampleID  | Variants (GRCh38) | Ref_depth | Alt_depth | Gene   | Consequence |
|-----------|-------------------|-----------|-----------|--------|-------------|
| 102108234 | chr2_25248201_G/A | 37        | 3         | DNMT3A | stop_gained |

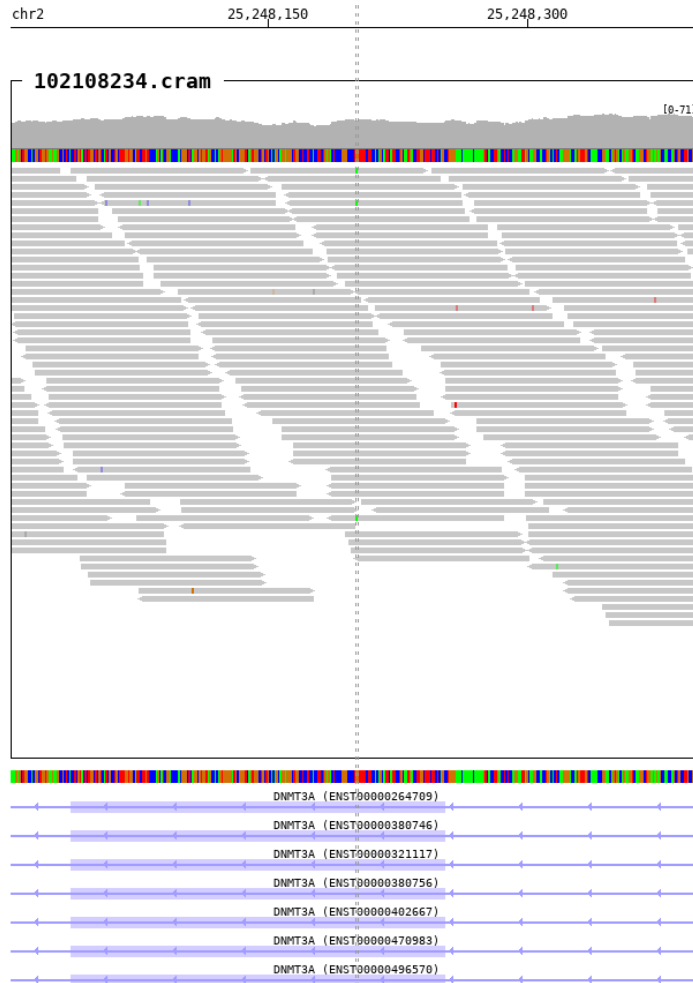

10.139. chr2\_25248220\_ATTCTGCAATGACCTT/-

| SampleID | Variants (GRCh38)                | Ref_depth | Alt_depth | Gene          | Consequence        |
|----------|----------------------------------|-----------|-----------|---------------|--------------------|
| 61538    | chr2_25248220_ATTCTGCAATGACCTT/- | 65        | 3         | <i>DNMT3A</i> | frameshift_variant |

chr2 25,248,150 25,248,300

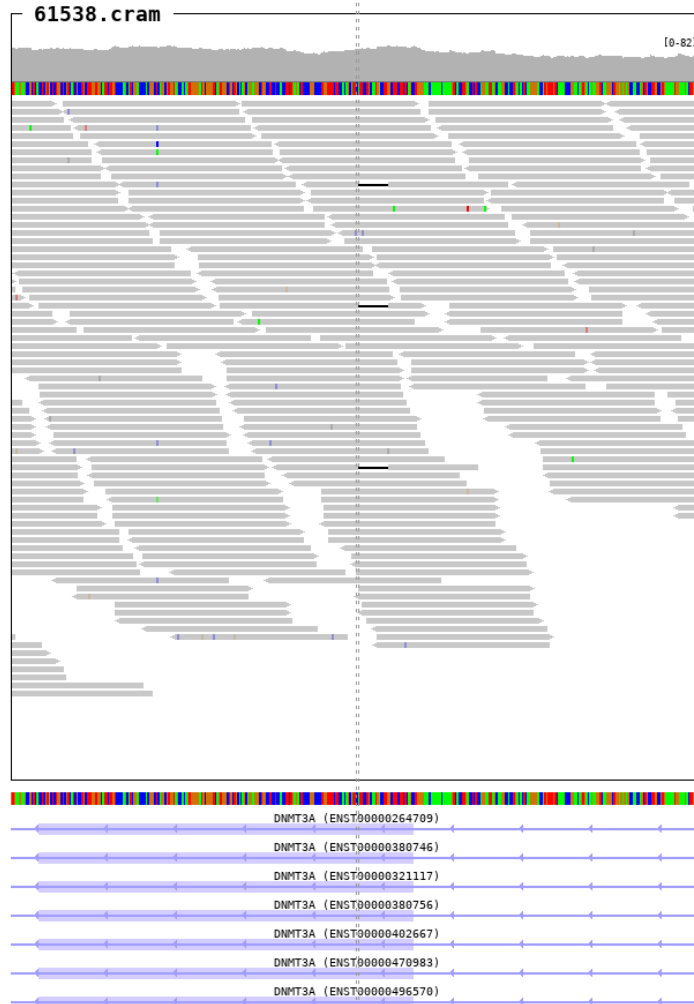

10.140. chr2\_25274917\_GCCCAGGCCAGAAGGCGCCTCA/-

| SampleID | Variants (GRCh38)                          | Ref_depth | Alt_depth | Gene   | Consequence          |
|----------|--------------------------------------------|-----------|-----------|--------|----------------------|
| 63531    | chr2_25274917_GCCCAGGCC<br>AGAAGGCGCCTCA/- | 83        | 3         | DNMT3A | splice_donor_variant |

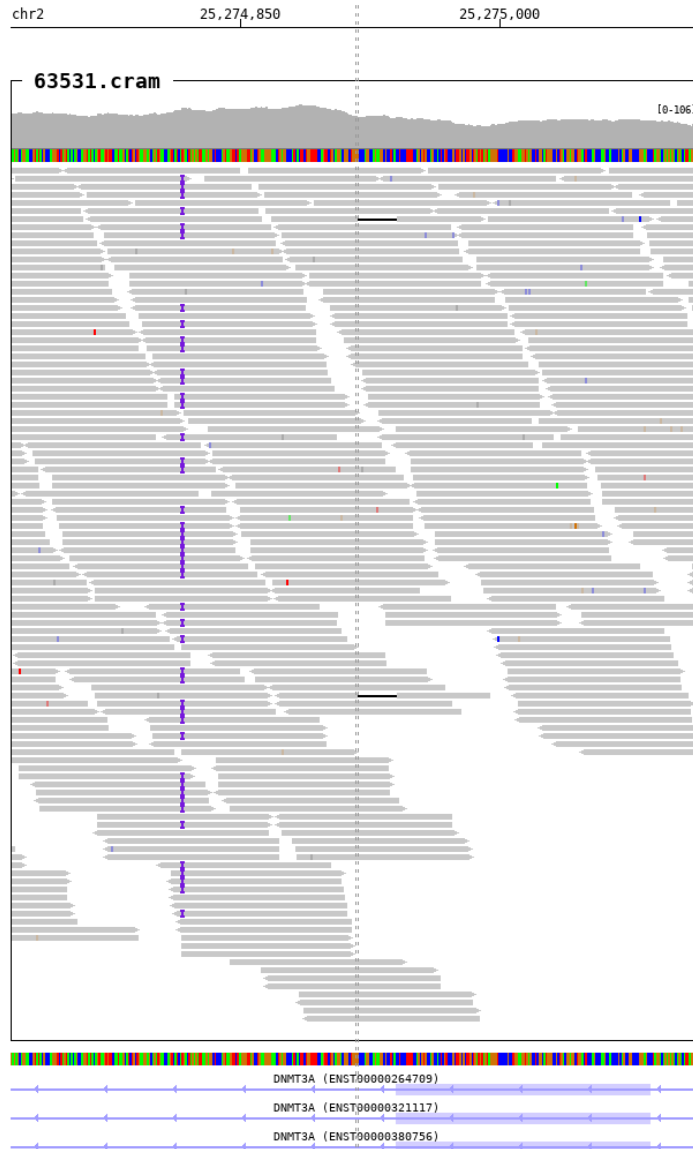

11. *EED*

11.1. chr11\_86257597\_G/A

| SampleID  | Variants (GRCh38)  | Ref_depth | Alt_depth | Gene       | Consequence          |
|-----------|--------------------|-----------|-----------|------------|----------------------|
| 110101775 | chr11_86257597_G/A | 40        | 4         | <i>EED</i> | splice_donor_variant |

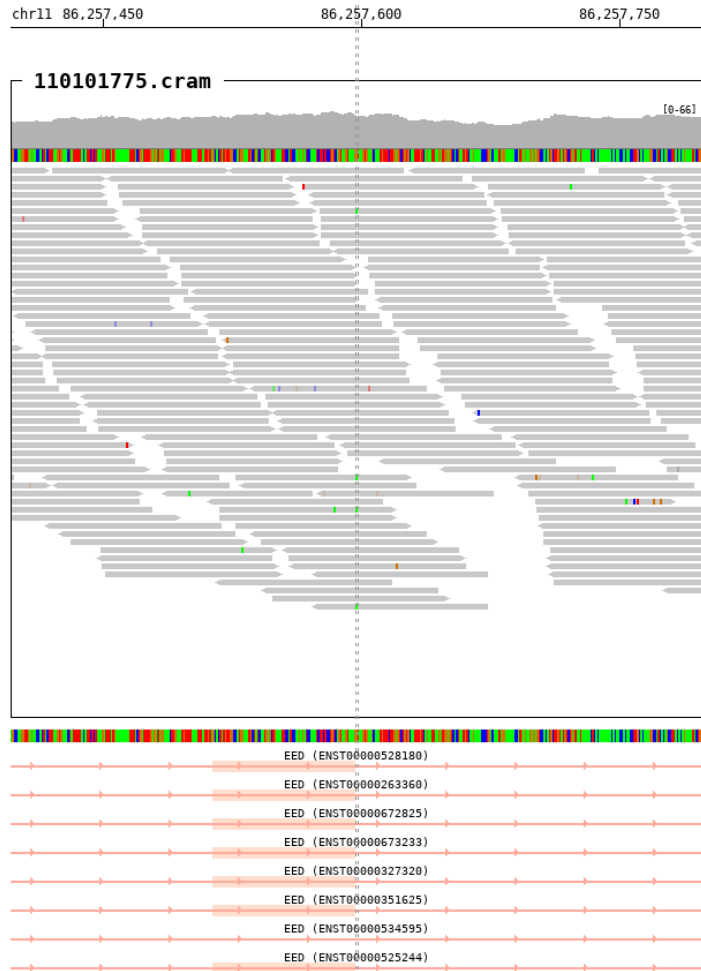

## 12. FLT3

### 12.1. chr13\_28004078\_G/A

| SampleID  | Variants (GRCh38)  | Ref_depth | Alt_depth | Gene | Consequence      |
|-----------|--------------------|-----------|-----------|------|------------------|
| 110102859 | chr13_28004078_G/A | 26        | 10        | FLT3 | missense_variant |

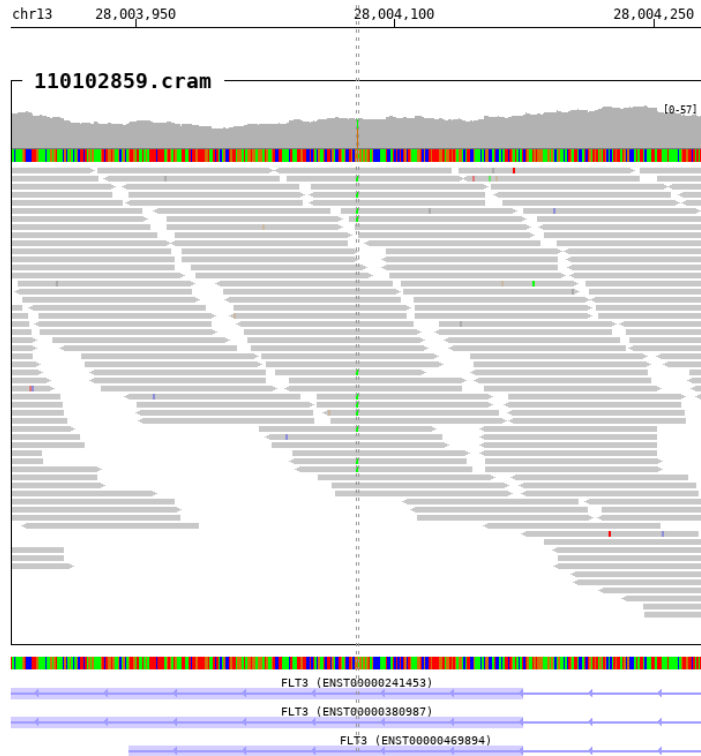

### 13. GATA1

#### 13.1. chrX\_48791231\_T/A

| SampleID | Variants (GRCh38) | Ref_depth | Alt_depth | Gene  | Consequence |
|----------|-------------------|-----------|-----------|-------|-------------|
| 10770651 | chrX_48791231_T/A | 24        | 3         | GATA1 | stop_gained |

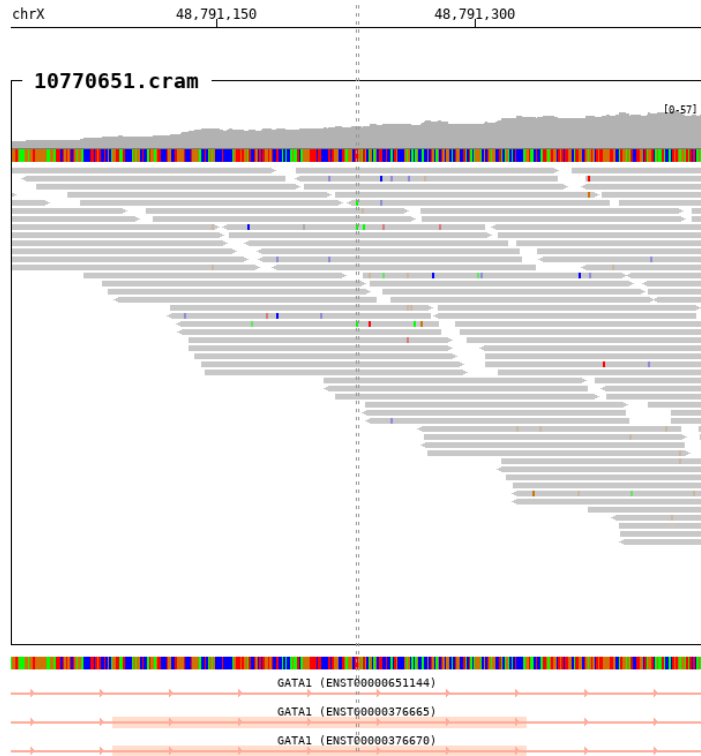

## 14. GATA3

### 14.1. chr10\_8055884\_CGACCCACCACGGTGTAGTGCGCCCGGGGTGCCGGGGCTC CCG/-

| SampleID  | Variants (GRCh38)                                           | Ref_depth | Alt_depth | Gene  | Consequence          |
|-----------|-------------------------------------------------------------|-----------|-----------|-------|----------------------|
| 100609770 | chr10_8055884_CGACCCACCACGGTGTAGTGCGCCCGGGGTGCCGGGGCTCCCG/- | 59        | 3         | GATA3 | splice_donor_variant |
| 100609778 | chr10_8055884_CGACCCACCACGGTGTAGTGCGCCCGGGGTGCCGGGGCTCCCG/- | 62        | 3         | GATA3 | splice_donor_variant |

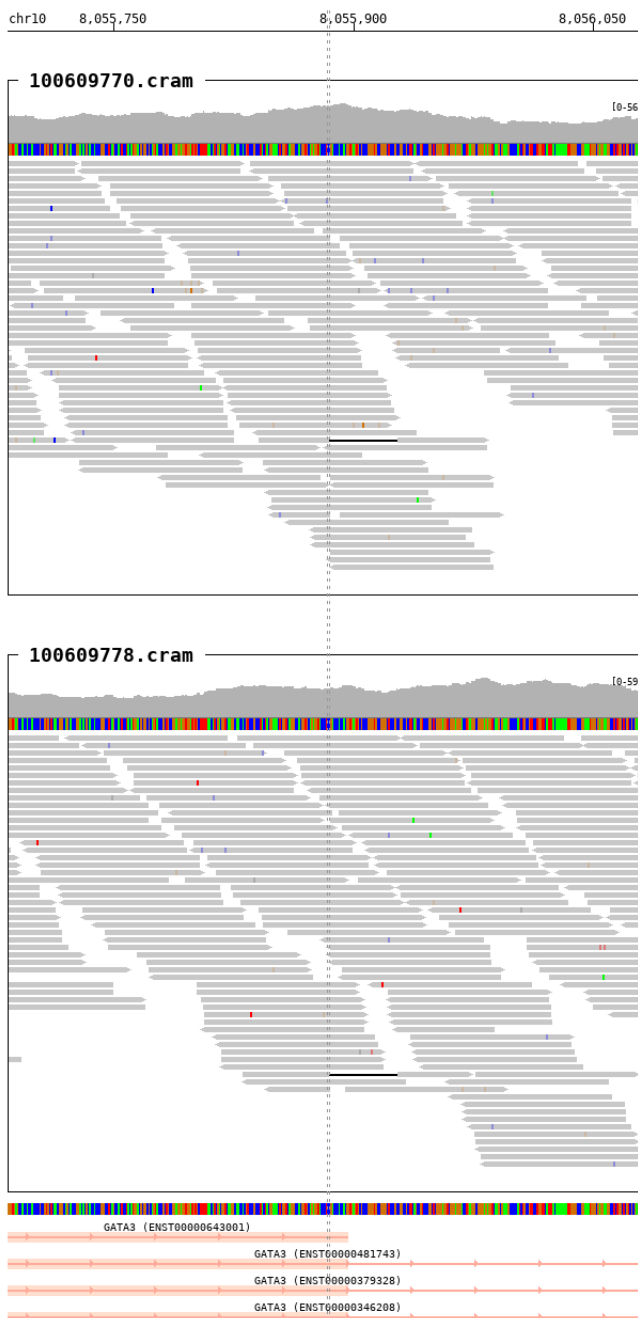

## 15. GNAS

### 15.1. chr20\_58909365\_C/T

| SampleID   | Variants (GRCh38)  | Ref_depth | Alt_depth | Gene | Consequence      |
|------------|--------------------|-----------|-----------|------|------------------|
| 10310293   | chr20_58909365_C/T | 43        | 4         | GNAS | missense_variant |
| 1501031228 | chr20_58909365_C/T | 37        | 4         | GNAS | missense_variant |

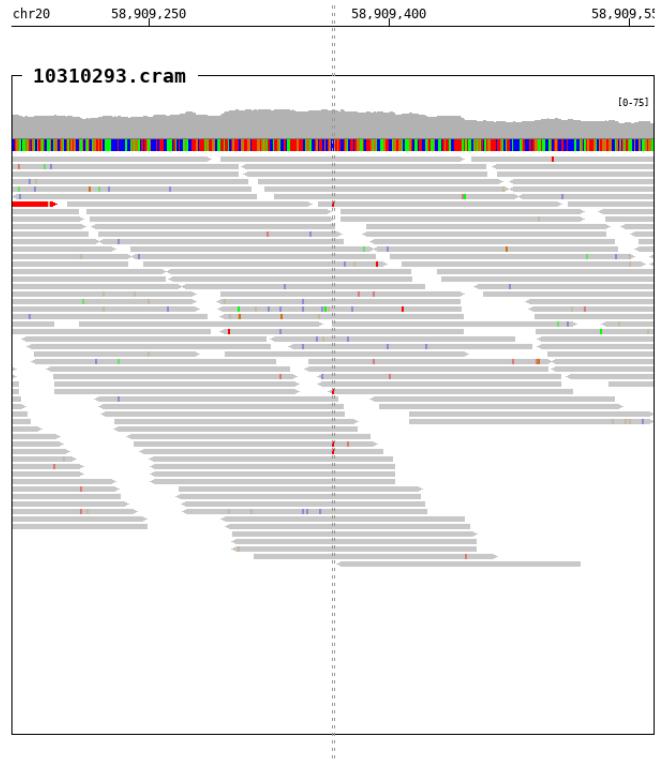

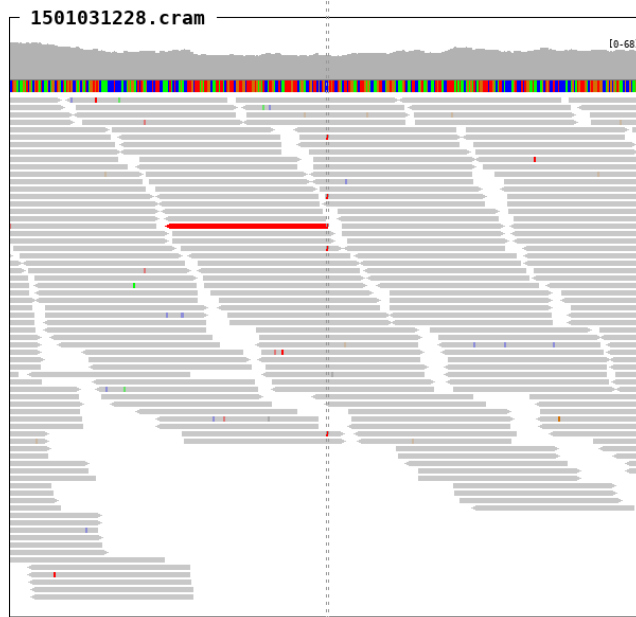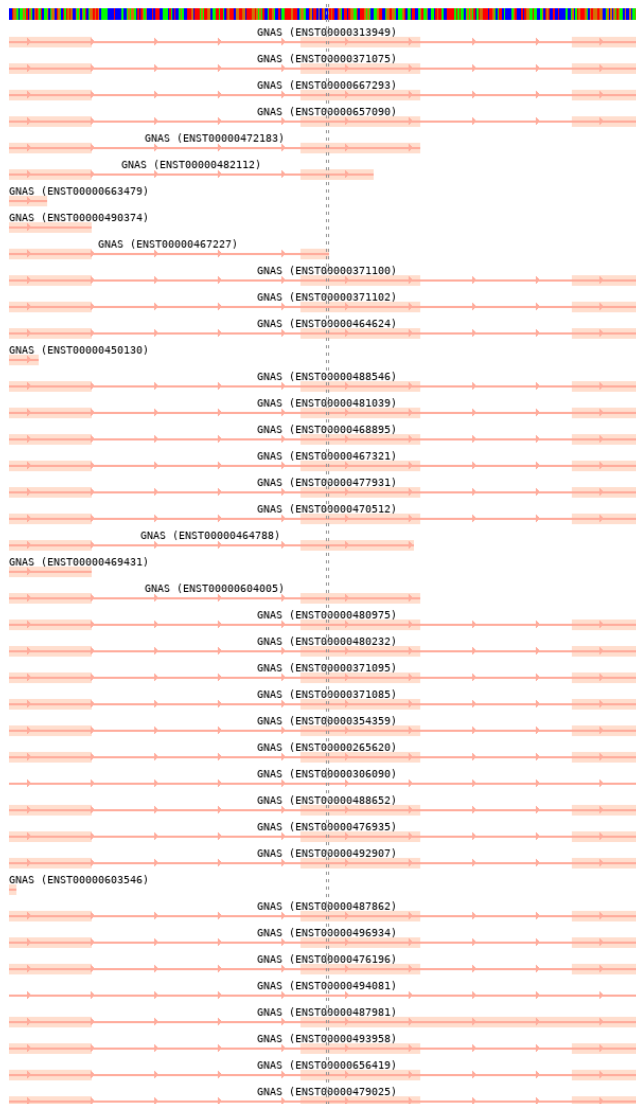

15.2. chr20\_58909366\_G/A

| SampleID  | Variants (GRCh38)  | Ref_depth | Alt_depth | Gene | Consequence      |
|-----------|--------------------|-----------|-----------|------|------------------|
| 100600326 | chr20_58909366_G/A | 50        | 3         | GNAS | missense_variant |
| 101102640 | chr20_58909366_G/A | 39        | 4         | GNAS | missense_variant |
| 101104757 | chr20_58909366_G/A | 39        | 4         | GNAS | missense_variant |
| 101608790 | chr20_58909366_G/A | 60        | 4         | GNAS | missense_variant |
| 101609293 | chr20_58909366_G/A | 60        | 4         | GNAS | missense_variant |
| 102102513 | chr20_58909366_G/A | 37        | 8         | GNAS | missense_variant |
| 110106805 | chr20_58909366_G/A | 43        | 4         | GNAS | missense_variant |

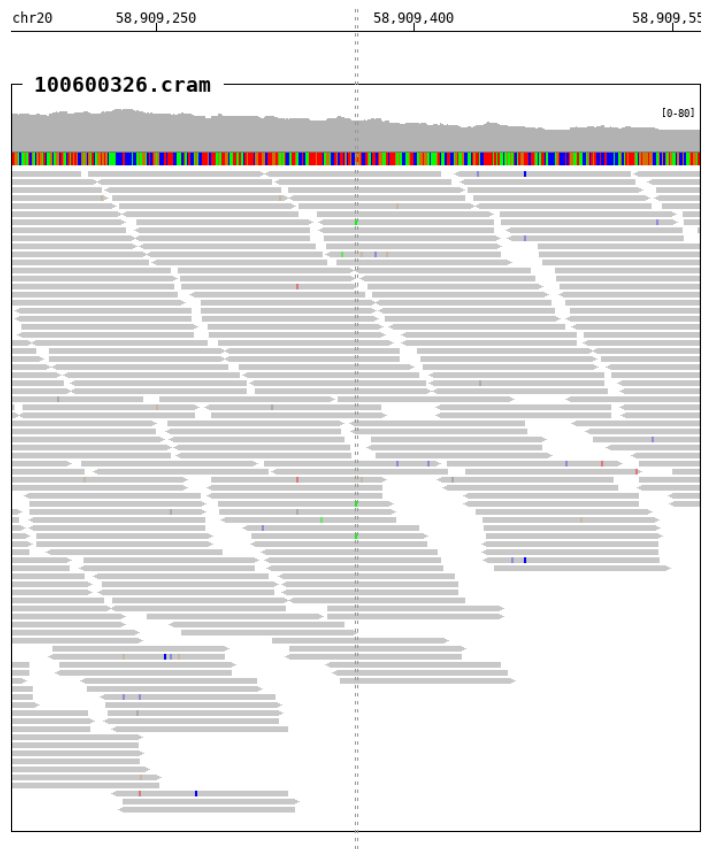

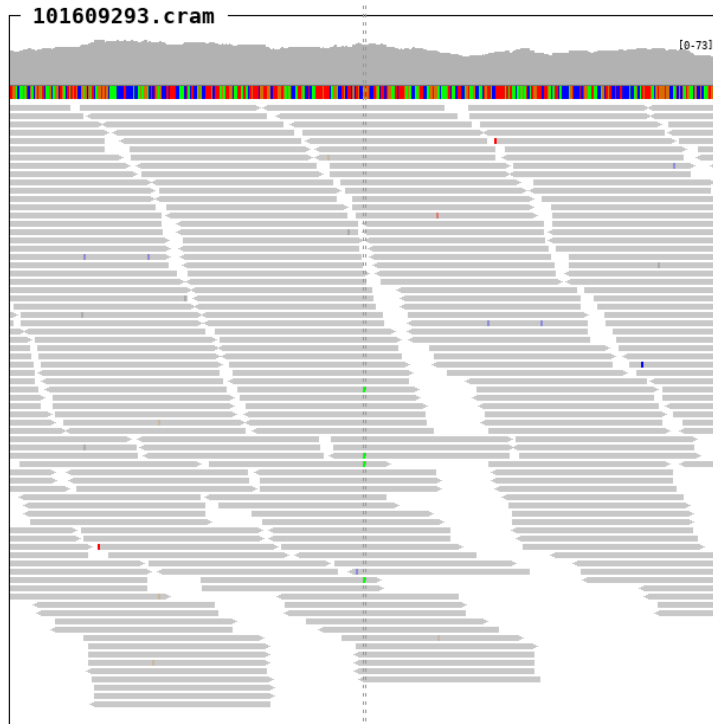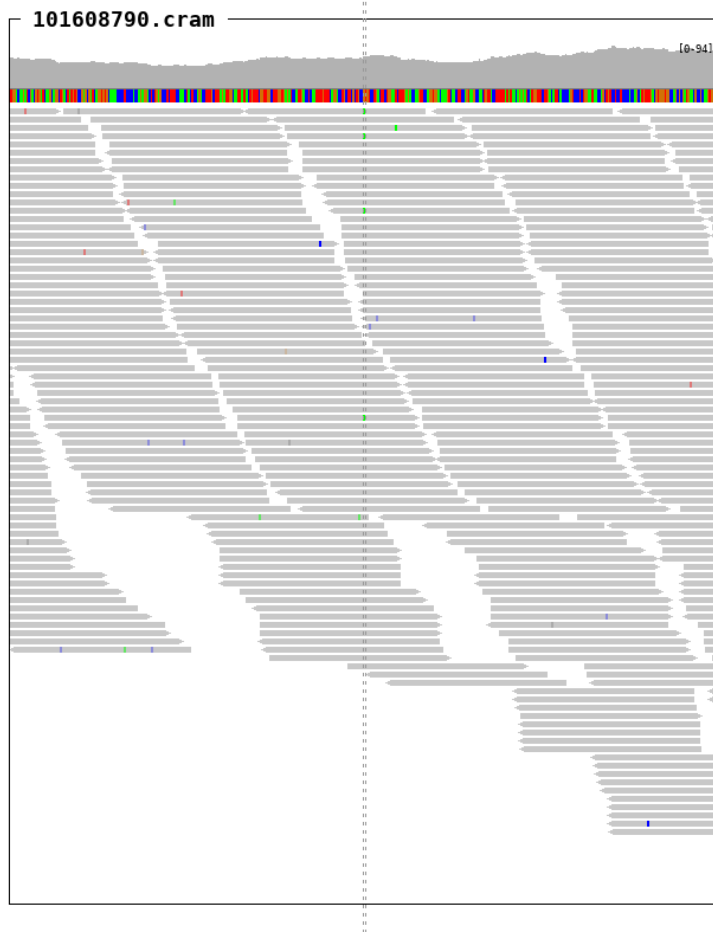

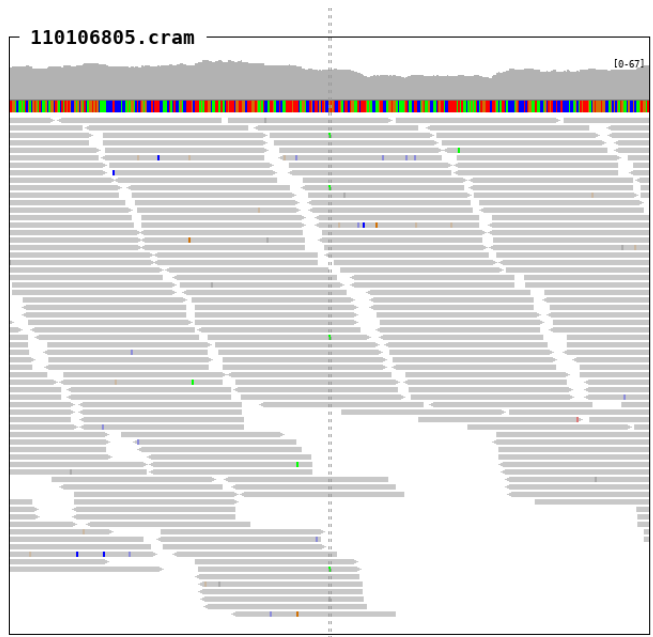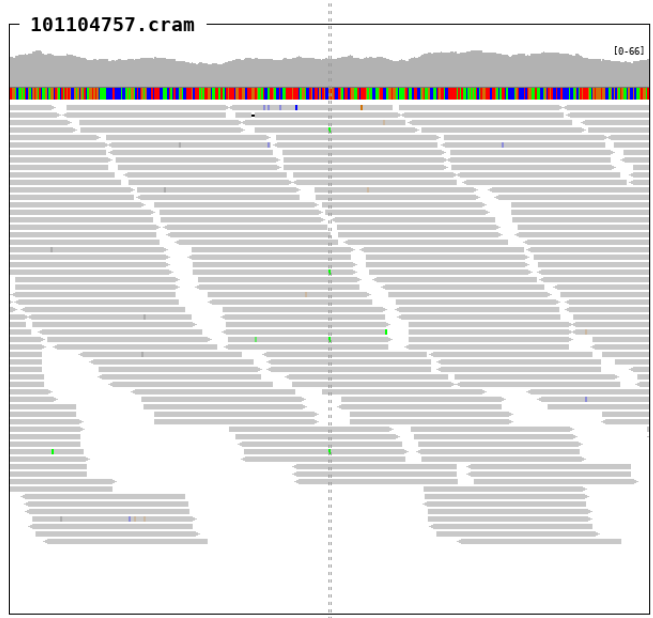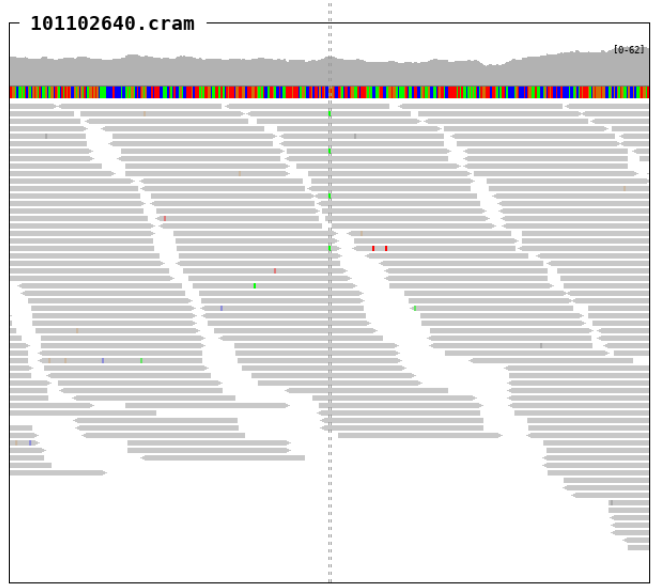

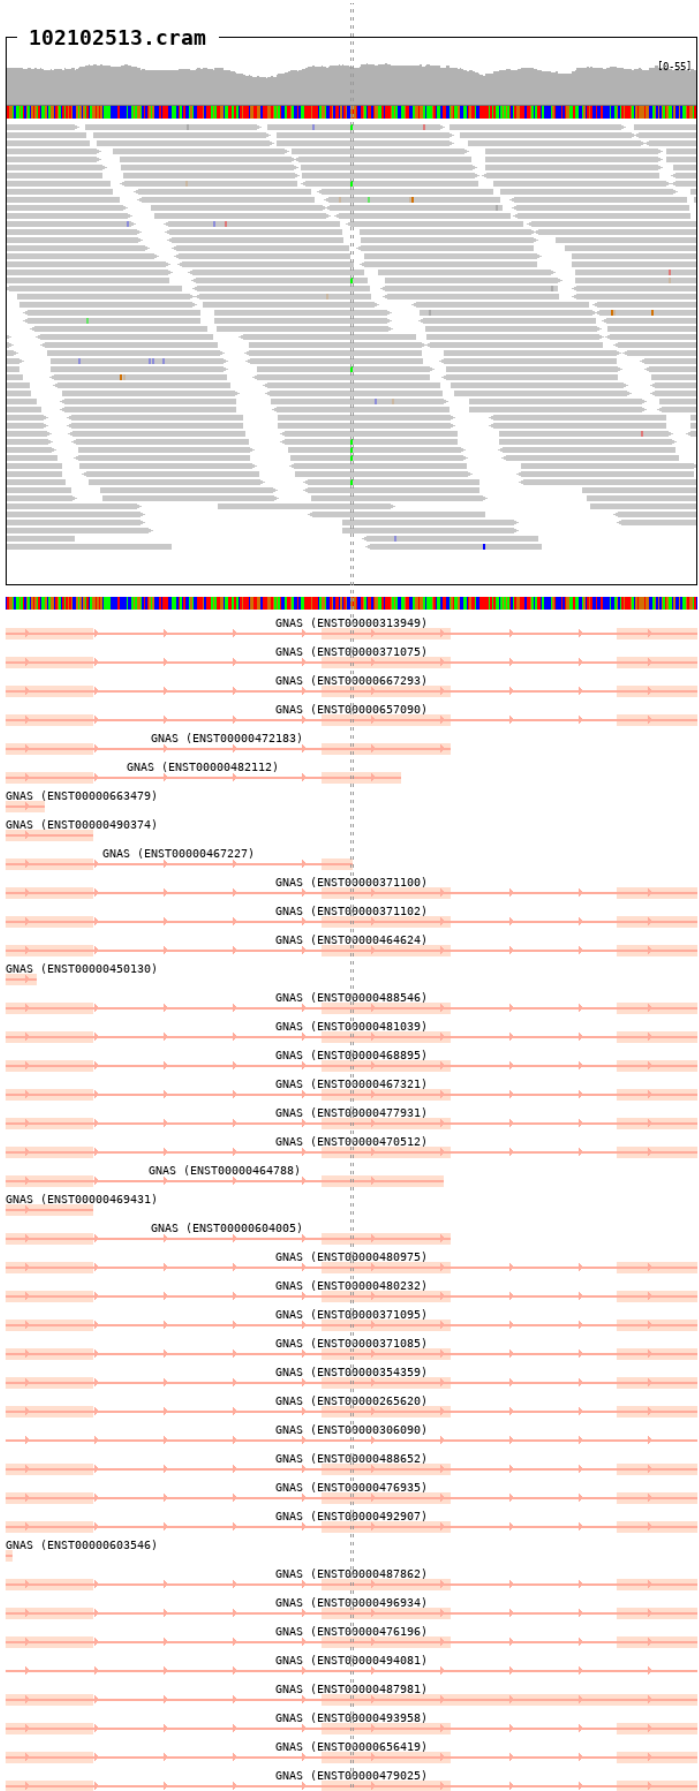

16. *GNB1*

16.1. chr1\_1815789\_T/A

| SampleID  | Variants (GRCh38) | Ref_depth | Alt_depth | Gene        | Consequence      |
|-----------|-------------------|-----------|-----------|-------------|------------------|
| 101106213 | chr1_1815789_T/A  | 32        | 3         | <i>GNB1</i> | missense_variant |

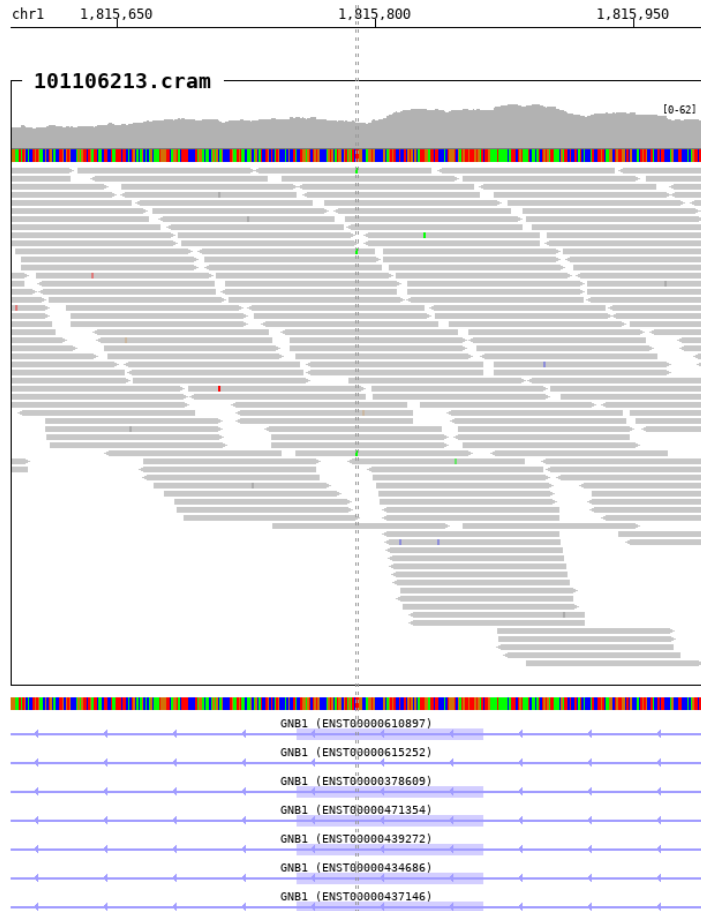

16.2. chr1\_1815790\_T/C

| SampleID  | Variants (GRCh38) | Ref_depth | Alt_depth | Gene        | Consequence      |
|-----------|-------------------|-----------|-----------|-------------|------------------|
| 100601497 | chr1_1815790_T/C  | 50        | 5         | <i>GNB1</i> | missense_variant |
| 101104686 | chr1_1815790_T/C  | 34        | 4         | <i>GNB1</i> | missense_variant |
| 102104451 | chr1_1815790_T/C  | 36        | 5         | <i>GNB1</i> | missense_variant |
| 10310279  | chr1_1815790_T/C  | 39        | 7         | <i>GNB1</i> | missense_variant |
| 10511637  | chr1_1815790_T/C  | 45        | 4         | <i>GNB1</i> | missense_variant |
| 10642350  | chr1_1815790_T/C  | 51        | 6         | <i>GNB1</i> | missense_variant |
| 11050788  | chr1_1815790_T/C  | 46        | 7         | <i>GNB1</i> | missense_variant |
| 112401604 | chr1_1815790_T/C  | 30        | 4         | <i>GNB1</i> | missense_variant |
| 68066     | chr1_1815790_T/C  | 45        | 4         | <i>GNB1</i> | missense_variant |

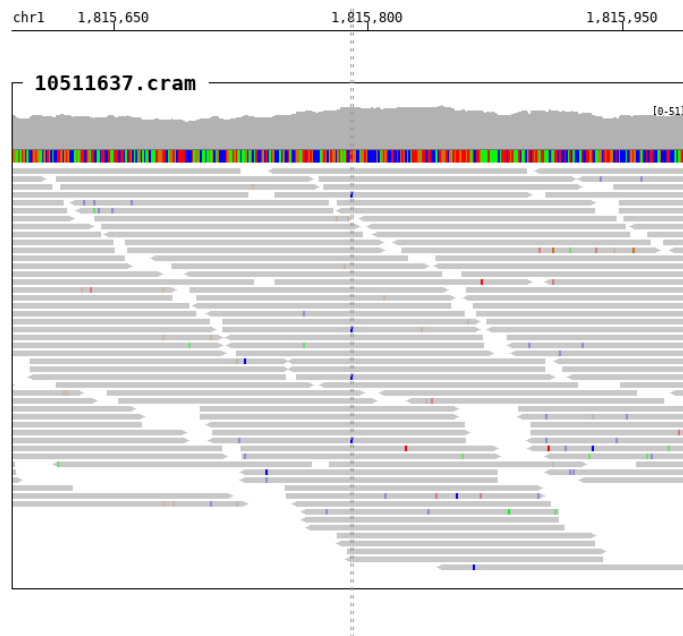

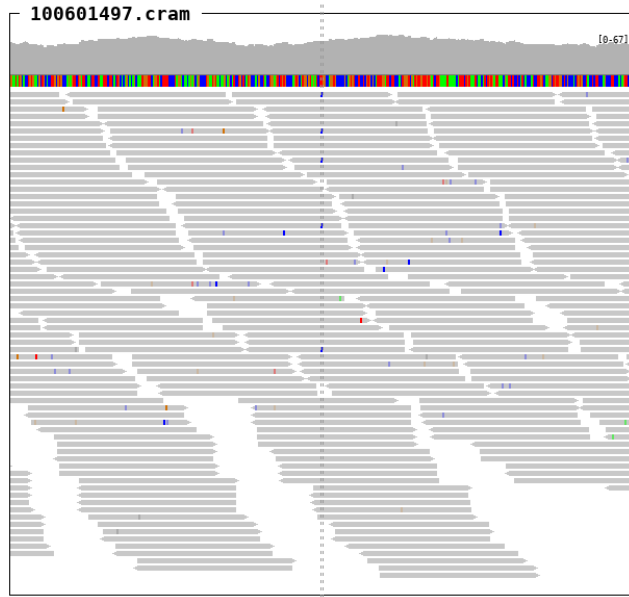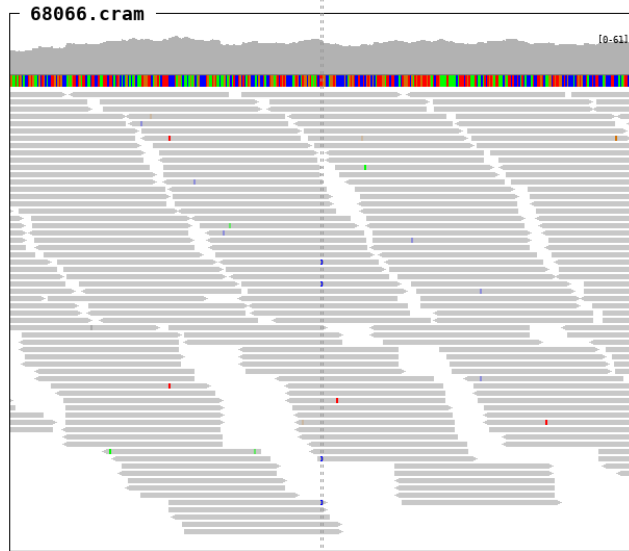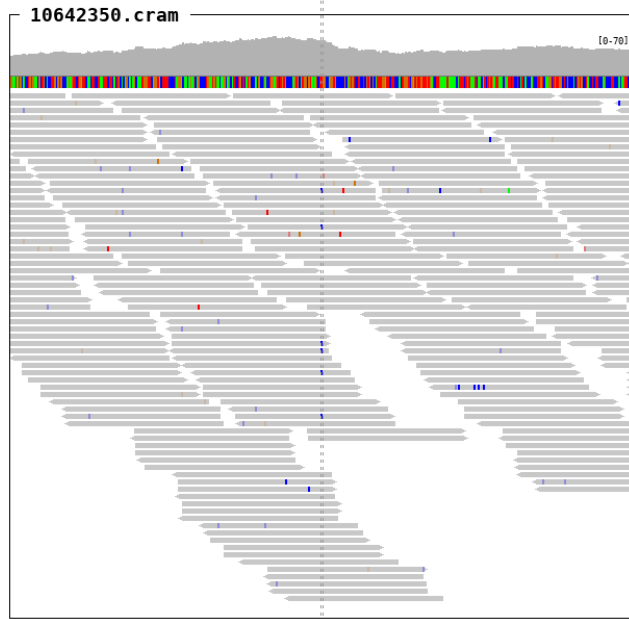

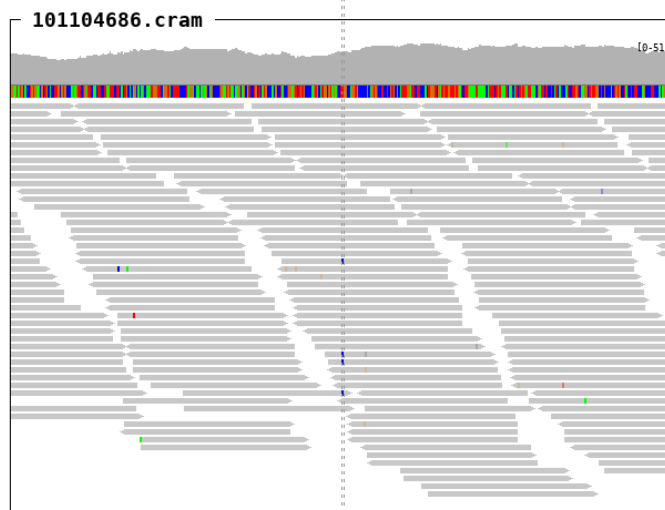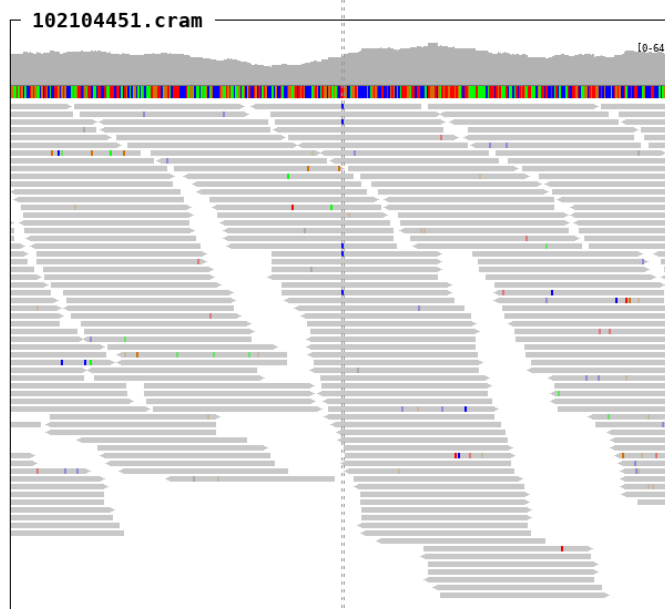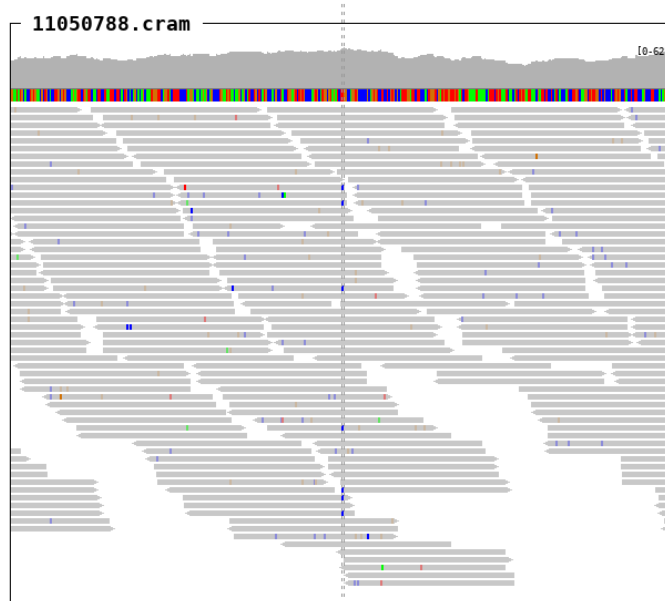

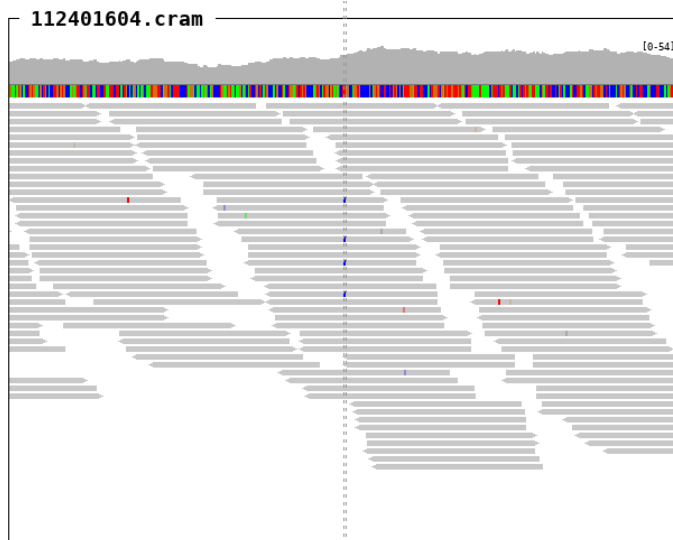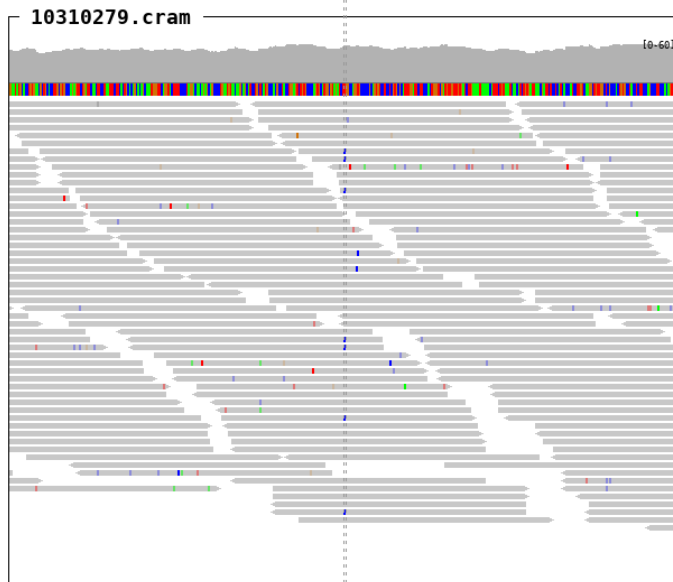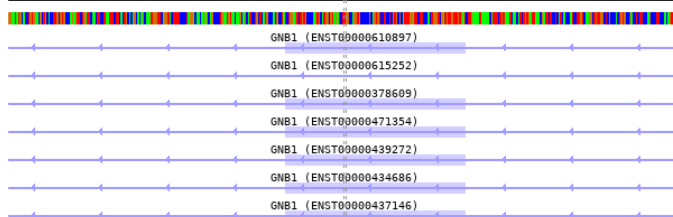

## 17. JAK2

### 17.1. chr9\_5073770\_G/T

| SampleID   | Variants (GRCh38) | Ref_depth | Alt_depth | Gene | Consequence      |
|------------|-------------------|-----------|-----------|------|------------------|
| 10010583   | chr9_5073770_G/T  | 26        | 5         | JAK2 | missense_variant |
| 100601788  | chr9_5073770_G/T  | 41        | 4         | JAK2 | missense_variant |
| 101608575  | chr9_5073770_G/T  | 33        | 6         | JAK2 | missense_variant |
| 102104826  | chr9_5073770_G/T  | 5         | 32        | JAK2 | missense_variant |
| 102105613  | chr9_5073770_G/T  | 57        | 6         | JAK2 | missense_variant |
| 102105991  | chr9_5073770_G/T  | 37        | 5         | JAK2 | missense_variant |
| 10510596   | chr9_5073770_G/T  | 41        | 6         | JAK2 | missense_variant |
| 112300508  | chr9_5073770_G/T  | 37        | 5         | JAK2 | missense_variant |
| 112406616  | chr9_5073770_G/T  | 34        | 4         | JAK2 | missense_variant |
| 11311217   | chr9_5073770_G/T  | 44        | 5         | JAK2 | missense_variant |
| 1308262135 | chr9_5073770_G/T  | 6         | 41        | JAK2 | missense_variant |
| 1504233344 | chr9_5073770_G/T  | 34        | 7         | JAK2 | missense_variant |

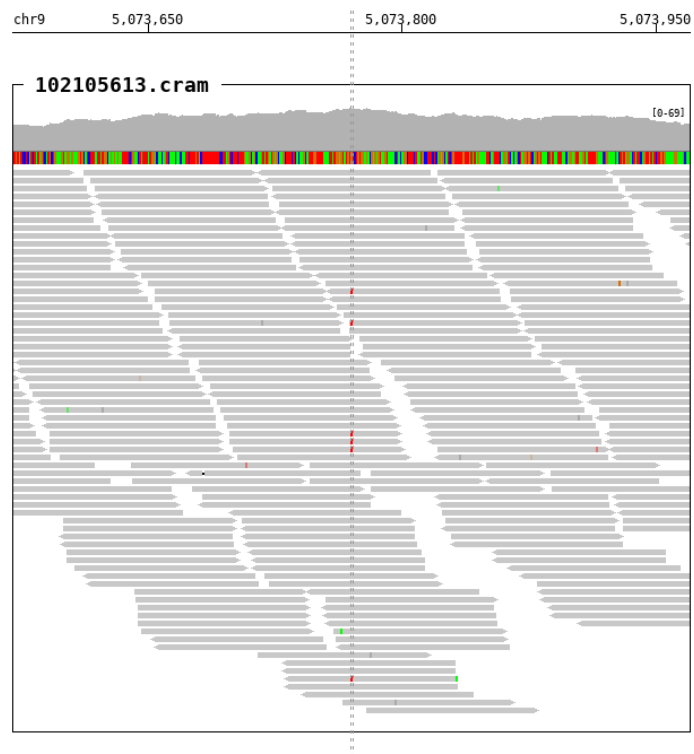

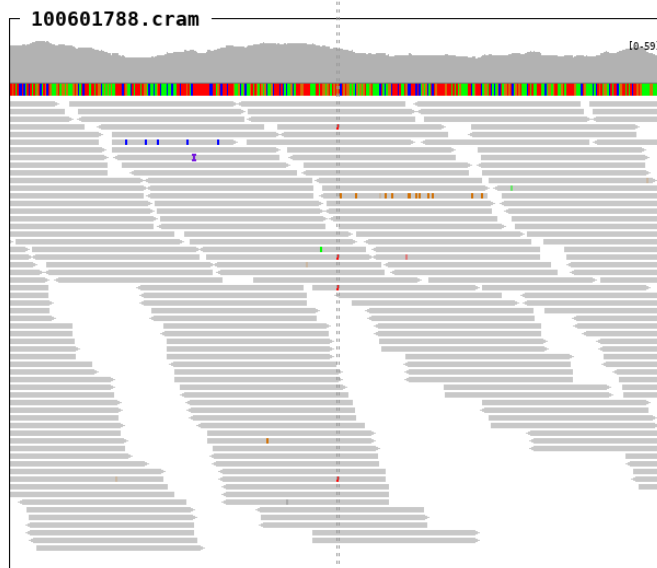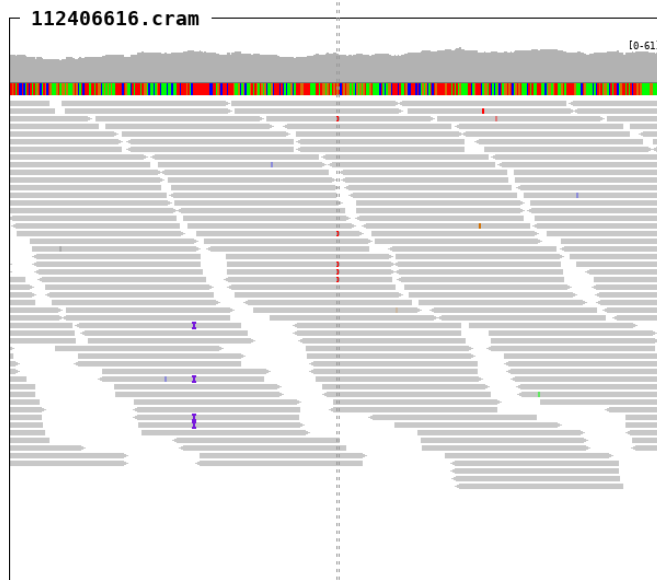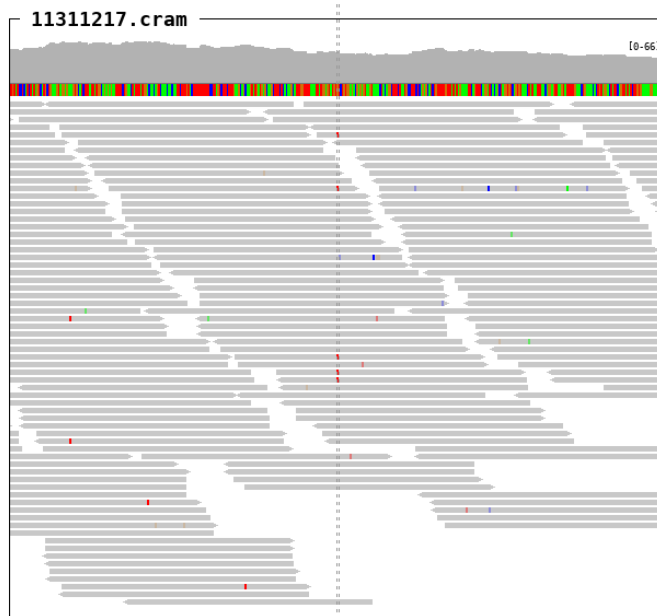

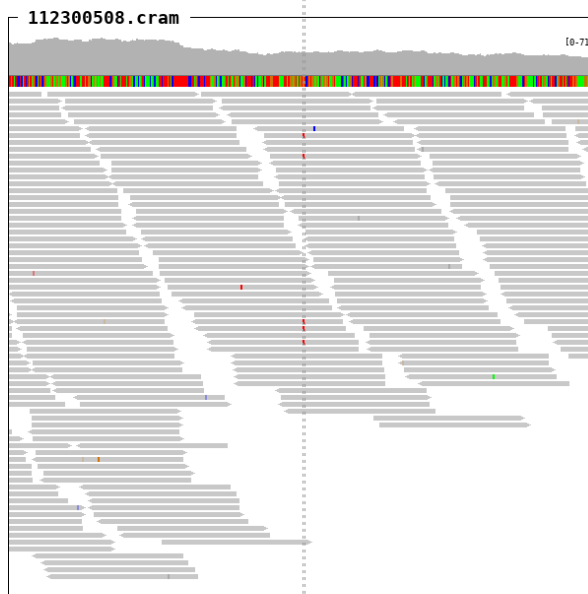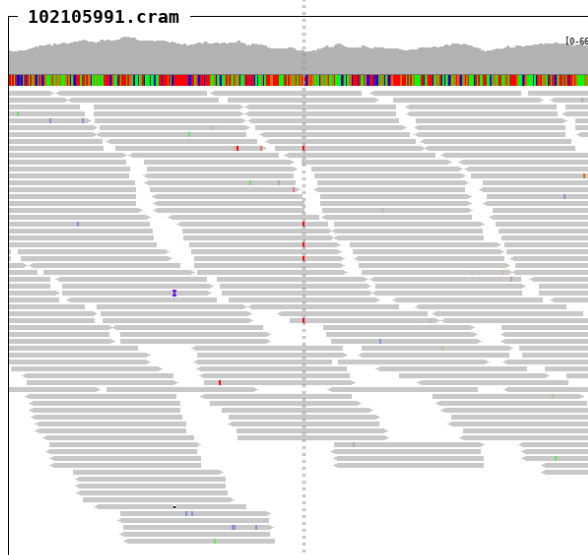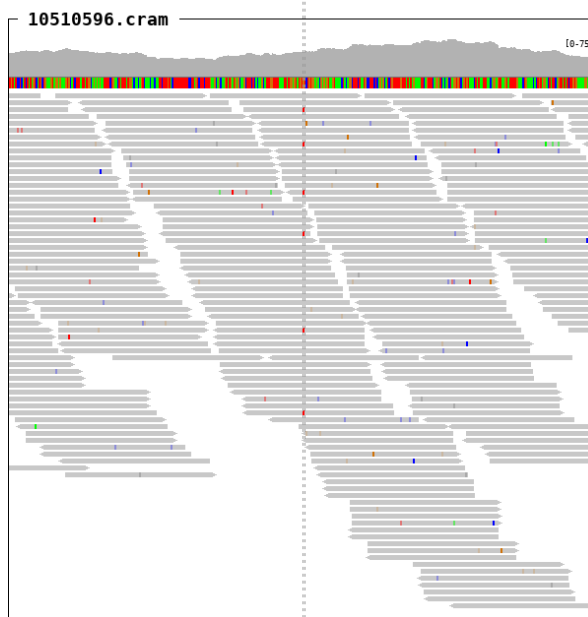

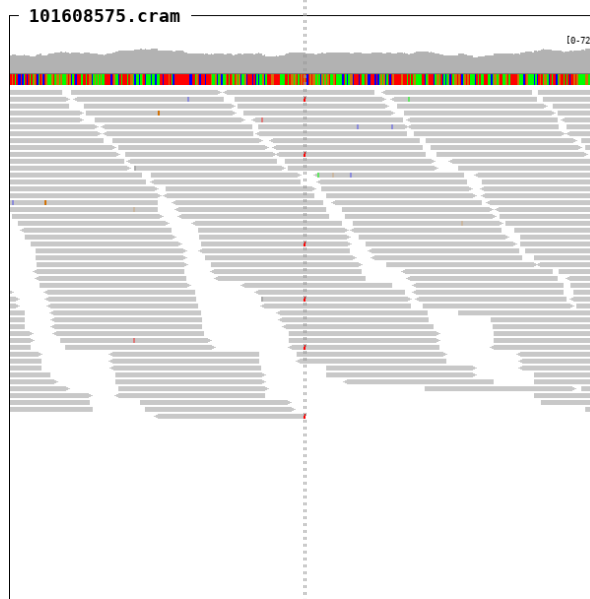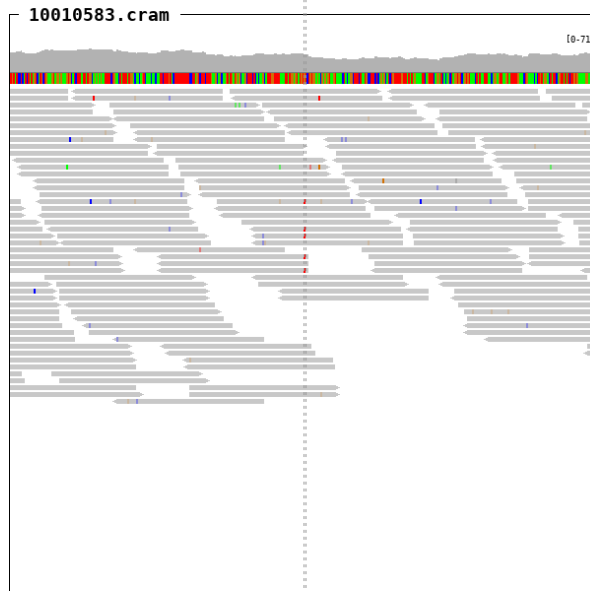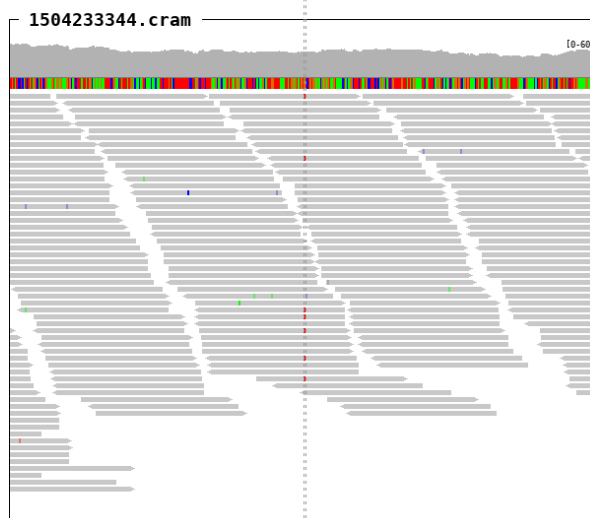

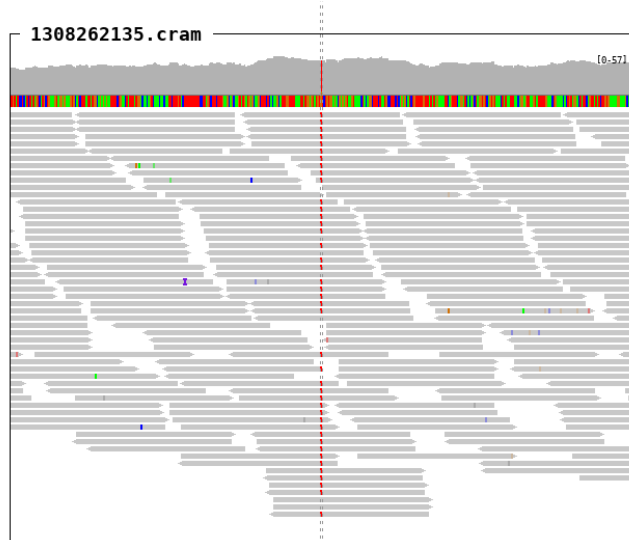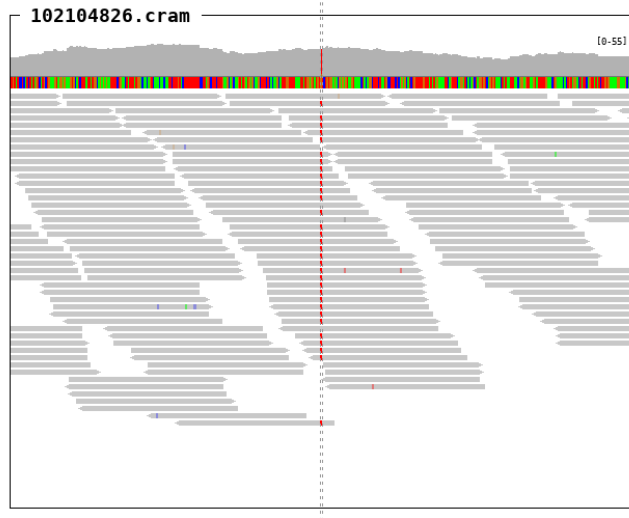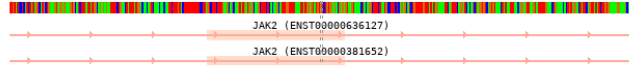

18. *KDM6A*

18.1. chrX\_44873709\_CAGGTACG/-

| SampleID  | Variants (GRCh38)        | Ref_depth | Alt_depth | Gene         | Consequence          |
|-----------|--------------------------|-----------|-----------|--------------|----------------------|
| 112301098 | chrX_44873709_CAGGTACG/- | 47        | 2         | <i>KDM6A</i> | splice_donor_variant |

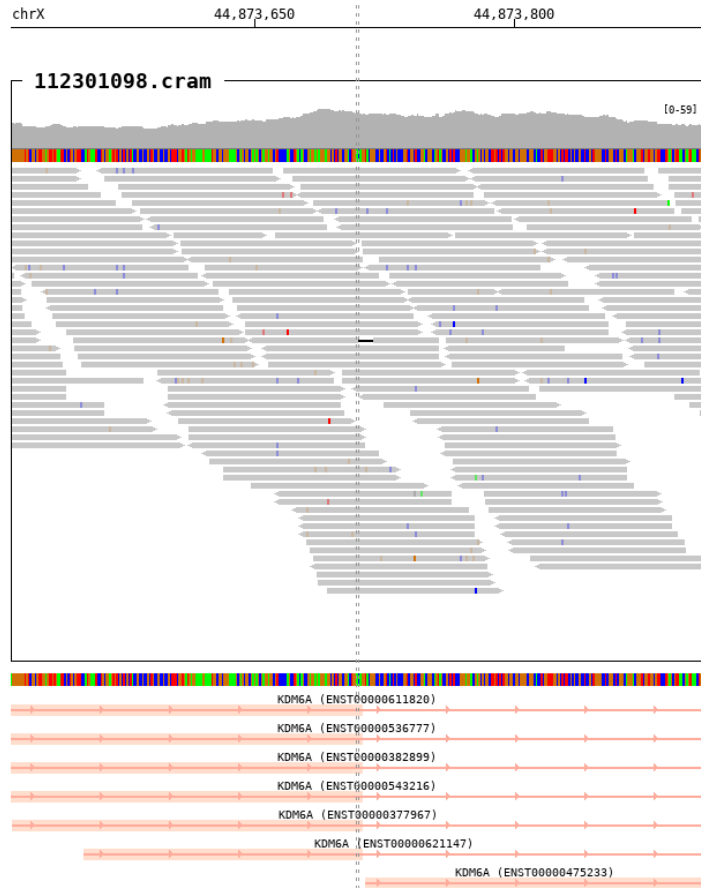

18.2. chrX\_45051700\_TTCTTTAGAGGAAATATCAT/-

| SampleID  | Variants (GRCh38)                        | Ref_depth | Alt_depth | Gene  | Consequence             |
|-----------|------------------------------------------|-----------|-----------|-------|-------------------------|
| 112301169 | chrX_45051700_TTCTTTAGA<br>GGAAATATCAT/- | 28        | 2         | KDM6A | splice_acceptor_variant |

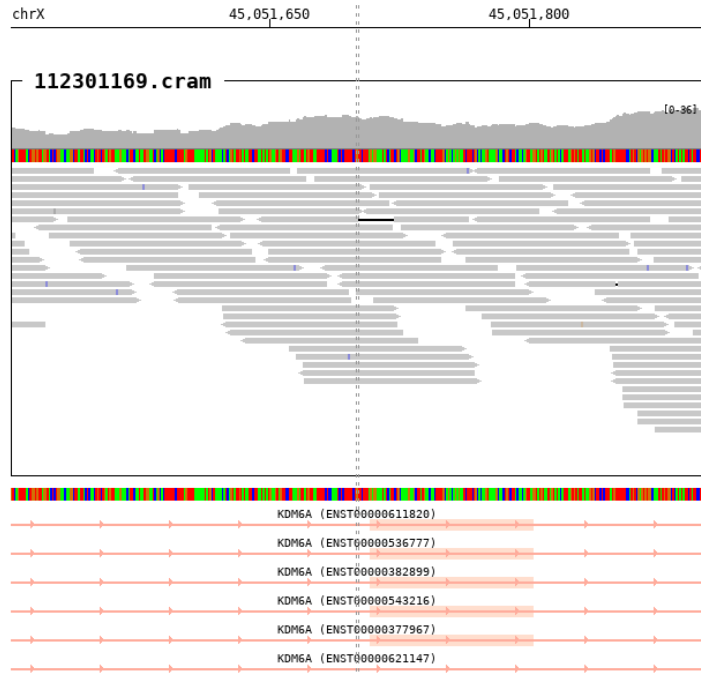

18.3. chrX\_45085873\_AAAAT/-

| SampleID  | Variants (GRCh38)     | Ref_depth | Alt_depth | Gene  | Consequence        |
|-----------|-----------------------|-----------|-----------|-------|--------------------|
| 110105842 | chrX_45085873_AAAAT/- | 21        | 2         | KDM6A | frameshift_variant |

chrX 45,085,750 45,085,900 45,086,050

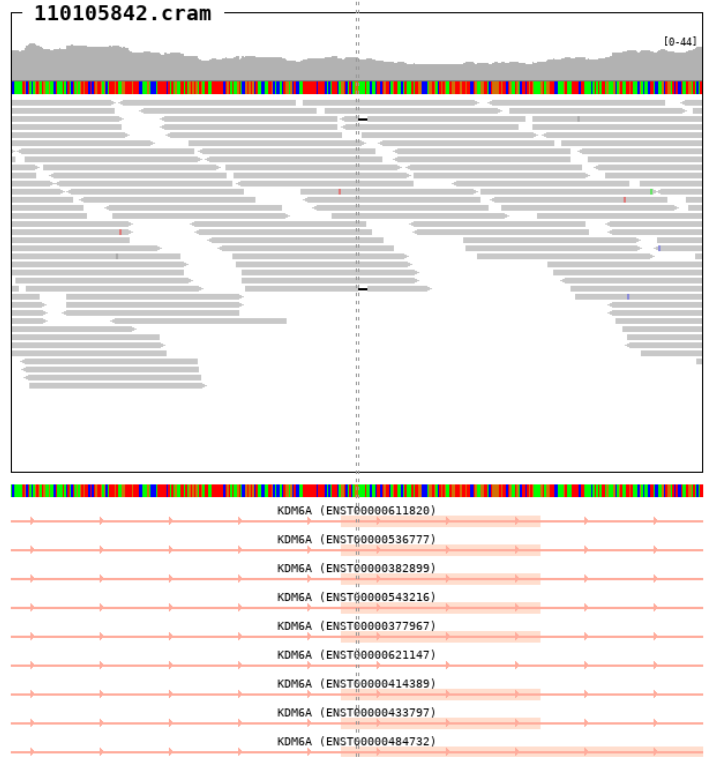

## 19. KMT2A

### 19.1. chr11\_118473113\_C/T

| SampleID   | Variants (GRCh38)   | Ref_depth | Alt_depth | Gene  | Consequence |
|------------|---------------------|-----------|-----------|-------|-------------|
| 4331231233 | chr11_118473113_C/T | 46        | 3         | KMT2A | stop_gained |

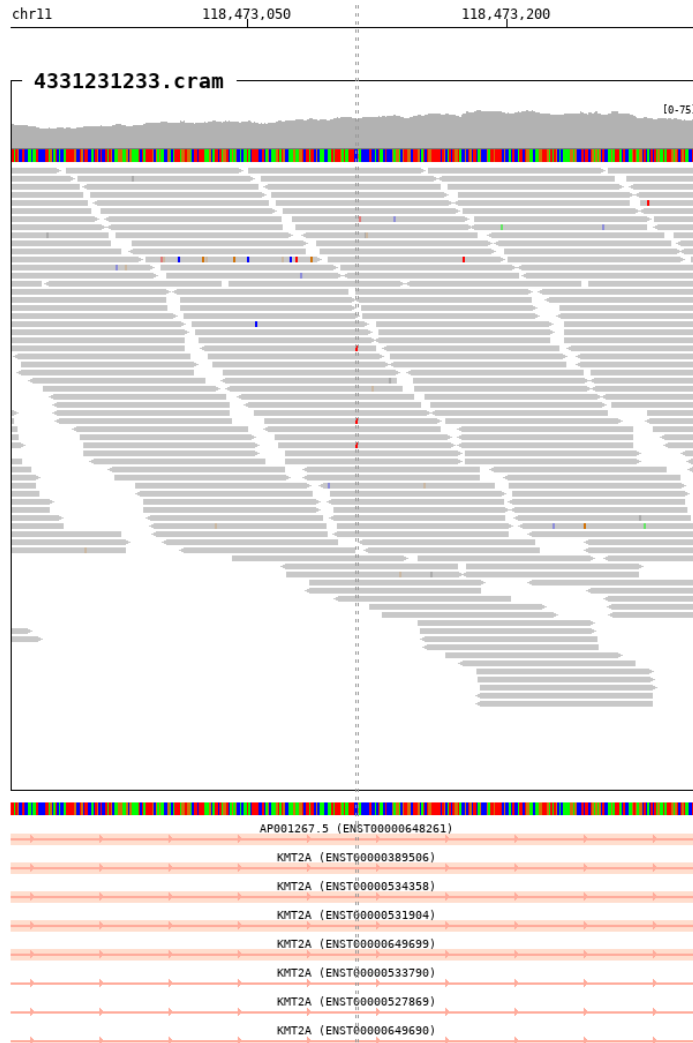

19.2. chr11\_118472981\_C/T

| SampleID | Variants (GRCh38)   | Ref_depth | Alt_depth | Gene  | Consequence |
|----------|---------------------|-----------|-----------|-------|-------------|
| 10010452 | chr11_118472981_C/T | 28        | 6         | KMT2A | stop_gained |

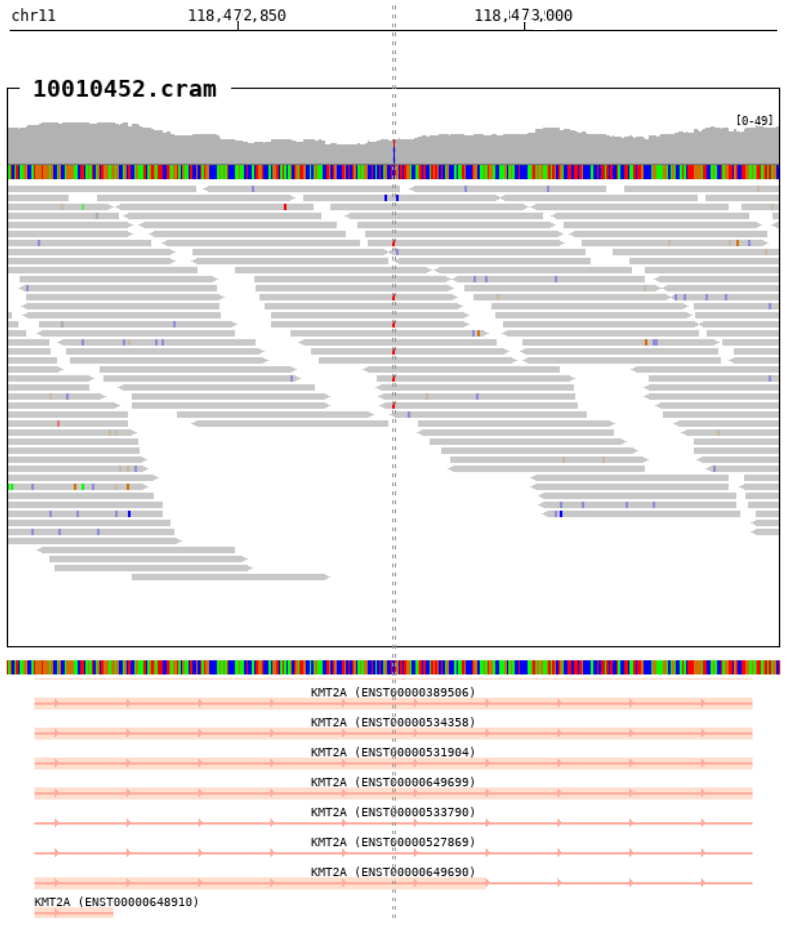

19.3. chr11\_118482432\_AGCAAAC/-

| SampleID  | Variants (GRCh38)         | Ref_depth | Alt_depth | Gene         | Consequence        |
|-----------|---------------------------|-----------|-----------|--------------|--------------------|
| 111104488 | chr11_118482432_AGCAAAC/- | 54        | 4         | <i>KMT2A</i> | frameshift_variant |

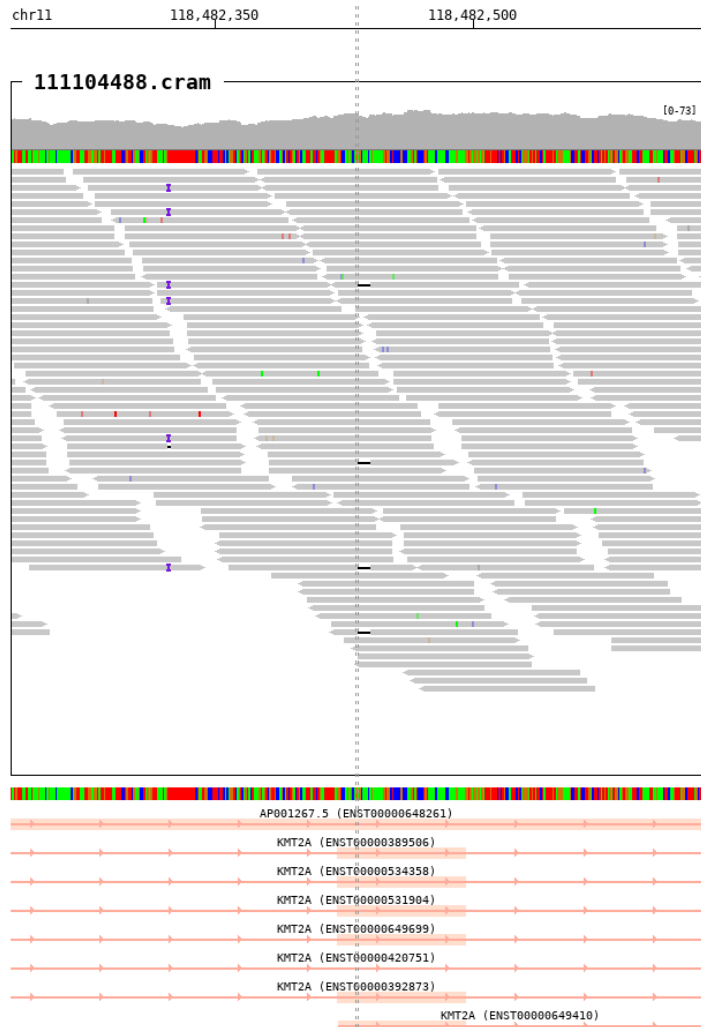

19.4. chr11\_118501780\_C/G

| SampleID  | Variants (GRCh38)   | Ref_depth | Alt_depth | Gene  | Consequence |
|-----------|---------------------|-----------|-----------|-------|-------------|
| 110104134 | chr11_118501780_C/G | 53        | 14        | KMT2A | stop_gained |

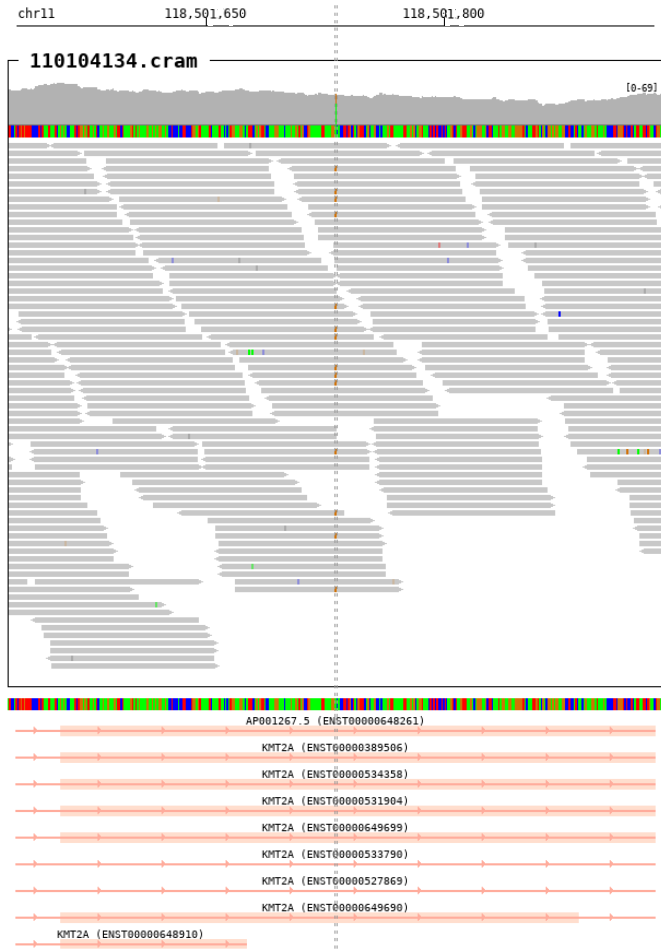

19.5. chr11\_118503327\_C/T

| SampleID | Variants (GRCh38)   | Ref_depth | Alt_depth | Gene         | Consequence |
|----------|---------------------|-----------|-----------|--------------|-------------|
| 12390177 | chr11_118503327_C/T | 32        | 4         | <i>KMT2A</i> | stop_gained |

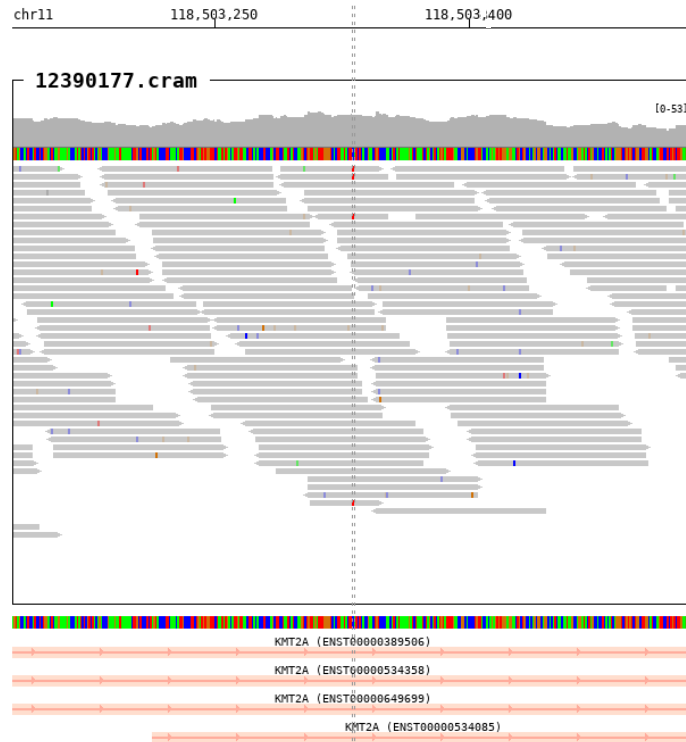

19.6. chr11\_118504291\_T/A

| SampleID  | Variants (GRCh38)   | Ref_depth | Alt_depth | Gene         | Consequence |
|-----------|---------------------|-----------|-----------|--------------|-------------|
| 102102712 | chr11_118504291_T/A | 36        | 12        | <i>KMT2A</i> | stop_gained |

chr11 118,504,150 118,504,300 118,504,450

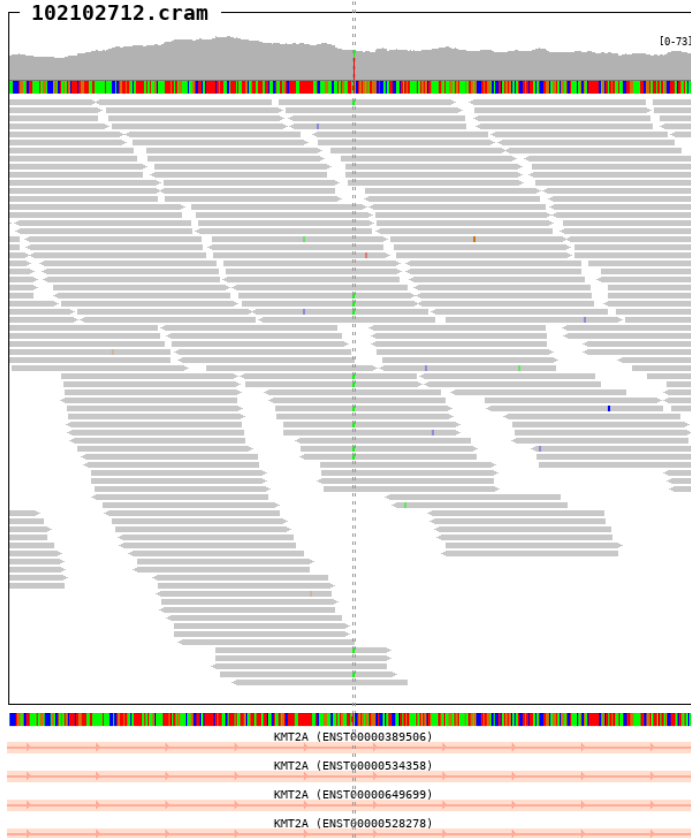

19.7. chr11\_118506409\_C/G

| SampleID | Variants (GRCh38)   | Ref_depth | Alt_depth | Gene  | Consequence |
|----------|---------------------|-----------|-----------|-------|-------------|
| 10013658 | chr11_118506409_C/G | 22        | 4         | KMT2A | stop_gained |

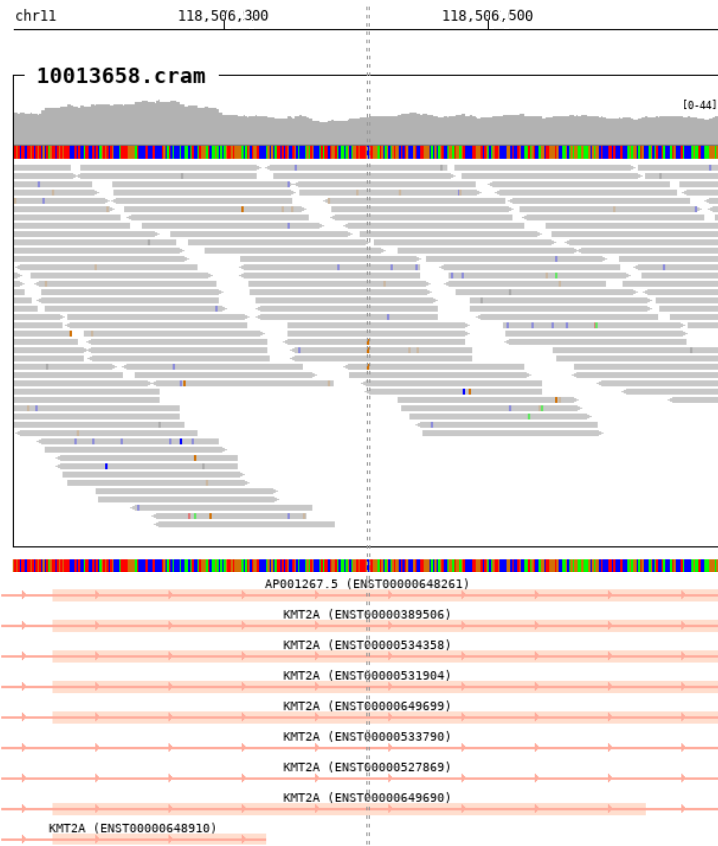

## 20. KMT2D

### 20.1. chr12\_49028035\_GCTCAGTGCCT/-

| SampleID   | Variants (GRCh38)            | Ref_depth | Alt_depth | Gene         | Consequence        |
|------------|------------------------------|-----------|-----------|--------------|--------------------|
| 102102382  | chr12_49028035_GCTCAGTGCCT/- | 46        | 3         | <i>KMT2D</i> | frameshift_variant |
| 112302013  | chr12_49028035_GCTCAGTGCCT/- | 40        | 4         | <i>KMT2D</i> | frameshift_variant |
| 112303742  | chr12_49028035_GCTCAGTGCCT/- | 35        | 5         | <i>KMT2D</i> | frameshift_variant |
| 112403915  | chr12_49028035_GCTCAGTGCCT/- | 25        | 3         | <i>KMT2D</i> | frameshift_variant |
| 1201061146 | chr12_49028035_GCTCAGTGCCT/- | 39        | 3         | <i>KMT2D</i> | frameshift_variant |
| 1202252316 | chr12_49028035_GCTCAGTGCCT/- | 30        | 3         | <i>KMT2D</i> | frameshift_variant |
| 1303022235 | chr12_49028035_GCTCAGTGCCT/- | 44        | 3         | <i>KMT2D</i> | frameshift_variant |
| 5401023125 | chr12_49028035_GCTCAGTGCCT/- | 39        | 3         | <i>KMT2D</i> | frameshift_variant |
| 5401023333 | chr12_49028035_GCTCAGTGCCT/- | 39        | 3         | <i>KMT2D</i> | frameshift_variant |
| 60076      | chr12_49028035_GCTCAGTGCCT/- | 26        | 3         | <i>KMT2D</i> | frameshift_variant |
| 102100137  | chr12_49028035_GCTCAGTGCCT/- | 46        | 5         | <i>KMT2D</i> | frameshift_variant |
| 102105394  | chr12_49028035_GCTCAGTGCCT/- | 36        | 4         | <i>KMT2D</i> | frameshift_variant |
| 112301159  | chr12_49028035_GCTCAGTGCCT/- | 83        | 11        | <i>KMT2D</i> | frameshift_variant |
| 102100162  | chr12_49028035_GCTCAGTGCCT/- | 40        | 4         | <i>KMT2D</i> | frameshift_variant |

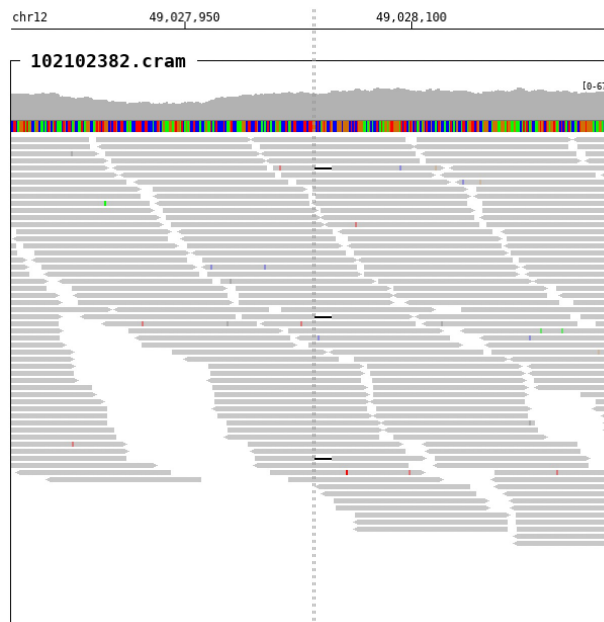

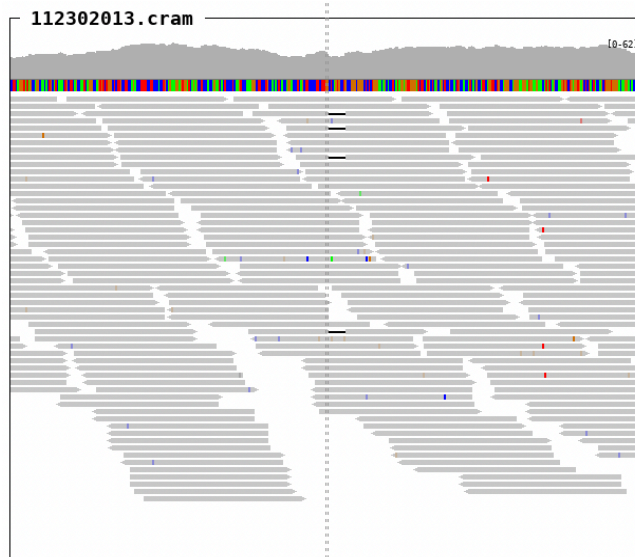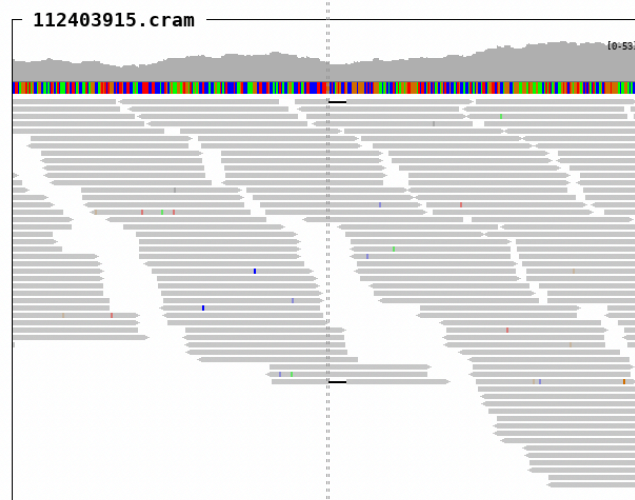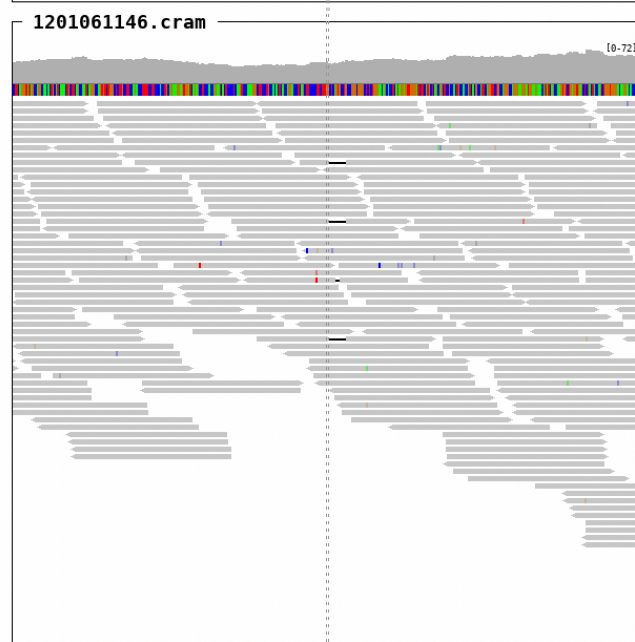

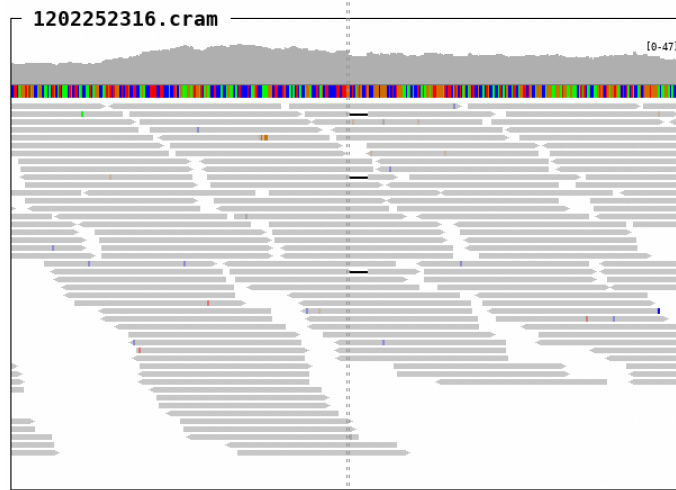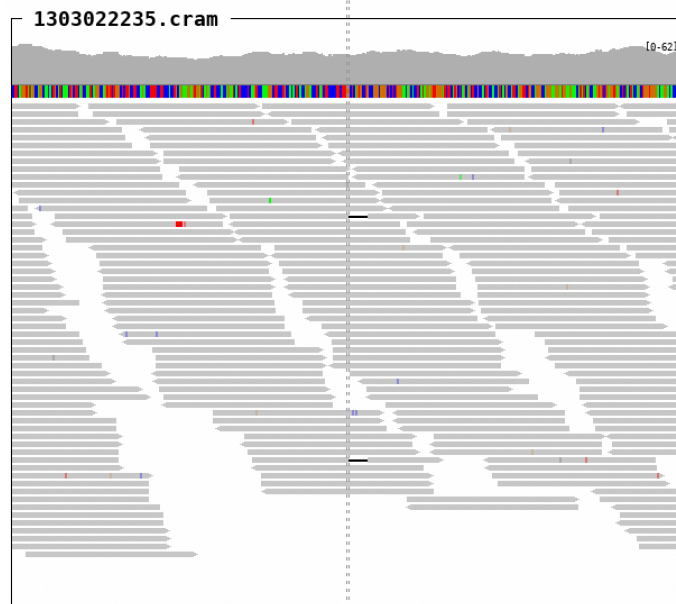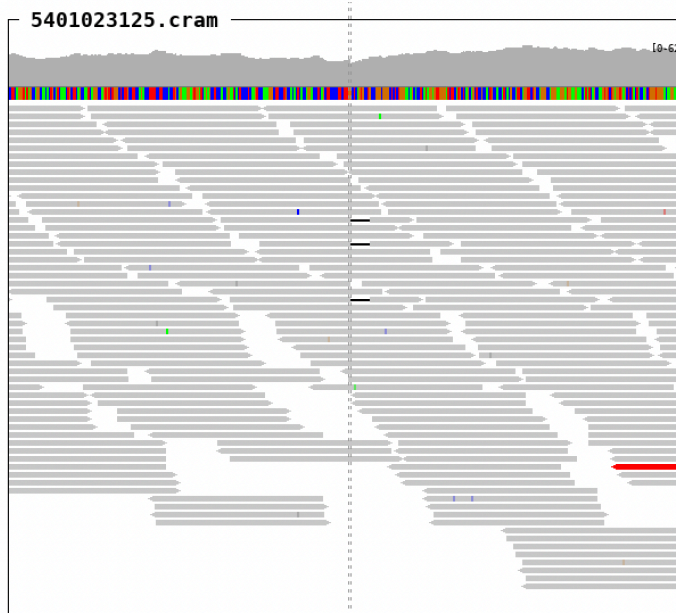

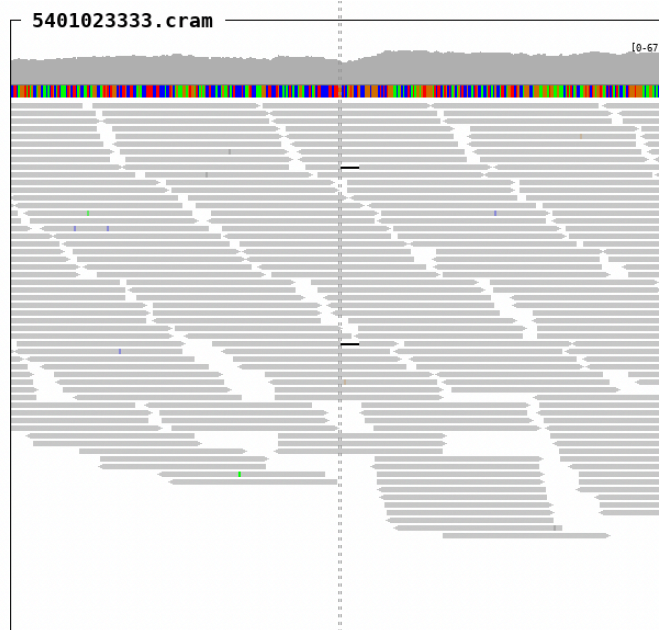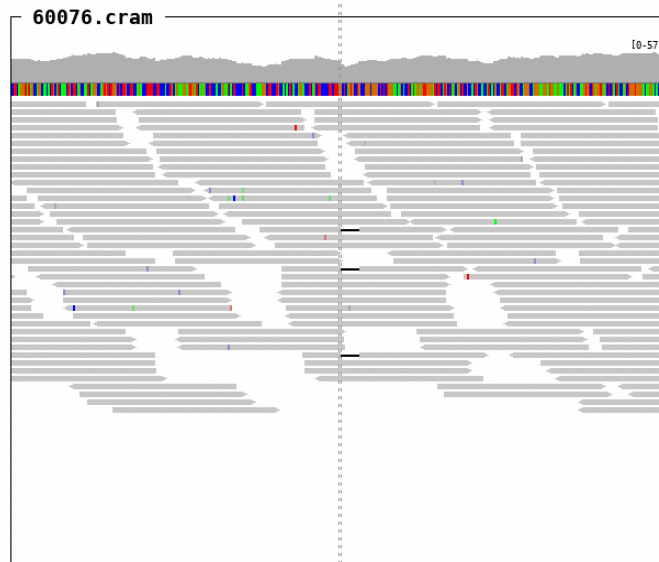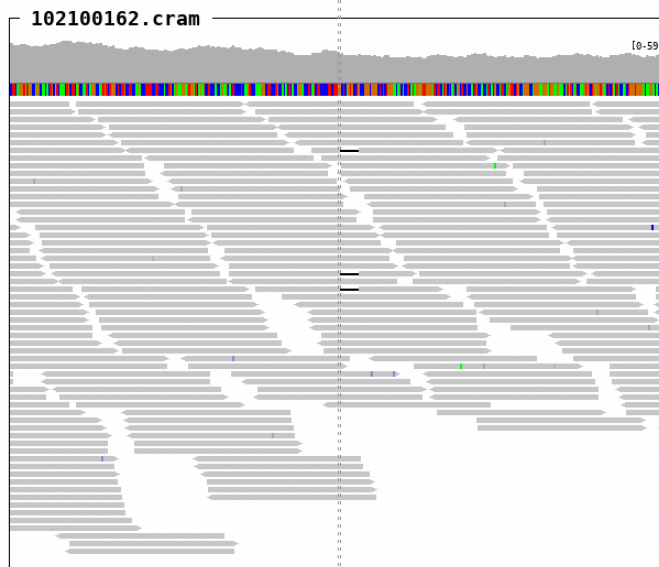

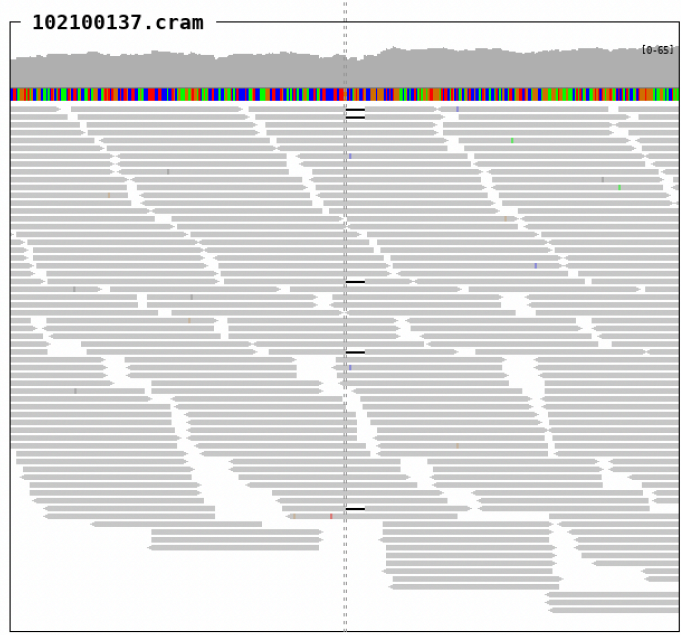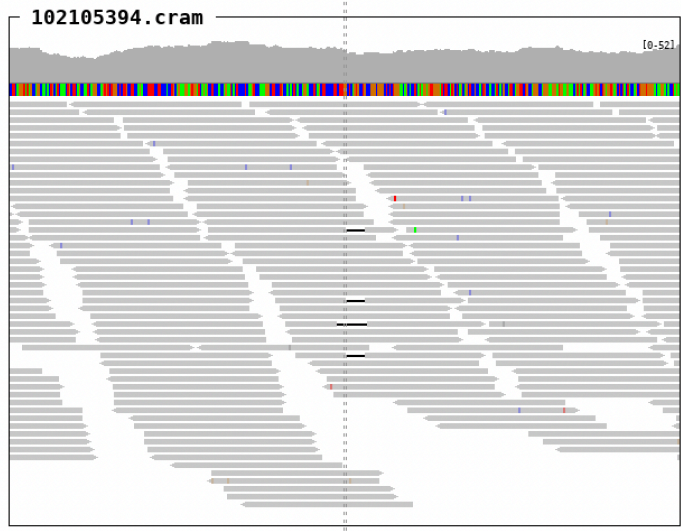

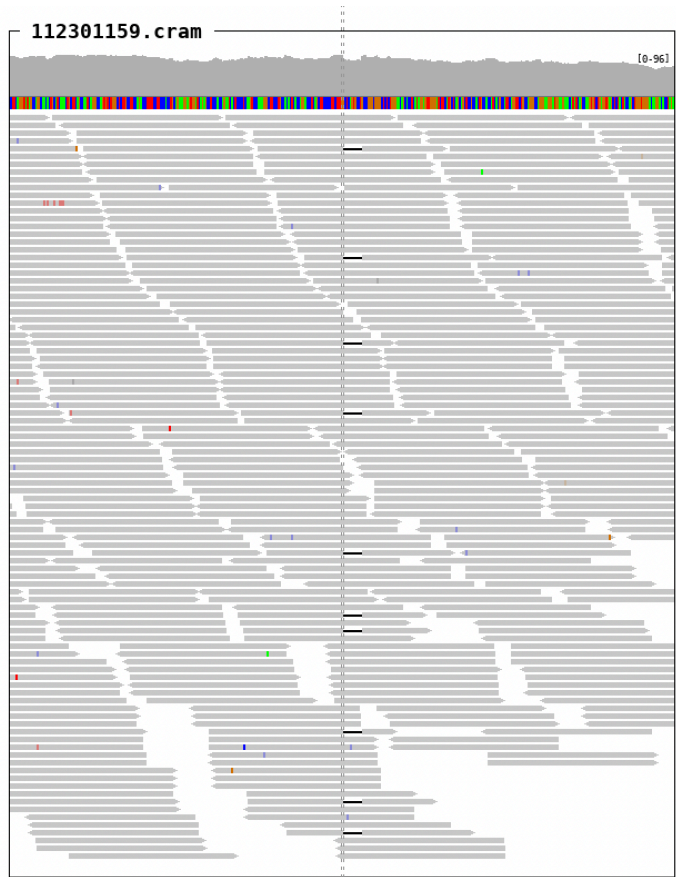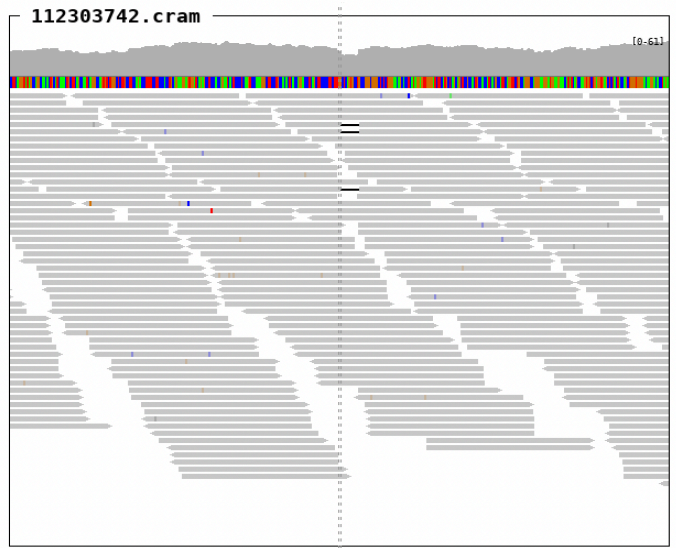

KMT2D (ENST00000301067)

20.2. chr12\_49032531\_ATTG/-

| SampleID  | Variants (GRCh38)     | Ref_depth | Alt_depth | Gene         | Consequence        |
|-----------|-----------------------|-----------|-----------|--------------|--------------------|
| 100609887 | chr12_49032531_ATTG/- | 49        | 5         | <i>KMT2D</i> | frameshift_variant |
| 112302710 | chr12_49032531_ATTG/- | 41        | 3         | <i>KMT2D</i> | frameshift_variant |

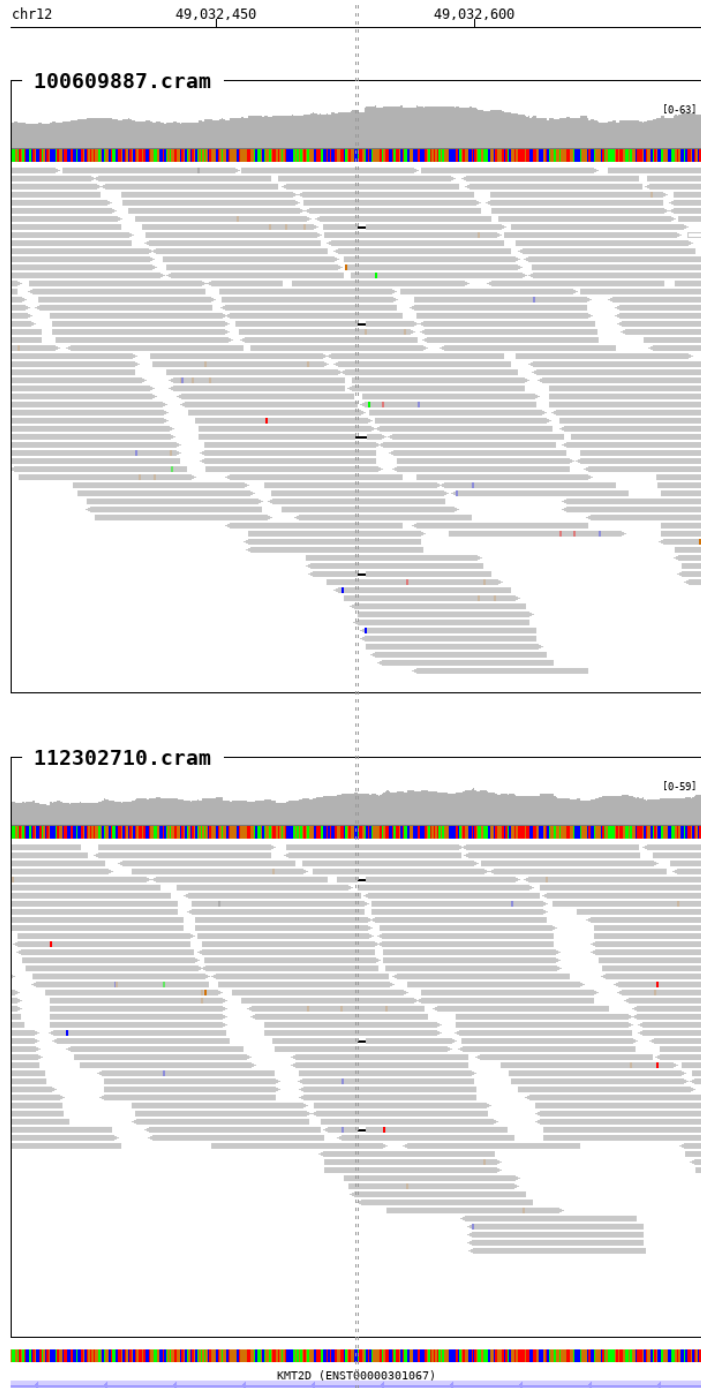

20.3. chr12\_49033620\_G/-

| SampleID   | Variants (GRCh38)  | Ref_depth | Alt_depth | Gene         | Consequence        |
|------------|--------------------|-----------|-----------|--------------|--------------------|
| 2224053102 | chr12_49033620_G/- | 44        | 4         | <i>KMT2D</i> | frameshift_variant |

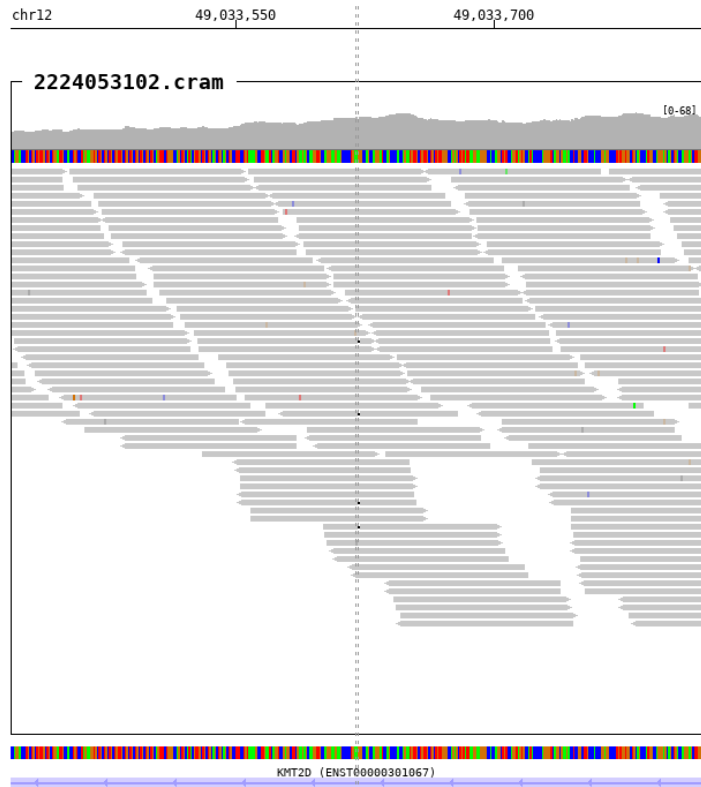

20.4. chr12\_49039304\_-/CCATCCTGGGG

| SampleID  | Variants (GRCh38)            | Ref_depth | Alt_depth | Gene         | Consequence        |
|-----------|------------------------------|-----------|-----------|--------------|--------------------|
| 110106546 | chr12_49039304_-/CCATCCTGGGG | 31        | 2         | <i>KMT2D</i> | frameshift_variant |

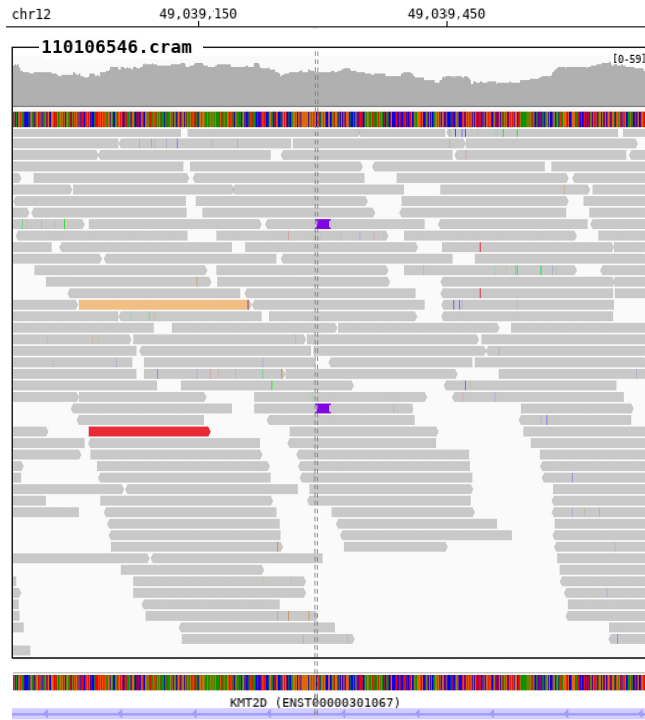

20.5. chr12\_49040152\_G/A

| SampleID  | Variants (GRCh38)  | Ref_depth | Alt_depth | Gene         | Consequence |
|-----------|--------------------|-----------|-----------|--------------|-------------|
| 101605153 | chr12_49040152_G/A | 31        | 5         | <i>KMT2D</i> | stop_gained |

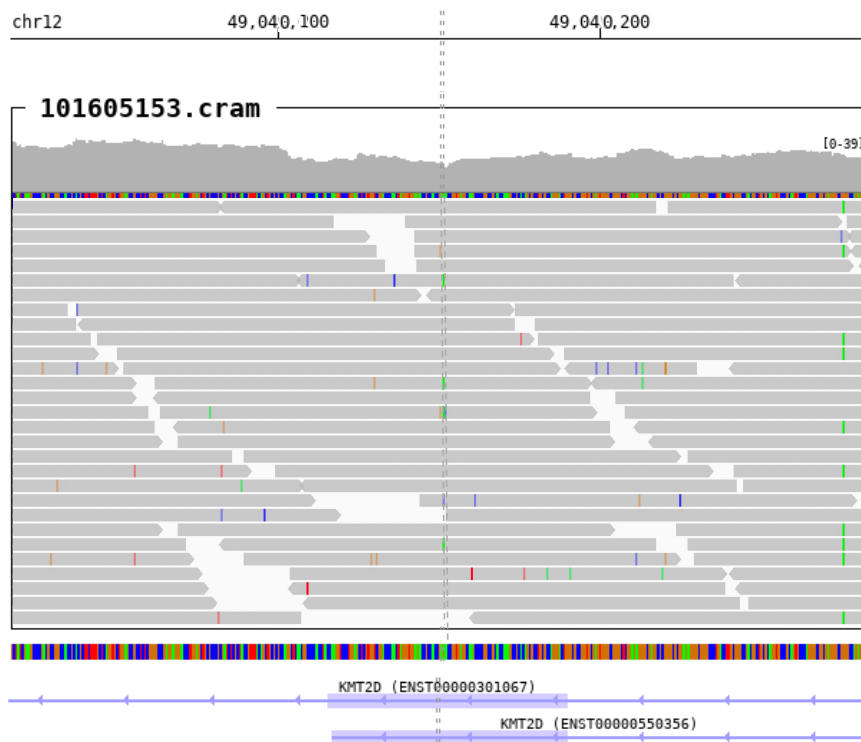

20.6. chr12\_49041103\_CTGGC/-

| SampleID  | Variants (GRCh38)      | Ref_depth | Alt_depth | Gene         | Consequence        |
|-----------|------------------------|-----------|-----------|--------------|--------------------|
| 112301146 | chr12_49041103_CTGGC/- | 54        | 2         | <i>KMT2D</i> | frameshift_variant |

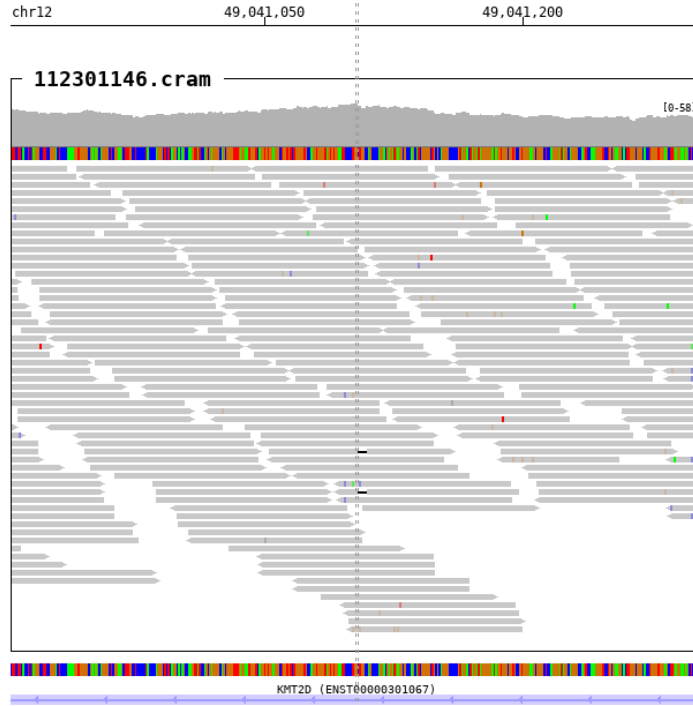

20.7. chr12\_49043126\_TGCCTGGCTTCTCAGGGTCACTGGGCACTGGGGA/-

| SampleID | Variants (GRCh38)                                   | Ref_depth | Alt_depth | Gene         | Consequence        |
|----------|-----------------------------------------------------|-----------|-----------|--------------|--------------------|
| 12290136 | chr12_49043126_TGCCTGGCTTCTCAGGGTCACTGGGCACTGGGGA/- | 36        | 3         | <i>KMT2D</i> | frameshift_variant |

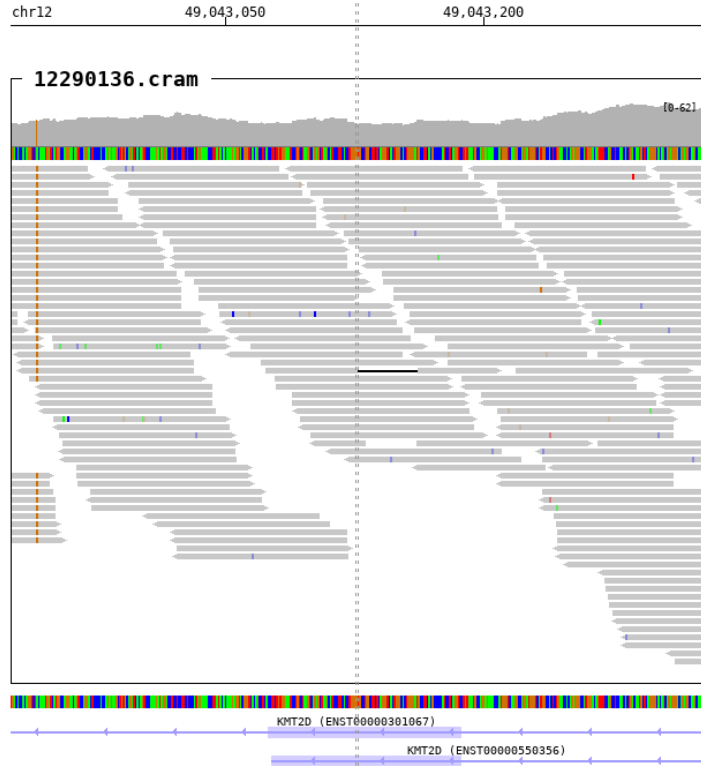

20.8. chr12\_49054394\_C/T

| SampleID | Variants (GRCh38)  | Ref_depth | Alt_depth | Gene         | Consequence |
|----------|--------------------|-----------|-----------|--------------|-------------|
| 61478    | chr12_49054394_C/T | 68        | 6         | <i>KMT2D</i> | stop_gained |

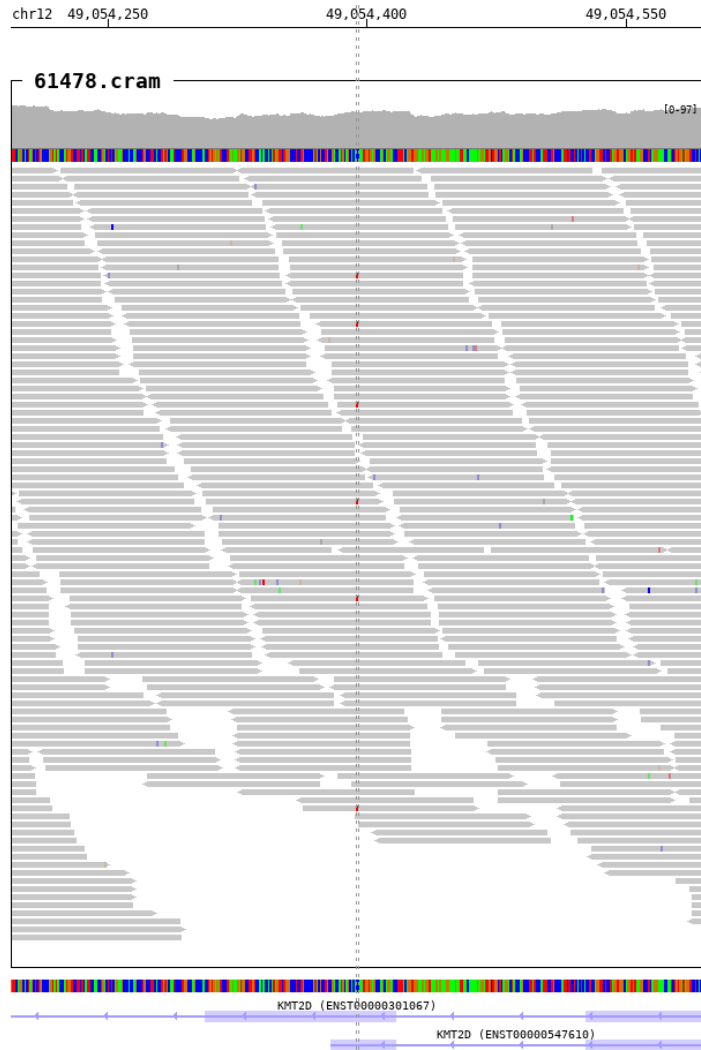

## 21. KRAS

### 21.1. chr12\_25245350\_C/A

| SampleID | Variants (GRCh38)  | Ref_depth | Alt_depth | Gene | Consequence      |
|----------|--------------------|-----------|-----------|------|------------------|
| 61048    | chr12_25245350_C/A | 38        | 5         | KRAS | missense_variant |

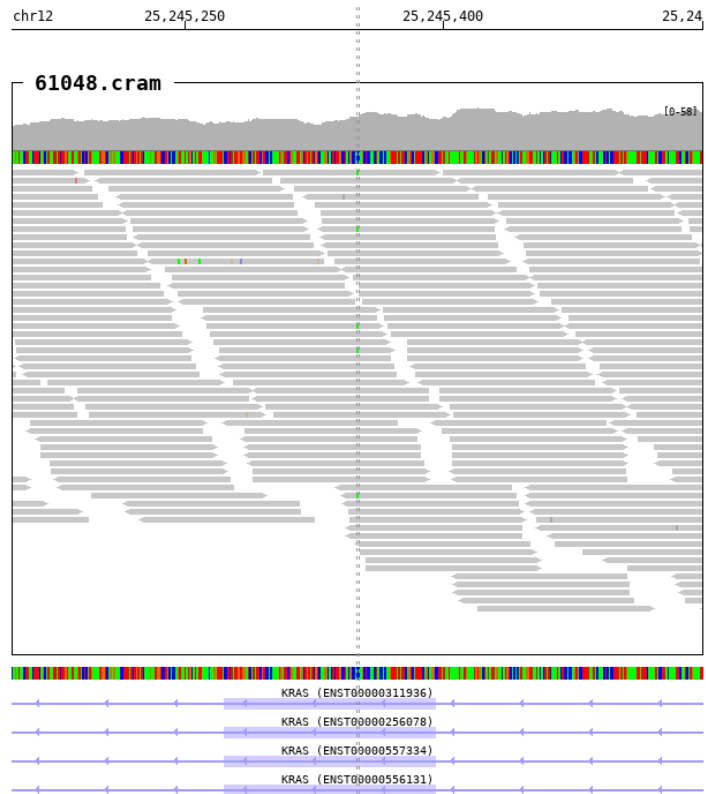

## 22. MPL

### 22.1. chr1\_43352639\_G/A

| SampleID  | Variants (GRCh38) | Ref_depth | Alt_depth | Gene | Consequence      |
|-----------|-------------------|-----------|-----------|------|------------------|
| 110106246 | chr1_43352639_G/A | 34        | 4         | MPL  | missense_variant |

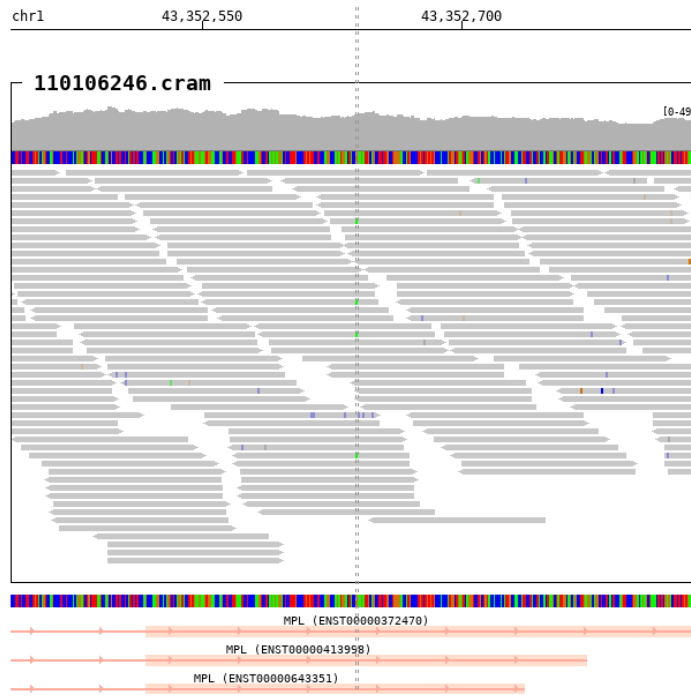

23. *NF1*

23.1. chr17\_31225195\_-/AATTACTACGTACA

| SampleID | Variants (GRCh38)               | Ref_depth | Alt_depth | Gene       | Consequence        |
|----------|---------------------------------|-----------|-----------|------------|--------------------|
| 10770637 | chr17_31225195_-/AATTACTACGTACA | 26        | 7         | <i>NF1</i> | frameshift_variant |

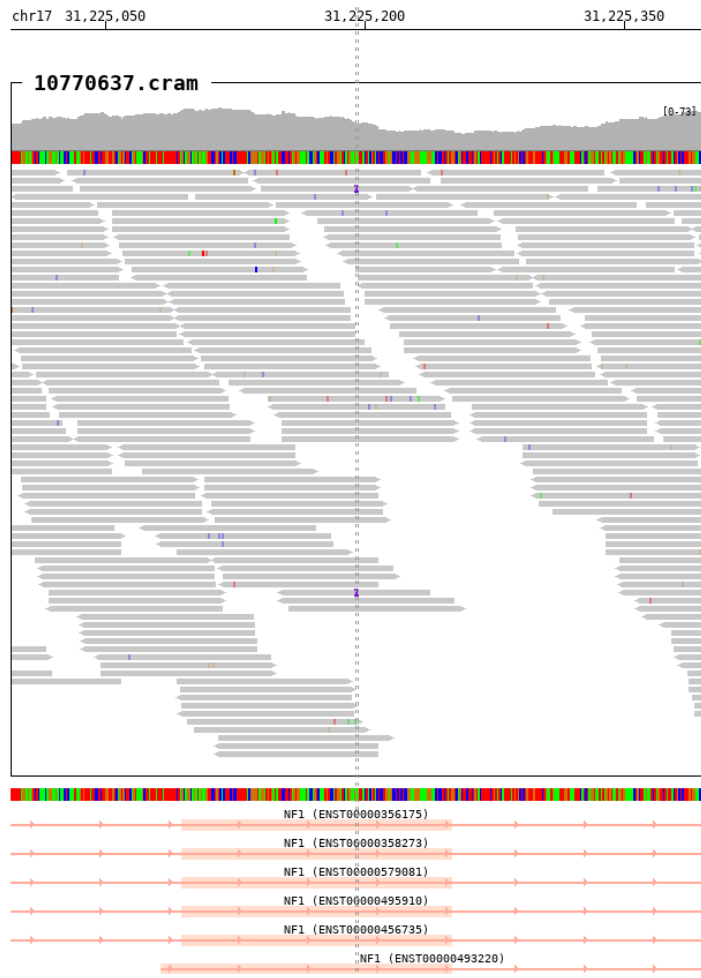

23.2. chr17\_31261810\_G/A

| SampleID  | Variants (GRCh38)  | Ref_depth | Alt_depth | Gene | Consequence |
|-----------|--------------------|-----------|-----------|------|-------------|
| 112403103 | chr17_31261810_G/A | 35        | 4         | NF1  | stop_gained |

chr17 31,261,750 31,261,900

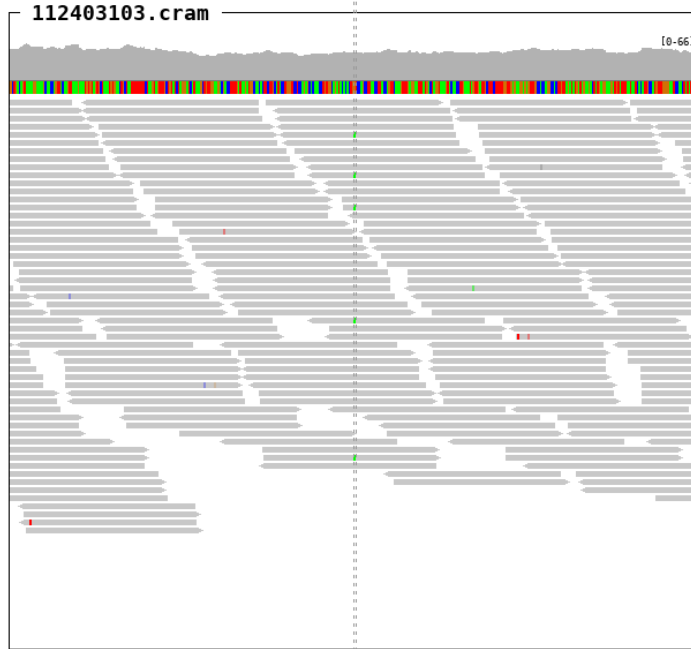

NF1 (ENST00000356175)  
 NF1 (ENST00000358273)  
 NF1 (ENST00000579081)  
 NF1 (ENST00000456735)  
 NF1 (ENST00000493220)  
 NF1 (ENST00000466819)  
 NF1 (ENST00000479614)

23.3. chr17\_31343098\_-/T

| SampleID   | Variants (GRCh38)  | Ref_depth | Alt_depth | Gene | Consequence        |
|------------|--------------------|-----------|-----------|------|--------------------|
| 3416224222 | chr17_31343098_-/T | 32        | 6         | NF1  | frameshift_variant |

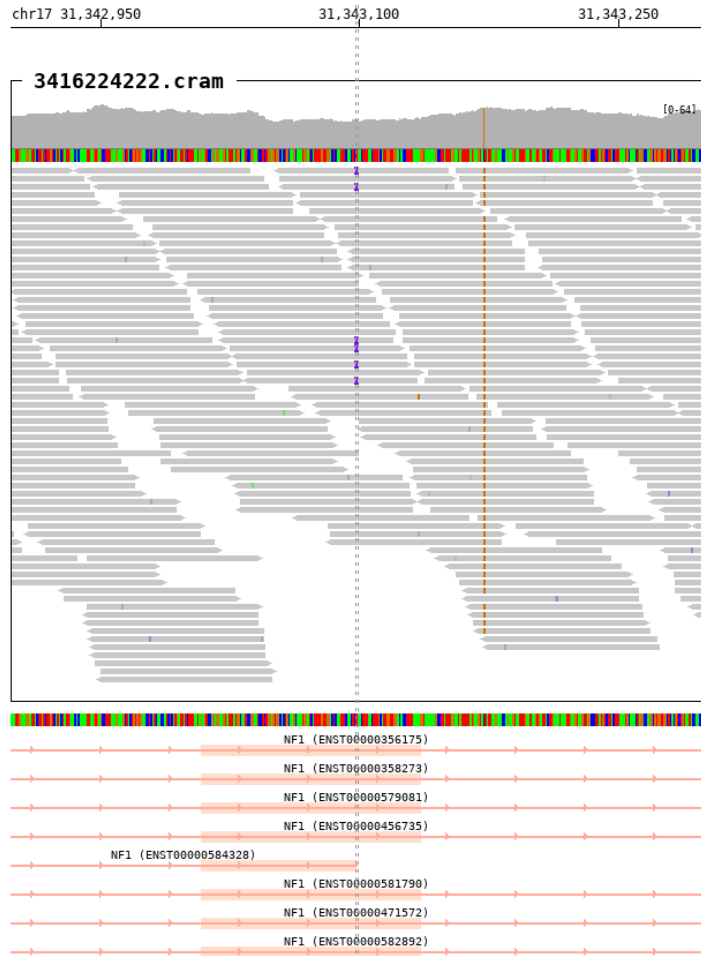

## 24. NRAS

### 24.1. chr1\_114716127\_C/T

| SampleID  | Variants (GRCh38)  | Ref_depth | Alt_depth | Gene | Consequence      |
|-----------|--------------------|-----------|-----------|------|------------------|
| 112402740 | chr1_114716127_C/T | 30        | 7         | NRAS | missense_variant |

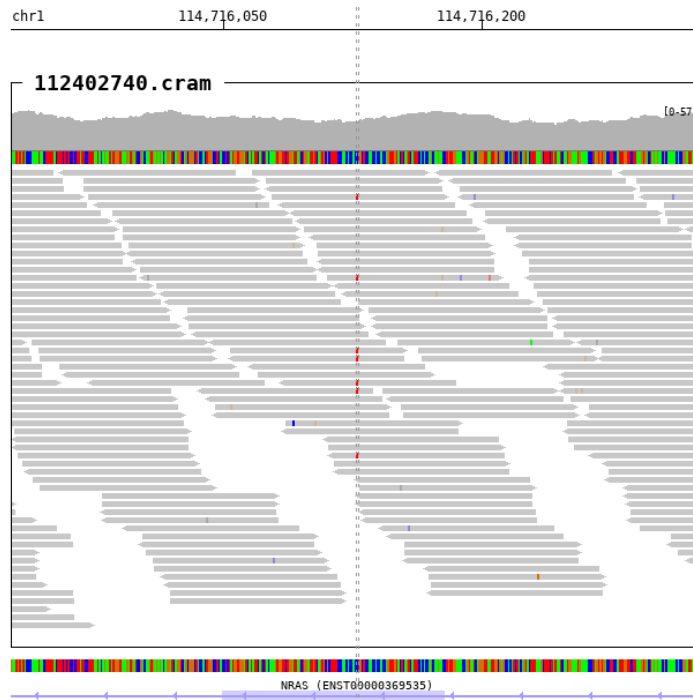

25. *PDS5B*

25.1. chr13\_32648775\_G/A

| SampleID   | Variants (GRCh38)  | Ref_depth | Alt_depth | Gene         | Consequence |
|------------|--------------------|-----------|-----------|--------------|-------------|
| 5401271136 | chr13_32648775_G/A | 35        | 8         | <i>PDS5B</i> | start_lost  |

chr13 32,648,650 32,648,800 32,648,950

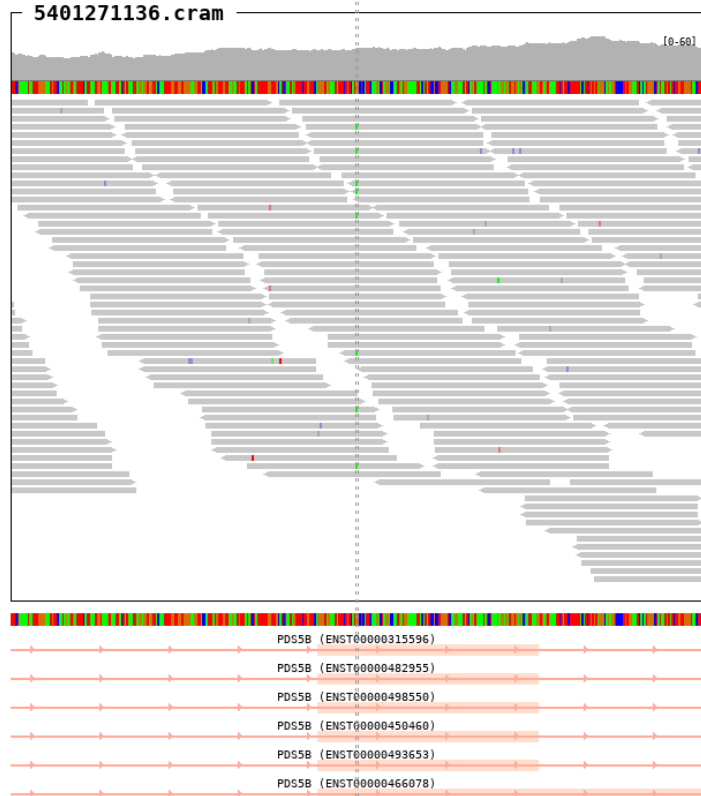

25.2. chr13\_32688526\_-/TGCT

| SampleID  | Variants (GRCh38)     | Ref_depth | Alt_depth | Gene         | Consequence        |
|-----------|-----------------------|-----------|-----------|--------------|--------------------|
| 110108204 | chr13_32688526_-/TGCT | 41        | 4         | <i>PDS5B</i> | frameshift_variant |

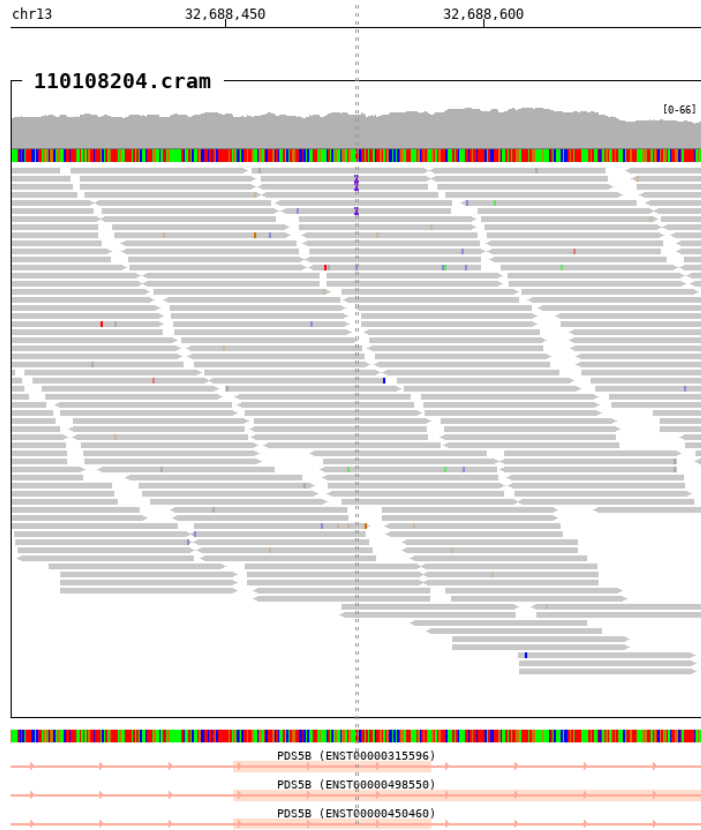

## 26. *PHIP*

### 26.1. chr6\_78965944\_C/T

| SampleID  | Variants (GRCh38) | Ref_depth | Alt_depth | Gene        | Consequence          |
|-----------|-------------------|-----------|-----------|-------------|----------------------|
| 110104073 | chr6_78965944_C/T | 27        | 3         | <i>PHIP</i> | splice_donor_variant |

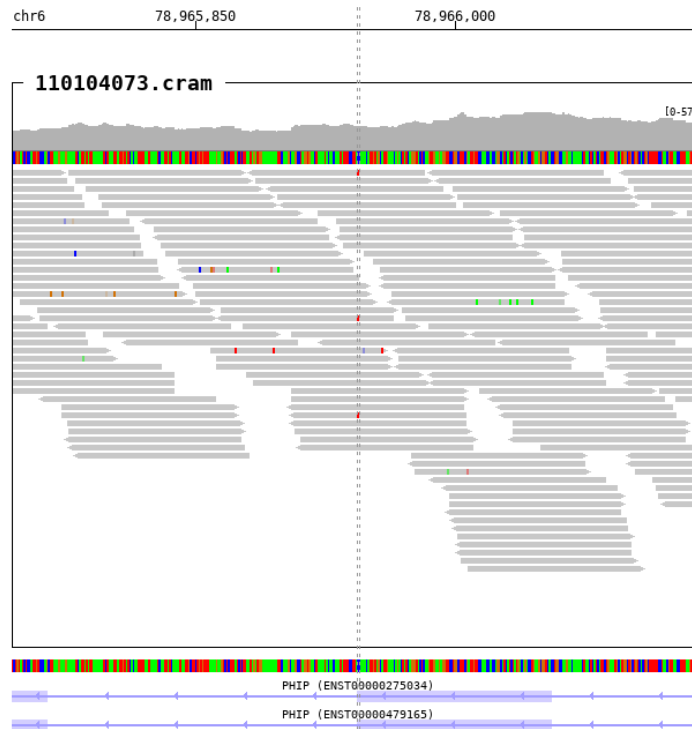

26.2. chr6\_79042911\_G/A

| SampleID  | Variants (GRCh38) | Ref_depth | Alt_depth | Gene        | Consequence |
|-----------|-------------------|-----------|-----------|-------------|-------------|
| 100602594 | chr6_79042911_G/A | 25        | 3         | <i>PHIP</i> | stop_gained |

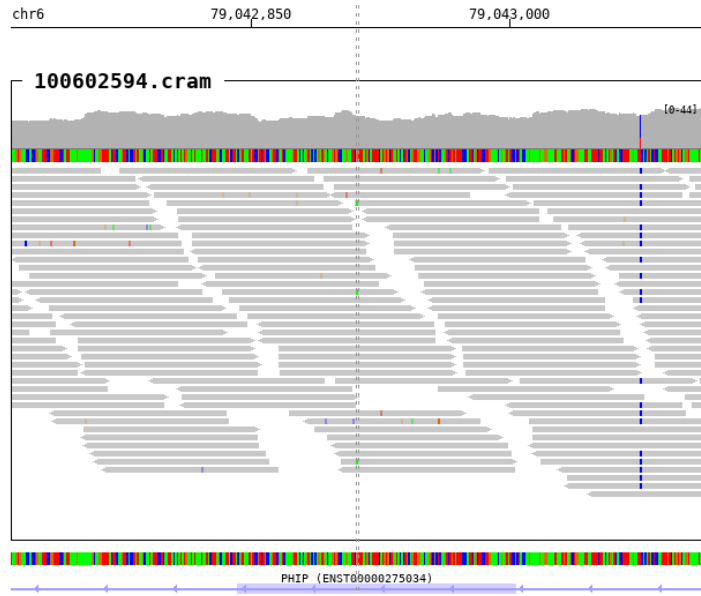

**27. PPM1D**

**27.1. chr17\_60663015\_G/A**

| SampleID  | Variants (GRCh38)  | Ref_depth | Alt_depth | Gene         | Consequence |
|-----------|--------------------|-----------|-----------|--------------|-------------|
| 101604048 | chr17_60663015_G/A | 39        | 5         | <i>PPM1D</i> | stop_gained |

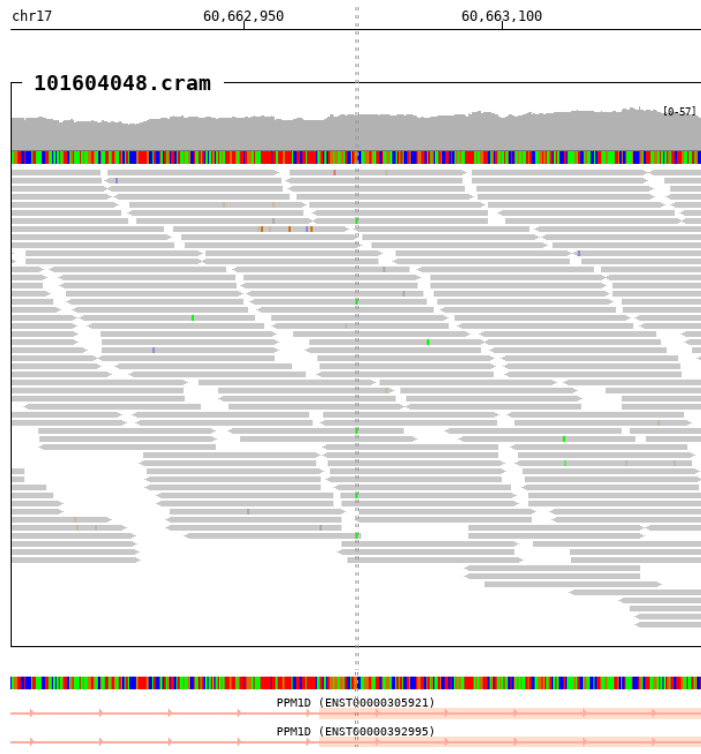

27.2. chr17\_60663015\_GC/AT

| SampleID | Variants (GRCh38)    | Ref_depth | Alt_depth | Gene         | Consequence |
|----------|----------------------|-----------|-----------|--------------|-------------|
| 11540212 | chr17_60663015_GC/AT | 37        | 6         | <i>PPM1D</i> | stop_gained |

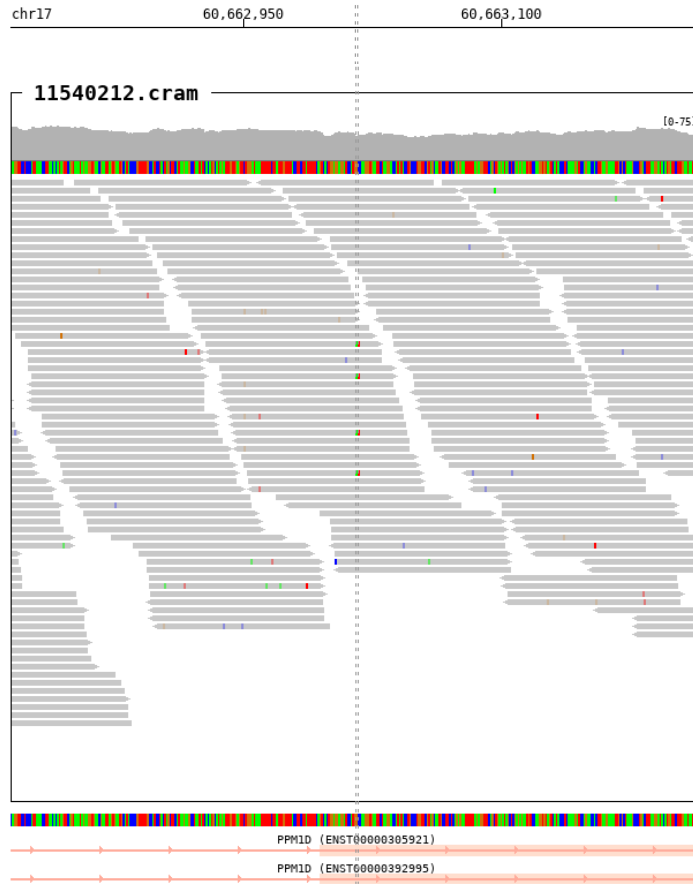

27.3. chr17\_60663092\_C/G

| SampleID   | Variants (GRCh38)  | Ref_depth | Alt_depth | Gene  | Consequence |
|------------|--------------------|-----------|-----------|-------|-------------|
| 1504232148 | chr17_60663092_C/G | 47        | 8         | PPM1D | stop_gained |

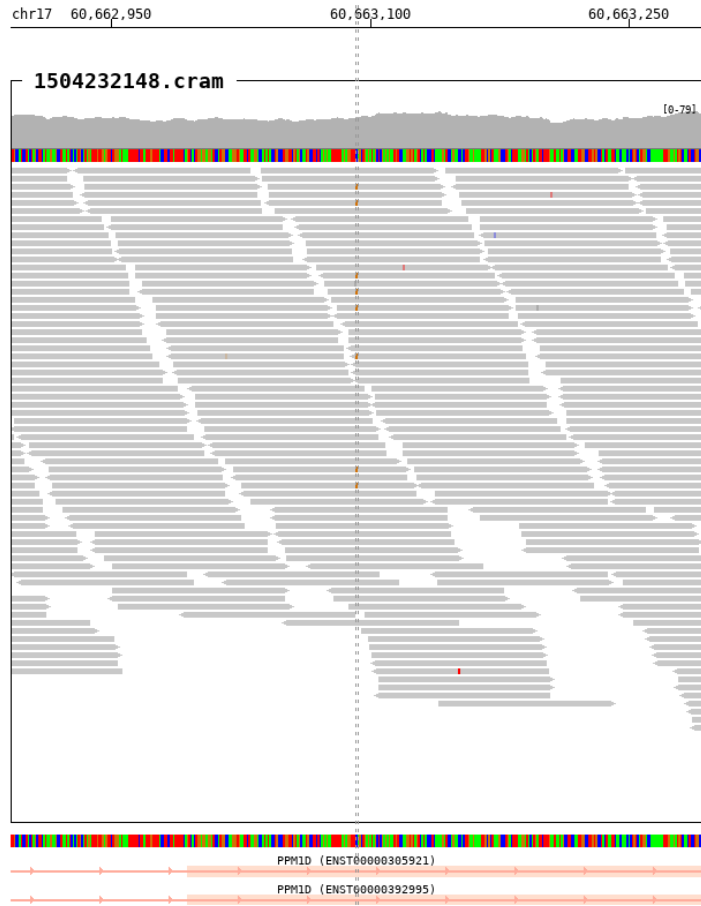

27.4. chr17\_60663169\_G/T

| SampleID | Variants (GRCh38)  | Ref_depth | Alt_depth | Gene  | Consequence      |
|----------|--------------------|-----------|-----------|-------|------------------|
| 63705    | chr17_60663169_G/T | 29        | 12        | PPM1D | missense_variant |

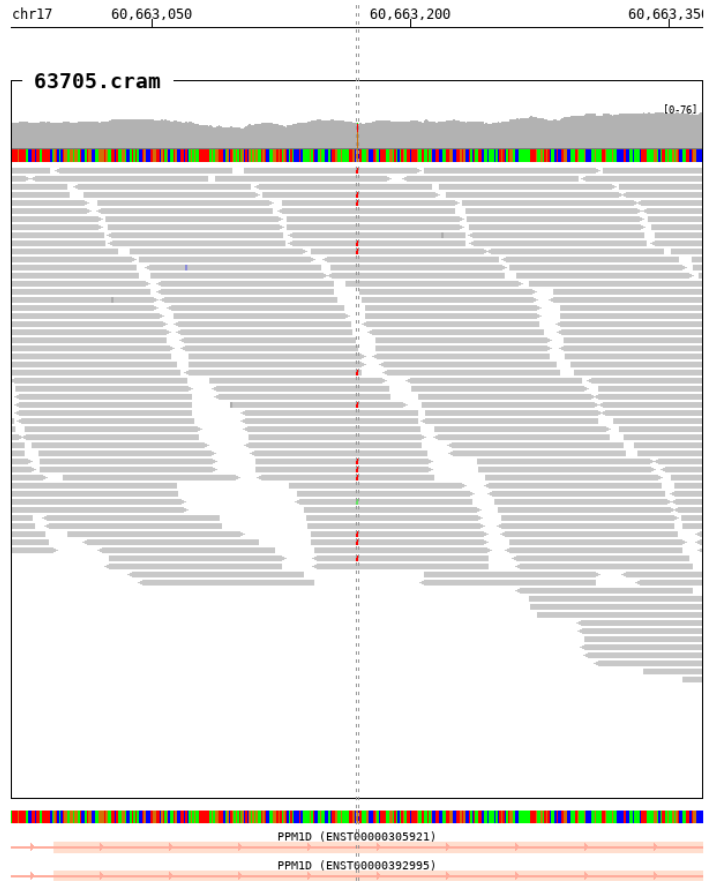

27.5. chr17\_60663181\_C/-

| SampleID | Variants (GRCh38)  | Ref_depth | Alt_depth | Gene         | Consequence        |
|----------|--------------------|-----------|-----------|--------------|--------------------|
| 10012447 | chr17_60663181_C/- | 37        | 5         | <i>PPM1D</i> | frameshift_variant |

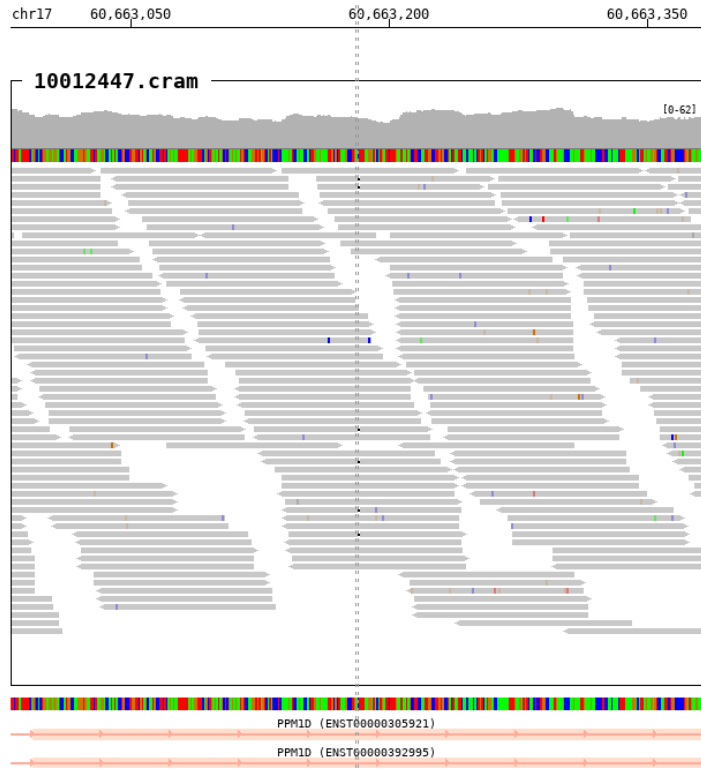

27.6. chr17\_60663200\_T/-

| SampleID  | Variants (GRCh38)  | Ref_depth | Alt_depth | Gene  | Consequence        |
|-----------|--------------------|-----------|-----------|-------|--------------------|
| 100600699 | chr17_60663200_T/- | 29        | 4         | PPM1D | frameshift_variant |

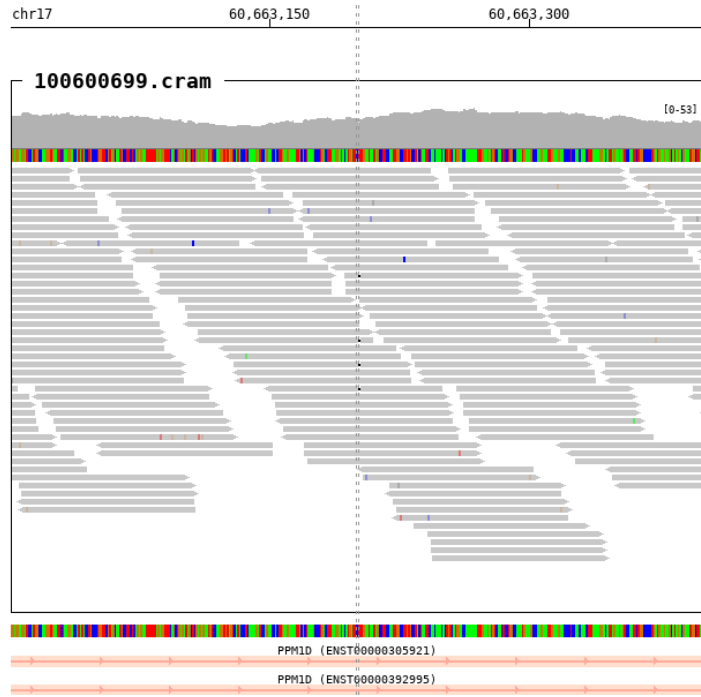

27.7. chr17\_60663290\_G/T

| SampleID | Variants (GRCh38)  | Ref_depth | Alt_depth | Gene  | Consequence      |
|----------|--------------------|-----------|-----------|-------|------------------|
| 60258    | chr17_60663290_G/T | 43        | 2         | PPM1D | missense_variant |

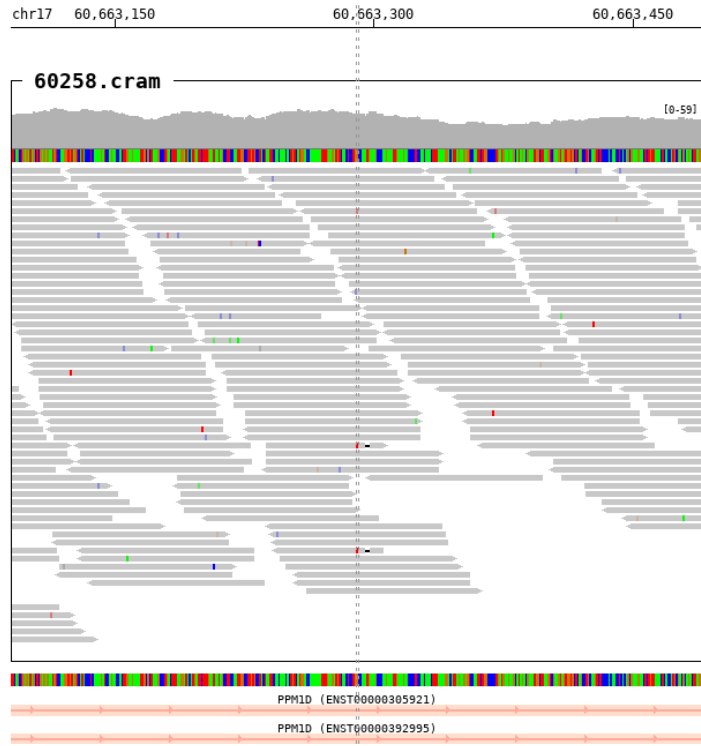

27.8. chr17\_60663333\_T/-

| SampleID | Variants (GRCh38)  | Ref_depth | Alt_depth | Gene         | Consequence        |
|----------|--------------------|-----------|-----------|--------------|--------------------|
| 10310640 | chr17_60663333_T/- | 43        | 6         | <i>PPM1D</i> | frameshift_variant |

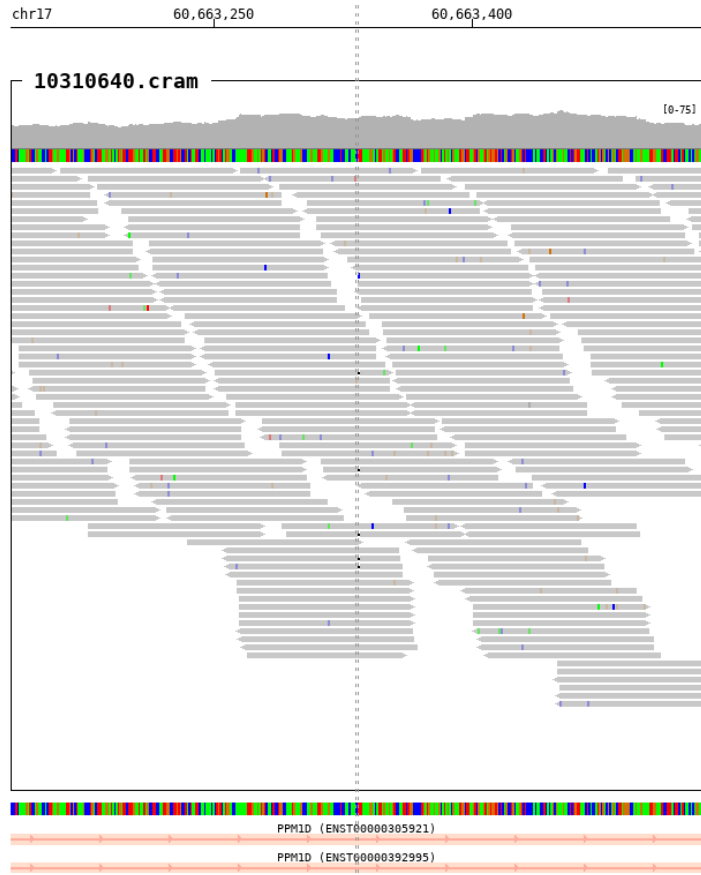

27.9. chr17\_60663352\_A/-

| SampleID | Variants (GRCh38)  | Ref_depth | Alt_depth | Gene  | Consequence        |
|----------|--------------------|-----------|-----------|-------|--------------------|
| 68878    | chr17_60663352_A/- | 59        | 4         | PPM1D | frameshift_variant |

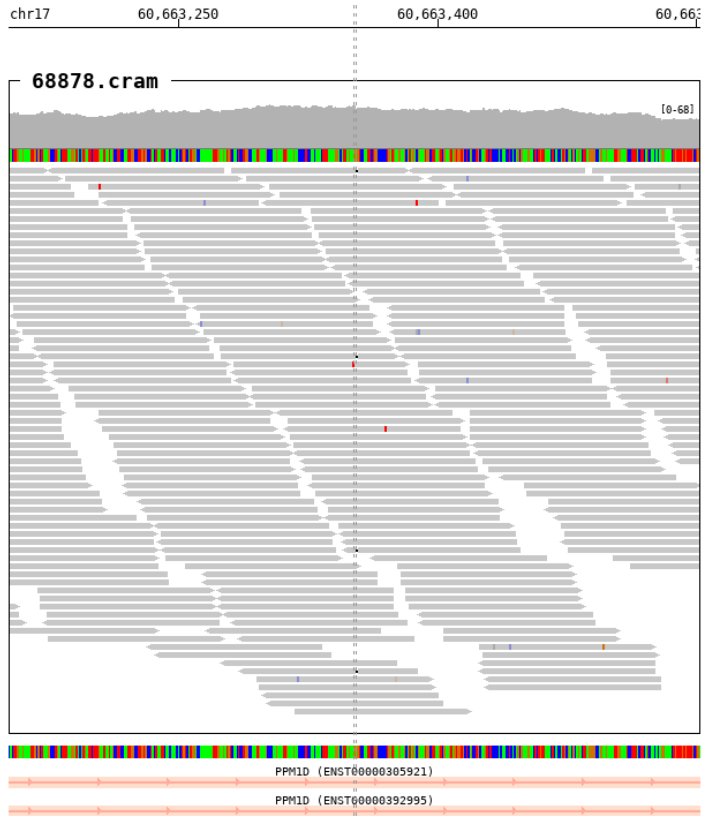

27.10. chr17\_60663388\_C/T

| SampleID  | Variants (GRCh38)  | Ref_depth | Alt_depth | Gene         | Consequence |
|-----------|--------------------|-----------|-----------|--------------|-------------|
| 100600152 | chr17_60663388_C/T | 29        | 4         | <i>PPM1D</i> | stop_gained |
| 112301496 | chr17_60663388_C/T | 48        | 4         | <i>PPM1D</i> | stop_gained |

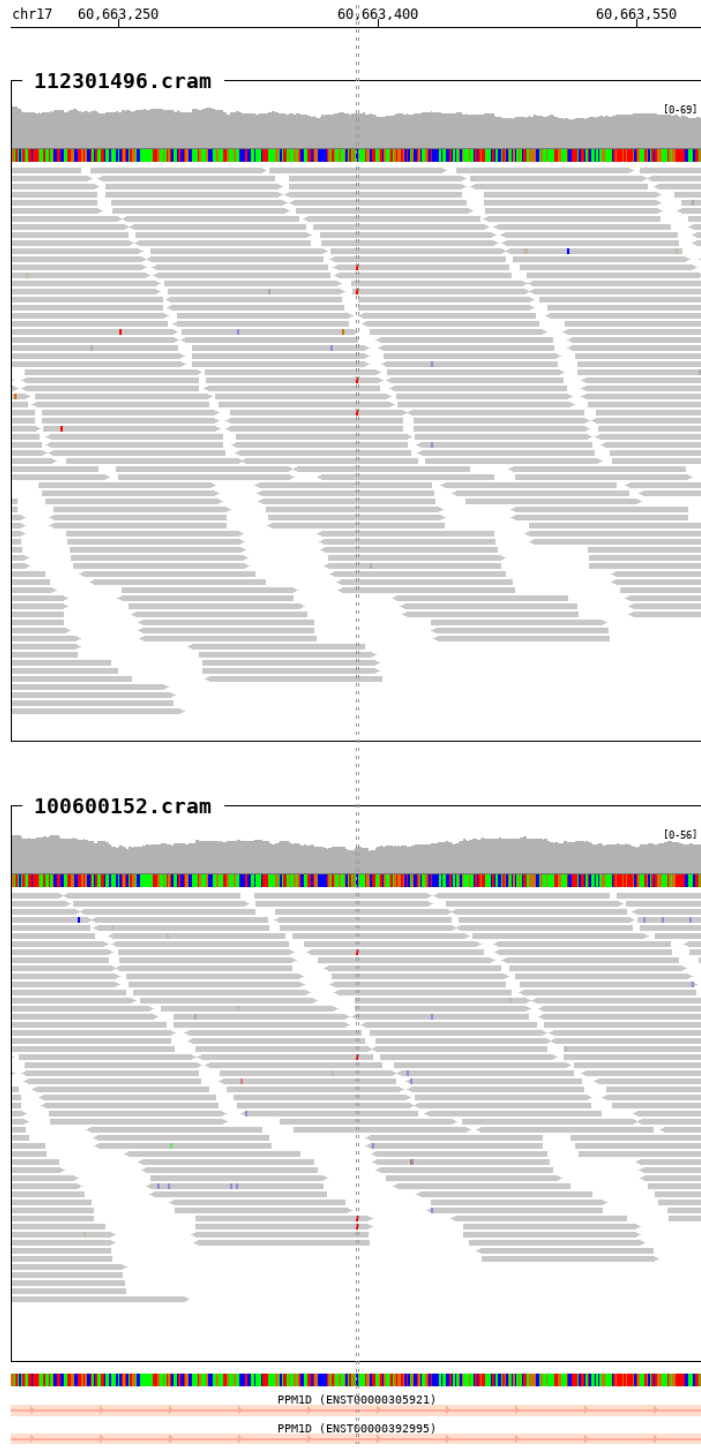

27.11. chr17\_60663448\_C/T

| SampleID | Variants (GRCh38)  | Ref_depth | Alt_depth | Gene         | Consequence |
|----------|--------------------|-----------|-----------|--------------|-------------|
| 10511959 | chr17_60663448_C/T | 64        | 7         | <i>PPM1D</i> | stop_gained |

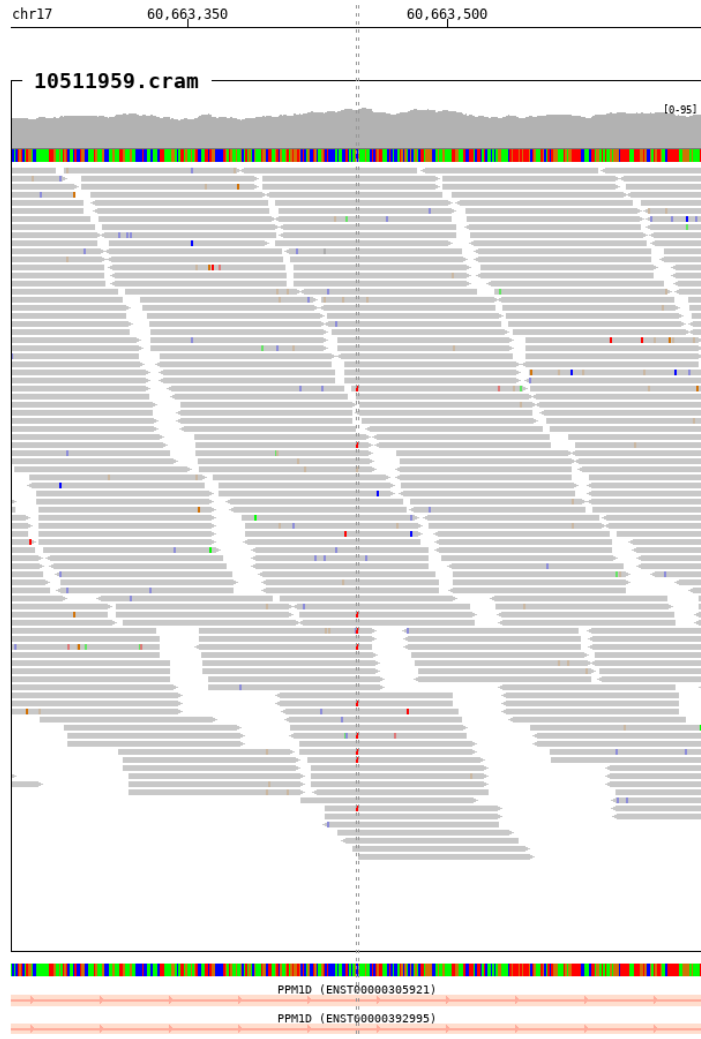

## 28. PRPF8

### 28.1. chr17\_1659994\_T/A

| SampleID | Variants (GRCh38) | Ref_depth | Alt_depth | Gene  | Consequence      |
|----------|-------------------|-----------|-----------|-------|------------------|
| 11311025 | chr17_1659994_T/A | 37        | 5         | PRPF8 | missense_variant |

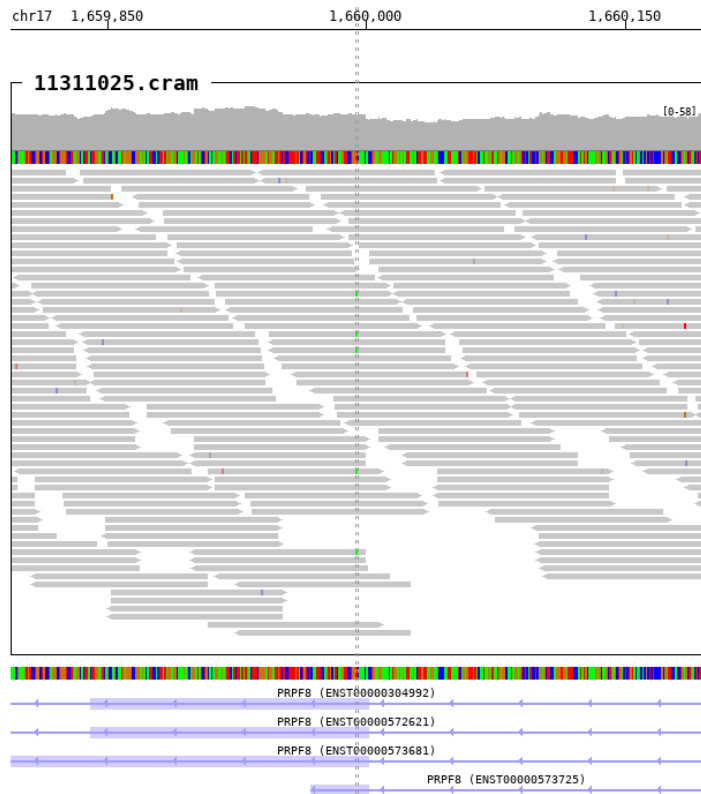

28.2. chr17\_1659995\_C/T

| SampleID | Variants (GRCh38) | Ref_depth | Alt_depth | Gene  | Consequence      |
|----------|-------------------|-----------|-----------|-------|------------------|
| 10511991 | chr17_1659995_C/T | 33        | 6         | PRPF8 | missense_variant |

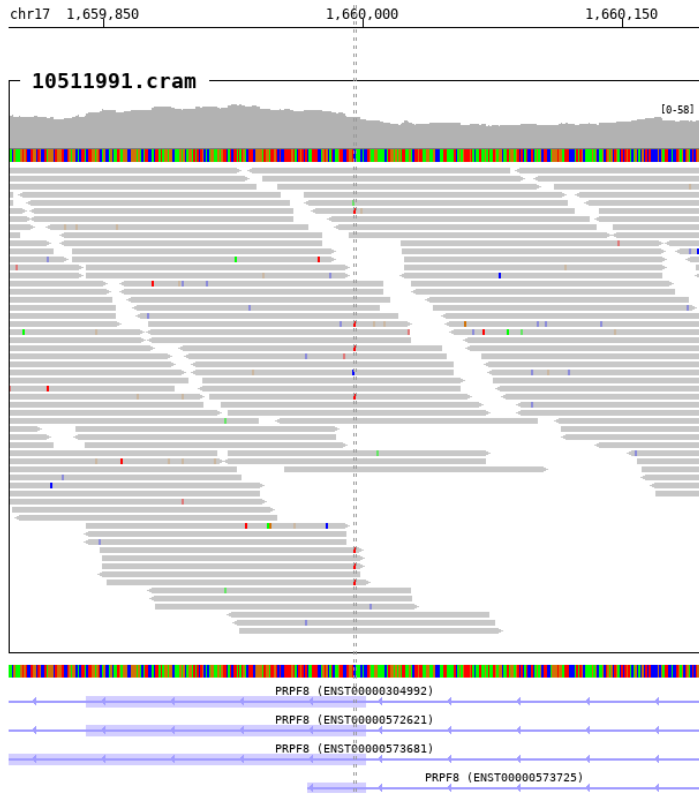

## 29. SETD2

### 29.1. chr3\_47086252\_C/T

| SampleID | Variants (GRCh38) | Ref_depth | Alt_depth | Gene  | Consequence |
|----------|-------------------|-----------|-----------|-------|-------------|
| 66094    | chr3_47086252_C/T | 40        | 7         | SETD2 | stop_gained |

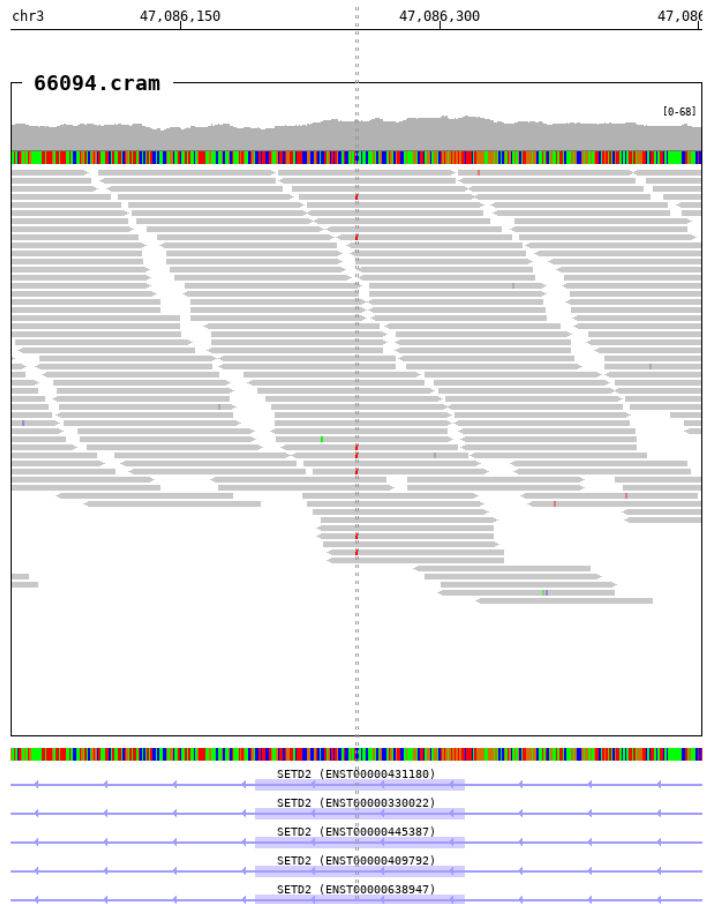

29.2. chr3\_47106062\_G/A

| SampleID  | Variants (GRCh38) | Ref_depth | Alt_depth | Gene  | Consequence |
|-----------|-------------------|-----------|-----------|-------|-------------|
| 101609826 | chr3_47106062_G/A | 45        | 4         | SETD2 | stop_gained |

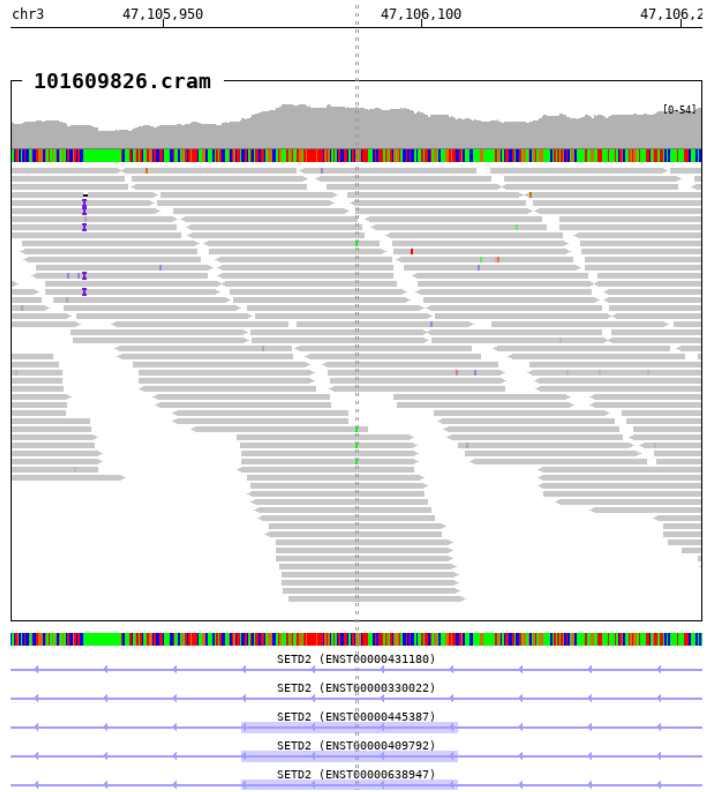

29.3. chr3\_47120981\_G/A

| SampleID | Variants (GRCh38) | Ref_depth | Alt_depth | Gene  | Consequence |
|----------|-------------------|-----------|-----------|-------|-------------|
| 67470    | chr3_47120981_G/A | 51        | 4         | SETD2 | stop_gained |

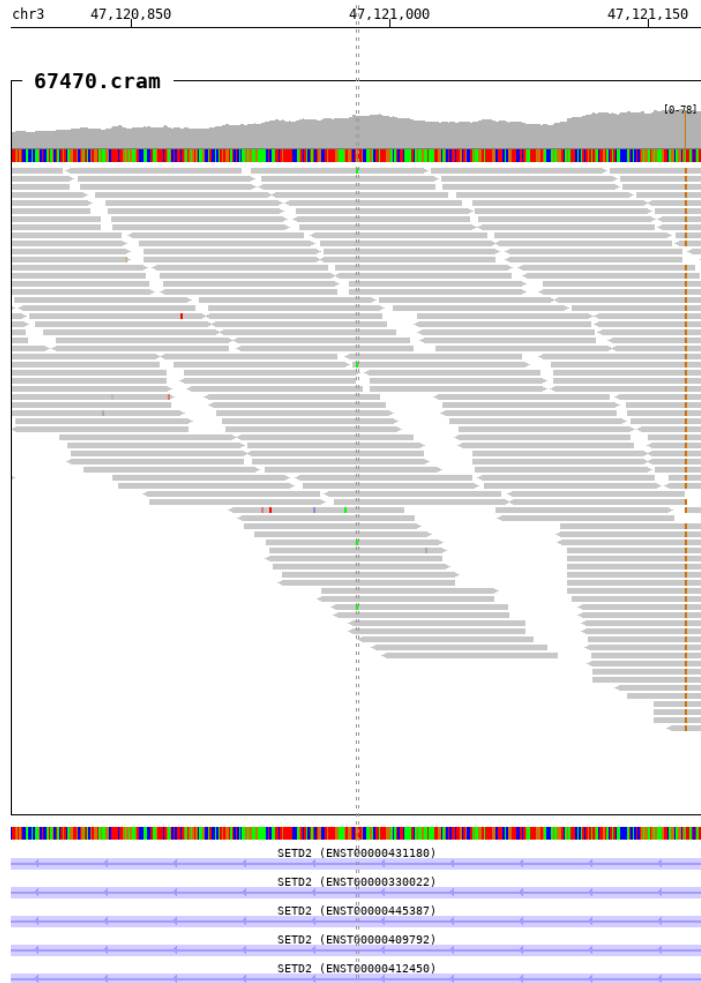

29.4. chr3\_47121143\_C/-

| SampleID | Variants (GRCh38) | Ref_depth | Alt_depth | Gene  | Consequence        |
|----------|-------------------|-----------|-----------|-------|--------------------|
| 64366    | chr3_47121143_C/- | 33        | 5         | SETD2 | frameshift_variant |

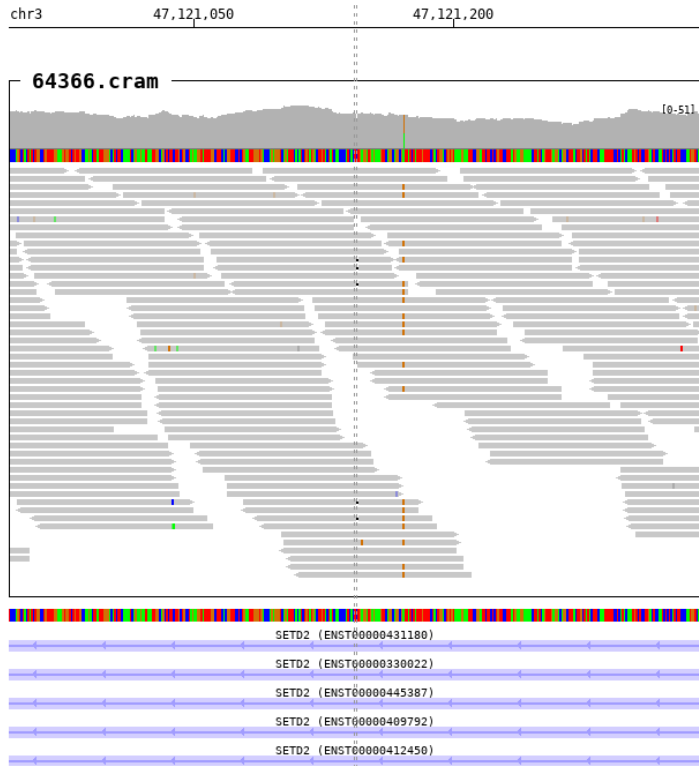

30. SF1

30.1. chr11\_64765837\_GTGGGGGAGCTGGA/-

| SampleID  | Variants (GRCh38)               | Ref_depth | Alt_depth | Gene | Consequence        |
|-----------|---------------------------------|-----------|-----------|------|--------------------|
| 101606749 | chr11_64765837_GTGGGGGAGCTGGA/- | 24        | 2         | SF1  | frameshift_variant |

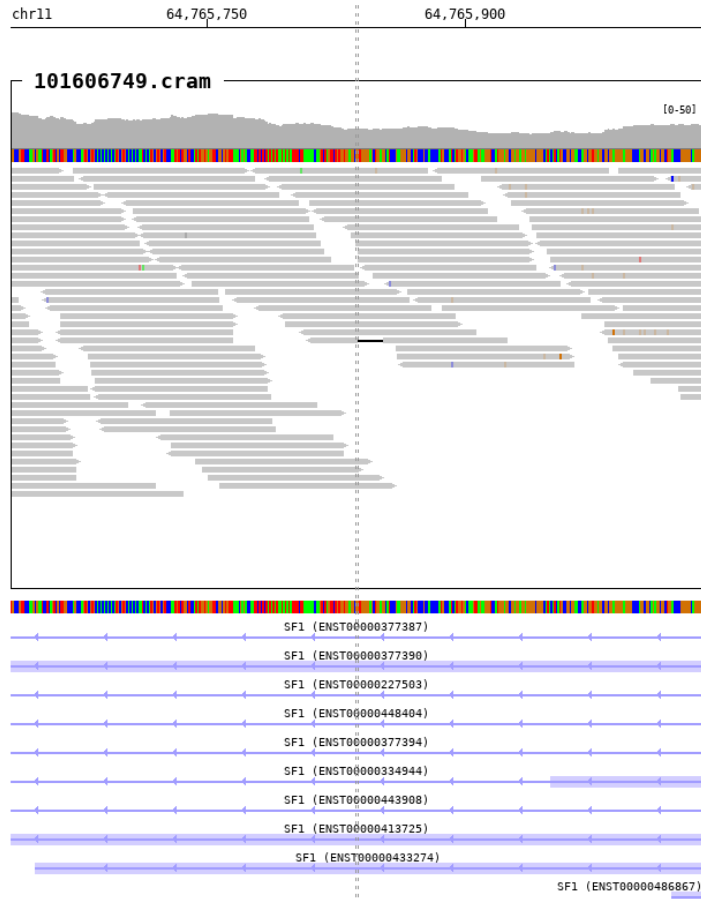

30.2. chr11\_64765922\_AGGCGGAGGAGGA/-

| SampleID  | Variants (GRCh38)                  | Ref_depth | Alt_depth | Gene | Consequence        |
|-----------|------------------------------------|-----------|-----------|------|--------------------|
| 112302993 | chr11_64765922_AGGCGGAGGAGGA<br>/- | 24        | 2         | SF1  | frameshift_variant |

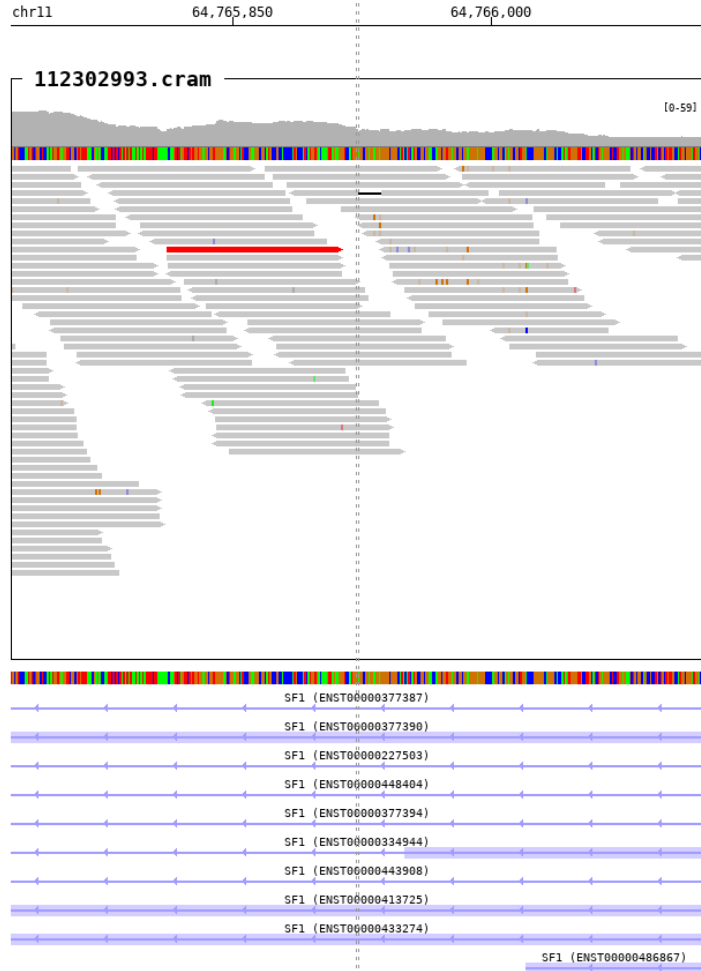

30.3. chr11\_64765929\_GGAGGAGGGGGCG/-

| SampleID  | Variants (GRCh38)                  | Ref_depth | Alt_depth | Gene | Consequence        |
|-----------|------------------------------------|-----------|-----------|------|--------------------|
| 112301153 | chr11_64765929_GGAGGAGGGGGC<br>G/- | 27        | 2         | SF1  | frameshift_variant |

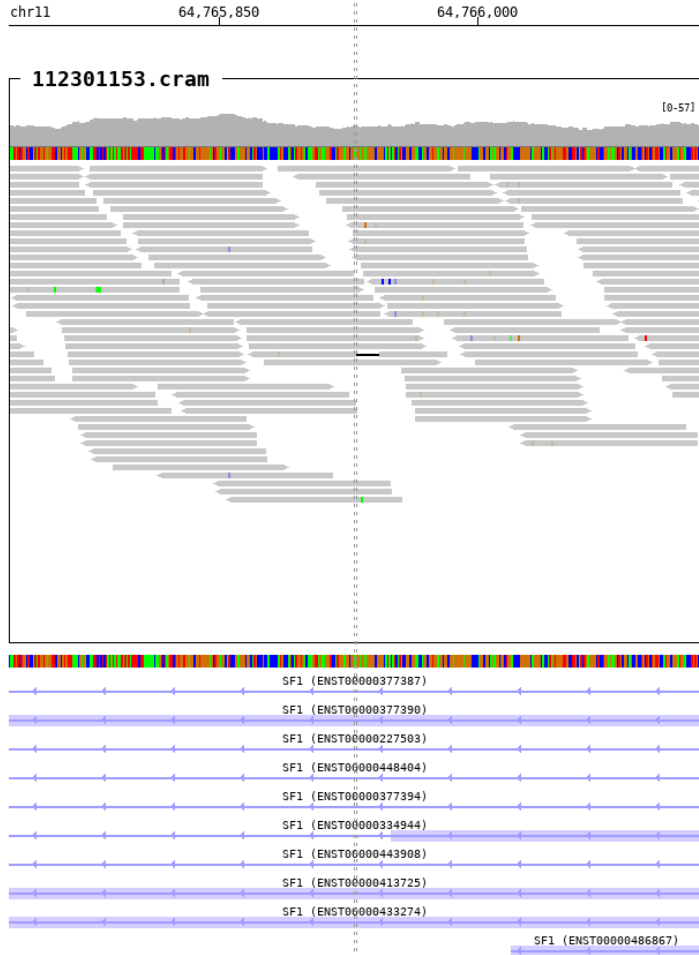

31. SF3A1

31.1. chr22\_30334590\_TGTCTACTTCTTCCTCCCG/-

| SampleID  | Variants (GRCh38)                    | Ref_depth | Alt_depth | Gene  | Consequence |
|-----------|--------------------------------------|-----------|-----------|-------|-------------|
| 100605873 | chr22_30334590_TGTCTACTTCTTCCTCCCG/- | 15        | 2         | SF3A1 | stop_lost   |

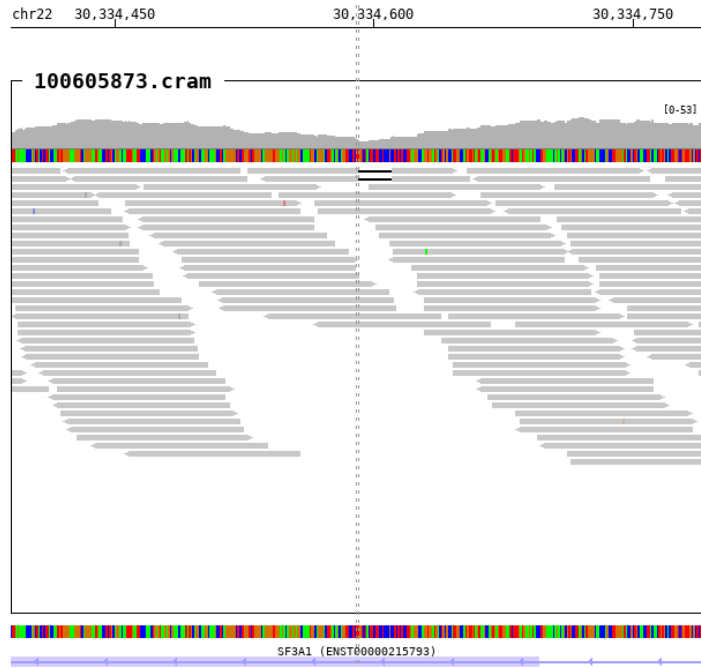

### 32. SF3B1

#### 32.1. chr2\_197402110\_T/C

| SampleID   | Variants (GRCh38)  | Ref_depth | Alt_depth | Gene  | Consequence      |
|------------|--------------------|-----------|-----------|-------|------------------|
| 10511667   | chr2_197402110_T/C | 35        | 5         | SF3B1 | missense_variant |
| 10511991   | chr2_197402110_T/C | 36        | 4         | SF3B1 | missense_variant |
| 11090857   | chr2_197402110_T/C | 43        | 4         | SF3B1 | missense_variant |
| 2103113234 | chr2_197402110_T/C | 41        | 6         | SF3B1 | missense_variant |

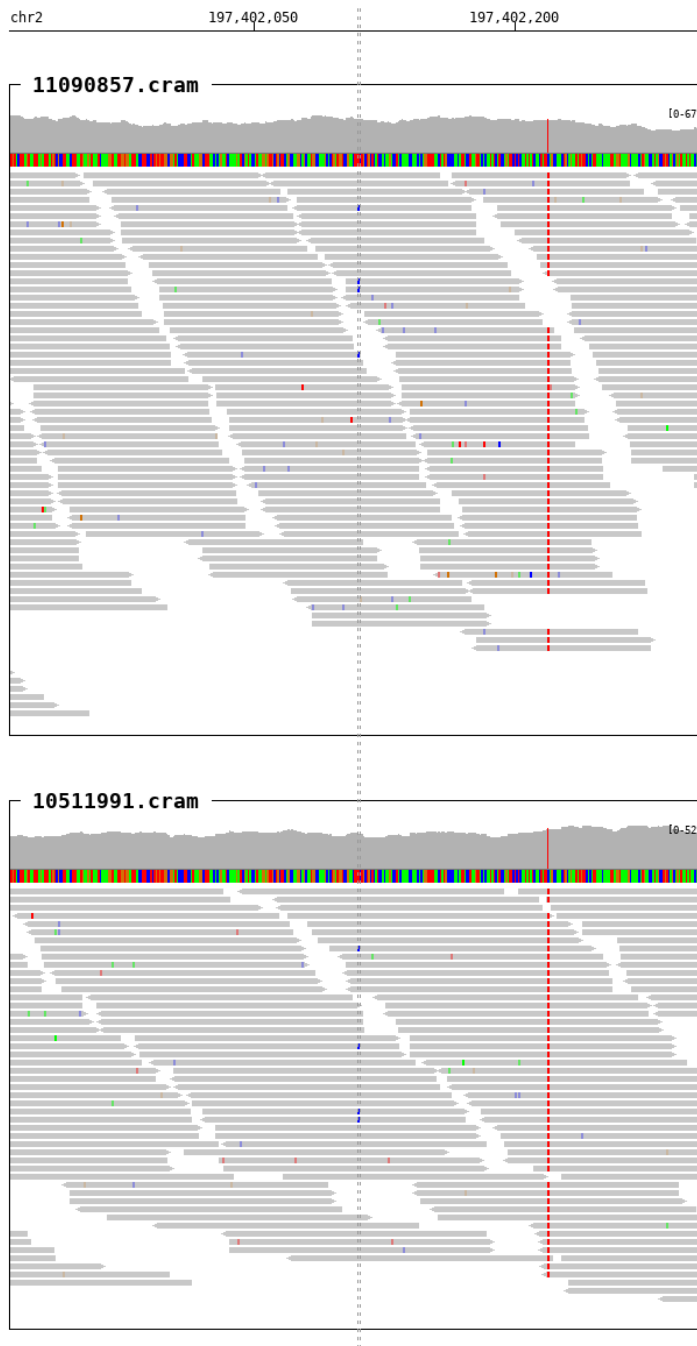

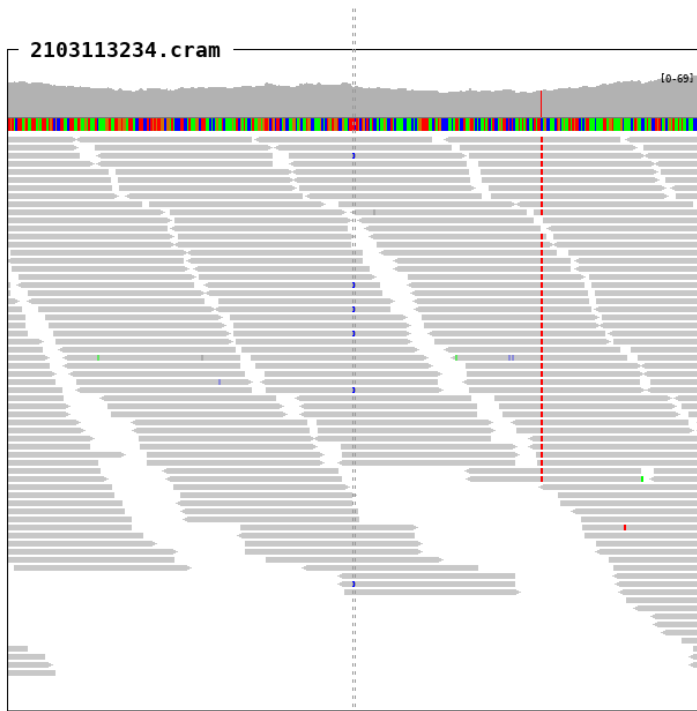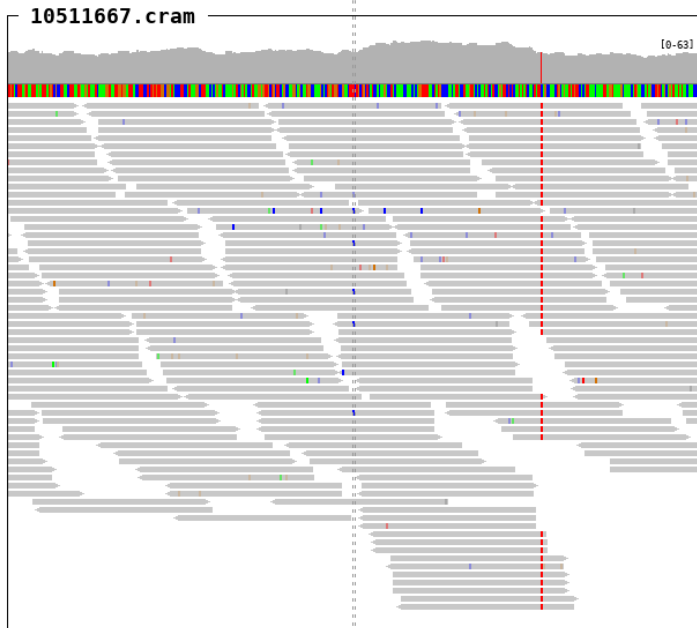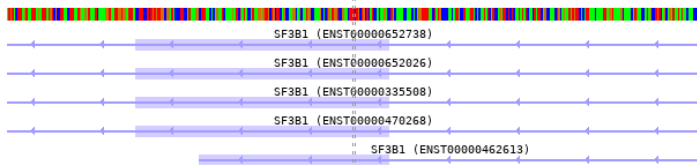

32.2. chr2\_197402635\_C/G

| SampleID | Variants (GRCh38)  | Ref_depth | Alt_depth | Gene  | Consequence      |
|----------|--------------------|-----------|-----------|-------|------------------|
| 11091080 | chr2_197402635_C/G | 34        | 6         | SF3B1 | missense_variant |

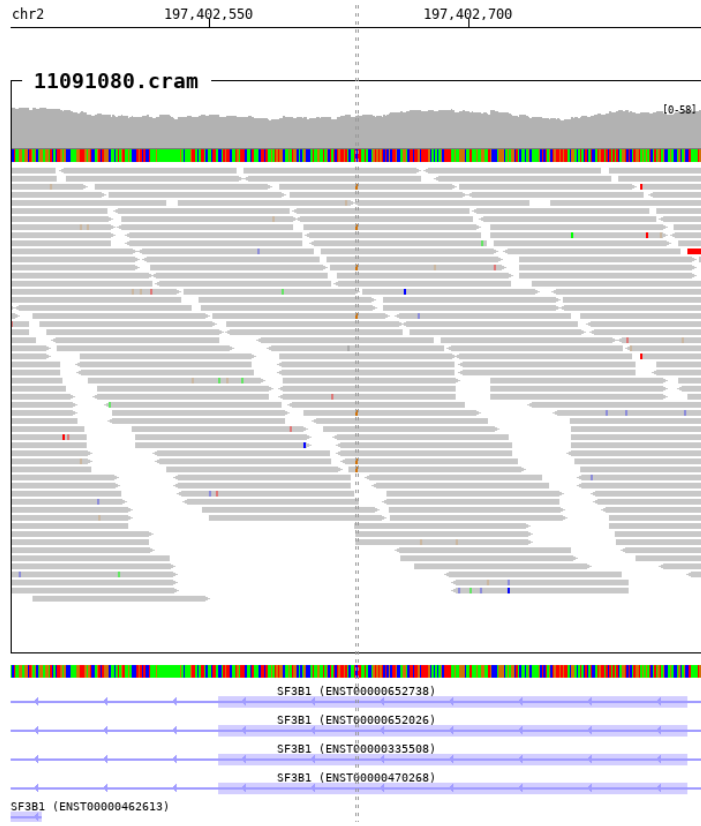

### 33. STAG2

#### 33.1. chrX\_124063866\_C/T

| SampleID | Variants (GRCh38)  | Ref_depth | Alt_depth | Gene  | Consequence |
|----------|--------------------|-----------|-----------|-------|-------------|
| 70279    | chrX_124063866_C/T | 33        | 3         | STAG2 | stop_gained |

chrX 124,063,750 124,063,900 124,064,0

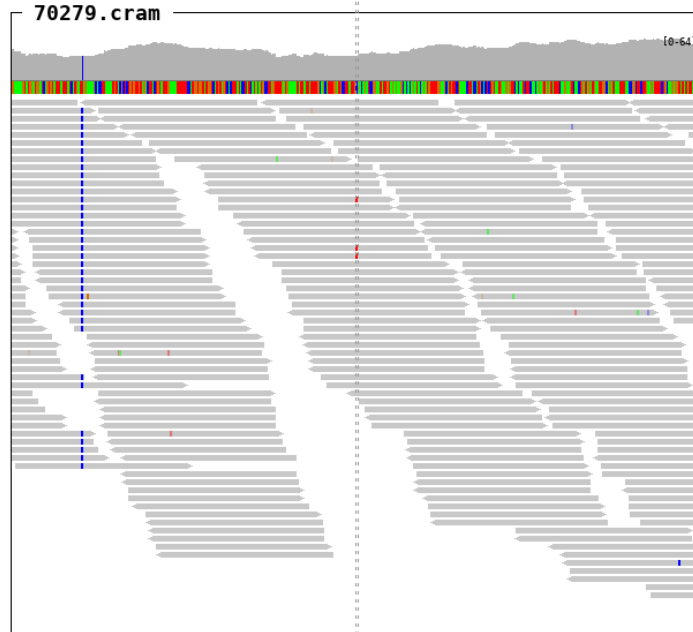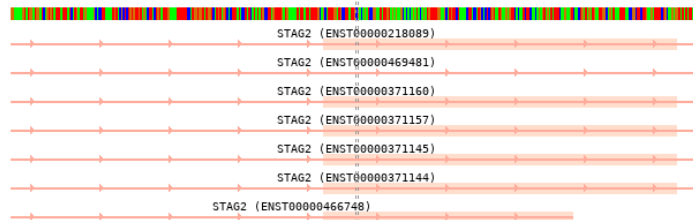

### 34. TET2

#### 34.1. chr4\_105233896\_G/A

| SampleID   | Variants (GRCh38)  | Ref_depth | Alt_depth | Gene | Consequence             |
|------------|--------------------|-----------|-----------|------|-------------------------|
| 4202023129 | chr4_105233896_G/A | 32        | 6         | TET2 | splice_acceptor_variant |

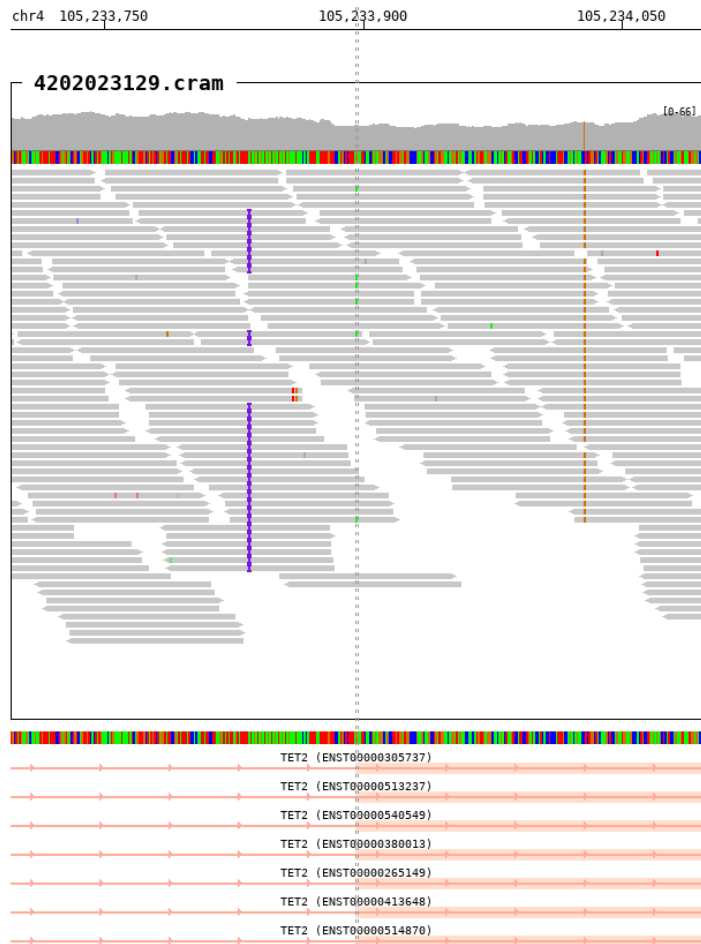

34.2. chr4\_105234173\_TT/-

| SampleID | Variants (GRCh38)   | Ref_depth | Alt_depth | Gene | Consequence        |
|----------|---------------------|-----------|-----------|------|--------------------|
| 65210    | chr4_105234173_TT/- | 20        | 3         | TET2 | frameshift_variant |

chr4 105,234,050 105,234,200 105,234,350

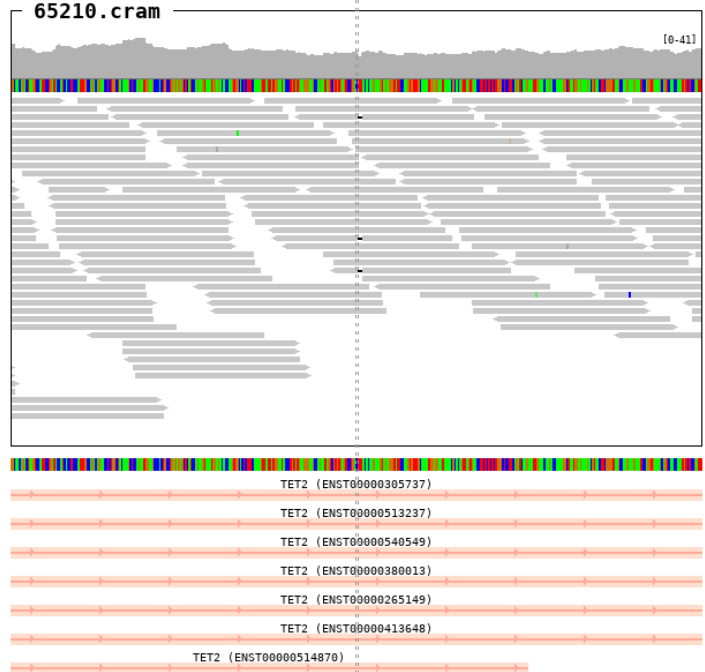

34.3. chr4\_105234229\_C/-

| SampleID  | Variants (GRCh38)  | Ref_depth | Alt_depth | Gene | Consequence        |
|-----------|--------------------|-----------|-----------|------|--------------------|
| 101105878 | chr4_105234229_C/- | 39        | 4         | TET2 | frameshift_variant |

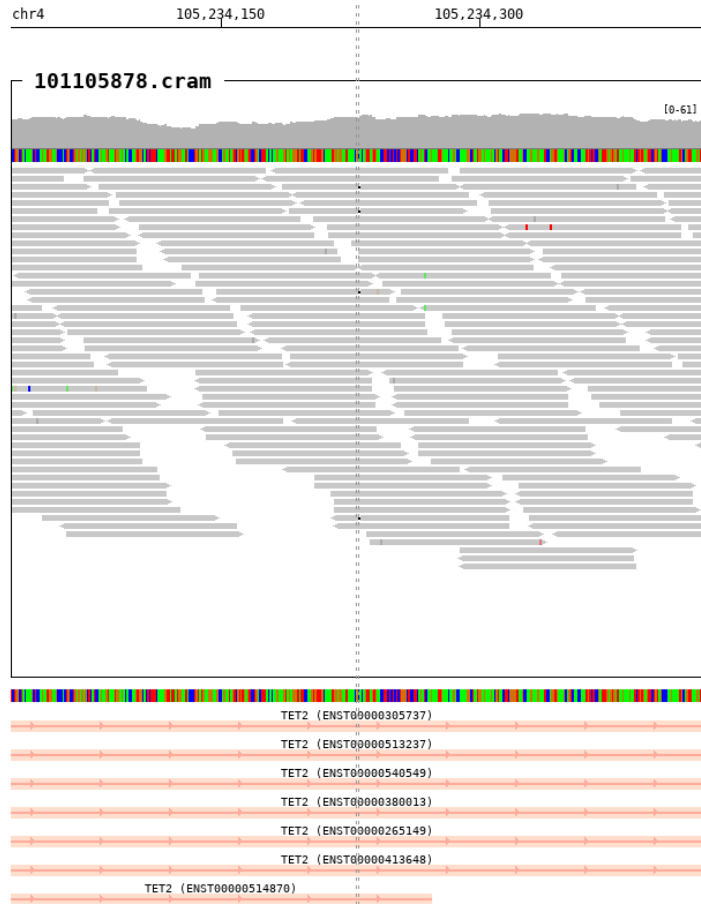

34.4. chr4\_105234423\_-/A

| SampleID | Variants (GRCh38)  | Ref_depth | Alt_depth | Gene | Consequence        |
|----------|--------------------|-----------|-----------|------|--------------------|
| 60063    | chr4_105234423_-/A | 35        | 7         | TET2 | frameshift_variant |

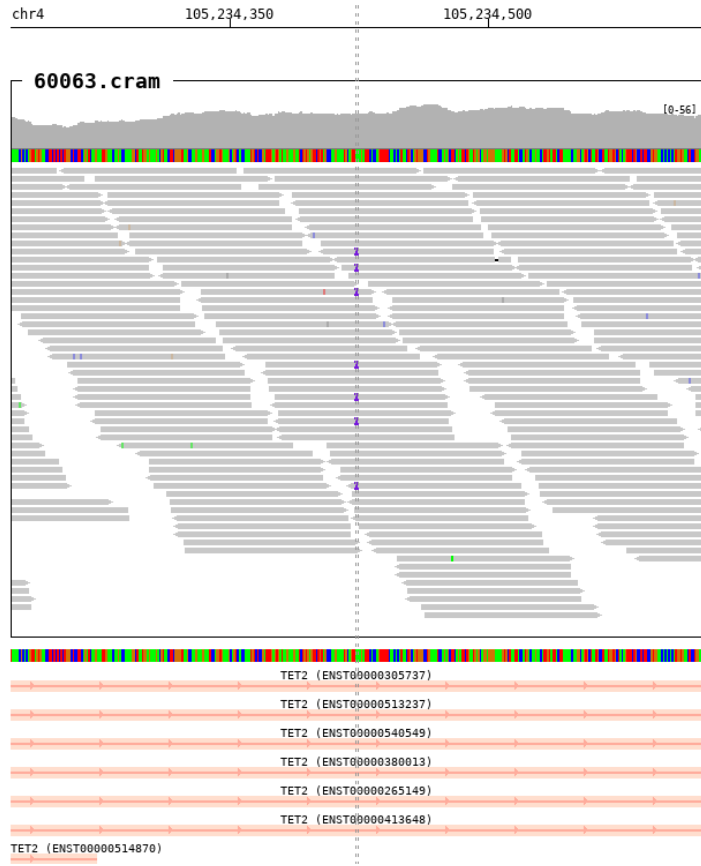

34.5. chr4\_105234711\_C/-

| SampleID | Variants (GRCh38)  | Ref_depth | Alt_depth | Gene | Consequence        |
|----------|--------------------|-----------|-----------|------|--------------------|
| 10312639 | chr4_105234711_C/- | 29        | 8         | TET2 | frameshift_variant |

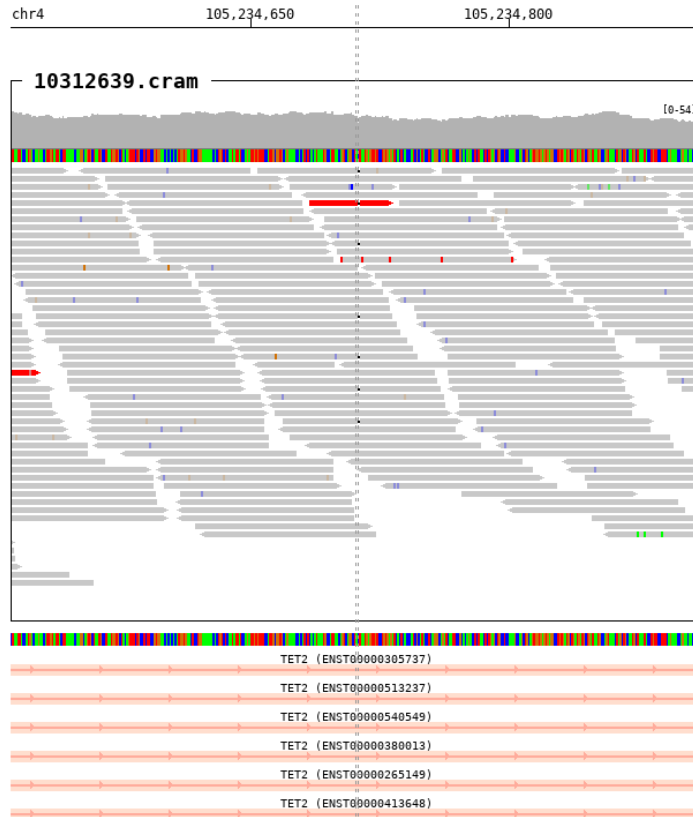

34.6. chr4\_105234728\_T/A

| SampleID  | Variants (GRCh38)  | Ref_depth | Alt_depth | Gene | Consequence |
|-----------|--------------------|-----------|-----------|------|-------------|
| 101104030 | chr4_105234728_T/A | 29        | 6         | TET2 | stop_gained |

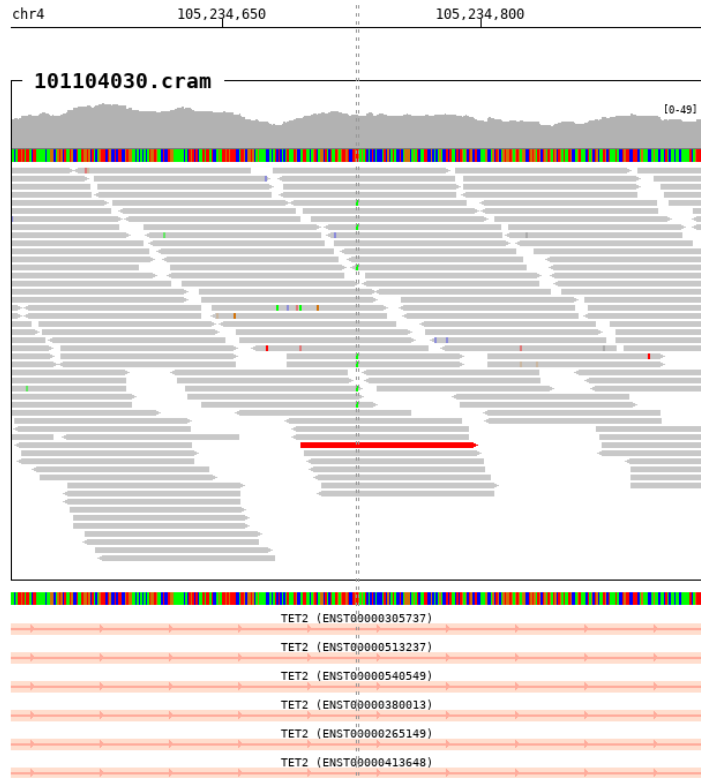

34.7. chr4\_105234771\_CACAGACCTCTAA/-

| SampleID | Variants (GRCh38)              | Ref_depth | Alt_depth | Gene | Consequence        |
|----------|--------------------------------|-----------|-----------|------|--------------------|
| 10642021 | chr4_105234771_CACAGACCTCTAA/- | 25        | 7         | TET2 | frameshift_variant |

chr4 105,234,650 105,234,800 105,234,95

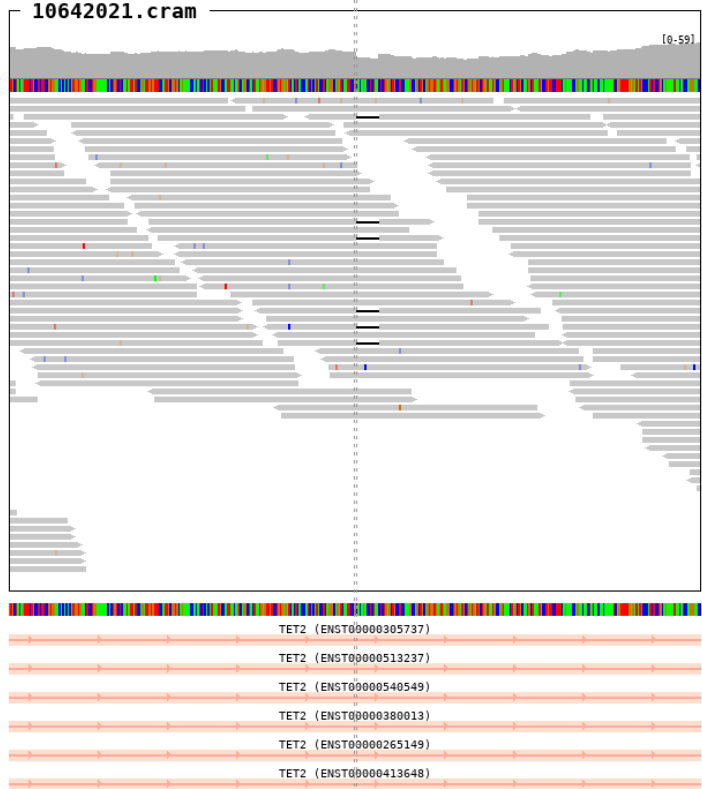

34.8. chr4\_105234877\_T/-

| SampleID  | Variants (GRCh38)  | Ref_depth | Alt_depth | Gene | Consequence        |
|-----------|--------------------|-----------|-----------|------|--------------------|
| 101609181 | chr4_105234877_T/- | 28        | 3         | TET2 | frameshift_variant |

chr4 105,234,750 105,234,900 105,235,050

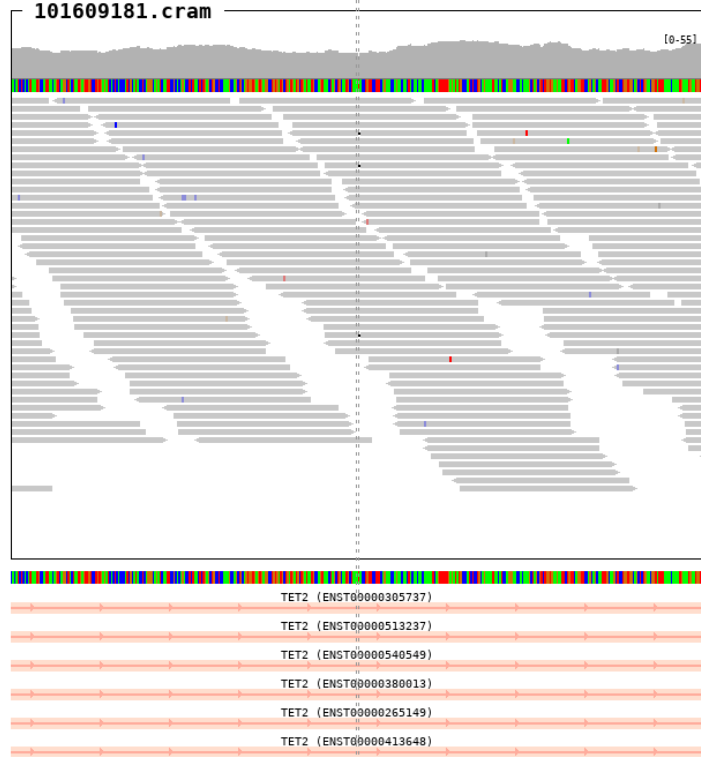

34.9. chr4\_105234902\_C/-

| SampleID   | Variants (GRCh38)  | Ref_depth | Alt_depth | Gene | Consequence        |
|------------|--------------------|-----------|-----------|------|--------------------|
| 4331231202 | chr4_105234902_C/- | 40        | 6         | TET2 | frameshift_variant |

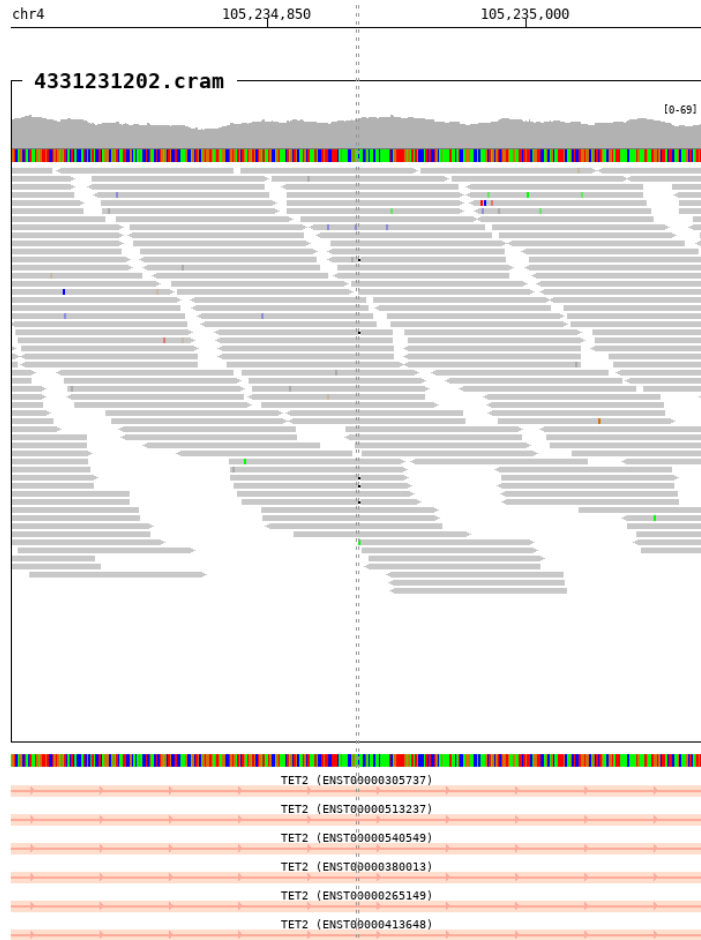

34.10. chr4\_105235003\_C/G

| SampleID | Variants (GRCh38)  | Ref_depth | Alt_depth | Gene | Consequence |
|----------|--------------------|-----------|-----------|------|-------------|
| 10310756 | chr4_105235003_C/G | 33        | 7         | TET2 | stop_gained |

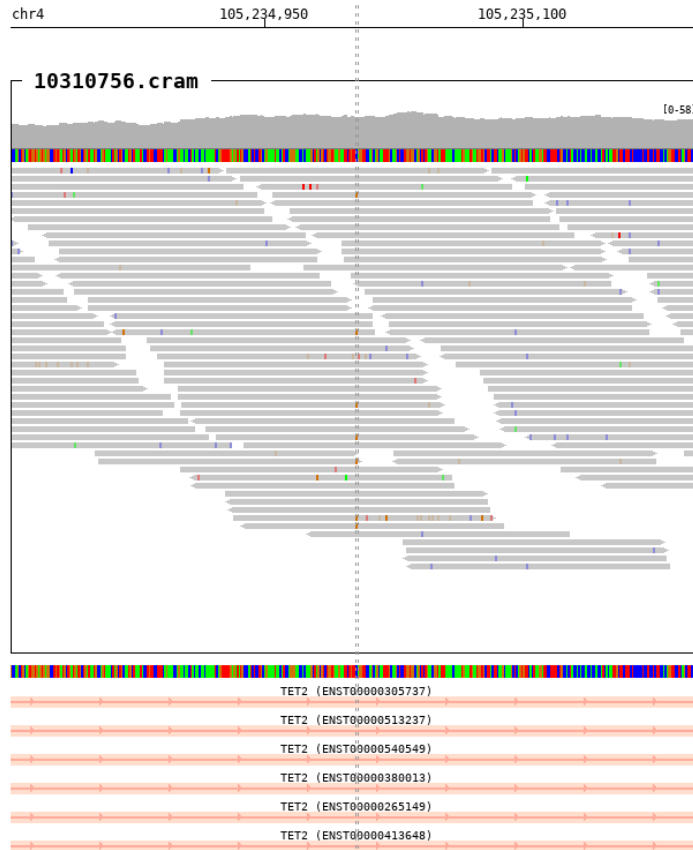

34.11. chr4\_105235059\_C/T

| SampleID | Variants (GRCh38)  | Ref_depth | Alt_depth | Gene | Consequence |
|----------|--------------------|-----------|-----------|------|-------------|
| 10013658 | chr4_105235059_C/T | 26        | 4         | TET2 | stop_gained |

chr4 105,234,950 105,235,100 105,235,

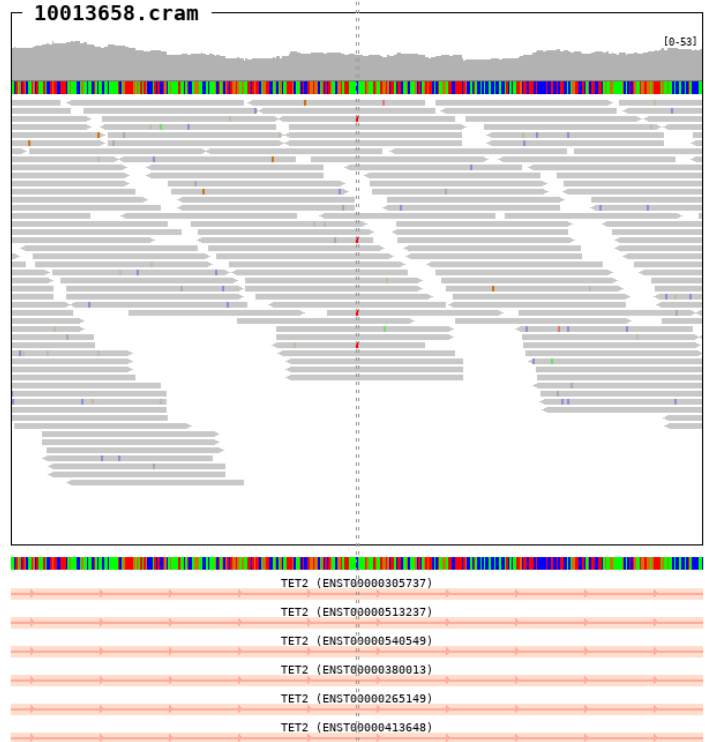

34.12. chr4\_105235352\_A/-

| SampleID  | Variants (GRCh38)  | Ref_depth | Alt_depth | Gene | Consequence        |
|-----------|--------------------|-----------|-----------|------|--------------------|
| 112404349 | chr4_105235352_A/- | 36        | 3         | TET2 | frameshift_variant |

chr4 105,235,250 105,235,400 105,23

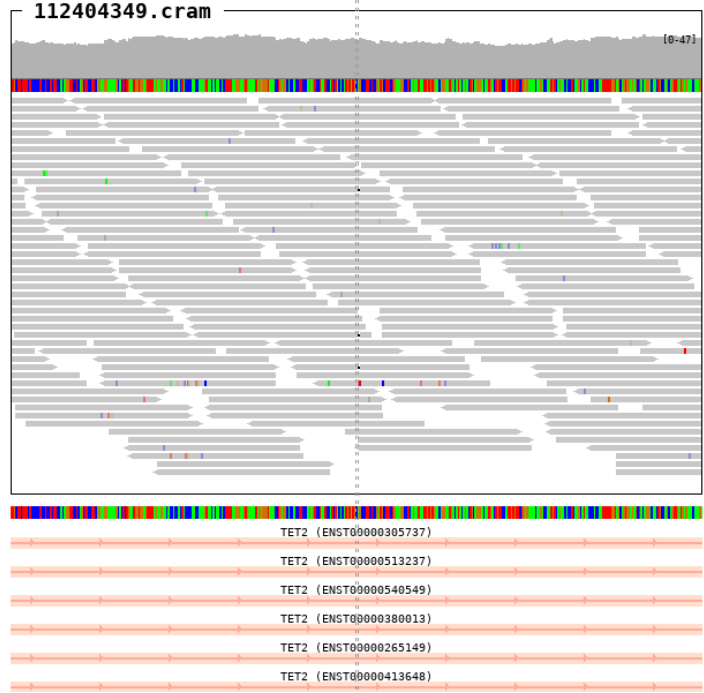

34.13. chr4\_105235382\_CAGAATAATTGTGTGAACAGGAATGACATACA/-

| SampleID | Variants (GRCh38)                                     | Ref_depth | Alt_depth | Gene | Consequence        |
|----------|-------------------------------------------------------|-----------|-----------|------|--------------------|
| 11311172 | chr4_105235382_CAGAATAATTG<br>TGTGAACAGGAATGACATACA/- | 48        | 3         | TET2 | frameshift_variant |

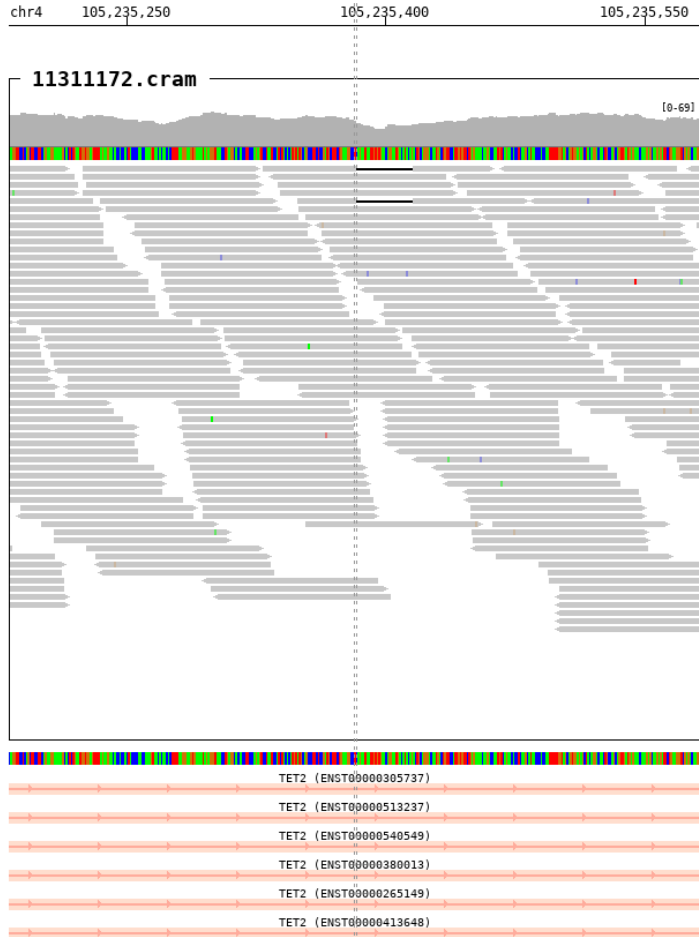

34.14. chr4\_105235572\_C/T

| SampleID   | Variants (GRCh38)  | Ref_depth | Alt_depth | Gene | Consequence |
|------------|--------------------|-----------|-----------|------|-------------|
| 5134342326 | chr4_105235572_C/T | 35        | 3         | TET2 | stop_gained |

chr4 105,235,450 105,235,600 105,235,750

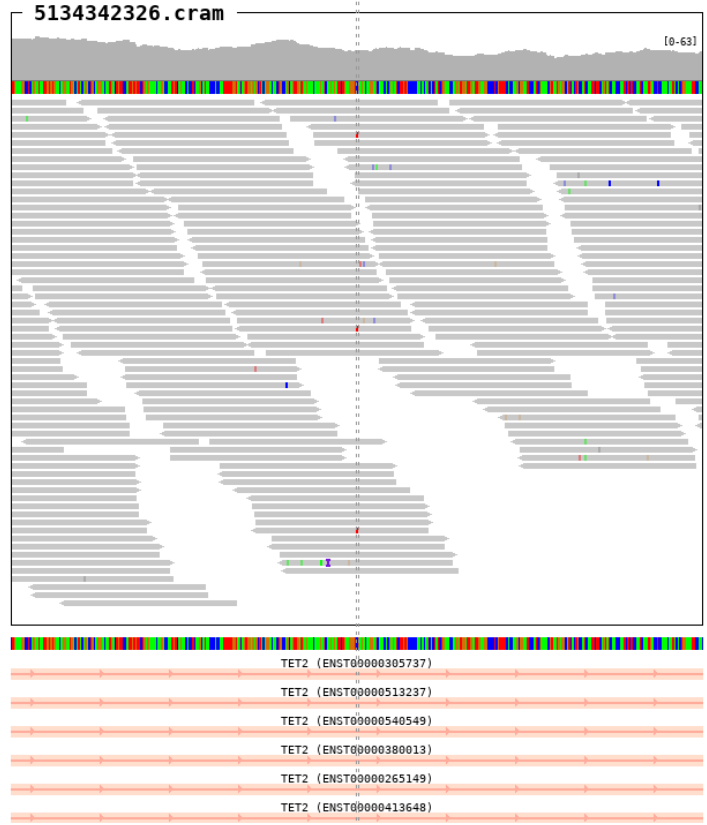

34.15. chr4\_105235662\_C/T

| SampleID  | Variants (GRCh38)  | Ref_depth | Alt_depth | Gene | Consequence |
|-----------|--------------------|-----------|-----------|------|-------------|
| 100600885 | chr4_105235662_C/T | 43        | 3         | TET2 | stop_gained |

chr4 105,235,550 105,235,700 105,235,850

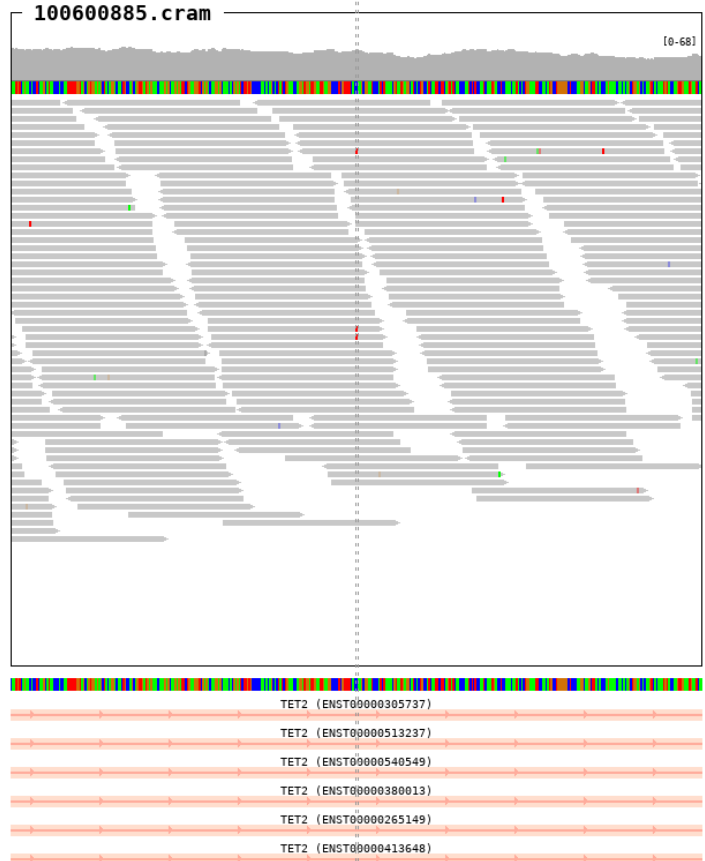

34.16. chr4\_105235718\_CAACC/-

| SampleID | Variants (GRCh38)      | Ref_depth | Alt_depth | Gene | Consequence        |
|----------|------------------------|-----------|-----------|------|--------------------|
| 10512027 | chr4_105235718_CAACC/- | 37        | 5         | TET2 | frameshift_variant |

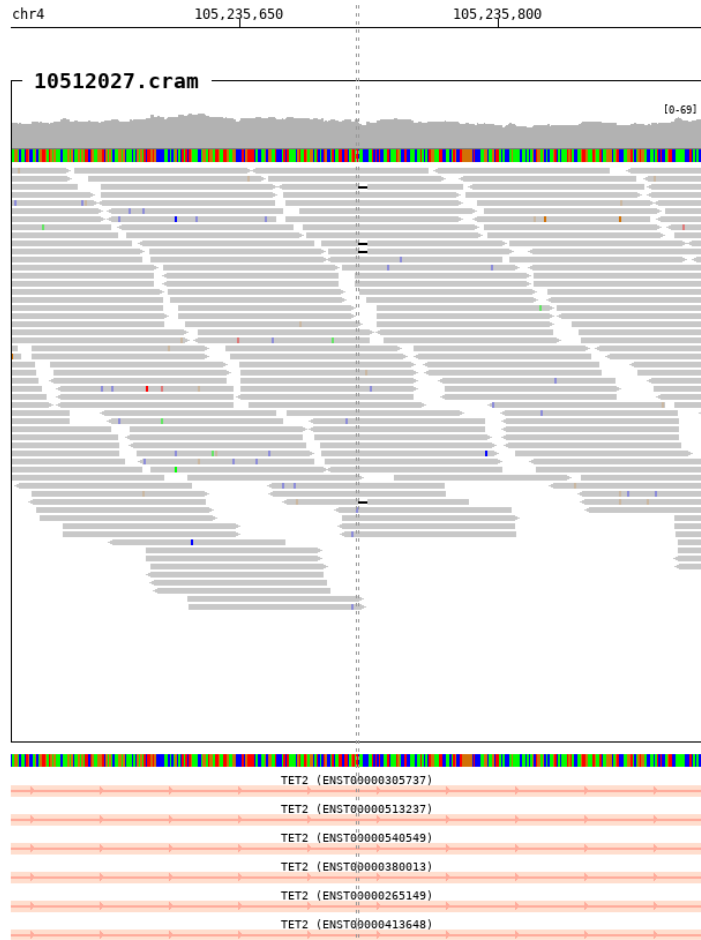

34.17. chr4\_105235751\_-/C

| SampleID  | Variants (GRCh38)  | Ref_depth | Alt_depth | Gene | Consequence        |
|-----------|--------------------|-----------|-----------|------|--------------------|
| 112302420 | chr4_105235751_-/C | 46        | 4         | TET2 | frameshift_variant |

chr4 105,235,650 105,235,800 105,23

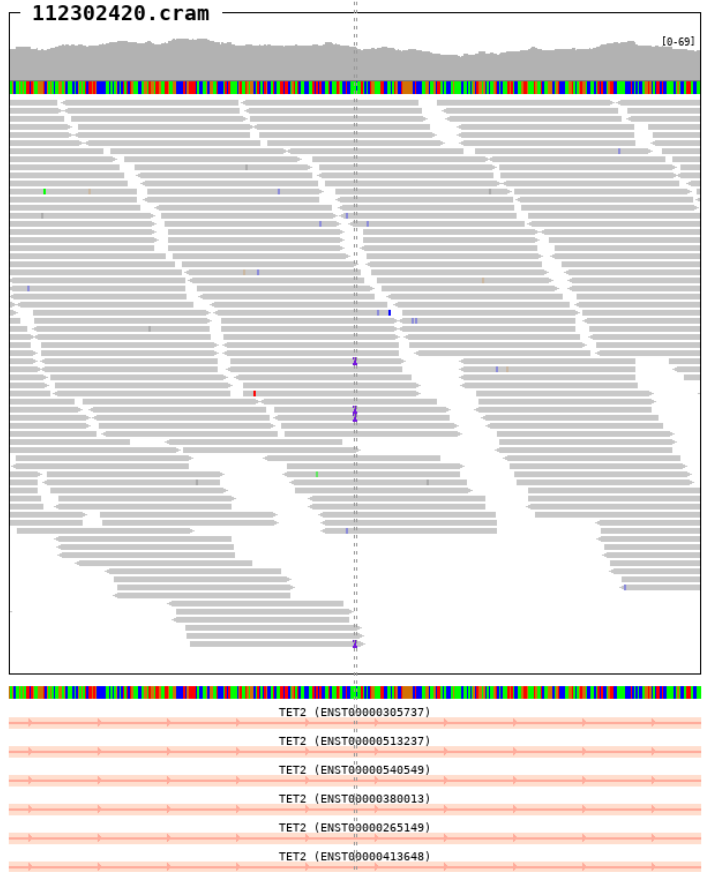

34.18. chr4\_105235912\_C/G

| SampleID | Variants (GRCh38)  | Ref_depth | Alt_depth | Gene | Consequence |
|----------|--------------------|-----------|-----------|------|-------------|
| 11540211 | chr4_105235912_C/G | 26        | 5         | TET2 | stop_gained |

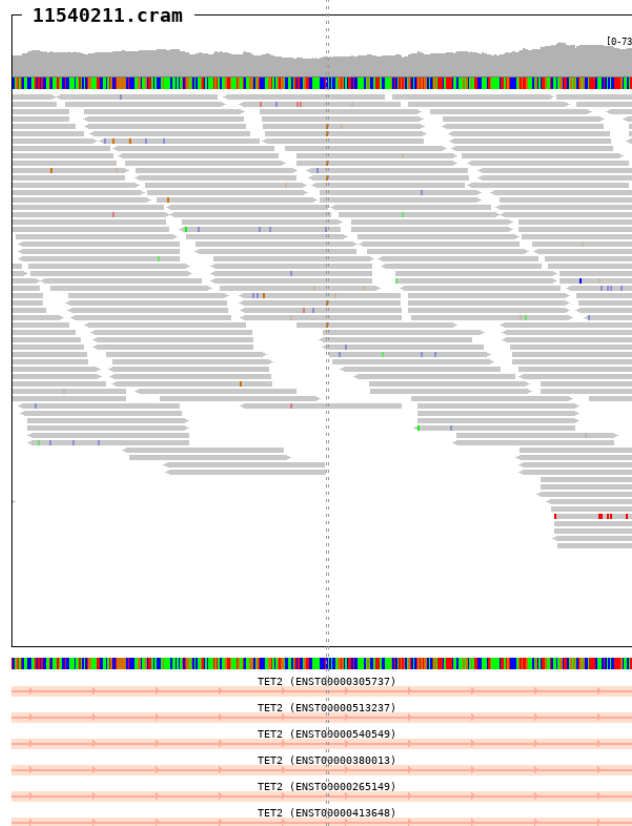

34.19. chr4\_105235912\_C/A

| SampleID | Variants (GRCh38)  | Ref_depth | Alt_depth | Gene | Consequence |
|----------|--------------------|-----------|-----------|------|-------------|
| 12320090 | chr4_105235912_C/A | 31        | 3         | TET2 | stop_gained |

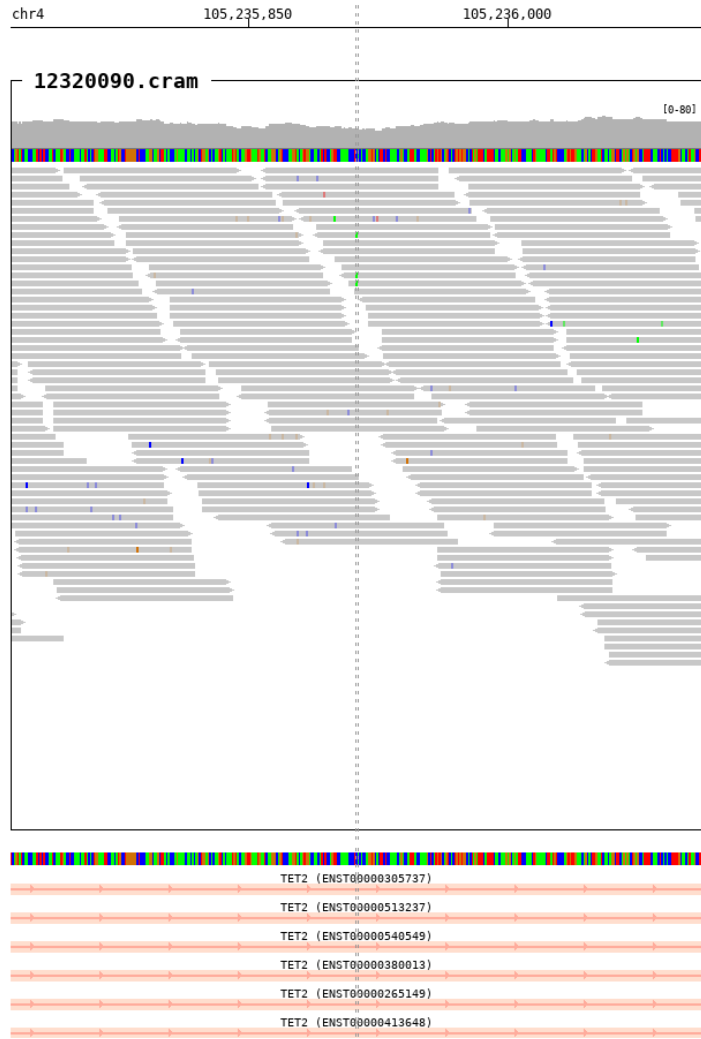

34.20. chr4\_105236043\_C/T

| SampleID  | Variants (GRCh38)  | Ref_depth | Alt_depth | Gene | Consequence |
|-----------|--------------------|-----------|-----------|------|-------------|
| 100601561 | chr4_105236043_C/T | 37        | 8         | TET2 | stop_gained |

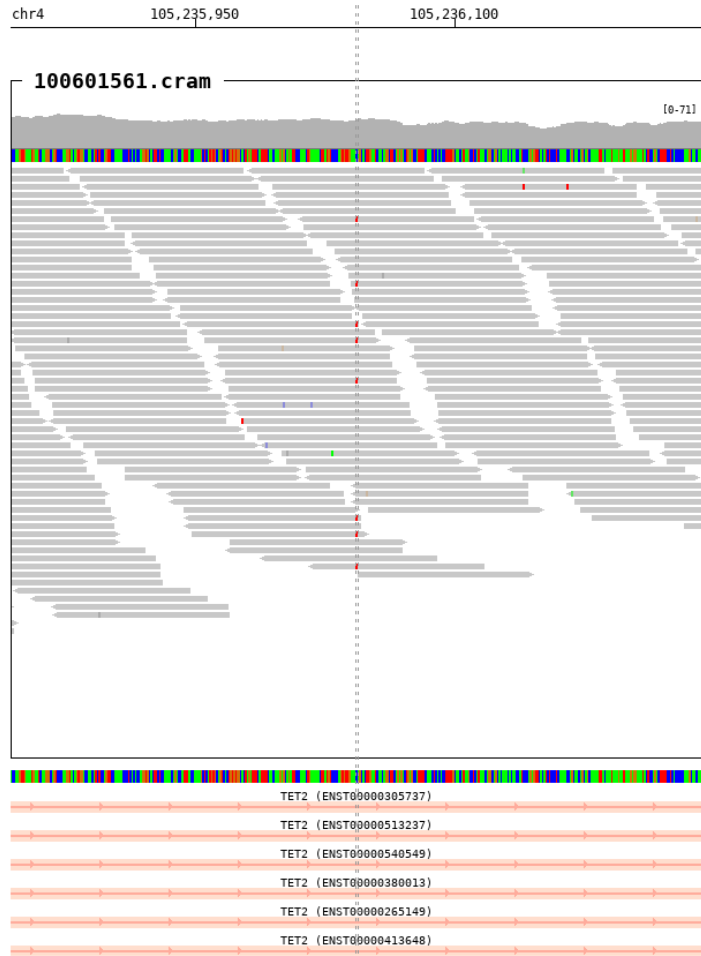

34.21. chr4\_105236075\_C/-

| SampleID   | Variants (GRCh38)  | Ref_depth | Alt_depth | Gene | Consequence        |
|------------|--------------------|-----------|-----------|------|--------------------|
| 1202252304 | chr4_105236075_C/- | 29        | 6         | TET2 | frameshift_variant |

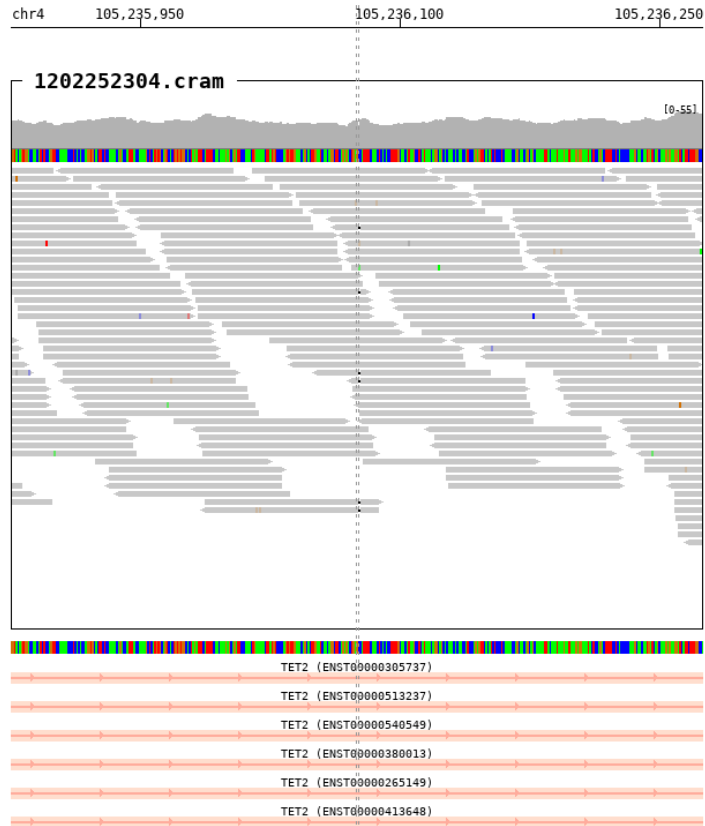

34.22. chr4\_105236105\_TA/AT

| SampleID  | Variants (GRCh38)    | Ref_depth | Alt_depth | Gene | Consequence |
|-----------|----------------------|-----------|-----------|------|-------------|
| 101609181 | chr4_105236105_TA/AT | 44        | 3         | TET2 | stop_gained |

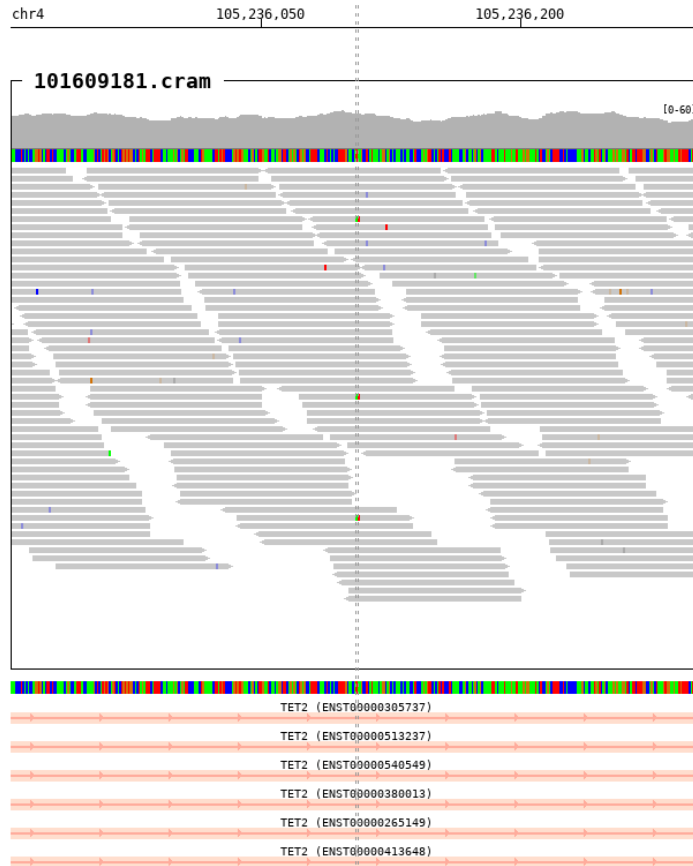

34.23. chr4\_105236218\_TT/-

| SampleID | Variants (GRCh38)   | Ref_depth | Alt_depth | Gene | Consequence        |
|----------|---------------------|-----------|-----------|------|--------------------|
| 61766    | chr4_105236218_TT/- | 40        | 5         | TET2 | frameshift_variant |

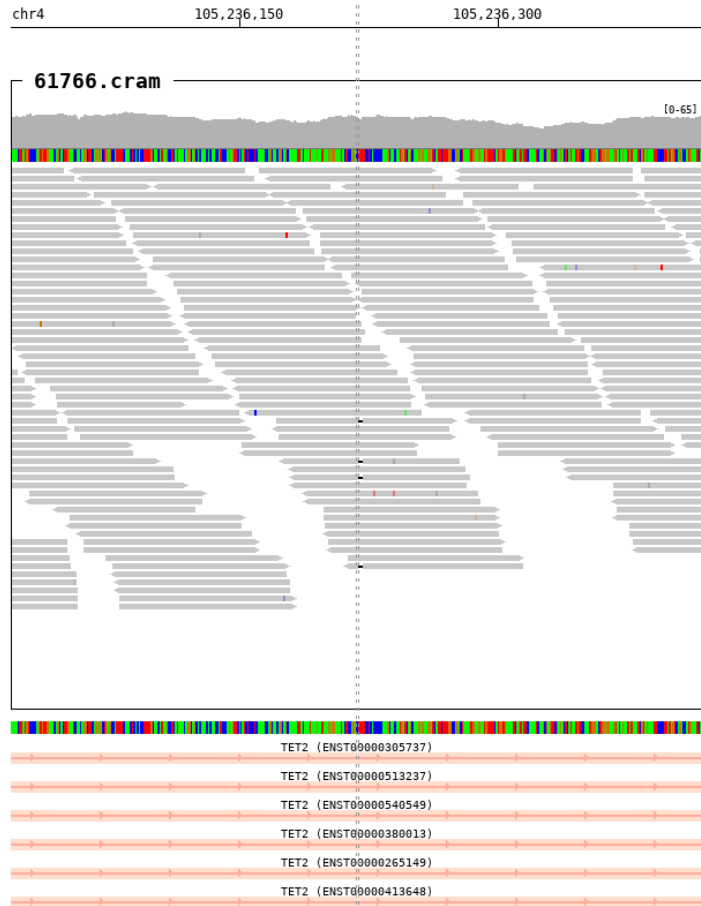

34.24. chr4\_105236323\_A/-

| SampleID  | Variants (GRCh38)  | Ref_depth | Alt_depth | Gene | Consequence        |
|-----------|--------------------|-----------|-----------|------|--------------------|
| 112301254 | chr4_105236323_A/- | 44        | 5         | TET2 | frameshift_variant |

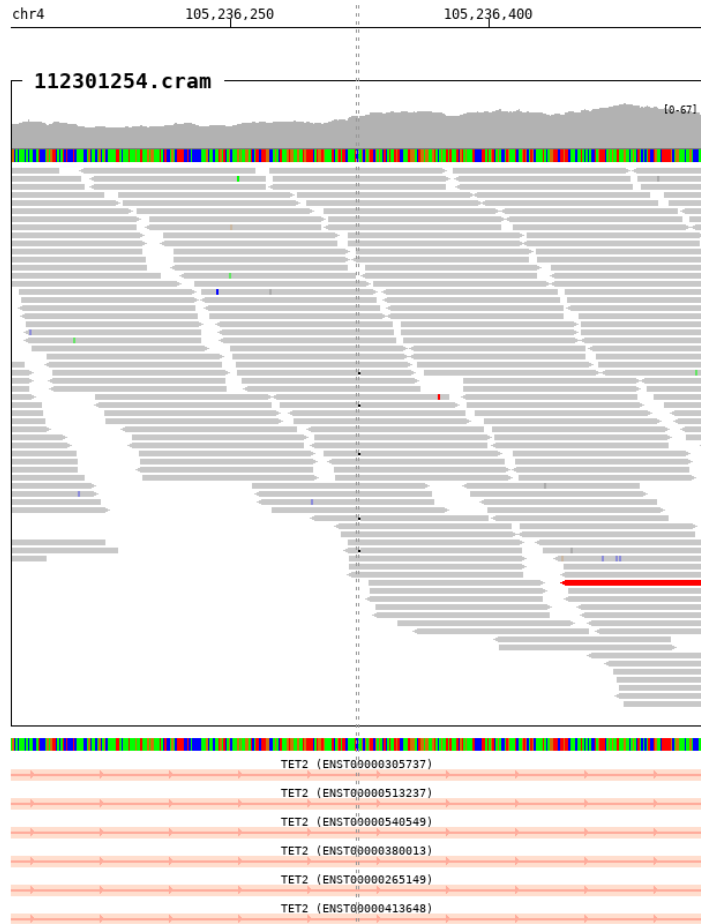

34.25. chr4\_105236334\_G/T

| SampleID | Variants (GRCh38)  | Ref_depth | Alt_depth | Gene | Consequence |
|----------|--------------------|-----------|-----------|------|-------------|
| 10010357 | chr4_105236334_G/T | 39        | 3         | TET2 | stop_gained |

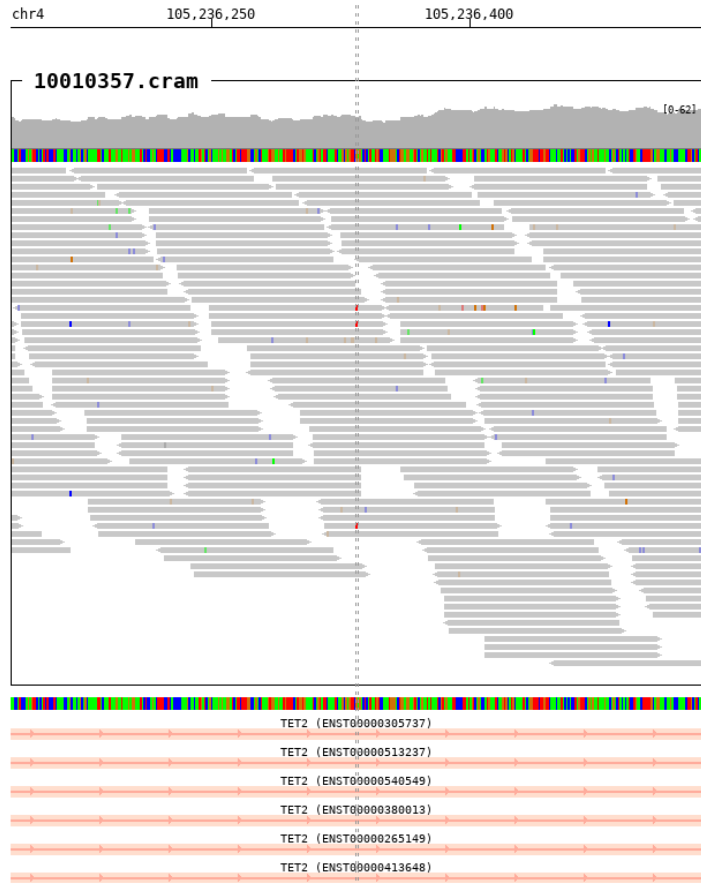

34.26. chr4\_105236358\_-/C

| SampleID  | Variants (GRCh38)  | Ref_depth | Alt_depth | Gene | Consequence        |
|-----------|--------------------|-----------|-----------|------|--------------------|
| 112402522 | chr4_105236358_-/C | 34        | 4         | TET2 | frameshift_variant |

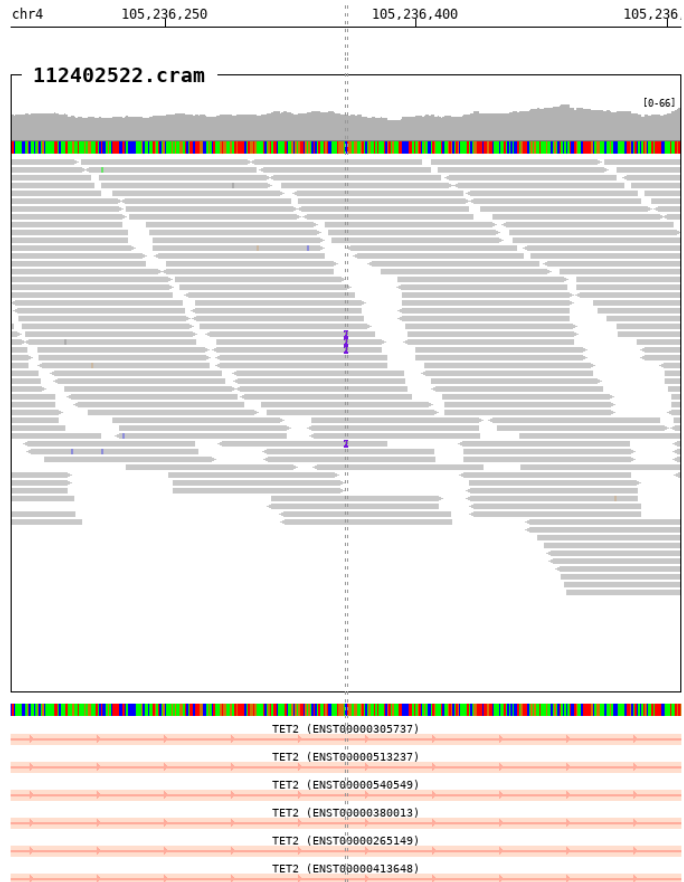

34.27. chr4\_105236358\_T/-

| SampleID | Variants (GRCh38)  | Ref_depth | Alt_depth | Gene | Consequence        |
|----------|--------------------|-----------|-----------|------|--------------------|
| 67375    | chr4_105236358_T/- | 40        | 4         | TET2 | frameshift_variant |

chr4 105,236,250 105,236,400 105,236

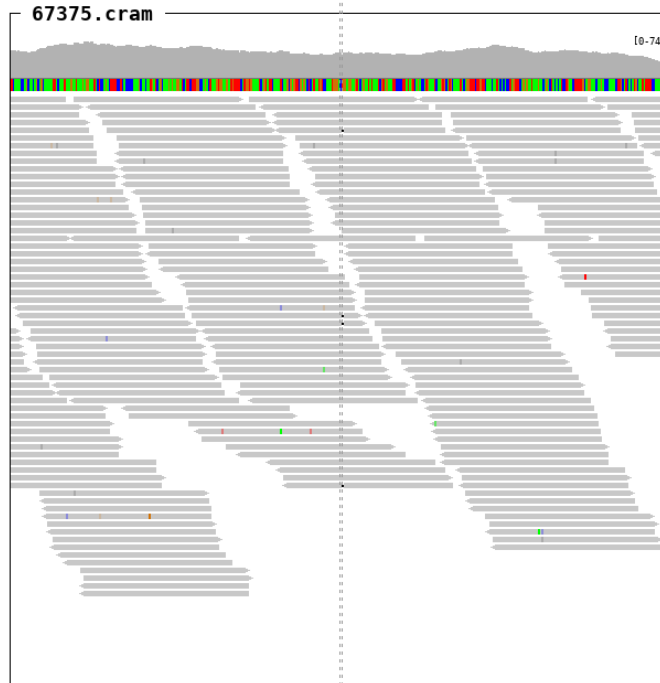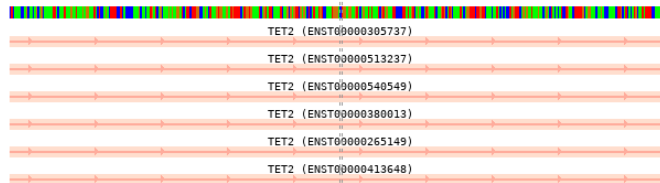

34.28. chr4\_105236416\_C/G

| SampleID  | Variants (GRCh38)  | Ref_depth | Alt_depth | Gene | Consequence |
|-----------|--------------------|-----------|-----------|------|-------------|
| 110101399 | chr4_105236416_C/G | 43        | 10        | TET2 | stop_gained |

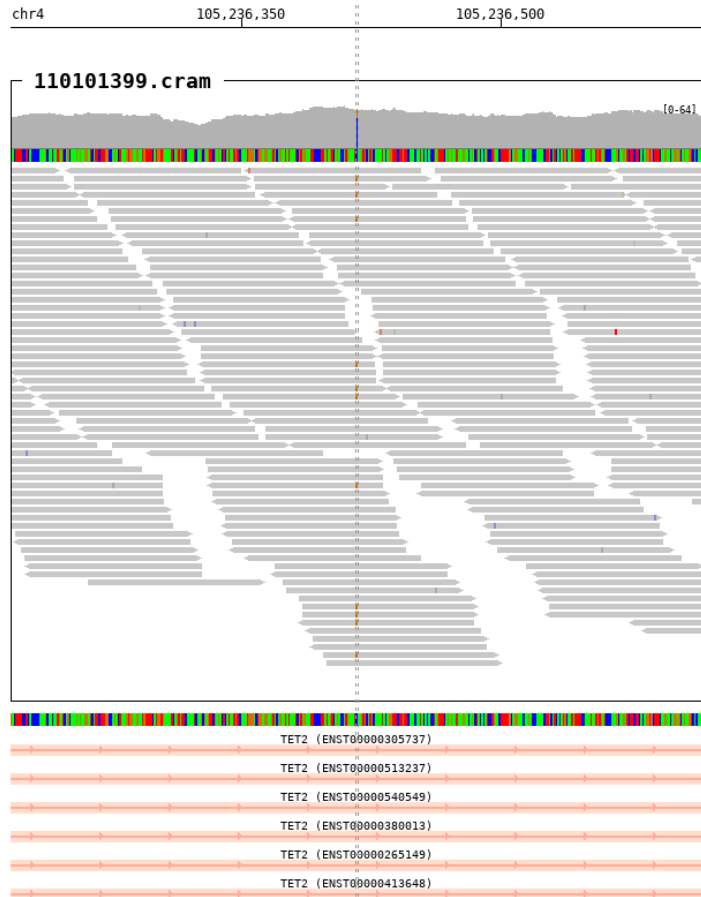

34.29. chr4\_105236431\_-/T

| SampleID  | Variants (GRCh38)  | Ref_depth | Alt_depth | Gene | Consequence        |
|-----------|--------------------|-----------|-----------|------|--------------------|
| 100606835 | chr4_105236431_-/T | 58        | 5         | TET2 | frameshift_variant |

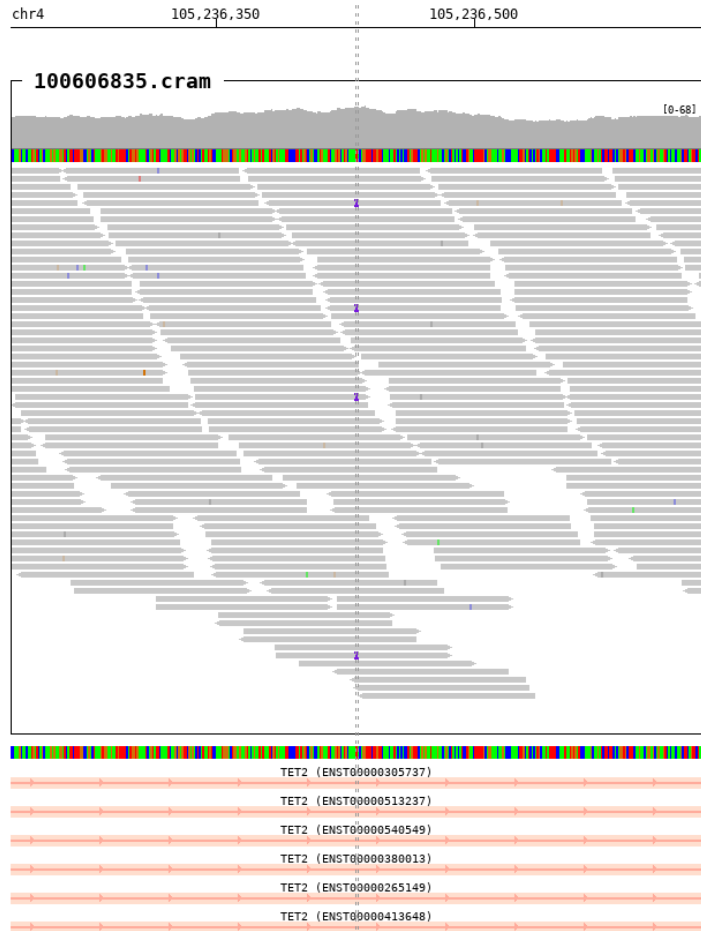

34.30. chr4\_105236527\_G/-

| SampleID  | Variants (GRCh38)  | Ref_depth | Alt_depth | Gene | Consequence        |
|-----------|--------------------|-----------|-----------|------|--------------------|
| 110104381 | chr4_105236527_G/- | 41        | 5         | TET2 | frameshift_variant |

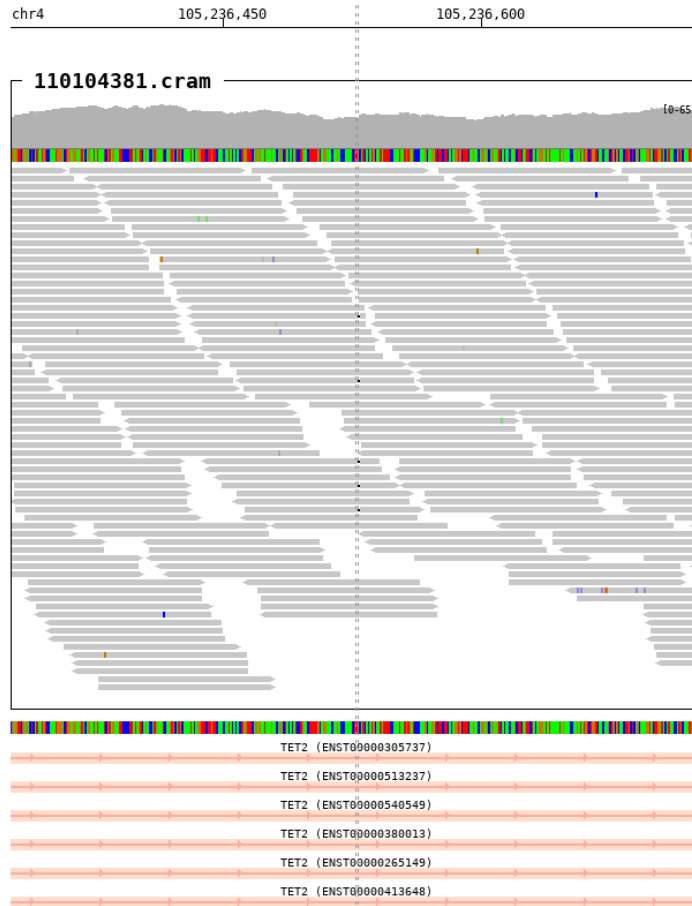

34.31. chr4\_105236564\_AAGCAAGATC/-

| SampleID  | Variants (GRCh38)           | Ref_depth | Alt_depth | Gene | Consequence        |
|-----------|-----------------------------|-----------|-----------|------|--------------------|
| 102102435 | chr4_105236564_AAGCAAGATC/- | 49        | 4         | TET2 | frameshift_variant |

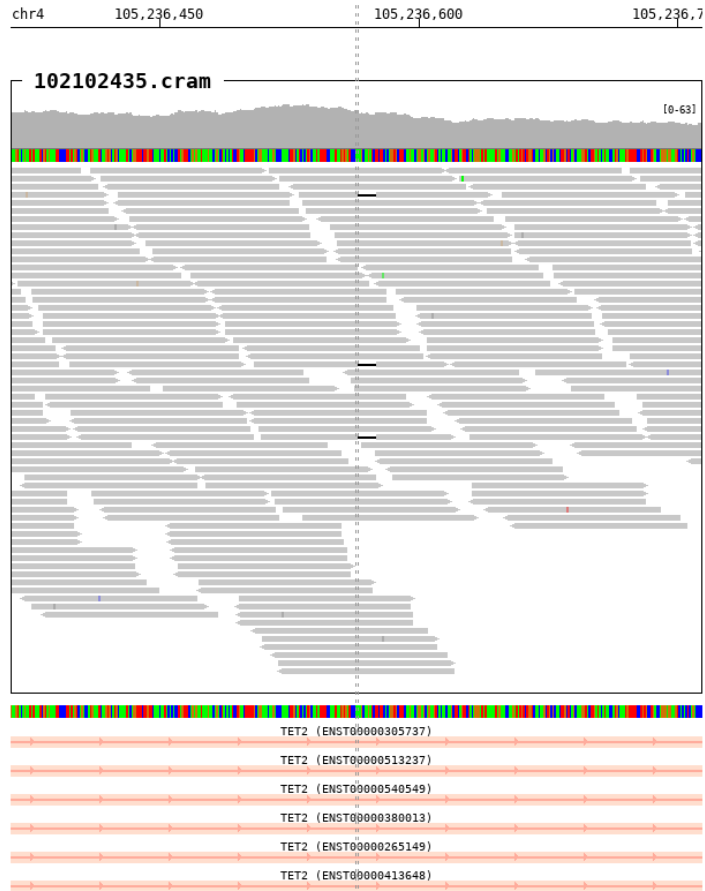

34.32. chr4\_105236588\_C/A

| SampleID | Variants (GRCh38)  | Ref_depth | Alt_depth | Gene | Consequence |
|----------|--------------------|-----------|-----------|------|-------------|
| 10931330 | chr4_105236588_C/A | 38        | 6         | TET2 | stop_gained |

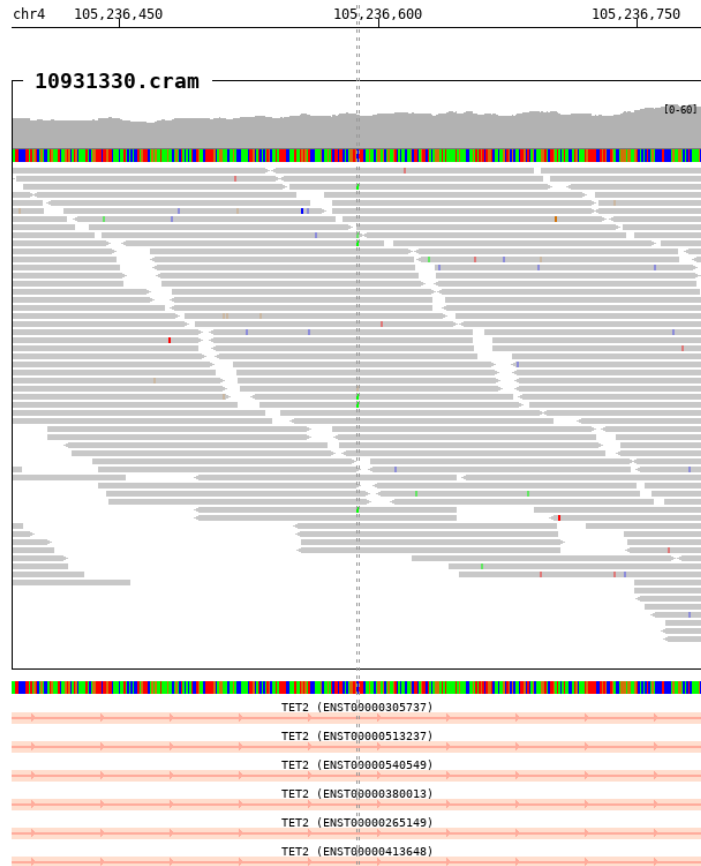

34.33. chr4\_105236769\_A/-

| SampleID | Variants (GRCh38)  | Ref_depth | Alt_depth | Gene | Consequence        |
|----------|--------------------|-----------|-----------|------|--------------------|
| 60611    | chr4_105236769_A/- | 20        | 4         | TET2 | frameshift_variant |

chr4 105,236,650 105,236,800 105,236,95

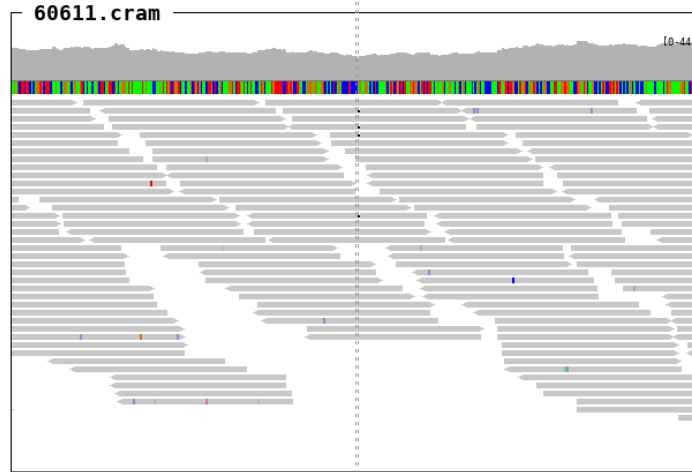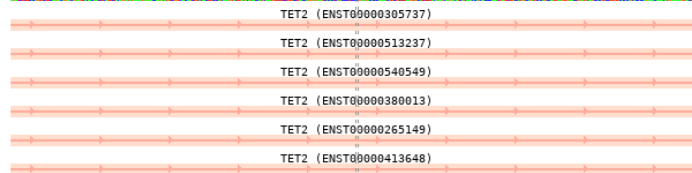

34.34. chr4\_105236781\_C/T

| SampleID | Variants (GRCh38)  | Ref_depth | Alt_depth | Gene | Consequence |
|----------|--------------------|-----------|-----------|------|-------------|
| 11050820 | chr4_105236781_C/T | 34        | 7         | TET2 | stop_gained |

chr4 105,236,650 105,236,800 105,236,950

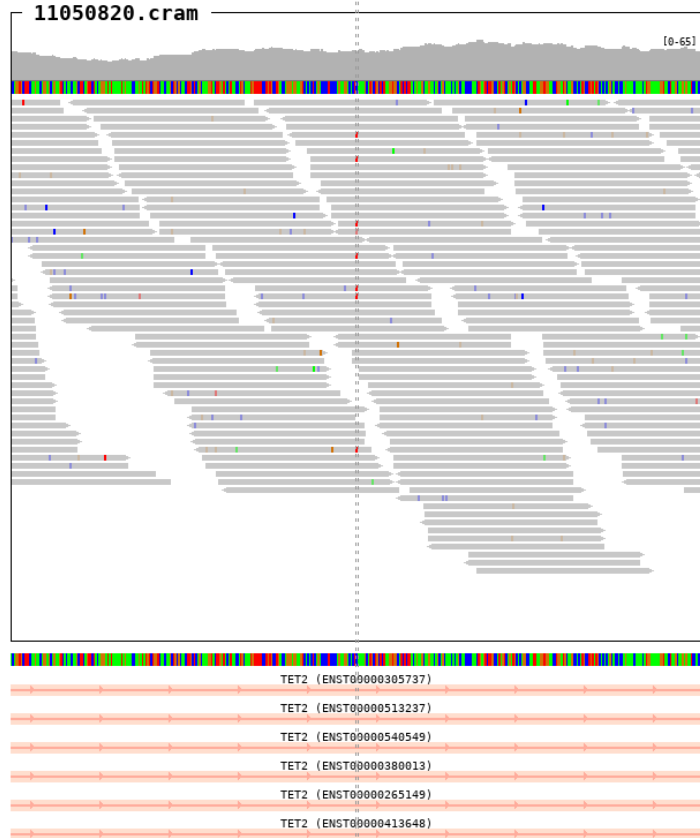

34.35. chr4\_105237000\_C/T

| SampleID   | Variants (GRCh38)  | Ref_depth | Alt_depth | Gene | Consequence |
|------------|--------------------|-----------|-----------|------|-------------|
| 1308262107 | chr4_105237000_C/T | 40        | 7         | TET2 | stop_gained |

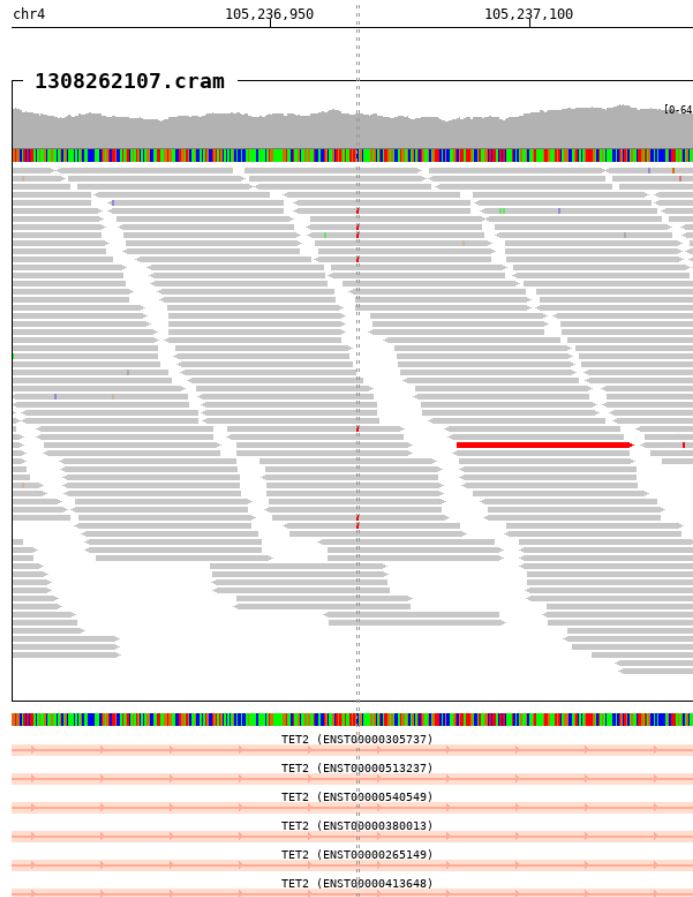

34.36. chr4\_105237091\_C/A

| SampleID | Variants (GRCh38)  | Ref_depth | Alt_depth | Gene | Consequence |
|----------|--------------------|-----------|-----------|------|-------------|
| 68758    | chr4_105237091_C/A | 39        | 5         | TET2 | stop_gained |

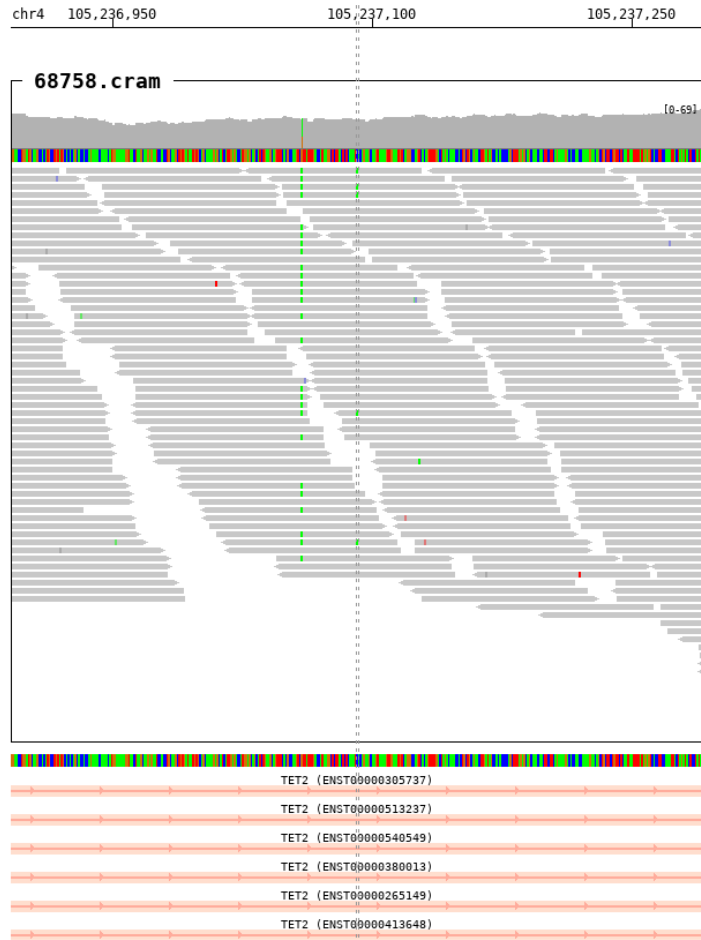

34.37. chr4\_105237118\_C/G

| SampleID  | Variants (GRCh38)  | Ref_depth | Alt_depth | Gene | Consequence |
|-----------|--------------------|-----------|-----------|------|-------------|
| 112401550 | chr4_105237118_C/G | 26        | 11        | TET2 | stop_gained |

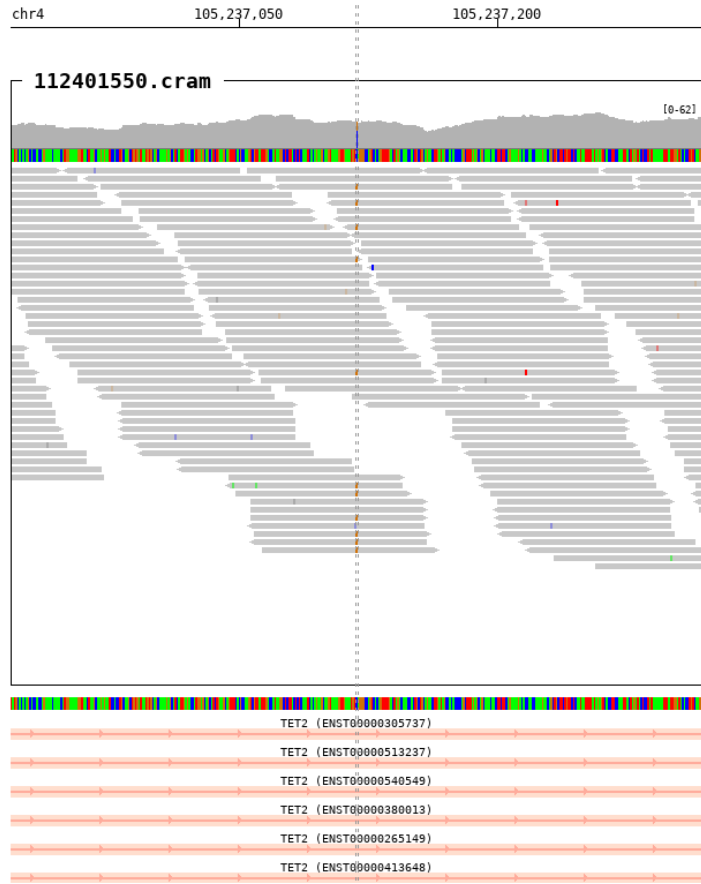

34.38. chr4\_105237189\_C/T

| SampleID  | Variants (GRCh38)  | Ref_depth | Alt_depth | Gene | Consequence |
|-----------|--------------------|-----------|-----------|------|-------------|
| 110100547 | chr4_105237189_C/T | 41        | 3         | TET2 | stop_gained |

chr4 105,237,050 105,237,200 105,237,350

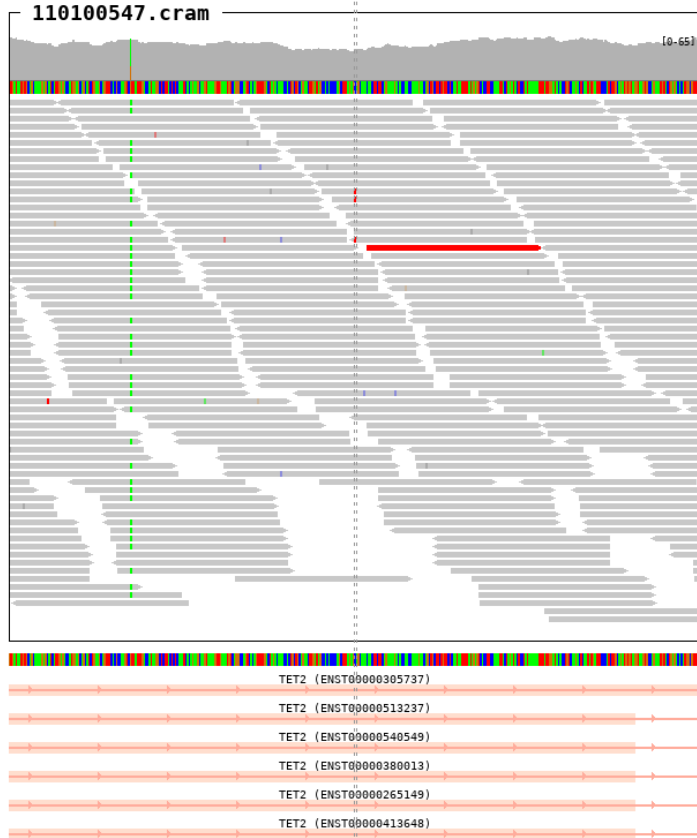

34.39. chr4\_105237205\_C/A

| SampleID  | Variants (GRCh38)  | Ref_depth | Alt_depth | Gene | Consequence |
|-----------|--------------------|-----------|-----------|------|-------------|
| 112400669 | chr4_105237205_C/A | 41        | 5         | TET2 | stop_gained |

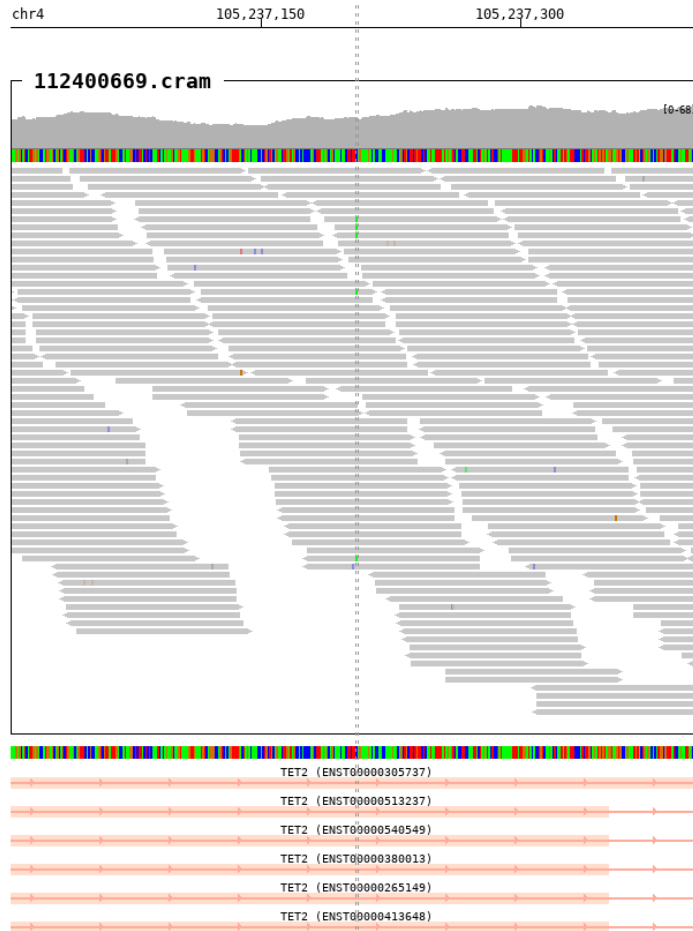

34.40. chr4\_105237284\_C/-

| SampleID  | Variants (GRCh38)  | Ref_depth | Alt_depth | Gene | Consequence        |
|-----------|--------------------|-----------|-----------|------|--------------------|
| 110105857 | chr4_105237284_C/- | 39        | 4         | TET2 | frameshift_variant |
| 67310     | chr4_105237284_C/- | 44        | 10        | TET2 | frameshift_variant |

chr4 105,237,150 105,237,300 105,237,450

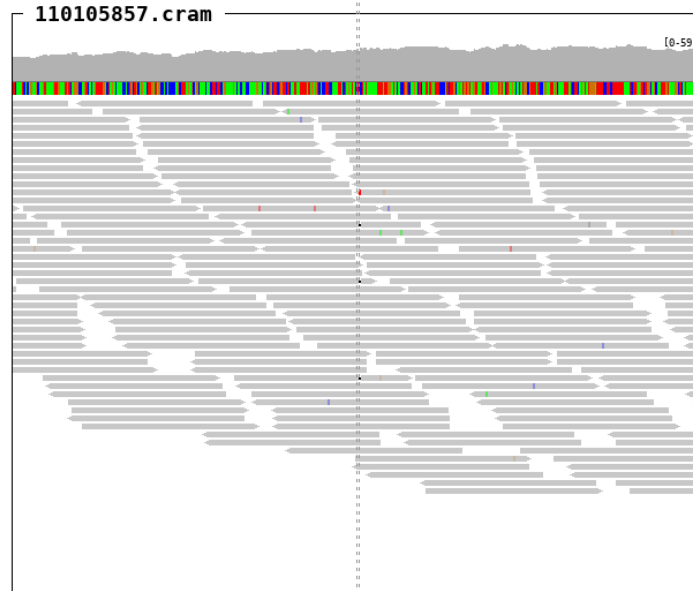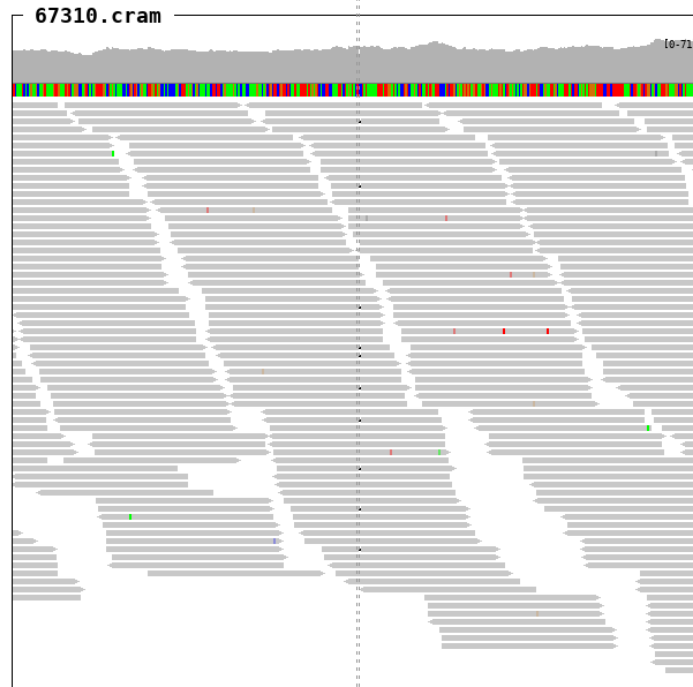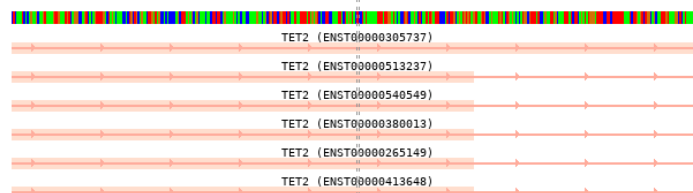

34.41. chr4\_105237353\_-/T

| SampleID  | Variants (GRCh38)  | Ref_depth | Alt_depth | Gene | Consequence          |
|-----------|--------------------|-----------|-----------|------|----------------------|
| 102104826 | chr4_105237353_-/T | 36        | 6         | TET2 | splice_donor_variant |

chr4 105,237,250 105,237,400 105,237,550

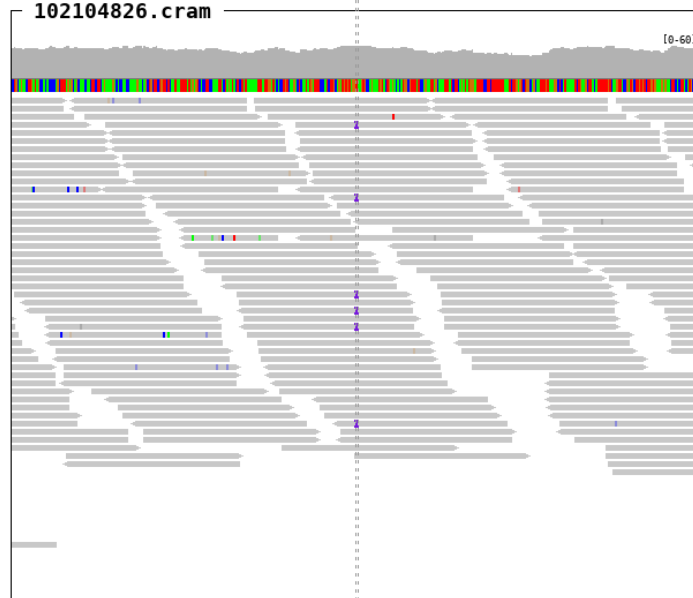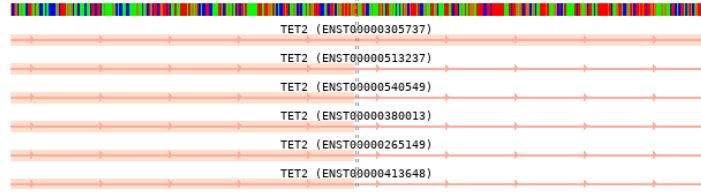

34.42. chr4\_105241341\_A/-

| SampleID | Variants (GRCh38)  | Ref_depth | Alt_depth | Gene | Consequence        |
|----------|--------------------|-----------|-----------|------|--------------------|
| 10010585 | chr4_105241341_A/- | 34        | 5         | TET2 | frameshift_variant |

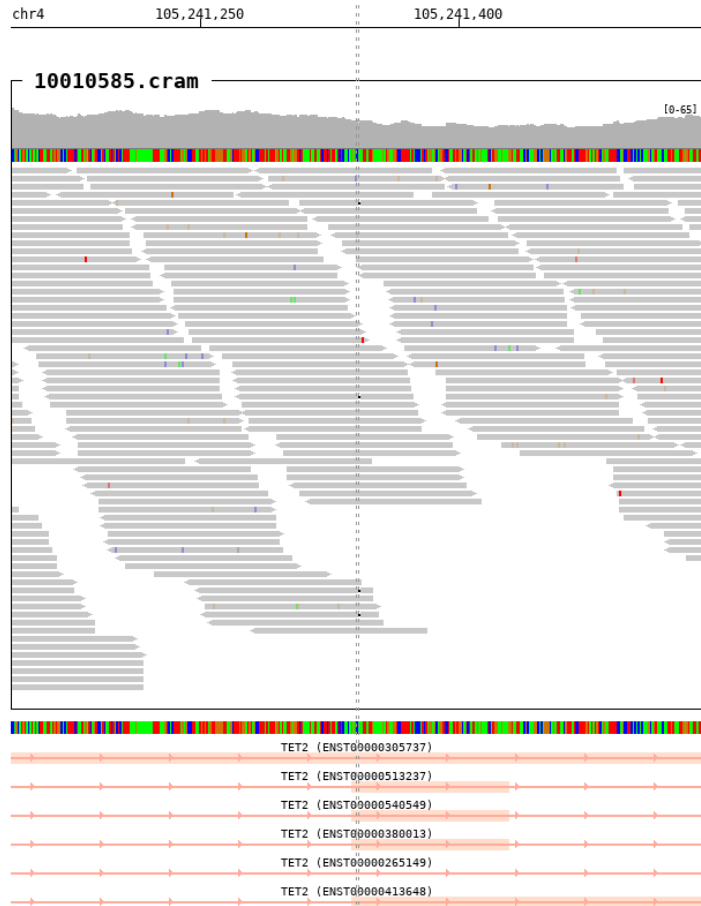

34.43. chr4\_105241379\_CTAGGAG/-

| SampleID  | Variants (GRCh38)        | Ref_depth | Alt_depth | Gene | Consequence        |
|-----------|--------------------------|-----------|-----------|------|--------------------|
| 110100533 | chr4_105241379_CTAGGAG/- | 46        | 7         | TET2 | frameshift_variant |

chr4 105,241,250 105,241,400 105,241,550

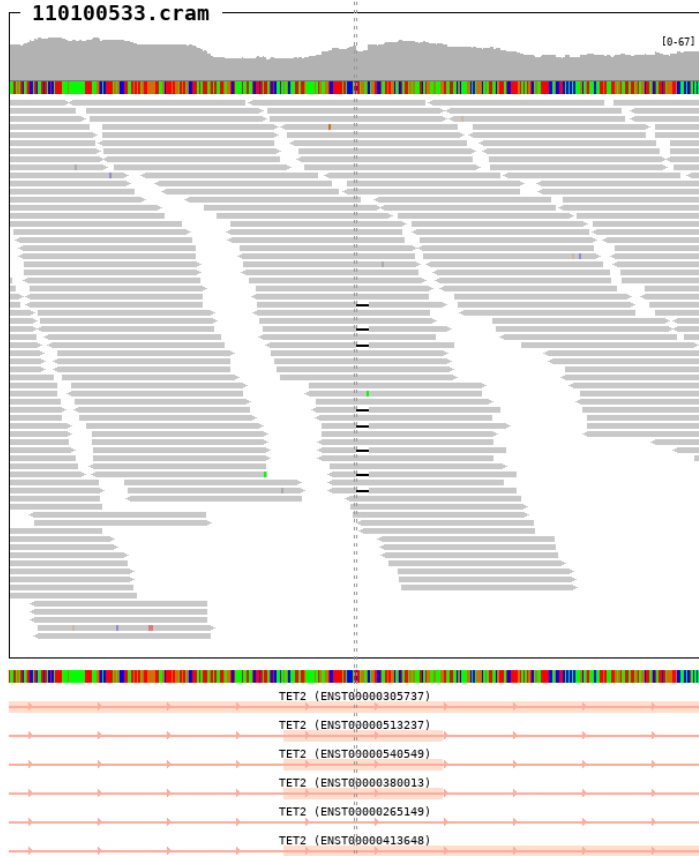

34.44. chr4\_105241399\_T/A

| SampleID  | Variants (GRCh38)  | Ref_depth | Alt_depth | Gene | Consequence      |
|-----------|--------------------|-----------|-----------|------|------------------|
| 111102643 | chr4_105241399_T/A | 49        | 5         | TET2 | missense_variant |

chr4 105,241,250 105,241,400 105,241,550

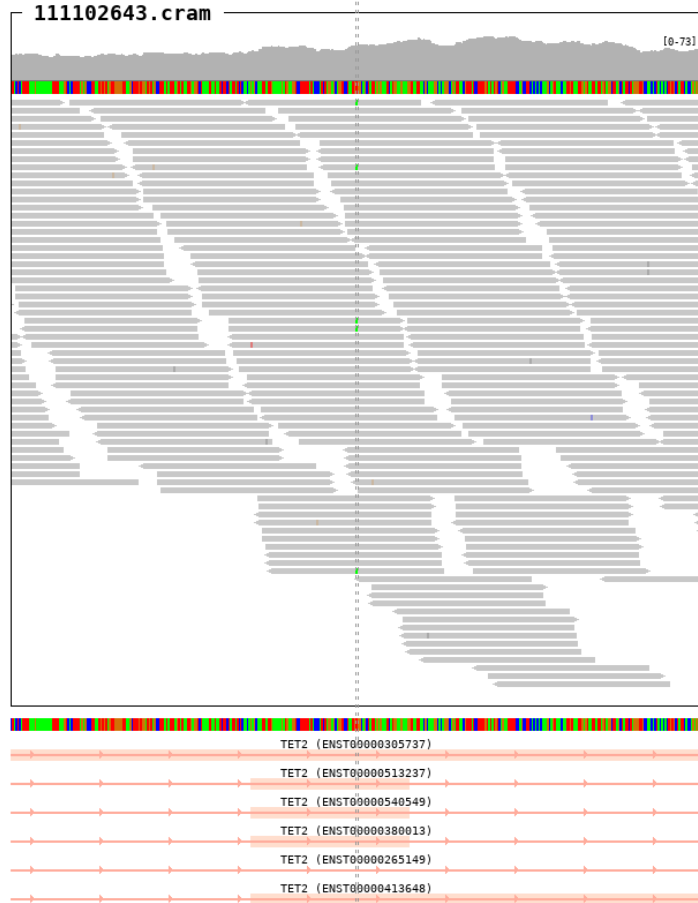

34.45. chr4\_105242838\_G/A

| SampleID | Variants (GRCh38)  | Ref_depth | Alt_depth | Gene | Consequence      |
|----------|--------------------|-----------|-----------|------|------------------|
| 10511972 | chr4_105242838_G/A | 30        | 6         | TET2 | missense_variant |

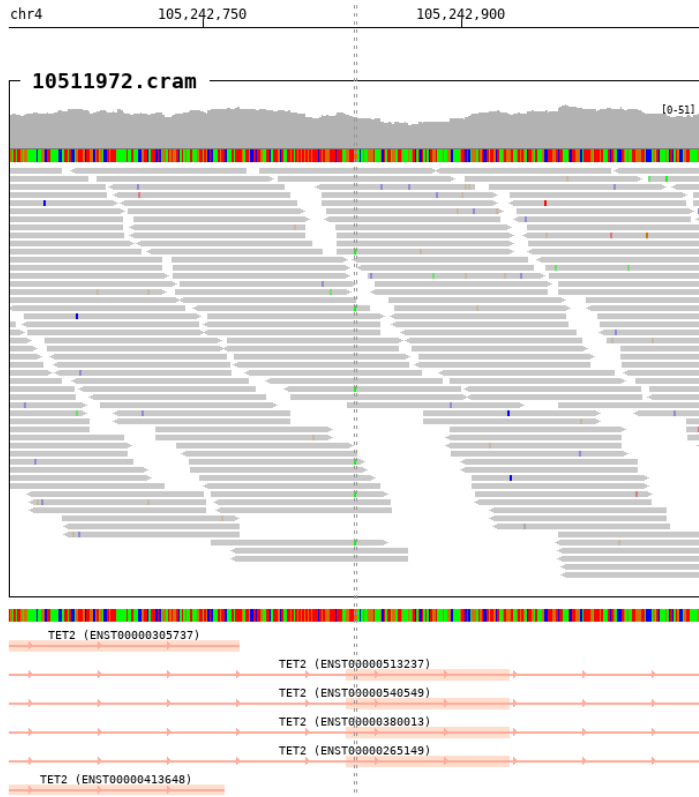

34.46. chr4\_105242911\_G/A

| SampleID  | Variants (GRCh38)  | Ref_depth | Alt_depth | Gene | Consequence      |
|-----------|--------------------|-----------|-----------|------|------------------|
| 100603207 | chr4_105242911_G/A | 41        | 4         | TET2 | missense_variant |

chr4 105,242,850 105,243,000

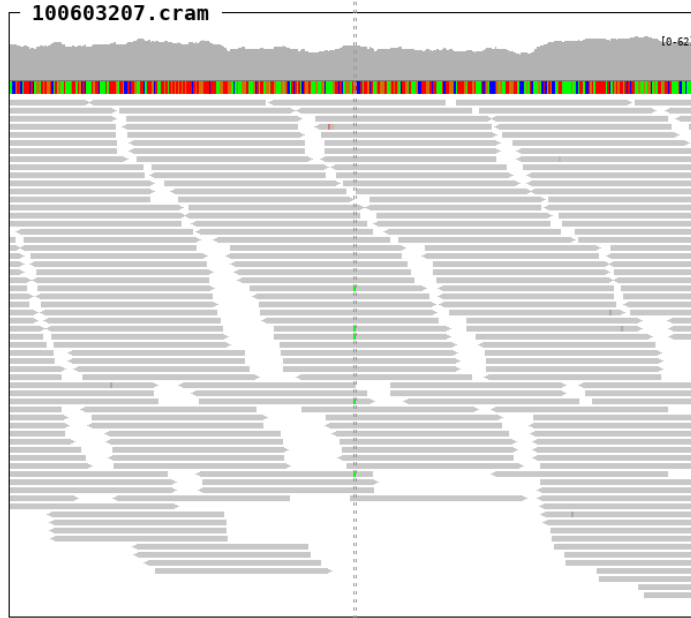

34.47. chr4\_105242914\_C/G

| SampleID  | Variants (GRCh38)  | Ref_depth | Alt_depth | Gene | Consequence      |
|-----------|--------------------|-----------|-----------|------|------------------|
| 112404222 | chr4_105242914_C/G | 26        | 8         | TET2 | missense_variant |

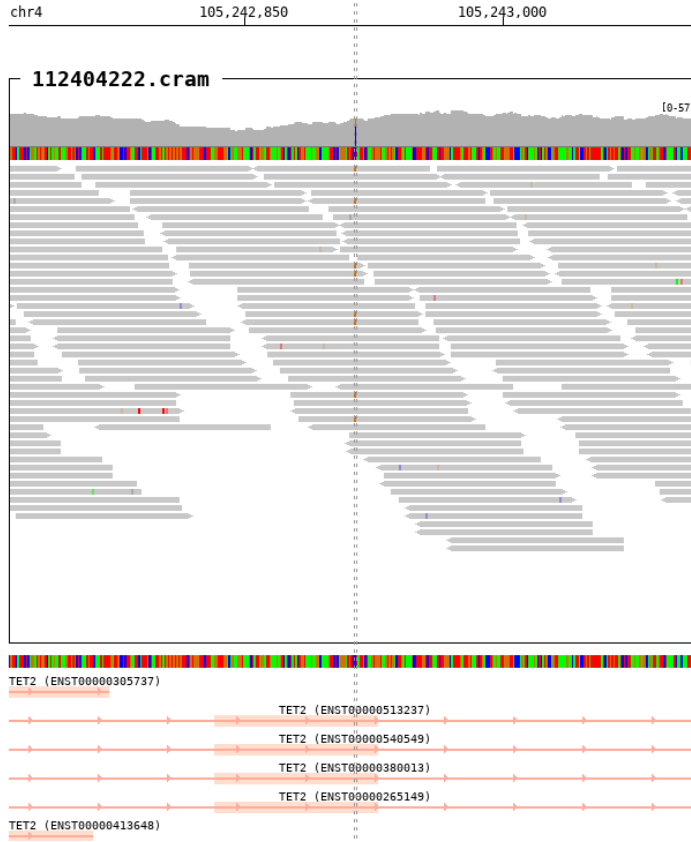

34.48. chr4\_105243569\_G/A

| SampleID | Variants (GRCh38)  | Ref_depth | Alt_depth | Gene | Consequence             |
|----------|--------------------|-----------|-----------|------|-------------------------|
| 61101    | chr4_105243569_G/A | 20        | 4         | TET2 | splice_acceptor_variant |

chr4 105,243,450 105,243,600 105,243,75

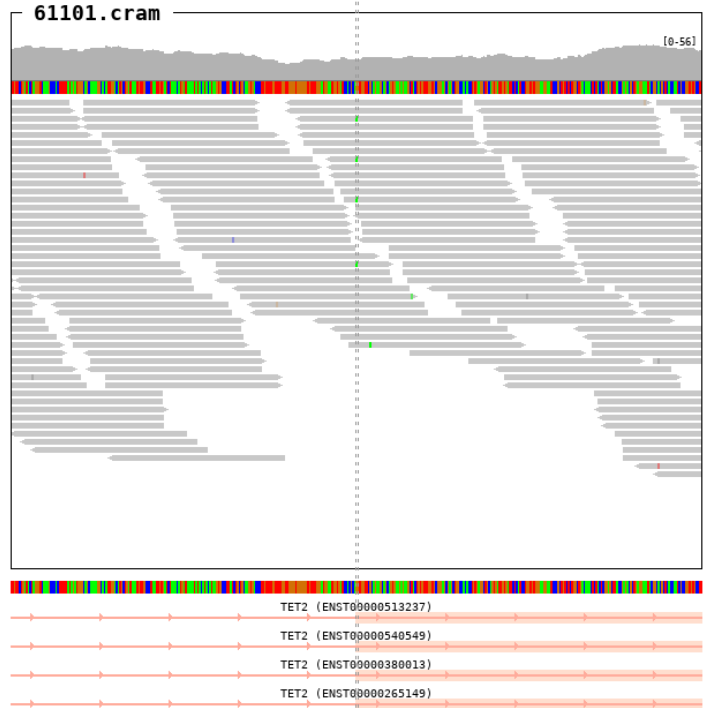

34.49. chr4\_105243574\_T/A

| SampleID  | Variants (GRCh38)  | Ref_depth | Alt_depth | Gene | Consequence      |
|-----------|--------------------|-----------|-----------|------|------------------|
| 101603122 | chr4_105243574_T/A | 22        | 6         | TET2 | missense_variant |

chr4 105,243,450 105,243,600 105,243,750

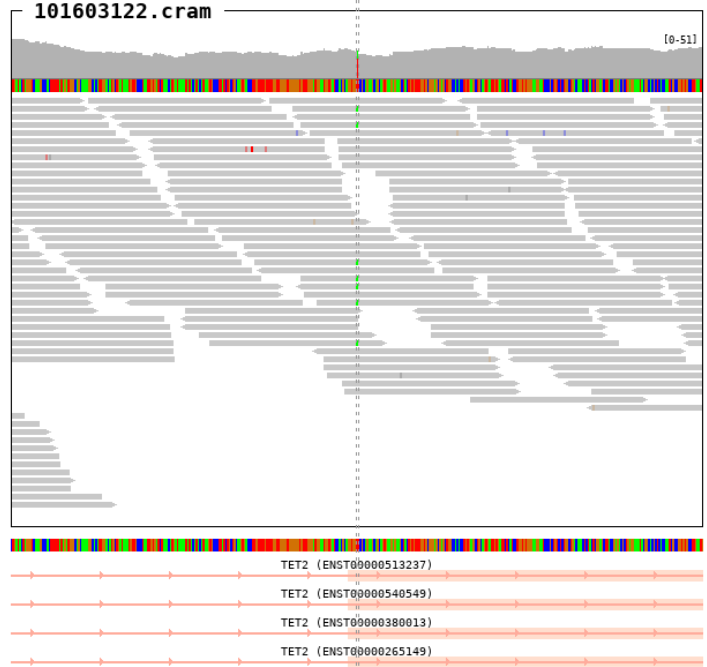

34.50. chr4\_105243616\_G/A

| SampleID   | Variants (GRCh38)  | Ref_depth | Alt_depth | Gene | Consequence      |
|------------|--------------------|-----------|-----------|------|------------------|
| 4501262102 | chr4_105243616_G/A | 45        | 3         | TET2 | missense_variant |

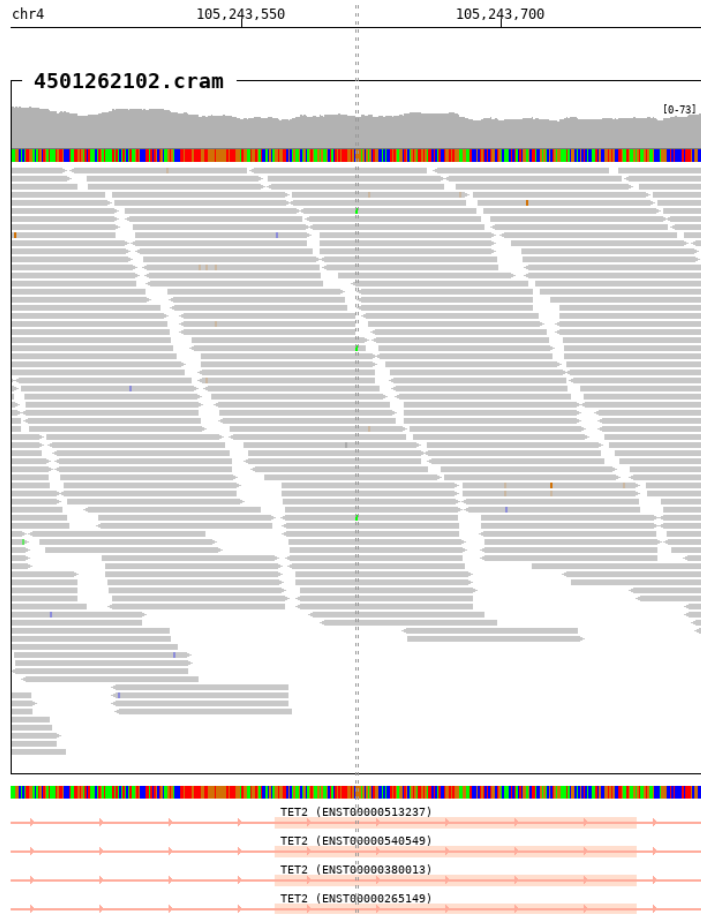

34.51. chr4\_105243621\_C/T

| SampleID  | Variants (GRCh38)  | Ref_depth | Alt_depth | Gene | Consequence |
|-----------|--------------------|-----------|-----------|------|-------------|
| 112301609 | chr4_105243621_C/T | 30        | 4         | TET2 | stop_gained |

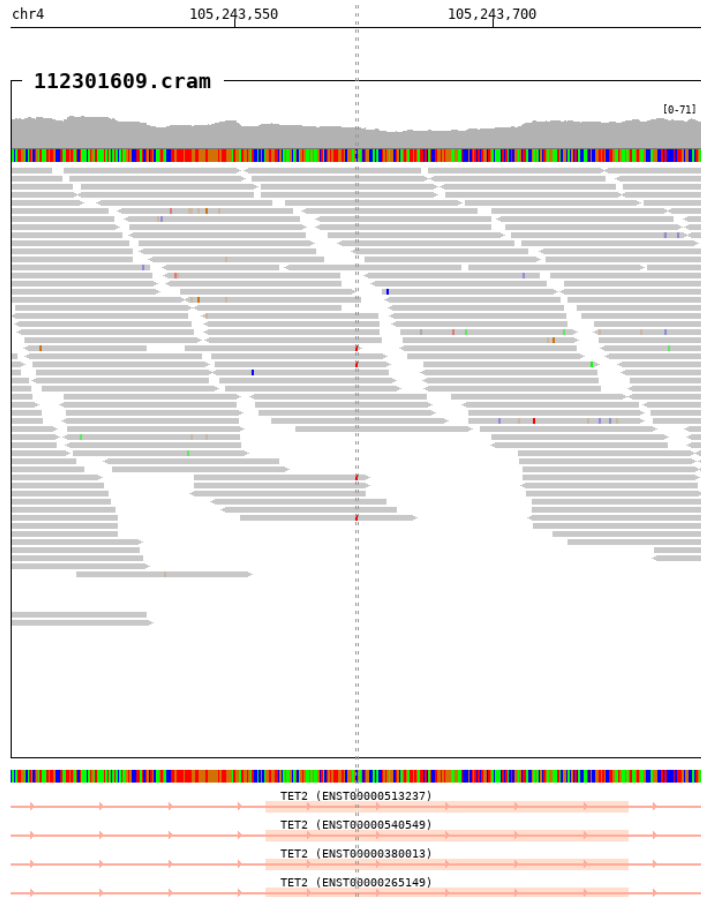

34.52. chr4\_105243622\_G/A

| SampleID | Variants (GRCh38)  | Ref_depth | Alt_depth | Gene | Consequence      |
|----------|--------------------|-----------|-----------|------|------------------|
| 60763    | chr4_105243622_G/A | 31        | 12        | TET2 | missense_variant |

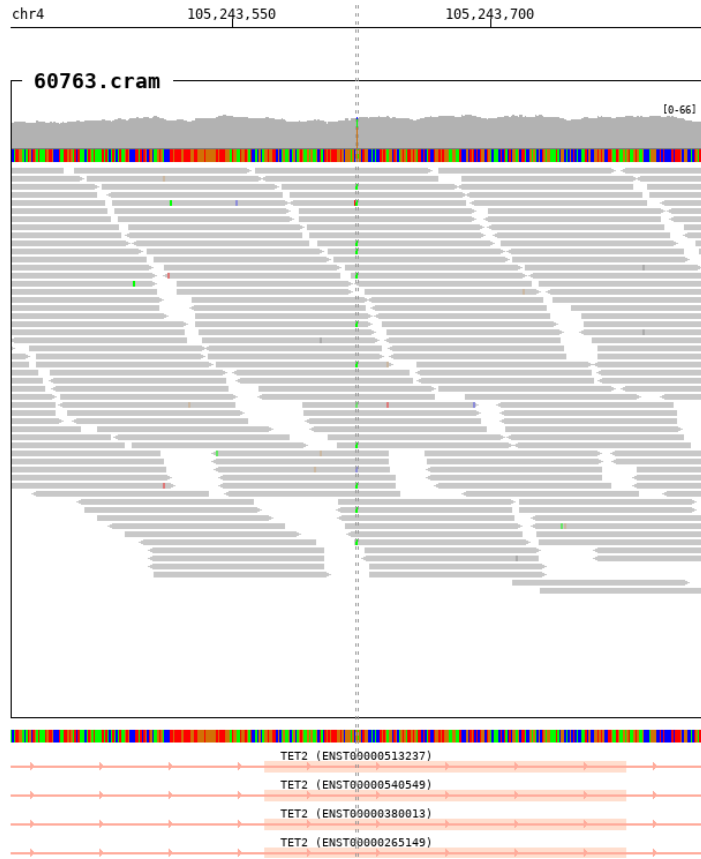

34.53. chr4\_105243637\_G/A

| SampleID  | Variants (GRCh38)  | Ref_depth | Alt_depth | Gene | Consequence      |
|-----------|--------------------|-----------|-----------|------|------------------|
| 100601346 | chr4_105243637_G/A | 30        | 6         | TET2 | missense_variant |

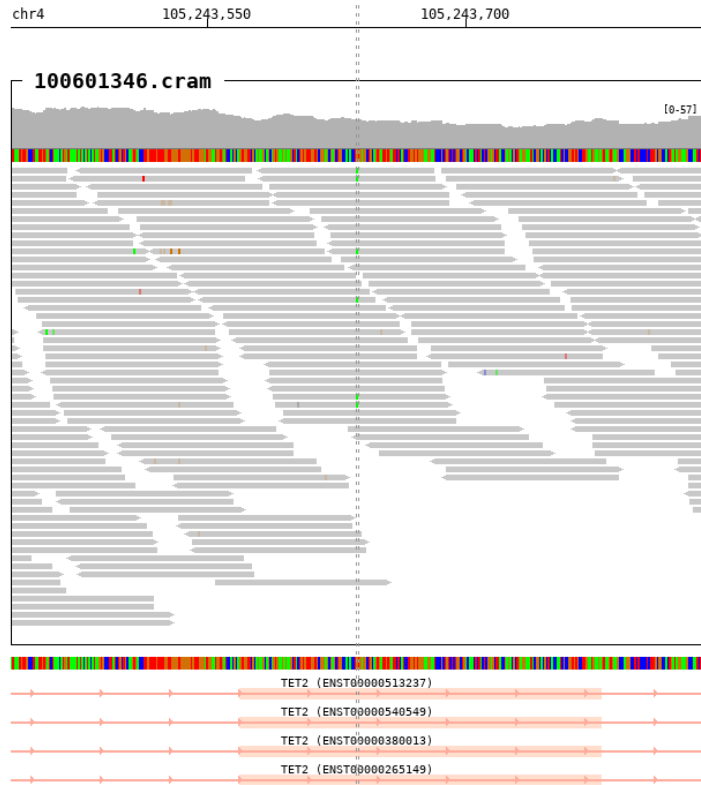

34.54. chr4\_105243682\_C/-

| SampleID  | Variants (GRCh38)  | Ref_depth | Alt_depth | Gene | Consequence        |
|-----------|--------------------|-----------|-----------|------|--------------------|
| 101106908 | chr4_105243682_C/- | 24        | 4         | TET2 | frameshift_variant |

chr4 105,243,550 105,243,700 105,243,850

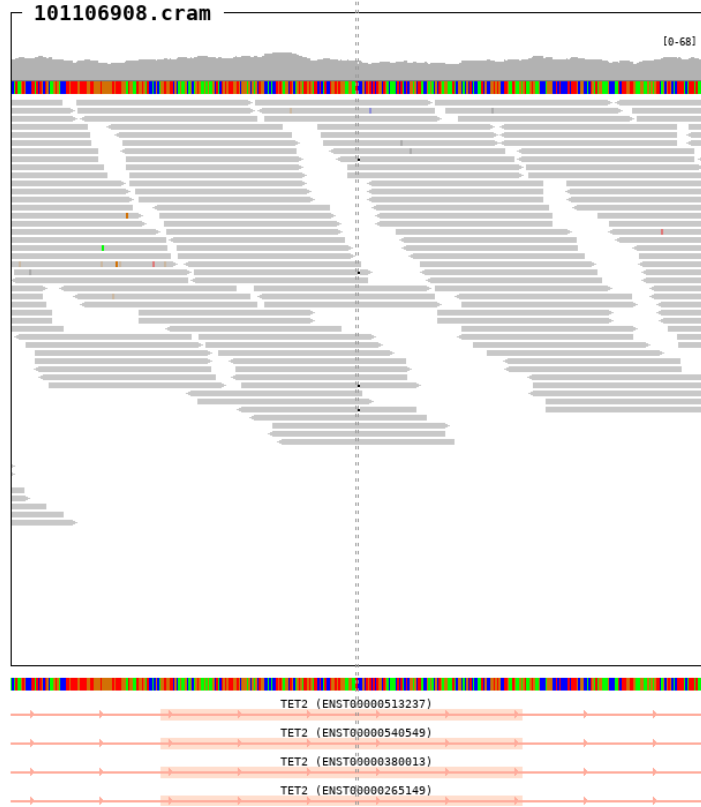

34.55. chr4\_105243706\_T/C

| SampleID | Variants (GRCh38)  | Ref_depth | Alt_depth | Gene | Consequence      |
|----------|--------------------|-----------|-----------|------|------------------|
| 12390009 | chr4_105243706_T/C | 38        | 11        | TET2 | missense_variant |

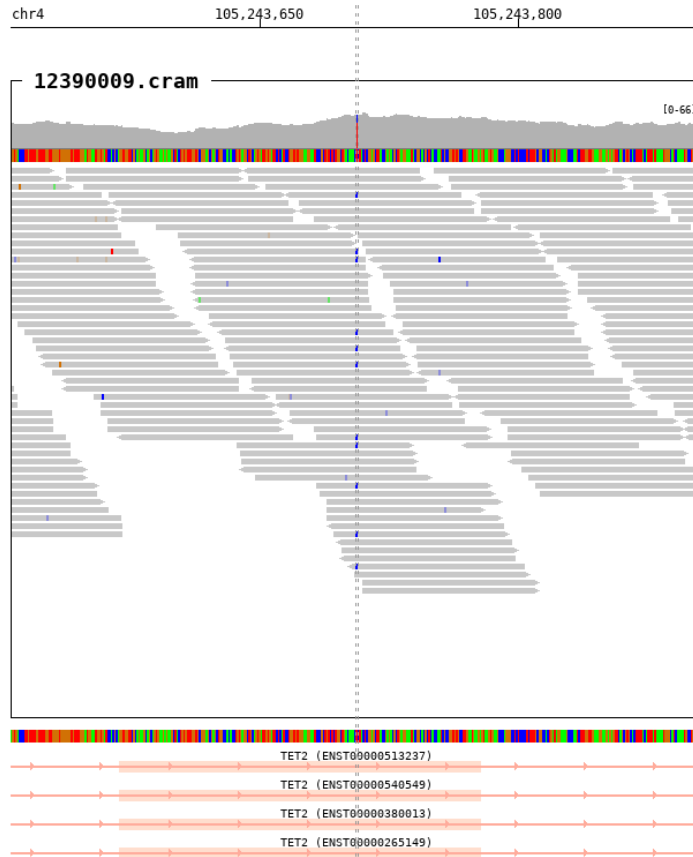

34.56. chr4\_105243757\_G/A

| SampleID  | Variants (GRCh38)  | Ref_depth | Alt_depth | Gene | Consequence      |
|-----------|--------------------|-----------|-----------|------|------------------|
| 111100445 | chr4_105243757_G/A | 34        | 5         | TET2 | missense_variant |

chr4 105,243,650 105,243,800 105,243

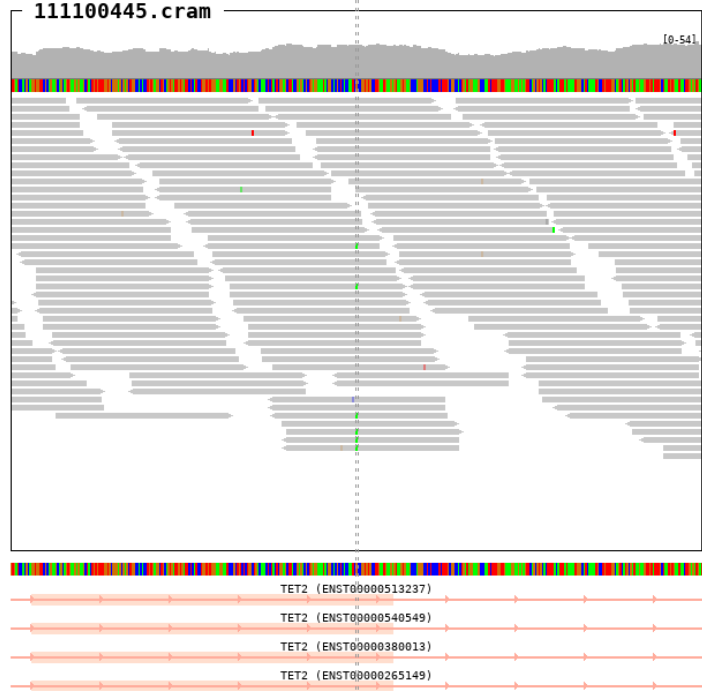

34.57. chr4\_105243759\_C/T

| SampleID  | Variants (GRCh38)  | Ref_depth | Alt_depth | Gene | Consequence      |
|-----------|--------------------|-----------|-----------|------|------------------|
| 112405430 | chr4_105243759_C/T | 28        | 5         | TET2 | missense_variant |

chr4 105,243,650 105,243,800 105,243,800

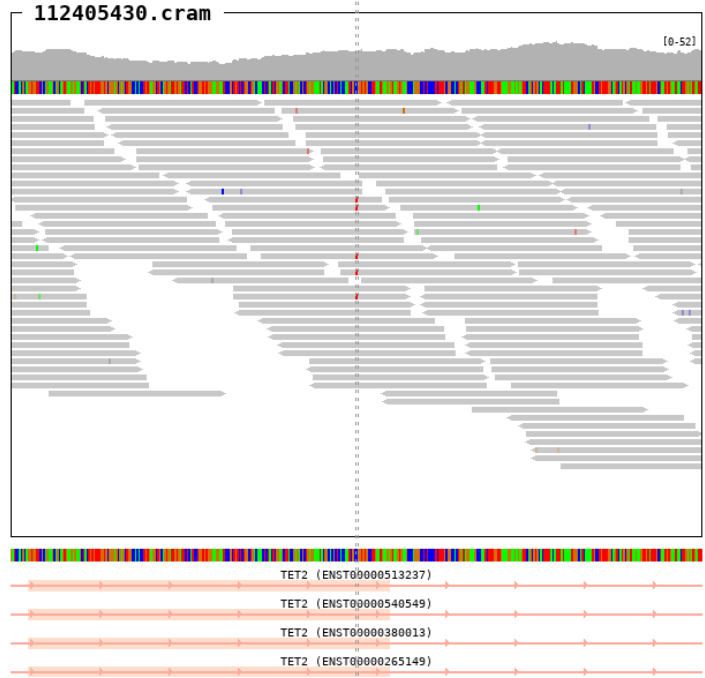

34.58. chr4\_105243760\_G/A

| SampleID | Variants (GRCh38)  | Ref_depth | Alt_depth | Gene | Consequence      |
|----------|--------------------|-----------|-----------|------|------------------|
| 61462    | chr4_105243760_G/A | 72        | 5         | TET2 | missense_variant |

chr4 105,243,650 105,243,800 105,243,

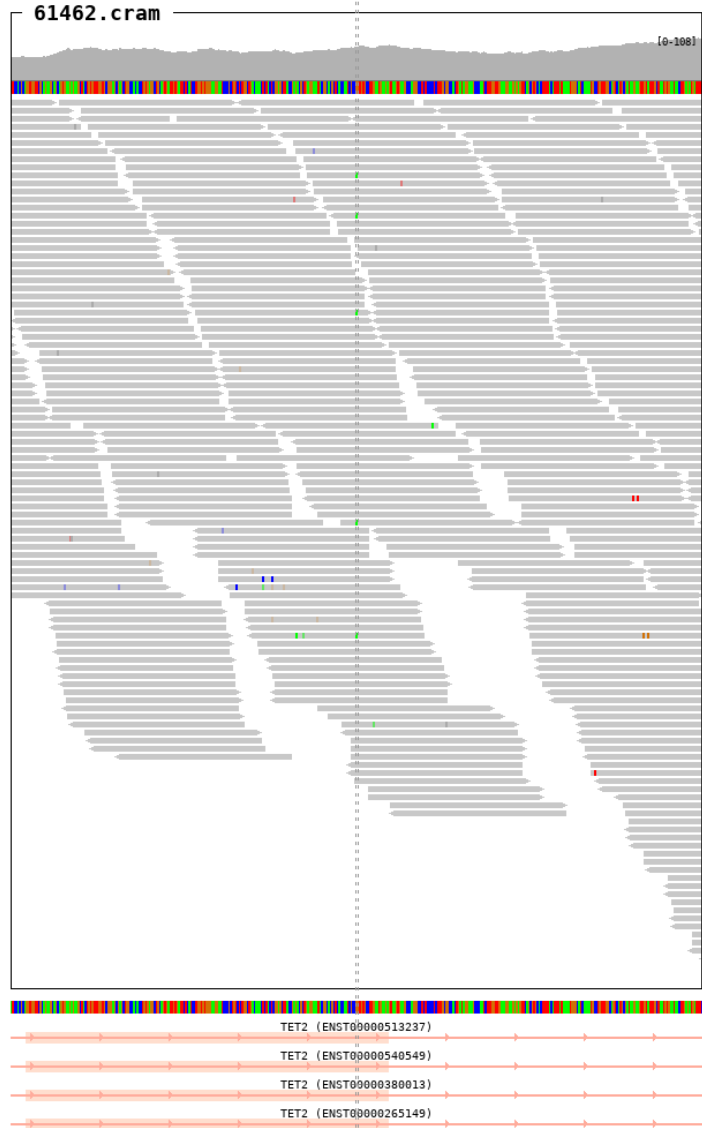

34.59. chr4\_105243772\_A/G

| SampleID | Variants (GRCh38)  | Ref_depth | Alt_depth | Gene | Consequence      |
|----------|--------------------|-----------|-----------|------|------------------|
| 66858    | chr4_105243772_A/G | 50        | 4         | TET2 | missense_variant |

chr4 105,243,650 105,243,800 105,243,950

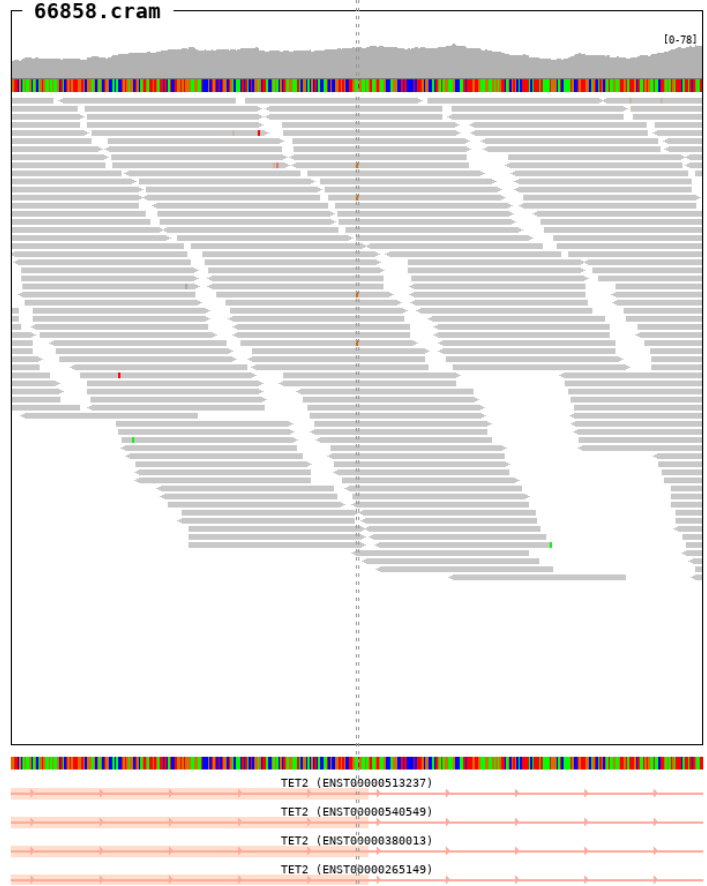

34.60. chr4\_105259628\_C/G

| SampleID | Variants (GRCh38)  | Ref_depth | Alt_depth | Gene | Consequence      |
|----------|--------------------|-----------|-----------|------|------------------|
| 10010635 | chr4_105259628_C/G | 48        | 7         | TET2 | missense_variant |

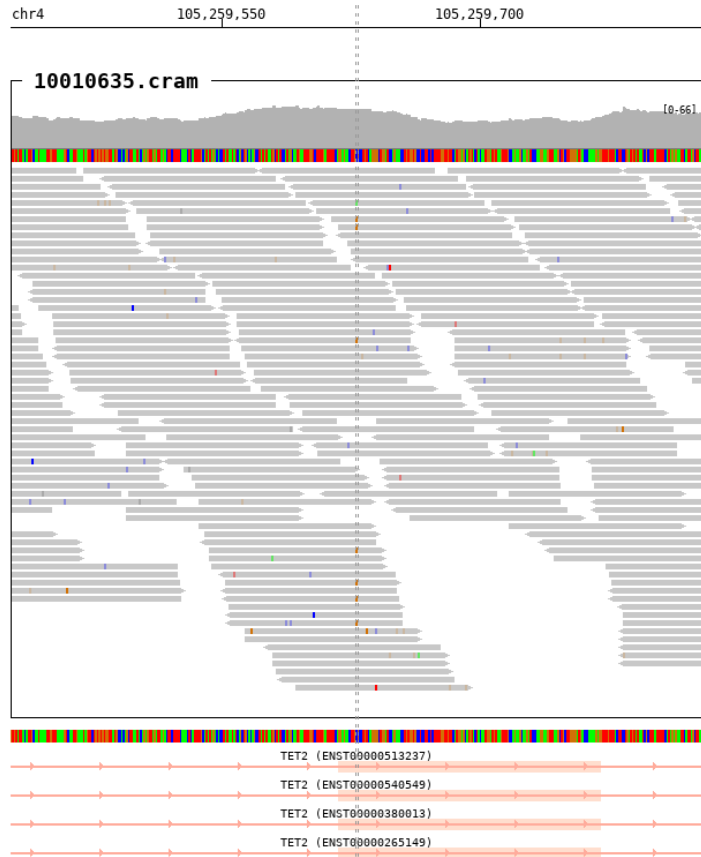

34.61. chr4\_105259660\_G/A

| SampleID   | Variants (GRCh38)  | Ref_depth | Alt_depth | Gene | Consequence      |
|------------|--------------------|-----------|-----------|------|------------------|
| 5401274112 | chr4_105259660_G/A | 35        | 13        | TET2 | missense_variant |

chr4 105,259,550 105,259,700 105,259,850

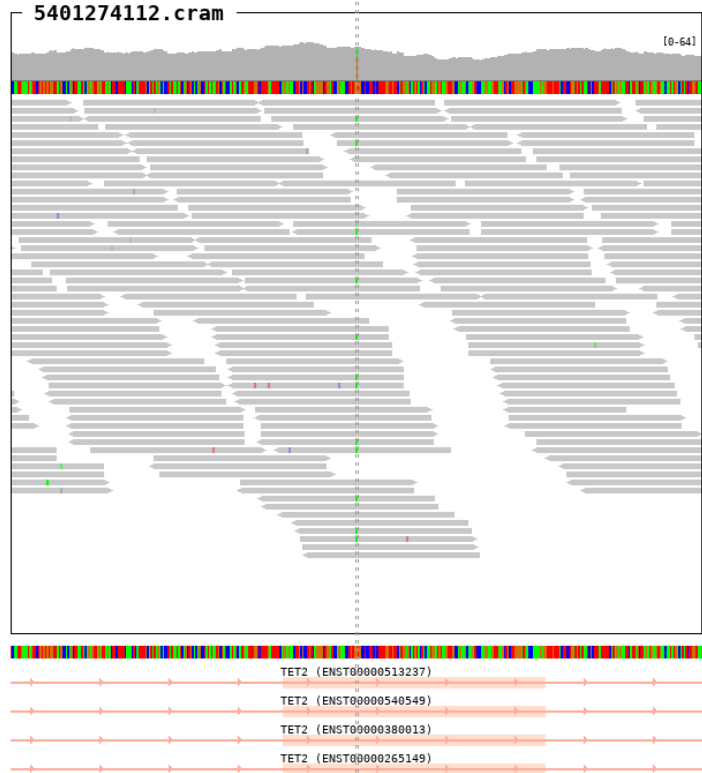

34.62. chr4\_105259672\_C/G

| SampleID  | Variants (GRCh38)  | Ref_depth | Alt_depth | Gene | Consequence      |
|-----------|--------------------|-----------|-----------|------|------------------|
| 112401955 | chr4_105259672_C/G | 46        | 3         | TET2 | missense_variant |

chr4 105,259,550 105,259,700 105,259,850

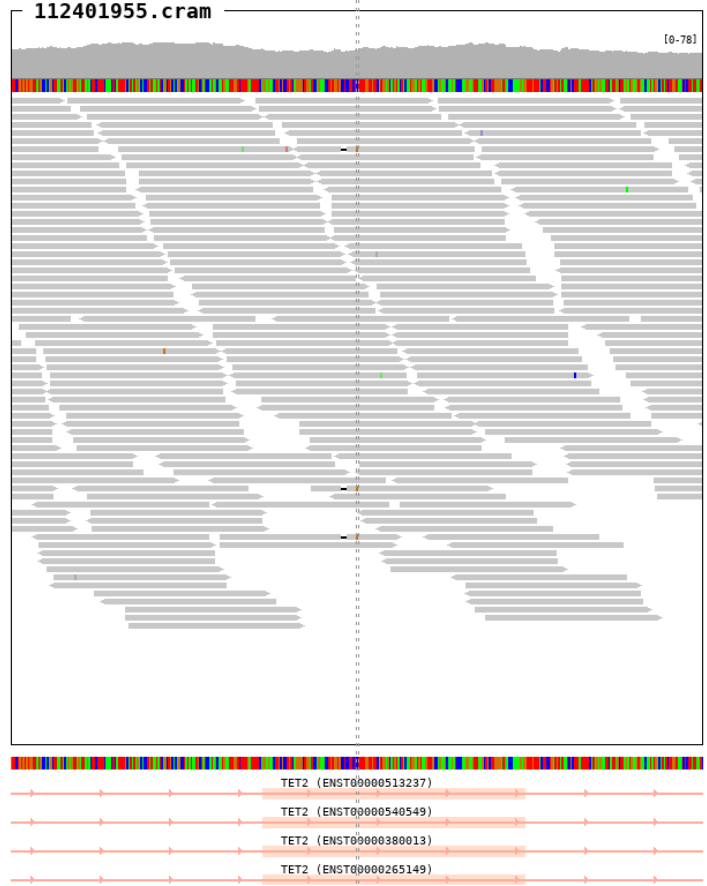

34.63. chr4\_105259705\_G/A

| SampleID  | Variants (GRCh38)  | Ref_depth | Alt_depth | Gene | Consequence      |
|-----------|--------------------|-----------|-----------|------|------------------|
| 102104826 | chr4_105259705_G/A | 38        | 3         | TET2 | missense_variant |

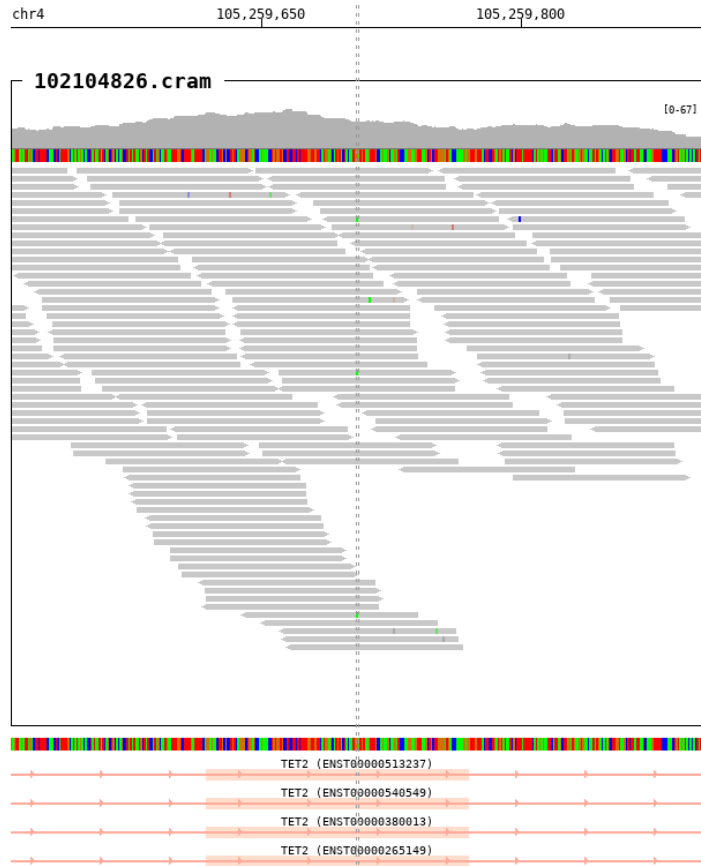

34.64. chr4\_105259717\_C/A

| SampleID | Variants (GRCh38)  | Ref_depth | Alt_depth | Gene | Consequence      |
|----------|--------------------|-----------|-----------|------|------------------|
| 12390145 | chr4_105259717_C/A | 36        | 12        | TET2 | missense_variant |

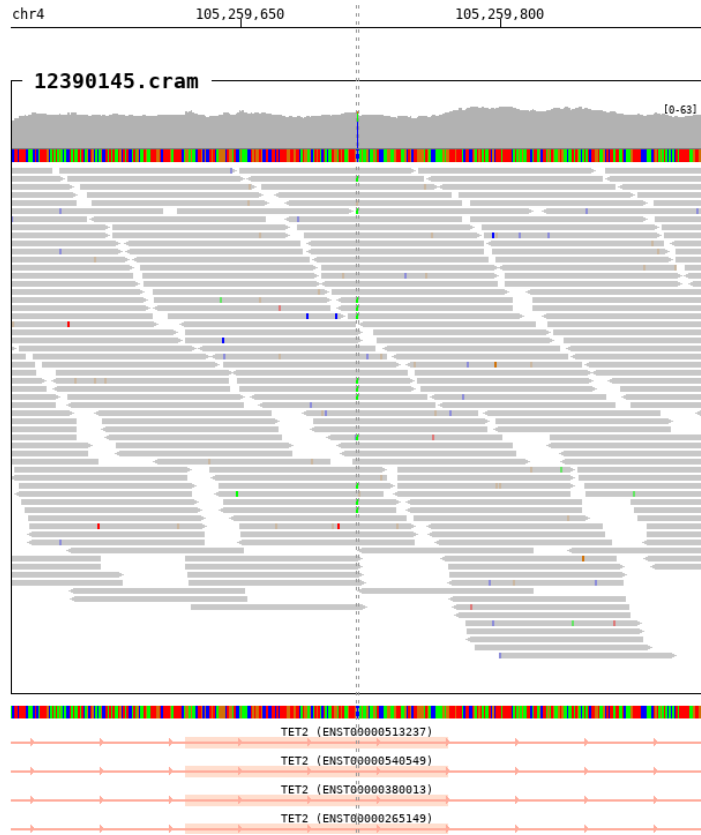

34.65. chr4\_105261757\_A/T

| SampleID  | Variants (GRCh38)  | Ref_depth | Alt_depth | Gene | Consequence             |
|-----------|--------------------|-----------|-----------|------|-------------------------|
| 110106264 | chr4_105261757_A/T | 37        | 4         | TET2 | splice_acceptor_variant |

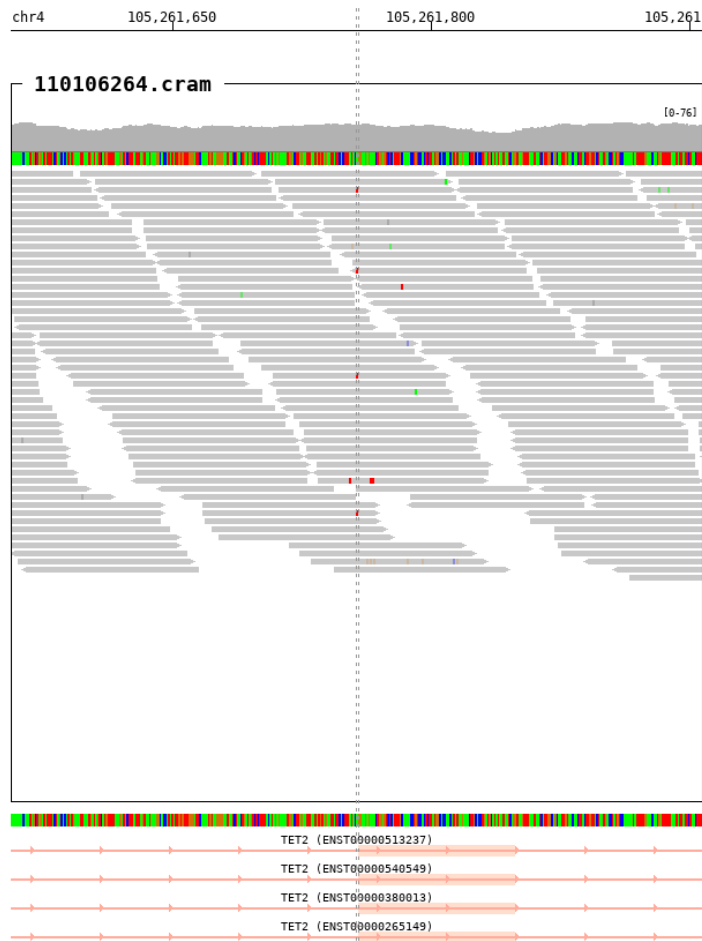

34.66. chr4\_105261769\_T/C

| SampleID | Variants (GRCh38)  | Ref_depth | Alt_depth | Gene | Consequence      |
|----------|--------------------|-----------|-----------|------|------------------|
| 10011430 | chr4_105261769_T/C | 34        | 4         | TET2 | missense_variant |

chr4 105,261,650 105,261,800 105,261,95

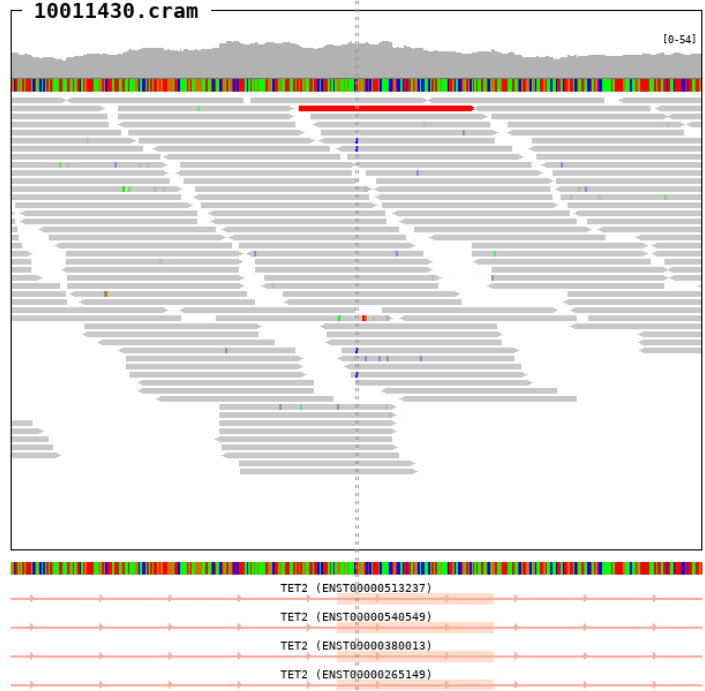

34.67. chr4\_105261769\_T/A

| SampleID  | Variants (GRCh38)  | Ref_depth | Alt_depth | Gene | Consequence      |
|-----------|--------------------|-----------|-----------|------|------------------|
| 112300382 | chr4_105261769_T/A | 37        | 3         | TET2 | missense_variant |

chr4 105,261,650 105,261,800 105,261,95

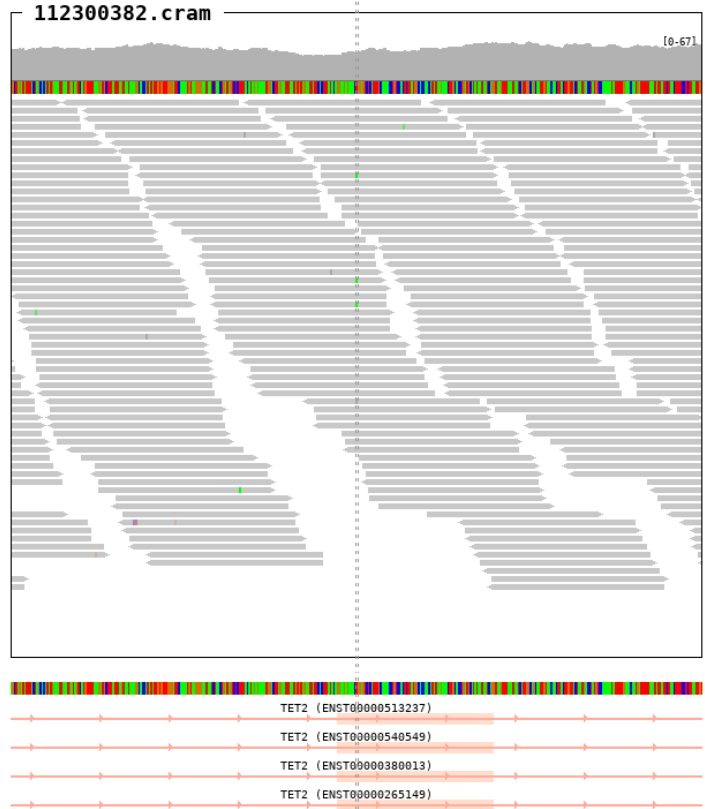

34.68. chr4\_105261778\_T/-

| SampleID | Variants (GRCh38)  | Ref_depth | Alt_depth | Gene | Consequence        |
|----------|--------------------|-----------|-----------|------|--------------------|
| 11540194 | chr4_105261778_T/- | 41        | 8         | TET2 | frameshift_variant |

chr4 105,261,650 105,261,800 105,261,950

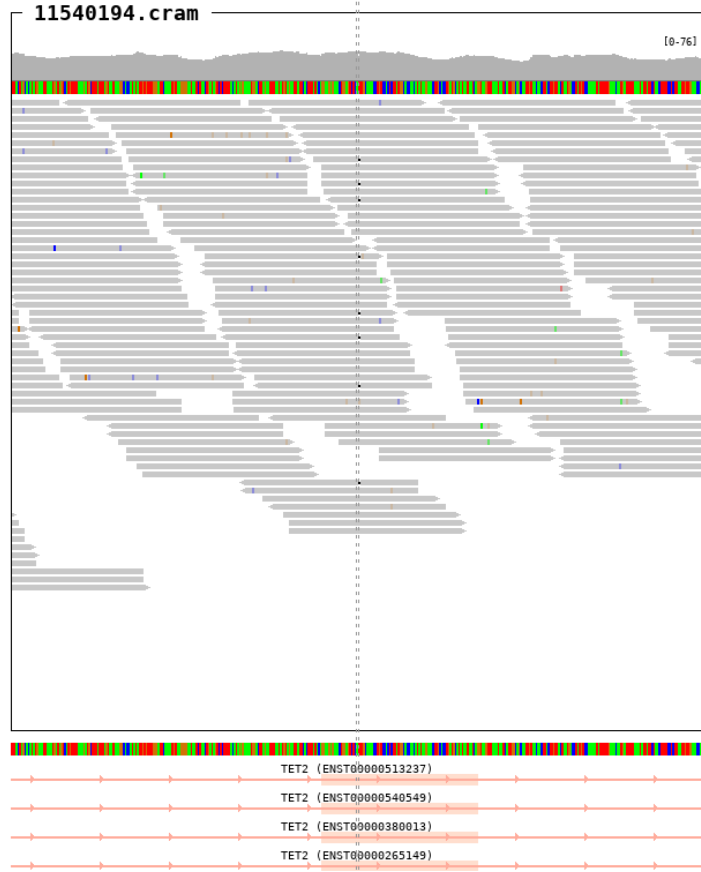

34.69. chr4\_105261815\_T/A

| SampleID  | Variants (GRCh38)  | Ref_depth | Alt_depth | Gene | Consequence |
|-----------|--------------------|-----------|-----------|------|-------------|
| 112401550 | chr4_105261815_T/A | 33        | 3         | TET2 | stop_gained |

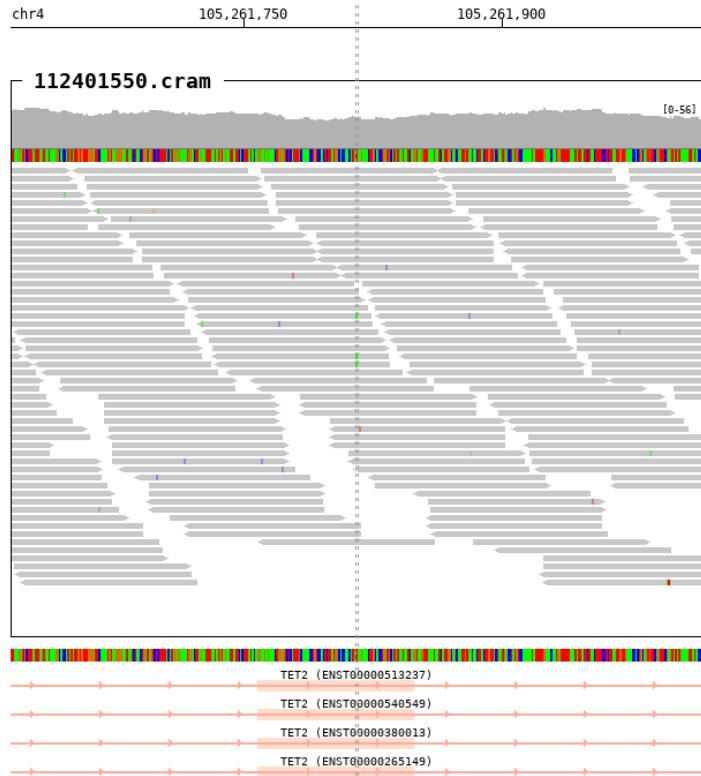

34.70. chr4\_105261823\_-/T

| SampleID | Variants (GRCh38)  | Ref_depth | Alt_depth | Gene | Consequence        |
|----------|--------------------|-----------|-----------|------|--------------------|
| 12390262 | chr4_105261823_-/T | 29        | 6         | TET2 | frameshift_variant |

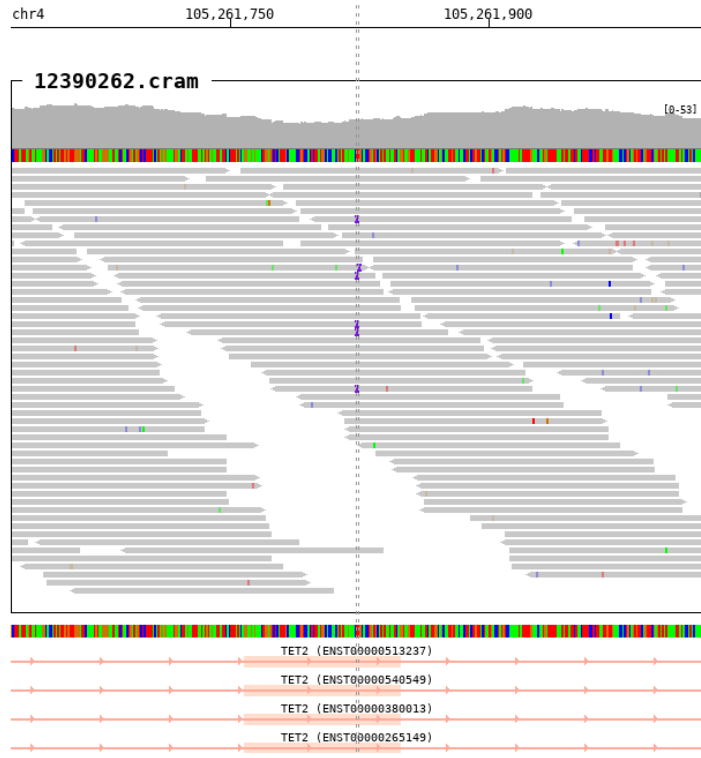

34.71. chr4\_105269619\_G/A

| SampleID  | Variants (GRCh38)  | Ref_depth | Alt_depth | Gene | Consequence      |
|-----------|--------------------|-----------|-----------|------|------------------|
| 101606133 | chr4_105269619_G/A | 31        | 14        | TET2 | missense_variant |

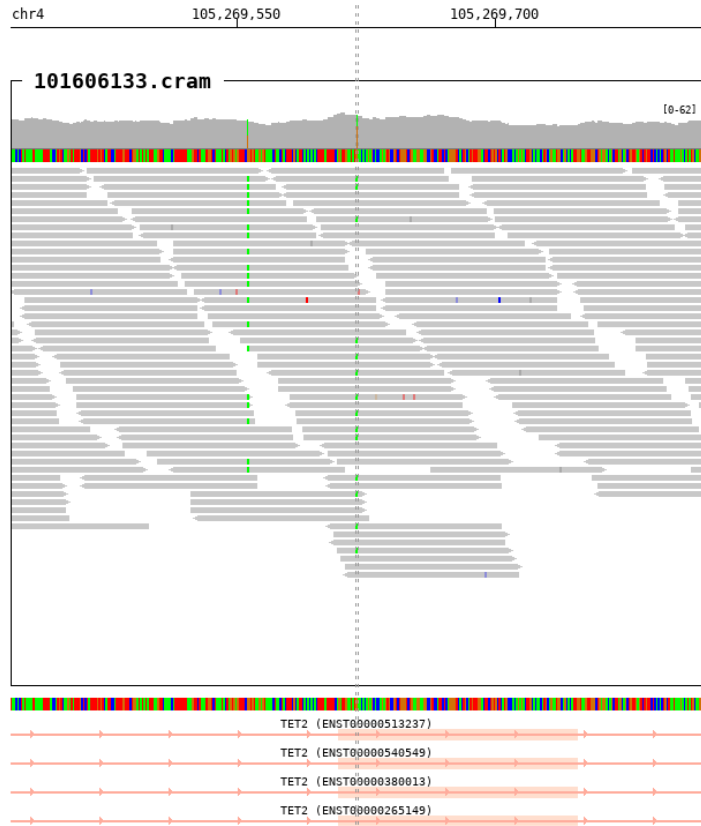

34.72. chr4\_105269623\_CAGAGCACCAGAGTGCC/-

| SampleID  | Variants (GRCh38)                  | Ref_depth | Alt_depth | Gene | Consequence        |
|-----------|------------------------------------|-----------|-----------|------|--------------------|
| 101105102 | chr4_105269623_CAGAGCACCAGAGTGCC/- | 51        | 5         | TET2 | frameshift_variant |

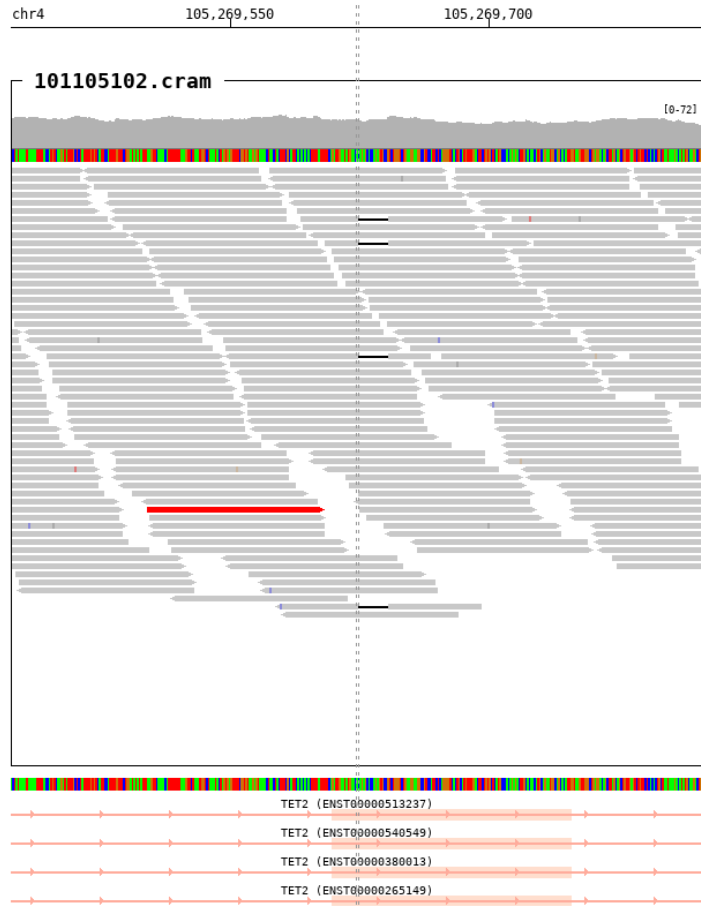

34.73. chr4\_105269640\_C/T

| SampleID  | Variants (GRCh38)  | Ref_depth | Alt_depth | Gene | Consequence      |
|-----------|--------------------|-----------|-----------|------|------------------|
| 112304693 | chr4_105269640_C/T | 38        | 4         | TET2 | missense_variant |
| 12390074  | chr4_105269640_C/T | 42        | 5         | TET2 | missense_variant |

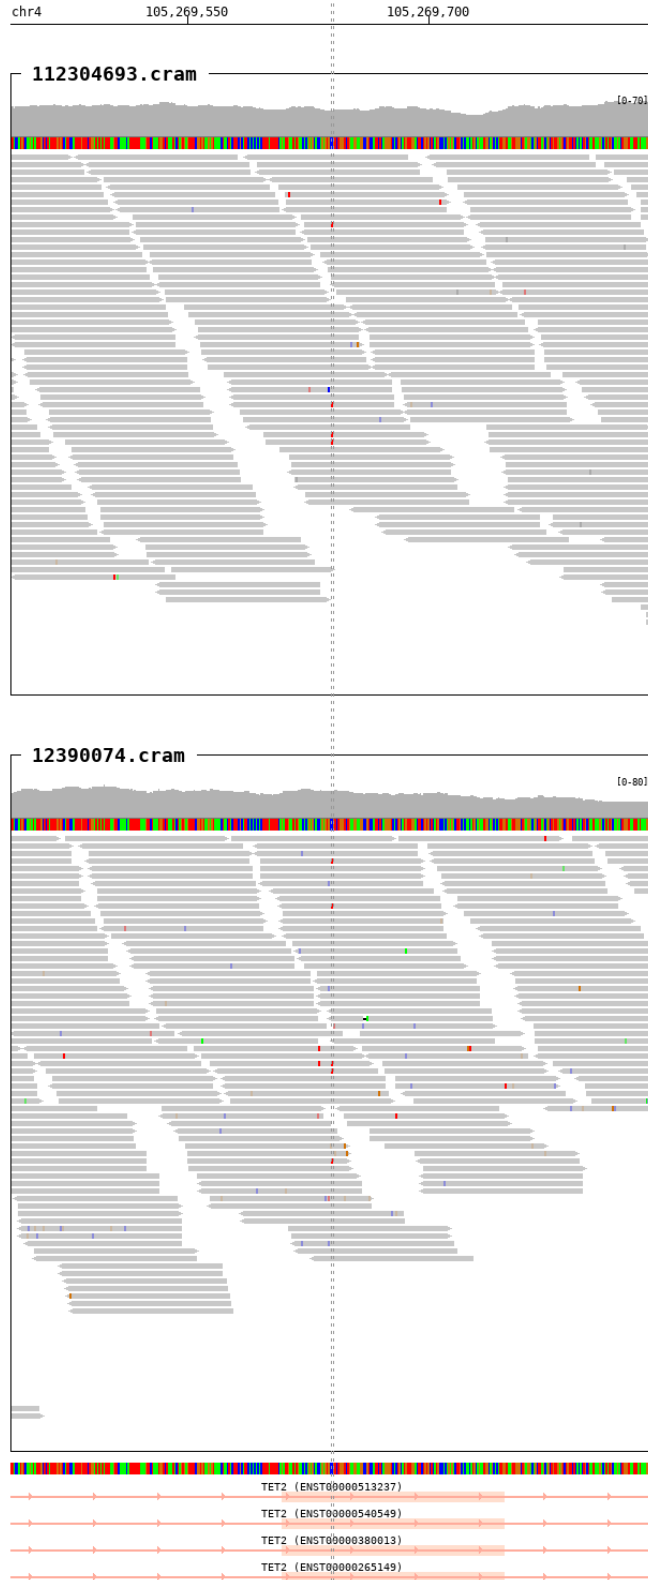

34.74. chr4\_105269662\_G/A

| SampleID | Variants (GRCh38)  | Ref_depth | Alt_depth | Gene | Consequence      |
|----------|--------------------|-----------|-----------|------|------------------|
| 63652    | chr4_105269662_G/A | 71        | 13        | TET2 | missense_variant |

chr4 105,269,550 105,269,700 105,269,850

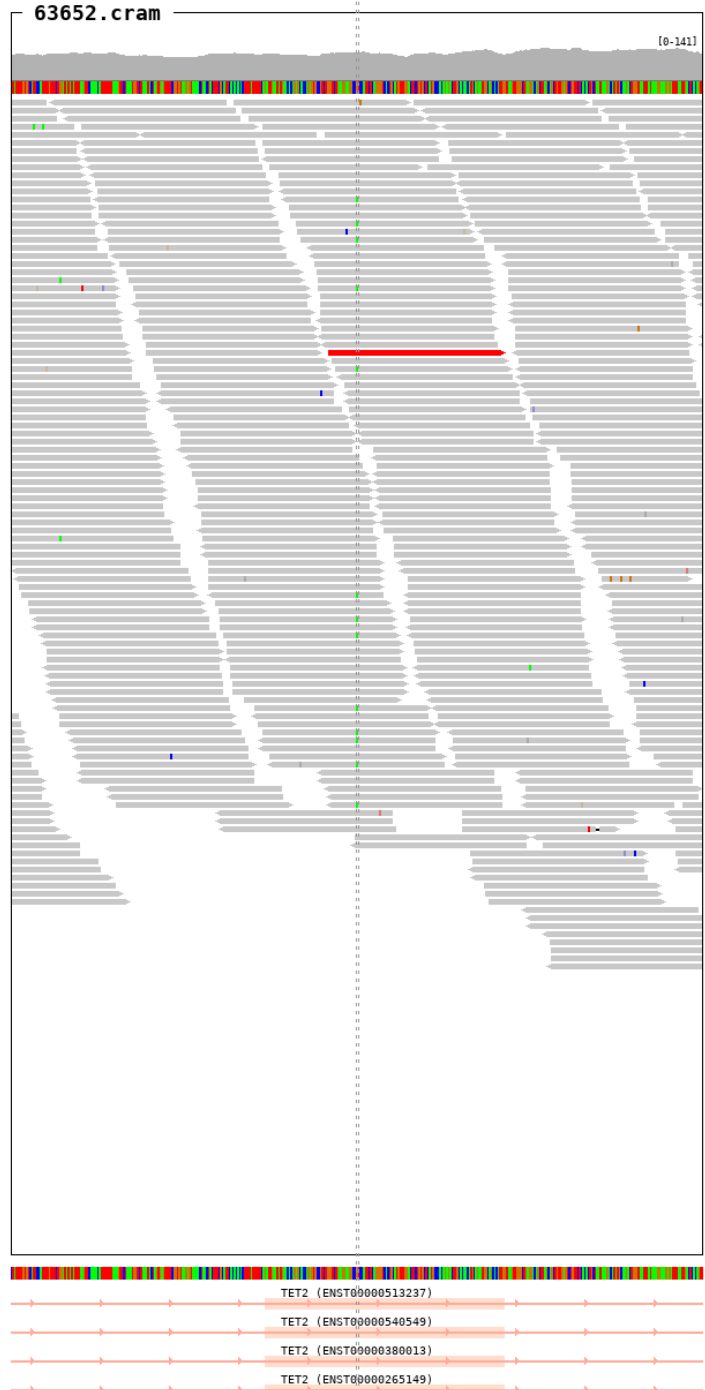

34.75. chr4\_105269671\_C/T

| SampleID | Variants (GRCh38)  | Ref_depth | Alt_depth | Gene | Consequence      |
|----------|--------------------|-----------|-----------|------|------------------|
| 10672171 | chr4_105269671_C/T | 33        | 6         | TET2 | missense_variant |

chr4 105,269,550 105,269,700 105,269,85

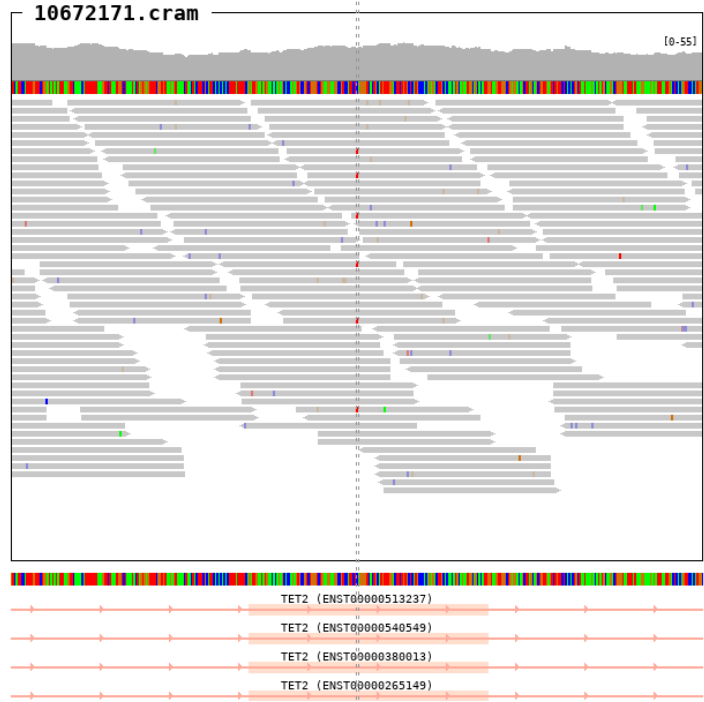

34.76. chr4\_105269680\_C/T

| SampleID  | Variants (GRCh38)  | Ref_depth | Alt_depth | Gene | Consequence      |
|-----------|--------------------|-----------|-----------|------|------------------|
| 100604547 | chr4_105269680_C/T | 34        | 7         | TET2 | missense_variant |

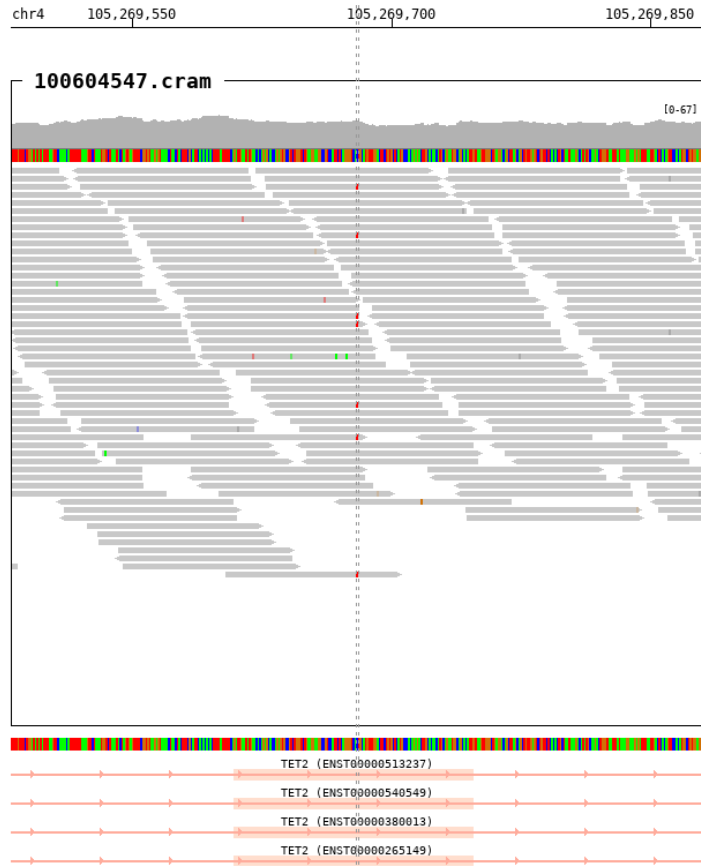

34.77. chr4\_105269694\_TC/-

| SampleID | Variants (GRCh38)   | Ref_depth | Alt_depth | Gene | Consequence        |
|----------|---------------------|-----------|-----------|------|--------------------|
| 62459    | chr4_105269694_TC/- | 38        | 4         | TET2 | frameshift_variant |

chr4 105,269,550 105,269,700 105,269,850

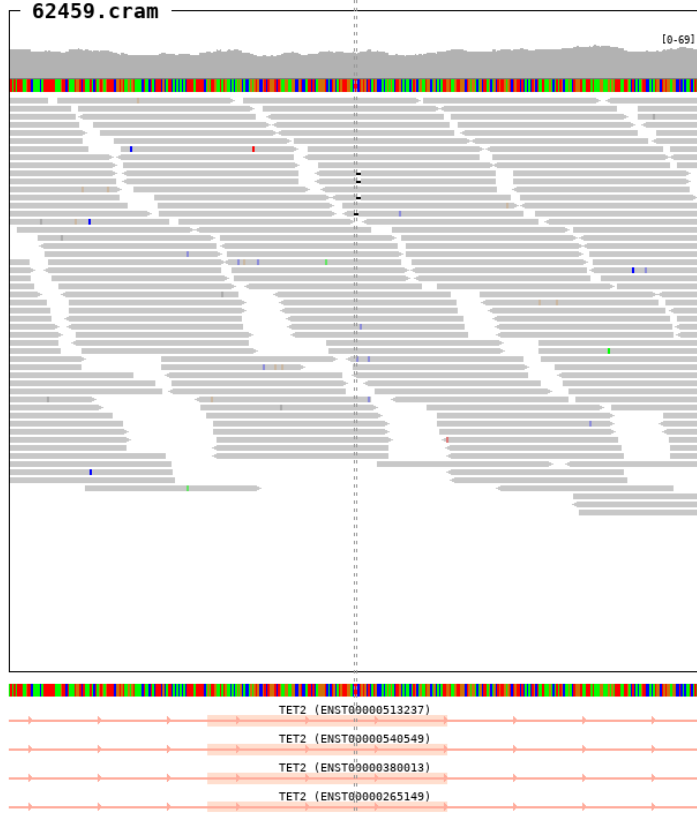

34.78. chr4\_105272614\_-/G

| SampleID  | Variants (GRCh38)  | Ref_depth | Alt_depth | Gene | Consequence        |
|-----------|--------------------|-----------|-----------|------|--------------------|
| 102100099 | chr4_105272614_-/G | 46        | 4         | TET2 | frameshift_variant |

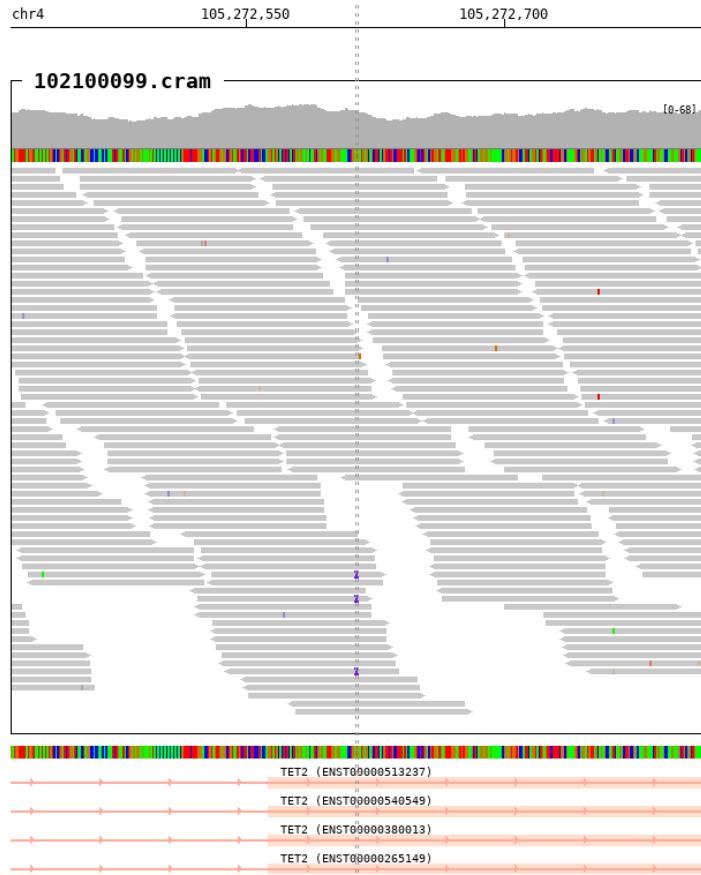

34.79. chr4\_105272629\_C/G

| SampleID  | Variants (GRCh38)  | Ref_depth | Alt_depth | Gene | Consequence      |
|-----------|--------------------|-----------|-----------|------|------------------|
| 100602519 | chr4_105272629_C/G | 41        | 5         | TET2 | missense_variant |

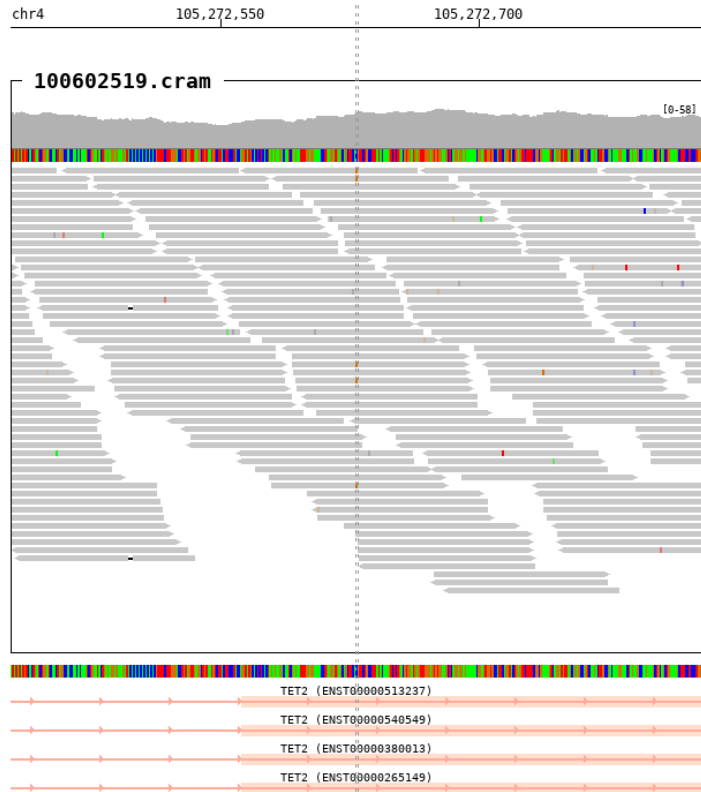

34.80. chr4\_105272634\_T/C

| SampleID  | Variants (GRCh38)  | Ref_depth | Alt_depth | Gene | Consequence      |
|-----------|--------------------|-----------|-----------|------|------------------|
| 100609351 | chr4_105272634_T/C | 44        | 6         | TET2 | missense_variant |

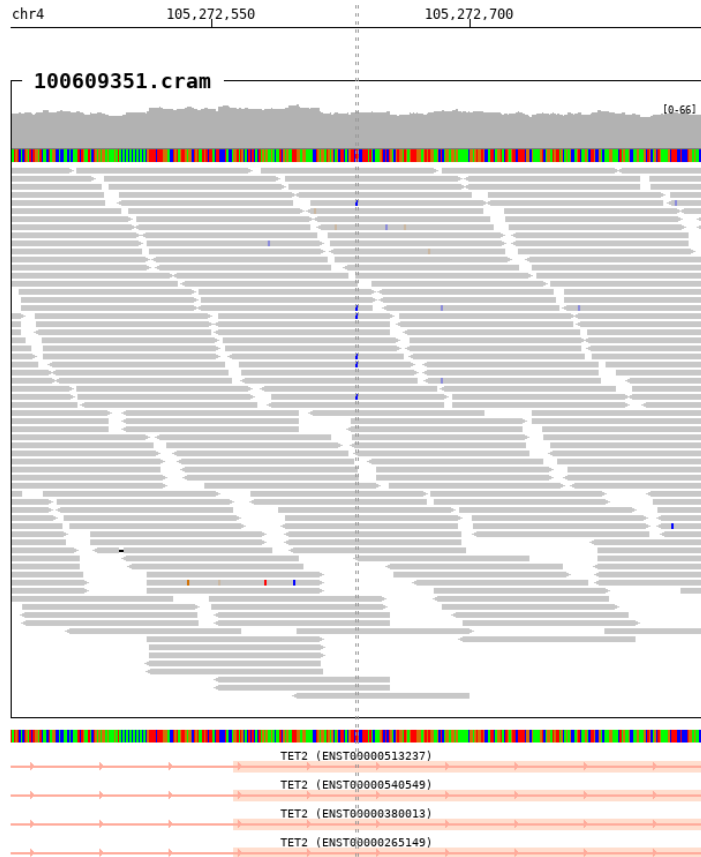

34.81. chr4\_105272693\_-/A

| SampleID | Variants (GRCh38)  | Ref_depth | Alt_depth | Gene | Consequence        |
|----------|--------------------|-----------|-----------|------|--------------------|
| 65259    | chr4_105272693_-/A | 35        | 9         | TET2 | frameshift_variant |

chr4 105,272,550 105,272,700 105,272,850

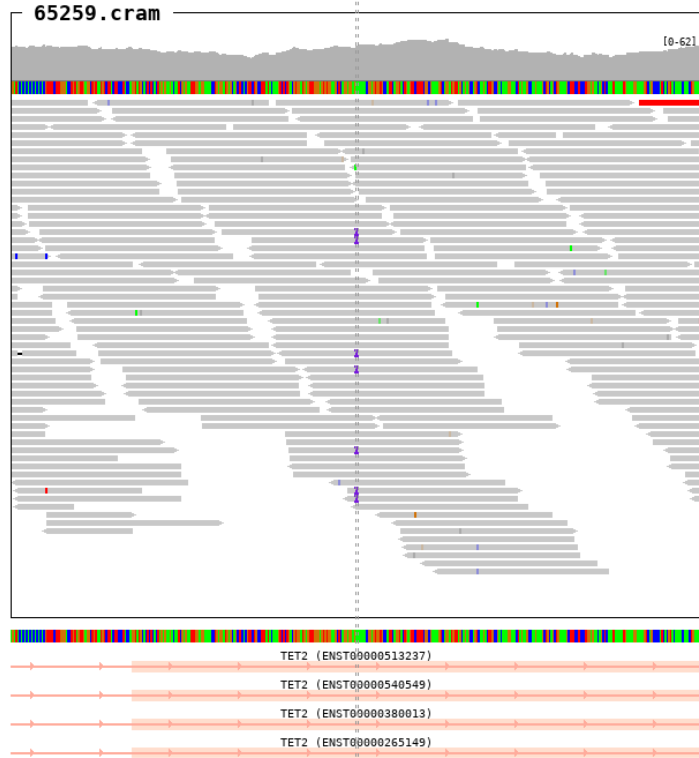

34.82. chr4\_105272707\_-/T

| SampleID | Variants (GRCh38)  | Ref_depth | Alt_depth | Gene | Consequence        |
|----------|--------------------|-----------|-----------|------|--------------------|
| 10012444 | chr4_105272707_-/T | 28        | 4         | TET2 | frameshift_variant |

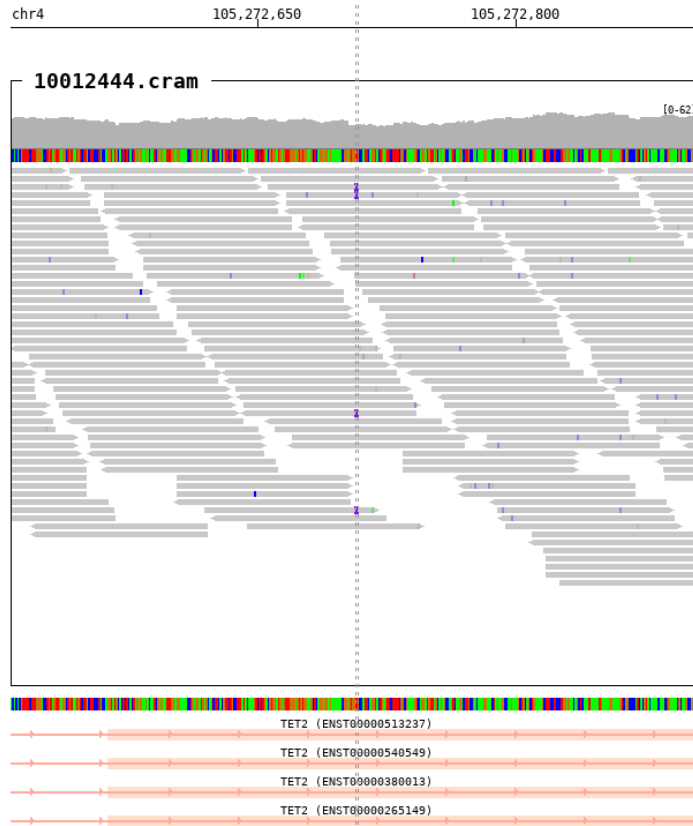

34.83. chr4\_105272774\_C/T

| SampleID  | Variants (GRCh38)  | Ref_depth | Alt_depth | Gene | Consequence |
|-----------|--------------------|-----------|-----------|------|-------------|
| 110106089 | chr4_105272774_C/T | 36        | 4         | TET2 | stop_gained |
| 66392     | chr4_105272774_C/T | 30        | 4         | TET2 | stop_gained |

chr4 105,272,650 105,272,800 105,272,950

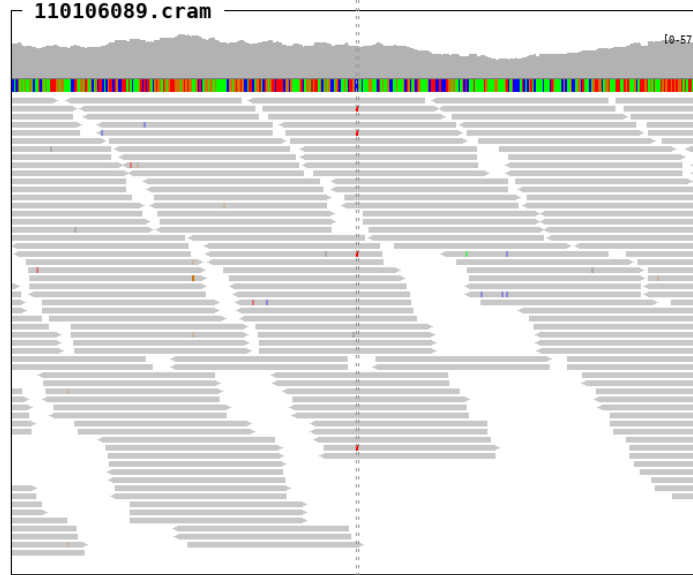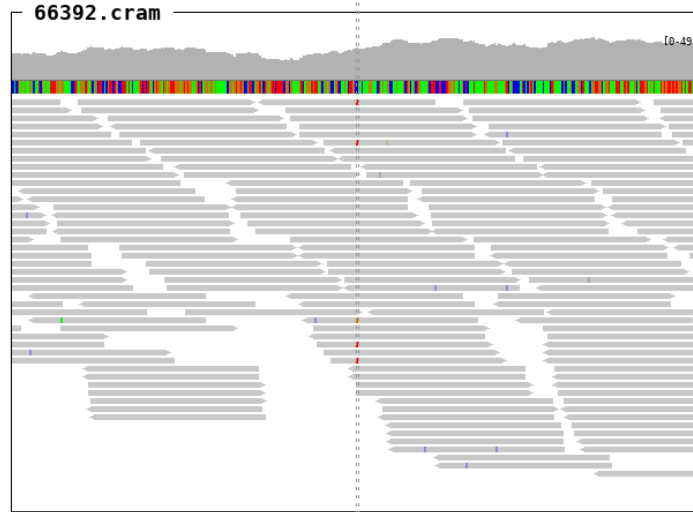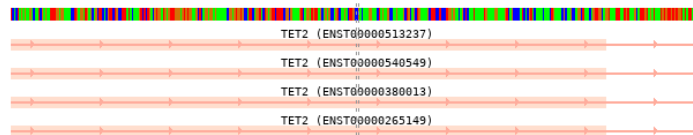

34.84. chr4\_105275131\_C/T

| SampleID   | Variants (GRCh38)  | Ref_depth | Alt_depth | Gene | Consequence |
|------------|--------------------|-----------|-----------|------|-------------|
| 1501033209 | chr4_105275131_C/T | 32        | 3         | TET2 | stop_gained |

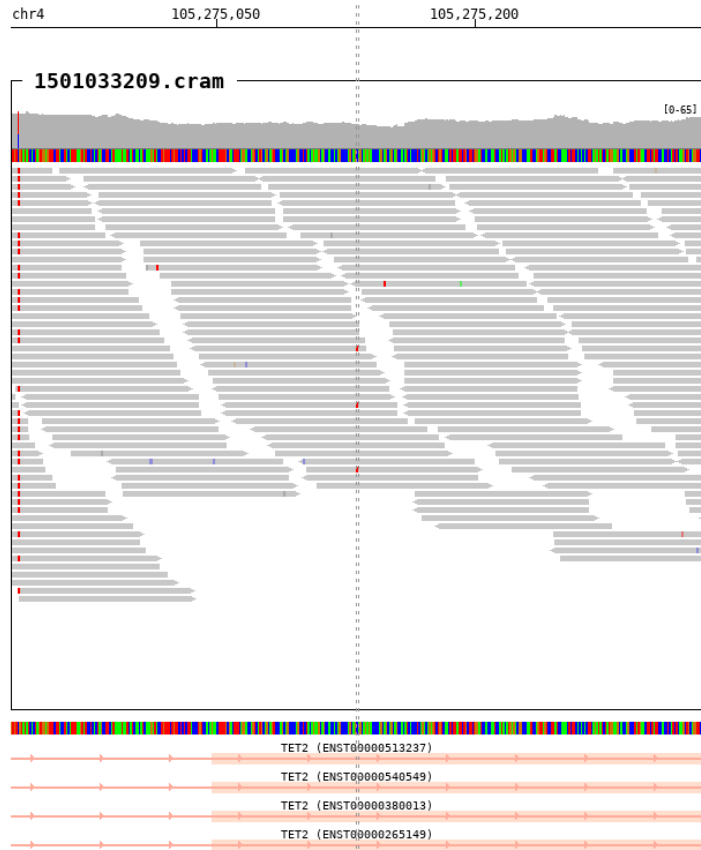

34.85. chr4\_105275146\_C/T

| SampleID  | Variants (GRCh38)  | Ref_depth | Alt_depth | Gene | Consequence |
|-----------|--------------------|-----------|-----------|------|-------------|
| 101601639 | chr4_105275146_C/T | 44        | 13        | TET2 | stop_gained |

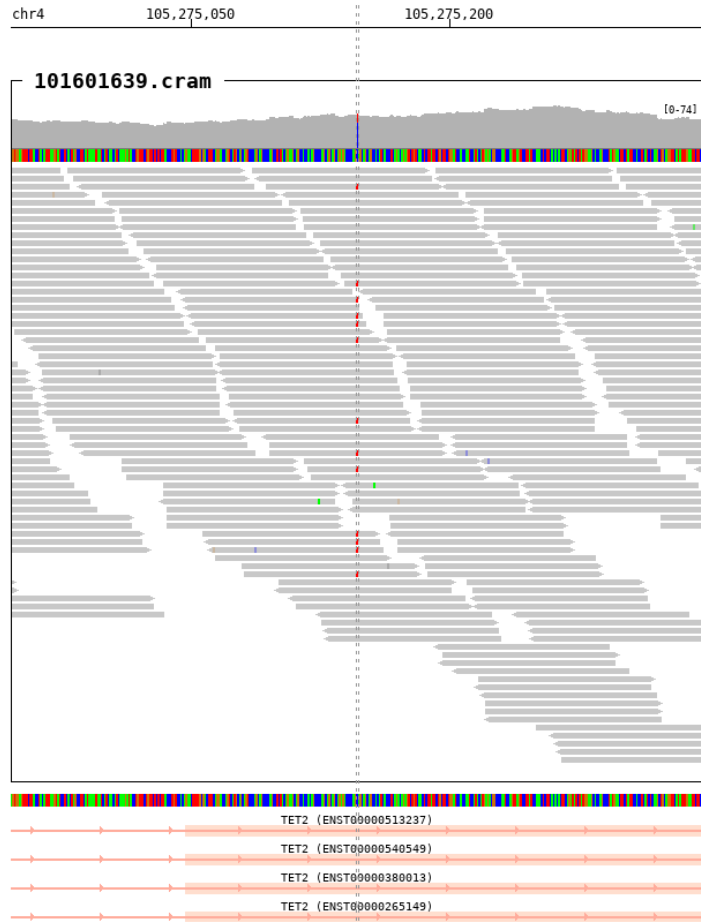

34.86. chr4\_105275177\_T/-

| SampleID  | Variants (GRCh38)  | Ref_depth | Alt_depth | Gene | Consequence        |
|-----------|--------------------|-----------|-----------|------|--------------------|
| 112302879 | chr4_105275177_T/- | 34        | 10        | TET2 | frameshift_variant |

chr4 105,275,050 105,275,200 105,275,350

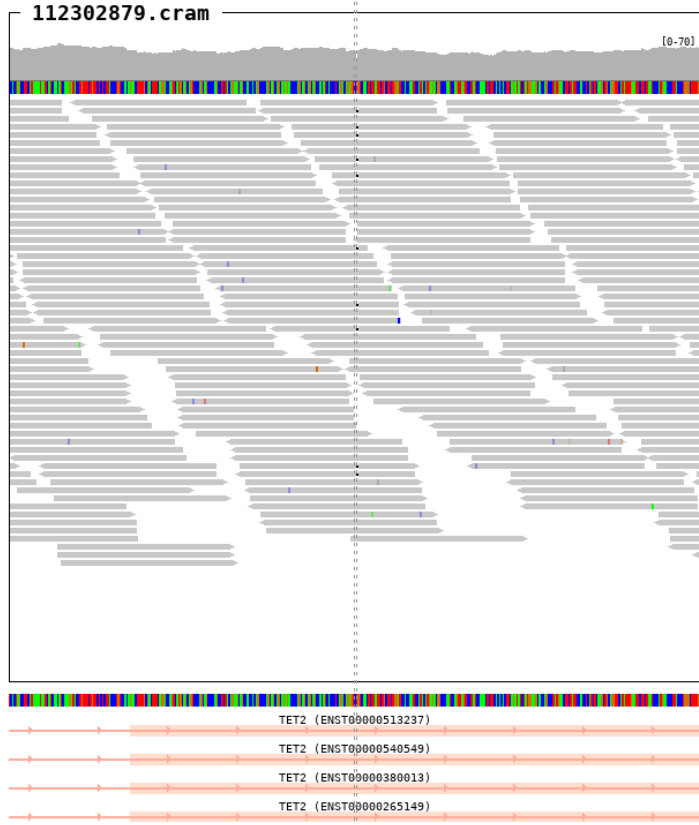

34.87. chr4\_105275189\_-/A

| SampleID  | Variants (GRCh38)  | Ref_depth | Alt_depth | Gene | Consequence |
|-----------|--------------------|-----------|-----------|------|-------------|
| 100603317 | chr4_105275189_-/A | 25        | 6         | TET2 | stop_gained |

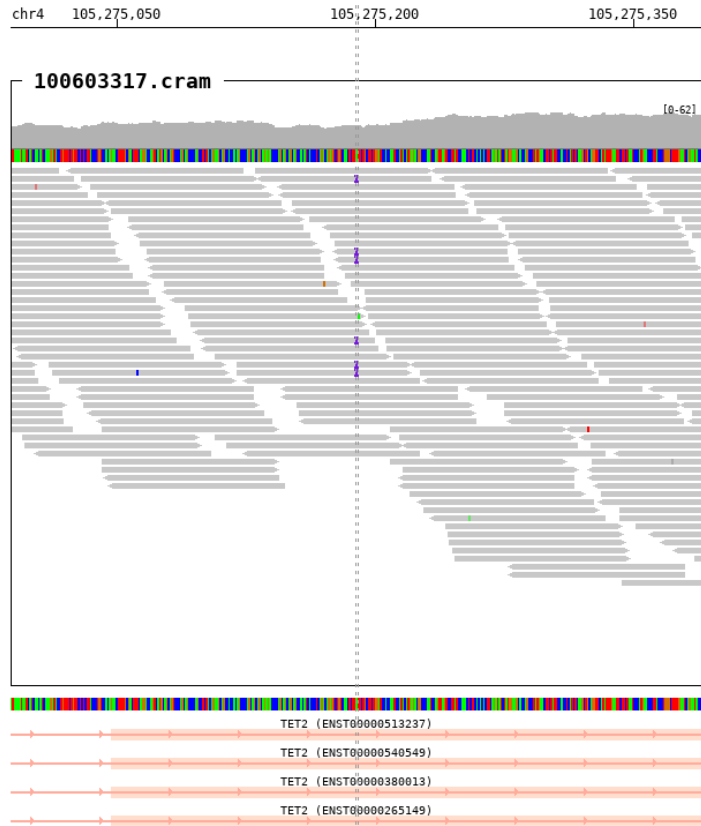

34.88. chr4\_105275252\_C/-

| SampleID | Variants (GRCh38)  | Ref_depth | Alt_depth | Gene | Consequence        |
|----------|--------------------|-----------|-----------|------|--------------------|
| 65188    | chr4_105275252_C/- | 43        | 5         | TET2 | frameshift_variant |

chr4 105,275,150 105,275,300 105,27

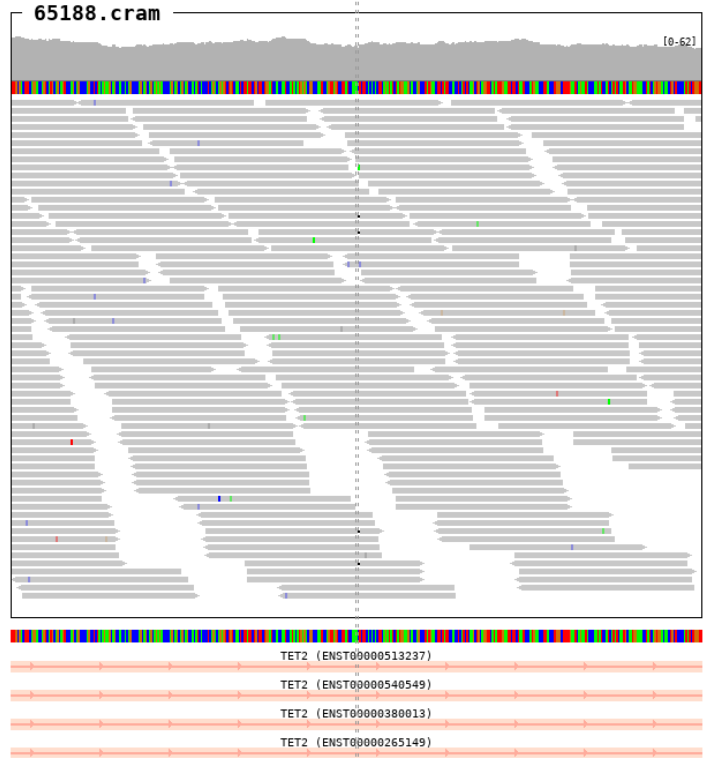

34.89. chr4\_105275267\_C/A

| SampleID | Variants (GRCh38)  | Ref_depth | Alt_depth | Gene | Consequence |
|----------|--------------------|-----------|-----------|------|-------------|
| 10931308 | chr4_105275267_C/A | 42        | 4         | TET2 | stop_gained |

chr4 105,275,150 105,275,300 105,275,400

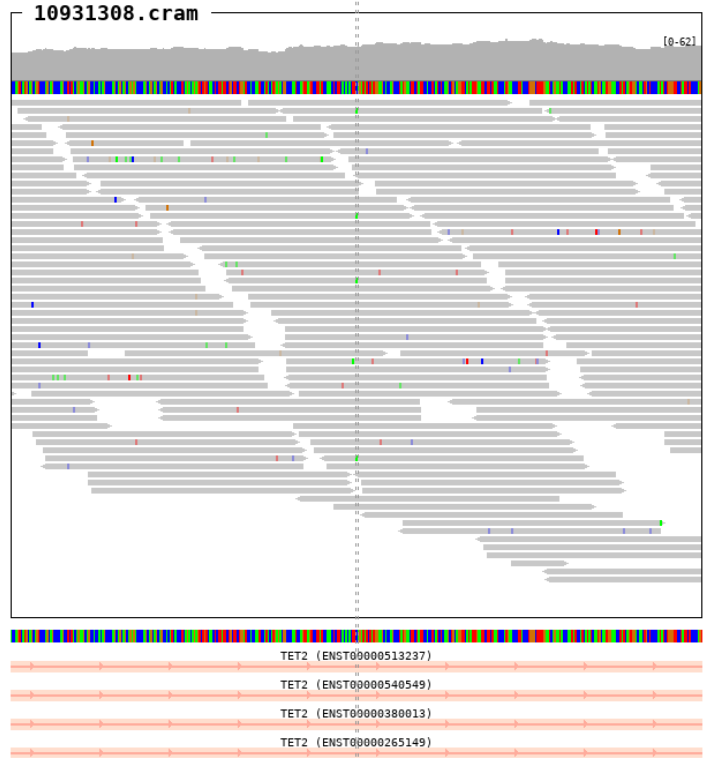

34.90. chr4\_105275448\_GGTTCTATTCTCCCC/-

| SampleID | Variants (GRCh38)                    | Ref_depth | Alt_depth | Gene | Consequence        |
|----------|--------------------------------------|-----------|-----------|------|--------------------|
| 11050820 | chr4_105275448_GGTTCTATTCTCCCC/<br>- | 53        | 6         | TET2 | frameshift_variant |

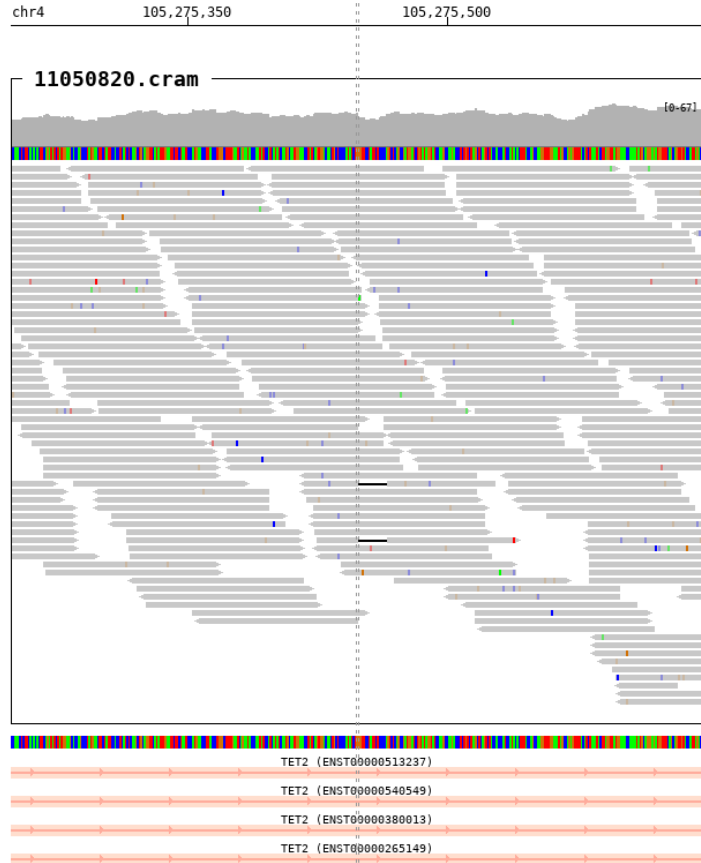

34.91. chr4\_105275510\_GTCTAAGCTCA/-

| SampleID  | Variants (GRCh38)            | Ref_depth | Alt_depth | Gene | Consequence        |
|-----------|------------------------------|-----------|-----------|------|--------------------|
| 101106908 | chr4_105275510_GTCTAAGCTCA/- | 28        | 8         | TET2 | frameshift_variant |

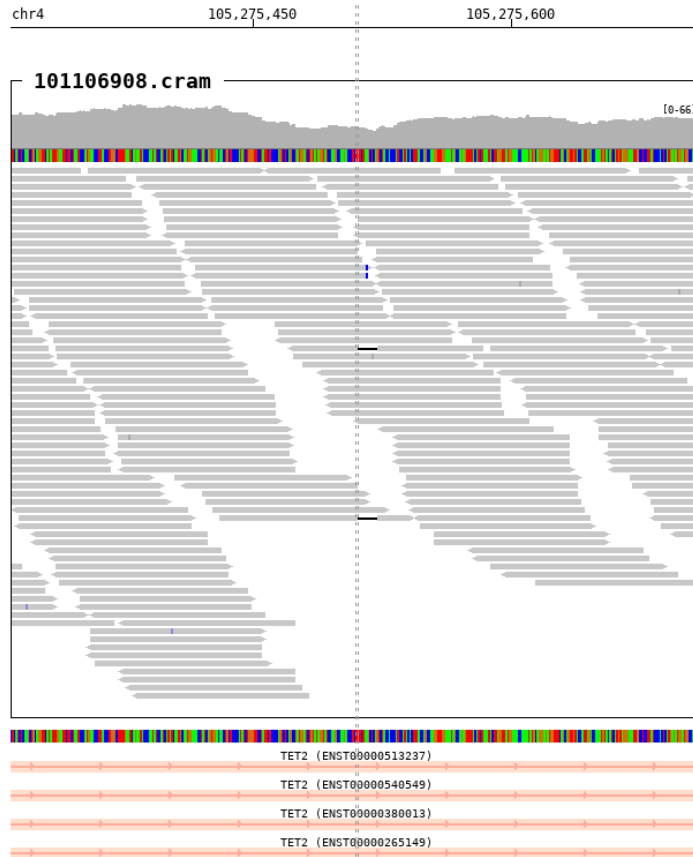

34.92. chr4\_105275758\_ACTATAAAAAT/-

| SampleID | Variants (GRCh38)            | Ref_depth | Alt_depth | Gene | Consequence        |
|----------|------------------------------|-----------|-----------|------|--------------------|
| 68866    | chr4_105275758_ACTATAAAAAT/- | 56        | 7         | TET2 | frameshift_variant |

chr4 105,275,650 105,275,800 105,275

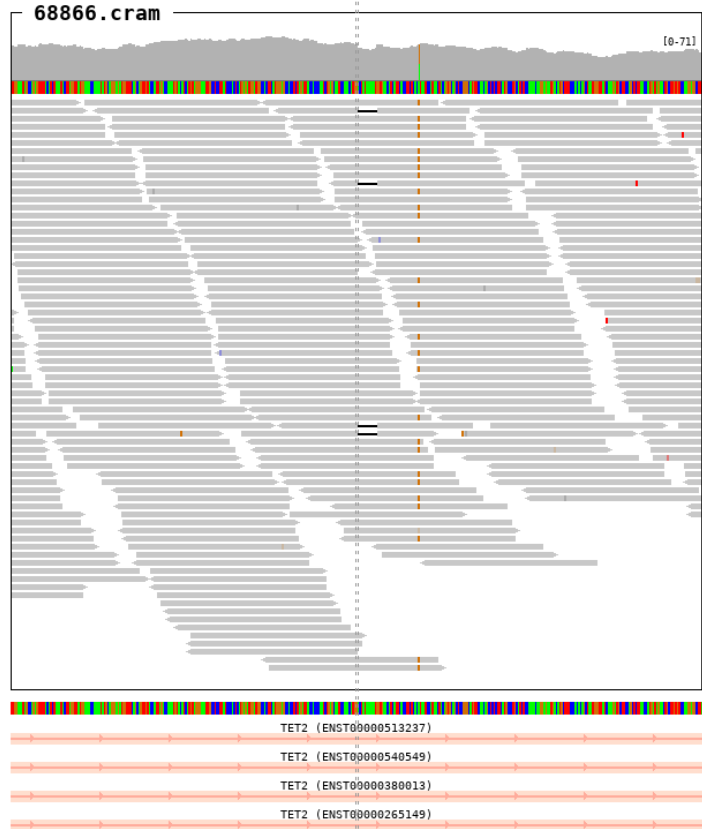

34.93. chr4\_105276010\_C/T

| SampleID  | Variants (GRCh38)  | Ref_depth | Alt_depth | Gene | Consequence |
|-----------|--------------------|-----------|-----------|------|-------------|
| 102102625 | chr4_105276010_C/T | 29        | 6         | TET2 | stop_gained |

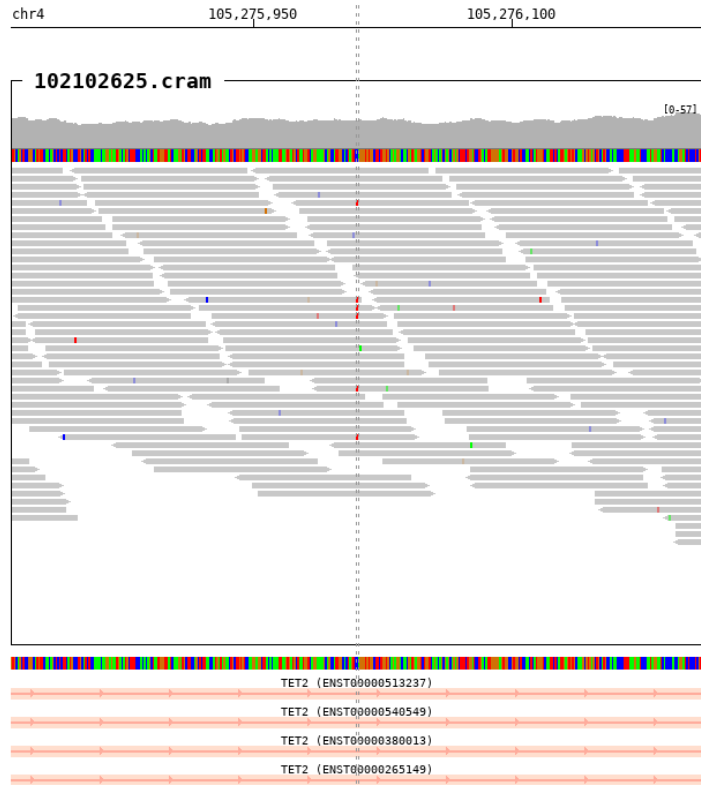

34.94. chr4\_105276088\_-/G

| SampleID  | Variants (GRCh38)  | Ref_depth | Alt_depth | Gene | Consequence        |
|-----------|--------------------|-----------|-----------|------|--------------------|
| 101607763 | chr4_105276088_-/G | 38        | 5         | TET2 | frameshift_variant |

chr4 105,275,950 105,276,100 105,276,250

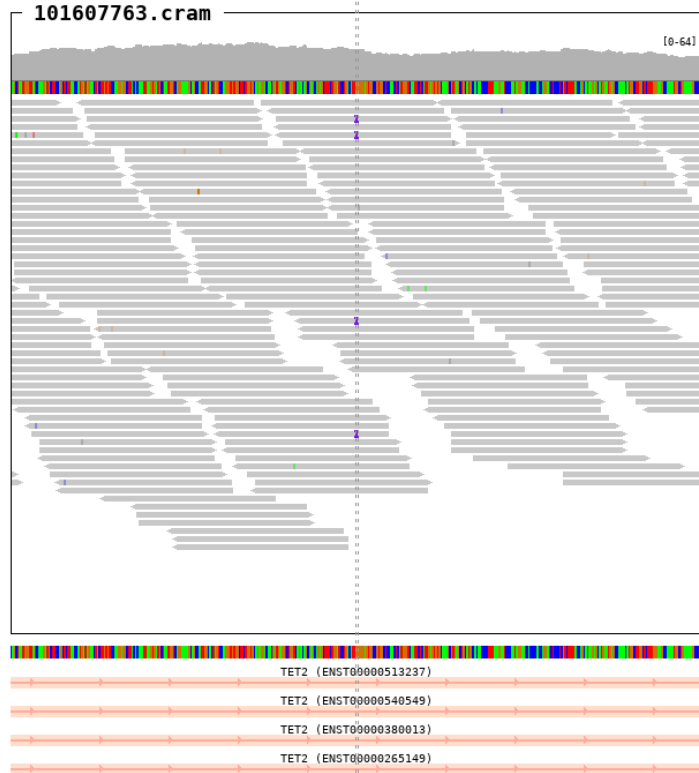

34.95. chr4\_105276116\_G/A

| SampleID  | Variants (GRCh38)  | Ref_depth | Alt_depth | Gene | Consequence      |
|-----------|--------------------|-----------|-----------|------|------------------|
| 110101129 | chr4_105276116_G/A | 39        | 5         | TET2 | missense_variant |

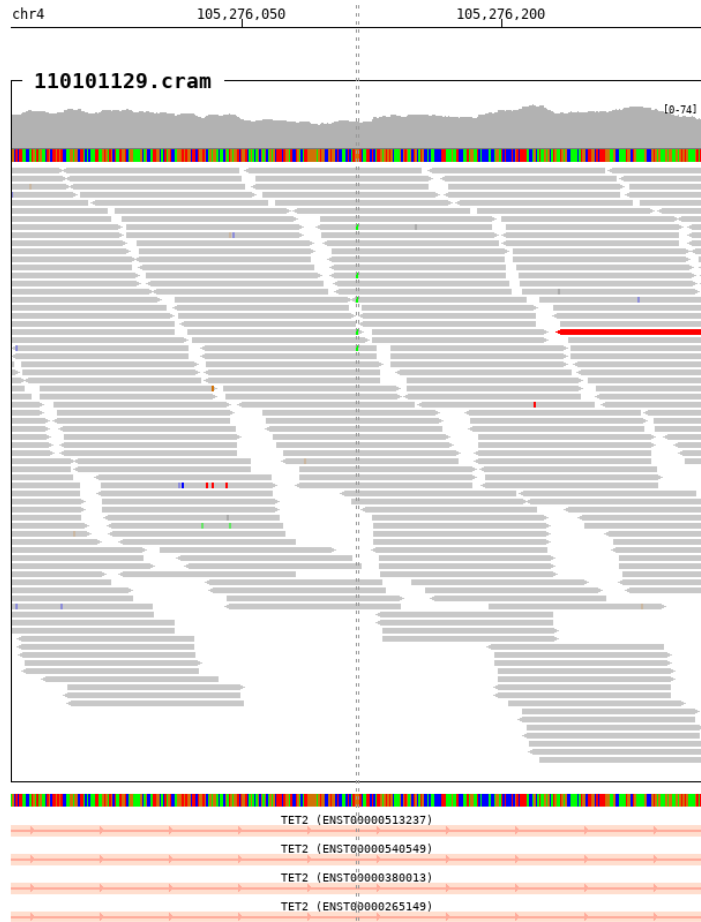

34.96. chr4\_105276119\_C/G

| SampleID  | Variants (GRCh38)  | Ref_depth | Alt_depth | Gene | Consequence |
|-----------|--------------------|-----------|-----------|------|-------------|
| 112302122 | chr4_105276119_C/G | 35        | 3         | TET2 | stop_gained |

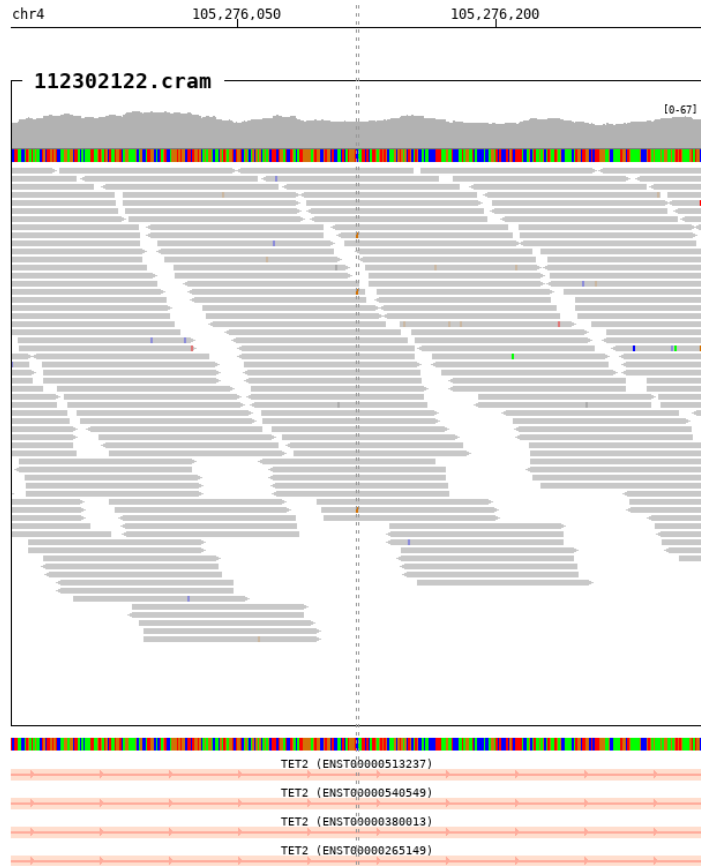

34.97. chr4\_105276131\_A/C

| SampleID | Variants (GRCh38)  | Ref_depth | Alt_depth | Gene | Consequence      |
|----------|--------------------|-----------|-----------|------|------------------|
| 61478    | chr4_105276131_A/C | 41        | 10        | TET2 | missense_variant |

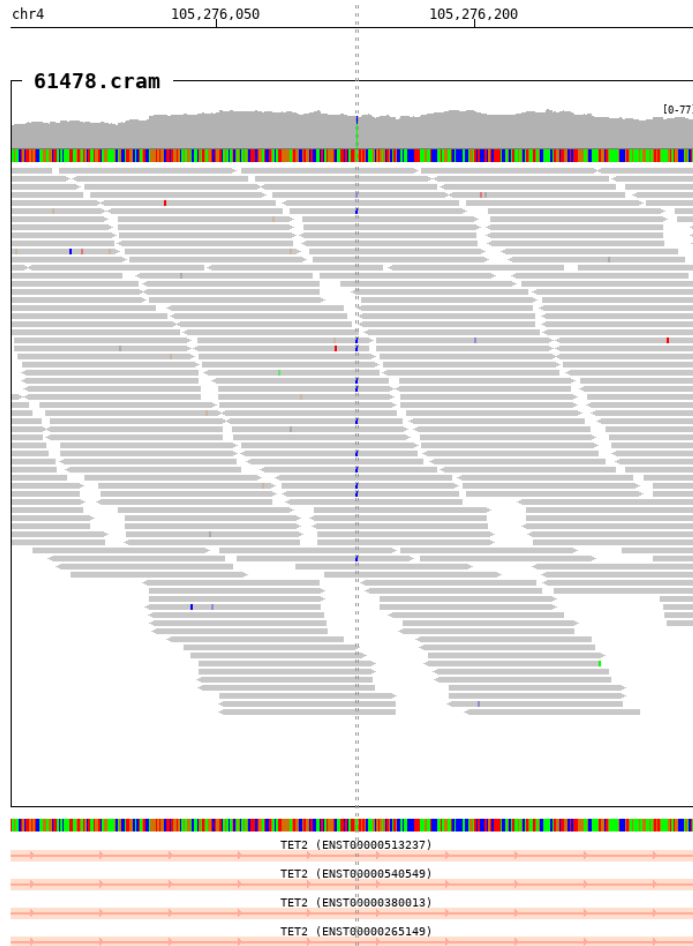

34.98. chr4\_105276160\_A/G

| SampleID | Variants (GRCh38)  | Ref_depth | Alt_depth | Gene | Consequence      |
|----------|--------------------|-----------|-----------|------|------------------|
| 61101    | chr4_105276160_A/G | 30        | 11        | TET2 | missense_variant |

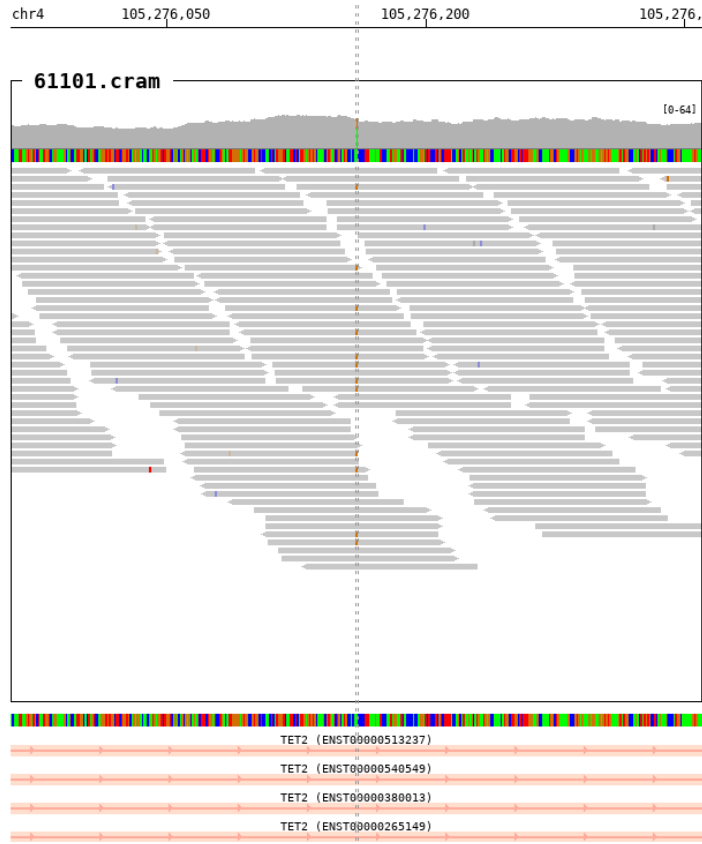

34.99. chr4\_105276198\_-/GA

| SampleID | Variants (GRCh38)   | Ref_depth | Alt_depth | Gene | Consequence        |
|----------|---------------------|-----------|-----------|------|--------------------|
| 11310938 | chr4_105276198_-/GA | 47        | 3         | TET2 | frameshift_variant |

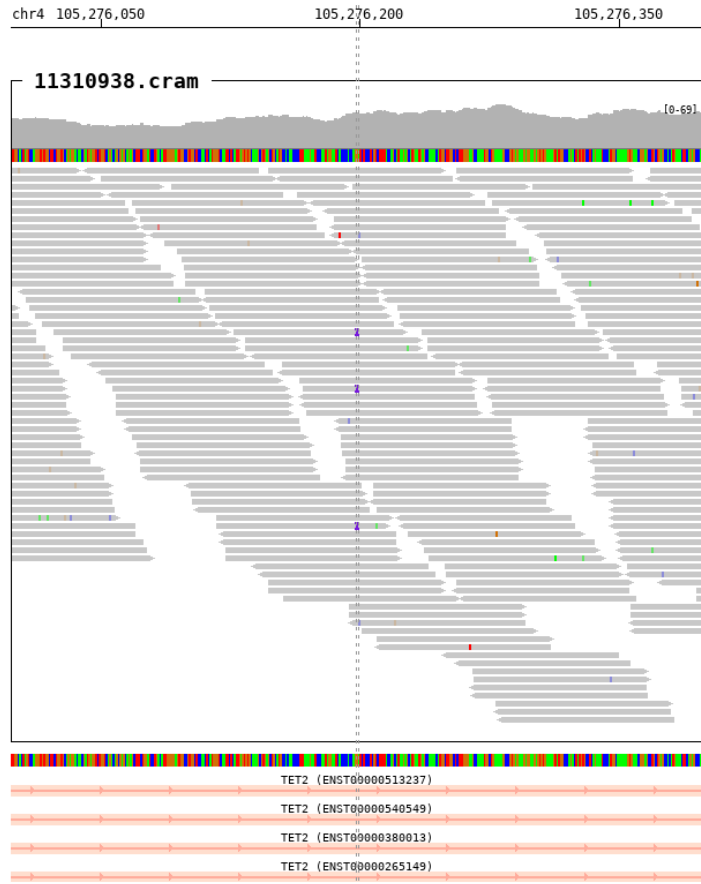

34.100. chr4\_105276221\_A/G

| SampleID | Variants (GRCh38)  | Ref_depth | Alt_depth | Gene | Consequence      |
|----------|--------------------|-----------|-----------|------|------------------|
| 60432    | chr4_105276221_A/G | 41        | 5         | TET2 | missense_variant |

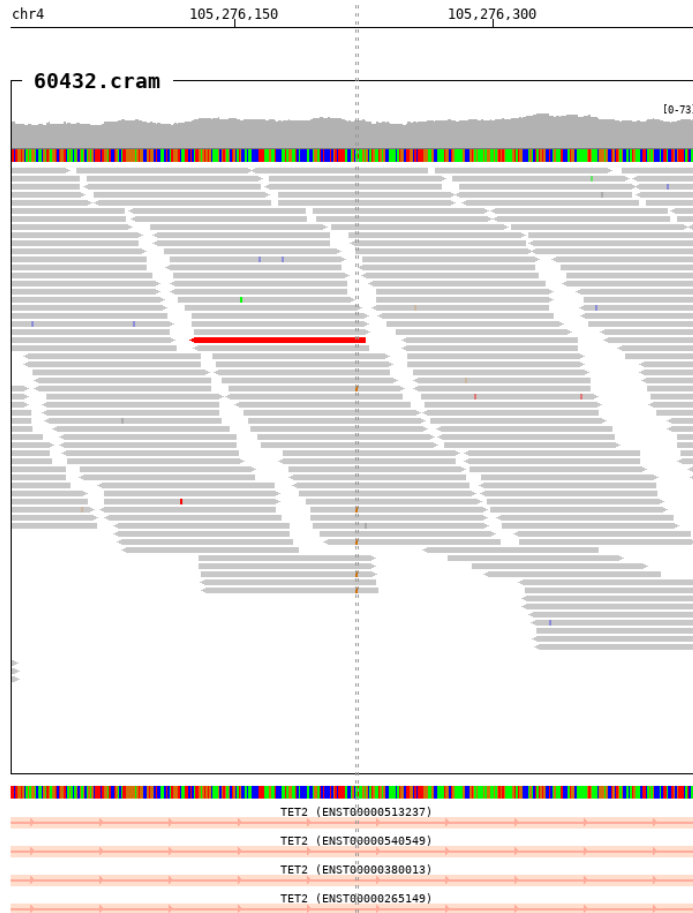

35. TP53

35.1. chr17\_7670581\_GGCCAGGAAGGGGCTGAGGTCACTCA/-

| SampleID  | Variants (GRCh38)                              | Ref_depth | Alt_depth | Gene | Consequence          |
|-----------|------------------------------------------------|-----------|-----------|------|----------------------|
| 102105154 | chr17_7670581_GGCCAGGAAGG<br>GGCTGAGGTCACTCA/- | 45        | 3         | TP53 | splice_donor_variant |
| 110105822 | chr17_7670581_GGCCAGGAAGG<br>GGCTGAGGTCACTCA/- | 52        | 3         | TP53 | splice_donor_variant |
| 112302240 | chr17_7670581_GGCCAGGAAGG<br>GGCTGAGGTCACTCA/- | 60        | 3         | TP53 | splice_donor_variant |

chr17 7,670,450 7,670,600 7,670,750

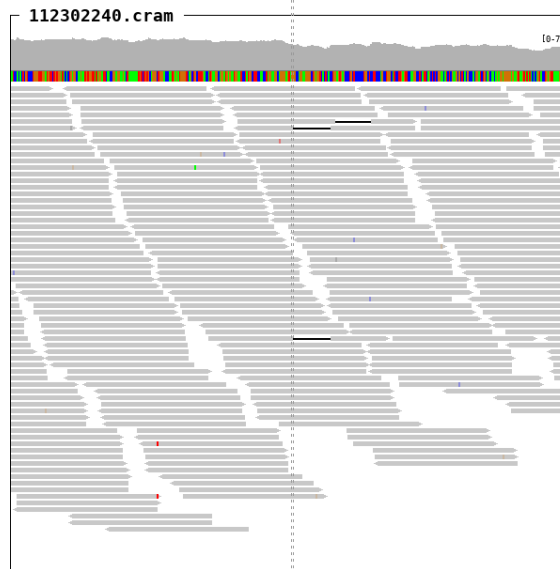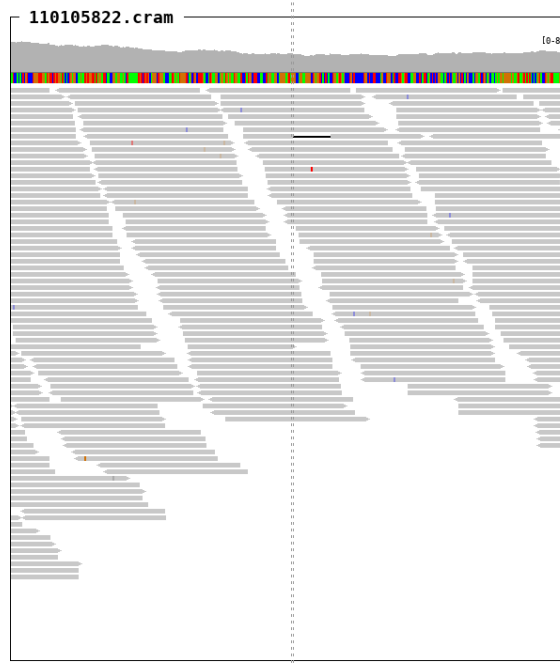

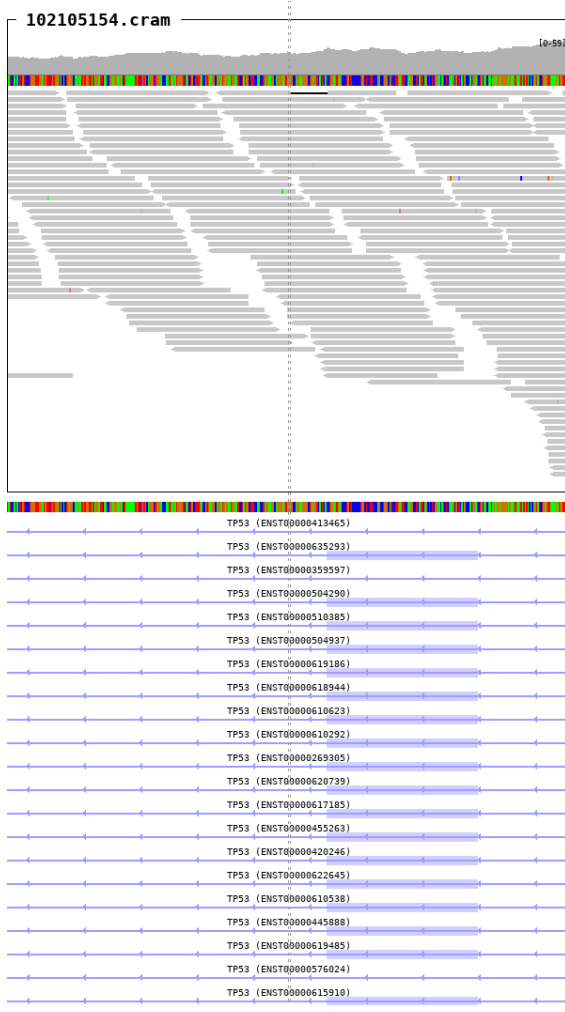

35.2. chr17\_7674220\_C/T

| SampleID  | Variants (GRCh38) | Ref_depth | Alt_depth | Gene | Consequence      |
|-----------|-------------------|-----------|-----------|------|------------------|
| 101605284 | chr17_7674220_C/T | 38        | 4         | TP53 | missense_variant |

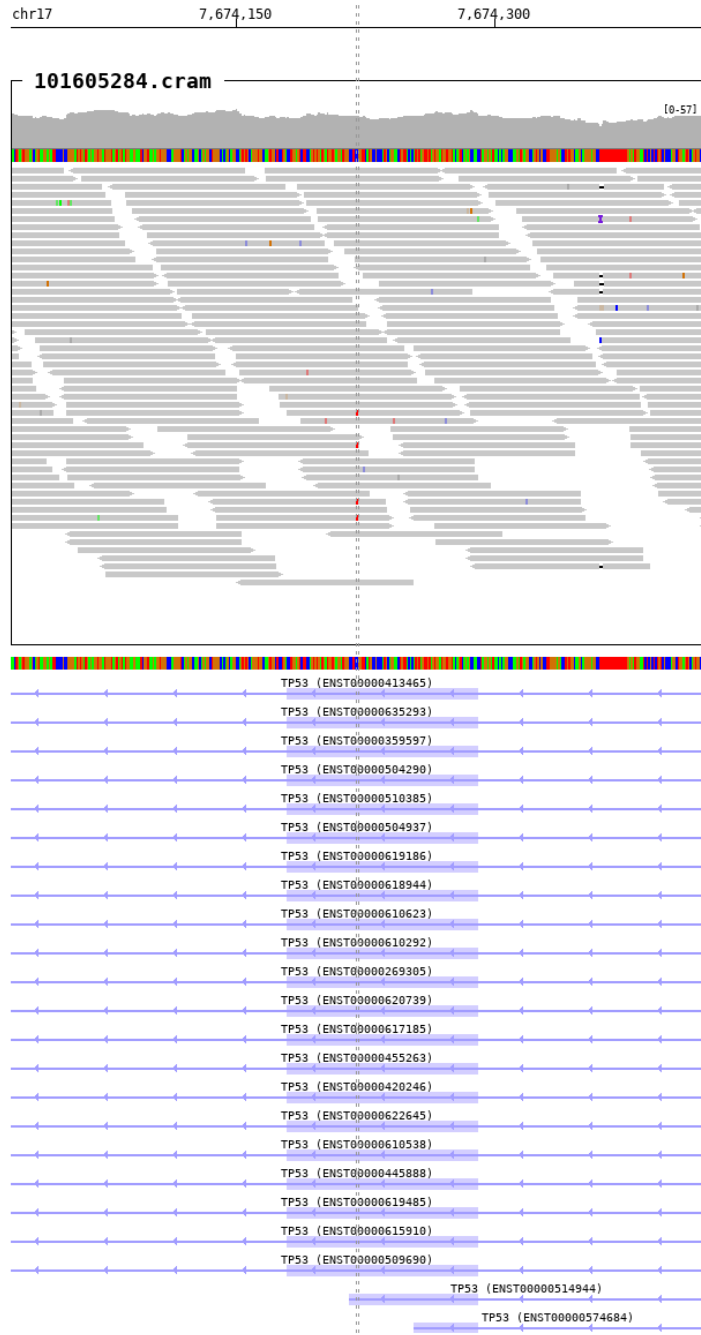

35.3. chr17\_7674252\_C/T

| SampleID | Variants (GRCh38) | Ref_depth | Alt_depth | Gene | Consequence      |
|----------|-------------------|-----------|-----------|------|------------------|
| 10310691 | chr17_7674252_C/T | 44        | 5         | TP53 | missense_variant |

chr17 7,674,150 7,674,300 7,674

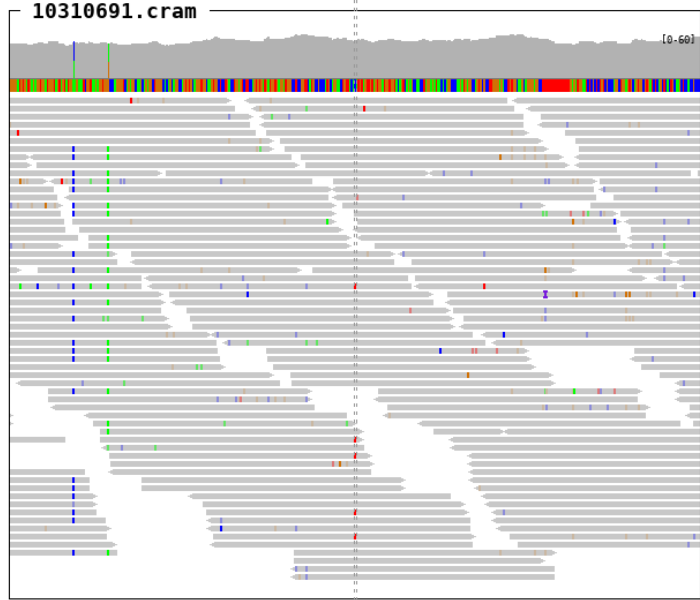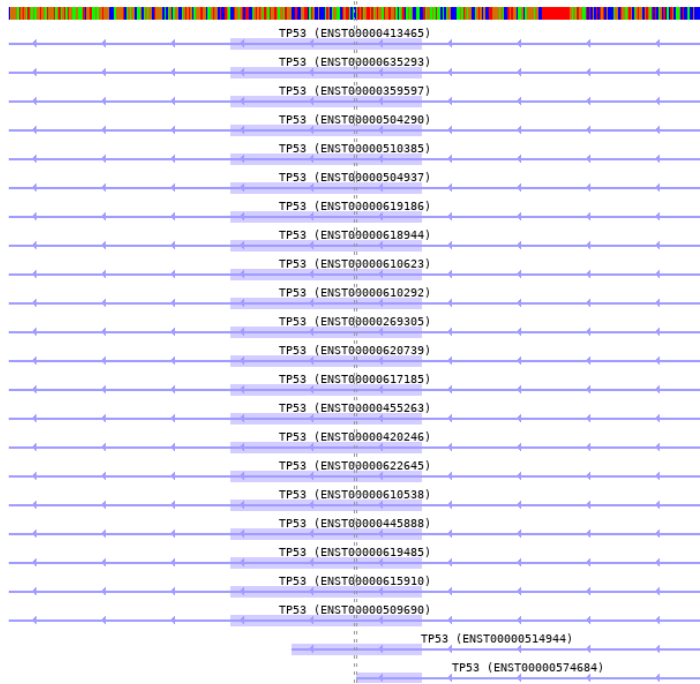

35.4. chr17\_7674885\_C/T

| SampleID | Variants (GRCh38) | Ref_depth | Alt_depth | Gene | Consequence      |
|----------|-------------------|-----------|-----------|------|------------------|
| 12320076 | chr17_7674885_C/T | 25        | 4         | TP53 | missense_variant |

chr17 7,674,750 7,674,900 7,675,050

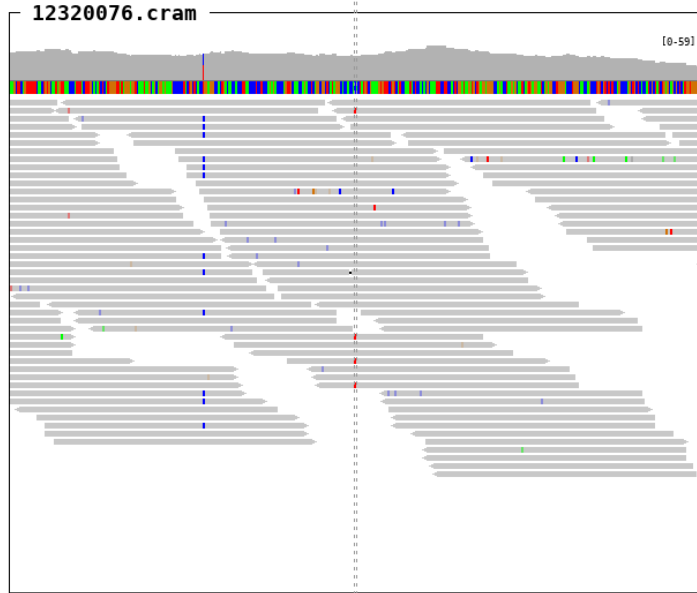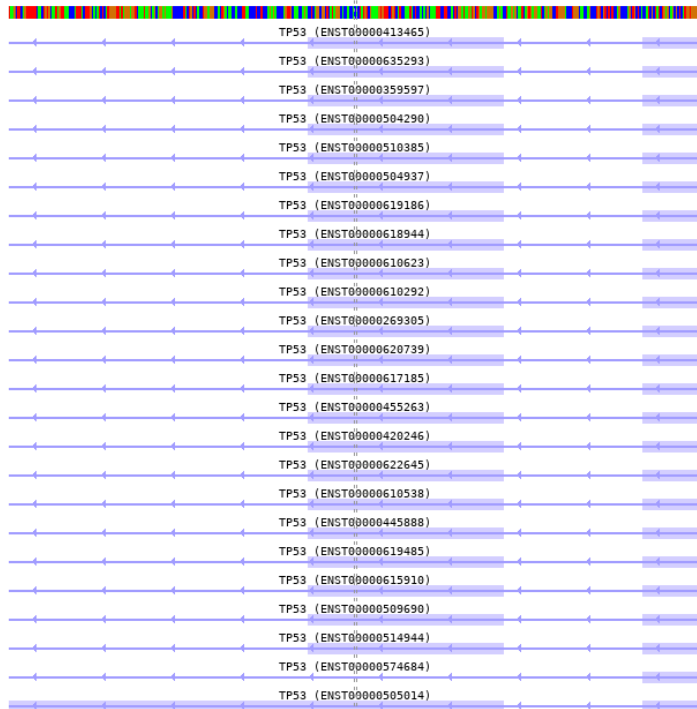

### 36. ZRSR2

#### 36.1. chrX\_15790496\_A/G

| SampleID | Variants (GRCh38) | Ref_depth | Alt_depth | Gene  | Consequence |
|----------|-------------------|-----------|-----------|-------|-------------|
| 10310468 | chrX_15790496_A/G | 16        | 5         | ZRSR2 | start_lost  |

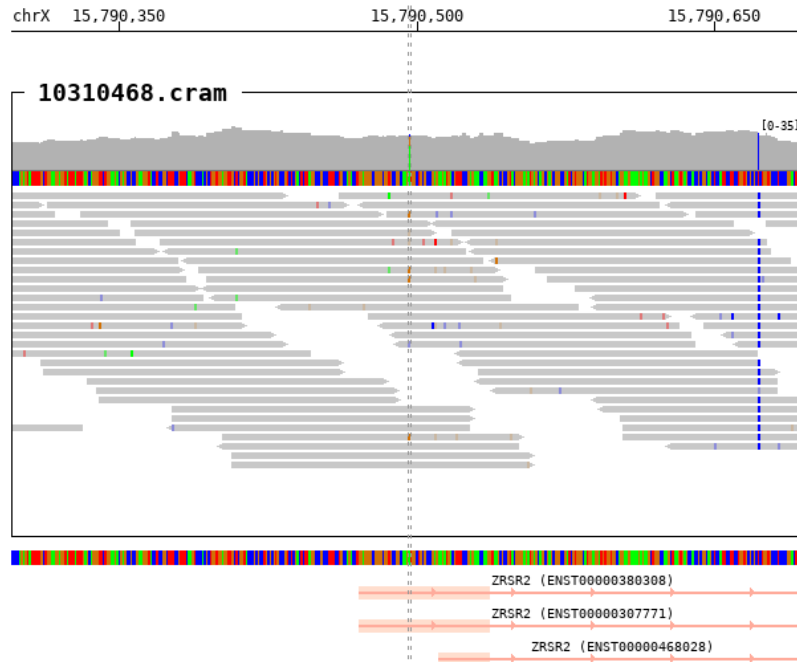

#### Reference:

- Jaiswal, S., Natarajan, P., Silver, A.J., Gibson, C.J., Bick, A.G., Shvartz, E., McConkey, M., Gupta, N., Gabriel, S., Ardissino, D., et al. (2017). Clonal Hematopoiesis and Risk of Atherosclerotic Cardiovascular Disease. *N. Engl. J. Med.* 377, 111–121.
